# Supplementary material for: Aberrant expression of claudin‐6 contributes to malignant potentials and drug resistance of cervical adenocarcinoma
Source: PubMed Central journal article supplement — Cancer Sci. 2022 Feb 13;113(4):1519–30. doi: 10.1111/cas.15284 (PMC8990859; doi:10.1111/cas.15284), 2022-02-13
Supplement: CAS-113-1519-s004.pdf [file CAS-113-1519-s004.pdf]

| No.  | Accession | Description                                                                | Sum PEP Score | CTRL Abundances_1 | CTRL Abundances_2 | CTRL Abundances_3 | CTRL Abundances_4 | CLDN6-1 Abundances_1 | CLDN6-1 Abundances_2 | CLDN6-1 Abundances_3 | CLDN6-1 Abundances_4 | CLDN6-2 Abundances_1 | CLDN6-2 Abundances_2 | CLDN6-2 Abundances_3 | CLDN6-2 Abundances_4 |
|------|-----------|----------------------------------------------------------------------------|---------------|-------------------|-------------------|-------------------|-------------------|----------------------|----------------------|----------------------|----------------------|----------------------|----------------------|----------------------|----------------------|
| 1    | Q09666-1  | Neuroblast differentiation-associated protein AHNK [OS=Homo sapiens]       | 2658.011      | 2.28.E+10         | 2.33.E+10         | 2.32.E+10         | 2.28.E+10         | 3.01.E+10            | 3.02.E+10            | 3.02.E+10            | 3.08.E+10            | 2.82.E+10            | 2.77.E+10            | 2.78.E+10            | 2.75.E+10            |
| 2    | Q15149-1  | plectin [OS=Homo sapiens]                                                  | 2440.988      | 2.19.E+10         | 2.29.E+10         | 2.28.E+10         | 2.28.E+10         | 3.11.E+10            | 3.10.E+10            | 3.11.E+10            | 3.13.E+10            | 2.47.E+10            | 2.48.E+10            | 2.45.E+10            | 2.45.E+10            |
| 3    | Q15149-4  | Isoform 4 of Plectin [OS=Homo sapiens]                                     | 2017.013      | 1.74.E+08         | 1.88.E+08         | 1.92.E+08         | 1.93.E+08         | 2.44.E+08            | 2.41.E+08            | 2.45.E+08            | 2.49.E+08            | 1.92.E+08            | 2.02.E+08            | 2.01.E+08            | 2.03.E+08            |
| 4    | Q14204    | Cytoplasmic dynein 1 heavy chain 1 [OS=Homo sapiens]                       | 1502.876      | 7.66.E+09         | 7.49.E+09         | 7.40.E+09         | 7.55.E+09         | 8.69.E+09            | 8.44.E+09            | 8.52.E+09            | 8.43.E+09            | 9.11.E+09            | 9.01.E+09            | 9.04.E+09            | 9.25.E+09            |
| 5    | P21333    | Filamin-A [OS=Homo sapiens]                                                | 1459.836      | 1.06.E+10         | 1.07.E+10         | 1.06.E+10         | 1.06.E+10         | 1.73.E+10            | 1.74.E+10            | 1.75.E+10            | 1.77.E+10            | 1.47.E+10            | 1.46.E+10            | 1.47.E+10            | 1.48.E+10            |
| 6    | P49327    | Fatty acid synthase [OS=Homo sapiens]                                      | 1455.855      | 1.39.E+10         | 1.34.E+10         | 1.36.E+10         | 1.36.E+10         | 1.37.E+10            | 1.37.E+10            | 1.37.E+10            | 1.35.E+10            | 1.02.E+10            | 1.05.E+10            | 1.04.E+10            | 1.02.E+10            |
| 7    | Q9Y490    | Talin-1 [OS=Homo sapiens]                                                  | 1423.156      | 9.33.E+09         | 8.94.E+09         | 9.26.E+09         | 9.30.E+09         | 9.32.E+09            | 9.59.E+09            | 9.47.E+09            | 9.30.E+09            | 9.53.E+09            | 9.74.E+09            | 9.90.E+09            | 1.00.E+10            |
| 8    | P35579-1  | Myosin-9 [OS=Homo sapiens]                                                 | 1355.555      | 9.02.E+09         | 8.80.E+09         | 8.65.E+09         | 8.42.E+09         | 1.09.E+10            | 1.06.E+10            | 1.06.E+10            | 1.07.E+10            | 1.10.E+10            | 1.00.E+10            | 1.03.E+10            | 1.05.E+10            |
| 9    | P05787    | Keratin, type II cytoskeletal 8 [OS=Homo sapiens]                          | 1196.747      | 1.52.E+11         | 1.52.E+11         | 1.52.E+11         | 1.50.E+11         | 1.28.E+11            | 1.27.E+11            | 1.27.E+11            | 1.00.E+11            | 1.01.E+11            | 1.01.E+11            | 1.01.E+11            | 1.01.E+11            |
| 10   | Q13813    | Spectrin alpha chain, non-erythrocytic 1 [OS=Homo sapiens]                 | 1167.246      | 5.32.E+09         | 5.31.E+09         | 5.40.E+09         | 5.40.E+09         | 7.10.E+09            | 6.95.E+09            | 7.04.E+09            | 6.88.E+09            | 5.92.E+09            | 6.17.E+09            | 6.11.E+09            | 6.13.E+09            |
| 11   | P55072    | Transitional endoplasmic reticulum ATPase [OS=Homo sapiens]                | 1136.515      | 3.56.E+10         | 3.42.E+10         | 3.48.E+10         | 3.40.E+10         | 3.19.E+10            | 3.15.E+10            | 3.17.E+10            | 3.14.E+10            | 3.15.E+10            | 3.07.E+10            | 3.03.E+10            | 3.06.E+10            |
| 12   | P07900    | Heat shock protein HSP 90-alpha [OS=Homo sapiens]                          | 1115.679      | 4.95.E+10         | 5.12.E+10         | 5.00.E+10         | 4.93.E+10         | 4.62.E+10            | 4.62.E+10            | 4.78.E+10            | 4.72.E+10            | 5.46.E+10            | 5.31.E+10            | 5.27.E+10            | 5.13.E+10            |
| 13   | O43707    | Alpha-actinin-4 [OS=Homo sapiens]                                          | 1108.623      | 2.10.E+10         | 2.11.E+10         | 2.01.E+10         | 2.11.E+10         | 2.39.E+10            | 2.48.E+10            | 2.38.E+10            | 2.39.E+10            | 2.57.E+10            | 2.54.E+10            | 2.48.E+10            | 2.42.E+10            |
| 14   | P05783    | Keratin, type I cytoskeletal 18 [OS=Homo sapiens]                          | 1033.739      | 1.01.E+11         | 1.03.E+11         | 1.04.E+11         | 1.03.E+11         | 9.18.E+10            | 9.25.E+10            | 9.19.E+10            | 9.31.E+10            | 6.46.E+10            | 6.67.E+10            | 6.60.E+10            | 6.51.E+10            |
| 15   | P13639    | Elongation factor 2 [OS=Homo sapiens]                                      | 958.861       | 2.35.E+10         | 2.18.E+10         | 2.20.E+10         | 2.26.E+10         | 2.09.E+10            | 2.09.E+10            | 2.13.E+10            | 2.08.E+10            | 2.31.E+10            | 2.35.E+10            | 2.36.E+10            | 2.29.E+10            |
| 16   | P08238    | Heat shock protein HSP 90-beta [OS=Homo sapiens]                           | 931.123       | 1.56.E+10         | 1.58.E+10         | 1.60.E+10         | 1.57.E+10         | 1.43.E+10            | 1.45.E+10            | 1.43.E+10            | 1.48.E+10            | 1.53.E+10            | 1.52.E+10            | 1.52.E+10            | 1.55.E+10            |
| 17   | P14618    | Pyruvate kinase PKM [OS=Homo sapiens]                                      | 906.396       | 5.76.E+10         | 5.71.E+10         | 5.69.E+10         | 5.71.E+10         | 6.42.E+10            | 6.34.E+10            | 6.34.E+10            | 6.10.E+10            | 6.86.E+10            | 6.73.E+10            | 6.87.E+10            | 7.02.E+10            |
| 18   | Q01082-1  | Spectrin beta chain, non-erythrocytic 1 [OS=Homo sapiens]                  | 904.481       | 4.36.E+09         | 4.29.E+09         | 4.36.E+09         | 4.24.E+09         | 5.67.E+09            | 5.68.E+09            | 5.71.E+09            | 5.55.E+09            | 5.11.E+09            | 5.12.E+09            | 5.07.E+09            | 5.18.E+09            |
| 19   | P07355    | Annexin A2 [OS=Homo sapiens]                                               | 880.567       | 8.62.E+10         | 8.15.E+10         | 8.42.E+10         | 8.67.E+10         | 1.13.E+11            | 1.14.E+11            | 1.14.E+11            | 1.11.E+11            | 1.02.E+11            | 1.04.E+11            | 1.02.E+11            | 9.86.E+10            |
| 20   | Q00610-1  | Clathrin heavy chain 1 [OS=Homo sapiens]                                   | 877.809       | 6.58.E+09         | 6.65.E+09         | 6.35.E+09         | 6.76.E+09         | 7.23.E+09            | 6.90.E+09            | 6.82.E+09            | 6.57.E+09            | 7.42.E+09            | 7.48.E+09            | 7.43.E+09            | 7.46.E+09            |
| 21   | P46940    | Ras GTPase-activating-like protein IQGAP1 [OS=Homo sapiens]                | 827.007       | 4.70.E+09         | 4.40.E+09         | 4.38.E+09         | 4.47.E+09         | 5.48.E+09            | 5.55.E+09            | 5.49.E+09            | 5.27.E+09            | 5.37.E+09            | 5.15.E+09            | 5.04.E+09            | 4.99.E+09            |
| 22   | P06733-1  | alpha-enolase [OS=Homo sapiens]                                            | 807.888       | 5.69.E+10         | 5.80.E+10         | 5.84.E+10         | 5.95.E+10         | 5.67.E+10            | 5.71.E+10            | 5.69.E+10            | 5.64.E+10            | 6.66.E+10            | 6.70.E+10            | 6.68.E+10            | 6.81.E+10            |
| 23   | P21980    | Protein-glutamine gamma-glutamyltransferase 2 [OS=Homo sapiens]            | 800.757       | 2.94.E+10         | 2.77.E+10         | 2.82.E+10         | 2.91.E+10         | 2.58.E+10            | 2.59.E+10            | 2.61.E+10            | 2.61.E+10            | 3.67.E+10            | 3.62.E+10            | 3.59.E+10            | 3.67.E+10            |
| 24   | P63261    | Actin, cytoplasmic 2 [OS=Homo sapiens]                                     | 781.952       | 7.13.E+08         | 5.98.E+08         | 5.90.E+08         | 7.24.E+08         | 6.87.E+08            | 6.40.E+08            | 6.69.E+08            | 5.44.E+08            | 5.57.E+08            | 5.40.E+08            | 4.78.E+08            | 4.96.E+08            |
| 25   | P60709    | Actin, cytoplasmic 1 [OS=Homo sapiens]                                     | 781.952       | 1.49.E+11         | 1.50.E+11         | 1.55.E+11         | 1.48.E+11         | 1.58.E+11            | 1.59.E+11            | 1.60.E+11            | 1.64.E+11            | 1.53.E+11            | 1.54.E+11            | 1.56.E+11            | 1.57.E+11            |
| 26   | P12814-1  | Alpha-actinin-1 [OS=Homo sapiens]                                          | 766.604       | 3.98.E+09         | 4.05.E+09         | 4.06.E+09         | 3.96.E+09         | 4.90.E+09            | 4.79.E+09            | 4.80.E+09            | 4.81.E+09            | 5.56.E+09            | 5.34.E+09            | 5.24.E+09            | 5.27.E+09            |
| 27   | O75369-1  | Filamin-B [OS=Homo sapiens]                                                | 753.814       | 3.39.E+09         | 3.37.E+09         | 3.57.E+09         | 3.29.E+09         | 4.41.E+09            | 4.42.E+09            | 4.45.E+09            | 4.44.E+09            | 3.79.E+09            | 3.60.E+09            | 3.77.E+09            | 3.77.E+09            |
| 28   | Q9NZM1    | Myoferlin [OS=Homo sapiens]                                                | 735.613       | 6.19.E+09         | 6.12.E+09         | 6.12.E+09         | 6.02.E+09         | 6.78.E+09            | 6.81.E+09            | 6.81.E+09            | 6.92.E+09            | 5.32.E+09            | 5.44.E+09            | 5.40.E+09            | 5.13.E+09            |
| 29   | P78527    | DNA-dependent protein kinase catalytic subunit [OS=Homo sapiens]           | 724.531       | 3.01.E+09         | 2.90.E+09         | 2.93.E+09         | 3.01.E+09         | 3.01.E+09            | 3.06.E+09            | 3.06.E+09            | 3.00.E+09            | 3.08.E+09            | 3.07.E+09            | 3.03.E+09            | 3.05.E+09            |
| 30   | P22314    | Ubiquitin-like modifier-activating enzyme 1 [OS=Homo sapiens]              | 708.184       | 8.65.E+09         | 8.53.E+09         | 8.41.E+09         | 8.49.E+09         | 8.52.E+09            | 8.44.E+09            | 8.37.E+09            | 8.26.E+09            | 1.02.E+10            | 1.01.E+10            | 1.01.E+10            | 1.02.E+10            |
| 31   | P07437    | tubulin beta chain [OS=Homo sapiens]                                       | 706.15        | 7.74.E+09         | 7.88.E+09         | 8.09.E+09         | 7.96.E+09         | 7.91.E+09            | 7.86.E+09            | 8.01.E+09            | 7.68.E+09            | 8.76.E+09            | 8.96.E+09            | 9.19.E+09            | 9.53.E+09            |
| 32   | P10809    | 60 kDa heat shock protein, mitochondrial [OS=Homo sapiens]                 | 696.721       | 1.34.E+10         | 1.29.E+10         | 1.29.E+10         | 1.32.E+10         | 1.31.E+10            | 1.29.E+10            | 1.31.E+10            | 1.29.E+10            | 1.32.E+10            | 1.30.E+10            | 1.30.E+10            | 1.30.E+10            |
| 33   | P11142-1  | Heat shock cognate 71 kDa protein [OS=Homo sapiens]                        | 682.868       | 1.93.E+10         | 1.99.E+10         | 1.98.E+10         | 1.98.E+10         | 1.85.E+10            | 1.85.E+10            | 1.85.E+10            | 1.90.E+10            | 2.00.E+10            | 1.97.E+10            | 1.96.E+10            | 1.92.E+10            |
| 34   | P68371    | Tubulin beta-4B chain [OS=Homo sapiens]                                    | 678.241       | 4.00.E+10         | 3.75.E+10         | 3.81.E+10         | 3.91.E+10         | 3.80.E+10            | 3.76.E+10            | 3.74.E+10            | 3.44.E+10            | 4.08.E+10            | 4.04.E+10            | 4.10.E+10            | 4.12.E+10            |
| 35   | P29401    | Transketolase [OS=Homo sapiens]                                            | 671.875       | 1.46.E+10         | 1.40.E+10         | 1.31.E+10         | 1.40.E+10         | 1.35.E+10            | 1.32.E+10            | 1.31.E+10            | 1.30.E+10            | 1.49.E+10            | 1.46.E+10            | 1.44.E+10            | 1.40.E+10            |
| 36   | Q01082-3  | Isoform 2 of Spectrin beta chain, non-erythrocytic 1 [OS=Homo sapiens]     | 671.078       |                   |                   |                   |                   |                      |                      |                      |                      |                      |                      |                      |                      |
| 37   | P49588    | Alanine-tRNA ligase, cytoplasmic [OS=Homo sapiens]                         | 658.045       | 5.25.E+09         | 4.98.E+09         | 4.75.E+09         | 5.10.E+09         | 4.05.E+09            | 3.90.E+09            | 3.90.E+09            | 3.86.E+09            | 6.55.E+09            | 6.51.E+09            | 6.15.E+09            | 6.39.E+09            |
| 38   | P68104    | Elongation factor 1-alpha 1 [OS=Homo sapiens]                              | 656.703       | 4.81.E+10         | 4.70.E+10         | 4.73.E+10         | 4.64.E+10         | 4.97.E+10            | 4.94.E+10            | 4.96.E+10            | 5.06.E+10            | 5.61.E+10            | 5.69.E+10            | 5.66.E+10            | 5.74.E+10            |
| 39   | P42704    | Leucine-rich PPR motif-containing protein, mitochondrial [OS=Homo sapiens] | 645.073       | 3.58.E+09         | 3.39.E+09         | 3.65.E+09         | 3.39.E+09         | 3.29.E+09            | 3.44.E+09            | 3.41.E+09            | 3.37.E+09            | 3.73.E+09            | 3.49.E+09            | 3.51.E+09            | 3.51.E+09            |
| 40   | P13010    | X-ray repair cross-complementing protein 5 [OS=Homo sapiens]               | 639.416       | 8.02.E+09         | 7.60.E+09         | 7.61.E+09         | 7.50.E+09         | 7.31.E+09            | 7.19.E+09            | 7.29.E+09            | 7.16.E+09            | 8.09.E+09            | 7.99.E+09            | 8.07.E+09            | 7.95.E+09            |
| 41   | P02545    | Prelamin-A/C [OS=Homo sapiens]                                             | 635.272       | 1.29.E+10         | 1.33.E+10         | 1.36.E+10         | 1.34.E+10         | 1.61.E+10            | 1.64.E+10            | 1.64.E+10            | 1.68.E+10            | 1.48.E+10            | 1.61.E+10            | 1.58.E+10            | 1.56.E+10            |
| 42   | P04406-1  | glyceraldehyde-3-phosphate dehydrogenase [OS=Homo sapiens]                 | 621.516       | 7.35.E+10         | 7.30.E+10         | 7.19.E+10         | 7.20.E+10         | 5.52.E+10            | 5.57.E+10            | 5.57.E+10            | 5.73.E+10            | 5.83.E+10            | 5.74.E+10            | 5.84.E+10            | 5.73.E+10            |
| 43   | Q14697-1  | Neutral alpha-glucosidase AB [OS=Homo sapiens]                             | 603.926       | 7.21.E+09         | 6.99.E+09         | 7.02.E+09         | 6.83.E+09         | 6.74.E+09            | 6.54.E+09            | 6.59.E+09            | 6.61.E+09            | 6.07.E+09            | 6.00.E+09            | 5.81.E+09            | 5.82.E+09            |
| 44   | P07814    | Bifunctional glutamate/proline-tRNA ligase [OS=Homo sapiens]               | 585.987       | 3.54.E+09         | 3.51.E+09         | 3.43.E+09         | 3.54.E+09         | 3.02.E+09            | 3.11.E+09            | 2.91.E+09            | 2.78.E+09            | 3.14.E+09            | 3.05.E+09            | 3.03.E+09            | 3.17.E+09            |
| 45   | P07237    | Protein disulfide-isomerase [OS=Homo sapiens]                              | 579.975       | 1.82.E+10         | 1.79.E+10         | 1.83.E+10         | 1.84.E+10         | 2.01.E+10            | 1.96.E+10            | 1.98.E+10            | 2.06.E+10            | 1.40.E+10            | 1.38.E+10            | 1.41.E+10            | 1.44.E+10            |
| 46   | P11021    | 78 kDa glucose-regulated protein [OS=Homo sapiens]                         | 576.986       | 1.05.E+10         | 1.08.E+10         | 1.11.E+10         | 1.08.E+10         | 1.06.E+10            | 1.06.E+10            | 1.07.E+10            | 1.07.E+10            | 9.72.E+09            | 1.05.E+10            | 1.05.E+10            | 1.04.E+10            |
| 47   | O60701    | UDP-glucose 6-dehydrogenase [OS=Homo sapiens]                              | 571.381       | 6.93.E+09         | 6.35.E+09         | 6.42.E+09         | 6.70.E+09         | 7.70.E+09            | 7.71.E+09            | 7.84.E+09            | 7.70.E+09            | 7.70.E+09            | 7.42.E+09            | 7.29.E+09            | 7.56.E+09            |
| 48   | Q9BQE3    | Tubulin alpha-1C chain [OS=Homo sapiens]                                   | 555.927       | 2.84.E+10         | 2.83.E+10         | 2.85.E+10         | 2.85.E+10         | 2.89.E+10            | 2.68.E+10            | 2.89.E+10            | 2.84.E+10            | 3.48.E+10            | 3.41.E+10            | 3.38.E+10            | 3.49.E+10            |
| 49   | P71U36    | tubulin alpha-1A chain [OS=Homo sapiens]                                   | 552.922       | 1.64.E+09         | 1.59.E+09         | 1.67.E+09         | 1.50.E+09         | 1.36.E+09            | 1.40.E+09            | 1.43.E+09            | 1.15.E+09            | 1.65.E+09            | 1.64.E+09            | 1.73.E+09            | 1.78.E+09            |
| 50   | P00338-1  | L-lactate dehydrogenase A chain [OS=Homo sapiens]                          | 549.982       | 2.05.E+10         | 2.00.E+10         | 2.05.E+10         | 2.09.E+10         | 2.19.E+10            | 2.16.E+10            | 2.22.E+10            | 2.24.E+10            | 2.57.E+10            | 2.59.E+10            | 2.61.E+10            | 2.62.E+10            |
| 51   | P15311    | Ezrin [OS=Homo sapiens]                                                    | 542.299       | 1.26.E+10         | 1.26.E+10         | 1.26.E+10         | 1.26.E+10         | 1.25.E+10            | 1.23.E+10            | 1.23.E+10            | 1.22.E+10            | 1.31.E+10            | 1.26.E+10            | 1.28.E+10            | 1.28.E+10            |
| 52   | P14625    | Endoplasmic reticulum chaperone [OS=Homo sapiens]                          | 539.669       | 5.94.E+09         | 5.74.E+09         | 5.81.E+09         | 5.78.E+09         | 6.03.E+09            | 5.93.E+09            | 6.05.E+09            | 5.88.E+09            | 5.94.E+09            | 5.86.E+09            | 5.83.E+09            | 5.82.E+09            |
| 53   | P15924-1  | Desmoplakin [OS=Homo sapiens]                                              | 534.412       | 2.34.E+09         | 2.17.E+09         | 2.19.E+09         | 2.22.E+09         | 2.00.E+09            | 2.08.E+09            | 2.11.E+09            | 2.01.E+09            | 1.98.E+09            | 1.88.E+09            | 1.93.E+09            | 1.88.E+09            |
| 54   | P68366    | Tubulin alpha-4A chain [OS=Homo sapiens]                                   | 521.719       | 2.74.E+09         | 2.50.E+09         | 2.54.E+09         | 2.49.E+09         | 2.80.E+09            | 2.55.E+09            | 2.55.E+09            | 2.55.E+09            | 2.97.E+09            | 2.99.E+09            | 2.73.E+09            | 2.97.E+09            |
| 55   | P08729    | Keratin, type II cytoskeletal 7 [OS=Homo sapiens]                          | 515.405       | 1.80.E+10         | 1.83.E+10         | 1.82.E+10         | 1.84.E+10         | 1.46.E+10            | 1.47.E+10            | 1.43.E+10            | 1.41.E+10            | 1.49.E+10            | 1.54.E+10            | 1.54.E+10            | 1.56.E+10            |
| 56   | P04075    | fructose-bisphosphate aldolase A [OS=Homo sapiens]                         | 512.348       | 9.52.E+09         | 9.35.E+09         | 9.89.E+09         | 9.74.E+09         | 1.12.E+10            | 1.11.E+10            | 1.12.E+10            | 1.14.E+10            | 1.08.E+10            | 1.05.E+10            | 1.07.E+10            | 1.06.E+10            |
| 57   | P04083    | annexin A1 [OS=Homo sapiens]                                               | 507.841       | 1.56.E+10         | 1.50.E+10         | 1.47.E+10         | 1.53.E+10         | 1.80.E+10            | 1.80.E+10            | 1.79.E+10            | 1.79.E+10            | 1.98.E+10            | 1.98.E+10            | 1.93.E+10            | 1.98.E+10            |
| 58   | Q13509    | tubulin beta-3 chain [OS=Homo sapiens]                                     | 504.511       | 1.55.E+09         | 1.50.E+09         | 1.52.E+09         | 1.50.E+09         | 1.47.E+09            | 1.45.E+09            | 1.33.E+09            | 1.41.E+09            | 1.76.E+09            | 1.80.E+09            | 1.70.E+09            | 1.84.E+09            |
| 59</ |           |                                                                            |               |                   |                   |                   |                   |                      |                      |                      |                      |                      |                      |                      |                      |

Supplemental Data 1. List of identified proteins

| No. | Accession | Description                                                                                         | Sum PEP Score | CTRL Abundances_1 | CTRL Abundances_2 | CTRL Abundances_3 | CTRL Abundances_4 | CLDN6-1 Abundances_1 | CLDN6-1 Abundances_2 | CLDN6-1 Abundances_3 | CLDN6-1 Abundances_4 | CLDN6-2 Abundances_1 | CLDN6-2 Abundances_2 | CLDN6-2 Abundances_3 | CLDN6-2 Abundances_4 |
|-----|-----------|-----------------------------------------------------------------------------------------------------|---------------|-------------------|-------------------|-------------------|-------------------|----------------------|----------------------|----------------------|----------------------|----------------------|----------------------|----------------------|----------------------|
| 62  | Q00839    | Heterogeneous nuclear ribonucleoprotein U [OS=Homo sapiens]                                         | 484.621       | 8.70.E+09         | 8.71.E+09         | 8.79.E+09         | 8.75.E+09         | 7.78.E+09            | 7.90.E+09            | 7.67.E+09            | 7.49.E+09            | 8.82.E+09            | 8.74.E+09            | 9.11.E+09            | 8.53.E+09            |
| 63  | P06576    | ATP synthase subunit beta, mitochondrial [OS=Homo sapiens]                                          | 484.146       | 9.47.E+09         | 8.92.E+09         | 8.83.E+09         | 8.98.E+09         | 8.08.E+09            | 7.84.E+09            | 7.86.E+09            | 7.79.E+09            | 1.00.E+10            | 9.31.E+09            | 9.40.E+09            | 9.36.E+09            |
| 64  | P02538    | Keratin, type II cytoskeletal 6A [OS=Homo sapiens]                                                  | 482.142       | 3.48.E+09         | 3.28.E+09         | 3.32.E+09         | 3.34.E+09         | 1.10.E+10            | 1.11.E+10            | 1.10.E+10            | 1.05.E+10            | 1.63.E+09            | 1.48.E+09            | 1.81.E+09            | 1.44.E+09            |
| 65  | P11413-1  | Glucose-6-phosphate 1-dehydrogenase [OS=Homo sapiens]                                               | 479.137       | 9.07.E+09         | 8.61.E+09         | 9.33.E+09         | 8.90.E+09         | 1.12.E+10            | 1.15.E+10            | 1.12.E+10            | 1.08.E+10            | 8.80.E+09            | 9.19.E+09            | 9.33.E+09            | 8.91.E+09            |
| 66  | P09651-1  | Heterogeneous nuclear ribonucleoprotein A1 [OS=Homo sapiens]                                        | 473.584       | 6.40.E+09         | 6.26.E+09         | 6.60.E+09         | 6.83.E+09         | 5.86.E+09            | 6.11.E+09            | 6.14.E+09            | 5.83.E+09            | 6.82.E+09            | 6.90.E+09            | 6.91.E+09            | 6.85.E+09            |
| 67  | P02545-2  | Isoform C of Prelamin-A/C [OS=Homo sapiens]                                                         | 468.482       | 2.12.E+08         | 2.23.E+08         | 2.71.E+08         | 2.63.E+08         | 2.27.E+08            | 2.53.E+08            | 2.68.E+08            | 2.59.E+08            | 1.94.E+08            | 2.57.E+08            | 2.60.E+08            | 2.59.E+08            |
| 68  | Q08211    | ATP-dependent rna helicase a [OS=Homo sapiens]                                                      | 466.77        | 3.69.E+09         | 3.76.E+09         | 3.71.E+09         | 3.68.E+09         | 3.43.E+09            | 3.40.E+09            | 3.36.E+09            | 3.29.E+09            | 3.90.E+09            | 3.87.E+09            | 3.88.E+09            | 3.87.E+09            |
| 69  | P61978    | Heterogeneous nuclear ribonucleoprotein K [OS=Homo sapiens]                                         | 465.437       | 7.36.E+09         | 7.05.E+09         | 7.29.E+09         | 7.55.E+09         | 7.14.E+09            | 7.15.E+09            | 7.14.E+09            | 6.83.E+09            | 7.35.E+09            | 7.59.E+09            | 7.62.E+09            | 7.82.E+09            |
| 70  | Q16881-1  | Thioredoxin reductase 1, cytoplasmic [OS=Homo sapiens]                                              | 464.764       | 3.20.E+09         | 2.98.E+09         | 3.00.E+09         | 3.25.E+09         | 2.74.E+09            | 2.65.E+09            | 2.71.E+09            | 2.69.E+09            | 2.52.E+09            | 2.57.E+09            | 2.59.E+09            | 2.58.E+09            |
| 71  | P06744    | glucose-6-phosphate isomerase [OS=Homo sapiens]                                                     | 460.055       | 7.89.E+09         | 6.97.E+09         | 7.43.E+09         | 7.49.E+09         | 7.71.E+09            | 8.06.E+09            | 7.78.E+09            | 7.89.E+09            | 7.92.E+09            | 8.04.E+09            | 7.85.E+09            | 7.60.E+09            |
| 72  | P78371-1  | T-complex protein 1 subunit beta [OS=Homo sapiens]                                                  | 457.039       | 3.77.E+09         | 3.74.E+09         | 3.62.E+09         | 3.72.E+09         | 3.18.E+09            | 3.14.E+09            | 3.08.E+09            | 3.13.E+09            | 3.53.E+09            | 3.54.E+09            | 3.50.E+09            | 3.70.E+09            |
| 73  | P22234    | multifunctional protein ADE2 [OS=Homo sapiens]                                                      | 442.389       | 5.21.E+09         | 5.03.E+09         | 4.94.E+09         | 4.86.E+09         | 4.92.E+09            | 4.75.E+09            | 4.81.E+09            | 4.66.E+09            | 5.55.E+09            | 5.38.E+09            | 5.30.E+09            | 5.39.E+09            |
| 74  | P04259    | keratin, type II cytoskeletal 6B [OS=Homo sapiens]                                                  | 439.321       |                   |                   | 3.66.E+06         |                   | 1.25.E+08            | 1.31.E+08            | 1.23.E+08            | 1.23.E+08            | 5.54.E+06            | 3.92.E+06            | 1.78.E+06            | 1.22.E+06            |
| 75  | P12956    | X-ray repair cross-complementing protein 6 [OS=Homo sapiens]                                        | 428.748       | 5.74.E+09         | 5.63.E+09         | 5.45.E+09         | 5.49.E+09         | 5.35.E+09            | 5.29.E+09            | 5.20.E+09            | 5.19.E+09            | 5.99.E+09            | 5.75.E+09            | 5.83.E+09            | 5.66.E+09            |
| 76  | P08727    | Keratin, type I cytoskeletal 19 [OS=Homo sapiens]                                                   | 414.08        | 1.15.E+10         | 1.14.E+10         | 1.17.E+10         | 1.04.E+10         | 1.24.E+10            | 1.17.E+10            | 1.24.E+10            | 1.28.E+10            | 1.26.E+10            | 1.28.E+10            | 1.28.E+10            | 1.22.E+10            |
| 77  | P22626    | heterogeneous nuclear ribonucleoproteins A2/B1 [OS=Homo sapiens]                                    | 413.215       | 9.46.E+09         | 9.88.E+09         | 1.04.E+10         | 1.01.E+10         | 9.35.E+09            | 9.81.E+09            | 9.56.E+09            | 9.69.E+09            | 1.01.E+10            | 1.11.E+10            | 1.13.E+10            | 1.14.E+10            |
| 78  | P60842    | Eukaryotic initiation factor 4A-I [OS=Homo sapiens]                                                 | 410.851       | 8.00.E+09         | 7.79.E+09         | 7.81.E+09         | 8.26.E+09         | 8.20.E+09            | 8.03.E+09            | 8.03.E+09            | 8.28.E+09            | 6.83.E+09            | 6.83.E+09            | 6.92.E+09            | 6.72.E+09            |
| 79  | P27708    | CAD protein [OS=Homo sapiens]                                                                       | 400.116       | 2.01.E+09         | 1.94.E+09         | 1.91.E+09         | 2.03.E+09         | 1.86.E+09            | 1.86.E+09            | 1.87.E+09            | 1.96.E+09            | 2.10.E+09            | 2.07.E+09            | 2.06.E+09            | 2.08.E+09            |
| 80  | P38646    | Stress-70 protein, mitochondrial [OS=Homo sapiens]                                                  | 395.408       | 5.22.E+09         | 5.27.E+09         | 5.21.E+09         | 5.34.E+09         | 4.28.E+09            | 4.45.E+09            | 4.26.E+09            | 4.16.E+09            | 5.17.E+09            | 5.01.E+09            | 4.88.E+09            | 4.99.E+09            |
| 81  | P55060-1  | Exportin-2 [OS=Homo sapiens]                                                                        | 386.426       | 1.55.E+09         | 1.54.E+09         | 1.53.E+09         | 1.56.E+09         | 1.73.E+09            | 1.72.E+09            | 1.67.E+09            | 1.70.E+09            | 1.74.E+09            | 1.78.E+09            | 1.72.E+09            | 1.72.E+09            |
| 82  | P23528    | Cofilin-1 [OS=Homo sapiens]                                                                         | 386.029       | 1.88.E+10         | 1.91.E+10         | 1.91.E+10         | 1.91.E+10         | 1.90.E+10            | 1.92.E+10            | 1.83.E+10            | 1.91.E+10            | 2.15.E+10            | 2.13.E+10            | 2.07.E+10            | 2.08.E+10            |
| 83  | Q05639    | Elongation factor 1-alpha 2 [OS=Homo sapiens]                                                       | 384.763       | 9.76.E+08         | 7.14.E+08         | 8.19.E+08         | 6.72.E+08         | 1.60.E+09            | 1.46.E+09            | 1.54.E+09            | 1.45.E+09            | 1.57.E+09            | 1.57.E+09            | 1.68.E+09            | 1.70.E+09            |
| 84  | P43490    | nicotinamide phosphoribosyltransferase [OS=Homo sapiens]                                            | 384.254       | 3.59.E+09         | 3.61.E+09         | 3.57.E+09         | 3.53.E+09         | 6.94.E+09            | 6.65.E+09            | 6.75.E+09            | 6.84.E+09            | 2.68.E+09            | 2.66.E+09            | 2.62.E+09            | 2.55.E+09            |
| 85  | Q72627    | E3 ubiquitin-protein ligase HUWE1 [OS=Homo sapiens]                                                 | 382.77        | 1.01.E+09         | 8.93.E+08         | 1.05.E+09         | 9.35.E+08         | 9.42.E+08            | 1.01.E+09            | 9.92.E+08            | 9.51.E+08            | 1.04.E+09            | 1.07.E+09            | 1.09.E+09            | 1.07.E+09            |
| 86  | P18669    | Phosphoglycerate mutase 1 [OS=Homo sapiens]                                                         | 382.347       | 5.29.E+09         | 5.08.E+09         | 5.02.E+09         | 5.27.E+09         | 5.55.E+09            | 5.51.E+09            | 5.39.E+09            | 5.35.E+09            | 6.60.E+09            | 6.28.E+09            | 6.44.E+09            | 6.35.E+09            |
| 87  | P31947-1  | 14-3-3 protein sigma [OS=Homo sapiens]                                                              | 380.823       | 7.63.E+09         | 7.00.E+09         | 7.33.E+09         | 7.38.E+09         | 9.12.E+09            | 8.91.E+09            | 8.89.E+09            | 8.63.E+09            | 7.81.E+09            | 7.87.E+09            | 7.87.E+09            | 7.79.E+09            |
| 88  | Q04637    | eukaryotic translation initiation factor 4 gamma 1 [OS=Homo sapiens]                                | 378.716       | 1.98.E+09         | 1.98.E+09         | 2.05.E+09         | 2.08.E+09         | 2.16.E+09            | 2.18.E+09            | 2.15.E+09            | 2.23.E+09            | 2.21.E+09            | 2.31.E+09            | 2.28.E+09            | 2.33.E+09            |
| 89  | P60174    | Triosephosphate isomerase [OS=Homo sapiens]                                                         | 378.679       | 8.80.E+09         | 8.96.E+09         | 8.94.E+09         | 9.20.E+09         | 8.24.E+09            | 8.20.E+09            | 8.32.E+09            | 8.41.E+09            | 9.38.E+09            | 9.29.E+09            | 9.46.E+09            | 9.95.E+09            |
| 90  | P35221    | Catenin alpha-1 [OS=Homo sapiens]                                                                   | 378.265       | 1.57.E+09         | 1.82.E+09         | 1.60.E+09         | 1.57.E+09         | 1.54.E+09            | 1.90.E+09            | 1.67.E+09            | 1.58.E+09            | 2.13.E+09            | 1.81.E+09            | 1.85.E+09            | 2.06.E+09            |
| 91  | P00558    | phosphoglycerate kinase 1 [OS=Homo sapiens]                                                         | 378.154       | 4.89.E+09         | 4.71.E+09         | 4.91.E+09         | 4.99.E+09         | 4.99.E+09            | 4.83.E+09            | 4.88.E+09            | 4.95.E+09            | 5.30.E+09            | 5.18.E+09            | 5.10.E+09            | 5.49.E+09            |
| 92  | P06748    | Nucleophosmin [OS=Homo sapiens]                                                                     | 378.037       | 5.74.E+09         | 5.38.E+09         | 5.73.E+09         | 6.13.E+09         | 5.14.E+09            | 5.33.E+09            | 5.29.E+09            | 4.94.E+09            | 5.18.E+09            | 5.94.E+09            | 6.06.E+09            | 6.00.E+09            |
| 93  | Q14974    | Importin subunit beta-1 [OS=Homo sapiens]                                                           | 376.631       | 2.34.E+09         | 2.06.E+09         | 2.13.E+09         | 2.25.E+09         | 2.33.E+09            | 2.28.E+09            | 2.26.E+09            | 2.22.E+09            | 2.26.E+09            | 2.30.E+09            | 2.44.E+09            | 2.27.E+09            |
| 94  | P26038    | Moesin [OS=Homo sapiens]                                                                            | 375.804       | 1.41.E+09         | 1.33.E+09         | 1.36.E+09         | 1.38.E+09         | 1.85.E+09            | 1.83.E+09            | 1.76.E+09            | 1.78.E+09            | 1.51.E+09            | 1.49.E+09            | 1.57.E+09            | 1.55.E+09            |
| 95  | P31948    | stress-induced-phosphoprotein 1 [OS=Homo sapiens]                                                   | 374.43        | 3.11.E+09         | 3.10.E+09         | 3.12.E+09         | 3.26.E+09         | 2.85.E+09            | 2.88.E+09            | 2.86.E+09            | 2.88.E+09            | 3.26.E+09            | 3.26.E+09            | 3.32.E+09            | 3.24.E+09            |
| 96  | P0DMV8    | heat shock 70 kDa protein 1A [OS=Homo sapiens]                                                      | 373.756       | 3.11.E+09         | 3.21.E+09         | 3.36.E+09         | 3.27.E+09         | 3.93.E+09            | 4.09.E+09            | 4.18.E+09            | 4.08.E+09            | 3.31.E+09            | 2.87.E+09            | 3.14.E+09            | 3.09.E+09            |
| 97  | P63241-1  | Eukaryotic translation initiation factor 5A-1 [OS=Homo sapiens]                                     | 373.646       | 6.23.E+09         | 6.24.E+09         | 6.29.E+09         | 5.88.E+09         | 6.43.E+09            | 6.28.E+09            | 6.33.E+09            | 6.34.E+09            | 4.77.E+09            | 4.60.E+09            | 4.72.E+09            | 4.69.E+09            |
| 98  | Q06830    | peroxiredoxin-1 [OS=Homo sapiens]                                                                   | 371.605       | 2.43.E+10         | 2.49.E+10         | 2.49.E+10         | 2.44.E+10         | 2.25.E+10            | 2.23.E+10            | 2.28.E+10            | 2.32.E+10            | 2.55.E+10            | 2.57.E+10            | 2.58.E+10            | 2.56.E+10            |
| 99  | P06753-2  | Isoform 2 of Tropomyosin alpha-3 chain [OS=Homo sapiens]                                            | 370.573       | 6.60.E+09         | 6.65.E+09         | 6.63.E+09         | 6.64.E+09         | 6.75.E+09            | 6.61.E+09            | 6.65.E+09            | 6.85.E+09            | 6.84.E+09            | 6.47.E+09            | 6.57.E+09            | 6.38.E+09            |
| 100 | P26640    | Valine--tRNA ligase [OS=Homo sapiens]                                                               | 369.95        | 1.49.E+09         | 1.43.E+09         | 1.62.E+09         | 1.61.E+09         | 1.69.E+09            | 1.65.E+09            | 1.57.E+09            | 1.65.E+09            | 1.84.E+09            | 1.78.E+09            | 1.64.E+09            | 1.61.E+09            |
| 101 | P52895    | Aldo-keto reductase family 1 member C2 [OS=Homo sapiens]                                            | 369.436       | 1.40.E+09         | 1.34.E+09         | 1.41.E+09         | 1.32.E+09         | 5.94.E+09            | 5.74.E+09            | 6.31.E+09            | 6.36.E+09            | 2.43.E+09            | 2.58.E+09            | 2.58.E+09            | 2.53.E+09            |
| 102 | O00151    | PDZ and LIM domain protein 1 [OS=Homo sapiens]                                                      | 369.285       | 2.83.E+09         | 2.91.E+09         | 2.93.E+09         | 2.87.E+09         | 3.56.E+09            | 3.62.E+09            | 3.64.E+09            | 3.62.E+09            | 3.37.E+09            | 3.36.E+09            | 3.30.E+09            | 3.33.E+09            |
| 103 | P27797    | Calreticulin [OS=Homo sapiens]                                                                      | 367.23        | 3.96.E+09         | 4.10.E+09         | 4.00.E+09         | 4.06.E+09         | 3.98.E+09            | 3.93.E+09            | 3.96.E+09            | 3.87.E+09            | 4.45.E+09            | 4.67.E+09            | 4.45.E+09            | 4.47.E+09            |
| 104 | P11586    | C-1-tetrahydrofolate synthase, cytoplasmic [OS=Homo sapiens]                                        | 367.217       | 3.63.E+09         | 3.62.E+09         | 3.75.E+09         | 3.83.E+09         | 3.42.E+09            | 3.58.E+09            | 3.52.E+09            | 3.59.E+09            | 3.98.E+09            | 4.42.E+09            | 4.50.E+09            | 4.49.E+09            |
| 105 | P07195    | L-lactate dehydrogenase B chain [OS=Homo sapiens]                                                   | 364.942       | 7.29.E+09         | 7.20.E+09         | 7.39.E+09         | 7.56.E+09         | 7.55.E+09            | 7.54.E+09            | 7.65.E+09            | 7.78.E+09            | 7.29.E+09            | 7.46.E+09            | 7.47.E+09            | 7.52.E+09            |
| 106 | P36578    | 60S ribosomal protein L4 [OS=Homo sapiens]                                                          | 364.569       | 6.08.E+09         | 6.33.E+09         | 6.23.E+09         | 6.03.E+09         | 5.46.E+09            | 5.51.E+09            | 5.50.E+09            | 5.54.E+09            | 6.08.E+09            | 5.93.E+09            | 5.93.E+09            | 5.93.E+09            |
| 107 | P13797    | Plastin-3 [OS=Homo sapiens]                                                                         | 363.405       | 3.36.E+09         | 3.37.E+09         | 3.32.E+09         | 3.26.E+09         | 3.01.E+09            | 2.93.E+09            | 2.90.E+09            | 2.91.E+09            | 3.61.E+09            | 3.63.E+09            | 3.54.E+09            | 3.57.E+09            |
| 108 | P67936    | Tropomyosin alpha-4 chain [OS=Homo sapiens]                                                         | 362.61        | 1.04.E+09         | 1.05.E+09         | 1.04.E+09         | 8.73.E+08         | 1.49.E+09            | 1.51.E+09            | 1.48.E+09            | 1.51.E+09            | 1.26.E+09            | 1.24.E+09            | 1.24.E+09            | 1.21.E+09            |
| 109 | P09936    | Ubiquitin carboxyl-terminal hydrolase isozyme L1 [OS=Homo sapiens]                                  | 354.571       | 6.11.E+09         | 6.17.E+09         | 6.22.E+09         | 5.93.E+09         | 7.66.E+09            | 7.74.E+09            | 7.49.E+09            | 7.81.E+09            | 6.54.E+09            | 6.74.E+09            | 6.75.E+09            | 6.69.E+09            |
| 110 | P18206    | Vinculin [OS=Homo sapiens]                                                                          | 352.71        | 1.25.E+09         | 1.22.E+09         | 1.30.E+09         | 1.16.E+09         | 1.56.E+09            | 1.62.E+09            | 1.58.E+09            | 1.65.E+09            | 1.84.E+09            | 1.89.E+09            | 1.91.E+09            | 1.86.E+09            |
| 111 | Q01813    | ATP-dependent 6-phosphofructokinase, platelet type [OS=Homo sapiens]                                | 352.275       | 3.28.E+09         | 3.30.E+09         | 3.08.E+09         | 3.21.E+09         | 3.26.E+09            | 3.24.E+09            | 3.15.E+09            | 3.04.E+09            | 3.20.E+09            | 2.96.E+09            | 3.13.E+09            | 3.09.E+09            |
| 112 | P41250    | Glycine--tRNA ligase [OS=Homo sapiens]                                                              | 350.598       | 2.49.E+09         | 2.42.E+09         | 2.36.E+09         | 2.42.E+09         | 2.49.E+09            | 2.30.E+09            | 2.31.E+09            | 2.19.E+09            | 2.05.E+09            | 2.02.E+09            | 1.96.E+09            | 1.96.E+09            |
| 113 | Q06210-1  | glutamine-fructose-6-phosphate aminotransferase [isomerizing] 1 [OS=Homo sapiens]                   | 350.553       | 2.43.E+09         | 2.43.E+09         | 2.48.E+09         | 2.35.E+09         | 2.54.E+09            | 2.59.E+09            | 2.55.E+09            | 2.58.E+09            | 2.05.E+09            | 2.07.E+09            | 2.04.E+09            | 1.95.E+09            |
| 114 | P62258-1  | 14-3-3 protein epsilon [OS=Homo sapiens]                                                            | 348.238       | 1.31.E+10         | 1.22.E+10         | 1.19.E+10         | 1.33.E+10         | 1.39.E+10            | 1.36.E+10            | 1.38.E+10            | 1.29.E+10            | 1.23.E+10            | 1.12.E+10            | 1.19.E+10            | 1.19.E+10            |
| 115 | P08758    | annexin A5 [OS=Homo sapiens]                                                                        | 345.587       | 5.05.E+09         | 4.48.E+09         | 4.59.E+09         | 4.89.E+09         | 6.53.E+09            | 6.31.E+09            | 6.43.E+09            | 6.23.E+09            | 6.25.E+09            | 6.22.E+09            | 5.89.E+09            | 5.99.E+09            |
| 116 | P30153    | serine/threonine-protein phosphatase 2A 65 kDa regulatory subunit A alpha isoform [OS=Homo sapiens] | 344.657       | 2.05.E+09         | 1.88.E+09         | 1.92.E+09         | 1.87.E+09         | 2.07.E+09            | 2.10.E+09            | 1.90.E+09            | 1.91.E+09            | 2.11.E+09            | 2.03.E+09            | 1.99.E+09            | 2.09.E+09            |
| 117 | P08195    | 4F2 cell-surface antigen heavy chain [OS=Homo sapiens]                                              | 341.551       | 9.38.E+09         | 9.18.E+09         | 8.88.E+09         | 9.26.E+09         | 8.22.E+09            | 8.16.E+09            | 7.91.E+09            | 7.97.E+09            | 6.64.E+09            | 6.39.E+09            | 6.25.E+09            | 6.23.E+09            |
| 118 | P51991-1  | Heterogeneous nuclear ribonucleoprotein A3 [OS=Homo sapiens]                                        | 340.878       | 2.51.E+09         | 2.71.E+09         | 2.63.E+09         | 2.57.E+09         | 2.63.E+09            | 2.59.E+09            | 2.51.E+09            | 2.45.E+09            | 3.06.E+09            | 2.86.E+09            | 2.83.E+09            | 2.93.E+09            |
| 119 | P48643    | T-complex protein 1 subunit epsilon [OS=Homo sapiens]                                               | 339.679       | 2.79.E+09         | 2.7               |                   |                   |                      |                      |                      |                      |                      |                      |                      |                      |

| No. | Accession | Description                                                              | Sum PEP Score | CTRL Abundances_1 | CTRL Abundances_2 | CTRL Abundances_3 | CTRL Abundances_4 | CLDN6-1 Abundances_1 | CLDN6-1 Abundances_2 | CLDN6-1 Abundances_3 | CLDN6-1 Abundances_4 | CLDN6-2 Abundances_1 | CLDN6-2 Abundances_2 | CLDN6-2 Abundances_3 | CLDN6-2 Abundances_4 |
|-----|-----------|--------------------------------------------------------------------------|---------------|-------------------|-------------------|-------------------|-------------------|----------------------|----------------------|----------------------|----------------------|----------------------|----------------------|----------------------|----------------------|
| 121 | P25705-1  | ATP synthase subunit alpha, mitochondrial [OS=Homo sapiens]              | 335.09        | 8.37.E+09         | 8.26.E+09         | 8.08.E+09         | 7.98.E+09         | 7.46.E+09            | 6.60.E+09            | 6.58.E+09            | 7.43.E+09            | 8.81.E+09            | 7.56.E+09            | 8.60.E+09            | 8.63.E+09            |
| 122 | P12429    | annexin A3 [OS=Homo sapiens]                                             | 334.888       | 6.55.E+09         | 6.56.E+09         | 6.55.E+09         | 6.49.E+09         | 1.00.E+10            | 1.02.E+10            | 1.01.E+10            | 1.01.E+10            | 7.94.E+09            | 7.91.E+09            | 7.83.E+09            | 7.76.E+09            |
| 123 | Q99832    | T-complex protein 1 subunit eta [OS=Homo sapiens]                        | 334.855       | 3.32.E+09         | 3.20.E+09         | 3.21.E+09         | 3.06.E+09         | 2.87.E+09            | 2.75.E+09            | 2.84.E+09            | 2.75.E+09            | 3.09.E+09            | 2.94.E+09            | 3.00.E+09            | 2.95.E+09            |
| 124 | P35241-1  | radixin [OS=Homo sapiens]                                                | 334.541       | 8.39.E+08         | 7.49.E+08         | 8.09.E+08         | 8.13.E+08         | 1.02.E+09            | 1.02.E+09            | 1.06.E+09            | 1.06.E+09            | 7.56.E+08            | 7.75.E+08            | 7.87.E+08            | 7.92.E+08            |
| 125 | P23381    | Tryptophan--tRNA ligase, cytoplasmic [OS=Homo sapiens]                   | 333.518       | 2.89.E+09         | 2.75.E+09         | 2.88.E+09         | 2.91.E+09         | 2.85.E+09            | 2.76.E+09            | 2.76.E+09            | 2.65.E+09            | 2.28.E+09            | 2.22.E+09            | 2.27.E+09            | 2.39.E+09            |
| 126 | Q9UQ80    | proliferation-associated protein 2G4 [OS=Homo sapiens]                   | 331.235       | 3.92.E+09         | 3.93.E+09         | 3.94.E+09         | 3.81.E+09         | 3.50.E+09            | 3.54.E+09            | 3.54.E+09            | 3.64.E+09            | 3.94.E+09            | 3.89.E+09            | 3.96.E+09            | 3.82.E+09            |
| 127 | Q13200    | 26S proteasome non-ATPase regulatory subunit 2 [OS=Homo sapiens]         | 330.306       | 1.17.E+09         | 1.16.E+09         | 1.20.E+09         | 1.18.E+09         | 1.27.E+09            | 1.22.E+09            | 1.24.E+09            | 1.30.E+09            | 1.48.E+09            | 1.51.E+09            | 1.44.E+09            | 1.44.E+09            |
| 128 | P41252    | isoleucine--tRNA ligase, cytoplasmic [OS=Homo sapiens]                   | 329.971       | 1.81.E+09         | 1.76.E+09         | 1.76.E+09         | 1.79.E+09         | 1.55.E+09            | 1.46.E+09            | 1.53.E+09            | 1.57.E+09            | 1.72.E+09            | 1.71.E+09            | 1.70.E+09            | 1.79.E+09            |
| 129 | P35580    | Myosin-10 [OS=Homo sapiens]                                              | 327.759       | 4.97.E+08         | 4.33.E+08         | 4.67.E+08         | 4.73.E+08         | 4.01.E+08            | 3.64.E+08            | 4.18.E+08            | 3.93.E+08            | 3.58.E+08            | 3.36.E+08            | 2.90.E+08            | 2.99.E+08            |
| 130 | O43175    | D-3-phosphoglycerate dehydrogenase [OS=Homo sapiens]                     | 326.931       | 4.83.E+09         | 4.84.E+09         | 4.86.E+09         | 5.08.E+09         | 4.84.E+09            | 5.06.E+09            | 4.91.E+09            | 4.94.E+09            | 4.17.E+09            | 4.22.E+09            | 4.06.E+09            | 4.19.E+09            |
| 131 | Q04828    | aldo-keto reductase family 1 member C1 [OS=Homo sapiens]                 | 326.645       | 3.17.E+09         | 3.11.E+09         | 3.19.E+09         | 3.11.E+09         | 1.31.E+10            | 1.34.E+10            | 1.32.E+10            | 1.35.E+10            | 4.86.E+09            | 5.33.E+09            | 5.21.E+09            | 5.30.E+09            |
| 132 | P09429    | High mobility group protein B1 [OS=Homo sapiens]                         | 325.584       | 5.05.E+09         | 5.36.E+09         | 5.50.E+09         | 5.38.E+09         | 5.00.E+09            | 5.07.E+09            | 4.96.E+09            | 5.07.E+09            | 4.99.E+09            | 5.41.E+09            | 5.36.E+09            | 5.22.E+09            |
| 133 | P61978-3  | Isoform 3 of Heterogeneous nuclear ribonucleoprotein K [OS=Homo sapiens] | 323.641       | 2.36.E+07         | 2.33.E+07         | 2.18.E+07         | 2.35.E+07         | 2.61.E+07            | 2.25.E+07            | 2.62.E+07            | 2.64.E+07            | 3.07.E+07            | 3.04.E+07            | 3.24.E+07            | 2.88.E+07            |
| 134 | P37802    | Transgelin-2 [OS=Homo sapiens]                                           | 314.782       | 9.78.E+09         | 9.37.E+09         | 9.47.E+09         | 9.08.E+09         | 1.02.E+10            | 1.02.E+10            | 1.02.E+10            | 9.86.E+09            | 1.02.E+10            | 1.01.E+10            | 1.03.E+10            | 1.00.E+10            |
| 135 | P50991    | T-complex protein 1 subunit delta [OS=Homo sapiens]                      | 313.174       | 3.72.E+09         | 2.99.E+09         | 3.05.E+09         | 3.20.E+09         | 2.72.E+09            | 2.79.E+09            | 3.16.E+09            | 3.15.E+09            | 3.56.E+09            | 2.77.E+09            | 2.77.E+09            | 3.39.E+09            |
| 136 | P63104-1  | 14-3-3 protein zeta/delta [OS=Homo sapiens]                              | 311.479       | 5.57.E+09         | 5.55.E+09         | 5.36.E+09         | 5.56.E+09         | 5.97.E+09            | 5.97.E+09            | 5.67.E+09            | 5.80.E+09            | 5.80.E+09            | 5.82.E+09            | 5.98.E+09            | 5.89.E+09            |
| 137 | Q81VF2-1  | Protein AHNAK2 [OS=Homo sapiens]                                         | 309.767       | 1.33.E+09         | 1.35.E+09         | 1.40.E+09         | 1.37.E+09         | 1.74.E+09            | 1.72.E+09            | 1.70.E+09            | 1.81.E+09            | 2.03.E+09            | 1.97.E+09            | 2.07.E+09            | 2.05.E+09            |
| 138 | P36871-1  | Phosphoglucomutase-1 [OS=Homo sapiens]                                   | 307.759       | 1.52.E+09         | 1.48.E+09         | 1.37.E+09         | 1.31.E+09         | 1.38.E+09            | 1.32.E+09            | 1.34.E+09            | 1.42.E+09            | 1.69.E+09            | 1.63.E+09            | 1.68.E+09            | 1.63.E+09            |
| 139 | P26639-1  | Threonine--tRNA ligase, cytoplasmic [OS=Homo sapiens]                    | 304.457       | 3.50.E+09         | 3.46.E+09         | 3.46.E+09         | 3.50.E+09         | 3.65.E+09            | 3.65.E+09            | 3.61.E+09            | 3.60.E+09            | 2.98.E+09            | 2.94.E+09            | 2.82.E+09            | 2.91.E+09            |
| 140 | P17987    | T-complex protein 1 subunit alpha [OS=Homo sapiens]                      | 304.174       | 2.92.E+09         | 2.49.E+09         | 2.51.E+09         | 2.63.E+09         | 2.48.E+09            | 2.47.E+09            | 2.46.E+09            | 2.47.E+09            | 2.57.E+09            | 2.52.E+09            | 2.63.E+09            | 2.59.E+09            |
| 141 | P09211    | Glutathione S-transferase P [OS=Homo sapiens]                            | 302.797       | 2.79.E+10         | 2.87.E+10         | 2.94.E+10         | 2.99.E+10         | 2.53.E+10            | 2.67.E+10            | 2.67.E+10            | 2.53.E+10            | 2.66.E+10            | 2.63.E+10            | 2.68.E+10            | 2.75.E+10            |
| 142 | P14866    | Heterogeneous nuclear ribonucleoprotein L [OS=Homo sapiens]              | 301.711       | 1.39.E+09         | 1.40.E+09         | 1.27.E+09         | 1.24.E+09         | 1.27.E+09            | 1.24.E+09            | 1.10.E+09            | 1.13.E+09            | 1.42.E+09            | 1.36.E+09            | 1.38.E+09            | 1.41.E+09            |
| 143 | P62701    | 40S ribosomal protein S4, X isoform [OS=Homo sapiens]                    | 299.756       | 6.97.E+09         | 7.14.E+09         | 7.06.E+09         | 7.52.E+09         | 6.86.E+09            | 6.81.E+09            | 6.63.E+09            | 6.92.E+09            | 6.40.E+09            | 6.23.E+09            | 6.17.E+09            | 6.22.E+09            |
| 144 | Q9UJ21    | Stomatin-like protein 2, mitochondrial [OS=Homo sapiens]                 | 299.107       | 2.76.E+09         | 2.56.E+09         | 2.68.E+09         | 2.67.E+09         | 2.36.E+09            | 2.40.E+09            | 2.31.E+09            | 2.24.E+09            | 2.37.E+09            | 2.46.E+09            | 2.46.E+09            | 2.46.E+09            |
| 145 | P49411    | elongation factor Tu, mitochondrial [OS=Homo sapiens]                    | 298.927       | 2.07.E+09         | 1.92.E+09         | 1.81.E+09         | 2.16.E+09         | 1.84.E+09            | 1.77.E+09            | 1.61.E+09            | 1.74.E+09            | 1.83.E+09            | 1.80.E+09            | 1.78.E+09            | 1.79.E+09            |
| 146 | P26599    | Polypyrimidine tract-binding protein 1 [OS=Homo sapiens]                 | 296.646       | 3.06.E+09         | 2.93.E+09         | 2.87.E+09         | 3.09.E+09         | 2.83.E+09            | 2.55.E+09            | 2.49.E+09            | 2.56.E+09            | 2.97.E+09            | 2.88.E+09            | 2.81.E+09            | 2.98.E+09            |
| 147 | P05455    | Lupus La protein [OS=Homo sapiens]                                       | 296.222       | 2.29.E+09         | 2.16.E+09         | 2.15.E+09         | 2.29.E+09         | 2.10.E+09            | 2.05.E+09            | 2.09.E+09            | 2.02.E+09            | 2.34.E+09            | 2.39.E+09            | 2.28.E+09            | 2.29.E+09            |
| 148 | Q86VP6-1  | cullin-associated nedd8-dissociated protein 1 [OS=Homo sapiens]          | 295.999       | 1.47.E+09         | 1.23.E+09         | 1.28.E+09         | 1.40.E+09         | 1.50.E+09            | 1.53.E+09            | 1.49.E+09            | 1.39.E+09            | 1.44.E+09            | 1.41.E+09            | 1.52.E+09            | 1.42.E+09            |
| 149 | P13489    | Ribonuclease inhibitor [OS=Homo sapiens]                                 | 294.862       | 2.75.E+09         | 2.43.E+09         | 2.57.E+09         | 2.59.E+09         | 2.73.E+09            | 2.81.E+09            | 2.75.E+09            | 2.66.E+09            | 3.09.E+09            | 3.17.E+09            | 2.98.E+09            | 3.25.E+09            |
| 150 | P26641    | elongation factor 1-gamma [OS=Homo sapiens]                              | 293.78        | 1.09.E+10         | 1.05.E+10         | 1.11.E+10         | 1.13.E+10         | 9.51.E+09            | 1.02.E+10            | 1.00.E+10            | 1.01.E+10            | 1.20.E+10            | 1.20.E+10            | 1.20.E+10            | 1.21.E+10            |
| 151 | P09874    | Poly [ADP-ribose] polymerase 1 [OS=Homo sapiens]                         | 292.859       | 2.05.E+09         | 2.07.E+09         | 2.12.E+09         | 2.07.E+09         | 2.19.E+09            | 2.21.E+09            | 2.25.E+09            | 2.24.E+09            | 2.11.E+09            | 2.09.E+09            | 2.19.E+09            | 2.13.E+09            |
| 152 | P50990    | T-complex protein 1 subunit theta [OS=Homo sapiens]                      | 292.102       | 3.82.E+09         | 4.00.E+09         | 3.94.E+09         | 3.92.E+09         | 3.44.E+09            | 3.47.E+09            | 3.51.E+09            | 3.51.E+09            | 3.75.E+09            | 3.79.E+09            | 3.76.E+09            | 3.87.E+09            |
| 153 | Q13501-1  | sequestosome-1 [OS=Homo sapiens]                                         | 291.706       | 1.59.E+09         | 1.60.E+09         | 1.44.E+09         | 1.41.E+09         | 1.96.E+09            | 2.00.E+09            | 2.04.E+09            | 2.00.E+09            | 8.56.E+08            | 6.66.E+08            | 6.96.E+08            | 6.71.E+08            |
| 154 | P27695    | DNA-(apurinic or apyrimidinic site) lyase [OS=Homo sapiens]              | 291.38        | 2.58.E+09         | 2.37.E+09         | 2.40.E+09         | 2.48.E+09         | 2.06.E+09            | 2.02.E+09            | 2.02.E+09            | 1.82.E+09            | 2.37.E+09            | 2.39.E+09            | 2.34.E+09            | 2.32.E+09            |
| 155 | P12268    | inosine-5'-monophosphate dehydrogenase 2 [OS=Homo sapiens]               | 291.146       | 2.09.E+09         | 2.23.E+09         | 2.20.E+09         | 2.11.E+09         | 1.61.E+09            | 1.54.E+09            | 1.58.E+09            | 1.57.E+09            | 2.49.E+09            | 2.42.E+09            | 2.40.E+09            | 2.38.E+09            |
| 156 | P35222    | Catenin beta-1 [OS=Homo sapiens]                                         | 291.064       | 2.07.E+09         | 1.92.E+09         | 2.04.E+09         | 1.90.E+09         | 2.18.E+09            | 2.09.E+09            | 1.98.E+09            | 2.13.E+09            | 2.53.E+09            | 2.41.E+09            | 2.35.E+09            | 2.46.E+09            |
| 157 | Q72406-2  | Isoform 2 of Myosin-14 [OS=Homo sapiens]                                 | 290.427       | 8.60.E+08         | 1.00.E+09         | 1.03.E+09         | 1.04.E+09         | 7.53.E+08            | 8.05.E+08            | 8.43.E+08            | 8.08.E+08            | 7.14.E+08            | 7.04.E+08            | 6.77.E+08            | 6.96.E+08            |
| 158 | P48506    | glutamate--cysteine ligase catalytic subunit [OS=Homo sapiens]           | 290.261       | 1.54.E+09         | 1.46.E+09         | 1.46.E+09         | 1.47.E+09         | 1.51.E+09            | 1.48.E+09            | 1.32.E+09            | 1.40.E+09            | 1.64.E+09            | 1.55.E+09            | 1.48.E+09            | 1.46.E+09            |
| 159 | P34897-1  | Serine hydroxymethyltransferase, mitochondrial [OS=Homo sapiens]         | 290.045       | 3.63.E+09         | 3.55.E+09         | 3.50.E+09         | 3.47.E+09         | 3.38.E+09            | 3.42.E+09            | 3.36.E+09            | 3.23.E+09            | 3.16.E+09            | 3.00.E+09            | 3.05.E+09            | 3.04.E+09            |
| 160 | P62805    | histone H4 [OS=Homo sapiens]                                             | 289.563       | 8.14.E+10         | 8.38.E+10         | 8.27.E+10         | 8.16.E+10         | 6.97.E+10            | 6.98.E+10            | 7.07.E+10            | 7.28.E+10            | 7.82.E+10            | 7.75.E+10            | 7.95.E+10            | 7.71.E+10            |
| 161 | P11940-1  | Polyadenylate-binding protein 1 [OS=Homo sapiens]                        | 288.993       | 3.35.E+09         | 3.44.E+09         | 3.48.E+09         | 3.49.E+09         | 3.05.E+09            | 3.13.E+09            | 3.21.E+09            | 3.19.E+09            | 3.27.E+09            | 3.31.E+09            | 3.26.E+09            | 3.26.E+09            |
| 162 | P02786    | Transferrin receptor protein 1 [OS=Homo sapiens]                         | 288.956       | 3.53.E+09         | 3.58.E+09         | 3.64.E+09         | 3.59.E+09         | 3.98.E+09            | 3.96.E+09            | 3.98.E+09            | 3.98.E+09            | 3.82.E+09            | 3.65.E+09            | 3.68.E+09            | 3.72.E+09            |
| 163 | Q12906-1  | Interleukin enhancer-binding factor 3 [OS=Homo sapiens]                  | 285.823       | 2.85.E+09         | 2.82.E+09         | 2.79.E+09         | 2.74.E+09         | 2.61.E+09            | 2.58.E+09            | 2.64.E+09            | 2.58.E+09            | 2.89.E+09            | 2.75.E+09            | 2.88.E+09            | 2.71.E+09            |
| 164 | Q9Y617-1  | phosphoserine aminotransferase [OS=Homo sapiens]                         | 285.815       | 9.67.E+09         | 9.50.E+09         | 9.60.E+09         | 9.37.E+09         | 9.62.E+09            | 9.66.E+09            | 9.56.E+09            | 9.81.E+09            | 7.83.E+09            | 7.72.E+09            | 7.66.E+09            | 7.65.E+09            |
| 165 | P62937    | peptidyl-prolyl cis-trans isomerase A [OS=Homo sapiens]                  | 279.853       | 2.64.E+10         | 2.64.E+10         | 2.72.E+10         | 2.68.E+10         | 2.43.E+10            | 2.48.E+10            | 2.50.E+10            | 2.51.E+10            | 3.11.E+10            | 3.08.E+10            | 3.09.E+10            | 3.03.E+10            |
| 166 | P40227-1  | T-complex protein 1 subunit zeta [OS=Homo sapiens]                       | 277.783       | 3.67.E+09         | 3.73.E+09         | 3.67.E+09         | 3.59.E+09         | 3.37.E+09            | 3.28.E+09            | 3.19.E+09            | 3.36.E+09            | 3.64.E+09            | 3.56.E+09            | 3.55.E+09            | 3.45.E+09            |
| 167 | O60506    | Heterogeneous nuclear ribonucleoprotein Q [OS=Homo sapiens]              | 277.532       | 3.64.E+09         | 3.67.E+09         | 3.64.E+09         | 3.57.E+09         | 3.53.E+09            | 3.38.E+09            | 3.52.E+09            | 3.52.E+09            | 3.71.E+09            | 3.56.E+09            | 3.48.E+09            | 3.54.E+09            |
| 168 | P08243-1  | Asparagine synthetase [glutamine-hydrolyzing] [OS=Homo sapiens]          | 274.95        | 4.11.E+09         | 3.94.E+09         | 4.14.E+09         | 4.22.E+09         | 3.91.E+09            | 4.06.E+09            | 4.21.E+09            | 4.01.E+09            | 4.65.E+09            | 4.52.E+09            | 4.47.E+09            | 4.49.E+09            |
| 169 | P33991    | DNA replication licensing factor MCM4 [OS=Homo sapiens]                  | 274.592       | 1.24.E+09         | 1.18.E+09         | 1.26.E+09         | 1.28.E+09         | 1.17.E+09            | 1.32.E+09            | 1.33.E+09            | 1.27.E+09            | 1.30.E+09            | 1.36.E+09            | 1.25.E+09            | 1.33.E+09            |
| 170 | P52209    | 6-phosphogluconate dehydrogenase, decarboxylating [OS=Homo sapiens]      | 273.219       | 2.80.E+09         | 2.86.E+09         | 2.86.E+09         | 2.83.E+09         | 3.35.E+09            | 3.46.E+09            | 3.28.E+09            | 3.32.E+09            | 2.30.E+09            | 2.30.E+09            | 2.30.E+09            | 2.29.E+09            |
| 171 | O60716-1  | Catenin delta-1 [OS=Homo sapiens]                                        | 272.472       | 1.13.E+09         | 1.16.E+09         | 1.17.E+09         | 1.17.E+09         | 1.16.E+09            | 1.20.E+09            | 1.14.E+09            | 1.17.E+09            | 1.28.E+09            | 1.32.E+09            | 1.35.E+09            | 1.34.E+09            |
| 172 | P23246-1  | splicing factor, proline- and glutamine-rich [OS=Homo sapiens]           | 271.539       | 2.22.E+09         | 2.28.E+09         | 2.23.E+09         | 2.37.E+09         | 2.27.E+09            | 2.28.E+09            | 2.24.E+09            | 2.27.E+09            | 2.25.E+09            | 2.31.E+09            | 2.36.E+09            | 2.33.E+09            |
| 173 | O75533-1  | splicing factor 3B subunit 1 [OS=Homo sapiens]                           | 271.042       | 6.66.E+08         | 6.51.E+08         | 6.65.E+08         | 7.06.E+08         | 5.95.E+08            | 6.83.E+08            | 6.68.E+08            | 6.44.E+08            | 7.41.E+08            | 7.66.E+08            | 7.57.E+08            | 8.33.E+08            |
| 174 | P34932    | Heat shock 70 kDa protein 4 [OS=Homo sapiens]                            | 269.655       | 1.21.E+09         | 1.20.E+09         | 1.18.E+09         | 1.37.E+09         | 1.10.E+09            | 1.26.E+09            | 1.14.E+09            | 1.13.E+09            | 1.26.E+09            | 1.32.E+09            | 1.21.E+09            | 1.24.E+09            |
| 175 | Q15084-1  | Protein disulfide-isomerase A6 [OS=Homo sapiens]                         | 267.967       | 3.19.E+09         | 3.20.E+09         | 3.32.E+09         | 3.41.E+09         | 3.19.E+09            | 3.22.E+09            | 3.29.E+09            | 3.20.E+09            | 3.10.E+09            | 3.01.E+09            | 3.02.E+09            | 3.05.E+09            |
| 176 | P30041    | Peroxiredoxin-6 [OS=Homo sapiens]                                        | 267.661       | 5.22.E+09         | 5.18.E+09         | 5.12.E+09         | 5.22.E+09         | 5.21.E+09            | 5.25.E+09            | 5.31.E+09            | 5.30.E+09            | 5.82.E+09            | 5.58.E+09            | 5.74.E+09            | 5.98.E+09            |
| 177 | O75083    | WD repeat-containing protein 1 [OS=Homo sapiens]                         | 266.942       | 1.47.E+09         | 1.45.E+09         | 1.40.E+09         | 1.43.E+09         | 1.80.E+09            | 1.81.E+09            | 1.78.E+09            | 1.82.E+09            | 1.82.E+09            | 1.84.E+09            | 1                    |                      |

Supplemental Data 1. List of identified proteins

| No. | Accession | Description                                                                                | Sum PEP Score | CTRL Abundances_1 | CTRL Abundances_2 | CTRL Abundances_3 | CTRL Abundances_4 | CLDN6-1 Abundances_1 | CLDN6-1 Abundances_2 | CLDN6-1 Abundances_3 | CLDN6-1 Abundances_4 | CLDN6-2 Abundances_1 | CLDN6-2 Abundances_2 | CLDN6-2 Abundances_3 | CLDN6-2 Abundances_4 |
|-----|-----------|--------------------------------------------------------------------------------------------|---------------|-------------------|-------------------|-------------------|-------------------|----------------------|----------------------|----------------------|----------------------|----------------------|----------------------|----------------------|----------------------|
| 182 | P63244    | Receptor of activated protein C kinase 1 [OS=Homo sapiens]                                 | 260.787       | 7.96.E+09         | 8.33.E+09         | 8.97.E+09         | 8.86.E+09         | 7.65.E+09            | 7.81.E+09            | 7.66.E+09            | 7.78.E+09            | 7.70.E+09            | 7.36.E+09            | 7.39.E+09            | 7.36.E+09            |
| 183 | P51991-2  | Isoform 2 of Heterogeneous nuclear ribonucleoprotein A3 [OS=Homo sapiens]                  | 260.646       | 4.07.E+07         | 4.75.E+07         | 4.26.E+07         | 4.27.E+07         | 4.63.E+07            | 4.25.E+07            | 4.11.E+07            | 4.22.E+07            | 5.58.E+07            | 6.21.E+07            | 5.70.E+07            | 5.86.E+07            |
| 184 | P49591    | Serine--tRNA ligase, cytoplasmic [OS=Homo sapiens]                                         | 260.567       | 3.65.E+09         | 3.35.E+09         | 3.32.E+09         | 3.68.E+09         | 3.60.E+09            | 3.54.E+09            | 3.56.E+09            | 3.47.E+09            | 3.17.E+09            | 3.05.E+09            | 2.97.E+09            | 2.98.E+09            |
| 185 | P27348    | 14-3-3 protein theta [OS=Homo sapiens]                                                     | 259.264       | 1.67.E+09         | 1.60.E+09         | 1.66.E+09         | 1.28.E+09         | 2.20.E+09            | 2.27.E+09            | 2.24.E+09            | 2.10.E+09            | 2.15.E+09            | 2.14.E+09            | 2.06.E+09            | 1.97.E+09            |
| 186 | Q92616    | eIF-2-alpha kinase activator GCN1 [OS=Homo sapiens]                                        | 259.102       | 6.47.E+08         | 6.24.E+08         | 6.46.E+08         | 6.41.E+08         | 6.04.E+08            | 6.21.E+08            | 6.17.E+08            | 6.30.E+08            | 7.45.E+08            | 7.38.E+08            | 7.39.E+08            | 7.50.E+08            |
| 187 | Q13263    | Transcription intermediary factor 1-beta [OS=Homo sapiens]                                 | 258.934       | 1.36.E+09         | 1.44.E+09         | 1.34.E+09         | 1.30.E+09         | 1.12.E+09            | 1.13.E+09            | 1.17.E+09            | 1.13.E+09            | 1.10.E+09            | 9.66.E+08            | 1.07.E+09            | 1.12.E+09            |
| 188 | P20700    | Lamin-B1 [OS=Homo sapiens]                                                                 | 258.916       | 1.45.E+09         | 1.18.E+09         | 1.21.E+09         | 1.23.E+09         | 1.29.E+09            | 1.37.E+09            | 1.22.E+09            | 1.21.E+09            | 1.26.E+09            | 1.08.E+09            | 1.11.E+09            | 1.06.E+09            |
| 189 | P22102-1  | trifunctional purine biosynthetic protein adenosine-3 [OS=Homo sapiens]                    | 258.74        | 2.08.E+09         | 2.02.E+09         | 2.01.E+09         | 2.13.E+09         | 1.86.E+09            | 1.88.E+09            | 1.90.E+09            | 1.82.E+09            | 1.87.E+09            | 1.81.E+09            | 1.80.E+09            | 1.80.E+09            |
| 190 | P84077    | ADP-ribosylation factor 1 [OS=Homo sapiens]                                                | 254.759       | 2.96.E+09         | 2.84.E+09         | 2.84.E+09         | 2.86.E+09         | 3.02.E+09            | 3.16.E+09            | 3.12.E+09            | 3.05.E+09            | 2.92.E+09            | 2.98.E+09            | 2.99.E+09            | 3.07.E+09            |
| 191 | P67809    | Nuclease-sensitive element-binding protein 1 [OS=Homo sapiens]                             | 254.185       | 1.60.E+09         | 1.70.E+09         | 1.80.E+09         | 1.78.E+09         | 1.59.E+09            | 1.66.E+09            | 1.60.E+09            | 1.69.E+09            | 1.73.E+09            | 2.00.E+09            | 1.93.E+09            | 1.90.E+09            |
| 192 | P49368-1  | T-complex protein 1 subunit gamma [OS=Homo sapiens]                                        | 253.9         | 3.21.E+09         | 3.11.E+09         | 3.19.E+09         | 3.17.E+09         | 2.79.E+09            | 2.81.E+09            | 2.82.E+09            | 2.80.E+09            | 3.16.E+09            | 3.17.E+09            | 3.21.E+09            | 3.21.E+09            |
| 193 | P49736    | DNA replication licensing factor mcm2 [OS=Homo sapiens]                                    | 252.96        | 1.22.E+09         | 1.27.E+09         | 1.27.E+09         | 1.28.E+09         | 1.24.E+09            | 1.33.E+09            | 1.29.E+09            | 1.28.E+09            | 1.34.E+09            | 1.33.E+09            | 1.36.E+09            | 1.35.E+09            |
| 194 | P25205    | DNA replication licensing factor mcm3 [OS=Homo sapiens]                                    | 252.811       | 1.14.E+09         | 1.09.E+09         | 1.12.E+09         | 1.10.E+09         | 1.15.E+09            | 1.15.E+09            | 1.21.E+09            | 1.12.E+09            | 1.23.E+09            | 1.18.E+09            | 1.19.E+09            | 1.29.E+09            |
| 195 | P08865    | 40S ribosomal protein SA [OS=Homo sapiens]                                                 | 251.248       | 6.07.E+09         | 5.93.E+09         | 6.15.E+09         | 6.00.E+09         | 5.73.E+09            | 5.68.E+09            | 5.69.E+09            | 5.70.E+09            | 5.46.E+09            | 5.59.E+09            | 5.70.E+09            | 5.92.E+09            |
| 196 | P53621-1  | coatamer subunit alpha [OS=Homo sapiens]                                                   | 249.948       | 1.33.E+09         | 1.27.E+09         | 1.32.E+09         | 1.31.E+09         | 1.35.E+09            | 1.31.E+09            | 1.37.E+09            | 1.31.E+09            | 1.42.E+09            | 1.47.E+09            | 1.49.E+09            | 1.47.E+09            |
| 197 | Q9BUF5    | Tubulin beta-6 chain [OS=Homo sapiens]                                                     | 249.59        | 2.14.E+08         | 2.33.E+08         | 1.65.E+08         | 1.74.E+08         | 2.47.E+08            | 2.17.E+08            | 2.37.E+08            | 2.20.E+08            | 3.07.E+08            | 2.41.E+08            | 3.06.E+08            | 3.30.E+08            |
| 198 | O75874    | Isocitrate dehydrogenase [NADP] cytoplasmic [OS=Homo sapiens]                              | 248.792       | 2.52.E+09         | 2.48.E+09         | 2.53.E+09         | 2.52.E+09         | 2.42.E+09            | 2.40.E+09            | 2.43.E+09            | 2.39.E+09            | 1.69.E+09            | 1.77.E+09            | 1.77.E+09            | 1.79.E+09            |
| 199 | P11166    | Solute carrier family 2, facilitated glucose transporter member 1 [OS=Homo sapiens]        | 248.374       | 1.69.E+10         | 1.62.E+10         | 1.58.E+10         | 1.64.E+10         | 1.37.E+10            | 1.39.E+10            | 1.40.E+10            | 1.37.E+10            | 1.57.E+10            | 1.53.E+10            | 1.46.E+10            | 1.44.E+10            |
| 200 | P43243    | Matrin-3 [OS=Homo sapiens]                                                                 | 248.186       | 1.70.E+09         | 1.65.E+09         | 1.65.E+09         | 1.68.E+09         | 1.54.E+09            | 1.53.E+09            | 1.52.E+09            | 1.47.E+09            | 1.68.E+09            | 1.63.E+09            | 1.58.E+09            | 1.62.E+09            |
| 201 | O95373    | Importin-7 [OS=Homo sapiens]                                                               | 248.089       | 9.05.E+08         | 7.98.E+08         | 8.21.E+08         | 8.86.E+08         | 7.68.E+08            | 7.49.E+08            | 7.34.E+08            | 7.13.E+08            | 8.54.E+08            | 8.59.E+08            | 8.71.E+08            | 8.43.E+08            |
| 202 | P50395-1  | Rab GDP dissociation inhibitor beta [OS=Homo sapiens]                                      | 246.652       | 1.99.E+09         | 1.74.E+09         | 1.84.E+09         | 1.87.E+09         | 1.90.E+09            | 1.95.E+09            | 1.96.E+09            | 1.87.E+09            | 1.94.E+09            | 1.95.E+09            | 1.88.E+09            | 1.96.E+09            |
| 203 | P16435    | NADPH--cytochrome P450 reductase [OS=Homo sapiens]                                         | 246.138       | 1.02.E+09         | 9.43.E+08         | 9.27.E+08         | 9.35.E+08         | 6.28.E+08            | 5.89.E+08            | 5.83.E+08            | 5.69.E+08            | 9.11.E+08            | 9.16.E+08            | 8.96.E+08            | 8.91.E+08            |
| 204 | Q15365    | Poly(RC)-binding protein 1 [OS=Homo sapiens]                                               | 245.516       | 2.86.E+09         | 2.93.E+09         | 2.92.E+09         | 2.90.E+09         | 2.57.E+09            | 2.57.E+09            | 2.52.E+09            | 2.69.E+09            | 3.16.E+09            | 3.04.E+09            | 3.01.E+09            | 2.96.E+09            |
| 205 | Q9NR30-1  | Nucleolar RNA helicase 2 [OS=Homo sapiens]                                                 | 244.885       | 1.40.E+09         | 1.28.E+09         | 1.38.E+09         | 1.41.E+09         | 1.10.E+09            | 1.12.E+09            | 1.15.E+09            | 1.10.E+09            | 1.24.E+09            | 1.19.E+09            | 1.23.E+09            | 1.15.E+09            |
| 206 | Q6DD88    | Atlastin-3 [OS=Homo sapiens]                                                               | 244.743       | 1.61.E+09         | 1.52.E+09         | 1.50.E+09         | 1.51.E+09         | 1.73.E+09            | 1.68.E+09            | 1.68.E+09            | 1.63.E+09            | 1.88.E+09            | 1.95.E+09            | 1.90.E+09            | 1.90.E+09            |
| 207 | O00159-1  | Unconventional myosin-Ic [OS=Homo sapiens]                                                 | 240.943       | 1.40.E+09         | 1.44.E+09         | 1.49.E+09         | 1.52.E+09         | 1.69.E+09            | 1.76.E+09            | 1.73.E+09            | 1.62.E+09            | 9.90.E+08            | 9.54.E+08            | 9.81.E+08            | 1.02.E+09            |
| 208 | P07737    | profilin-1 [OS=Homo sapiens]                                                               | 240.475       | 1.37.E+10         | 1.39.E+10         | 1.34.E+10         | 1.30.E+10         | 1.60.E+10            | 1.54.E+10            | 1.51.E+10            | 1.55.E+10            | 1.06.E+10            | 1.01.E+10            | 1.02.E+10            | 1.04.E+10            |
| 209 | Q14152    | Eukaryotic translation initiation factor 3 subunit A [OS=Homo sapiens]                     | 238.568       | 1.39.E+09         | 1.40.E+09         | 1.44.E+09         | 1.49.E+09         | 1.44.E+09            | 1.44.E+09            | 1.48.E+09            | 1.51.E+09            | 1.51.E+09            | 1.57.E+09            | 1.55.E+09            | 1.49.E+09            |
| 210 | P56192    | Methionine--tRNA ligase, cytoplasmic [OS=Homo sapiens]                                     | 238.222       | 9.34.E+08         | 9.44.E+08         | 9.72.E+08         | 9.35.E+08         | 7.93.E+08            | 9.10.E+08            | 8.21.E+08            | 7.64.E+08            | 8.92.E+08            | 9.25.E+08            | 1.01.E+09            | 9.72.E+08            |
| 211 | Q9Y678    | Coatamer subunit gamma-1 [OS=Homo sapiens]                                                 | 237.702       | 7.66.E+08         | 9.55.E+08         | 9.38.E+08         | 8.13.E+08         | 1.07.E+09            | 1.08.E+09            | 1.08.E+09            | 1.06.E+09            | 1.06.E+09            | 1.10.E+09            | 1.02.E+09            | 1.08.E+09            |
| 212 | O15067    | Phosphoribosylformylglycinamide synthase [OS=Homo sapiens]                                 | 237.119       | 1.07.E+09         | 1.07.E+09         | 1.06.E+09         | 1.13.E+09         | 8.75.E+08            | 9.27.E+08            | 8.92.E+08            | 8.50.E+08            | 7.34.E+08            | 8.62.E+08            | 8.13.E+08            | 8.19.E+08            |
| 213 | P55209    | Nucleosome assembly protein 1-like 1 [OS=Homo sapiens]                                     | 237.096       | 2.33.E+09         | 2.22.E+09         | 2.31.E+09         | 2.29.E+09         | 2.16.E+09            | 2.15.E+09            | 2.16.E+09            | 2.08.E+09            | 2.69.E+09            | 2.77.E+09            | 2.75.E+09            | 2.86.E+09            |
| 214 | P62424    | 60S ribosomal protein L7a [OS=Homo sapiens]                                                | 235.187       | 3.55.E+09         | 3.78.E+09         | 3.82.E+09         | 3.69.E+09         | 3.62.E+09            | 3.68.E+09            | 3.64.E+09            | 3.75.E+09            | 3.47.E+09            | 3.57.E+09            | 3.61.E+09            | 3.56.E+09            |
| 215 | P19367-1  | Hexokinase-1 [OS=Homo sapiens]                                                             | 235.158       | 9.17.E+08         | 9.05.E+08         | 8.83.E+08         | 9.35.E+08         | 1.07.E+09            | 1.18.E+09            | 1.12.E+09            | 1.17.E+09            | 1.56.E+09            | 1.60.E+09            | 1.64.E+09            | 1.67.E+09            |
| 216 | P52272    | Heterogeneous nuclear ribonucleoprotein M [OS=Homo sapiens]                                | 235.076       | 2.25.E+09         | 2.18.E+09         | 1.77.E+09         | 1.88.E+09         | 2.06.E+09            | 1.67.E+09            | 1.96.E+09            | 1.99.E+09            | 2.27.E+09            | 2.31.E+09            | 2.23.E+09            | 2.20.E+09            |
| 217 | Q8WUM4    | Programmed cell death 6-interacting protein [OS=Homo sapiens]                              | 234.753       | 1.17.E+09         | 1.23.E+09         | 1.19.E+09         | 1.07.E+09         | 1.25.E+09            | 1.14.E+09            | 1.22.E+09            | 1.16.E+09            | 1.25.E+09            | 1.15.E+09            | 1.16.E+09            | 1.14.E+09            |
| 218 | Q9BSJ8    | Extended synaptotagmin-1 [OS=Homo sapiens]                                                 | 233.767       | 7.47.E+08         | 6.90.E+08         | 6.92.E+08         | 7.35.E+08         | 8.56.E+08            | 8.64.E+08            | 8.54.E+08            | 8.25.E+08            | 6.11.E+08            | 5.88.E+08            | 6.08.E+08            | 5.92.E+08            |
| 219 | P09493-3  | Isoform 3 of Tropomyosin alpha-1 chain [OS=Homo sapiens]                                   | 233.018       | 8.46.E+08         | 8.77.E+08         | 8.25.E+08         | 8.21.E+08         | 8.23.E+08            | 8.04.E+08            | 7.67.E+08            | 7.80.E+08            | 1.07.E+09            | 1.04.E+09            | 1.04.E+09            | 1.04.E+09            |
| 220 | P09960-1  | leukotriene A-4 hydrolase [OS=Homo sapiens]                                                | 232.526       | 1.07.E+09         | 1.11.E+09         | 1.15.E+09         | 1.13.E+09         | 1.14.E+09            | 1.15.E+09            | 1.14.E+09            | 1.11.E+09            | 1.36.E+09            | 1.45.E+09            | 1.37.E+09            | 1.43.E+09            |
| 221 | Q99714-1  | 3-hydroxyacyl-CoA dehydrogenase type-2 [OS=Homo sapiens]                                   | 231.222       | 9.46.E+08         | 8.68.E+08         | 8.68.E+08         | 8.93.E+08         | 7.56.E+08            | 7.24.E+08            | 7.15.E+08            | 7.21.E+08            | 8.33.E+08            | 8.09.E+08            | 8.37.E+08            | 8.26.E+08            |
| 222 | P52597    | Heterogeneous nuclear ribonucleoprotein F [OS=Homo sapiens]                                | 231.08        | 2.25.E+09         | 2.47.E+09         | 2.56.E+09         | 2.70.E+09         | 2.45.E+09            | 2.43.E+09            | 2.36.E+09            | 2.19.E+09            | 2.37.E+09            | 2.33.E+09            | 2.39.E+09            | 2.45.E+09            |
| 223 | P05387    | 60S acidic ribosomal protein P2 [OS=Homo sapiens]                                          | 230.481       | 3.42.E+09         | 3.34.E+09         | 3.39.E+09         | 3.45.E+09         | 3.62.E+09            | 3.46.E+09            | 3.64.E+09            | 3.61.E+09            | 3.63.E+09            | 3.75.E+09            | 3.73.E+09            | 3.86.E+09            |
| 224 | P30043    | flavin reductase (NADPH) [OS=Homo sapiens]                                                 | 229.899       | 2.47.E+09         | 2.73.E+09         | 2.72.E+09         | 2.49.E+09         | 3.00.E+09            | 3.10.E+09            | 2.96.E+09            | 2.60.E+09            | 2.80.E+09            | 2.59.E+09            | 2.79.E+09            | 2.61.E+09            |
| 225 | P46777    | 60S ribosomal protein L5 [OS=Homo sapiens]                                                 | 229.771       | 2.53.E+09         | 2.51.E+09         | 2.56.E+09         | 2.57.E+09         | 2.38.E+09            | 2.38.E+09            | 2.32.E+09            | 2.39.E+09            | 2.19.E+09            | 2.31.E+09            | 2.31.E+09            | 2.32.E+09            |
| 226 | Q92841    | Probable ATP-dependent RNA helicase DDX17 [OS=Homo sapiens]                                | 229.733       | 2.67.E+09         | 2.71.E+09         | 2.72.E+09         | 2.67.E+09         | 2.49.E+09            | 2.49.E+09            | 2.47.E+09            | 2.47.E+09            | 2.88.E+09            | 2.84.E+09            | 2.80.E+09            | 2.80.E+09            |
| 227 | P48735    | Isocitrate dehydrogenase [NADP], mitochondrial [OS=Homo sapiens]                           | 228.762       | 2.06.E+09         | 1.98.E+09         | 2.04.E+09         | 2.08.E+09         | 1.61.E+09            | 1.62.E+09            | 1.64.E+09            | 1.65.E+09            | 2.62.E+09            | 2.40.E+09            | 2.49.E+09            | 2.49.E+09            |
| 228 | P04844-1  | Dolichyl-diphosphooligosaccharide--protein glycosyltransferase subunit 2 [OS=Homo sapiens] | 228.527       | 9.33.E+08         | 8.23.E+08         | 8.80.E+08         | 8.66.E+08         | 9.05.E+08            | 9.92.E+08            | 1.02.E+09            | 9.19.E+08            | 8.31.E+08            | 8.65.E+08            | 8.12.E+08            | 7.78.E+08            |
| 229 | P62826    | GTP-binding nuclear protein RAN [OS=Homo sapiens]                                          | 228.083       | 6.30.E+09         | 6.44.E+09         | 6.44.E+09         | 6.41.E+09         | 6.17.E+09            | 6.11.E+09            | 6.08.E+09            | 5.88.E+09            | 6.89.E+09            | 6.71.E+09            | 6.77.E+09            | 6.81.E+09            |
| 230 | P46782    | 40S ribosomal protein S5 [OS=Homo sapiens]                                                 | 227.99        | 2.25.E+09         | 1.92.E+09         | 2.13.E+09         | 2.33.E+09         | 2.17.E+09            | 2.26.E+09            | 2.17.E+09            | 2.05.E+09            | 1.90.E+09            | 2.03.E+09            | 1.87.E+09            | 1.67.E+09            |
| 231 | P23284    | peptidyl-prolyl cis-trans isomerase B [OS=Homo sapiens]                                    | 227.946       | 1.01.E+10         | 1.05.E+10         | 1.00.E+10         | 9.90.E+09         | 1.10.E+10            | 1.08.E+10            | 1.06.E+10            | 1.10.E+10            | 9.24.E+09            | 9.08.E+09            | 9.25.E+09            | 9.30.E+09            |
| 232 | P15559-1  | NAD(P)H dehydrogenase [quinone] 1 [OS=Homo sapiens]                                        | 227.169       | 7.66.E+09         | 8.15.E+09         | 8.19.E+09         | 8.10.E+09         | 8.63.E+09            | 8.69.E+09            | 8.67.E+09            | 9.00.E+09            | 9.89.E+09            | 1.06.E+10            | 1.05.E+10            | 1.03.E+10            |
| 233 | P61981    | 14-3-3 protein gamma [OS=Homo sapiens]                                                     | 226.383       | 1.30.E+09         | 1.18.E+09         | 1.26.E+09         | 1.34.E+09         | 1.37.E+09            | 1.40.E+09            | 1.37.E+09            | 1.34.E+09            | 1.24.E+09            | 1.34.E+09            | 1.32.E+09            | 1.26.E+09            |
| 234 | Q01518-1  | adenyllyl cyclase-associated protein 1 [OS=Homo sapiens]                                   | 226.354       | 1.14.E+09         | 1.09.E+09         | 1.15.E+09         | 1.18.E+09         | 1.29.E+09            | 1.34.E+09            | 1.31.E+09            | 1.35.E+09            | 1.26.E+09            | 1.26.E+09            | 1.26.E+09            | 1.28.E+09            |
| 235 | P27824    | Calnexin [OS=Homo sapiens]                                                                 | 226.035       | 2.75.E+09         | 2.68.E+09         | 2.62.E+09         | 2.82.E+09         | 2.83.E+09            | 2.91.E+09            | 2.91.E+09            | 2.80.E+09            | 2.56.E+09            | 2.90.E+09            | 2.70.E+09            | 2.44.E+09            |
| 236 | O95573    | long-chain-fatty-acid--CoA ligase 3 [OS=Homo sapiens]                                      | 225.878       | 1.57.E+09         | 1.43.E+09         | 1.51.E+09         | 1.50.E+09         | 1.42.E+09            | 1.40.E+09            | 1.41.E+09            | 1.46.E+09            | 1.30.E+09            | 1.29.E+09            | 1.30.E+09            | 1.30.E+09            |
| 237 | P10412    | Histone H1.4 [OS=Homo sapiens]                                                             | 224.495       | 8.78.E+09         | 9.21.E+09         | 9.56.E+09         | 9.38.E+09         | 8.23.E+09            | 8.30.E+09            | 8.35.E+09            | 8.70.E+09            | 8.25.E+09            | 9.23.E+09            | 9.37.E+09            | 9.08.E+09            |
| 238 | Q14566    | DNA replication licensing factor MCM6 [OS=Homo sapiens]                                    | 224.291       | 1.56.E+09         | 1.55.E+09         | 1.53.E+09         | 1.57.E+09         | 1.63.E+09            | 1.65.E+09            | 1.62.E+09            | 1.68.E+09            | 1.68.E+09            | 1.67.E+09            | 1.67.E+09            | 1.64.E+              |

| No. | Accession | Description                                                                                | Sum PEP Score | CTRL Abundances_1 | CTRL Abundances_2 | CTRL Abundances_3 | CTRL Abundances_4 | CLDN6-1 Abundances_1 | CLDN6-1 Abundances_2 | CLDN6-1 Abundances_3 | CLDN6-1 Abundances_4 | CLDN6-2 Abundances_1 | CLDN6-2 Abundances_2 | CLDN6-2 Abundances_3 | CLDN6-2 Abundances_4 |
|-----|-----------|--------------------------------------------------------------------------------------------|---------------|-------------------|-------------------|-------------------|-------------------|----------------------|----------------------|----------------------|----------------------|----------------------|----------------------|----------------------|----------------------|
| 239 | P46821    | microtubule-associated protein 1B [OS=Homo sapiens]                                        | 223.78        | 3.85.E+08         | 4.01.E+08         | 3.87.E+08         | 4.17.E+08         | 7.86.E+08            | 8.09.E+08            | 8.82.E+08            | 7.65.E+08            | 4.84.E+08            | 5.55.E+08            | 4.89.E+08            | 5.18.E+08            |
| 240 | P05388    | 60S acidic ribosomal protein P0 [OS=Homo sapiens]                                          | 223.738       | 5.03.E+09         | 4.92.E+09         | 5.05.E+09         | 4.96.E+09         | 4.77.E+09            | 4.72.E+09            | 4.77.E+09            | 4.24.E+09            | 4.78.E+09            | 4.73.E+09            | 4.69.E+09            | 4.82.E+09            |
| 241 | P51858    | hepatoma-derived growth factor [OS=Homo sapiens]                                           | 222.962       | 1.97.E+09         | 2.00.E+09         | 2.06.E+09         | 2.05.E+09         | 2.02.E+09            | 2.04.E+09            | 2.00.E+09            | 2.00.E+09            | 2.32.E+09            | 2.32.E+09            | 2.35.E+09            | 2.26.E+09            |
| 242 | P16403    | Histone H1.2 [OS=Homo sapiens]                                                             | 222.122       | 7.62.E+08         | 7.93.E+08         | 8.20.E+08         | 9.00.E+08         | 6.22.E+08            | 6.68.E+08            | 6.51.E+08            | 6.88.E+08            | 6.93.E+08            | 7.99.E+08            | 8.30.E+08            | 8.12.E+08            |
| 243 | Q7KZF4    | staphylococcal nuclease domain-containing protein 1 [OS=Homo sapiens]                      | 221.814       | 7.13.E+08         | 8.56.E+08         | 8.63.E+08         | 8.85.E+08         | 8.23.E+08            | 9.24.E+08            | 8.91.E+08            | 9.61.E+08            | 9.21.E+08            | 9.56.E+08            | 8.94.E+08            | 9.41.E+08            |
| 244 | P07099    | epoxide hydrolase 1 [OS=Homo sapiens]                                                      | 221.312       | 2.73.E+09         | 2.58.E+09         | 2.54.E+09         | 2.55.E+09         | 3.50.E+09            | 3.55.E+09            | 3.58.E+09            | 3.61.E+09            | 3.59.E+09            | 3.44.E+09            | 3.47.E+09            | 3.49.E+09            |
| 245 | P39023    | 60S ribosomal protein L3 [OS=Homo sapiens]                                                 | 220.928       | 2.91.E+09         | 3.31.E+09         | 3.17.E+09         | 3.28.E+09         | 3.06.E+09            | 3.05.E+09            | 2.92.E+09            | 3.02.E+09            | 2.76.E+09            | 2.92.E+09            | 2.84.E+09            | 2.75.E+09            |
| 246 | P14923    | Junction plakoglobin [OS=Homo sapiens]                                                     | 220.865       | 6.95.E+08         | 7.01.E+08         | 7.54.E+08         | 7.71.E+08         | 7.77.E+08            | 7.82.E+08            | 8.48.E+08            | 8.00.E+08            | 7.53.E+08            | 7.42.E+08            | 7.42.E+08            | 7.81.E+08            |
| 247 | P41091    | eukaryotic translation initiation factor 2 subunit 3 [OS=Homo sapiens]                     | 220.821       | 2.12.E+09         | 2.17.E+09         | 2.25.E+09         | 2.25.E+09         | 2.16.E+09            | 2.16.E+09            | 2.14.E+09            | 2.23.E+09            | 2.06.E+09            | 2.14.E+09            | 2.15.E+09            | 2.24.E+09            |
| 248 | Q3ZCM7    | tubulin beta-8 chain [OS=Homo sapiens]                                                     | 220.47        | 5.97.E+07         | 5.93.E+07         | 7.02.E+07         | 6.49.E+07         | 7.66.E+07            | 7.95.E+07            | 7.23.E+07            | 7.64.E+07            | 7.37.E+07            | 1.04.E+08            | 1.09.E+08            | 1.08.E+08            |
| 249 | O43776    | Asparagine--tRNA ligase, cytoplasmic [OS=Homo sapiens]                                     | 217.497       | 1.87.E+09         | 1.88.E+09         | 2.18.E+09         | 2.23.E+09         | 1.80.E+09            | 1.67.E+09            | 1.59.E+09            | 1.70.E+09            | 1.67.E+09            | 1.86.E+09            | 1.79.E+09            | 1.83.E+09            |
| 250 | P33993-1  | DNA replication licensing factor MCM7 [OS=Homo sapiens]                                    | 216.999       | 1.33.E+09         | 1.21.E+09         | 1.27.E+09         | 1.31.E+09         | 1.21.E+09            | 1.23.E+09            | 1.25.E+09            | 1.23.E+09            | 1.34.E+09            | 1.19.E+09            | 1.17.E+09            | 1.17.E+09            |
| 251 | Q12905    | Interleukin enhancer-binding factor 2 [OS=Homo sapiens]                                    | 215.863       | 1.88.E+09         | 1.87.E+09         | 1.84.E+09         | 1.80.E+09         | 1.65.E+09            | 1.62.E+09            | 1.69.E+09            | 1.67.E+09            | 1.89.E+09            | 1.88.E+09            | 1.91.E+09            | 1.98.E+09            |
| 252 | Q92499    | ATP-dependent RNA helicase DDX1 [OS=Homo sapiens]                                          | 214.816       | 6.46.E+08         | 6.31.E+08         | 6.71.E+08         | 6.56.E+08         | 6.35.E+08            | 7.84.E+08            | 6.85.E+08            | 6.72.E+08            | 6.57.E+08            | 6.22.E+08            | 6.28.E+08            | 6.12.E+08            |
| 253 | O14980    | Exportin-1 [OS=Homo sapiens]                                                               | 214.259       | 7.04.E+08         | 6.79.E+08         | 6.92.E+08         | 6.71.E+08         | 7.41.E+08            | 7.26.E+08            | 7.35.E+08            | 6.88.E+08            | 7.42.E+08            | 7.34.E+08            | 7.23.E+08            | 7.08.E+08            |
| 254 | O43390-1  | heterogeneous nuclear ribonucleoprotein r [OS=Homo sapiens]                                | 213.644       | 1.32.E+09         | 1.26.E+09         | 1.25.E+09         | 1.37.E+09         | 1.22.E+09            | 1.23.E+09            | 1.21.E+09            | 1.18.E+09            | 1.31.E+09            | 1.36.E+09            | 1.35.E+09            | 1.35.E+09            |
| 255 | P22392-2  | Isoform 3 of Nucleoside diphosphate kinase B [OS=Homo sapiens]                             | 213.43        | 7.16.E+09         | 7.05.E+09         | 7.33.E+09         | 7.16.E+09         | 7.91.E+09            | 8.03.E+09            | 8.02.E+09            | 8.25.E+09            | 7.94.E+09            | 8.22.E+09            | 8.26.E+09            | 8.10.E+09            |
| 256 | O00571    | ATP-dependent RNA helicase DDX3X [OS=Homo sapiens]                                         | 212.997       | 1.70.E+09         | 1.85.E+09         | 1.93.E+09         | 1.97.E+09         | 1.82.E+09            | 1.94.E+09            | 1.97.E+09            | 1.88.E+09            | 1.73.E+09            | 1.89.E+09            | 1.84.E+09            | 1.93.E+09            |
| 257 | P17655-1  | Calpain-2 catalytic subunit [OS=Homo sapiens]                                              | 211.834       | 7.83.E+08         | 7.70.E+08         | 7.48.E+08         | 8.14.E+08         | 1.12.E+09            | 1.07.E+09            | 1.12.E+09            | 1.08.E+09            | 9.67.E+08            | 9.79.E+08            | 9.99.E+08            | 1.00.E+09            |
| 258 | P17844    | probable ATP-dependent RNA helicase DDX5 [OS=Homo sapiens]                                 | 211.435       | 1.84.E+09         | 1.92.E+09         | 1.77.E+09         | 1.83.E+09         | 1.61.E+09            | 1.66.E+09            | 1.55.E+09            | 1.56.E+09            | 1.73.E+09            | 1.70.E+09            | 1.72.E+09            | 1.58.E+09            |
| 259 | P61247    | 40S ribosomal protein S3a [OS=Homo sapiens]                                                | 210.392       | 5.24.E+09         | 5.37.E+09         | 5.15.E+09         | 5.17.E+09         | 4.93.E+09            | 4.91.E+09            | 4.94.E+09            | 5.09.E+09            | 4.74.E+09            | 4.55.E+09            | 4.65.E+09            | 4.52.E+09            |
| 260 | P31040    | Succinate dehydrogenase [ubiquinone] flavoprotein subunit, mitochondrial [OS=Homo sapiens] | 209.458       | 1.13.E+09         | 1.12.E+09         | 1.13.E+09         | 1.05.E+09         | 1.03.E+09            | 1.08.E+09            | 1.04.E+09            | 9.96.E+08            | 1.11.E+09            | 1.08.E+09            | 1.03.E+09            | 1.07.E+09            |
| 261 | P23396-1  | 40S ribosomal protein S3 [OS=Homo sapiens]                                                 | 208.503       | 5.84.E+09         | 6.01.E+09         | 6.03.E+09         | 5.84.E+09         | 5.60.E+09            | 5.83.E+09            | 5.93.E+09            | 5.96.E+09            | 5.61.E+09            | 5.35.E+09            | 5.60.E+09            | 5.55.E+09            |
| 262 | P40926    | Malate dehydrogenase, mitochondrial [OS=Homo sapiens]                                      | 206.933       | 8.71.E+09         | 8.51.E+09         | 8.45.E+09         | 8.70.E+09         | 7.23.E+09            | 7.21.E+09            | 7.66.E+09            | 6.80.E+09            | 7.73.E+09            | 8.11.E+09            | 7.95.E+09            | 8.60.E+09            |
| 263 | Q16555-1  | Dihydropyrimidinase-related protein 2 [OS=Homo sapiens]                                    | 206.425       | 1.04.E+09         | 1.05.E+09         | 9.81.E+08         | 9.50.E+08         | 1.35.E+09            | 1.33.E+09            | 1.37.E+09            | 1.36.E+09            | 8.95.E+08            | 7.99.E+08            | 7.88.E+08            | 8.16.E+08            |
| 264 | P35606    | Coatomer subunit beta [OS=Homo sapiens]                                                    | 203.047       | 8.63.E+08         | 7.86.E+08         | 8.69.E+08         | 9.04.E+08         | 8.51.E+08            | 8.61.E+08            | 8.72.E+08            | 8.61.E+08            | 9.61.E+08            | 9.32.E+08            | 9.92.E+08            | 9.94.E+08            |
| 265 | P52565-1  | rho GDP-dissociation inhibitor 1 [OS=Homo sapiens]                                         | 202.154       | 2.92.E+09         | 2.89.E+09         | 2.94.E+09         | 2.86.E+09         | 3.28.E+09            | 3.26.E+09            | 3.20.E+09            | 3.13.E+09            | 2.73.E+09            | 2.56.E+09            | 2.55.E+09            | 2.55.E+09            |
| 266 | P05187    | alkaline phosphatase, placental type [OS=Homo sapiens]                                     | 202.078       | 1.61.E+09         | 1.67.E+09         | 1.56.E+09         | 1.61.E+09         | 5.60.E+08            | 5.36.E+08            | 5.28.E+08            | 5.19.E+08            | 2.44.E+08            | 2.18.E+08            | 2.03.E+08            | 2.55.E+08            |
| 267 | P16152    | Carbonyl reductase [NADPH] 1 [OS=Homo sapiens]                                             | 202.055       | 2.56.E+09         | 2.61.E+09         | 2.65.E+09         | 2.59.E+09         | 2.47.E+09            | 2.46.E+09            | 2.48.E+09            | 2.55.E+09            | 2.73.E+09            | 2.71.E+09            | 2.69.E+09            | 2.69.E+09            |
| 268 | Q13838-1  | spliceosome RNA helicase DDX39B [OS=Homo sapiens]                                          | 201.811       | 5.29.E+08         | 5.08.E+08         | 5.00.E+08         | 5.35.E+08         | 5.58.E+08            | 5.53.E+08            | 5.52.E+08            | 5.53.E+08            | 5.45.E+08            | 5.66.E+08            | 5.49.E+08            | 5.46.E+08            |
| 269 | P45880    | Voltage-dependent anion-selective channel protein 2 [OS=Homo sapiens]                      | 201.5         | 3.25.E+09         | 3.44.E+09         | 3.32.E+09         | 3.24.E+09         | 2.84.E+09            | 2.84.E+09            | 2.89.E+09            | 2.94.E+09            | 3.25.E+09            | 3.17.E+09            | 2.99.E+09            | 2.97.E+09            |
| 270 | Q92945    | Far upstream element-binding protein 2 [OS=Homo sapiens]                                   | 201.183       | 7.38.E+08         | 7.46.E+08         | 7.53.E+08         | 8.29.E+08         | 6.79.E+08            | 6.73.E+08            | 6.65.E+08            | 6.82.E+08            | 8.20.E+08            | 8.80.E+08            | 8.11.E+08            | 8.13.E+08            |
| 271 | P18124    | 60S ribosomal protein L7 [OS=Homo sapiens]                                                 | 200.334       | 3.87.E+09         | 3.86.E+09         | 3.91.E+09         | 4.00.E+09         | 3.66.E+09            | 3.73.E+09            | 3.70.E+09            | 3.68.E+09            | 3.46.E+09            | 3.54.E+09            | 3.41.E+09            | 3.48.E+09            |
| 272 | Q15233    | Non-POU domain-containing octamer-binding protein [OS=Homo sapiens]                        | 200.199       | 1.40.E+09         | 1.41.E+09         | 1.40.E+09         | 1.44.E+09         | 1.36.E+09            | 1.27.E+09            | 1.31.E+09            | 1.33.E+09            | 1.45.E+09            | 1.39.E+09            | 1.40.E+09            | 1.40.E+09            |
| 273 | P00390    | Glutathione reductase, mitochondrial [OS=Homo sapiens]                                     | 200.195       | 1.60.E+09         | 1.73.E+09         | 1.74.E+09         | 1.69.E+09         | 1.57.E+09            | 1.60.E+09            | 1.58.E+09            | 1.62.E+09            | 1.50.E+09            | 1.62.E+09            | 1.59.E+09            | 1.59.E+09            |
| 274 | P04843    | Dolichyl-diphosphooligosaccharide--protein glycosyltransferase subunit 1 [OS=Homo sapiens] | 199.332       | 1.43.E+09         | 1.46.E+09         | 1.46.E+09         | 1.47.E+09         | 1.48.E+09            | 1.46.E+09            | 1.47.E+09            | 1.44.E+09            | 1.48.E+09            | 1.33.E+09            | 1.41.E+09            | 1.43.E+09            |
| 275 | P05198    | Eukaryotic translation initiation factor 2 subunit 1 [OS=Homo sapiens]                     | 198.93        | 1.75.E+09         | 1.75.E+09         | 1.79.E+09         | 1.77.E+09         | 1.82.E+09            | 1.81.E+09            | 1.77.E+09            | 1.83.E+09            | 1.70.E+09            | 1.75.E+09            | 1.79.E+09            | 1.77.E+09            |
| 276 | Q08J23    | tRNA (Cytosine(34)-C(5))-methyltransferase [OS=Homo sapiens]                               | 198.877       | 9.35.E+08         | 8.57.E+08         | 8.65.E+08         | 8.67.E+08         | 7.68.E+08            | 7.74.E+08            | 7.57.E+08            | 7.79.E+08            | 7.86.E+08            | 7.52.E+08            | 7.49.E+08            | 8.20.E+08            |
| 277 | P31943    | Heterogeneous nuclear ribonucleoprotein H [OS=Homo sapiens]                                | 198.238       | 2.19.E+09         | 2.22.E+09         | 2.23.E+09         | 2.18.E+09         | 1.98.E+09            | 2.00.E+09            | 1.98.E+09            | 2.03.E+09            | 2.51.E+09            | 2.43.E+09            | 2.43.E+09            | 2.43.E+09            |
| 278 | Q14103    | heterogeneous nuclear ribonucleoprotein D0 [OS=Homo sapiens]                               | 196.578       | 4.40.E+09         | 4.55.E+09         | 4.46.E+09         | 4.26.E+09         | 4.42.E+09            | 4.42.E+09            | 4.42.E+09            | 4.49.E+09            | 4.80.E+09            | 4.64.E+09            | 4.62.E+09            | 4.71.E+09            |
| 279 | P62136-1  | serine/threonine-protein phosphatase PP1-alpha catalytic subunit [OS=Homo sapiens]         | 196.03        | 1.32.E+09         | 1.11.E+09         | 1.10.E+09         | 1.21.E+09         | 1.26.E+09            | 1.20.E+09            | 1.22.E+09            | 1.28.E+09            | 1.23.E+09            | 1.21.E+09            | 1.19.E+09            | 1.10.E+09            |
| 280 | Q99623    | Prohibitin-2 [OS=Homo sapiens]                                                             | 195.682       | 2.69.E+09         | 2.41.E+09         | 2.30.E+09         | 2.29.E+09         | 2.12.E+09            | 2.02.E+09            | 2.18.E+09            | 2.21.E+09            | 2.38.E+09            | 2.26.E+09            | 2.46.E+09            | 2.34.E+09            |
| 281 | O60664-1  | Perilipin-3 [OS=Homo sapiens]                                                              | 194.807       | 8.34.E+08         | 8.25.E+08         | 8.37.E+08         | 9.68.E+08         | 8.91.E+08            | 8.55.E+08            | 8.85.E+08            | 8.73.E+08            | 1.13.E+09            | 1.17.E+09            | 1.05.E+09            | 1.02.E+09            |
| 282 | P55884    | Eukaryotic translation initiation factor 3 subunit B [OS=Homo sapiens]                     | 193.976       | 1.18.E+09         | 1.10.E+09         | 1.09.E+09         | 1.10.E+09         | 1.08.E+09            | 1.10.E+09            | 9.88.E+08            | 1.03.E+09            | 1.25.E+09            | 1.30.E+09            | 1.28.E+09            | 1.23.E+09            |
| 283 | Q27J81    | Inverted formin-2 [OS=Homo sapiens]                                                        | 193.794       | 3.14.E+08         | 2.83.E+08         | 2.67.E+08         | 3.21.E+08         | 3.27.E+08            | 3.81.E+08            | 3.67.E+08            | 4.01.E+08            | 3.68.E+08            | 3.76.E+08            | 4.18.E+08            | 3.82.E+08            |
| 284 | Q15181    | Inorganic pyrophosphatase [OS=Homo sapiens]                                                | 193.374       | 2.14.E+09         | 2.10.E+09         | 2.10.E+09         | 2.01.E+09         | 2.35.E+09            | 2.28.E+09            | 2.36.E+09            | 2.35.E+09            | 2.41.E+09            | 2.31.E+09            | 2.31.E+09            | 2.35.E+09            |
| 285 | P54577    | Tyrosine--tRNA ligase, cytoplasmic [OS=Homo sapiens]                                       | 192.478       | 2.06.E+09         | 1.99.E+09         | 1.95.E+09         | 1.86.E+09         | 2.00.E+09            | 2.22.E+09            | 2.08.E+09            | 1.97.E+09            | 2.06.E+09            | 2.17.E+09            | 2.02.E+09            | 2.11.E+09            |
| 286 | Q6P2Q9    | Pre-mRNA-processing-splicing factor 8 [OS=Homo sapiens]                                    | 191.415       | 8.25.E+08         | 7.29.E+08         | 8.63.E+08         | 9.83.E+08         | 8.38.E+08            | 8.86.E+08            | 9.40.E+08            | 9.03.E+08            | 7.93.E+08            | 8.74.E+08            | 7.84.E+08            | 7.05.E+08            |
| 287 | P62140    | Serine/threonine-protein phosphatase PP1-beta catalytic subunit [OS=Homo sapiens]          | 191.257       | 1.36.E+08         | 1.49.E+08         | 1.39.E+08         | 1.56.E+08         | 1.30.E+08            | 1.30.E+08            | 1.30.E+08            | 1.36.E+08            | 1.63.E+08            | 1.50.E+08            | 1.62.E+08            | 1.68.E+08            |
| 288 | Q9P2J5    | Leucine--tRNA ligase, cytoplasmic [OS=Homo sapiens]                                        | 190.993       | 1.03.E+09         | 1.04.E+09         | 1.16.E+09         | 1.21.E+09         | 9.16.E+08            | 9.70.E+08            | 8.18.E+08            | 8.83.E+08            | 1.20.E+09            | 1.25.E+09            | 1.15.E+09            | 1.24.E+09            |
| 289 | P62917    | 60S ribosomal protein L8 [OS=Homo sapiens]                                                 | 188.162       | 2.46.E+09         | 2.41.E+09         | 2.51.E+09         | 2.70.E+09         | 2.34.E+09            | 2.36.E+09            | 2.31.E+09            | 2.40.E+09            | 2.19.E+09            | 2.30.E+09            | 2.30.E+09            | 2.33.E+09            |
| 290 | Q13310    | Polyadenylate-binding protein 4 [OS=Homo sapiens]                                          | 187.826       | 3.30.E+08         | 3.24.E+08         | 3.30.E+08         | 3.52.E+08         | 3.48.E+08            | 3.11.E+08            | 3.37.E+08            | 3.40.E+08            | 3.33.E+08            | 3.23.E+08            | 3.34.E+08            | 3.27.E+08            |
| 291 | Q9Y2X3    | Nucleolar protein 58 [OS=Homo sapiens]                                                     | 185.945       | 9.31.E+08         | 9.06.E+08         | 9.29.E+08         | 9.01.E+08         | 6.68.E+08            | 6.70.E+08            | 6.64.E+08            | 6.89.E+08            | 8.68.E+08            | 8.47.E+08            | 8.12.E+08            | 8.14.E+08            |
| 292 | Q15293    | Reticulocalbin-1 [OS=Homo sapiens]                                                         | 185.081       | 1.58.E+09         | 1.66.E+09         | 1.66.E+09         | 1.66.E+09         | 1.92.E+09            | 1.97.E+09            | 1.93.E+09            | 2.03.E+09            | 1.70.E+09            | 1.76.E+09            | 1.82.E+09            | 1.70.E+09            |

Supplemental Data 1. List of identified proteins

| No. | Accession | Description                                                                                      | Sum PEP Score | CTRL Abundances_1 | CTRL Abundances_2 | CTRL Abundances_3 | CTRL Abundances_4 | CLDN6-1 Abundances_1 | CLDN6-1 Abundances_2 | CLDN6-1 Abundances_3 | CLDN6-1 Abundances_4 | CLDN6-2 Abundances_1 | CLDN6-2 Abundances_2 | CLDN6-2 Abundances_3 | CLDN6-2 Abundances_4 |
|-----|-----------|--------------------------------------------------------------------------------------------------|---------------|-------------------|-------------------|-------------------|-------------------|----------------------|----------------------|----------------------|----------------------|----------------------|----------------------|----------------------|----------------------|
| 293 | P32322    | Pyroline-5-carboxylate reductase 1, mitochondrial [OS=Homo sapiens]                              | 185.069       | 1.35.E+09         | 1.34.E+09         | 1.37.E+09         | 1.33.E+09         | 1.05.E+09            | 1.07.E+09            | 1.11.E+09            | 1.14.E+09            | 9.73.E+08            | 1.01.E+09            | 1.03.E+09            | 1.05.E+09            |
| 294 | P21796    | voltage-dependent anion-selective channel protein 1 [OS=Homo sapiens]                            | 184.778       | 2.94.E+09         | 3.50.E+09         | 3.41.E+09         | 3.27.E+09         | 3.05.E+09            | 2.60.E+09            | 3.08.E+09            | 3.08.E+09            | 3.08.E+09            | 3.41.E+09            | 3.30.E+09            | 3.30.E+09            |
| 295 | P58107    | epiplakin [OS=Homo sapiens]                                                                      | 184.38        | 3.60.E+08         | 2.45.E+08         | 3.13.E+08         | 3.61.E+08         | 2.50.E+08            | 2.72.E+08            | 2.67.E+08            | 2.33.E+08            | 5.61.E+07            | 3.90.E+07            | 5.02.E+07            | 4.33.E+07            |
| 296 | O00764-1  | Pyridoxal kinase [OS=Homo sapiens]                                                               | 184.194       | 8.37.E+08         | 7.62.E+08         | 7.26.E+08         | 8.29.E+08         | 7.98.E+08            | 7.43.E+08            | 7.59.E+08            | 7.30.E+08            | 1.07.E+09            | 1.03.E+09            | 1.04.E+09            | 1.10.E+09            |
| 297 | P33176    | Kinesin-1 heavy chain [OS=Homo sapiens]                                                          | 183.688       | 4.04.E+08         | 3.91.E+08         | 4.19.E+08         | 4.93.E+08         | 3.99.E+08            | 4.03.E+08            | 3.98.E+08            | 4.93.E+08            | 4.74.E+08            | 5.14.E+08            | 4.24.E+08            | 4.18.E+08            |
| 298 | P50454    | Serpin H1 [OS=Homo sapiens]                                                                      | 183.547       | 9.34.E+08         | 8.29.E+08         | 1.03.E+09         | 8.67.E+08         | 1.25.E+09            | 1.24.E+09            | 1.26.E+09            | 1.21.E+09            | 1.11.E+09            | 1.24.E+09            | 1.14.E+09            | 1.17.E+09            |
| 299 | Q15029    | 116 kDa U5 small nuclear ribonucleoprotein component [OS=Homo sapiens]                           | 183.026       | 8.01.E+08         | 8.08.E+08         | 7.12.E+08         | 6.99.E+08         | 7.00.E+08            | 6.60.E+08            | 6.95.E+08            | 6.81.E+08            | 6.86.E+08            | 6.38.E+08            | 6.82.E+08            | 6.74.E+08            |
| 300 | P55786    | puromycin-sensitive aminopeptidase [OS=Homo sapiens]                                             | 182.981       | 1.03.E+09         | 1.01.E+09         | 1.03.E+09         | 1.10.E+09         | 1.03.E+09            | 9.94.E+08            | 9.83.E+08            | 9.96.E+08            | 1.12.E+09            | 1.14.E+09            | 1.16.E+09            | 1.21.E+09            |
| 301 | P09104    | Gamma-enolase [OS=Homo sapiens]                                                                  | 182.595       | 1.25.E+09         | 1.36.E+09         | 1.38.E+09         | 1.45.E+09         | 1.40.E+09            | 1.70.E+09            | 1.40.E+09            | 1.56.E+09            | 1.66.E+09            | 2.06.E+09            | 1.77.E+09            | 1.61.E+09            |
| 302 | P16402    | Histone H1.3 [OS=Homo sapiens]                                                                   | 182.333       | 2.20.E+08         | 2.28.E+08         | 2.28.E+08         | 2.43.E+08         | 1.19.E+08            | 1.09.E+08            | 1.37.E+08            | 1.43.E+08            | 1.83.E+08            | 1.73.E+08            | 1.73.E+08            | 1.73.E+08            |
| 303 | P53618    | Coatomer subunit beta [OS=Homo sapiens]                                                          | 181.538       | 8.68.E+08         | 8.39.E+08         | 8.02.E+08         | 8.92.E+08         | 8.86.E+08            | 9.28.E+08            | 9.82.E+08            | 9.32.E+08            | 9.90.E+08            | 1.08.E+09            | 1.07.E+09            | 1.08.E+09            |
| 304 | P01892    | HLA class I histocompatibility antigen, A-2 alpha chain [OS=Homo sapiens]                        | 181.459       | 7.67.E+08         | 8.33.E+08         | 9.56.E+08         | 8.28.E+08         | 8.88.E+08            | 9.18.E+08            | 8.69.E+08            | 9.01.E+08            | 1.58.E+09            | 1.62.E+09            | 1.65.E+09            | 1.64.E+09            |
| 305 | P40939    | Trifunctional enzyme subunit alpha, mitochondrial [OS=Homo sapiens]                              | 181.384       | 6.72.E+08         | 6.05.E+08         | 5.62.E+08         | 6.32.E+08         | 5.39.E+08            | 5.34.E+08            | 5.19.E+08            | 4.93.E+08            | 7.31.E+08            | 7.53.E+08            | 6.96.E+08            | 7.59.E+08            |
| 306 | Q9UHD8-1  | Septin-9 [OS=Homo sapiens]                                                                       | 181.106       | 9.88.E+08         | 9.94.E+08         | 9.98.E+08         | 1.01.E+09         | 1.12.E+09            | 1.17.E+09            | 1.20.E+09            | 1.20.E+09            | 8.30.E+08            | 8.66.E+08            | 8.93.E+08            | 8.46.E+08            |
| 307 | P35232    | Prohibitin [OS=Homo sapiens]                                                                     | 180.995       | 2.66.E+09         | 2.55.E+09         | 2.57.E+09         | 2.56.E+09         | 2.23.E+09            | 2.15.E+09            | 2.14.E+09            | 2.24.E+09            | 2.48.E+09            | 2.40.E+09            | 2.47.E+09            | 2.56.E+09            |
| 308 | Q16822    | Phosphoenolpyruvate carboxykinase [GTP], mitochondrial OS=Homo sapiens OX=9606 GN=PCK2 PE=1 SV=4 | 180.629       | 1.22.E+09         | 1.13.E+09         | 1.12.E+09         | 1.23.E+09         | 9.91.E+08            | 1.07.E+09            | 8.49.E+08            | 9.18.E+08            | 8.09.E+08            | 7.53.E+08            | 8.15.E+08            | 8.16.E+08            |
| 309 | Q14166    | Tubulin-tyrosine ligase-like protein 12 [OS=Homo sapiens]                                        | 179.681       | 5.48.E+08         | 5.67.E+08         | 5.35.E+08         | 5.22.E+08         | 6.40.E+08            | 6.15.E+08            | 5.98.E+08            | 5.88.E+08            | 6.32.E+08            | 6.19.E+08            | 6.14.E+08            | 6.39.E+08            |
| 310 | Q96AE4    | Far upstream element-binding protein 1 [OS=Homo sapiens]                                         | 179.634       | 1.97.E+09         | 2.05.E+09         | 1.86.E+09         | 1.98.E+09         | 1.57.E+09            | 1.64.E+09            | 1.58.E+09            | 1.63.E+09            | 1.96.E+09            | 1.91.E+09            | 1.98.E+09            | 1.78.E+09            |
| 311 | Q99460    | 26S proteasome non-ATPase regulatory subunit 1 [OS=Homo sapiens]                                 | 179.1         | 6.93.E+08         | 6.88.E+08         | 6.51.E+08         | 6.40.E+08         | 6.63.E+08            | 7.65.E+08            | 7.12.E+08            | 7.12.E+08            | 7.68.E+08            | 8.04.E+08            | 7.83.E+08            | 7.50.E+08            |
| 312 | Q99497    | protein DJ-1 [OS=Homo sapiens]                                                                   | 178.669       | 2.17.E+09         | 2.07.E+09         | 2.13.E+09         | 2.21.E+09         | 2.19.E+09            | 2.16.E+09            | 2.23.E+09            | 2.19.E+09            | 2.42.E+09            | 2.52.E+09            | 2.62.E+09            | 2.68.E+09            |
| 313 | P43686    | 26S proteasome regulatory subunit 6B [OS=Homo sapiens]                                           | 176.632       | 7.42.E+08         | 7.06.E+08         | 6.55.E+08         | 7.20.E+08         | 7.15.E+08            | 6.58.E+08            | 6.63.E+08            | 6.99.E+08            | 7.81.E+08            | 8.36.E+08            | 7.08.E+08            | 7.10.E+08            |
| 314 | P14868    | Aspartate-tRNA ligase, cytoplasmic [OS=Homo sapiens]                                             | 175.375       | 1.75.E+09         | 1.80.E+09         | 1.79.E+09         | 1.81.E+09         | 1.70.E+09            | 1.69.E+09            | 1.68.E+09            | 1.75.E+09            | 2.07.E+09            | 2.06.E+09            | 2.11.E+09            | 2.11.E+09            |
| 315 | P13804-1  | Electron transfer flavoprotein subunit alpha, mitochondrial [OS=Homo sapiens]                    | 175.351       | 6.82.E+08         | 6.18.E+08         | 6.00.E+08         | 6.14.E+08         | 8.22.E+08            | 8.01.E+08            | 8.11.E+08            | 7.77.E+08            | 7.60.E+08            | 7.19.E+08            | 7.69.E+08            | 7.46.E+08            |
| 316 | Q02878    | 60S ribosomal protein L6 [OS=Homo sapiens]                                                       | 175.138       | 2.91.E+09         | 3.00.E+09         | 3.17.E+09         | 3.19.E+09         | 2.97.E+09            | 3.13.E+09            | 3.09.E+09            | 3.19.E+09            | 2.62.E+09            | 3.05.E+09            | 2.98.E+09            | 2.95.E+09            |
| 317 | P61158    | actin-related protein 3 [OS=Homo sapiens]                                                        | 175.129       | 7.43.E+08         | 6.76.E+08         | 7.76.E+08         | 7.60.E+08         | 8.34.E+08            | 8.58.E+08            | 8.84.E+08            | 8.71.E+08            | 7.94.E+08            | 9.14.E+08            | 8.71.E+08            | 8.66.E+08            |
| 318 | P30044-1  | Peroxisomal protein L6 [OS=Homo sapiens]                                                         | 174.791       | 2.48.E+09         | 2.26.E+09         | 2.30.E+09         | 2.19.E+09         | 2.71.E+09            | 2.66.E+09            | 2.74.E+09            | 2.66.E+09            | 2.77.E+09            | 2.73.E+09            | 2.61.E+09            | 2.63.E+09            |
| 319 | P15121    | aldose reductase [OS=Homo sapiens]                                                               | 174.326       | 1.63.E+09         | 1.67.E+09         | 1.74.E+09         | 1.76.E+09         | 2.84.E+09            | 2.87.E+09            | 2.89.E+09            | 2.98.E+09            | 2.72.E+09            | 2.84.E+09            | 2.89.E+09            | 2.93.E+09            |
| 320 | Q15393-1  | Splicing factor 3B subunit 3 [OS=Homo sapiens]                                                   | 173.252       | 1.08.E+09         | 1.11.E+09         | 1.09.E+09         | 1.10.E+09         | 8.85.E+08            | 8.88.E+08            | 9.19.E+08            | 9.81.E+08            | 1.25.E+09            | 1.18.E+09            | 1.06.E+09            | 1.09.E+09            |
| 321 | P54136-1  | arginine-tRNA ligase, cytoplasmic [OS=Homo sapiens]                                              | 173.249       | 9.41.E+08         | 9.54.E+08         | 9.63.E+08         | 9.85.E+08         | 7.99.E+08            | 9.16.E+08            | 9.01.E+08            | 8.99.E+08            | 9.41.E+08            | 9.50.E+08            | 9.56.E+08            | 9.41.E+08            |
| 322 | P23526-1  | Adenosylhomocysteinase [OS=Homo sapiens]                                                         | 172.227       | 3.51.E+09         | 3.62.E+09         | 3.77.E+09         | 3.69.E+09         | 3.93.E+09            | 3.99.E+09            | 3.98.E+09            | 4.12.E+09            | 3.99.E+09            | 4.19.E+09            | 4.20.E+09            | 3.98.E+09            |
| 323 | P47897    | glutamine-tRNA ligase [OS=Homo sapiens]                                                          | 171.292       | 6.48.E+08         | 7.65.E+08         | 7.72.E+08         | 7.92.E+08         | 7.67.E+08            | 6.92.E+08            | 7.19.E+08            | 6.67.E+08            | 6.70.E+08            | 6.66.E+08            | 8.00.E+08            | 6.91.E+08            |
| 324 | O00567    | Nucleolar protein 56 [OS=Homo sapiens]                                                           | 170.901       | 8.74.E+08         | 7.62.E+08         | 7.75.E+08         | 8.11.E+08         | 6.99.E+08            | 6.55.E+08            | 6.76.E+08            | 6.69.E+08            | 6.93.E+08            | 7.32.E+08            | 7.34.E+08            | 7.36.E+08            |
| 325 | P17174    | Aspartate aminotransferase, cytoplasmic [OS=Homo sapiens]                                        | 170.556       | 1.50.E+09         | 1.35.E+09         | 1.43.E+09         | 1.45.E+09         | 1.33.E+09            | 1.37.E+09            | 1.34.E+09            | 1.28.E+09            | 1.09.E+09            | 1.27.E+09            | 1.19.E+09            | 1.21.E+09            |
| 326 | P42167    | Lamina-associated polypeptide 2, isoforms beta/gamma [OS=Homo sapiens]                           | 170.294       | 6.34.E+08         | 6.40.E+08         | 5.03.E+08         | 6.03.E+08         | 4.35.E+08            | 4.72.E+08            | 4.37.E+08            | 4.45.E+08            | 5.03.E+08            | 4.68.E+08            | 5.37.E+08            | 6.05.E+08            |
| 327 | P16401    | Histone H1.5 [OS=Homo sapiens]                                                                   | 169.437       | 4.21.E+09         | 4.43.E+09         | 4.60.E+09         | 4.51.E+09         | 3.62.E+09            | 3.74.E+09            | 3.68.E+09            | 3.92.E+09            | 4.26.E+09            | 4.66.E+09            | 4.78.E+09            | 4.63.E+09            |
| 328 | Q92973-1  | transportin-1 [OS=Homo sapiens]                                                                  | 168.306       | 1.08.E+09         | 1.19.E+09         | 1.19.E+09         | 1.22.E+09         | 1.32.E+09            | 1.30.E+09            | 1.30.E+09            | 1.26.E+09            | 1.10.E+09            | 1.07.E+09            | 1.02.E+09            | 1.05.E+09            |
| 329 | Q8NC51-1  | Plasminogen activator inhibitor 1 RNA-binding protein [OS=Homo sapiens]                          | 166.316       | 1.01.E+09         | 9.43.E+08         | 9.80.E+08         | 1.00.E+09         | 1.02.E+09            | 1.05.E+09            | 1.02.E+09            | 9.96.E+08            | 9.08.E+08            | 9.49.E+08            | 9.15.E+08            | 9.29.E+08            |
| 330 | P29692    | Elongation factor 1-delta [OS=Homo sapiens]                                                      | 165.798       | 2.30.E+09         | 2.42.E+09         | 2.42.E+09         | 2.36.E+09         | 2.38.E+09            | 2.44.E+09            | 2.43.E+09            | 2.43.E+09            | 2.46.E+09            | 2.54.E+09            | 2.49.E+09            | 2.50.E+09            |
| 331 | P25398    | 40S ribosomal protein S12 [OS=Homo sapiens]                                                      | 164.686       | 3.61.E+09         | 3.67.E+09         | 3.62.E+09         | 3.83.E+09         | 3.43.E+09            | 3.41.E+09            | 3.50.E+09            | 3.59.E+09            | 3.45.E+09            | 3.36.E+09            | 3.27.E+09            | 3.27.E+09            |
| 332 | P62081    | 40S ribosomal protein S7 [OS=Homo sapiens]                                                       | 164.311       | 3.36.E+09         | 2.92.E+09         | 3.07.E+09         | 3.36.E+09         | 3.27.E+09            | 3.24.E+09            | 3.23.E+09            | 2.88.E+09            | 2.66.E+09            | 2.68.E+09            | 2.82.E+09            | 2.78.E+09            |
| 333 | Q9UG18    | Testin [OS=Homo sapiens]                                                                         | 163.897       | 5.70.E+08         | 5.87.E+08         | 5.86.E+08         | 5.92.E+08         | 5.98.E+08            | 5.85.E+08            | 5.91.E+08            | 5.91.E+08            | 5.90.E+08            | 5.80.E+08            | 5.33.E+08            | 5.50.E+08            |
| 334 | P62906    | 60S ribosomal protein L10A [OS=Homo sapiens]                                                     | 163.842       | 3.62.E+09         | 3.70.E+09         | 3.59.E+09         | 3.47.E+09         | 3.44.E+09            | 3.39.E+09            | 3.35.E+09            | 3.43.E+09            | 3.33.E+09            | 3.26.E+09            | 3.26.E+09            | 3.18.E+09            |
| 335 | P48163    | NADP-dependent malic enzyme [OS=Homo sapiens]                                                    | 162.432       | 3.65.E+08         | 3.38.E+08         | 3.48.E+08         | 3.26.E+08         | 3.35.E+08            | 3.16.E+08            | 2.98.E+08            | 3.25.E+08            | 2.71.E+08            | 3.16.E+08            | 2.65.E+08            | 2.89.E+08            |
| 336 | Q9NY33    | dipeptidyl peptidase 3 [OS=Homo sapiens]                                                         | 162.227       | 6.88.E+08         | 7.56.E+08         | 6.97.E+08         | 7.41.E+08         | 7.25.E+08            | 6.39.E+08            | 6.83.E+08            | 7.00.E+08            | 7.59.E+08            | 6.84.E+08            | 7.94.E+08            | 9.18.E+08            |
| 337 | O00299    | chloride intracellular channel protein 1 [OS=Homo sapiens]                                       | 161.662       | 1.24.E+09         | 1.21.E+09         | 1.25.E+09         | 1.26.E+09         | 1.77.E+09            | 1.70.E+09            | 1.73.E+09            | 1.75.E+09            | 1.50.E+09            | 1.55.E+09            | 1.58.E+09            | 1.65.E+09            |
| 338 | P15531    | Nucleoside diphosphate kinase A [OS=Homo sapiens]                                                | 161.4         | 2.14.E+08         | 2.26.E+08         | 2.14.E+08         | 2.27.E+08         | 3.35.E+08            | 3.19.E+08            | 3.09.E+08            | 3.11.E+08            | 2.91.E+08            | 2.58.E+08            | 2.70.E+08            | 2.42.E+08            |
| 339 | P62873    | Guanine nucleotide-binding protein G(I)/G(S)/G(T) subunit beta-1 [OS=Homo sapiens]               | 159.989       | 6.21.E+08         | 6.41.E+08         | 5.93.E+08         | 6.84.E+08         | 1.19.E+09            | 6.35.E+08            | 6.31.E+08            | 6.18.E+08            | 1.02.E+09            | 5.67.E+08            | 5.68.E+08            | 6.17.E+08            |
| 340 | Q14980-1  | nuclear mitotic apparatus protein 1 [OS=Homo sapiens]                                            | 159.644       | 5.07.E+08         | 5.15.E+08         | 5.19.E+08         | 5.24.E+08         | 5.23.E+08            | 4.97.E+08            | 5.26.E+08            | 4.88.E+08            | 6.15.E+08            | 5.99.E+08            | 5.78.E+08            | 5.57.E+08            |
| 341 | O43390-2  | Isoform 2 of Heterogeneous nuclear ribonucleoprotein R [OS=Homo sapiens]                         | 158.636       | 1.15.E+07         | 1.07.E+07         | 9.48.E+06         | 1.36.E+07         | 8.60.E+06            | 1.15.E+07            | 1.20.E+07            | 1.27.E+07            | 1.04.E+07            | 1.23.E+07            | 1.08.E+07            | 9.09.E+06            |
| 342 | P09493-5  | Isoform 5 of Tropomyosin alpha-1 chain [OS=Homo sapiens]                                         | 158.462       | 1.49.E+07         | 1.68.E+07         | 1.61.E+07         | 1.81.E+07         | 1.92.E+07            | 2.07.E+07            | 1.90.E+07            | 2.04.E+07            | 1.99.E+07            | 1.85.E+07            | 1.85.E+07            | 1.72.E+07            |
| 343 | P39687    | Acidic leucine-rich nuclear phosphoprotein 32 family member A [OS=Homo sapiens]                  | 158.196       | 2.78.E+09         | 2.73.E+09         | 2.76.E+09         | 2.70.E+09         | 2.66.E+09            | 2.57.E+09            | 2.56.E+09            | 2.59.E+09            | 3.02.E+09            | 3.04.E+09            | 2.98.E+09            | 3.08.E+09            |
| 344 | Q9Y310    | tRNA-splicing ligase RtcB homolog [OS=Homo sapiens]                                              | 157.833       | 5.52.E+08         | 5.23.E+08         | 5.47.E+08         | 4.98.E+08         | 5.20.E+08            | 5.63.E+08            | 5.08.E+08            | 5.00.E+08            | 5.65.E+08            | 5.70.E+08            | 5.46.E+08            | 5.09.E+08            |
| 345 | P62263    | 40S ribosomal protein S14 [OS=Homo sapiens]                                                      | 157.049       | 1.89.E+09         | 1.86.E+09         | 1.95.E+09         | 1.91.E+09         | 1.86.E+09            | 1.88.E+09            | 1.86.E+09            | 1.93.E+09            | 1.75.E+09            | 1.83.E+09            | 1.75.E+09            | 1.73.E+09            |
| 346 | Q9Y5B9    | FACT complex subunit SPT16 [OS=Homo sapiens]                                                     | 156.897       | 7.19.E+08         | 6.82.E+08         | 6.96.E+08         | 7.00.E+08         | 6.88.E+08            | 6.74.E+08            | 6.86.E+08            | 6.98.E+08            | 6.80.E+08            | 6.67.E+08            | 6.69.E+08            | 6.34.E+08            |
| 347 | P42330    | Aldo-keto reductase family 1 member C3 [OS=Homo sapiens]                                         | 156.566       | 1.03.E+08         | 1.03.E+08         | 1.01.E+08         | 1.02.E+08         | 5.54.E+08            | 5.30.E+08            | 4.33.E+08            | 4.90.E+08            | 1.88.E+08            | 1.72.E+08            | 1.72.E+08            | 1.71.E+08            |

| No. | Accession | Description                                                                      | Sum PEP Score | CTRL Abundances_1 | CTRL Abundances_2 | CTRL Abundances_3 | CTRL Abundances_4 | CLDN6-1 Abundances_1 | CLDN6-1 Abundances_2 | CLDN6-1 Abundances_3 | CLDN6-1 Abundances_4 | CLDN6-2 Abundances_1 | CLDN6-2 Abundances_2 | CLDN6-2 Abundances_3 | CLDN6-2 Abundances_4 |
|-----|-----------|----------------------------------------------------------------------------------|---------------|-------------------|-------------------|-------------------|-------------------|----------------------|----------------------|----------------------|----------------------|----------------------|----------------------|----------------------|----------------------|
| 348 | P09382    | Galectin-1 [OS=Homo sapiens]                                                     | 156.525       | 3.75.E+09         | 3.73.E+09         | 3.68.E+09         | 4.13.E+09         | 5.95.E+09            | 6.93.E+09            | 6.90.E+09            | 7.10.E+09            | 7.02.E+09            | 6.77.E+09            | 6.93.E+09            | 7.95.E+09            |
| 349 | Q02790    | Peptidyl-prolyl cis-trans isomerase FKBP4 [OS=Homo sapiens]                      | 155.905       | 9.84.E+08         | 9.83.E+08         | 1.07.E+09         | 9.85.E+08         | 8.76.E+08            | 9.26.E+08            | 8.85.E+08            | 8.97.E+08            | 8.42.E+08            | 8.78.E+08            | 8.55.E+08            | 9.07.E+08            |
| 350 | P07910-1  | Heterogeneous nuclear ribonucleoproteins C1/C2 [OS=Homo sapiens]                 | 155.725       | 4.50.E+07         | 1.65.E+07         | 3.49.E+07         | 3.68.E+07         | 5.43.E+07            | 4.66.E+07            | 4.05.E+07            | 4.43.E+07            | 4.56.E+07            | 4.55.E+07            | 3.02.E+07            | 5.01.E+07            |
| 351 | P10696    | Alkaline phosphatase, placental-like [OS=Homo sapiens]                           | 155.398       | 9.95.E+07         | 7.41.E+07         | 8.41.E+07         | 1.04.E+08         | 2.30.E+07            | 2.64.E+07            | 3.06.E+07            | 9.94.E+06            | 3.74.E+06            | 2.90.E+06            | 6.10.E+06            | 4.80.E+06            |
| 352 | O00148    | ATP-dependent RNA helicase DDX39A [OS=Homo sapiens]                              | 155.018       | 2.60.E+09         | 2.65.E+09         | 2.68.E+09         | 2.64.E+09         | 2.42.E+09            | 2.44.E+09            | 2.51.E+09            | 2.53.E+09            | 2.65.E+09            | 2.60.E+09            | 2.63.E+09            | 2.66.E+09            |
| 353 | Q9H4A4    | aminopeptidase B [OS=Homo sapiens]                                               | 155.006       | 7.40.E+08         | 8.07.E+08         | 8.29.E+08         | 8.02.E+08         | 9.44.E+08            | 9.11.E+08            | 8.82.E+08            | 8.49.E+08            | 8.78.E+08            | 8.68.E+08            | 8.52.E+08            | 8.64.E+08            |
| 354 | Q9BQG0    | Myb-binding protein 1A [OS=Homo sapiens]                                         | 154.803       | 5.76.E+08         | 4.72.E+08         | 4.94.E+08         | 4.57.E+08         | 4.92.E+08            | 4.17.E+08            | 4.47.E+08            | 3.77.E+08            | 3.81.E+08            | 3.72.E+08            | 3.55.E+08            | 3.57.E+08            |
| 355 | P24534    | Elongation factor 1-beta [OS=Homo sapiens]                                       | 154.629       | 2.80.E+09         | 2.77.E+09         | 2.74.E+09         | 2.70.E+09         | 2.68.E+09            | 2.66.E+09            | 2.65.E+09            | 2.67.E+09            | 2.91.E+09            | 2.90.E+09            | 2.89.E+09            | 3.06.E+09            |
| 356 | Q15019    | sepin-2 [OS=Homo sapiens]                                                        | 154.625       | 1.03.E+09         | 1.02.E+09         | 9.54.E+08         | 9.30.E+08         | 1.10.E+09            | 1.13.E+09            | 1.07.E+09            | 1.01.E+09            | 1.07.E+09            | 9.88.E+08            | 1.06.E+09            | 1.12.E+09            |
| 357 | Q3LXA3    | Triokinase/FMN cyclase [OS=Homo sapiens]                                         | 154.503       | 4.40.E+08         | 3.29.E+08         | 3.83.E+08         | 4.93.E+08         | 2.87.E+08            | 2.82.E+08            | 3.06.E+08            | 2.93.E+08            | 4.78.E+08            | 3.67.E+08            | 3.50.E+08            | 4.78.E+08            |
| 358 | P45974-1  | Ubiquitin carboxyl-terminal hydrolase 5 [OS=Homo sapiens]                        | 154.266       | 5.16.E+08         | 4.93.E+08         | 4.90.E+08         | 5.37.E+08         | 4.57.E+08            | 4.57.E+08            | 4.43.E+08            | 4.28.E+08            | 4.69.E+08            | 4.99.E+08            | 4.74.E+08            | 5.22.E+08            |
| 359 | Q9UMS4    | Pre-mRNA-processing factor 19 [OS=Homo sapiens]                                  | 153.329       | 7.85.E+08         | 7.73.E+08         | 8.27.E+08         | 7.89.E+08         | 6.51.E+08            | 6.46.E+08            | 5.64.E+08            | 5.89.E+08            | 7.56.E+08            | 7.34.E+08            | 7.65.E+08            | 7.33.E+08            |
| 360 | P38919    | Eukaryotic initiation factor 4A-III [OS=Homo sapiens]                            | 152.91        | 8.86.E+08         | 8.60.E+08         | 8.67.E+08         | 8.35.E+08         | 7.37.E+08            | 7.12.E+08            | 7.51.E+08            | 7.18.E+08            | 6.19.E+08            | 6.14.E+08            | 6.42.E+08            | 6.44.E+08            |
| 361 | P17980    | 26S proteasome regulatory subunit 6A [OS=Homo sapiens]                           | 152.287       | 4.98.E+08         | 4.53.E+08         | 4.26.E+08         | 4.83.E+08         | 3.96.E+08            | 4.67.E+08            | 4.52.E+08            | 4.15.E+08            | 5.25.E+08            | 4.73.E+08            | 4.76.E+08            | 5.08.E+08            |
| 362 | Q1KMD3    | heterogeneous nuclear ribonucleoprotein U-like protein 2 [OS=Homo sapiens]       | 151.65        | 6.91.E+08         | 7.27.E+08         | 7.03.E+08         | 7.03.E+08         | 7.39.E+08            | 7.57.E+08            | 7.51.E+08            | 7.01.E+08            | 7.28.E+08            | 7.13.E+08            | 7.12.E+08            | 7.45.E+08            |
| 363 | P13647    | keratin, type II cytoskeletal 5 [OS=Homo sapiens]                                | 150.996       | 4.01.E+07         | 3.23.E+07         | 2.53.E+07         | 4.08.E+07         | 9.54.E+07            | 9.10.E+07            | 1.27.E+08            | 1.05.E+08            | 2.04.E+07            | 1.44.E+07            | 1.50.E+07            | 5.44.E+06            |
| 364 | Q08945    | FACT complex subunit SSRP1 [OS=Homo sapiens]                                     | 150.488       | 7.83.E+08         | 7.67.E+08         | 8.89.E+08         | 7.71.E+08         | 7.50.E+08            | 6.97.E+08            | 7.19.E+08            | 7.28.E+08            | 7.53.E+08            | 7.49.E+08            | 8.02.E+08            | 7.60.E+08            |
| 365 | Q99613    | Eukaryotic translation initiation factor 3 subunit C [OS=Homo sapiens]           | 150.256       | 7.56.E+08         | 7.54.E+08         | 7.40.E+08         | 7.13.E+08         | 7.61.E+08            | 7.48.E+08            | 7.22.E+08            | 7.02.E+08            | 7.88.E+08            | 7.86.E+08            | 7.62.E+08            | 7.64.E+08            |
| 366 | P04040    | catalase [OS=Homo sapiens]                                                       | 149.628       | 8.12.E+08         | 8.55.E+08         | 8.26.E+08         | 8.68.E+08         | 6.26.E+08            | 6.16.E+08            | 6.32.E+08            | 6.42.E+08            | 7.50.E+08            | 7.87.E+08            | 7.66.E+08            | 7.89.E+08            |
| 367 | Q00796    | Sorbitol dehydrogenase [OS=Homo sapiens]                                         | 149.376       | 6.54.E+08         | 6.09.E+08         | 5.70.E+08         | 6.00.E+08         | 7.52.E+08            | 7.53.E+08            | 6.55.E+08            | 6.79.E+08            | 7.06.E+08            | 7.55.E+08            | 7.65.E+08            | 7.61.E+08            |
| 368 | P55795    | heterogeneous nuclear ribonucleoprotein H2 [OS=Homo sapiens]                     | 149.068       | 3.32.E+08         | 2.71.E+08         | 2.53.E+08         | 2.76.E+08         | 2.52.E+08            | 2.17.E+08            | 2.20.E+08            | 2.11.E+08            | 2.60.E+08            | 2.47.E+08            | 3.14.E+08            | 2.36.E+08            |
| 369 | P61221    | ATP-binding cassette sub-family E member 1 [OS=Homo sapiens]                     | 149.049       | 1.05.E+09         | 9.92.E+08         | 9.74.E+08         | 9.99.E+08         | 1.04.E+09            | 1.09.E+09            | 1.18.E+09            | 9.60.E+08            | 1.00.E+09            | 9.81.E+08            | 1.16.E+09            | 1.06.E+09            |
| 370 | P32969    | 60S ribosomal protein L9 [OS=Homo sapiens]                                       | 148.23        | 2.61.E+09         | 2.45.E+09         | 2.38.E+09         | 2.31.E+09         | 2.32.E+09            | 2.34.E+09            | 2.19.E+09            | 2.33.E+09            | 2.14.E+09            | 2.12.E+09            | 2.17.E+09            | 2.21.E+09            |
| 371 | P17858-1  | ATP-dependent 6-phosphofructokinase, liver type [OS=Homo sapiens]                | 148.209       | 2.98.E+08         | 2.95.E+08         | 2.58.E+08         | 2.49.E+08         | 2.88.E+08            | 2.73.E+08            | 2.11.E+08            | 2.80.E+08            | 2.61.E+08            | 2.95.E+08            | 3.62.E+08            | 2.86.E+08            |
| 372 | Q01469    | Fatty acid-binding protein, epidermal [OS=Homo sapiens]                          | 148.027       | 1.61.E+09         | 1.66.E+09         | 1.66.E+09         | 1.64.E+09         | 1.17.E+09            | 1.19.E+09            | 1.18.E+09            | 1.22.E+09            | 1.26.E+09            | 1.26.E+09            | 1.22.E+09            | 1.21.E+09            |
| 373 | P00505    | Aspartate aminotransferase, mitochondrial [OS=Homo sapiens]                      | 147.612       | 1.18.E+09         | 1.10.E+09         | 1.11.E+09         | 1.07.E+09         | 1.01.E+09            | 1.08.E+09            | 1.02.E+09            | 1.11.E+09            | 1.80.E+09            | 1.82.E+09            | 1.81.E+09            | 1.82.E+09            |
| 374 | P37837    | Transaldolase [OS=Homo sapiens]                                                  | 147.591       | 2.02.E+09         | 2.06.E+09         | 2.36.E+09         | 2.11.E+09         | 2.84.E+09            | 2.63.E+09            | 2.59.E+09            | 2.71.E+09            | 2.43.E+09            | 2.62.E+09            | 2.45.E+09            | 2.56.E+09            |
| 375 | Q14240-1  | eukaryotic initiation factor 4A-II [OS=Homo sapiens]                             | 147.57        | 5.22.E+07         | 5.74.E+07         | 6.60.E+07         | 6.49.E+07         | 4.86.E+07            | 6.02.E+07            | 5.76.E+07            | 5.86.E+07            | 1.01.E+08            | 1.08.E+08            | 1.21.E+08            | 1.23.E+08            |
| 376 | O15371    | Eukaryotic translation initiation factor 3 subunit D [OS=Homo sapiens]           | 147.551       | 5.49.E+08         | 5.16.E+08         | 4.98.E+08         | 5.43.E+08         | 4.99.E+08            | 4.11.E+08            | 4.97.E+08            | 4.72.E+08            | 5.18.E+08            | 5.32.E+08            | 5.13.E+08            | 5.49.E+08            |
| 377 | Q10471    | Polypeptide N-acetylglucosaminyltransferase 2 [OS=Homo sapiens]                  | 147.482       | 5.20.E+08         | 5.23.E+08         | 4.99.E+08         | 4.80.E+08         | 5.26.E+08            | 5.63.E+08            | 5.47.E+08            | 5.12.E+08            | 6.66.E+08            | 5.46.E+08            | 5.22.E+08            | 5.46.E+08            |
| 378 | P61586    | Transforming protein RhoA [OS=Homo sapiens]                                      | 147.264       | 1.53.E+09         | 1.58.E+09         | 1.50.E+09         | 1.52.E+09         | 1.83.E+09            | 1.84.E+09            | 1.81.E+09            | 1.78.E+09            | 1.64.E+09            | 1.50.E+09            | 1.57.E+09            | 1.48.E+09            |
| 379 | Q9HB71    | Calcyclin-binding protein [OS=Homo sapiens]                                      | 146.785       | 1.23.E+09         | 1.25.E+09         | 1.23.E+09         | 1.22.E+09         | 9.98.E+08            | 9.96.E+08            | 1.02.E+09            | 9.91.E+08            | 1.25.E+09            | 1.21.E+09            | 1.18.E+09            | 1.19.E+09            |
| 380 | P52292    | Importin subunit alpha-1 [OS=Homo sapiens]                                       | 146.765       | 6.99.E+08         | 6.87.E+08         | 7.33.E+08         | 7.22.E+08         | 5.78.E+08            | 5.98.E+08            | 6.25.E+08            | 6.13.E+08            | 7.66.E+08            | 7.99.E+08            | 8.61.E+08            | 8.29.E+08            |
| 381 | Q96776-1  | MMS19 nucleotide excision repair protein homolog [OS=Homo sapiens]               | 146.746       | 2.71.E+08         | 2.47.E+08         | 2.45.E+08         | 2.44.E+08         | 2.38.E+08            | 2.47.E+08            | 2.40.E+08            | 2.44.E+08            | 2.62.E+08            | 2.48.E+08            | 2.66.E+08            | 2.46.E+08            |
| 382 | O14818-1  | Proteasome subunit alpha type-7 [OS=Homo sapiens]                                | 146.484       | 1.11.E+09         | 1.08.E+09         | 1.10.E+09         | 1.11.E+09         | 1.02.E+09            | 9.76.E+08            | 9.95.E+08            | 9.90.E+08            | 1.17.E+09            | 1.14.E+09            | 1.12.E+09            | 1.12.E+09            |
| 383 | Q9H0A0    | RNA cytidine acetyltransferase [OS=Homo sapiens]                                 | 146.475       | 3.69.E+08         | 2.81.E+08         | 3.71.E+08         | 3.27.E+08         | 2.45.E+08            | 2.24.E+08            | 2.82.E+08            | 2.50.E+08            | 2.21.E+08            | 2.81.E+08            | 2.86.E+08            | 2.99.E+08            |
| 384 | P16615    | Sarcoplasmic/endoplasmic reticulum calcium ATPase 2 [OS=Homo sapiens]            | 146.151       | 5.93.E+08         | 5.99.E+08         | 6.17.E+08         | 6.27.E+08         | 6.28.E+08            | 6.25.E+08            | 6.63.E+08            | 6.35.E+08            | 6.29.E+08            | 6.00.E+08            | 6.20.E+08            | 6.73.E+08            |
| 385 | P12236    | ADP/ATP translocase 3 [OS=Homo sapiens]                                          | 145.994       | 2.87.E+09         | 2.85.E+09         | 2.90.E+09         | 3.00.E+09         | 3.30.E+09            | 3.36.E+09            | 3.30.E+09            | 3.29.E+09            | 3.12.E+09            | 3.19.E+09            | 3.20.E+09            | 3.22.E+09            |
| 386 | P07339    | Cathepsin D [OS=Homo sapiens]                                                    | 145.971       | 1.57.E+09         | 1.57.E+09         | 1.54.E+09         | 1.56.E+09         | 1.05.E+09            | 1.04.E+09            | 1.03.E+09            | 1.03.E+09            | 1.85.E+09            | 1.79.E+09            | 1.78.E+09            | 1.84.E+09            |
| 387 | P04632    | Calpain small subunit 1 [OS=Homo sapiens]                                        | 145.84        | 7.04.E+08         | 6.14.E+08         | 6.51.E+08         | 6.95.E+08         | 9.75.E+08            | 1.01.E+09            | 1.03.E+09            | 9.37.E+08            | 6.73.E+08            | 7.60.E+08            | 7.30.E+08            | 6.02.E+08            |
| 388 | P30040-1  | Endoplasmic reticulum resident protein 29 [OS=Homo sapiens]                      | 145.424       | 1.55.E+09         | 1.50.E+09         | 1.57.E+09         | 1.56.E+09         | 1.60.E+09            | 1.63.E+09            | 1.53.E+09            | 1.46.E+09            | 1.33.E+09            | 1.31.E+09            | 1.36.E+09            | 1.35.E+09            |
| 389 | P25786-1  | Proteasome subunit alpha type-1 [OS=Homo sapiens]                                | 145.151       | 1.35.E+09         | 1.31.E+09         | 1.29.E+09         | 1.26.E+09         | 1.21.E+09            | 1.21.E+09            | 1.17.E+09            | 1.21.E+09            | 1.34.E+09            | 1.31.E+09            | 1.31.E+09            | 1.31.E+09            |
| 390 | P10599-1  | thioredoxin [OS=Homo sapiens]                                                    | 144.801       | 6.04.E+09         | 5.63.E+09         | 5.15.E+09         | 5.30.E+09         | 7.50.E+09            | 6.18.E+09            | 6.59.E+09            | 6.05.E+09            | 5.44.E+09            | 4.79.E+09            | 5.61.E+09            | 4.88.E+09            |
| 391 | P07858    | Cathepsin B [OS=Homo sapiens]                                                    | 144.238       | 1.18.E+09         | 1.22.E+09         | 1.18.E+09         | 1.15.E+09         | 1.32.E+09            | 1.35.E+09            | 1.29.E+09            | 1.36.E+09            | 1.50.E+09            | 1.51.E+09            | 1.48.E+09            | 1.47.E+09            |
| 392 | Q9H0U4    | ras-related protein Rab-1B [OS=Homo sapiens]                                     | 144.155       | 3.41.E+08         | 3.30.E+08         | 2.90.E+08         | 3.42.E+08         | 3.74.E+08            | 3.63.E+08            | 3.35.E+08            | 3.22.E+08            | 3.70.E+08            | 3.16.E+08            | 3.02.E+08            | 3.14.E+08            |
| 393 | P49748-1  | Very long-chain specific acyl-CoA dehydrogenase, mitochondrial [OS=Homo sapiens] | 144.079       | 6.50.E+08         | 6.39.E+08         | 6.65.E+08         | 6.84.E+08         | 7.40.E+08            | 7.58.E+08            | 7.96.E+08            | 7.82.E+08            | 4.57.E+08            | 5.30.E+08            | 5.37.E+08            | 5.07.E+08            |
| 394 | P62277    | 40S ribosomal protein S13 [OS=Homo sapiens]                                      | 144.063       | 4.57.E+09         | 4.45.E+09         | 4.47.E+09         | 4.60.E+09         | 4.39.E+09            | 4.45.E+09            | 4.36.E+09            | 4.51.E+09            | 3.99.E+09            | 4.17.E+09            | 4.11.E+09            | 4.21.E+09            |
| 395 | P52788-1  | Spermine synthase [OS=Homo sapiens]                                              | 143.852       | 4.08.E+08         | 3.77.E+08         | 3.68.E+08         | 4.25.E+08         | 5.78.E+08            | 5.78.E+08            | 5.11.E+08            | 5.05.E+08            | 7.01.E+08            | 6.95.E+08            | 7.22.E+08            | 7.22.E+08            |
| 396 | P16989-1  | Y-box-binding protein 3 [OS=Homo sapiens]                                        | 143.454       | 8.44.E+07         | 9.17.E+07         | 8.78.E+07         | 6.58.E+07         | 7.69.E+07            | 7.17.E+07            | 9.62.E+07            | 5.51.E+07            | 8.93.E+07            | 7.18.E+07            | 5.91.E+07            | 7.12.E+07            |
| 397 | P26583    | High mobility group protein B2 [OS=Homo sapiens]                                 | 143.078       | 8.50.E+08         | 8.72.E+08         | 7.78.E+08         | 7.78.E+08         | 7.00.E+08            | 6.78.E+08            | 7.14.E+08            | 7.48.E+08            | 9.78.E+08            | 8.96.E+08            | 1.01.E+09            | 9.42.E+08            |
| 398 | P07741-1  | Adenine phosphoribosyltransferase [OS=Homo sapiens]                              | 143.008       | 1.18.E+09         | 1.03.E+09         | 1.13.E+09         | 9.65.E+08         | 9.33.E+08            | 7.66.E+08            | 7.17.E+08            | 9.75.E+08            | 1.91.E+09            | 1.58.E+09            | 1.53.E+09            | 1.91.E+09            |
| 399 | Q96QK1    | Vacuolar protein sorting-associated protein 35 [OS=Homo sapiens]                 | 142.562       | 7.03.E+08         | 5.92.E+08         | 6.16.E+08         | 5.81.E+08         | 5.75.E+08            | 5.93.E+08            | 6.66.E+08            | 7.49.E+08            | 8.74.E+08            | 8.88.E+08            | 8.37.E+08            | 8.97.E+08            |
| 400 | Q15366-6  | Isoform 6 of Poly(rC)-binding protein 2 [OS=Homo sapiens]                        | 142.129       | 1.76.E+09         | 1.51.E+09         | 1.65.E+09         | 1.59.E+09         | 1.56.E+09            | 1.62.E+09            | 1.58.E+09            | 1.64.E+09            | 1.68.E+09            | 1.55.E+09            | 1.55.E+09            | 1.60.E+09            |
| 401 | P60953    | Cell division control protein 42 homolog [OS=Homo sapiens]                       | 142.011       | 1.44.E+09         | 1.35.E+09         | 1.38.E+09         | 1.48.E+09         | 1.51.E+09            | 1.51.E+09            | 1.49.E+09            | 1.46.E+09            | 1.37.E+09            | 1.45.E+09            | 1.45.E+09            | 1.41.E+09            |
| 402 | P32119    | Peroxisomal protein 2 [OS=Homo sapiens]                                          | 140.895       | 1.34.E+09         | 1.06.E+09         | 1.22.E+09         | 1.38.E+09         | 1.32.E+09            | 1.32.E+09            | 1.30.E+09            | 1.18.E+09            | 1.44.E+09            | 1.38.E+09            | 1.40.E+09            | 1.42.E+09            |
| 403 | Q9UM47    | Neurogenic locus notch homolog protein 3 [OS=Homo sapiens]                       | 140.893       | 4.18.E+08         | 3.72.E+08         | 4.26.E+08         | 3.50.E+08         | 3.42.E+08            | 2.37.E+08            | 3.09.E+08            | 3.04.E+08            | 3.16.E+08            | 3.27.E+08            | 3.49.E+08            | 3.83.E+08            |

| No. | Accession | Description                                                                       | Sum PEP Score | CTRL Abundances_1 | CTRL Abundances_2 | CTRL Abundances_3 | CTRL Abundances_4 | CLDN6-1 Abundances_1 | CLDN6-1 Abundances_2 | CLDN6-1 Abundances_3 | CLDN6-1 Abundances_4 | CLDN6-2 Abundances_1 | CLDN6-2 Abundances_2 | CLDN6-2 Abundances_3 | CLDN6-2 Abundances_4 |
|-----|-----------|-----------------------------------------------------------------------------------|---------------|-------------------|-------------------|-------------------|-------------------|----------------------|----------------------|----------------------|----------------------|----------------------|----------------------|----------------------|----------------------|
| 404 | O75390    | citrate synthase, mitochondrial [OS=Homo sapiens]                                 | 140.766       | 1.81.E+09         | 1.58.E+09         | 1.55.E+09         | 1.47.E+09         | 1.87.E+09            | 1.75.E+09            | 1.75.E+09            | 1.83.E+09            | 1.72.E+09            | 1.60.E+09            | 1.64.E+09            | 1.59.E+09            |
| 405 | Q15758-1  | Neutral amino acid transporter B(0) [OS=Homo sapiens]                             | 140.533       | 1.30.E+09         | 1.24.E+09         | 1.15.E+09         | 1.41.E+09         | 2.28.E+09            | 2.54.E+09            | 2.00.E+09            | 1.90.E+09            | 8.90.E+08            | 7.73.E+08            | 6.95.E+08            | 8.20.E+08            |
| 406 | P62328    | Thymosin beta-4 [OS=Homo sapiens]                                                 | 140.37        | 3.20.E+09         | 3.33.E+09         | 3.27.E+09         | 3.37.E+09         | 2.76.E+09            | 2.79.E+09            | 2.77.E+09            | 2.85.E+09            | 3.58.E+09            | 3.48.E+09            | 3.47.E+09            | 3.38.E+09            |
| 407 | P00387    | NADH-cytochrome b5 reductase 3 [OS=Homo sapiens]                                  | 140.305       | 5.56.E+08         | 5.09.E+08         | 5.33.E+08         | 5.58.E+08         | 4.88.E+08            | 4.33.E+08            | 4.95.E+08            | 4.68.E+08            | 6.09.E+08            | 6.57.E+08            | 6.58.E+08            | 6.57.E+08            |
| 408 | P62241    | 40S ribosomal protein S8 [OS=Homo sapiens]                                        | 138.904       | 4.78.E+09         | 5.10.E+09         | 5.10.E+09         | 5.03.E+09         | 4.62.E+09            | 4.72.E+09            | 4.73.E+09            | 4.84.E+09            | 4.38.E+09            | 4.38.E+09            | 4.29.E+09            | 4.16.E+09            |
| 409 | Q9UL46    | proteasome activator complex subunit 2 [OS=Homo sapiens]                          | 137.987       | 4.56.E+08         | 3.87.E+08         | 4.13.E+08         | 4.22.E+08         | 4.10.E+08            | 4.10.E+08            | 4.15.E+08            | 3.88.E+08            | 5.10.E+08            | 5.19.E+08            | 5.25.E+08            | 5.11.E+08            |
| 410 | Q8TEX9-1  | Importin-4 [OS=Homo sapiens]                                                      | 137.936       | 2.67.E+08         | 1.87.E+08         | 2.26.E+08         | 2.64.E+08         | 2.02.E+08            | 2.30.E+08            | 2.49.E+08            | 2.11.E+08            | 2.51.E+08            | 2.44.E+08            | 2.56.E+08            | 2.33.E+08            |
| 411 | P62191    | 26S proteasome regulatory subunit 4 [OS=Homo sapiens]                             | 137.455       | 8.16.E+08         | 8.25.E+08         | 7.64.E+08         | 7.93.E+08         | 8.05.E+08            | 8.02.E+08            | 7.95.E+08            | 7.37.E+08            | 9.26.E+08            | 8.58.E+08            | 8.46.E+08            | 8.98.E+08            |
| 412 | P35637-1  | RNA-binding protein FUS [OS=Homo sapiens]                                         | 137.437       | 1.12.E+09         | 1.15.E+09         | 1.17.E+09         | 1.20.E+09         | 1.01.E+09            | 1.04.E+09            | 9.98.E+08            | 9.89.E+08            | 1.08.E+09            | 1.12.E+09            | 1.12.E+09            | 1.10.E+09            |
| 413 | P22087    | rRNA 2'-O-methyltransferase fibrillarin [OS=Homo sapiens]                         | 137.385       | 1.53.E+09         | 1.59.E+09         | 1.59.E+09         | 1.57.E+09         | 1.35.E+09            | 1.46.E+09            | 1.44.E+09            | 1.50.E+09            | 1.49.E+09            | 1.56.E+09            | 1.50.E+09            | 1.56.E+09            |
| 414 | Q13045-1  | protein flightless-1 homolog [OS=Homo sapiens]                                    | 136.349       | 5.36.E+08         | 5.08.E+08         | 4.11.E+08         | 5.16.E+08         | 6.46.E+08            | 7.00.E+08            | 6.80.E+08            | 6.57.E+08            | 5.21.E+08            | 3.90.E+08            | 4.53.E+08            | 4.77.E+08            |
| 415 | P07954    | fumarate hydratase, mitochondrial [OS=Homo sapiens]                               | 136.346       | 5.76.E+08         | 5.87.E+08         | 6.06.E+08         | 8.15.E+08         | 8.50.E+08            | 9.08.E+08            | 8.46.E+08            | 5.85.E+08            | 5.25.E+08            | 7.32.E+08            | 5.37.E+08            | 7.28.E+08            |
| 416 | Q14914    | Prostaglandin reductase 1 [OS=Homo sapiens]                                       | 136.312       | 7.59.E+08         | 7.16.E+08         | 7.09.E+08         | 6.95.E+08         | 1.27.E+09            | 1.29.E+09            | 1.29.E+09            | 1.31.E+09            | 8.25.E+08            | 7.75.E+08            | 7.65.E+08            | 7.89.E+08            |
| 417 | P30566    | adenylosuccinate lyase [OS=Homo sapiens]                                          | 135.56        | 4.12.E+08         | 3.52.E+08         | 3.74.E+08         | 4.20.E+08         | 3.55.E+08            | 3.69.E+08            | 3.79.E+08            | 3.40.E+08            | 4.79.E+08            | 4.67.E+08            | 4.57.E+08            | 5.01.E+08            |
| 418 | P11216    | Glycogen phosphorylase, brain form [OS=Homo sapiens]                              | 135.447       | 4.14.E+08         | 4.23.E+08         | 4.11.E+08         | 3.91.E+08         | 6.80.E+08            | 6.40.E+08            | 6.53.E+08            | 6.41.E+08            | 5.33.E+08            | 5.10.E+08            | 4.98.E+08            | 5.15.E+08            |
| 419 | Q6F1F3    | Histone H2A type 2-A [OS=Homo sapiens]                                            | 135.378       | 6.43.E+10         | 8.56.E+10         | 6.33.E+10         | 6.40.E+10         | 5.51.E+10            | 5.38.E+10            | 5.39.E+10            | 5.59.E+10            | 6.15.E+10            | 5.99.E+10            | 6.04.E+10            | 6.16.E+10            |
| 420 | P40925    | Malate dehydrogenase, cytoplasmic [OS=Homo sapiens]                               | 135.185       | 1.92.E+09         | 1.88.E+09         | 1.86.E+09         | 1.80.E+09         | 1.74.E+09            | 1.65.E+09            | 1.68.E+09            | 1.72.E+09            | 2.15.E+09            | 2.09.E+09            | 2.12.E+09            | 2.19.E+09            |
| 421 | O00410    | Importin-5 [OS=Homo sapiens]                                                      | 135.081       | 3.33.E+08         | 2.91.E+08         | 2.79.E+08         | 2.88.E+08         | 3.27.E+08            | 3.19.E+08            | 3.30.E+08            | 2.95.E+08            | 3.62.E+08            | 3.46.E+08            | 3.66.E+08            | 3.68.E+08            |
| 422 | P20042    | Eukaryotic translation initiation factor 2 subunit 2 [OS=Homo sapiens]            | 135.064       | 1.08.E+09         | 1.11.E+09         | 1.14.E+09         | 1.06.E+09         | 1.07.E+09            | 1.09.E+09            | 1.10.E+09            | 1.10.E+09            | 1.08.E+09            | 1.06.E+09            | 1.07.E+09            | 1.05.E+09            |
| 423 | P30086    | phosphatidylethanolamine-binding protein 1 [OS=Homo sapiens]                      | 134.169       | 1.41.E+09         | 1.47.E+09         | 1.45.E+09         | 1.41.E+09         | 1.17.E+09            | 1.18.E+09            | 1.16.E+09            | 1.16.E+09            | 1.59.E+09            | 1.55.E+09            | 1.53.E+09            | 1.57.E+09            |
| 424 | P13949    | protein S100-A11 [OS=Homo sapiens]                                                | 133.963       | 2.82.E+09         | 2.53.E+09         | 2.68.E+09         | 2.64.E+09         | 3.37.E+09            | 3.40.E+09            | 3.24.E+09            | 2.44.E+09            | 3.27.E+09            | 3.39.E+09            | 3.30.E+09            | 3.48.E+09            |
| 425 | Q9BUJ2-1  | Heterogeneous nuclear ribonucleoprotein U-like protein 1 [OS=Homo sapiens]        | 133.767       | 5.36.E+08         | 5.19.E+08         | 5.11.E+08         | 5.47.E+08         | 4.76.E+08            | 4.84.E+08            | 4.79.E+08            | 4.74.E+08            | 5.56.E+08            | 5.72.E+08            | 5.59.E+08            | 5.32.E+08            |
| 426 | Q5T4S7-1  | e3 ubiquitin-protein ligase UBR4 [OS=Homo sapiens]                                | 133.722       | 2.81.E+08         | 2.55.E+08         | 2.67.E+08         | 2.22.E+08         | 2.34.E+08            | 1.95.E+08            | 2.61.E+08            | 2.51.E+08            | 2.35.E+08            | 2.54.E+08            | 2.31.E+08            | 2.55.E+08            |
| 427 | Q16181    | Septin-7 [OS=Homo sapiens]                                                        | 133.559       | 6.28.E+08         | 6.13.E+08         | 6.15.E+08         | 6.10.E+08         | 6.43.E+08            | 6.34.E+08            | 6.38.E+08            | 6.21.E+08            | 6.29.E+08            | 6.18.E+08            | 6.16.E+08            | 6.27.E+08            |
| 428 | Q15366-4  | Isoform 4 of Poly(rC)-binding protein 2 [OS=Homo sapiens]                         | 133.497       | 2.45.E+08         | 1.92.E+08         | 2.03.E+08         | 2.01.E+08         | 2.15.E+08            | 2.07.E+08            | 2.07.E+08            | 1.87.E+08            | 1.79.E+08            | 1.65.E+08            | 1.66.E+08            | 1.88.E+08            |
| 429 | O60763-1  | General vesicular transport factor p115 [OS=Homo sapiens]                         | 133.139       | 4.90.E+08         | 4.21.E+08         | 3.16.E+08         | 3.89.E+08         | 3.65.E+08            | 2.93.E+08            | 3.16.E+08            | 2.99.E+08            | 4.65.E+08            | 4.63.E+08            | 3.74.E+08            | 4.52.E+08            |
| 430 | Q9Y230    | RuvB-like 2 [OS=Homo sapiens]                                                     | 133.072       | 7.03.E+08         | 8.49.E+08         | 8.00.E+08         | 7.93.E+08         | 6.76.E+08            | 6.32.E+08            | 6.81.E+08            | 6.49.E+08            | 7.16.E+08            | 7.20.E+08            | 7.47.E+08            | 7.38.E+08            |
| 431 | P15880    | 40S ribosomal protein S2 [OS=Homo sapiens]                                        | 132.675       | 3.42.E+09         | 3.55.E+09         | 3.62.E+09         | 3.65.E+09         | 3.50.E+09            | 3.55.E+09            | 3.51.E+09            | 3.60.E+09            | 3.21.E+09            | 3.39.E+09            | 3.40.E+09            | 3.32.E+09            |
| 432 | P08708    | 40S ribosomal protein S17 [OS=Homo sapiens]                                       | 132.238       | 1.87.E+09         | 1.71.E+09         | 1.83.E+09         | 1.76.E+09         | 1.74.E+09            | 1.75.E+09            | 1.72.E+09            | 1.75.E+09            | 1.65.E+09            | 1.65.E+09            | 1.69.E+09            | 1.63.E+09            |
| 433 | P33316-3  | Deoxyuridine 5'-triphosphate nucleotidohydrolase, mitochondrial [OS=Homo sapiens] | 131.299       | 1.73.E+09         | 1.64.E+09         | 1.71.E+09         | 1.85.E+09         | 1.78.E+09            | 1.81.E+09            | 1.83.E+09            | 1.82.E+09            | 1.65.E+09            | 1.65.E+09            | 1.61.E+09            | 1.71.E+09            |
| 434 | P18031    | Tyrosine-protein phosphatase non-receptor type 1 [OS=Homo sapiens]                | 131.042       | 6.07.E+08         | 6.47.E+08         | 5.97.E+08         | 6.17.E+08         | 5.77.E+08            | 5.66.E+08            | 5.30.E+08            | 5.32.E+08            | 1.04.E+09            | 1.08.E+09            | 1.07.E+09            | 1.08.E+09            |
| 435 | Q99873    | protein arginine N-methyltransferase 1 [OS=Homo sapiens]                          | 130.809       | 9.49.E+08         | 9.96.E+08         | 9.55.E+08         | 9.26.E+08         | 1.21.E+09            | 1.23.E+09            | 1.21.E+09            | 1.24.E+09            | 1.03.E+09            | 1.00.E+09            | 9.90.E+08            | 1.01.E+09            |
| 436 | P54920    | alpha-soluble nsf attachment protein [OS=Homo sapiens]                            | 130.804       | 3.50.E+08         | 3.93.E+08         | 4.12.E+08         | 3.85.E+08         | 5.10.E+08            | 5.14.E+08            | 5.03.E+08            | 4.83.E+08            | 3.57.E+08            | 3.56.E+08            | 3.67.E+08            | 3.27.E+08            |
| 437 | Q9UBT2    | SUMO-activating enzyme subunit 2 [OS=Homo sapiens]                                | 130.691       | 5.52.E+08         | 4.84.E+08         | 4.86.E+08         | 5.04.E+08         | 4.37.E+08            | 4.61.E+08            | 4.71.E+08            | 4.65.E+08            | 4.63.E+08            | 3.95.E+08            | 4.38.E+08            | 4.94.E+08            |
| 438 | P60660    | Myosin light polypeptide 6 [OS=Homo sapiens]                                      | 130.339       | 3.38.E+09         | 3.36.E+09         | 3.52.E+09         | 3.45.E+09         | 3.84.E+09            | 3.99.E+09            | 3.98.E+09            | 4.01.E+09            | 3.37.E+09            | 3.67.E+09            | 3.56.E+09            | 3.43.E+09            |
| 439 | O95336    | 6-phosphogluconolactonase [OS=Homo sapiens]                                       | 130.239       | 7.43.E+08         | 9.16.E+08         | 8.98.E+08         | 9.50.E+08         | 8.33.E+08            | 8.31.E+08            | 8.64.E+08            | 8.34.E+08            | 9.13.E+08            | 8.12.E+08            | 9.21.E+08            | 8.60.E+08            |
| 440 | P41567    | eukaryotic translation initiation factor 1 [OS=Homo sapiens]                      | 129.766       | 5.73.E+08         | 5.61.E+08         | 5.55.E+08         | 5.87.E+08         | 6.31.E+08            | 6.19.E+08            | 6.35.E+08            | 5.79.E+08            | 4.55.E+08            | 5.04.E+08            | 4.58.E+08            | 4.38.E+08            |
| 441 | O94925-3  | Isoform 3 of Glutaminase kidney isoform, mitochondrial [OS=Homo sapiens]          | 129.68        | 3.59.E+08         | 3.33.E+08         | 3.36.E+08         | 3.55.E+08         | 5.66.E+08            | 5.85.E+08            | 6.07.E+08            | 5.89.E+08            | 3.95.E+08            | 4.26.E+08            | 3.99.E+08            | 4.27.E+08            |
| 442 | Q04917    | 14-3-3 protein eta [OS=Homo sapiens]                                              | 129.47        | 3.35.E+08         | 2.93.E+08         | 3.40.E+08         | 3.31.E+08         | 4.56.E+08            | 4.51.E+08            | 4.39.E+08            | 4.49.E+08            | 3.57.E+08            | 3.91.E+08            | 3.99.E+08            | 3.66.E+08            |
| 443 | P62753    | 40S RIBOSOMAL PROTEIN S6 [OS=Homo sapiens]                                        | 129.348       | 2.48.E+09         | 2.59.E+09         | 2.41.E+09         | 2.63.E+09         | 2.33.E+09            | 2.42.E+09            | 2.38.E+09            | 2.42.E+09            | 2.20.E+09            | 2.38.E+09            | 2.35.E+09            | 2.34.E+09            |
| 444 | P68036    | Ubiquitin-conjugating enzyme E2 L3 [OS=Homo sapiens]                              | 129.225       | 8.60.E+08         | 6.34.E+08         | 6.71.E+08         | 7.38.E+08         | 6.70.E+08            | 6.78.E+08            | 6.87.E+08            | 6.39.E+08            | 7.75.E+08            | 7.32.E+08            | 7.36.E+08            | 8.17.E+08            |
| 445 | Q9Y265    | RuvB-like 1 [OS=Homo sapiens]                                                     | 129.22        | 1.03.E+09         | 1.02.E+09         | 1.07.E+09         | 9.19.E+08         | 9.74.E+08            | 9.65.E+08            | 9.32.E+08            | 8.21.E+08            | 1.07.E+09            | 1.04.E+09            | 1.02.E+09            | 1.04.E+09            |
| 446 | P42166    | Lamina-associated polypeptide 2, isoform alpha [OS=Homo sapiens]                  | 129.171       | 5.89.E+08         | 6.56.E+08         | 7.08.E+08         | 7.01.E+08         | 5.24.E+08            | 5.36.E+08            | 5.25.E+08            | 5.02.E+08            | 4.85.E+08            | 5.57.E+08            | 5.55.E+08            | 5.89.E+08            |
| 447 | Q00341-1  | Vigilin [OS=Homo sapiens]                                                         | 129.006       | 3.80.E+08         | 5.37.E+08         | 5.64.E+08         | 5.26.E+08         | 4.47.E+08            | 5.13.E+08            | 3.70.E+08            | 5.13.E+08            | 4.21.E+08            | 4.22.E+08            | 4.45.E+08            | 5.54.E+08            |
| 448 | O14579-1  | coatomer subunit epsilon [OS=Homo sapiens]                                        | 128.984       | 2.12.E+08         | 1.74.E+08         | 2.00.E+08         | 1.91.E+08         | 2.22.E+08            | 2.15.E+08            | 1.99.E+08            | 1.94.E+08            | 2.03.E+08            | 2.18.E+08            | 2.23.E+08            | 1.94.E+08            |
| 449 | Q9UNM6    | 26S proteasome non-ATPase regulatory subunit 13 [OS=Homo sapiens]                 | 128.949       | 6.19.E+08         | 6.28.E+08         | 5.63.E+08         | 6.05.E+08         | 6.32.E+08            | 6.12.E+08            | 5.87.E+08            | 5.89.E+08            | 6.87.E+08            | 6.44.E+08            | 6.36.E+08            | 6.39.E+08            |
| 450 | P16576-1  | Histone-binding protein RBBP7 [OS=Homo sapiens]                                   | 128.712       | 2.66.E+09         | 2.87.E+09         | 2.85.E+09         | 2.84.E+09         | 2.93.E+09            | 3.05.E+09            | 3.07.E+09            | 3.02.E+09            | 2.43.E+09            | 2.32.E+09            | 2.17.E+09            | 2.18.E+09            |
| 451 | P36776    | Lon protease homolog, mitochondrial [OS=Homo sapiens]                             | 128.687       | 3.20.E+08         | 2.52.E+08         | 2.70.E+08         | 2.85.E+08         | 3.02.E+08            | 3.17.E+08            | 2.65.E+08            | 2.41.E+08            | 2.79.E+08            | 2.55.E+08            | 2.29.E+08            | 2.41.E+08            |
| 452 | Q9NLY9    | tropomodulin-3 [OS=Homo sapiens]                                                  | 128.363       | 1.07.E+09         | 1.01.E+09         | 1.03.E+09         | 1.03.E+09         | 1.15.E+09            | 1.15.E+09            | 1.08.E+09            | 1.13.E+09            | 8.91.E+08            | 1.01.E+09            | 9.61.E+08            | 1.02.E+09            |
| 453 | P11387    | DNA topoisomerase 1 [OS=Homo sapiens]                                             | 128.343       | 9.93.E+08         | 9.46.E+08         | 9.81.E+08         | 9.79.E+08         | 7.41.E+08            | 7.70.E+08            | 7.62.E+08            | 8.01.E+08            | 8.63.E+08            | 8.82.E+08            | 8.62.E+08            | 8.82.E+08            |
| 454 | P14314    | Glucosidase 2 subunit beta [OS=Homo sapiens]                                      | 128.234       | 1.38.E+09         | 1.41.E+09         | 1.43.E+09         | 1.37.E+09         | 1.32.E+09            | 1.29.E+09            | 1.30.E+09            | 1.26.E+09            | 1.14.E+09            | 1.17.E+09            | 1.18.E+09            | 1.11.E+09            |
| 455 | Q15102    | Platelet-activating factor acetylhydrolase IB subunit gamma [OS=Homo sapiens]     | 128.081       | 6.10.E+08         | 6.71.E+08         | 6.65.E+08         | 6.58.E+08         | 5.63.E+08            | 5.95.E+08            | 5.96.E+08            | 5.85.E+08            | 7.49.E+08            | 7.50.E+08            | 7.70.E+08            | 7.64.E+08            |
| 456 | P18621    | 60S ribosomal protein L17 [OS=Homo sapiens]                                       | 127.441       | 2.52.E+09         | 2.62.E+09         | 2.68.E+09         | 2.50.E+09         | 2.55.E+09            | 2.54.E+09            | 2.46.E+09            | 2.52.E+09            | 2.40.E+09            | 2.53.E+09            | 2.53.E+09            | 2.43.E+09            |
| 457 | P27635    | 60S ribosomal protein L10 [OS=Homo sapiens]                                       | 127.397       | 1.88.E+09         | 1.79.E+09         | 1.67.E+09         | 1.81.E+09         | 1.89.E+09            | 1.82.E+09            | 1.76.E+09            | 1.80.E+09            | 1.83.E+09            | 1.67.E+09            | 1.68.E+09            | 1.74.E+09            |
| 458 | O76094    | Signal recognition particle subunit SRP72 [OS=Homo sapiens]                       | 127.28        | 2.50.E+08         | 2.07.E+08         | 1.88.E+08         | 1.98.E+08         | 2.52.E+08            | 2.42.E+08            | 2.42.E+08            | 2.30.E+08            | 2.37.E+08            | 2.46.E+08            | 2.54.E+08            | 2.54.E+08            |
| 459 | O75367-1  | Core histone macro-H2A.1 [OS=Homo sapiens]                                        | 127.06        | 5.46.E+08         | 6.38.E+08         | 6.49.E+08         | 5.56.E+08         | 6.05.E+08            | 5.44.E+08            | 5.35.E+08            | 5.39.E+08            | 6.54.E+08            | 5.89.E+08            | 5.87.E+08            | 7.11.E+08            |
| 460 | P08134    | Rho-related GTP-binding protein RhoC [OS=Homo sapiens]                            | 126.896       | 2.70.E+07         | 2.18.E+07         | 2.21.E+07         | 2.07.E+07         | 4.09.E+07            | 4.19.E+07            | 4.35.E+07            | 3.82.E+07            | 2.18.E+07            | 2.92.E+07            | 2.99.E+07            | 2.76.E+07            |

| No. | Accession | Description                                                                                          | Sum PEP Score | CTRL Abundances_1 | CTRL Abundances_2 | CTRL Abundances_3 | CTRL Abundances_4 | CLDN6-1 Abundances_1 | CLDN6-1 Abundances_2 | CLDN6-1 Abundances_3 | CLDN6-1 Abundances_4 | CLDN6-2 Abundances_1 | CLDN6-2 Abundances_2 | CLDN6-2 Abundances_3 | CLDN6-2 Abundances_4 |
|-----|-----------|------------------------------------------------------------------------------------------------------|---------------|-------------------|-------------------|-------------------|-------------------|----------------------|----------------------|----------------------|----------------------|----------------------|----------------------|----------------------|----------------------|
| 463 | P23588    | eukaryotic translation initiation factor 4B [OS=Homo sapiens]                                        | 125.543       | 8.30.E+08         | 6.64.E+08         | 8.65.E+08         | 6.98.E+08         | 8.07.E+08            | 8.62.E+08            | 8.35.E+08            | 8.37.E+08            | 7.84.E+08            | 8.31.E+08            | 8.85.E+08            | 6.87.E+08            |
| 464 | P20618    | proteasome subunit beta type-1 [OS=Homo sapiens]                                                     | 125.394       | 7.70.E+08         | 7.88.E+08         | 8.06.E+08         | 7.97.E+08         | 7.73.E+08            | 7.69.E+08            | 6.57.E+08            | 7.88.E+08            | 8.15.E+08            | 8.46.E+08            | 7.28.E+08            | 8.45.E+08            |
| 465 | Q9UN22    | NSFL1 cofactor p47 [OS=Homo sapiens]                                                                 | 125.323       | 2.02.E+08         | 2.20.E+08         | 2.59.E+08         | 2.30.E+08         | 2.11.E+08            | 2.30.E+08            | 2.11.E+08            | 2.24.E+08            | 2.59.E+08            | 2.80.E+08            | 2.85.E+08            | 2.73.E+08            |
| 466 | P07910-2  | Isoform C1 of Heterogeneous nuclear ribonucleoproteins C1/C2 [OS=Homo sapiens]                       | 125.273       | 5.83.E+09         | 6.06.E+09         | 6.12.E+09         | 6.39.E+09         | 5.35.E+09            | 5.45.E+09            | 5.57.E+09            | 5.69.E+09            | 6.56.E+09            | 6.44.E+09            | 6.65.E+09            | 6.65.E+09            |
| 467 | P62979    | Ubiquitin-40S ribosomal protein S27a [OS=Homo sapiens]                                               | 124.762       | 4.13.E+09         | 4.07.E+09         | 4.04.E+09         | 4.13.E+09         | 4.22.E+09            | 4.10.E+09            | 4.04.E+09            | 4.19.E+09            | 4.62.E+09            | 4.65.E+09            | 4.72.E+09            | 4.46.E+09            |
| 468 | P00441    | Superoxide dismutase [Cu-Zn] [OS=Homo sapiens]                                                       | 124.563       | 1.96.E+09         | 1.99.E+09         | 2.00.E+09         | 1.90.E+09         | 1.64.E+09            | 1.64.E+09            | 1.69.E+09            | 1.64.E+09            | 1.93.E+09            | 1.89.E+09            | 1.89.E+09            | 1.90.E+09            |
| 469 | P12235    | ADP/ATP translocase 1 [OS=Homo sapiens]                                                              | 124.483       | 1.30.E+07         | 1.49.E+07         | 1.70.E+07         | 4.80.E+07         | 1.77.E+07            | 2.94.E+07            | 1.94.E+07            | 2.71.E+07            | 2.80.E+07            | 1.90.E+07            | 2.47.E+07            | 1.64.E+07            |
| 470 | O00232-1  | 26S proteasome non-ATPase regulatory subunit 12 [OS=Homo sapiens]                                    | 124.097       | 6.01.E+08         | 5.11.E+08         | 5.71.E+08         | 5.88.E+08         | 4.93.E+08            | 6.08.E+08            | 5.69.E+08            | 5.56.E+08            | 6.29.E+08            | 5.87.E+08            | 6.54.E+08            | 5.58.E+08            |
| 471 | P07384    | Calpain-1 catalytic subunit [OS=Homo sapiens]                                                        | 123.85        | 7.18.E+08         | 7.89.E+08         | 7.33.E+08         | 7.61.E+08         | 1.26.E+09            | 1.20.E+09            | 1.17.E+09            | 1.20.E+09            | 7.78.E+08            | 7.67.E+08            | 7.72.E+08            | 7.88.E+08            |
| 472 | Q9Y446    | Plakophilin-3 [OS=Homo sapiens]                                                                      | 123.542       | 6.71.E+08         | 6.38.E+08         | 6.40.E+08         | 7.13.E+08         | 7.22.E+08            | 7.84.E+08            | 8.34.E+08            | 7.11.E+08            | 6.34.E+08            | 6.42.E+08            | 6.27.E+08            | 5.93.E+08            |
| 473 | Q9P258    | Protein RCC2 [OS=Homo sapiens]                                                                       | 123.111       | 6.34.E+08         | 6.58.E+08         | 6.38.E+08         | 6.37.E+08         | 4.97.E+08            | 5.44.E+08            | 5.59.E+08            | 5.66.E+08            | 6.43.E+08            | 6.12.E+08            | 5.59.E+08            | 5.70.E+08            |
| 474 | Q96DG6    | Carboxymethylenebutenolide homolog [OS=Homo sapiens]                                                 | 122.994       | 5.12.E+08         | 5.25.E+08         | 5.35.E+08         | 5.82.E+08         | 4.64.E+08            | 4.80.E+08            | 4.83.E+08            | 4.64.E+08            | 5.13.E+08            | 5.14.E+08            | 5.14.E+08            | 4.97.E+08            |
| 475 | Q9BT78    | COP9 signalosome complex subunit 4 [OS=Homo sapiens]                                                 | 122.656       | 3.86.E+08         | 4.08.E+08         | 3.74.E+08         | 3.77.E+08         | 3.59.E+08            | 3.63.E+08            | 3.74.E+08            | 3.72.E+08            | 4.48.E+08            | 3.91.E+08            | 4.57.E+08            | 3.85.E+08            |
| 476 | Q9H2J2    | Inorganic pyrophosphatase 2, mitochondrial [OS=Homo sapiens]                                         | 122.635       | 5.87.E+08         | 4.19.E+08         | 4.27.E+08         | 6.03.E+08         | 5.63.E+08            | 5.57.E+08            | 5.54.E+08            | 5.24.E+08            | 6.34.E+08            | 6.07.E+08            | 6.62.E+08            | 5.77.E+08            |
| 477 | Q13162    | Peroxisome import receptor subunit TOM40 homolog [OS=Homo sapiens]                                   | 122.548       | 6.29.E+08         | 6.41.E+08         | 6.63.E+08         | 6.77.E+08         | 5.74.E+08            | 5.04.E+08            | 5.62.E+08            | 5.90.E+08            | 6.04.E+08            | 6.16.E+08            | 6.20.E+08            | 6.12.E+08            |
| 478 | O96008    | Mitochondrial import receptor subunit TOM40 homolog [OS=Homo sapiens]                                | 122.516       | 5.20.E+08         | 4.86.E+08         | 5.28.E+08         | 5.17.E+08         | 6.06.E+08            | 6.91.E+08            | 6.56.E+08            | 6.49.E+08            | 4.30.E+08            | 4.80.E+08            | 4.47.E+08            | 4.39.E+08            |
| 479 | P13995    | Bifunctional methylenetetrahydrofolate dehydrogenase/cyclohydrolase, mitochondrial [OS=Homo sapiens] | 122.231       | 3.78.E+08         | 2.72.E+08         | 2.70.E+08         | 2.06.E+08         | 2.94.E+08            | 1.81.E+08            | 1.70.E+08            | 1.70.E+08            | 2.58.E+08            | 2.50.E+08            | 2.20.E+08            | 3.35.E+08            |
| 480 | P16989-2  | Isoform 2 of Y-box-binding protein 3 [OS=Homo sapiens]                                               | 122.096       | 1.42.E+07         | 1.82.E+07         | 1.64.E+07         | 1.20.E+07         | 1.55.E+07            | 1.50.E+07            | 1.21.E+07            | 1.20.E+07            | 1.06.E+07            | 1.02.E+07            |                      | 1.07.E+07            |
| 481 | O15231-3  | Isoform 3 of Zinc finger protein 185 [OS=Homo sapiens]                                               | 121.869       | 3.69.E+08         | 4.45.E+08         | 4.54.E+08         | 4.44.E+08         | 5.76.E+08            | 6.15.E+08            | 5.86.E+08            | 5.99.E+08            | 5.63.E+08            | 5.80.E+08            | 5.90.E+08            | 5.82.E+08            |
| 482 | P13667    | Protein disulfide-isomerase A4 [OS=Homo sapiens]                                                     | 121.788       | 8.72.E+08         | 9.08.E+08         | 9.08.E+08         | 8.26.E+08         | 1.01.E+09            | 9.94.E+08            | 9.49.E+08            | 9.47.E+08            | 1.01.E+09            | 9.60.E+08            | 1.00.E+09            | 9.68.E+08            |
| 483 | Q04826    | HLA class I histocompatibility antigen, B-40 alpha chain [OS=Homo sapiens]                           | 121.5         | 3.20.E+08         | 3.62.E+08         | 3.52.E+08         | 3.41.E+08         | 1.87.E+08            | 2.01.E+08            | 1.96.E+08            | 1.81.E+08            | 6.10.E+08            | 6.08.E+08            | 5.76.E+08            | 5.74.E+08            |
| 484 | P62333    | 26S proteasome regulatory subunit 10B [OS=Homo sapiens]                                              | 121.371       | 4.68.E+08         | 4.21.E+08         | 4.57.E+08         | 4.90.E+08         | 3.54.E+08            | 3.85.E+08            | 3.28.E+08            | 3.18.E+08            | 3.75.E+08            | 4.18.E+08            | 4.02.E+08            | 3.93.E+08            |
| 485 | O43242    | 26S proteasome non-ATPase regulatory subunit 3 [OS=Homo sapiens]                                     | 121.195       | 5.98.E+08         | 4.62.E+08         | 4.72.E+08         | 5.80.E+08         | 5.79.E+08            | 4.93.E+08            | 6.00.E+08            | 5.66.E+08            | 6.95.E+08            | 5.27.E+08            | 6.54.E+08            | 6.44.E+08            |
| 486 | P06899    | Histone H2B type 1-J [OS=Homo sapiens]                                                               | 120.214       | 3.46.E+09         | 3.70.E+09         | 3.89.E+09         | 3.56.E+09         | 3.14.E+09            | 3.14.E+09            | 3.12.E+09            | 3.36.E+09            | 3.45.E+09            | 3.78.E+09            | 3.77.E+09            | 3.57.E+09            |
| 487 | P28482    | mitogen-activated protein kinase 1 [OS=Homo sapiens]                                                 | 119.941       | 9.29.E+08         | 7.68.E+08         | 9.22.E+08         | 8.25.E+08         | 9.97.E+08            | 1.06.E+09            | 1.01.E+09            | 9.06.E+08            | 1.08.E+09            | 1.09.E+09            | 1.05.E+09            | 1.12.E+09            |
| 488 | P46776    | 60S ribosomal protein L27a [OS=Homo sapiens]                                                         | 119.919       | 2.08.E+09         | 2.84.E+09         | 2.76.E+09         | 2.63.E+09         | 2.59.E+09            | 2.15.E+09            | 2.21.E+09            | 2.22.E+09            | 2.68.E+09            | 2.58.E+09            | 2.17.E+09            | 2.55.E+09            |
| 489 | P61313-1  | 60S ribosomal protein L15 [OS=Homo sapiens]                                                          | 119.717       | 2.11.E+09         | 2.17.E+09         | 2.19.E+09         | 2.29.E+09         | 2.21.E+09            | 2.26.E+09            | 2.24.E+09            | 2.26.E+09            | 2.09.E+09            | 2.14.E+09            | 2.05.E+09            | 2.00.E+09            |
| 490 | Q562R1    | Beta-actin-like protein 2 [OS=Homo sapiens]                                                          | 119.613       | 2.83.E+08         | 2.98.E+08         | 2.19.E+08         | 5.66.E+07         | 1.70.E+08            | 1.89.E+08            | 1.72.E+08            | 1.35.E+08            | 2.01.E+08            | 1.05.E+08            | 1.85.E+08            | 1.19.E+08            |
| 491 | O60814    | Histone H2B type 1-K [OS=Homo sapiens]                                                               | 119.554       | 4.62.E+10         | 4.44.E+10         | 4.52.E+10         | 4.58.E+10         | 3.75.E+10            | 3.80.E+10            | 3.88.E+10            | 3.99.E+10            | 4.20.E+10            | 4.12.E+10            | 4.13.E+10            | 4.06.E+10            |
| 492 | P12191    | Cysteine and glycine-rich protein 1 [OS=Homo sapiens]                                                | 119.239       | 7.25.E+08         | 7.24.E+08         | 6.97.E+08         | 7.08.E+08         | 9.73.E+08            | 9.78.E+08            | 9.77.E+08            | 1.01.E+09            | 8.37.E+08            | 8.32.E+08            | 8.11.E+08            | 7.92.E+08            |
| 493 | Q92598    | Heat shock protein 105 kDa [OS=Homo sapiens]                                                         | 118.383       | 5.85.E+08         | 5.84.E+08         | 5.79.E+08         | 6.10.E+08         | 5.33.E+08            | 5.46.E+08            | 5.79.E+08            | 5.41.E+08            | 5.72.E+08            | 6.03.E+08            | 5.93.E+08            | 6.21.E+08            |
| 494 | Q99829    | Copine-1 [OS=Homo sapiens]                                                                           | 118.232       | 6.45.E+08         | 6.26.E+08         | 6.31.E+08         | 6.47.E+08         | 7.71.E+08            | 7.51.E+08            | 7.29.E+08            | 7.42.E+08            | 6.47.E+08            | 6.98.E+08            | 7.50.E+08            | 7.30.E+08            |
| 495 | P62195-1  | 26S proteasome regulatory subunit 8 [OS=Homo sapiens]                                                | 117.947       | 6.04.E+08         | 6.07.E+08         | 6.14.E+08         | 5.52.E+08         | 5.35.E+08            | 5.28.E+08            | 5.16.E+08            | 5.27.E+08            | 6.87.E+08            | 6.24.E+08            | 6.24.E+08            | 6.11.E+08            |
| 496 | O43143    | Pre-mRNA-splicing factor ATP-dependent RNA helicase DHX15 [OS=Homo sapiens]                          | 117.871       | 6.72.E+08         | 6.77.E+08         | 6.31.E+08         | 9.09.E+08         | 6.00.E+08            | 6.16.E+08            | 6.32.E+08            | 5.88.E+08            | 6.91.E+08            | 6.18.E+08            | 6.07.E+08            | 6.26.E+08            |
| 497 | P12004    | proliferating cell nuclear antigen [OS=Homo sapiens]                                                 | 117.512       | 1.32.E+09         | 1.30.E+09         | 1.28.E+09         | 1.37.E+09         | 1.41.E+09            | 1.38.E+09            | 1.41.E+09            | 1.39.E+09            | 1.26.E+09            | 1.21.E+09            | 1.20.E+09            | 1.18.E+09            |
| 498 | Q6DKJ4    | nucleoredoxin [OS=Homo sapiens]                                                                      | 117.345       | 3.32.E+08         | 2.79.E+08         | 2.84.E+08         | 2.93.E+08         | 2.51.E+08            | 2.58.E+08            | 2.41.E+08            | 2.42.E+08            | 1.51.E+08            | 1.44.E+08            | 1.54.E+08            | 1.61.E+08            |
| 499 | O75531    | Barrier-to-autointegration factor [OS=Homo sapiens]                                                  | 116.957       | 1.56.E+09         | 1.52.E+09         | 1.44.E+09         | 1.45.E+09         | 1.44.E+09            | 1.49.E+09            | 1.42.E+09            | 1.41.E+09            | 1.62.E+09            | 1.59.E+09            | 1.61.E+09            | 1.84.E+09            |
| 500 | Q01105    | Protein SET [OS=Homo sapiens]                                                                        | 116.919       | 2.26.E+09         | 2.11.E+09         | 2.20.E+09         | 2.05.E+09         | 2.24.E+09            | 2.23.E+09            | 2.25.E+09            | 2.15.E+09            | 2.06.E+09            | 2.23.E+09            | 2.23.E+09            | 2.22.E+09            |
| 501 | P60903    | Protein S100-A10 [OS=Homo sapiens]                                                                   | 116.837       | 8.34.E+09         | 8.33.E+09         | 8.31.E+09         | 8.10.E+09         | 9.05.E+09            | 9.22.E+09            | 9.26.E+09            | 9.02.E+09            | 9.08.E+09            | 8.80.E+09            | 8.76.E+09            | 8.95.E+09            |
| 502 | Q14247-1  | Src substrate cortactin [OS=Homo sapiens]                                                            | 116.474       | 2.64.E+08         | 3.20.E+08         | 3.50.E+08         | 3.89.E+08         | 1.78.E+08            | 2.89.E+08            | 4.00.E+08            | 3.07.E+08            | 4.95.E+08            | 5.34.E+08            | 5.12.E+08            | 5.14.E+08            |
| 503 | P30050-1  | 60S ribosomal protein L12 [OS=Homo sapiens]                                                          | 116.368       | 3.46.E+09         | 3.61.E+09         | 3.55.E+09         | 3.40.E+09         | 3.26.E+09            | 3.24.E+09            | 3.26.E+09            | 3.28.E+09            | 3.27.E+09            | 3.23.E+09            | 3.27.E+09            | 3.25.E+09            |
| 504 | P31930    | Cytochrome b-c1 complex subunit 1, mitochondrial [OS=Homo sapiens]                                   | 116.282       | 6.60.E+08         | 6.64.E+08         | 6.40.E+08         | 6.75.E+08         | 6.17.E+08            | 5.83.E+08            | 5.22.E+08            | 5.75.E+08            | 6.51.E+08            | 6.67.E+08            | 6.41.E+08            | 6.19.E+08            |
| 505 | P18465    | HLA class I histocompatibility antigen, B-57 alpha chain [OS=Homo sapiens]                           | 115.853       |                   |                   |                   |                   |                      |                      |                      |                      |                      |                      |                      |                      |
| 506 | P43487    | Ran-specific GTPase-activating protein [OS=Homo sapiens]                                             | 115.669       | 1.94.E+09         | 2.03.E+09         | 1.99.E+09         | 1.90.E+09         | 1.90.E+09            | 1.93.E+09            | 1.92.E+09            | 1.92.E+09            | 2.13.E+09            | 2.03.E+09            | 2.05.E+09            | 2.06.E+09            |
| 507 | Q9NZL4    | Hsp70-binding protein 1 OS=Homo sapiens OX=9606 GN=HSPBP1 PE=1 SV=2                                  | 115.31        | 4.51.E+08         | 3.83.E+08         | 3.85.E+08         | 3.85.E+08         | 4.86.E+08            | 4.78.E+08            | 4.44.E+08            | 3.97.E+08            | 3.40.E+08            | 2.95.E+08            | 3.07.E+08            | 3.55.E+08            |
| 508 | P0C055    | Histone H2A.Z [OS=Homo sapiens]                                                                      | 115.303       | 2.46.E+09         | 2.61.E+09         | 2.75.E+09         | 2.54.E+09         | 2.03.E+09            | 2.15.E+09            | 2.16.E+09            | 2.24.E+09            | 2.42.E+09            | 2.63.E+09            | 2.64.E+09            | 2.58.E+09            |
| 509 | P38159-1  | RNA-binding motif protein, X chromosome [OS=Homo sapiens]                                            | 115.008       | 1.15.E+09         | 1.18.E+09         | 1.17.E+09         | 1.19.E+09         | 1.07.E+09            | 1.11.E+09            | 1.14.E+09            | 1.15.E+09            | 1.19.E+09            | 1.15.E+09            | 1.17.E+09            | 1.16.E+09            |
| 510 | P11766    | alcohol dehydrogenase class-3 [OS=Homo sapiens]                                                      | 114.896       | 4.53.E+08         | 4.97.E+08         | 5.16.E+08         | 5.24.E+08         | 5.10.E+08            | 4.85.E+08            | 4.88.E+08            | 4.86.E+08            | 5.92.E+08            | 6.64.E+08            | 6.56.E+08            | 6.22.E+08            |
| 511 | P62879    | Guanine nucleotide-binding protein G(I)/G(S)/G(T) subunit beta-2 [OS=Homo sapiens]                   | 114.697       | 3.19.E+08         | 3.25.E+08         | 3.28.E+08         | 3.28.E+08         | 3.41.E+08            | 3.40.E+08            | 3.46.E+08            | 3.71.E+08            | 2.30.E+08            | 2.67.E+08            | 2.65.E+08            | 2.67.E+08            |
| 512 | P18085    | ADP-ribosylation factor 4 [OS=Homo sapiens]                                                          | 114.686       | 3.01.E+08         | 3.00.E+08         | 3.29.E+08         | 3.25.E+08         | 4.43.E+08            | 4.59.E+08            | 4.46.E+08            | 4.78.E+08            | 3.76.E+08            | 4.33.E+08            | 4.44.E+08            | 4.43.E+08            |
| 513 | P05534    | HLA class I histocompatibility antigen, A-24 alpha chain [OS=Homo sapiens]                           | 114.461       |                   |                   |                   |                   |                      |                      |                      |                      |                      |                      |                      |                      |
| 514 | Q9NSD9    | Phenylalanine-tRNA ligase beta subunit [OS=Homo sapiens]                                             | 114.424       | 1.05.E+09         | 1.07.E+09         | 1.03.E+09         | 1.06.E+09         | 9.19.E+08            | 8.95.E+08            | 9.38.E+08            | 9.44.E+08            | 1.11.E+09            | 1.09.E+09            | 1.07.E+09            | 1.14.E+09            |
| 515 | Q9UHB9    | Signal recognition particle subunit SRP68 [OS=Homo sapiens]                                          | 113.531       | 3.37.E+08         | 3.05.E+08         | 3.28.E+08         | 3.63.E+08         | 3.18.E+08            | 3.35.E+08            | 3.49.E+08            | 3.22.E+08            | 3.24.E+08            | 3.37.E+08            | 3.18.E+08            | 3.14.E+08            |
| 516 | P17812    | CTP synthase 1 [OS=Homo sapiens]                                                                     | 112.678       | 1.05.E+09         | 1.09.E+09         | 1.12.E+09         | 1.08.E+09         | 1.04.E+09            | 1.00.E+09            | 1.01.E+09            | 1.02.E+09            | 1.03.E+09            | 1.05.E+09            | 1.04.E+09            | 1.03.E+09            |

| No. | Accession | Description                                                                     | Sum PEP Score | CTRL Abundances_1 | CTRL Abundances_2 | CTRL Abundances_3 | CTRL Abundances_4 | CLDN6-1 Abundances_1 | CLDN6-1 Abundances_2 | CLDN6-1 Abundances_3 | CLDN6-1 Abundances_4 | CLDN6-2 Abundances_1 | CLDN6-2 Abundances_2 | CLDN6-2 Abundances_3 | CLDN6-2 Abundances_4 |
|-----|-----------|---------------------------------------------------------------------------------|---------------|-------------------|-------------------|-------------------|-------------------|----------------------|----------------------|----------------------|----------------------|----------------------|----------------------|----------------------|----------------------|
| 517 | Q15691    | Microtubule-associated protein RP/EB family member 1 [OS=Homo sapiens]          | 112.298       | 6.40.E+08         | 6.16.E+08         | 6.17.E+08         | 6.56.E+08         | 6.76.E+08            | 6.75.E+08            | 6.83.E+08            | 7.01.E+08            | 7.03.E+08            | 7.37.E+08            | 7.53.E+08            | 6.45.E+08            |
| 518 | Q9H3U1    | Protein unc-45 homolog A [OS=Homo sapiens]                                      | 112.25        | 2.62.E+08         | 2.59.E+08         | 2.94.E+08         | 2.92.E+08         | 2.54.E+08            | 2.87.E+08            | 2.65.E+08            | 2.87.E+08            | 3.61.E+08            | 3.55.E+08            | 3.50.E+08            | 3.36.E+08            |
| 519 | Q71D13    | histone H3.2 [OS=Homo sapiens]                                                  | 112.181       | 9.96.E+08         | 1.26.E+09         | 6.73.E+08         | 4.82.E+08         | 1.10.E+09            | 8.42.E+08            | 6.97.E+08            | 8.12.E+08            | 1.41.E+09            | 6.51.E+08            | 6.06.E+08            | 5.34.E+08            |
| 520 | Q9NTK5-1  | obg-like ATPase 1 [OS=Homo sapiens]                                             | 112.041       | 9.54.E+08         | 8.94.E+08         | 8.43.E+08         | 8.85.E+08         | 1.04.E+09            | 1.03.E+09            | 1.07.E+09            | 1.09.E+09            | 9.30.E+08            | 9.64.E+08            | 9.67.E+08            | 9.70.E+08            |
| 521 | Q13283    | Ras GTPase-activating protein-binding protein 1 [OS=Homo sapiens]               | 111.413       | 7.04.E+08         | 6.98.E+08         | 7.34.E+08         | 7.53.E+08         | 6.49.E+08            | 6.31.E+08            | 6.32.E+08            | 6.68.E+08            | 6.96.E+08            | 7.28.E+08            | 7.07.E+08            | 7.77.E+08            |
| 522 | P55263-1  | Adenosine kinase [OS=Homo sapiens]                                              | 111.387       | 5.14.E+08         | 4.10.E+08         | 4.92.E+08         | 4.67.E+08         | 5.71.E+08            | 5.79.E+08            | 4.17.E+08            | 5.02.E+08            | 5.74.E+08            | 7.04.E+08            | 7.18.E+08            | 8.07.E+08            |
| 523 | Q99798    | Aconitate hydratase, mitochondrial [OS=Homo sapiens]                            | 111.234       | 3.05.E+08         | 2.90.E+08         | 3.08.E+08         | 2.72.E+08         | 2.60.E+08            | 2.55.E+08            | 2.48.E+08            | 2.55.E+08            | 3.26.E+08            | 3.22.E+08            | 3.30.E+08            | 3.23.E+08            |
| 524 | P63010-1  | AP-2 complex subunit beta [OS=Homo sapiens]                                     | 111.187       | 4.41.E+08         | 4.36.E+08         | 4.70.E+08         | 3.87.E+08         | 5.01.E+08            | 4.94.E+08            | 4.94.E+08            | 5.20.E+08            | 4.56.E+08            | 4.75.E+08            | 5.23.E+08            | 4.79.E+08            |
| 525 | P68431    | Histone H3.1 [OS=Homo sapiens]                                                  | 110.925       | 2.43.E+10         | 2.60.E+10         | 2.74.E+10         | 2.82.E+10         | 2.38.E+10            | 2.46.E+10            | 2.41.E+10            | 2.48.E+10            | 2.17.E+10            | 2.50.E+10            | 2.44.E+10            | 2.42.E+10            |
| 526 | P60228    | Eukaryotic translation initiation factor 3 subunit E [OS=Homo sapiens]          | 110.59        | 4.84.E+08         | 5.01.E+08         | 5.14.E+08         | 5.33.E+08         | 5.32.E+08            | 5.07.E+08            | 5.32.E+08            | 5.28.E+08            | 4.40.E+08            | 4.42.E+08            | 6.47.E+08            | 6.43.E+08            |
| 527 | P28838    | cytosol aminopeptidase [OS=Homo sapiens]                                        | 110.516       | 2.84.E+08         | 2.94.E+08         | 2.51.E+08         | 2.96.E+08         | 2.56.E+08            | 2.74.E+08            | 2.60.E+08            | 2.46.E+08            | 3.44.E+08            | 3.07.E+08            | 3.11.E+08            | 3.30.E+08            |
| 528 | P04080    | Cystatin-B [OS=Homo sapiens]                                                    | 110.113       | 2.27.E+09         | 2.40.E+09         | 2.23.E+09         | 2.04.E+09         | 3.13.E+09            | 2.91.E+09            | 2.99.E+09            | 3.21.E+09            | 3.56.E+09            | 3.45.E+09            | 3.54.E+09            | 3.37.E+09            |
| 529 | P06493    | Cyclin-dependent kinase 1 [OS=Homo sapiens]                                     | 109.858       | 1.04.E+09         | 1.05.E+09         | 1.03.E+09         | 9.66.E+08         | 9.26.E+08            | 9.10.E+08            | 9.01.E+08            | 9.20.E+08            | 9.68.E+08            | 9.45.E+08            | 9.56.E+08            | 9.21.E+08            |
| 530 | P00491    | purine nucleoside phosphorylase [OS=Homo sapiens]                               | 109.751       | 4.68.E+08         | 4.25.E+08         | 4.19.E+08         | 4.26.E+08         | 5.15.E+08            | 5.02.E+08            | 4.98.E+08            | 4.01.E+08            | 5.70.E+08            | 5.61.E+08            | 5.65.E+08            | 5.97.E+08            |
| 531 | P98179    | RNA-binding protein 3 [OS=Homo sapiens]                                         | 109.596       | 6.22.E+08         | 6.08.E+08         | 6.32.E+08         | 6.22.E+08         | 4.77.E+08            | 5.09.E+08            | 4.83.E+08            | 4.57.E+08            | 7.18.E+08            | 6.75.E+08            | 7.58.E+08            | 7.63.E+08            |
| 532 | P25787    | Proteasome subunit alpha type-2 [OS=Homo sapiens]                               | 108.922       | 7.64.E+08         | 7.31.E+08         | 7.44.E+08         | 6.84.E+08         | 5.70.E+08            | 6.23.E+08            | 5.65.E+08            | 6.30.E+08            | 6.93.E+08            | 6.93.E+08            | 7.04.E+08            | 6.89.E+08            |
| 533 | Q15046    | Lysine--tRNA ligase [OS=Homo sapiens]                                           | 108.903       | 7.88.E+08         | 7.43.E+08         | 7.67.E+08         | 7.33.E+08         | 6.38.E+08            | 6.19.E+08            | 6.27.E+08            | 6.27.E+08            | 1.08.E+09            | 1.02.E+09            | 1.04.E+09            | 1.03.E+09            |
| 534 | P35520-1  | Cystathionine beta-synthase [OS=Homo sapiens]                                   | 108.46        | 5.58.E+08         | 5.90.E+08         | 5.14.E+08         | 5.72.E+08         | 4.10.E+08            | 4.21.E+08            | 4.26.E+08            | 4.07.E+08            | 4.63.E+08            | 4.78.E+08            | 4.47.E+08            | 4.76.E+08            |
| 535 | P53582    | Methionine aminopeptidase 1 [OS=Homo sapiens]                                   | 108.374       | 3.70.E+08         | 3.43.E+08         | 3.66.E+08         | 3.39.E+08         | 3.23.E+08            | 3.48.E+08            | 3.69.E+08            | 3.63.E+08            | 3.85.E+08            | 3.94.E+08            | 4.26.E+08            | 4.30.E+08            |
| 536 | Q70621    | Ribosomal L1 domain-containing protein 1 [OS=Homo sapiens]                      | 108.317       | 6.19.E+08         | 5.71.E+08         | 5.79.E+08         | 6.12.E+08         | 5.36.E+08            | 5.52.E+08            | 5.69.E+08            | 5.42.E+08            | 5.27.E+08            | 5.46.E+08            | 5.18.E+08            | 4.93.E+08            |
| 537 | Q96KP4    | cytosolic non-specific dipeptidase [OS=Homo sapiens]                            | 107.965       | 5.01.E+08         | 5.21.E+08         | 5.20.E+08         | 5.80.E+08         | 6.44.E+08            | 6.40.E+08            | 6.45.E+08            | 5.96.E+08            | 6.65.E+08            | 6.34.E+08            | 6.69.E+08            | 6.36.E+08            |
| 538 | P30740    | Leukocyte elastase inhibitor [OS=Homo sapiens]                                  | 107.876       | 5.06.E+08         | 5.80.E+08         | 5.15.E+08         | 5.53.E+08         | 8.90.E+08            | 8.97.E+08            | 8.92.E+08            | 9.25.E+08            | 6.05.E+08            | 6.49.E+08            | 6.78.E+08            | 5.95.E+08            |
| 539 | Q31612    | HLA class I histocompatibility antigen, B-73 alpha chain [OS=Homo sapiens]      | 107.746       |                   |                   |                   |                   |                      |                      |                      |                      |                      |                      |                      |                      |
| 540 | Q92688    | Acidic leucine-rich nuclear phosphoprotein 32 family member B [OS=Homo sapiens] | 107.468       | 3.65.E+08         | 2.95.E+08         | 2.97.E+08         | 3.29.E+08         | 3.27.E+08            | 3.14.E+08            | 3.17.E+08            | 2.89.E+08            | 3.20.E+08            | 3.05.E+08            | 2.89.E+08            | 2.98.E+08            |
| 541 | P54727    | UV excision repair protein RAD23 homolog B [OS=Homo sapiens]                    | 107.414       | 2.83.E+08         | 2.79.E+08         | 2.84.E+08         | 3.08.E+08         | 2.67.E+08            | 3.10.E+08            | 3.07.E+08            | 2.98.E+08            | 3.39.E+08            | 3.55.E+08            | 3.39.E+08            | 3.31.E+08            |
| 542 | Q15185    | Prostaglandin E synthase 3 [OS=Homo sapiens]                                    | 107.264       | 3.28.E+09         | 3.22.E+09         | 3.07.E+09         | 2.94.E+09         | 3.04.E+09            | 3.01.E+09            | 3.00.E+09            | 3.06.E+09            | 3.30.E+09            | 3.17.E+09            | 3.10.E+09            | 3.04.E+09            |
| 543 | P04908    | histone H2A type 1-B/E [OS=Homo sapiens]                                        | 107.262       | 1.81.E+09         | 1.82.E+09         | 1.72.E+09         | 1.57.E+09         | 1.21.E+09            | 1.14.E+09            | 1.18.E+09            | 1.22.E+09            | 1.44.E+09            | 1.27.E+09            | 1.25.E+09            | 1.26.E+09            |
| 544 | Q96TA1    | Niban-like protein 1 [OS=Homo sapiens]                                          | 107.154       | 3.09.E+08         | 2.77.E+08         | 2.94.E+08         | 2.80.E+08         | 3.07.E+08            | 2.94.E+08            | 2.99.E+08            | 2.16.E+08            | 3.12.E+08            | 3.15.E+08            | 3.11.E+08            | 3.22.E+08            |
| 545 | Q75822    | Eukaryotic translation initiation factor 3 subunit J [OS=Homo sapiens]          | 106.783       | 5.51.E+08         | 6.64.E+08         | 6.76.E+08         | 6.23.E+08         | 5.98.E+08            | 6.15.E+08            | 5.82.E+08            | 5.61.E+08            | 6.30.E+08            | 6.94.E+08            | 6.88.E+08            | 6.78.E+08            |
| 546 | P62820    | Ras-related protein Rab-1A [OS=Homo sapiens]                                    | 106.585       | 3.32.E+09         | 3.42.E+09         | 3.39.E+09         | 3.29.E+09         | 3.40.E+09            | 3.47.E+09            | 3.44.E+09            | 3.44.E+09            | 3.51.E+09            | 3.42.E+09            | 3.34.E+09            | 3.35.E+09            |
| 547 | P62841    | 40S ribosomal protein S15 [OS=Homo sapiens]                                     | 105.85        | 5.78.E+08         | 4.51.E+08         | 4.47.E+08         | 5.16.E+08         | 5.02.E+08            | 4.49.E+08            | 4.37.E+08            | 4.38.E+08            | 4.48.E+08            | 4.00.E+08            | 3.68.E+08            | 3.60.E+08            |
| 548 | P49321    | Nuclear autoantigenic sperm protein [OS=Homo sapiens]                           | 105.782       | 7.17.E+08         | 6.83.E+08         | 6.86.E+08         | 7.18.E+08         | 5.87.E+08            | 6.04.E+08            | 6.48.E+08            | 6.08.E+08            | 6.66.E+08            | 6.72.E+08            | 6.78.E+08            | 7.16.E+08            |
| 549 | Q9H9B4    | Sideroflexin-1 [OS=Homo sapiens]                                                | 105.661       | 5.04.E+08         | 4.80.E+08         | 4.89.E+08         | 4.84.E+08         | 4.93.E+08            | 4.83.E+08            | 4.22.E+08            | 4.89.E+08            | 5.78.E+08            | 5.51.E+08            | 5.49.E+08            | 5.38.E+08            |
| 550 | P84085    | ADP-ribosylation factor 5 [OS=Homo sapiens]                                     | 105.27        | 8.29.E+07         | 7.96.E+07         | 7.66.E+07         | 8.88.E+07         | 1.31.E+08            | 1.49.E+08            | 1.01.E+08            | 1.22.E+08            | 9.99.E+07            | 1.03.E+08            | 9.60.E+07            | 9.96.E+07            |
| 551 | Q16531    | DNA damage-binding protein 1 [OS=Homo sapiens]                                  | 105.252       | 7.86.E+08         | 6.99.E+08         | 7.09.E+08         | 6.19.E+08         | 6.99.E+08            | 6.32.E+08            | 5.73.E+08            | 4.91.E+08            | 8.91.E+08            | 7.66.E+08            | 6.48.E+08            | 7.08.E+08            |
| 552 | Q16836-1  | Hydroxyacyl-coenzyme A dehydrogenase, mitochondrial [OS=Homo sapiens]           | 105.044       | 5.39.E+08         | 3.33.E+08         | 4.44.E+08         | 3.74.E+08         | 3.51.E+08            | 3.67.E+08            | 3.33.E+08            | 3.26.E+08            | 3.14.E+08            | 3.14.E+08            | 3.28.E+08            | 2.83.E+08            |
| 553 | Q14979-1  | Heterogeneous nuclear ribonucleoprotein D-like [OS=Homo sapiens]                | 104.914       | 7.64.E+08         | 7.58.E+08         | 7.14.E+08         | 7.35.E+08         | 5.91.E+08            | 5.56.E+08            | 5.91.E+08            | 6.05.E+08            | 8.04.E+08            | 7.66.E+08            | 7.82.E+08            | 7.26.E+08            |
| 554 | Q7Z4W1    | L-xylulose reductase [OS=Homo sapiens]                                          | 104.578       | 4.56.E+08         | 4.48.E+08         | 4.32.E+08         | 4.26.E+08         | 4.68.E+08            | 4.75.E+08            | 4.62.E+08            | 4.67.E+08            | 2.18.E+08            | 2.00.E+08            | 2.27.E+08            | 2.14.E+08            |
| 555 | P30046    | D-dopachrome decarboxylase [OS=Homo sapiens]                                    | 104.534       | 1.66.E+09         | 1.69.E+09         | 1.66.E+09         | 1.65.E+09         | 1.55.E+09            | 1.55.E+09            | 1.58.E+09            | 1.43.E+09            | 1.59.E+09            | 1.59.E+09            | 1.59.E+09            | 1.63.E+09            |
| 556 | P16422    | Epithelial cell adhesion molecule [OS=Homo sapiens]                             | 104.361       | 8.21.E+08         | 8.01.E+08         | 7.90.E+08         | 8.38.E+08         | 5.90.E+08            | 5.94.E+08            | 5.87.E+08            | 5.97.E+08            | 6.47.E+08            | 6.10.E+08            | 5.65.E+08            | 6.00.E+08            |
| 557 | P36952-1  | Serpin B5 [OS=Homo sapiens]                                                     | 103.922       | 4.53.E+08         | 4.10.E+08         | 3.39.E+08         | 3.88.E+08         | 9.06.E+08            | 8.23.E+08            | 8.65.E+08            | 8.79.E+08            | 4.41.E+08            | 4.63.E+08            | 4.83.E+08            | 3.72.E+08            |
| 558 | Q09028    | Histone-binding protein RBBP4 [OS=Homo sapiens]                                 | 103.903       | 2.87.E+08         | 2.73.E+08         | 3.36.E+08         | 2.97.E+08         | 2.65.E+08            | 2.79.E+08            | 2.76.E+08            | 2.48.E+08            | 3.62.E+08            | 3.67.E+08            | 3.25.E+08            | 3.22.E+08            |
| 559 | P12270    | Nucleoprotein TPR [OS=Homo sapiens]                                             | 103.757       | 2.36.E+08         | 2.31.E+08         | 2.15.E+08         | 2.54.E+08         | 1.62.E+08            | 1.69.E+08            | 1.98.E+08            | 1.88.E+08            | 2.60.E+08            | 2.59.E+08            | 2.51.E+08            | 2.71.E+08            |
| 560 | P11388-1  | DNA topoisomerase 2-alpha [OS=Homo sapiens]                                     | 103.541       | 3.30.E+08         | 2.59.E+08         | 3.19.E+08         | 3.23.E+08         | 2.37.E+08            | 2.45.E+08            | 2.47.E+08            | 2.23.E+08            | 3.15.E+08            | 3.38.E+08            | 3.33.E+08            | 3.53.E+08            |
| 561 | P56537-1  | eukaryotic translation initiation factor 6 [OS=Homo sapiens]                    | 103.526       | 8.48.E+08         | 7.23.E+08         | 7.10.E+08         | 7.23.E+08         | 7.07.E+08            | 7.02.E+08            | 7.21.E+08            | 6.79.E+08            | 7.78.E+08            | 7.69.E+08            | 7.71.E+08            | 7.51.E+08            |
| 562 | P49589-1  | Cysteine--tRNA ligase, cytoplasmic [OS=Homo sapiens]                            | 103.279       | 5.06.E+08         | 5.19.E+08         | 5.35.E+08         | 5.07.E+08         | 5.26.E+08            | 5.20.E+08            | 5.00.E+08            | 5.25.E+08            | 4.70.E+08            | 4.92.E+08            | 4.59.E+08            | 4.70.E+08            |
| 563 | O00629    | Importin subunit alpha-3 [OS=Homo sapiens]                                      | 103.188       | 2.21.E+08         | 1.44.E+08         | 1.83.E+08         | 1.86.E+08         | 2.47.E+08            | 1.86.E+08            | 2.17.E+08            | 1.83.E+08            | 1.98.E+08            | 2.05.E+08            | 2.12.E+08            | 2.28.E+08            |
| 564 | P30048    | Thioredoxin-dependent peroxide reductase, mitochondrial [OS=Homo sapiens]       | 103.092       | 1.19.E+09         | 1.20.E+09         | 1.28.E+09         | 1.25.E+09         | 1.11.E+09            | 1.10.E+09            | 1.15.E+09            | 1.13.E+09            | 1.45.E+09            | 1.53.E+09            | 1.53.E+09            | 1.55.E+09            |
| 565 | Q9Y281-1  | Cofilin-2 [OS=Homo sapiens]                                                     | 103.067       | 2.98.E+07         | 2.66.E+07         | 3.04.E+07         | 2.81.E+07         | 3.45.E+07            | 3.90.E+07            | 3.75.E+07            | 3.46.E+07            | 4.39.E+07            | 5.22.E+07            | 4.63.E+07            | 5.11.E+07            |
| 566 | P62158    | Calmodulin [OS=Homo sapiens]                                                    | 102.854       | 1.72.E+09         | 1.69.E+09         | 1.64.E+09         | 1.69.E+09         | 1.77.E+09            | 1.75.E+09            | 1.75.E+09            | 1.63.E+09            | 1.54.E+09            | 1.49.E+09            | 1.47.E+09            | 1.54.E+09            |
| 567 | Q96FW1    | Ubiquitin thioesterase otub1 [OS=Homo sapiens]                                  | 102.804       | 6.28.E+08         | 6.22.E+08         | 6.72.E+08         | 6.45.E+08         | 6.25.E+08            | 6.17.E+08            | 6.37.E+08            | 5.18.E+08            | 7.03.E+08            | 7.39.E+08            | 7.41.E+08            | 7.51.E+08            |
| 568 | P80723    | Brain acid soluble protein 1 [OS=Homo sapiens]                                  | 102.743       | 3.95.E+08         | 4.34.E+08         | 4.43.E+08         | 4.50.E+08         | 6.41.E+08            | 6.75.E+08            | 6.74.E+08            | 6.79.E+08            | 5.93.E+08            | 5.76.E+08            | 5.63.E+08            | 5.63.E+08            |
| 569 | Q14126    | Desmoglein-2 [OS=Homo sapiens]                                                  | 102.532       | 8.70.E+08         | 5.73.E+08         | 7.98.E+08         | 7.89.E+08         | 9.38.E+08            | 9.50.E+08            | 7.04.E+08            | 9.81.E+08            | 5.29.E+08            | 9.16.E+08            | 7.54.E+08            | 7.56.E+08            |
| 570 | P0CG39    | POTE ankyrin domain family member J [OS=Homo sapiens]                           | 102.515       | 3.10.E+08         | 3.41.E+08         | 3.54.E+08         | 3.83.E+08         | 3.94.E+08            | 4.14.E+08            | 3.86.E+08            | 4.04.E+08            | 4.02.E+08            | 3.63.E+08            | 4.04.E+08            | 4.04.E+08            |
| 571 | P62244    | 40S ribosomal protein S15a [OS=Homo sapiens]                                    | 102.49        | 3.28.E+09         | 3.33.E+09         | 3.19.E+09         | 3.12.E+09         | 3.10.E+09            | 3.14.E+09            | 2.96.E+09            | 3.11.E+09            | 2.95.E+09            | 2.80.E+09            | 2.76.E+09            | 2.74.E+09            |
| 572 | Q9UQ35    | serine/arginine repetitive matrix protein 2 [OS=Homo sapiens]                   | 101.88        | 5.12.E+08         | 4.73.E+08         | 4.85.E+08         | 4.31.E+08         | 5.60.E+08            | 4.54.E+08            | 4.89.E+08            | 4.54.E+08            | 5.31.E+08            | 5.33.E+08            | 5.08.E+08            | 4.58.E+08            |
| 573 | P05141    | ADP/ATP translocase 2 [OS=Homo sapiens]                                         | 101.584       | 5.73.E+08         | 5.96.E+08         | 6.22.E+08         | 6.12.E+08         | 6.05.E+08            | 6.32.E+08            | 6.32.E+08            | 6.38.E+08            | 5.77.E+08            | 6.11.E+08            | 6.02.E+08            | 5.99.E+08            |
| 574 | Q14444-1  | Caprin-1 [OS=Homo sapiens]                                                      | 101.576       | 5.57.E+08         | 5.54.E+08         | 5.58.E+08         | 5.96.E+08         | 5.53.E+08            | 5.79.E+08            | 5.24.E+08            | 5.42.E+08            |                      |                      |                      |                      |

| No. | Accession | Description                                                                             | Sum PEP Score | CTRL Abundances_1 | CTRL Abundances_2 | CTRL Abundances_3 | CTRL Abundances_4 | CLDN6-1 Abundances_1 | CLDN6-1 Abundances_2 | CLDN6-1 Abundances_3 | CLDN6-1 Abundances_4 | CLDN6-2 Abundances_1 | CLDN6-2 Abundances_2 | CLDN6-2 Abundances_3 | CLDN6-2 Abundances_4 |
|-----|-----------|-----------------------------------------------------------------------------------------|---------------|-------------------|-------------------|-------------------|-------------------|----------------------|----------------------|----------------------|----------------------|----------------------|----------------------|----------------------|----------------------|
| 575 | P05556-1  | Integrin beta-1 [OS=Homo sapiens]                                                       | 101.447       | 5.08.E+08         | 5.19.E+08         | 5.39.E+08         | 5.31.E+08         | 5.49.E+08            | 5.68.E+08            | 5.64.E+08            | 5.79.E+08            | 5.21.E+08            | 5.28.E+08            | 5.11.E+08            | 5.12.E+08            |
| 576 | Q07960    | rho GTPase-activating protein 1 [OS=Homo sapiens]                                       | 101.016       | 3.94.E+08         | 3.44.E+08         | 3.53.E+08         | 3.81.E+08         | 4.09.E+08            | 4.11.E+08            | 4.07.E+08            | 3.96.E+08            | 3.60.E+08            | 4.17.E+08            | 4.29.E+08            | 4.08.E+08            |
| 577 | P09622    | dihydropyridyl dehydrogenase, mitochondrial [OS=Homo sapiens]                           | 100.863       | 2.96.E+08         | 2.94.E+08         | 2.58.E+08         | 2.77.E+08         | 3.23.E+08            | 3.36.E+08            | 3.34.E+08            | 2.89.E+08            | 2.48.E+08            | 1.93.E+08            | 2.42.E+08            | 2.46.E+08            |
| 578 | P24752    | Acetyl-CoA acetyltransferase, mitochondrial [OS=Homo sapiens]                           | 100.555       | 3.36.E+08         | 3.24.E+08         | 3.33.E+08         | 3.45.E+08         | 3.20.E+08            | 3.31.E+08            | 3.43.E+08            | 3.27.E+08            | 3.73.E+08            | 3.95.E+08            | 3.89.E+08            | 3.82.E+08            |
| 579 | P35998    | 26S proteasome regulatory subunit 7 [OS=Homo sapiens]                                   | 100.502       | 4.70.E+08         | 4.68.E+08         | 4.82.E+08         | 5.00.E+08         | 4.74.E+08            | 4.95.E+08            | 4.76.E+08            | 4.81.E+08            | 5.36.E+08            | 5.08.E+08            | 5.11.E+08            | 5.03.E+08            |
| 580 | Q12904-1  | aminoacyl tRNA synthase complex-interacting multifunctional protein 1 [OS=Homo sapiens] | 100.408       | 5.12.E+08         | 5.74.E+08         | 5.04.E+08         | 5.61.E+08         | 4.95.E+08            | 5.12.E+08            | 5.11.E+08            | 5.52.E+08            | 5.54.E+08            | 5.82.E+08            | 4.25.E+08            | 4.91.E+08            |
| 581 | Q8WX93-1  | palladin [OS=Homo sapiens]                                                              | 100.297       | 2.69.E+08         | 2.75.E+08         | 2.93.E+08         | 2.62.E+08         | 3.30.E+08            | 3.21.E+08            | 3.39.E+08            | 3.19.E+08            | 5.94.E+08            | 5.84.E+08            | 6.33.E+08            | 5.77.E+08            |
| 582 | Q13011    | Delta(3,5)-Delta(2,4)-dienoyl-CoA isomerase, mitochondrial [OS=Homo sapiens]            | 100.274       | 1.02.E+09         | 1.03.E+09         | 1.08.E+09         | 1.06.E+09         | 7.19.E+08            | 7.62.E+08            | 7.58.E+08            | 7.59.E+08            | 9.50.E+08            | 9.19.E+08            | 9.39.E+08            | 9.18.E+08            |
| 583 | Q6PIU2    | Neutral cholesterol ester hydrolase 1 [OS=Homo sapiens]                                 | 100.204       | 3.63.E+08         | 3.89.E+08         | 3.69.E+08         | 3.73.E+08         | 4.20.E+08            | 4.11.E+08            | 4.24.E+08            | 4.31.E+08            | 6.17.E+08            | 6.28.E+08            | 6.44.E+08            | 6.28.E+08            |
| 584 | Q96HE7    | ERO1-like protein alpha [OS=Homo sapiens]                                               | 100.198       | 3.11.E+08         | 2.93.E+08         | 2.79.E+08         | 3.12.E+08         | 2.93.E+08            | 3.13.E+08            | 3.13.E+08            | 3.15.E+08            | 3.17.E+08            | 3.15.E+08            | 3.36.E+08            | 3.34.E+08            |
| 585 | Q95571    | Persulfide dioxygenase ETHE1, mitochondrial [OS=Homo sapiens]                           | 100.135       | 4.86.E+08         | 4.79.E+08         | 4.88.E+08         | 4.68.E+08         | 5.74.E+08            | 5.52.E+08            | 5.57.E+08            | 5.49.E+08            | 5.18.E+08            | 4.84.E+08            | 4.93.E+08            | 4.90.E+08            |
| 586 | P50502    | Hsc70-interacting protein [OS=Homo sapiens]                                             | 100.116       | 1.00.E+09         | 1.06.E+09         | 1.08.E+09         | 1.01.E+09         | 9.08.E+08            | 8.71.E+08            | 9.22.E+08            | 9.42.E+08            | 1.16.E+09            | 1.15.E+09            | 1.18.E+09            | 1.17.E+09            |
| 587 | P53396-1  | ATP-citrate synthase [OS=Homo sapiens]                                                  | 100.056       | 3.58.E+08         | 3.53.E+08         | 3.77.E+08         | 3.85.E+08         | 3.85.E+08            | 3.55.E+08            | 3.53.E+08            | 3.28.E+08            | 3.17.E+08            | 3.08.E+08            | 3.45.E+08            | 3.58.E+08            |
| 588 | P29692-3  | Isoform 3 of Elongation factor 1-delta [OS=Homo sapiens]                                | 99.792        | 3.74.E+06         | 4.33.E+06         | 3.19.E+06         | 4.18.E+06         | 4.22.E+06            | 4.84.E+06            | 4.76.E+06            | 4.08.E+06            | 4.69.E+06            | 3.30.E+06            | 3.78.E+06            | 4.49.E+06            |
| 589 | P00533-1  | epidermal growth factor receptor [OS=Homo sapiens]                                      | 99.782        | 6.63.E+08         | 6.76.E+08         | 6.68.E+08         | 6.70.E+08         | 8.36.E+08            | 7.79.E+08            | 7.81.E+08            | 8.38.E+08            | 8.04.E+08            | 9.50.E+08            | 9.35.E+08            | 9.38.E+08            |
| 590 | Q9BTT0    | Acidic leucine-rich nuclear phosphoprotein 32 family member E [OS=Homo sapiens]         | 99.7          | 6.55.E+08         | 5.59.E+08         | 5.14.E+08         | 6.32.E+08         | 5.82.E+08            | 5.16.E+08            | 5.24.E+08            | 4.40.E+08            | 6.70.E+08            | 5.92.E+08            | 6.42.E+08            | 6.60.E+08            |
| 591 | Q9ULV4    | coronin-1C [OS=Homo sapiens]                                                            | 99.612        | 7.16.E+08         | 6.99.E+08         | 7.76.E+08         | 7.25.E+08         | 9.94.E+08            | 1.07.E+09            | 1.02.E+09            | 1.04.E+09            | 1.04.E+09            | 1.08.E+09            | 1.07.E+09            | 1.04.E+09            |
| 592 | Q9NVA2-1  | Septin-11 [OS=Homo sapiens]                                                             | 99.563        | 8.26.E+08         | 8.56.E+08         | 8.64.E+08         | 9.13.E+08         | 8.27.E+08            | 8.53.E+08            | 8.32.E+08            | 8.86.E+08            | 8.32.E+08            | 8.66.E+08            | 8.75.E+08            | 9.61.E+08            |
| 593 | Q9Y224    | UHP0568 protein C14orf166 [OS=Homo sapiens]                                             | 99.47         | 2.80.E+08         | 1.56.E+08         | 1.73.E+08         | 2.21.E+08         | 2.04.E+08            | 2.15.E+08            | 2.20.E+08            | 1.96.E+08            | 1.91.E+08            | 1.95.E+08            | 1.85.E+08            | 1.57.E+08            |
| 594 | P78417    | Glutathione S-transferase omega-1 [OS=Homo sapiens]                                     | 99.253        | 1.05.E+09         | 1.08.E+09         | 1.11.E+09         | 1.06.E+09         | 1.28.E+09            | 1.32.E+09            | 1.30.E+09            | 1.34.E+09            | 1.28.E+09            | 1.38.E+09            | 1.39.E+09            | 1.37.E+09            |
| 595 | Q70J99-1  | Protein unc-13 homolog D [OS=Homo sapiens]                                              | 98.913        | 1.99.E+08         | 1.37.E+08         | 1.26.E+08         | 1.71.E+08         | 1.90.E+08            | 2.47.E+08            | 1.51.E+08            | 1.12.E+08            | 1.99.E+08            | 1.12.E+08            | 1.10.E+08            | 1.21.E+08            |
| 596 | Q16630    | Cleavage and polyadenylation specificity factor subunit 6 [OS=Homo sapiens]             | 98.751        | 1.46.E+08         | 1.30.E+08         | 1.56.E+08         | 1.38.E+08         | 1.46.E+08            | 1.61.E+08            | 1.12.E+08            | 1.69.E+08            | 1.49.E+08            | 1.86.E+08            | 1.56.E+08            | 1.68.E+08            |
| 597 | Q9BX68    | Histidine triad nucleotide-binding protein 2, mitochondrial [OS=Homo sapiens]           | 98.656        | 1.01.E+09         | 9.96.E+08         | 9.21.E+08         | 9.95.E+08         | 6.83.E+08            | 9.91.E+08            | 9.70.E+08            | 8.66.E+08            | 9.57.E+08            | 9.13.E+08            | 8.66.E+08            | 9.29.E+08            |
| 598 | P46783    | 40S ribosomal protein S10 [OS=Homo sapiens]                                             | 98.648        | 1.47.E+09         | 1.43.E+09         | 1.50.E+09         | 1.63.E+09         | 1.55.E+09            | 1.68.E+09            | 1.49.E+09            | 1.52.E+09            | 1.57.E+09            | 1.70.E+09            | 1.62.E+09            | 1.60.E+09            |
| 599 | P55010    | Eukaryotic translation initiation factor 5 [OS=Homo sapiens]                            | 98.37         | 8.09.E+08         | 8.01.E+08         | 7.61.E+08         | 8.21.E+08         | 8.39.E+08            | 8.62.E+08            | 8.06.E+08            | 8.23.E+08            | 9.59.E+08            | 8.88.E+08            | 8.59.E+08            | 8.63.E+08            |
| 600 | Q9H6S3    | epidermal growth factor receptor kinase substrate 8-like protein 2 [OS=Homo sapiens]    | 98.263        | 1.30.E+08         | 1.21.E+08         | 1.10.E+08         | 9.15.E+07         | 1.83.E+08            | 1.88.E+08            | 1.91.E+08            | 1.81.E+08            | 1.36.E+08            | 1.36.E+08            | 1.29.E+08            | 1.17.E+08            |
| 601 | P62888    | 60S ribosomal protein L30 [OS=Homo sapiens]                                             | 98.154        | 1.45.E+09         | 1.50.E+09         | 1.46.E+09         | 1.46.E+09         | 1.35.E+09            | 1.38.E+09            | 1.41.E+09            | 1.44.E+09            | 1.39.E+09            | 1.32.E+09            | 1.34.E+09            | 1.34.E+09            |
| 602 | P25789    | Proteasome subunit alpha type-4 [OS=Homo sapiens]                                       | 98.139        | 6.35.E+08         | 6.19.E+08         | 6.23.E+08         | 6.16.E+08         | 5.62.E+08            | 5.42.E+08            | 5.61.E+08            | 5.42.E+08            | 6.51.E+08            | 6.20.E+08            | 6.34.E+08            | 6.28.E+08            |
| 603 | P19971    | thymidine phosphorylase [OS=Homo sapiens]                                               | 98            | 5.67.E+08         | 5.40.E+08         | 5.41.E+08         | 4.90.E+08         | 6.14.E+08            | 6.08.E+08            | 6.41.E+08            | 6.06.E+08            | 6.62.E+08            | 6.66.E+08            | 6.11.E+08            | 5.98.E+08            |
| 604 | P06132    | Uroporphyrinogen decarboxylase [OS=Homo sapiens]                                        | 97.81         | 2.41.E+08         | 2.25.E+08         | 2.27.E+08         | 2.41.E+08         | 1.87.E+08            | 2.09.E+08            | 1.47.E+08            | 1.24.E+08            | 2.82.E+08            | 3.13.E+08            | 2.85.E+08            | 2.71.E+08            |
| 605 | Q02543    | 60S ribosomal protein L18a [OS=Homo sapiens]                                            | 97.334        | 1.89.E+09         | 1.93.E+09         | 1.96.E+09         | 1.97.E+09         | 1.96.E+09            | 1.99.E+09            | 1.94.E+09            | 2.02.E+09            | 1.77.E+09            | 1.80.E+09            | 1.79.E+09            | 1.74.E+09            |
| 606 | P20810-1  | Calpastatin [OS=Homo sapiens]                                                           | 97.27         | 3.37.E+08         | 3.00.E+08         | 3.39.E+08         | 3.45.E+08         | 3.92.E+08            | 3.66.E+08            | 3.81.E+08            | 3.76.E+08            | 3.36.E+08            | 3.46.E+08            | 3.65.E+08            | 3.68.E+08            |
| 607 | Q99439    | Calponin-2 [OS=Homo sapiens]                                                            | 97.166        | 4.83.E+08         | 4.61.E+08         | 4.53.E+08         | 4.39.E+08         | 4.34.E+08            | 4.24.E+08            | 4.08.E+08            | 4.09.E+08            | 6.19.E+08            | 6.09.E+08            | 6.74.E+08            | 7.60.E+08            |
| 608 | P51665    | 26S proteasome non-ATPase regulatory subunit 7 [OS=Homo sapiens]                        | 96.941        | 6.66.E+08         | 6.18.E+08         | 6.31.E+08         | 7.95.E+08         | 6.22.E+08            | 5.99.E+08            | 6.58.E+08            | 6.10.E+08            | 6.80.E+08            | 7.81.E+08            | 7.51.E+08            | 7.21.E+08            |
| 609 | Q86V81    | THO complex subunit 4 [OS=Homo sapiens]                                                 | 96.357        | 9.20.E+08         | 9.36.E+08         | 9.23.E+08         | 8.58.E+08         | 8.54.E+08            | 8.34.E+08            | 8.03.E+08            | 8.01.E+08            | 8.19.E+08            | 8.14.E+08            | 7.43.E+08            | 7.95.E+08            |
| 610 | Q9BR76    | Coronin-1B [OS=Homo sapiens]                                                            | 96.174        | 7.00.E+08         | 6.22.E+08         | 5.99.E+08         | 6.75.E+08         | 6.62.E+08            | 6.49.E+08            | 6.84.E+08            | 6.58.E+08            | 6.37.E+08            | 6.64.E+08            | 6.16.E+08            | 6.38.E+08            |
| 611 | P14550    | alcohol dehydrogenase [NADP(+)] [OS=Homo sapiens]                                       | 95.941        | 4.81.E+08         | 4.25.E+08         | 4.66.E+08         | 4.61.E+08         | 3.80.E+08            | 4.04.E+08            | 4.30.E+08            | 3.99.E+08            | 5.38.E+08            | 5.47.E+08            | 5.39.E+08            | 5.43.E+08            |
| 612 | P09525    | annexin A4 [OS=Homo sapiens]                                                            | 95.7          | 5.85.E+08         | 5.41.E+08         | 5.65.E+08         | 5.31.E+08         | 9.64.E+08            | 7.35.E+08            | 7.28.E+08            | 7.36.E+08            | 1.05.E+09            | 1.25.E+09            | 1.26.E+09            | 1.23.E+09            |
| 613 | Q13151    | Heterogeneous nuclear ribonucleoprotein A0 [OS=Homo sapiens]                            | 95.658        | 3.47.E+08         | 3.68.E+08         | 3.37.E+08         | 3.48.E+08         | 3.79.E+08            | 3.67.E+08            | 3.67.E+08            | 3.51.E+08            | 3.39.E+08            | 3.49.E+08            | 3.77.E+08            | 3.61.E+08            |
| 614 | P53992    | Protein transport protein sec24c [OS=Homo sapiens]                                      | 95.615        | 2.64.E+08         | 2.79.E+08         | 2.53.E+08         | 2.56.E+08         | 2.76.E+08            | 2.72.E+08            | 2.53.E+08            | 2.60.E+08            | 2.95.E+08            | 2.85.E+08            | 3.20.E+08            | 3.04.E+08            |
| 615 | P39748    | Flap endonuclease 1 [OS=Homo sapiens]                                                   | 95.603        | 7.79.E+08         | 7.81.E+08         | 7.68.E+08         | 6.54.E+08         | 7.10.E+08            | 6.24.E+08            | 6.38.E+08            | 6.61.E+08            | 6.01.E+08            | 6.83.E+08            | 7.35.E+08            | 6.77.E+08            |
| 616 | P31150    | Rab GDP dissociation inhibitor alpha [OS=Homo sapiens]                                  | 95.567        | 2.70.E+07         | 8.39.E+06         | 1.96.E+07         | 1.01.E+07         | 7.22.E+06            | 1.91.E+07            | 1.73.E+07            | 1.61.E+07            | 8.93.E+06            | 1.99.E+07            | 7.50.E+06            | 2.27.E+07            |
| 617 | Q12931    | heat shock protein 75 kDa, mitochondrial [OS=Homo sapiens]                              | 95.482        | 3.86.E+08         | 4.16.E+08         | 4.06.E+08         | 3.31.E+08         | 3.52.E+08            | 2.90.E+08            | 3.67.E+08            | 3.62.E+08            | 5.03.E+08            | 4.83.E+08            | 4.50.E+08            | 4.20.E+08            |
| 618 | P55327    | Tumor protein D52 [OS=Homo sapiens]                                                     | 95.314        | 5.85.E+08         | 5.68.E+08         | 5.76.E+08         | 5.92.E+08         | 4.91.E+08            | 4.89.E+08            | 5.02.E+08            | 5.03.E+08            | 6.23.E+08            | 6.39.E+08            | 5.82.E+08            | 6.20.E+08            |
| 619 | P54886    | delta-1-pyrroline-5-carboxylate synthase [OS=Homo sapiens]                              | 94.737        | 3.80.E+08         | 3.69.E+08         | 3.69.E+08         | 3.78.E+08         | 3.55.E+08            | 3.77.E+08            | 3.91.E+08            | 3.56.E+08            | 4.18.E+08            | 4.21.E+08            | 3.98.E+08            | 3.97.E+08            |
| 620 | P30084    | Enoyl-CoA hydratase, mitochondrial [OS=Homo sapiens]                                    | 94.669        | 4.44.E+08         | 4.27.E+08         | 4.16.E+08         | 4.87.E+08         | 4.19.E+08            | 4.34.E+08            | 4.25.E+08            | 3.93.E+08            | 4.56.E+08            | 4.98.E+08            | 4.46.E+08            | 5.11.E+08            |
| 621 | Q9H4M9    | EH domain-containing protein 1 [OS=Homo sapiens]                                        | 94.606        | 4.16.E+08         | 4.32.E+08         | 3.51.E+08         | 4.02.E+08         | 4.49.E+08            | 3.98.E+08            | 4.01.E+08            | 3.89.E+08            | 3.93.E+08            | 4.44.E+08            | 4.20.E+08            | 4.37.E+08            |
| 622 | P20674    | Cytochrome c oxidase subunit 5A, mitochondrial [OS=Homo sapiens]                        | 94.552        | 8.29.E+08         | 8.29.E+08         | 8.48.E+08         | 9.14.E+08         | 7.95.E+08            | 7.82.E+08            | 7.93.E+08            | 7.71.E+08            | 7.69.E+08            | 8.00.E+08            | 8.07.E+08            | 8.36.E+08            |
| 623 | P26196    | Probable ATP-dependent RNA helicase DDX6 [OS=Homo sapiens]                              | 94.096        | 3.45.E+08         | 3.62.E+08         | 3.55.E+08         | 3.38.E+08         | 3.99.E+08            | 3.65.E+08            | 3.57.E+08            | 3.58.E+08            | 4.13.E+08            | 3.81.E+08            | 3.76.E+08            | 3.96.E+08            |
| 624 | A1L0T0    | Acetolactate synthase-like protein [OS=Homo sapiens]                                    | 93.883        | 1.66.E+08         | 9.91.E+07         | 1.47.E+08         | 1.56.E+08         | 5.18.E+07            | 6.12.E+07            | 6.07.E+07            | 8.40.E+07            | 2.40.E+08            | 2.33.E+08            | 2.90.E+08            | 2.65.E+08            |
| 625 | P60900    | Proteasome subunit alpha type-6 [OS=Homo sapiens]                                       | 93.777        | 8.67.E+08         | 9.44.E+08         | 8.56.E+08         | 9.76.E+08         | 8.17.E+08            | 8.14.E+08            | 8.66.E+08            | 7.47.E+08            | 8.97.E+08            | 9.48.E+08            | 8.62.E+08            | 9.77.E+08            |
| 626 | Q95433    | activator of 90 kDa heat shock protein ATPase homolog 1 [OS=Homo sapiens]               | 93.73         | 6.10.E+08         | 6.03.E+08         | 6.25.E+08         | 6.52.E+08         | 5.75.E+08            | 5.73.E+08            | 5.68.E+08            | 5.58.E+08            | 6.08.E+08            | 6.35.E+08            | 6.21.E+08            | 6.08.E+08            |
| 627 | P55265-1  | Double-stranded RNA-specific adenosine deaminase [OS=Homo sapiens]                      | 93.622        | 4.00.E+08         | 4.61.E+08         | 3.87.E+08         | 4.49.E+08         | 3.78.E+08            | 3.91.E+08            | 3.62.E+08            | 3.76.E+08            | 4.92.E+08            | 4.98.E+08            | 4.56.E+08            | 4.93.E+08            |
| 628 | P20290-1  | transcription factor BTF3 [OS=Homo sapiens]                                             | 93.334        | 5.05.E+08         | 4.39.E+08         | 4.40.E+08         | 4.64.E+08         | 3.84.E+08            | 3.94.E+08            | 3.99.E+08            | 4.19.E+08            | 3.81.E+08            | 3.56.E+08            | 3.63.E+08            | 3.95.E+08            |

| No. | Accession | Description                                                                                                                      | Sum PEP Score | CTRL Abundances_1 | CTRL Abundances_2 | CTRL Abundances_3 | CTRL Abundances_4 | CLDN6-1 Abundances_1 | CLDN6-1 Abundances_2 | CLDN6-1 Abundances_3 | CLDN6-1 Abundances_4 | CLDN6-2 Abundances_1 | CLDN6-2 Abundances_2 | CLDN6-2 Abundances_3 | CLDN6-2 Abundances_4 |
|-----|-----------|----------------------------------------------------------------------------------------------------------------------------------|---------------|-------------------|-------------------|-------------------|-------------------|----------------------|----------------------|----------------------|----------------------|----------------------|----------------------|----------------------|----------------------|
| 629 | Q13435    | Splicing factor 3b subunit 2 [OS=Homo sapiens]                                                                                   | 93.274        | 4.73.E+08         | 3.78.E+08         | 5.02.E+08         | 4.88.E+08         | 4.37.E+08            | 4.52.E+08            | 3.92.E+08            | 4.29.E+08            | 5.19.E+08            | 5.36.E+08            | 6.50.E+08            | 5.52.E+08            |
| 630 | O00204    | Sulfotransferase family cytosolic 2B member 1 [OS=Homo sapiens]                                                                  | 93.268        | 2.81.E+08         | 2.97.E+08         | 3.10.E+08         | 3.07.E+08         | 3.16.E+08            | 3.14.E+08            | 3.13.E+08            | 2.97.E+08            | 3.05.E+08            | 3.24.E+08            | 3.20.E+08            | 3.14.E+08            |
| 631 | P28074-1  | proteasome subunit beta type-5 [OS=Homo sapiens]                                                                                 | 93.194        | 1.06.E+09         | 1.08.E+09         | 1.09.E+09         | 9.49.E+08         | 1.03.E+09            | 1.08.E+09            | 1.06.E+09            | 9.83.E+08            | 2.58.E+08            | 1.02.E+09            | 9.69.E+08            | 8.85.E+08            |
| 632 | P55084    | Trifunctional enzyme subunit beta, mitochondrial [OS=Homo sapiens]                                                               | 93.192        | 5.40.E+08         | 5.24.E+08         | 5.75.E+08         | 5.20.E+08         | 4.19.E+08            | 4.64.E+08            | 4.29.E+08            | 4.04.E+08            | 6.64.E+08            | 7.47.E+08            | 6.36.E+08            | 7.88.E+08            |
| 633 | Q68CZ2-1  | Tensin-3 [OS=Homo sapiens]                                                                                                       | 93.145        | 2.12.E+08         | 2.40.E+08         | 2.81.E+08         | 2.59.E+08         | 1.75.E+08            | 2.03.E+08            | 2.20.E+08            | 3.02.E+08            | 3.16.E+08            | 4.41.E+08            | 4.54.E+08            | 3.71.E+08            |
| 634 | O00231    | 26S proteasome non-ATPase regulatory subunit 11 [OS=Homo sapiens]                                                                | 92.943        | 6.70.E+08         | 5.08.E+08         | 6.23.E+08         | 5.55.E+08         | 5.31.E+08            | 5.23.E+08            | 5.84.E+08            | 6.02.E+08            | 7.55.E+08            | 6.90.E+08            | 9.42.E+08            | 6.57.E+08            |
| 635 | P51149    | ras-related protein Rab-7a [OS=Homo sapiens]                                                                                     | 92.523        | 6.65.E+08         | 6.47.E+08         | 7.26.E+08         | 7.04.E+08         | 6.54.E+08            | 6.26.E+08            | 6.71.E+08            | 6.14.E+08            | 7.68.E+08            | 7.52.E+08            | 7.34.E+08            | 7.61.E+08            |
| 636 | Q6PKG0-1  | La-related protein 1 [OS=Homo sapiens]                                                                                           | 91.672        | 2.46.E+08         | 1.88.E+08         | 2.48.E+08         | 1.96.E+08         | 2.17.E+08            | 1.84.E+08            | 1.79.E+08            | 1.79.E+08            | 1.83.E+08            | 2.11.E+08            | 2.14.E+08            | 2.18.E+08            |
| 637 | P48047    | ATP synthase subunit O, mitochondrial [OS=Homo sapiens]                                                                          | 91.385        | 5.97.E+08         | 6.08.E+08         | 6.03.E+08         | 5.94.E+08         | 6.16.E+08            | 6.12.E+08            | 6.13.E+08            | 6.11.E+08            | 7.51.E+08            | 7.50.E+08            | 7.54.E+08            | 7.57.E+08            |
| 638 | Q14134-1  | Tripartite motif-containing protein 29 [OS=Homo sapiens]                                                                         | 91.126        | 3.55.E+08         | 3.54.E+08         | 3.59.E+08         | 3.72.E+08         | 5.38.E+08            | 5.69.E+08            | 5.77.E+08            | 6.00.E+08            | 4.62.E+08            | 4.84.E+08            | 4.49.E+08            | 4.49.E+08            |
| 639 | P22695    | Cytochrome b-c1 complex subunit 2, mitochondrial [OS=Homo sapiens]                                                               | 90.799        | 4.62.E+08         | 4.72.E+08         | 4.77.E+08         | 4.50.E+08         | 3.99.E+08            | 3.88.E+08            | 4.03.E+08            | 4.19.E+08            | 4.79.E+08            | 4.44.E+08            | 4.45.E+08            | 4.31.E+08            |
| 640 | Q9Y2W1    | Thyroid hormone receptor-associated protein 3 [OS=Homo sapiens]                                                                  | 90.74         | 3.79.E+08         | 4.57.E+08         | 4.71.E+08         | 4.58.E+08         | 4.44.E+08            | 4.61.E+08            | 4.44.E+08            | 4.82.E+08            | 4.50.E+08            | 5.24.E+08            | 5.15.E+08            | 4.99.E+08            |
| 641 | Q16891    | MICOS complex subunit Mic60 [OS=Homo sapiens]                                                                                    | 90.678        | 2.76.E+08         | 2.66.E+08         | 2.50.E+08         | 2.83.E+08         | 2.51.E+08            | 2.55.E+08            | 2.54.E+08            | 2.49.E+08            | 2.35.E+08            | 2.90.E+08            | 2.92.E+08            | 3.04.E+08            |
| 642 | P08754    | Guanine nucleotide-binding protein G(k) subunit alpha [OS=Homo sapiens]                                                          | 90.442        | 3.42.E+08         | 3.57.E+08         | 3.57.E+08         | 3.35.E+08         | 3.36.E+08            | 3.46.E+08            | 3.45.E+08            | 3.51.E+08            | 3.19.E+08            | 3.29.E+08            | 3.25.E+08            | 3.22.E+08            |
| 643 | P05023    | Sodium/potassium-transporting ATPase subunit alpha-1 [OS=Homo sapiens]                                                           | 90.393        | 7.61.E+08         | 7.47.E+08         | 7.39.E+08         | 7.31.E+08         | 7.99.E+08            | 8.26.E+08            | 8.42.E+08            | 8.31.E+08            | 9.50.E+08            | 8.30.E+08            | 9.15.E+08            | 9.34.E+08            |
| 644 | O43399    | Tumor protein D54 [OS=Homo sapiens]                                                                                              | 90.367        | 8.27.E+08         | 7.96.E+08         | 7.83.E+08         | 7.31.E+08         | 7.38.E+08            | 7.37.E+08            | 7.44.E+08            | 7.37.E+08            | 8.64.E+08            | 8.28.E+08            | 8.16.E+08            | 8.07.E+08            |
| 645 | P50579    | methionine aminopeptidase 2 [OS=Homo sapiens]                                                                                    | 90.316        | 1.66.E+08         | 1.63.E+08         | 1.73.E+08         | 1.68.E+08         | 1.77.E+08            | 1.73.E+08            | 1.57.E+08            | 1.81.E+08            | 1.50.E+08            | 1.52.E+08            | 1.54.E+08            | 1.49.E+08            |
| 646 | P63313    | thymosin beta-10 [OS=Homo sapiens]                                                                                               | 90.213        | 2.21.E+09         | 2.20.E+09         | 2.15.E+09         | 2.14.E+09         | 1.96.E+09            | 1.87.E+09            | 1.90.E+09            | 1.95.E+09            | 2.25.E+09            | 2.04.E+09            | 2.08.E+09            | 2.00.E+09            |
| 647 | Q99733    | Nucleosome assembly protein 1-like 4 [OS=Homo sapiens]                                                                           | 90.193        | 2.27.E+08         | 2.16.E+08         | 2.18.E+08         | 1.72.E+08         | 1.85.E+08            | 1.80.E+08            | 2.55.E+08            | 1.79.E+08            | 2.43.E+08            | 2.65.E+08            | 2.64.E+08            | 2.54.E+08            |
| 648 | P27816-1  | Microtubule-associated protein 4 [OS=Homo sapiens]                                                                               | 89.73         | 1.95.E+08         | 2.01.E+08         | 2.20.E+08         | 2.18.E+08         | 2.44.E+08            | 2.58.E+08            | 2.71.E+08            | 2.66.E+08            | 2.13.E+08            | 2.55.E+08            | 2.71.E+08            | 2.54.E+08            |
| 649 | P68400    | Casein kinase II subunit alpha [OS=Homo sapiens]                                                                                 | 89.645        | 3.13.E+08         | 2.63.E+08         | 2.93.E+08         | 3.19.E+08         | 2.96.E+08            | 2.87.E+08            | 2.05.E+08            | 2.78.E+08            | 3.14.E+08            | 3.08.E+08            | 3.22.E+08            | 3.25.E+08            |
| 650 | P00352    | Retinal dehydrogenase 1 [OS=Homo sapiens]                                                                                        | 89.316        | 1.63.E+09         | 1.71.E+09         | 9.51.E+08         | 8.63.E+08         | 7.33.E+08            | 6.96.E+08            | 7.40.E+08            | 7.04.E+08            | 6.55.E+08            | 1.52.E+09            | 7.17.E+08            | 6.55.E+08            |
| 651 | Q9UN52    | COP9 signalosome complex subunit 3 [OS=Homo sapiens]                                                                             | 88.76         | 3.09.E+08         | 2.47.E+08         | 2.54.E+08         | 2.79.E+08         | 2.48.E+08            | 3.05.E+08            | 2.78.E+08            | 2.41.E+08            | 2.39.E+08            | 2.38.E+08            | 2.32.E+08            | 2.39.E+08            |
| 652 | P24666-1  | Low molecular weight phosphotyrosine protein phosphatase [OS=Homo sapiens]                                                       | 88.556        | 5.04.E+08         | 5.49.E+08         | 5.59.E+08         | 5.69.E+08         | 4.66.E+08            | 5.61.E+08            | 4.06.E+08            | 5.36.E+08            | 5.44.E+08            | 5.24.E+08            | 5.19.E+08            | 5.37.E+08            |
| 653 | Q53GQ0    | Very-long-chain 3-oxoacyl-CoA reductase [OS=Homo sapiens]                                                                        | 88.481        | 3.75.E+08         | 3.31.E+08         | 3.08.E+08         | 4.12.E+08         | 3.13.E+08            | 3.40.E+08            | 3.56.E+08            | 2.95.E+08            | 3.77.E+08            | 3.80.E+08            | 3.70.E+08            | 4.05.E+08            |
| 654 | Q9NQC3-2  | Isoform 2 of Reticulon-4 [OS=Homo sapiens]                                                                                       | 88.31         | 6.12.E+08         | 5.70.E+08         | 6.71.E+08         | 5.74.E+08         | 1.00.E+09            | 1.03.E+09            | 8.80.E+08            | 1.02.E+09            | 9.85.E+08            | 1.05.E+09            | 9.20.E+08            | 1.07.E+09            |
| 655 | Q15417    | Calponin-3 [OS=Homo sapiens]                                                                                                     | 87.874        | 2.86.E+08         | 2.72.E+08         | 2.75.E+08         | 2.55.E+08         | 5.74.E+08            | 5.52.E+08            | 5.08.E+08            | 4.55.E+08            | 3.28.E+08            | 3.21.E+08            | 3.50.E+08            | 3.37.E+08            |
| 656 | E9PAV3    | Nascent polypeptide-associated complex subunit alpha, muscle-specific form [OS=Homo sapiens]                                     | 87.469        | 1.20.E+09         | 1.28.E+09         | 1.23.E+09         | 1.21.E+09         | 1.06.E+09            | 1.04.E+09            | 1.07.E+09            | 1.06.E+09            | 1.23.E+09            | 1.18.E+09            | 1.18.E+09            | 1.15.E+09            |
| 657 | P62829    | 60S ribosomal protein L23 [OS=Homo sapiens]                                                                                      | 87.226        | 1.96.E+09         | 1.94.E+09         | 1.93.E+09         | 1.85.E+09         | 1.77.E+09            | 1.74.E+09            | 1.75.E+09            | 1.77.E+09            | 1.80.E+09            | 1.72.E+09            | 1.80.E+09            | 1.85.E+09            |
| 658 | Q9HBI6    | Phylloquinone omega-hydroxylase CYP4F11 [OS=Homo sapiens]                                                                        | 86.89         | 4.95.E+08         | 4.75.E+08         | 5.12.E+08         | 4.88.E+08         | 4.57.E+08            | 4.16.E+08            | 4.18.E+08            | 4.34.E+08            | 3.04.E+08            | 3.26.E+08            | 3.51.E+08            | 3.48.E+08            |
| 659 | O15347    | High mobility group protein B3 [OS=Homo sapiens]                                                                                 | 86.686        | 3.18.E+08         | 3.41.E+08         | 4.16.E+08         | 3.87.E+08         | 1.97.E+08            | 2.10.E+08            | 2.10.E+08            | 2.05.E+08            | 6.36.E+08            | 6.36.E+08            | 7.05.E+08            | 7.11.E+08            |
| 660 | P62269    | 40S ribosomal protein S18 [OS=Homo sapiens]                                                                                      | 86.669        | 3.95.E+09         | 4.07.E+09         | 4.26.E+09         | 4.17.E+09         | 3.90.E+09            | 4.01.E+09            | 4.05.E+09            | 4.06.E+09            | 3.54.E+09            | 3.69.E+09            | 3.74.E+09            | 3.72.E+09            |
| 661 | Q8IUE6    | Histone H2A type 2-B [OS=Homo sapiens]                                                                                           | 86.646        | 2.73.E+09         | 2.22.E+09         | 2.36.E+09         | 2.45.E+09         | 2.20.E+09            | 2.16.E+09            | 2.30.E+09            | 2.21.E+09            | 2.22.E+09            | 2.36.E+09            | 2.31.E+09            | 2.38.E+09            |
| 662 | P63220    | 40S ribosomal protein S21 [OS=Homo sapiens]                                                                                      | 86.303        | 1.37.E+09         | 1.35.E+09         | 1.34.E+09         | 1.35.E+09         | 1.31.E+09            | 1.28.E+09            | 1.36.E+09            | 1.36.E+09            | 1.21.E+09            | 1.25.E+09            | 1.32.E+09            | 1.28.E+09            |
| 663 | Q9NR31    | GTP-binding protein SAR1a [OS=Homo sapiens]                                                                                      | 86.268        | 1.33.E+08         | 1.13.E+08         | 1.19.E+08         | 1.33.E+08         | 1.04.E+08            | 1.16.E+08            | 1.14.E+08            | 9.42.E+07            | 1.03.E+08            | 1.11.E+08            | 1.09.E+08            | 1.07.E+08            |
| 664 | Q15056-1  | Eukaryotic translation initiation factor 4H [OS=Homo sapiens]                                                                    | 86.255        | 7.24.E+08         | 7.29.E+08         | 7.36.E+08         | 7.90.E+08         | 5.97.E+08            | 6.37.E+08            | 6.26.E+08            | 6.48.E+08            | 7.32.E+08            | 7.45.E+08            | 7.49.E+08            | 7.42.E+08            |
| 665 | Q13409-1  | cytoplasmic dynein 1 intermediate chain 2 [OS=Homo sapiens]                                                                      | 86.196        | 1.42.E+08         | 1.44.E+08         | 1.54.E+08         | 1.45.E+08         | 1.87.E+08            | 1.81.E+08            | 1.74.E+08            | 1.80.E+08            | 1.79.E+08            | 1.89.E+08            | 1.96.E+08            | 2.00.E+08            |
| 666 | P52907    | F-actin-capping protein subunit alpha-1 [OS=Homo sapiens]                                                                        | 86.158        | 7.08.E+08         | 7.36.E+08         | 7.59.E+08         | 7.24.E+08         | 7.47.E+08            | 7.62.E+08            | 7.64.E+08            | 7.74.E+08            | 8.89.E+08            | 8.56.E+08            | 8.75.E+08            | 9.12.E+08            |
| 667 | Q9UK76    | Jupiter microtubule associated homolog 1 [OS=Homo sapiens]                                                                       | 85.723        | 6.95.E+08         | 6.91.E+08         | 6.93.E+08         | 6.94.E+08         | 8.06.E+08            | 8.05.E+08            | 8.19.E+08            | 8.55.E+08            | 6.17.E+08            | 5.95.E+08            | 6.06.E+08            | 5.71.E+08            |
| 668 | P62249    | 40S ribosomal protein S16 [OS=Homo sapiens]                                                                                      | 85.536        | 3.56.E+09         | 3.46.E+09         | 3.67.E+09         | 3.53.E+09         | 3.53.E+09            | 3.50.E+09            | 3.58.E+09            | 3.67.E+09            | 3.21.E+09            | 3.27.E+09            | 3.29.E+09            | 3.34.E+09            |
| 669 | P05091    | Aldehyde dehydrogenase, mitochondrial [OS=Homo sapiens]                                                                          | 85.481        | 3.63.E+08         | 3.52.E+08         | 3.74.E+08         | 3.51.E+08         | 2.57.E+08            | 2.44.E+08            | 2.20.E+08            | 2.48.E+08            | 3.33.E+08            | 3.00.E+08            | 3.14.E+08            | 2.94.E+08            |
| 670 | Q07955-1  | Serine/arginine-rich splicing factor 1 [OS=Homo sapiens]                                                                         | 85.285        | 1.49.E+09         | 1.35.E+09         | 1.47.E+09         | 1.53.E+09         | 1.25.E+09            | 1.58.E+09            | 1.44.E+09            | 1.20.E+09            | 1.65.E+09            | 1.51.E+09            | 1.50.E+09            | 1.52.E+09            |
| 671 | P25325    | 3-mercaptopurinate sulfinyltransferase [OS=Homo sapiens]                                                                         | 85.269        | 2.33.E+08         | 1.89.E+08         | 1.86.E+08         | 2.05.E+08         | 1.87.E+08            | 1.77.E+08            | 1.79.E+08            | 1.78.E+08            | 2.29.E+08            | 2.35.E+08            | 2.25.E+08            | 2.26.E+08            |
| 672 | P36957    | Dihydropyrimidine-residue succinyltransferase component of 2-oxoglutarate dehydrogenase complex, mitochondrial [OS=Homo sapiens] | 85.266        | 1.62.E+09         | 1.59.E+09         | 1.62.E+09         | 1.61.E+09         | 1.56.E+09            | 1.52.E+09            | 1.60.E+09            | 1.63.E+09            | 1.74.E+09            | 1.64.E+09            | 1.63.E+09            | 1.64.E+09            |
| 673 | P50213-1  | Isocitrate dehydrogenase [NAD] subunit alpha, mitochondrial [OS=Homo sapiens]                                                    | 85.111        | 4.77.E+08         | 3.87.E+08         | 3.87.E+08         | 4.07.E+08         | 4.73.E+08            | 4.25.E+08            | 3.63.E+08            | 4.16.E+08            | 4.27.E+08            | 3.52.E+08            | 4.31.E+08            | 4.29.E+08            |
| 674 | Q07020    | 60S ribosomal protein L18 [OS=Homo sapiens]                                                                                      | 85.028        | 2.46.E+09         | 2.52.E+09         | 2.67.E+09         | 2.66.E+09         | 2.54.E+09            | 2.60.E+09            | 2.53.E+09            | 2.60.E+09            | 2.30.E+09            | 2.47.E+09            | 2.44.E+09            | 2.51.E+09            |
| 675 | Q7L2H7    | Eukaryotic translation initiation factor 3 subunit M [OS=Homo sapiens]                                                           | 84.714        | 3.04.E+08         | 2.71.E+08         | 2.65.E+08         | 2.27.E+08         | 2.86.E+08            | 2.95.E+08            | 3.02.E+08            | 2.95.E+08            | 3.18.E+08            | 3.13.E+08            | 3.12.E+08            | 3.37.E+08            |
| 676 | Q9P0L0    | vesicle-associated membrane protein-associated protein A [OS=Homo sapiens]                                                       | 84.673        | 2.20.E+08         | 2.33.E+08         | 2.22.E+08         | 2.10.E+08         | 2.23.E+08            | 2.43.E+08            | 2.40.E+08            | 2.02.E+08            | 2.46.E+08            | 2.10.E+08            | 2.40.E+08            | 2.34.E+08            |
| 677 | Q14258    | E3 ubiquitin/ISG15 ligase TRIM25 [OS=Homo sapiens]                                                                               | 84.618        | 1.75.E+08         | 1.69.E+08         | 1.66.E+08         | 1.77.E+08         | 1.86.E+08            | 1.83.E+08            | 1.86.E+08            | 1.78.E+08            | 1.60.E+08            | 1.56.E+08            | 1.62.E+08            | 1.64.E+08            |
| 678 | Q96C90    | Protein phosphatase 1 regulatory subunit 14B [OS=Homo sapiens]                                                                   | 84.528        | 2.65.E+08         | 2.53.E+08         | 2.67.E+08         | 2.50.E+08         | 4.04.E+08            | 3.96.E+08            | 3.97.E+08            | 3.60.E+08            | 2.51.E+08            | 2.43.E+08            | 2.62.E+08            | 2.61.E+08            |
| 679 | Q9BWD1    | Acetyl-CoA acetyltransferase, cytosolic [OS=Homo sapiens]                                                                        | 84.461        | 4.45.E+08         | 4.05.E+08         | 3.99.E+08         | 4.14.E+08         | 3.64.E+08            | 3.57.E+08            | 3.63.E+08            | 3.61.E+08            | 3.33.E+08            | 3.24.E+08            | 3.28.E+08            | 3.40.E+08            |
| 680 | P00367    | Glutamate dehydrogenase 1, mitochondrial [OS=Homo sapiens]                                                                       | 84.328        | 4.14.E+08         | 4.35.E+08         | 4.37.E+08         | 4.43.E+08         | 4.66.E+08            | 4.66.E+08            | 4.68.E+08            | 4.58.E+08            | 4.70.E+08            | 4.64.E+08            | 4.45.E+08            | 4.38.E+08            |

| No. | Accession | Description                                                                            | Sum PEP Score | CTRL Abundances_1 | CTRL Abundances_2 | CTRL Abundances_3 | CTRL Abundances_4 | CLDN6-1 Abundances_1 | CLDN6-1 Abundances_2 | CLDN6-1 Abundances_3 | CLDN6-1 Abundances_4 | CLDN6-2 Abundances_1 | CLDN6-2 Abundances_2 | CLDN6-2 Abundances_3 | CLDN6-2 Abundances_4 |
|-----|-----------|----------------------------------------------------------------------------------------|---------------|-------------------|-------------------|-------------------|-------------------|----------------------|----------------------|----------------------|----------------------|----------------------|----------------------|----------------------|----------------------|
| 681 | P29692-4  | Isoform 4 of Elongation factor 1-delta [OS=Homo sapiens]                               | 84.13         | 2.35.E+07         | 7.08.E+06         | 2.65.E+07         | 2.35.E+07         | 2.54.E+07            | 7.64.E+06            | 2.49.E+07            | 7.14.E+06            | 3.08.E+07            | 4.94.E+07            | 8.94.E+06            | 4.66.E+07            |
| 682 | Q10567-3  | Isoform C of AP-1 complex subunit beta-1 [OS=Homo sapiens]                             | 83.952        | 1.29.E+08         | 1.29.E+08         | 1.42.E+08         | 1.34.E+08         | 1.42.E+08            | 1.54.E+08            | 1.58.E+08            | 1.52.E+08            | 1.49.E+08            | 1.52.E+08            | 1.62.E+08            | 1.56.E+08            |
| 683 | P49720    | proteasome subunit beta type-3 [OS=Homo sapiens]                                       | 83.833        | 5.64.E+08         | 5.47.E+08         | 5.50.E+08         | 5.84.E+08         | 5.41.E+08            | 4.96.E+08            | 5.08.E+08            | 4.75.E+08            | 5.07.E+08            | 5.07.E+08            | 5.10.E+08            | 5.37.E+08            |
| 684 | P60981-1  | Destrin [OS=Homo sapiens]                                                              | 83.738        | 6.61.E+08         | 7.04.E+08         | 7.06.E+08         | 7.37.E+08         | 6.68.E+08            | 6.94.E+08            | 7.11.E+08            | 6.85.E+08            | 8.27.E+08            | 8.11.E+08            | 7.62.E+08            | 7.89.E+08            |
| 685 | P06703    | protein S100-A6 [OS=Homo sapiens]                                                      | 83.727        | 2.90.E+08         | 3.01.E+08         | 2.90.E+08         | 3.34.E+08         | 4.66.E+08            | 4.45.E+08            | 4.18.E+08            | 4.35.E+08            | 4.05.E+08            | 4.03.E+08            | 4.12.E+08            | 3.88.E+08            |
| 686 | P50238    | Cysteine-rich protein 1 [OS=Homo sapiens]                                              | 83.677        | 4.64.E+09         | 4.90.E+09         | 4.85.E+09         | 5.02.E+09         | 2.90.E+09            | 2.89.E+09            | 2.83.E+09            | 3.00.E+09            | 1.68.E+09            | 1.77.E+09            | 1.84.E+09            | 1.73.E+09            |
| 687 | P50552    | Vasodilator-stimulated phosphoprotein [OS=Homo sapiens]                                | 83.652        | 2.69.E+08         | 2.73.E+08         | 2.91.E+08         | 3.07.E+08         | 5.63.E+08            | 5.75.E+08            | 5.76.E+08            | 4.95.E+08            | 3.11.E+08            | 3.32.E+08            | 3.21.E+08            | 3.52.E+08            |
| 688 | Q14651    | Plastin-1 [OS=Homo sapiens]                                                            | 83.63         | 1.18.E+08         | 1.14.E+08         | 1.22.E+08         | 1.49.E+08         | 1.21.E+08            | 1.28.E+08            | 1.27.E+08            | 1.12.E+08            | 1.31.E+08            | 1.37.E+08            | 1.21.E+08            | 1.27.E+08            |
| 689 | P78347    | General transcription factor II-I [OS=Homo sapiens]                                    | 83.61         | 1.98.E+08         | 2.03.E+08         | 2.03.E+08         | 2.20.E+08         | 1.69.E+08            | 1.70.E+08            | 1.41.E+08            | 1.71.E+08            | 2.36.E+08            | 2.57.E+08            | 2.42.E+08            | 2.53.E+08            |
| 690 | P84098    | 60S ribosomal protein L19 [OS=Homo sapiens]                                            | 83.509        | 1.04.E+09         | 1.06.E+09         | 1.05.E+09         | 1.15.E+09         | 1.06.E+09            | 1.05.E+09            | 1.07.E+09            | 1.09.E+09            | 1.02.E+09            | 1.01.E+09            | 1.00.E+09            | 9.64.E+08            |
| 691 | Q14847    | LIM and SH3 domain protein 1 [OS=Homo sapiens]                                         | 83.38         | 2.55.E+08         | 3.08.E+08         | 3.05.E+08         | 2.19.E+08         | 5.68.E+08            | 5.75.E+08            | 5.74.E+08            | 5.82.E+08            | 5.94.E+08            | 5.56.E+08            | 5.68.E+08            | 5.49.E+08            |
| 692 | P05386    | 60S acidic ribosomal protein P1 [OS=Homo sapiens]                                      | 83.279        | 1.89.E+09         | 1.77.E+09         | 1.78.E+09         | 1.97.E+09         | 1.71.E+09            | 1.66.E+09            | 1.60.E+09            | 1.57.E+09            | 1.55.E+09            | 1.56.E+09            | 1.55.E+09            | 1.61.E+09            |
| 693 | Q8NBS9-1  | Thioredoxin domain-containing protein 5 [OS=Homo sapiens]                              | 83.187        | 6.46.E+08         | 5.46.E+08         | 5.38.E+08         | 6.82.E+08         | 6.72.E+08            | 6.73.E+08            | 6.46.E+08            | 5.70.E+08            | 6.27.E+08            | 5.41.E+08            | 5.38.E+08            | 5.58.E+08            |
| 694 | P49189    | 4-trimethylaminobutylaldehyde dehydrogenase [OS=Homo sapiens]                          | 83.157        | 4.30.E+08         | 4.21.E+08         | 3.98.E+08         | 4.12.E+08         | 3.83.E+08            | 3.93.E+08            | 3.89.E+08            | 4.01.E+08            | 5.63.E+08            | 5.32.E+08            | 5.40.E+08            | 5.17.E+08            |
| 695 | P62280    | 40S ribosomal protein S11 [OS=Homo sapiens]                                            | 82.795        | 2.87.E+09         | 2.95.E+09         | 3.11.E+09         | 3.06.E+09         | 3.00.E+09            | 3.15.E+09            | 3.06.E+09            | 3.19.E+09            | 2.54.E+09            | 2.68.E+09            | 2.76.E+09            | 2.58.E+09            |
| 696 | P09972    | Fructose-bisphosphate aldolase C [OS=Homo sapiens]                                     | 82.677        | 7.89.E+08         | 8.32.E+08         | 7.70.E+08         | 8.36.E+08         | 7.93.E+08            | 8.81.E+08            | 8.90.E+08            | 7.45.E+08            | 8.90.E+08            | 9.10.E+08            | 8.72.E+08            | 8.10.E+08            |
| 697 | P39019    | 40S ribosomal protein S19 [OS=Homo sapiens]                                            | 82.496        | 3.45.E+09         | 3.62.E+09         | 3.54.E+09         | 3.36.E+09         | 3.33.E+09            | 3.28.E+09            | 3.34.E+09            | 3.43.E+09            | 3.21.E+09            | 3.17.E+09            | 3.11.E+09            | 3.14.E+09            |
| 698 | Q96PK6-1  | RNA-binding protein 14 [OS=Homo sapiens]                                               | 82.46         | 6.93.E+08         | 7.28.E+08         | 7.28.E+08         | 7.16.E+08         | 4.84.E+08            | 5.06.E+08            | 6.46.E+08            | 6.45.E+08            | 5.30.E+08            | 7.77.E+08            | 7.68.E+08            | 5.45.E+08            |
| 699 | P61353    | 60S ribosomal protein L27 [OS=Homo sapiens]                                            | 82.263        | 2.73.E+09         | 2.78.E+09         | 2.76.E+09         | 2.61.E+09         | 2.63.E+09            | 2.55.E+09            | 2.52.E+09            | 2.68.E+09            | 2.57.E+09            | 2.48.E+09            | 2.48.E+09            | 2.50.E+09            |
| 700 | P62913    | 60S ribosomal protein L11 [OS=Homo sapiens]                                            | 81.888        | 2.08.E+09         | 2.08.E+09         | 1.90.E+09         | 1.92.E+09         | 2.02.E+09            | 2.00.E+09            | 2.08.E+09            | 2.18.E+09            | 2.26.E+09            | 2.15.E+09            | 2.13.E+09            | 2.06.E+09            |
| 701 | Q07021    | Complement component 1 Q subcomponent-binding protein, mitochondrial [OS=Homo sapiens] | 81.812        | 1.02.E+09         | 9.48.E+08         | 1.06.E+09         | 9.92.E+08         | 9.28.E+08            | 1.08.E+09            | 1.19.E+09            | 9.29.E+08            | 6.73.E+08            | 7.38.E+08            | 7.40.E+08            | 7.52.E+08            |
| 702 | Q15126    | phosphomevalonate kinase [OS=Homo sapiens]                                             | 81.798        | 4.22.E+08         | 4.11.E+08         | 4.25.E+08         | 4.33.E+08         | 4.02.E+08            | 4.05.E+08            | 3.97.E+08            | 4.13.E+08            | 4.11.E+08            | 4.38.E+08            | 4.09.E+08            | 4.18.E+08            |
| 703 | P62750    | 60S ribosomal protein L23a [OS=Homo sapiens]                                           | 81.284        | 1.22.E+09         | 1.25.E+09         | 1.34.E+09         | 1.27.E+09         | 1.22.E+09            | 1.25.E+09            | 1.31.E+09            | 1.31.E+09            | 1.21.E+09            | 1.26.E+09            | 1.24.E+09            | 1.23.E+09            |
| 704 | Q5JWF2-1  | Guanine nucleotide-binding protein G(S) subunit alpha isoforms XLas [OS=Homo sapiens]  | 81.084        | 2.63.E+08         | 2.86.E+08         | 2.52.E+08         | 2.58.E+08         | 3.42.E+08            | 3.46.E+08            | 3.51.E+08            | 3.26.E+08            | 2.84.E+08            | 2.74.E+08            | 2.69.E+08            | 2.59.E+08            |
| 705 | Q08257    | Quinone oxidoreductase [OS=Homo sapiens]                                               | 81.066        | 3.71.E+08         | 3.82.E+08         | 3.59.E+08         | 3.68.E+08         | 6.26.E+08            | 6.14.E+08            | 6.38.E+08            | 6.01.E+08            | 5.07.E+08            | 4.63.E+08            | 4.65.E+08            | 4.66.E+08            |
| 706 | P47813    | Eukaryotic translation initiation factor 1A, X-chromosomal [OS=Homo sapiens]           | 80.891        | 5.65.E+08         | 5.79.E+08         | 6.19.E+08         | 6.10.E+08         | 6.34.E+08            | 6.58.E+08            | 6.30.E+08            | 6.28.E+08            | 5.35.E+08            | 5.55.E+08            | 5.40.E+08            | 5.11.E+08            |
| 707 | P28066-1  | Proteasome subunit alpha type-5 [OS=Homo sapiens]                                      | 80.727        | 8.84.E+08         | 8.91.E+08         | 9.18.E+08         | 8.76.E+08         | 8.04.E+08            | 8.07.E+08            | 8.28.E+08            | 7.23.E+08            | 9.78.E+08            | 9.46.E+08            | 9.74.E+08            | 9.67.E+08            |
| 708 | O00425    | Insulin-like growth factor 2 mRNA-binding protein 3 [OS=Homo sapiens]                  | 80.672        | 2.21.E+08         | 2.88.E+08         | 2.34.E+08         | 3.18.E+08         | 2.49.E+08            | 2.11.E+08            | 2.14.E+08            | 1.94.E+08            | 2.69.E+08            | 2.81.E+08            | 3.35.E+08            | 2.58.E+08            |
| 709 | O14975    | very long-chain acyl-CoA synthetase [OS=Homo sapiens]                                  | 80.661        | 1.55.E+08         | 1.27.E+08         | 1.32.E+08         | 1.44.E+08         | 1.34.E+08            | 1.37.E+08            | 1.39.E+08            | 1.33.E+08            | 8.42.E+07            | 8.59.E+07            | 8.14.E+07            | 8.31.E+07            |
| 710 | P08397-1  | porphobilinogen deaminase [OS=Homo sapiens]                                            | 80.44         | 2.47.E+08         | 2.27.E+08         | 2.45.E+08         | 2.39.E+08         | 2.49.E+08            | 2.44.E+08            | 2.51.E+08            | 2.40.E+08            | 3.26.E+08            | 2.30.E+08            | 2.07.E+08            | 3.37.E+08            |
| 711 | Q15437    | protein transport protein Sec23B [OS=Homo sapiens]                                     | 80.395        | 2.85.E+08         | 2.54.E+08         | 2.57.E+08         | 2.56.E+08         | 2.47.E+08            | 2.67.E+08            | 2.53.E+08            | 2.34.E+08            | 2.57.E+08            | 2.57.E+08            | 2.50.E+08            | 2.73.E+08            |
| 712 | Q8IVT2    | Mitotic interactor and substrate of PLK1 [OS=Homo sapiens]                             | 80.37         | 4.10.E+08         | 4.26.E+08         | 4.26.E+08         | 4.22.E+08         | 4.80.E+08            | 4.87.E+08            | 4.59.E+08            | 4.69.E+08            | 4.18.E+08            | 4.54.E+08            | 4.13.E+08            | 3.97.E+08            |
| 713 | O15144    | Actin-related protein 2/3 complex subunit 2 [OS=Homo sapiens]                          | 80.262        | 4.52.E+08         | 4.43.E+08         | 4.29.E+08         | 4.20.E+08         | 5.26.E+08            | 5.38.E+08            | 5.09.E+08            | 5.38.E+08            | 5.29.E+08            | 4.90.E+08            | 5.05.E+08            | 5.05.E+08            |
| 714 | P51572    | B-cell receptor-associated protein 31 [OS=Homo sapiens]                                | 80.125        | 6.75.E+08         | 6.77.E+08         | 6.45.E+08         | 6.00.E+08         | 6.25.E+08            | 6.22.E+08            | 5.88.E+08            | 6.08.E+08            | 7.27.E+08            | 7.06.E+08            | 7.19.E+08            | 7.00.E+08            |
| 715 | Q92817    | Envoplakin [OS=Homo sapiens]                                                           | 79.618        | 1.68.E+08         | 2.60.E+08         | 2.76.E+08         | 2.54.E+08         | 2.17.E+08            | 1.85.E+08            | 1.90.E+08            | 2.01.E+08            | 2.31.E+08            | 2.43.E+08            | 2.44.E+08            | 2.22.E+08            |
| 716 | Q6NZI2-1  | caveolae-associated protein 1 [OS=Homo sapiens]                                        | 79.608        | 4.13.E+08         | 3.97.E+08         | 3.88.E+08         | 3.77.E+08         | 4.52.E+08            | 4.26.E+08            | 4.30.E+08            | 4.57.E+08            | 5.77.E+08            | 5.81.E+08            | 5.76.E+08            | 5.94.E+08            |
| 717 | Q14764    | major vault protein [OS=Homo sapiens]                                                  | 79.597        | 1.25.E+08         | 1.07.E+08         | 1.26.E+08         | 1.12.E+08         | 2.36.E+08            | 2.89.E+08            | 2.75.E+08            | 2.80.E+08            | 1.53.E+08            | 1.67.E+08            | 1.72.E+08            | 1.77.E+08            |
| 718 | O00625    | Pirin [OS=Homo sapiens]                                                                | 79.037        | 9.23.E+08         | 9.61.E+08         | 9.35.E+08         | 9.47.E+08         | 7.68.E+08            | 3.59.E+08            | 7.22.E+08            | 3.52.E+08            | 9.04.E+08            | 8.61.E+08            | 9.09.E+08            | 9.08.E+08            |
| 719 | P12830    | Cadherin-1 [OS=Homo sapiens]                                                           | 78.889        | 2.92.E+08         | 2.99.E+08         | 3.11.E+08         | 3.29.E+08         | 2.62.E+08            | 2.54.E+08            | 2.76.E+08            | 2.52.E+08            | 3.51.E+08            | 3.38.E+08            | 3.40.E+08            | 3.54.E+08            |
| 720 | Q96HC4    | PDZ and LIM domain protein 5 [OS=Homo sapiens]                                         | 78.844        | 3.40.E+08         | 3.11.E+08         | 3.20.E+08         | 3.13.E+08         | 3.86.E+08            | 4.00.E+08            | 4.49.E+08            | 4.46.E+08            | 3.97.E+08            | 4.40.E+08            | 4.51.E+08            | 5.06.E+08            |
| 721 | O00264    | Membrane-associated progesterone receptor component 1 [OS=Homo sapiens]                | 78.788        | 2.07.E+08         | 2.18.E+08         | 2.21.E+08         | 2.23.E+08         | 2.07.E+08            | 2.17.E+08            | 2.13.E+08            | 2.30.E+08            | 2.42.E+08            | 2.65.E+08            | 2.35.E+08            | 2.30.E+08            |
| 722 | P18754-1  | Regulator of chromosome condensation [OS=Homo sapiens]                                 | 78.771        | 3.73.E+08         | 3.42.E+08         | 3.87.E+08         | 3.40.E+08         | 2.88.E+08            | 2.81.E+08            | 2.90.E+08            | 2.87.E+08            | 3.74.E+08            | 3.74.E+08            | 3.80.E+08            | 3.98.E+08            |
| 723 | P35237    | serpin B6 [OS=Homo sapiens]                                                            | 78.41         | 1.87.E+08         | 2.01.E+08         | 2.14.E+08         | 2.02.E+08         | 2.62.E+08            | 2.65.E+08            | 2.66.E+08            | 2.64.E+08            | 2.46.E+08            | 2.44.E+08            | 2.47.E+08            | 2.52.E+08            |
| 724 | P26733-1  | 60S ribosomal protein L13 [OS=Homo sapiens]                                            | 78.252        | 3.01.E+09         | 3.10.E+09         | 3.05.E+09         | 3.01.E+09         | 2.84.E+09            | 2.78.E+09            | 2.87.E+09            | 2.91.E+09            | 2.85.E+09            | 2.77.E+09            | 2.75.E+09            | 2.64.E+09            |
| 725 | Q14739    | Lamin-B receptor [OS=Homo sapiens]                                                     | 78.185        | 4.26.E+08         | 5.95.E+08         | 6.35.E+08         | 6.43.E+08         | 6.78.E+08            | 7.00.E+08            | 6.97.E+08            | 6.80.E+08            | 6.16.E+08            | 6.25.E+08            | 6.64.E+08            | 6.63.E+08            |
| 726 | P47756-2  | Isoform 2 of F-actin-capping protein subunit beta [OS=Homo sapiens]                    | 78.101        | 4.62.E+08         | 4.85.E+08         | 4.67.E+08         | 4.73.E+08         | 5.01.E+08            | 5.26.E+08            | 4.95.E+08            | 5.30.E+08            | 5.91.E+08            | 5.90.E+08            | 5.98.E+08            | 5.38.E+08            |
| 727 | P62899    | 60S ribosomal protein L31 [OS=Homo sapiens]                                            | 78.087        | 1.10.E+09         | 1.10.E+09         | 1.06.E+09         | 1.22.E+09         | 1.08.E+09            | 1.07.E+09            | 1.09.E+09            | 1.02.E+09            | 1.04.E+09            | 9.30.E+08            | 1.03.E+09            | 1.06.E+09            |
| 728 | P40121    | Microphage-capping protein [OS=Homo sapiens]                                           | 78.033        | 2.22.E+08         | 2.23.E+08         | 2.22.E+08         | 2.27.E+08         | 3.57.E+08            | 3.71.E+08            | 3.80.E+08            | 3.79.E+08            | 5.03.E+08            | 4.47.E+08            | 4.62.E+08            | 4.78.E+08            |
| 729 | P10620    | Microsomal glutathione S-transferase 1 [OS=Homo sapiens]                               | 78.003        | 5.34.E+08         | 5.43.E+08         | 5.83.E+08         | 5.37.E+08         | 6.74.E+08            | 7.56.E+08            | 7.32.E+08            | 7.55.E+08            | 7.38.E+08            | 7.79.E+08            | 7.48.E+08            | 7.39.E+08            |
| 730 | Q9BXJ9    | N-alpha-acetyltransferase 15, NatA auxiliary subunit [OS=Homo sapiens]                 | 77.994        | 4.20.E+08         | 4.12.E+08         | 4.36.E+08         | 4.58.E+08         | 5.03.E+08            | 5.05.E+08            | 5.08.E+08            | 5.31.E+08            | 4.45.E+08            | 4.86.E+08            | 5.04.E+08            | 5.02.E+08            |
| 731 | P10768    | S-formylglutathione hydrolase [OS=Homo sapiens]                                        | 77.855        | 2.77.E+08         | 2.62.E+08         | 2.55.E+08         | 2.54.E+08         | 3.25.E+08            | 3.23.E+08            | 3.21.E+08            | 3.02.E+08            | 3.24.E+08            | 3.80.E+08            | 4.00.E+08            | 3.80.E+08            |
| 732 | Q9UBE0-1  | SUMO-activating enzyme subunit 1 [OS=Homo sapiens]                                     | 77.812        | 3.94.E+08         | 3.18.E+08         | 3.39.E+08         | 3.03.E+08         | 3.38.E+08            | 3.10.E+08            | 3.08.E+08            | 2.80.E+08            | 3.12.E+08            | 2.37.E+08            | 3.07.E+08            | 2.98.E+08            |
| 733 | O00303    | Eukaryotic translation initiation factor 3 subunit F [OS=Homo sapiens]                 | 77.731        | 4.21.E+08         | 4.04.E+08         | 4.15.E+08         | 4.34.E+08         | 4.04.E+08            | 3.91.E+08            | 4.04.E+08            | 3.87.E+08            | 4.09.E+08            | 4.43.E+08            | 3.91.E+08            | 4.88.E+08            |
| 734 | A0MZ66    | Shootin-1 [OS=Homo sapiens]                                                            | 77.707        | 1.85.E+08         | 2.00.E+08         | 2.04.E+08         | 2.00.E+08         | 1.67.E+08            | 1.77.E+08            | 1.79.E+08            | 1.81.E+08            | 1.95.E+08            | 1.81.E+08            | 1.78.E+08            | 1.99.E+08            |
| 735 | P28288    | ATP-binding cassette sub-family D member 3 [OS=Homo sapiens]                           | 77.693        | 1.43.E+08         | 1.47.E+08         | 1.47.E+08         | 1.64.E+08         | 1.73.E+08            | 1.72.E+08            | 1.68.E+08            | 1.58.E+08            | 1.82.E+08            | 1.85.E+08            | 1.82.E+08            | 1.87.E+08            |
| 736 | O75947-1  | ATP synthase subunit d, mitochondrial [OS=Homo sapiens]                                | 77.351        | 8.48.E+08         | 9.52.E+08         | 9.33.E+08         | 8.88.E+08         | 8.99.E+08            | 8.75.E+08            | 8.70.E+08            | 8.81.E+08            | 9.68.E+08            | 1.01.E+09            | 9.68.E+08            | 9.99.E+08            |
| 737 | P61604    | 10 kDa heat shock protein, mitochondrial [OS=Homo sapiens]                             | 77.316        | 4.09.E+09         | 4.12.E+09         | 4.27.E+09         | 4.30.E+09         | 3.89.E+09            | 3.86.E+09            | 3.99.E+09            | 3.98.E+09            | 4.21.E+09            | 4.39.E+09            | 4.54.E+09            | 4.70.E+09            |
| 738 | P17931    | Galectin-3 [OS=Homo sapiens]                                                           | 77.2          | 1.54.E+09         | 1.55.E+09         | 1.58.E+09         |                   |                      |                      |                      |                      |                      |                      |                      |                      |

| No. | Accession | Description                                                                             | Sum PEP Score | CTRL Abundances_1 | CTRL Abundances_2 | CTRL Abundances_3 | CTRL Abundances_4 | CLDN6-1 Abundances_1 | CLDN6-1 Abundances_2 | CLDN6-1 Abundances_3 | CLDN6-1 Abundances_4 | CLDN6-2 Abundances_1 | CLDN6-2 Abundances_2 | CLDN6-2 Abundances_3 | CLDN6-2 Abundances_4 |
|-----|-----------|-----------------------------------------------------------------------------------------|---------------|-------------------|-------------------|-------------------|-------------------|----------------------|----------------------|----------------------|----------------------|----------------------|----------------------|----------------------|----------------------|
| 739 | P36542-1  | ATP synthase subunit gamma, mitochondrial [OS=Homo sapiens]                             | 76.865        | 7.89.E+08         | 8.36.E+08         | 8.18.E+08         | 8.10.E+08         | 7.28.E+08            | 7.23.E+08            | 7.27.E+08            | 7.44.E+08            | 8.30.E+08            | 8.48.E+08            | 8.51.E+08            | 8.51.E+08            |
| 740 | Q01844    | RNA-binding protein EWS [OS=Homo sapiens]                                               | 76.848        | 3.23.E+08         | 3.33.E+08         | 3.22.E+08         | 3.36.E+08         | 3.28.E+08            | 3.20.E+08            | 3.00.E+08            | 3.22.E+08            | 3.66.E+08            | 3.57.E+08            | 3.39.E+08            | 3.45.E+08            |
| 741 | P30085-1  | UMP-CMP kinase [OS=Homo sapiens]                                                        | 76.845        | 4.01.E+08         | 3.96.E+08         | 3.65.E+08         | 4.29.E+08         | 4.69.E+08            | 4.83.E+08            | 4.86.E+08            | 4.35.E+08            | 4.35.E+08            | 4.18.E+08            | 4.37.E+08            | 4.38.E+08            |
| 742 | Q9BZZ5-2  | Isoform 2 of Apoptosis inhibitor 5 [OS=Homo sapiens]                                    | 76.687        | 2.61.E+08         | 2.53.E+08         | 2.40.E+08         | 2.73.E+08         | 2.24.E+08            | 2.29.E+08            | 2.35.E+08            | 2.36.E+08            | 2.60.E+08            | 2.53.E+08            | 2.48.E+08            | 2.43.E+08            |
| 743 | Q95994    | Anterior gradient protein 2 homolog [OS=Homo sapiens]                                   | 76.673        | 2.36.E+08         | 2.32.E+08         | 2.38.E+08         | 2.46.E+08         | 3.08.E+08            | 2.50.E+08            | 2.34.E+08            | 2.76.E+08            | 2.25.E+08            | 2.48.E+08            | 2.19.E+08            | 1.84.E+08            |
| 744 | Q16629    | serine/arginine-rich splicing factor 7 [OS=Homo sapiens]                                | 76.649        | 7.32.E+08         | 7.36.E+08         | 7.30.E+08         | 7.63.E+08         | 6.41.E+08            | 6.65.E+08            | 6.47.E+08            | 6.63.E+08            | 6.94.E+08            | 6.98.E+08            | 6.94.E+08            | 7.26.E+08            |
| 745 | Q8NE71-1  | ATP-binding cassette sub-family F member 1 [OS=Homo sapiens]                            | 76.618        | 2.03.E+08         | 1.79.E+08         | 1.70.E+08         | 2.26.E+08         | 2.52.E+08            | 2.13.E+08            | 2.02.E+08            | 1.99.E+08            | 2.55.E+08            | 2.65.E+08            | 2.36.E+08            | 2.48.E+08            |
| 746 | P52815    | 39S ribosomal protein L12, mitochondrial [OS=Homo sapiens]                              | 76.608        | 2.00.E+08         | 1.96.E+08         | 2.04.E+08         | 1.89.E+08         | 2.16.E+08            | 2.22.E+08            | 2.21.E+08            | 2.32.E+08            | 2.27.E+08            | 2.34.E+08            | 2.14.E+08            | 2.17.E+08            |
| 747 | P13693    | Translationally-controlled tumor protein [OS=Homo sapiens]                              | 76.59         | 5.82.E+08         | 4.86.E+08         | 5.67.E+08         | 5.63.E+08         | 6.32.E+08            | 6.17.E+08            | 6.16.E+08            | 6.11.E+08            | 7.86.E+08            | 7.24.E+08            | 7.26.E+08            | 7.50.E+08            |
| 748 | Q9Y285    | Phenylalanine--tRNA ligase alpha subunit [OS=Homo sapiens]                              | 76.059        | 3.93.E+08         | 3.91.E+08         | 3.42.E+08         | 3.61.E+08         | 3.54.E+08            | 3.17.E+08            | 3.22.E+08            | 3.00.E+08            | 4.00.E+08            | 3.76.E+08            | 3.62.E+08            | 3.70.E+08            |
| 749 | Q14978-1  | nucleolar and coiled-body phosphoprotein 1 [OS=Homo sapiens]                            | 75.987        | 2.30.E+08         | 2.27.E+08         | 2.33.E+08         | 2.16.E+08         | 2.14.E+08            | 1.99.E+08            | 1.85.E+08            | 2.04.E+08            | 1.69.E+08            | 1.65.E+08            | 1.95.E+08            | 1.91.E+08            |
| 750 | P33992    | DNA replication licensing factor mcm5 [OS=Homo sapiens]                                 | 75.986        | 5.64.E+08         | 6.12.E+08         | 6.01.E+08         | 5.79.E+08         | 6.32.E+08            | 5.96.E+08            | 6.44.E+08            | 6.12.E+08            | 6.72.E+08            | 6.52.E+08            | 5.88.E+08            | 6.72.E+08            |
| 751 | P26368    | Splicing factor U2AF 65 kDa subunit [OS=Homo sapiens]                                   | 75.931        | 3.78.E+08         | 3.28.E+08         | 3.92.E+08         | 3.93.E+08         | 2.91.E+08            | 4.38.E+08            | 4.33.E+08            | 4.32.E+08            | 2.73.E+08            | 2.58.E+08            | 2.86.E+08            | 3.04.E+08            |
| 752 | O14880    | Microsomal glutathione S-transferase 3 [OS=Homo sapiens]                                | 75.864        | 2.33.E+07         | 2.68.E+07         | 3.74.E+07         | 4.95.E+07         | 3.52.E+07            | 4.74.E+07            | 4.77.E+07            | 2.43.E+07            | 5.07.E+07            | 5.02.E+07            | 3.82.E+07            | 3.01.E+07            |
| 753 | P54819    | Adenylate kinase 2, mitochondrial [OS=Homo sapiens]                                     | 75.739        | 4.00.E+08         | 3.54.E+08         | 3.56.E+08         | 3.80.E+08         | 3.36.E+08            | 3.48.E+08            | 3.09.E+08            | 2.98.E+08            | 2.97.E+08            | 3.25.E+08            | 3.29.E+08            | 3.37.E+08            |
| 754 | Q15645    | Pachytene checkpoint protein 2 homolog [OS=Homo sapiens]                                | 75.518        | 2.25.E+08         | 1.96.E+08         | 2.30.E+08         | 2.21.E+08         | 1.97.E+08            | 1.93.E+08            | 1.96.E+08            | 2.04.E+08            | 2.18.E+08            | 2.28.E+08            | 2.23.E+08            | 2.12.E+08            |
| 755 | Q96199-1  | Succinate--CoA ligase [GDP-forming] subunit beta, mitochondrial [OS=Homo sapiens]       | 75.372        | 4.64.E+08         | 3.98.E+08         | 4.88.E+08         | 3.87.E+08         | 4.29.E+08            | 3.78.E+08            | 4.38.E+08            | 4.39.E+08            | 3.81.E+08            | 3.74.E+08            | 3.81.E+08            | 4.83.E+08            |
| 756 | Q15813    | Tubulin-specific chaperone E [OS=Homo sapiens]                                          | 75.312        | 2.16.E+08         | 1.73.E+08         | 2.02.E+08         | 1.94.E+08         | 1.68.E+08            | 1.98.E+08            | 2.02.E+08            | 1.93.E+08            | 1.99.E+08            | 1.55.E+08            | 1.66.E+08            | 2.10.E+08            |
| 757 | Q32MZ4-3  | Isoform 3 of Leucine-rich repeat flightless-interacting protein 1 [OS=Homo sapiens]     | 75.271        | 1.58.E+08         | 1.35.E+08         | 1.54.E+08         | 1.53.E+08         | 3.02.E+08            | 2.46.E+08            | 2.63.E+08            | 2.80.E+08            | 1.35.E+08            | 1.52.E+08            | 1.48.E+08            | 1.25.E+08            |
| 758 | Q13185    | chromobox protein homolog 3 [OS=Homo sapiens]                                           | 74.852        | 3.94.E+08         | 9.40.E+08         | 1.02.E+09         | 1.00.E+09         | 7.99.E+08            | 8.55.E+08            | 8.50.E+08            | 8.61.E+08            | 8.07.E+08            | 9.11.E+08            | 8.99.E+08            | 9.17.E+08            |
| 759 | O15143    | Actin-related protein 2/3 complex subunit 1B [OS=Homo sapiens]                          | 74.787        | 3.94.E+08         | 4.26.E+08         | 3.46.E+08         | 4.34.E+08         | 4.66.E+08            | 4.54.E+08            | 3.58.E+08            | 3.57.E+08            | 3.81.E+08            | 3.69.E+08            | 3.67.E+08            | 4.59.E+08            |
| 760 | P42224-1  | Signal transducer and activator of transcription 1-alpha/beta [OS=Homo sapiens]         | 74.74         | 1.64.E+08         | 1.70.E+08         | 1.82.E+08         | 1.68.E+08         | 2.33.E+08            | 2.28.E+08            | 2.35.E+08            | 2.29.E+08            | 2.36.E+08            | 2.30.E+08            | 2.25.E+08            | 2.47.E+08            |
| 761 | Q93052    | Lipoma-preferred partner [OS=Homo sapiens]                                              | 74.526        | 1.79.E+08         | 1.80.E+08         | 1.78.E+08         | 1.70.E+08         | 2.02.E+08            | 1.95.E+08            | 1.91.E+08            | 1.83.E+08            | 2.15.E+08            | 2.08.E+08            | 2.07.E+08            | 2.09.E+08            |
| 762 | P04792    | Heat shock protein beta-1 [OS=Homo sapiens]                                             | 74.44         | 8.67.E+07         | 8.72.E+07         | 6.70.E+07         | 8.84.E+07         | 1.18.E+08            | 1.13.E+08            | 1.11.E+08            | 1.09.E+08            | 3.39.E+08            | 3.57.E+08            | 3.36.E+08            | 3.29.E+08            |
| 763 | Q13155    | aminoacyl tRNA synthase complex-interacting multifunctional protein 2 [OS=Homo sapiens] | 74.273        | 5.43.E+08         | 4.19.E+08         | 5.27.E+08         | 5.64.E+08         | 4.10.E+08            | 4.47.E+08            | 4.51.E+08            | 4.28.E+08            | 4.66.E+08            | 4.31.E+08            | 3.85.E+08            | 3.65.E+08            |
| 764 | P61026    | ras-related protein rab-10 [OS=Homo sapiens]                                            | 74.02         | 4.47.E+08         | 5.41.E+08         | 5.81.E+08         | 7.21.E+08         | 6.10.E+08            | 6.51.E+08            | 6.27.E+08            | 5.97.E+08            | 5.48.E+08            | 6.18.E+08            | 5.43.E+08            | 5.11.E+08            |
| 765 | P16144-1  | Integrin beta-4 [OS=Homo sapiens]                                                       | 73.931        | 1.40.E+08         | 9.41.E+07         | 1.51.E+08         | 1.05.E+08         | 2.48.E+08            | 2.47.E+08            | 2.52.E+08            | 2.24.E+08            | 1.78.E+08            | 1.87.E+08            | 1.54.E+08            | 1.69.E+08            |
| 766 | O14744    | Protein arginine N-methyltransferase 5 [OS=Homo sapiens]                                | 73.878        | 2.78.E+08         | 2.38.E+08         | 2.58.E+08         | 2.21.E+08         | 2.42.E+08            | 1.92.E+08            | 2.10.E+08            | 2.02.E+08            | 2.62.E+08            | 2.23.E+08            | 2.83.E+08            | 2.74.E+08            |
| 767 | P63173    | 60S ribosomal protein l38 [OS=Homo sapiens]                                             | 73.874        | 1.80.E+09         | 1.74.E+09         | 1.80.E+09         | 1.61.E+09         | 1.60.E+09            | 1.55.E+09            | 1.63.E+09            | 1.75.E+09            | 1.52.E+09            | 1.54.E+09            | 1.57.E+09            | 1.44.E+09            |
| 768 | P61160-1  | Actin-related protein 2 [OS=Homo sapiens]                                               | 73.865        | 5.13.E+08         | 5.51.E+08         | 5.21.E+08         | 5.09.E+08         | 5.68.E+08            | 5.47.E+08            | 5.57.E+08            | 5.66.E+08            | 5.90.E+08            | 5.54.E+08            | 5.58.E+08            | 5.59.E+08            |
| 769 | O60739    | eukaryotic translation initiation factor 1b [OS=Homo sapiens]                           | 73.19         | 2.46.E+07         | 1.71.E+07         | 1.49.E+07         | 1.96.E+07         | 1.81.E+07            | 1.61.E+07            | 1.38.E+07            | 1.20.E+07            | 2.06.E+07            | 1.31.E+07            | 9.75.E+06            | 9.50.E+06            |
| 770 | P35268    | 60S ribosomal protein L22 [OS=Homo sapiens]                                             | 72.998        | 1.95.E+09         | 1.86.E+09         | 1.99.E+09         | 1.90.E+09         | 1.71.E+09            | 1.77.E+09            | 1.76.E+09            | 1.78.E+09            | 1.52.E+09            | 1.63.E+09            | 1.64.E+09            | 1.67.E+09            |
| 771 | Q01650    | large neutral amino acids transporter small subunit 1 [OS=Homo sapiens]                 | 72.809        | 4.85.E+08         | 4.82.E+08         | 5.20.E+08         | 4.85.E+08         | 4.67.E+08            | 4.81.E+08            | 4.93.E+08            | 5.15.E+08            | 3.06.E+08            | 3.03.E+08            | 3.32.E+08            | 2.87.E+08            |
| 772 | Q9Y2B0    | Protein canopy homolog 2 [OS=Homo sapiens]                                              | 72.693        | 4.85.E+08         | 4.88.E+08         | 4.97.E+08         | 4.76.E+08         | 4.39.E+08            | 4.51.E+08            | 4.38.E+08            | 4.57.E+08            | 4.86.E+08            | 5.05.E+08            | 5.13.E+08            | 5.16.E+08            |
| 773 | Q14498-1  | RNA-binding protein 39 [OS=Homo sapiens]                                                | 72.597        | 3.64.E+08         | 3.76.E+08         | 3.65.E+08         | 3.98.E+08         | 3.41.E+08            | 3.21.E+08            | 3.33.E+08            | 3.49.E+08            | 3.31.E+08            | 3.45.E+08            | 3.40.E+08            | 3.43.E+08            |
| 774 | P11498    | pyruvate carboxylase, mitochondrial [OS=Homo sapiens]                                   | 72.57         | 1.98.E+08         | 1.77.E+08         | 1.85.E+08         | 1.95.E+08         | 1.45.E+08            | 1.43.E+08            | 1.35.E+08            | 1.00.E+08            | 1.68.E+08            | 1.87.E+08            | 1.53.E+08            | 1.37.E+08            |
| 775 | Q6KB66    | Keratin, type II cytoskeletal 80 [OS=Homo sapiens]                                      | 72.423        | 1.73.E+08         | 2.16.E+08         | 2.07.E+08         | 1.95.E+08         | 1.54.E+08            | 1.53.E+08            | 1.56.E+08            | 1.46.E+08            | 2.02.E+08            | 1.91.E+08            | 1.67.E+08            | 1.91.E+08            |
| 776 | Q8TAT6-1  | Nuclear protein localization protein 4 homolog [OS=Homo sapiens]                        | 72.278        | 1.88.E+08         | 1.81.E+08         | 1.80.E+08         | 1.88.E+08         | 1.59.E+08            | 1.70.E+08            | 1.66.E+08            | 1.69.E+08            | 1.25.E+08            | 1.09.E+08            | 1.32.E+08            | 1.41.E+08            |
| 777 | P60866    | 40S ribosomal protein S20 [OS=Homo sapiens]                                             | 72.26         | 2.38.E+09         | 2.47.E+09         | 2.40.E+09         | 2.49.E+09         | 2.22.E+09            | 2.12.E+09            | 2.15.E+09            | 2.26.E+09            | 2.13.E+09            | 2.14.E+09            | 2.22.E+09            | 2.21.E+09            |
| 778 | Q9BYN0    | sulfiredoxin-1 [OS=Homo sapiens]                                                        | 72.15         | 9.11.E+08         | 8.50.E+08         | 8.24.E+08         | 8.87.E+08         | 7.85.E+08            | 7.54.E+08            | 7.45.E+08            | 7.32.E+08            | 4.98.E+08            | 5.03.E+08            | 4.90.E+08            | 4.94.E+08            |
| 779 | Q8TC12    | Retinol dehydrogenase 11 [OS=Homo sapiens]                                              | 72.056        | 2.98.E+08         | 3.08.E+08         | 3.12.E+08         | 3.25.E+08         | 2.84.E+08            | 2.64.E+08            | 2.11.E+08            | 2.96.E+08            | 2.54.E+08            | 3.68.E+08            | 3.41.E+08            | 3.48.E+08            |
| 780 | P61163    | Alpha-centractin [OS=Homo sapiens]                                                      | 71.918        | 3.06.E+08         | 3.13.E+08         | 3.01.E+08         | 2.98.E+08         | 3.58.E+08            | 4.04.E+08            | 3.40.E+08            | 3.42.E+08            | 3.54.E+08            | 3.43.E+08            | 3.47.E+08            | 3.62.E+08            |
| 781 | O75340    | programmed cell death protein 6 [OS=Homo sapiens]                                       | 71.438        | 7.82.E+08         | 7.76.E+08         | 7.44.E+08         | 7.67.E+08         | 7.16.E+08            | 6.78.E+08            | 7.26.E+08            | 7.00.E+08            | 7.98.E+08            | 7.82.E+08            | 7.88.E+08            | 7.87.E+08            |
| 782 | P46781    | 40S ribosomal protein S9 [OS=Homo sapiens]                                              | 70.953        | 5.37.E+09         | 5.69.E+09         | 5.63.E+09         | 5.56.E+09         | 5.46.E+09            | 5.40.E+09            | 5.44.E+09            | 5.64.E+09            | 5.10.E+09            | 5.10.E+09            | 5.16.E+09            | 5.07.E+09            |
| 783 | Q9H3K6-1  | bola-like protein 2 [OS=Homo sapiens]                                                   | 70.677        | 7.40.E+08         | 8.88.E+08         | 8.93.E+08         | 8.95.E+08         | 8.72.E+08            | 8.82.E+08            | 8.92.E+08            | 9.22.E+08            | 7.34.E+08            | 7.29.E+08            | 7.23.E+08            | 6.64.E+08            |
| 784 | Q96AG4    | Leucine-rich repeat-containing protein 59 [OS=Homo sapiens]                             | 70.593        | 6.91.E+08         | 6.48.E+08         | 6.61.E+08         | 5.95.E+08         | 6.73.E+08            | 6.17.E+08            | 6.34.E+08            | 6.47.E+08            | 6.79.E+08            | 6.21.E+08            | 6.86.E+08            | 7.17.E+08            |
| 785 | P78344-1  | Eukaryotic translation initiation factor 4 gamma 2 [OS=Homo sapiens]                    | 70.491        | 4.46.E+08         | 4.43.E+08         | 4.51.E+08         | 4.55.E+08         | 4.89.E+08            | 5.14.E+08            | 5.29.E+08            | 5.09.E+08            | 4.63.E+08            | 4.98.E+08            | 5.06.E+08            | 4.84.E+08            |
| 786 | O43684    | Mitotic checkpoint protein BUB3 [OS=Homo sapiens]                                       | 70.364        | 3.32.E+08         | 3.42.E+08         | 3.51.E+08         | 3.37.E+08         | 3.16.E+08            | 3.27.E+08            | 3.37.E+08            | 3.17.E+08            | 3.42.E+08            | 3.60.E+08            | 3.45.E+08            | 3.34.E+08            |
| 787 | O43852    | Calumenin [OS=Homo sapiens]                                                             | 70.04         | 5.23.E+08         | 5.25.E+08         | 5.36.E+08         | 5.26.E+08         | 6.29.E+08            | 6.24.E+08            | 6.02.E+08            | 5.95.E+08            | 6.36.E+08            | 6.41.E+08            | 7.28.E+08            | 6.91.E+08            |
| 788 | P61224-1  | Ras-related protein Rap-1b [OS=Homo sapiens]                                            | 69.984        | 4.73.E+08         | 3.88.E+08         | 4.11.E+08         | 4.68.E+08         | 5.04.E+08            | 5.24.E+08            | 5.03.E+08            | 4.52.E+08            | 5.13.E+08            | 4.75.E+08            | 5.24.E+08            | 4.99.E+08            |
| 789 | P08621-1  | U1 small nuclear ribonucleoprotein 70 kDa [OS=Homo sapiens]                             | 69.934        | 5.76.E+08         | 5.69.E+08         | 6.11.E+08         | 5.86.E+08         | 5.87.E+08            | 5.96.E+08            | 5.99.E+08            | 6.17.E+08            | 6.47.E+08            | 6.59.E+08            | 6.69.E+08            | 6.61.E+08            |
| 790 | P04181-1  | Ornithine aminotransferase, mitochondrial [OS=Homo sapiens]                             | 69.873        | 4.04.E+08         | 4.33.E+08         | 4.49.E+08         | 4.61.E+08         | 3.02.E+08            | 3.26.E+08            | 3.30.E+08            | 3.19.E+08            | 4.20.E+08            | 4.51.E+08            | 4.48.E+08            | 4.42.E+08            |
| 791 | Q9GZT3-1  | SRA stem-loop-interacting RNA-binding protein, mitochondrial [OS=Homo sapiens]          | 69.856        | 5.60.E+08         | 5.78.E+08         | 5.58.E+08         | 5.43.E+08         | 5.07.E+08            | 5.15.E+08            | 5.30.E+08            | 5.22.E+08            | 5.46.E+08            | 5.78.E+08            | 5.85.E+08            | 5.67.E+08            |
| 792 | Q15459    | splicing factor 3A subunit 1 [OS=Homo sapiens]                                          | 69.695        | 3.17.E+08         | 3.18.E+08         | 3.14.E+08         | 2.94.E+08         | 3.07.E+08            | 3.10.E+08            | 3.18.E+08            | 3.16.E+08            | 3.52.E+08            | 3.49.E+08            | 3.50.E+08            | 3.53.E+08            |
| 793 | P20073-1  | Annexin A7 [OS=Homo sapiens]                                                            | 69.631        | 6.22.E+08         | 6.58.E+08         | 6.26.E+08         | 6.03.E+08         | 5.87.E+08            | 5.54.E+08            | 5.87.E+08            | 5.49.E+08            | 6.41.E+08            | 6.59.E+08            | 6.79.E+08            | 6.75.E+08            |
| 794 | P49773    | Histidine triad nucleotide-binding protein 1 [OS=Homo sapiens]                          | 69.486        | 8.35.E+08         | 8.11.E+08         | 9.00.E+08         | 8.90.E+08         | 8.51.E+08            | 8.80.E+08            | 9.42.E+08            | 8.73.E+08            | 6.87.E+08            | 8.30.E+08            | 8.33.E+08            | 8.91.E+08            |
| 795 | P25788-1  | Proteasome subunit alpha type-3 [OS=Homo sapiens]                                       | 69.142        | 5.56.E+08         | 5.72.E+08         | 5.73.E+08         | 5.73.E+08         | 5.16.E+08            | 5.11.E+08            | 5.01.E+08            | 5.50.E+08            | 5.86.E+08            | 6.02.E+08            | 6.00.E+08            | 5.09.E+08            |

| No. | Accession | Description                                                                                         | Sum PEP<br>Score | CTRL<br>Abundances_1 | CTRL<br>Abundances_2 | CTRL<br>Abundances_3 | CTRL<br>Abundances_4 | CLDN6-1<br>Abundances_1 | CLDN6-1<br>Abundances_2 | CLDN6-1<br>Abundances_3 | CLDN6-1<br>Abundances_4 | CLDN6-2<br>Abundances_1 | CLDN6-2<br>Abundances_2 | CLDN6-2<br>Abundances_3 | CLDN6-2<br>Abundances_4 |
|-----|-----------|-----------------------------------------------------------------------------------------------------|------------------|----------------------|----------------------|----------------------|----------------------|-------------------------|-------------------------|-------------------------|-------------------------|-------------------------|-------------------------|-------------------------|-------------------------|
| 796 | P48444    | Coatamer subunit delta [OS=Homo sapiens]                                                            | 69.064           | 4.40.E+08            | 3.58.E+08            | 3.83.E+08            | 4.31.E+08            | 4.13.E+08               | 4.38.E+08               | 3.91.E+08               | 4.04.E+08               | 4.39.E+08               | 4.44.E+08               | 4.24.E+08               | 4.32.E+08               |
| 797 | Q7L1Q6-1  | Basic leucine zipper and W2 domain-containing protein 1 [OS=Homo sapiens]                           | 69.027           | 2.30.E+08            | 1.92.E+08            | 2.12.E+08            | 2.11.E+08            | 3.08.E+08               | 2.97.E+08               | 3.09.E+08               | 3.15.E+08               | 2.77.E+08               | 2.58.E+08               | 2.68.E+08               | 2.75.E+08               |
| 798 | P62266    | 40S ribosomal protein S23 [OS=Homo sapiens]                                                         | 69.023           | 7.14.E+08            | 7.17.E+08            | 7.68.E+08            | 8.32.E+08            | 8.62.E+08               | 8.62.E+08               | 8.86.E+08               | 8.61.E+08               | 7.03.E+08               | 6.85.E+08               | 6.71.E+08               | 6.88.E+08               |
| 799 | P61019-1  | Ras-related protein Rab-2A [OS=Homo sapiens]                                                        | 68.906           | 3.31.E+08            | 3.39.E+08            | 3.46.E+08            | 3.14.E+08            | 3.30.E+08               | 3.33.E+08               | 3.29.E+08               | 3.23.E+08               | 3.70.E+08               | 3.58.E+08               | 3.48.E+08               | 3.55.E+08               |
| 800 | Q8IZ83    | Aldehyde dehydrogenase family 16 member A1 [OS=Homo sapiens]                                        | 68.861           | 1.51.E+08            | 1.19.E+08            | 7.13.E+07            | 1.57.E+08            | 1.70.E+08               | 1.98.E+08               | 1.85.E+08               | 1.26.E+08               | 9.34.E+07               | 1.27.E+08               | 8.40.E+07               | 6.75.E+07               |
| 801 | P42766    | 60S ribosomal protein L35 [OS=Homo sapiens]                                                         | 68.665           | 1.38.E+09            | 1.52.E+09            | 1.48.E+09            | 1.54.E+09            | 1.35.E+09               | 1.35.E+09               | 1.37.E+09               | 1.38.E+09               | 1.33.E+09               | 1.38.E+09               | 1.35.E+09               | 1.31.E+09               |
| 802 | Q9UBQ0    | Vacuolar protein sorting-associated protein 29 [OS=Homo sapiens]                                    | 68.525           | 2.43.E+08            | 2.47.E+08            | 2.60.E+08            | 2.63.E+08            | 2.51.E+08               | 2.52.E+08               | 2.45.E+08               | 2.31.E+08               | 2.68.E+08               | 2.79.E+08               | 2.91.E+08               | 3.03.E+08               |
| 803 | P55735-1  | protein SEC13 homolog [OS=Homo sapiens]                                                             | 68.461           | 2.67.E+08            | 2.99.E+08            | 2.67.E+08            | 2.34.E+08            | 2.33.E+08               | 2.43.E+08               | 2.43.E+08               | 2.36.E+08               | 2.97.E+08               | 3.27.E+08               | 2.95.E+08               | 3.02.E+08               |
| 804 | Q9Y6E2    | Basic leucine zipper and W2 domain-containing protein 2 [OS=Homo sapiens]                           | 68.385           | 1.52.E+08            | 1.59.E+08            | 1.42.E+08            | 1.46.E+08            | 1.28.E+08               | 1.30.E+08               | 1.38.E+08               | 1.14.E+08               | 1.47.E+08               | 1.41.E+08               | 1.37.E+08               | 1.53.E+08               |
| 805 | O60832-1  | H/ACA ribonucleoprotein complex subunit 4 [OS=Homo sapiens]                                         | 68.365           | 2.17.E+08            | 2.18.E+08            | 2.08.E+08            | 2.58.E+08            | 1.62.E+08               | 1.94.E+08               | 2.20.E+08               | 2.22.E+08               | 2.46.E+08               | 2.39.E+08               | 2.47.E+08               | 2.46.E+08               |
| 806 | P23193    | Transcription elongation factor A protein 1 [OS=Homo sapiens]                                       | 68.089           | 1.99.E+08            | 1.90.E+08            | 2.01.E+08            | 1.89.E+08            | 2.17.E+08               | 2.15.E+08               | 1.91.E+08               | 2.13.E+08               | 1.45.E+08               | 1.47.E+08               | 1.50.E+08               | 1.32.E+08               |
| 807 | Q15631-1  | Translin [OS=Homo sapiens]                                                                          | 67.962           | 1.66.E+08            | 1.64.E+08            | 1.64.E+08            | 1.62.E+08            | 1.60.E+08               | 1.52.E+08               | 1.55.E+08               | 1.54.E+08               | 1.98.E+08               | 1.80.E+08               | 1.78.E+08               | 1.79.E+08               |
| 808 | Q03135    | Caveolin-1 [OS=Homo sapiens]                                                                        | 67.904           | 2.15.E+08            | 1.77.E+08            | 1.72.E+08            | 1.90.E+08            | 2.57.E+08               | 2.81.E+08               | 2.87.E+08               | 2.62.E+08               | 2.93.E+08               | 2.82.E+08               | 2.80.E+08               | 2.93.E+08               |
| 809 | P49821    | NADH dehydrogenase [ubiquinone] flavoprotein 1, mitochondrial [OS=Homo sapiens]                     | 67.677           | 1.67.E+08            | 1.73.E+08            | 1.87.E+08            | 1.65.E+08            | 1.49.E+08               | 1.66.E+08               | 1.73.E+08               | 1.65.E+08               | 1.65.E+08               | 1.61.E+08               | 1.73.E+08               | 1.69.E+08               |
| 810 | Q9Y6C9    | Mitochondrial carrier homolog 2 [OS=Homo sapiens]                                                   | 67.626           | 2.40.E+08            | 2.33.E+08            | 2.47.E+08            | 2.50.E+08            | 2.23.E+08               | 2.31.E+08               | 2.24.E+08               | 2.32.E+08               | 2.80.E+08               | 2.92.E+08               | 3.02.E+08               | 2.99.E+08               |
| 811 | Q9P2E9    | Ribosome-binding protein 1 OS=Homo sapiens OX=9606 GN=RRBP1 PE=1 SV=5                               | 67.562           | 9.37.E+07            | 1.03.E+08            | 1.14.E+08            | 9.31.E+07            | 8.47.E+07               | 8.14.E+07               | 1.09.E+08               | 1.22.E+08               | 8.49.E+07               | 1.30.E+08               | 1.20.E+08               | 9.54.E+07               |
| 812 | O60684    | Importin subunit alpha-7 [OS=Homo sapiens]                                                          | 67.424           | 5.61.E+07            | 4.06.E+07            | 3.72.E+07            | 5.17.E+07            | 3.43.E+07               | 4.66.E+07               | 3.57.E+07               | 3.30.E+07               | 5.06.E+07               | 5.06.E+07               | 4.50.E+07               | 3.71.E+07               |
| 813 | O94979    | Protein transport protein Sec31A [OS=Homo sapiens]                                                  | 67.422           | 3.74.E+08            | 4.11.E+08            | 3.95.E+08            | 4.29.E+08            | 4.18.E+08               | 4.05.E+08               | 3.93.E+08               | 4.14.E+08               | 4.55.E+08               | 5.27.E+08               | 4.73.E+08               | 4.74.E+08               |
| 814 | Q8VXF1    | Paraspeckle component 1 [OS=Homo sapiens]                                                           | 67.404           | 3.08.E+08            | 3.06.E+08            | 3.06.E+08            | 2.94.E+08            | 2.74.E+08               | 2.78.E+08               | 2.85.E+08               | 2.81.E+08               | 3.09.E+08               | 3.35.E+08               | 3.33.E+08               | 3.36.E+08               |
| 815 | Q13158    | FAS-associated death domain protein [OS=Homo sapiens]                                               | 67.287           | 7.69.E+07            | 6.22.E+07            | 6.47.E+07            | 5.35.E+07            | 6.58.E+07               | 6.28.E+07               | 6.73.E+07               | 6.35.E+07               | 5.81.E+07               | 5.85.E+07               | 5.29.E+07               | 5.14.E+07               |
| 816 | P52294    | Importin subunit alpha-5 [OS=Homo sapiens]                                                          | 67.229           | 1.64.E+08            | 1.63.E+08            | 1.49.E+08            | 1.65.E+08            | 1.56.E+08               | 1.51.E+08               | 1.72.E+08               | 1.39.E+08               | 1.68.E+08               | 1.57.E+08               | 1.79.E+08               | 1.66.E+08               |
| 817 | Q9Y5S2    | Serine/threonine-protein kinase MRCK beta [OS=Homo sapiens]                                         | 66.672           | 1.78.E+08            | 9.35.E+07            | 7.65.E+07            | 1.38.E+08            | 1.61.E+08               | 1.86.E+08               | 6.58.E+07               | 1.34.E+08               | 7.44.E+07               | 1.00.E+08               | 9.51.E+07               | 8.18.E+07               |
| 818 | Q8N8S7    | Protein enabled homolog [OS=Homo sapiens]                                                           | 66.229           | 2.28.E+08            | 2.18.E+08            | 2.42.E+08            | 2.38.E+08            | 2.47.E+08               | 2.53.E+08               | 2.60.E+08               | 2.53.E+08               | 2.86.E+08               | 3.19.E+08               | 3.21.E+08               | 3.10.E+08               |
| 819 | Q8WXX5    | dnaJ homolog subfamily C member 9 [OS=Homo sapiens]                                                 | 66.07            | 3.58.E+08            | 3.77.E+08            | 3.85.E+08            | 3.96.E+08            | 3.57.E+08               | 3.59.E+08               | 3.74.E+08               | 3.64.E+08               | 3.36.E+08               | 3.69.E+08               | 3.01.E+08               | 3.57.E+08               |
| 820 | P62910    | 60S ribosomal protein L32 [OS=Homo sapiens]                                                         | 65.735           | 1.39.E+09            | 1.41.E+09            | 1.36.E+09            | 1.51.E+09            | 1.39.E+09               | 1.36.E+09               | 1.33.E+09               | 1.39.E+09               | 1.25.E+09               | 1.23.E+09               | 1.19.E+09               | 1.21.E+09               |
| 821 | P69905    | Hemoglobin subunit alpha [OS=Homo sapiens]                                                          | 65.683           | 1.37.E+09            | 1.44.E+09            | 1.47.E+09            | 1.51.E+09            | 8.18.E+08               | 8.37.E+08               | 8.23.E+08               | 8.65.E+08               | 7.90.E+08               | 1.10.E+09               | 1.10.E+09               | 1.07.E+09               |
| 822 | Q9NZ01-1  | Very-long-chain enoyl-CoA reductase [OS=Homo sapiens]                                               | 65.569           | 4.44.E+08            | 4.69.E+08            | 4.67.E+08            | 5.05.E+08            | 4.49.E+08               | 4.35.E+08               | 4.55.E+08               | 4.89.E+08               | 5.08.E+08               | 5.31.E+08               | 5.35.E+08               | 5.26.E+08               |
| 823 | Q9Y3F4    | Serine-threonine kinase receptor-associated protein [OS=Homo sapiens]                               | 65.505           | 3.29.E+08            | 3.89.E+08            | 4.06.E+08            | 3.37.E+08            | 2.92.E+08               | 2.91.E+08               | 2.83.E+08               | 2.79.E+08               | 2.96.E+08               | 3.07.E+08               | 3.13.E+08               | 3.21.E+08               |
| 824 | P62314    | Small nuclear ribonucleoprotein Sm D1 [OS=Homo sapiens]                                             | 65.484           | 4.66.E+08            | 4.74.E+08            | 4.64.E+08            | 4.53.E+08            | 4.78.E+08               | 4.74.E+08               | 4.65.E+08               | 4.98.E+08               | 5.06.E+08               | 5.02.E+08               | 4.94.E+08               | 4.95.E+08               |
| 825 | P53999    | Activated RNA polymerase II transcriptional coactivator p15 [OS=Homo sapiens]                       | 65.466           | 6.29.E+08            | 5.95.E+08            | 6.39.E+08            | 6.13.E+08            | 6.14.E+08               | 6.39.E+08               | 6.30.E+08               | 6.27.E+08               | 6.35.E+08               | 7.00.E+08               | 6.45.E+08               | 6.81.E+08               |
| 826 | Q14257    | Reticulocalbin-2 [OS=Homo sapiens]                                                                  | 65.358           | 1.17.E+08            | 1.23.E+08            | 8.25.E+07            | 1.24.E+08            | 1.29.E+08               | 1.19.E+08               | 1.11.E+08               | 9.32.E+07               | 6.91.E+07               | 1.16.E+08               | 8.82.E+07               | 8.43.E+07               |
| 827 | P61106    | Ras-related protein Rab-14 [OS=Homo sapiens]                                                        | 65.06            | 2.95.E+08            | 3.09.E+08            | 2.90.E+08            | 3.16.E+08            | 3.01.E+08               | 2.95.E+08               | 3.11.E+08               | 2.98.E+08               | 3.31.E+08               | 3.26.E+08               | 3.07.E+08               | 3.24.E+08               |
| 828 | P61088    | ubiquitin-conjugating enzyme E2 N [OS=Homo sapiens]                                                 | 65.003           | 5.89.E+08            | 5.35.E+08            | 5.40.E+08            | 5.36.E+08            | 6.16.E+08               | 5.53.E+08               | 5.86.E+08               | 5.56.E+08               | 6.49.E+08               | 6.22.E+08               | 6.15.E+08               | 5.94.E+08               |
| 829 | Q9BXP5    | serrate RNA effector molecule homolog [OS=Homo sapiens]                                             | 64.604           | 2.24.E+08            | 2.38.E+08            | 2.09.E+08            | 2.51.E+08            | 2.12.E+08               | 1.72.E+08               | 1.94.E+08               | 1.88.E+08               | 1.81.E+08               | 1.39.E+08               | 1.69.E+08               | 1.56.E+08               |
| 830 | P51659-1  | peroxisomal multifunctional enzyme type 2 [OS=Homo sapiens]                                         | 64.601           | 1.96.E+08            | 2.35.E+08            | 2.17.E+08            | 2.37.E+08            | 1.83.E+08               | 1.66.E+08               | 1.66.E+08               | 1.77.E+08               | 2.02.E+08               | 2.22.E+08               | 1.99.E+08               | 2.26.E+08               |
| 831 | Q76003    | glutaredoxin-3 [OS=Homo sapiens]                                                                    | 64.315           | 3.50.E+08            | 3.33.E+08            | 3.15.E+08            | 3.03.E+08            | 2.97.E+08               | 3.01.E+08               | 2.77.E+08               | 2.95.E+08               | 3.42.E+08               | 3.11.E+08               | 3.13.E+08               | 3.10.E+08               |
| 832 | P23919    | thymidylate kinase [OS=Homo sapiens]                                                                | 64.278           | 6.18.E+08            | 6.66.E+08            | 6.75.E+08            | 6.20.E+08            | 6.48.E+08               | 6.55.E+08               | 6.50.E+08               | 6.87.E+08               | 7.15.E+08               | 7.33.E+08               | 7.25.E+08               | 6.23.E+08               |
| 833 | P63151    | Serine/threonine-protein phosphatase 2A 55 kDa regulatory subunit B alpha isoform [OS=Homo sapiens] | 64.217           | 3.48.E+08            | 3.52.E+08            | 3.56.E+08            | 3.61.E+08            | 3.63.E+08               | 4.05.E+08               | 4.03.E+08               | 4.04.E+08               | 2.73.E+08               | 3.72.E+08               | 2.84.E+08               | 3.72.E+08               |
| 834 | P49755    | Transmembrane emp24 domain-containing protein 10 [OS=Homo sapiens]                                  | 64.16            | 6.63.E+08            | 6.66.E+08            | 6.37.E+08            | 6.72.E+08            | 6.34.E+08               | 6.15.E+08               | 6.24.E+08               | 6.22.E+08               | 6.75.E+08               | 6.39.E+08               | 6.60.E+08               | 6.57.E+08               |
| 835 | Q13347    | Eukaryotic translation initiation factor 3 subunit I [OS=Homo sapiens]                              | 64.149           | 4.05.E+08            | 3.71.E+08            | 3.99.E+08            | 4.07.E+08            | 3.73.E+08               | 3.70.E+08               | 3.62.E+08               | 3.68.E+08               | 4.26.E+08               | 4.27.E+08               | 4.47.E+08               | 4.69.E+08               |
| 836 | P06737-1  | Glycogen phosphorylase, liver form [OS=Homo sapiens]                                                | 63.866           | 1.06.E+08            | 9.82.E+07            | 9.19.E+07            | 9.20.E+07            | 1.15.E+08               | 1.08.E+08               | 1.05.E+08               | 9.59.E+07               | 7.94.E+07               | 7.95.E+07               | 7.53.E+07               | 8.24.E+07               |
| 837 | Q75694    | nuclear pore complex protein nup155 [OS=Homo sapiens]                                               | 63.758           | 8.09.E+07            | 7.43.E+07            | 8.07.E+07            | 6.87.E+07            | 8.47.E+07               | 8.16.E+07               | 7.48.E+07               | 8.41.E+07               | 9.52.E+07               | 1.03.E+08               | 8.25.E+07               | 1.04.E+08               |
| 838 | Q96P70    | Importin-9 [OS=Homo sapiens]                                                                        | 63.731           | 4.59.E+07            | 5.83.E+07            | 5.52.E+07            | 3.60.E+07            | 7.64.E+07               | 6.86.E+07               | 6.53.E+07               | 4.27.E+07               | 7.45.E+07               | 6.98.E+07               | 6.38.E+07               | 6.23.E+07               |
| 839 | Q14137    | Ribosome biogenesis protein BOP1 [OS=Homo sapiens]                                                  | 63.588           | 3.80.E+07            | 3.89.E+07            | 4.20.E+07            | 7.45.E+07            | 8.78.E+07               | 1.12.E+08               | 1.09.E+08               | 3.93.E+07               | 4.16.E+07               | 4.91.E+07               | 4.15.E+07               | 3.45.E+07               |
| 840 | Q03252    | Lamin-B2 [OS=Homo sapiens]                                                                          | 63.322           | 2.24.E+08            | 2.43.E+08            | 2.60.E+08            | 2.45.E+08            | 2.36.E+08               | 2.44.E+08               | 2.48.E+08               | 2.45.E+08               | 2.80.E+08               | 3.00.E+08               | 3.03.E+08               | 2.95.E+08               |
| 841 | Q9NYF8-1  | Bcl-2-associated transcription factor 1 [OS=Homo sapiens]                                           | 63.224           | 2.38.E+08            | 3.09.E+08            | 3.08.E+08            | 2.87.E+08            | 2.83.E+08               | 2.86.E+08               | 2.78.E+08               | 2.86.E+08               | 2.63.E+08               | 2.46.E+08               | 2.75.E+08               | 2.38.E+08               |
| 842 | P30520    | adenylosuccinate synthetase isozyme 2 [OS=Homo sapiens]                                             | 63.043           | 3.04.E+08            | 3.13.E+08            | 2.30.E+08            | 3.36.E+08            | 2.03.E+08               | 3.25.E+08               | 2.42.E+08               | 2.38.E+08               | 3.46.E+08               | 3.37.E+08               | 3.21.E+08               | 3.16.E+08               |
| 843 | Q9Y316-1  | Protein MEMO1 [OS=Homo sapiens]                                                                     | 62.791           | 7.35.E+07            | 6.91.E+07            | 7.36.E+07            | 6.38.E+07            | 6.89.E+07               | 7.03.E+07               | 7.37.E+07               | 7.96.E+07               | 7.81.E+07               | 8.27.E+07               | 8.26.E+07               | 8.11.E+07               |
| 844 | Q43237    | Cytoplasmic dynein 1 light intermediate chain 2 [OS=Homo sapiens]                                   | 62.71            | 1.41.E+08            | 1.34.E+08            | 1.40.E+08            | 1.37.E+08            | 1.27.E+08               | 1.29.E+08               | 1.02.E+08               | 1.32.E+08               | 2.40.E+08               | 2.10.E+08               | 2.04.E+08               | 2.01.E+08               |
| 845 | P29966    | Myristoylated alanine-rich C-kinase substrate [OS=Homo sapiens]                                     | 62.647           | 6.74.E+07            | 8.08.E+07            | 9.34.E+07            | 8.77.E+07            | 2.27.E+08               | 2.24.E+08               | 2.21.E+08               | 2.38.E+08               | 1.55.E+08               | 1.44.E+08               | 1.57.E+08               | 1.47.E+08               |
| 846 | P30042-1  | ES1 protein homolog, mitochondrial [OS=Homo sapiens]                                                | 62.47            | 1.64.E+08            | 1.63.E+08            | 1.51.E+08            | 1.42.E+08            | 1.30.E+08               | 1.14.E+08               | 8.71.E+07               | 1.32.E+08               | 2.47.E+08               | 2.72.E+08               | 2.46.E+08               | 2.57.E+08               |
| 847 | PODMM9    | Sulfotransferase 1A3 [OS=Homo sapiens]                                                              | 62.405           | 4.00.E+08            | 3.89.E+08            | 3.96.E+08            | 4.08.E+08            | 4.21.E+08               | 4.20.E+08               | 4.00.E+08               | 4.08.E+08               | 6.04.E+08               | 5.88.E+08               | 6.04.E+08               | 6.37.E+08               |
| 848 | P39656    | Dolichyl-diphosphooligosaccharide--protein glycosyltransferase 48 kDa subunit [OS=Homo sapiens]     | 62.364           | 9.36.E+08            | 8.55.E+08            | 8.71.E+08            | 9.95.E+08            | 9.41.E+08               | 9.97.E+08               | 8.94.E+08               | 8.97.E+08               | 1.16.E+09               | 8.57.E+08               | 9.25.E+08               | 7.80.E+08               |

| No. | Accession | Description                                                                                   | Sum PEP Score | CTRL Abundances_1 | CTRL Abundances_2 | CTRL Abundances_3 | CTRL Abundances_4 | CLDN6-1 Abundances_1 | CLDN6-1 Abundances_2 | CLDN6-1 Abundances_3 | CLDN6-1 Abundances_4 | CLDN6-2 Abundances_1 | CLDN6-2 Abundances_2 | CLDN6-2 Abundances_3 | CLDN6-2 Abundances_4 |
|-----|-----------|-----------------------------------------------------------------------------------------------|---------------|-------------------|-------------------|-------------------|-------------------|----------------------|----------------------|----------------------|----------------------|----------------------|----------------------|----------------------|----------------------|
| 849 | Q16851    | UTP--glucose-1-phosphate uridylyltransferase [OS=Homo sapiens]                                | 62.313        | 1.63.E+08         | 1.26.E+08         | 9.94.E+07         | 1.18.E+08         | 2.06.E+08            | 1.83.E+08            | 1.90.E+08            | 2.23.E+08            | 2.05.E+08            | 1.22.E+08            | 2.05.E+08            | 1.94.E+08            |
| 850 | Q9UKY7    | Protein CDV3 homolog [OS=Homo sapiens]                                                        | 62.307        | 2.28.E+08         | 2.37.E+08         | 2.43.E+08         | 2.47.E+08         | 2.74.E+08            | 2.81.E+08            | 2.82.E+08            | 2.92.E+08            | 2.78.E+08            | 2.84.E+08            | 2.49.E+08            | 2.84.E+08            |
| 851 | P16949-1  | Stathmin [OS=Homo sapiens]                                                                    | 62.159        | 1.57.E+09         | 1.70.E+09         | 1.68.E+09         | 1.51.E+09         | 1.25.E+09            | 1.20.E+09            | 1.28.E+09            | 1.31.E+09            | 1.91.E+09            | 1.87.E+09            | 1.84.E+09            | 1.82.E+09            |
| 852 | Q8N1F7-1  | Nuclear pore complex protein Nup93 [OS=Homo sapiens]                                          | 62.078        | 1.05.E+08         | 9.77.E+07         | 1.01.E+08         | 1.11.E+08         | 1.03.E+08            | 1.02.E+08            | 9.91.E+07            | 9.20.E+07            | 1.28.E+08            | 1.41.E+08            | 1.41.E+08            | 1.51.E+08            |
| 853 | O43809    | Cleavage and polyadenylation specificity factor subunit 5 [OS=Homo sapiens]                   | 61.599        | 3.68.E+08         | 3.42.E+08         | 3.61.E+08         | 3.76.E+08         | 3.18.E+08            | 4.09.E+08            | 3.80.E+08            | 3.93.E+08            | 4.25.E+08            | 4.51.E+08            | 4.33.E+08            | 4.09.E+08            |
| 854 | Q9UBQ7    | Glyoxylate reductase/hydroxypyruvate reductase [OS=Homo sapiens]                              | 61.534        | 1.34.E+08         | 1.42.E+08         | 1.42.E+08         | 1.18.E+08         | 1.07.E+08            | 1.11.E+08            | 1.11.E+08            | 1.07.E+08            | 1.37.E+08            | 1.30.E+08            | 1.35.E+08            | 1.37.E+08            |
| 855 | P62834    | ras-related protein Rap-1A [OS=Homo sapiens]                                                  | 61.512        | 2.17.E+07         | 2.39.E+07         | 2.29.E+07         | 2.09.E+07         | 2.46.E+07            | 2.17.E+07            | 2.19.E+07            | 2.40.E+07            | 2.69.E+07            | 2.52.E+07            | 2.49.E+07            | 2.42.E+07            |
| 856 | O00429    | Dynamin-1-like protein [OS=Homo sapiens]                                                      | 61.474        | 6.95.E+07         | 5.29.E+07         | 5.14.E+07         | 7.09.E+07         | 6.28.E+07            | 6.29.E+07            | 7.40.E+07            | 4.51.E+07            | 6.38.E+07            | 4.52.E+07            | 5.56.E+07            | 5.42.E+07            |
| 857 | Q14376    | UDP-glucose 4-epimerase [OS=Homo sapiens]                                                     | 61.395        | 9.76.E+07         | 9.21.E+07         | 8.63.E+07         | 8.41.E+07         | 9.66.E+07            | 9.56.E+07            | 8.53.E+07            | 8.25.E+07            | 1.12.E+08            | 1.01.E+08            | 1.13.E+08            | 1.17.E+08            |
| 858 | Q15165-1  | Isoform 1 of Serum paraoxonase/arylesterase 2 [OS=Homo sapiens]                               | 61.349        | 4.29.E+08         | 4.27.E+08         | 4.25.E+08         | 4.21.E+08         | 3.64.E+08            | 3.65.E+08            | 3.47.E+08            | 3.48.E+08            | 5.90.E+08            | 5.70.E+08            | 6.12.E+08            | 5.99.E+08            |
| 859 | Q07666    | KH domain-containing, RNA-binding, signal transduction-associated protein 1 [OS=Homo sapiens] | 61.192        | 2.05.E+08         | 1.81.E+08         | 1.69.E+08         | 1.89.E+08         | 1.94.E+08            | 1.69.E+08            | 1.75.E+08            | 1.75.E+08            | 1.85.E+08            | 1.78.E+08            | 1.90.E+08            | 1.89.E+08            |
| 860 | Q14696    | LDLR chaperone MESD [OS=Homo sapiens]                                                         | 60.978        | 1.42.E+08         | 2.03.E+08         | 2.36.E+08         | 2.16.E+08         | 1.82.E+08            | 1.89.E+08            | 2.45.E+08            | 2.42.E+08            | 2.56.E+08            | 2.35.E+08            | 1.72.E+08            | 2.17.E+08            |
| 861 | O95757    | Heat shock 70 kDa protein 4L [OS=Homo sapiens]                                                | 60.919        | 2.78.E+08         | 3.07.E+08         | 3.08.E+08         | 2.98.E+08         | 3.10.E+08            | 2.98.E+08            | 2.35.E+08            | 3.08.E+08            | 2.67.E+08            | 2.90.E+08            | 2.74.E+08            | 2.90.E+08            |
| 862 | O95816    | BAG family molecular chaperone regulator 2 [OS=Homo sapiens]                                  | 60.767        | 2.03.E+08         | 1.52.E+08         | 1.66.E+08         | 1.64.E+08         | 1.30.E+08            | 1.23.E+08            | 1.25.E+08            | 1.34.E+08            | 1.61.E+08            | 1.05.E+08            | 1.55.E+08            | 1.51.E+08            |
| 863 | P30838    | Aldehyde dehydrogenase, dimeric NADP-prefering [OS=Homo sapiens]                              | 60.636        | 5.56.E+07         | 6.03.E+07         | 6.76.E+07         | 7.57.E+07         | 3.53.E+08            | 3.52.E+08            | 3.50.E+08            | 3.60.E+08            | 2.05.E+08            | 2.32.E+08            | 2.13.E+08            | 2.23.E+08            |
| 864 | Q9Y6B6    | GTP-binding protein SAR1b [OS=Homo sapiens]                                                   | 60.138        | 5.85.E+08         | 5.66.E+08         | 5.39.E+08         | 5.34.E+08         | 1.89.E+08            | 4.73.E+08            | 5.01.E+08            | 4.98.E+08            | 6.16.E+08            | 5.62.E+08            | 5.69.E+08            | 5.62.E+08            |
| 865 | P08779    | Keratin, type I cytoskeletal 16 [OS=Homo sapiens]                                             | 60.081        | 4.58.E+07         | 3.91.E+07         | 3.73.E+07         | 3.79.E+07         | 4.87.E+07            | 5.55.E+07            | 5.50.E+07            | 5.20.E+07            | 9.08.E+07            | 9.70.E+07            | 9.96.E+07            | 9.13.E+07            |
| 866 | P40429    | 60S ribosomal protein L13a [OS=Homo sapiens]                                                  | 60.031        | 1.97.E+09         | 2.11.E+09         | 2.23.E+09         | 2.16.E+09         | 2.02.E+09            | 1.92.E+09            | 2.03.E+09            | 2.09.E+09            | 1.89.E+09            | 2.01.E+09            | 2.06.E+09            | 1.84.E+09            |
| 867 | Q96F06    | Protein S100-A16 [OS=Homo sapiens]                                                            | 59.865        | 1.61.E+08         | 1.55.E+08         | 1.55.E+08         | 1.58.E+08         | 1.76.E+08            | 1.82.E+08            | 1.82.E+08            | 1.84.E+08            | 1.51.E+08            | 1.66.E+08            | 1.73.E+08            | 1.65.E+08            |
| 868 | P62633-1  | Cellular nucleic acid-binding protein [OS=Homo sapiens]                                       | 59.769        | 1.70.E+08         | 1.84.E+08         | 1.78.E+08         | 1.86.E+08         | 1.52.E+08            | 1.61.E+08            | 1.55.E+08            | 1.54.E+08            | 1.85.E+08            | 2.00.E+08            | 1.89.E+08            | 1.88.E+08            |
| 869 | P46459    | Vesicle-fusing ATPase [OS=Homo sapiens]                                                       | 59.682        | 2.55.E+08         | 2.31.E+08         | 2.23.E+08         | 2.68.E+08         | 2.45.E+08            | 2.55.E+08            | 2.64.E+08            | 2.68.E+08            | 3.22.E+08            | 3.17.E+08            | 2.92.E+08            | 2.81.E+08            |
| 870 | Q13148-1  | TAR DNA-binding protein 43 [OS=Homo sapiens]                                                  | 59.592        | 3.31.E+08         | 2.94.E+08         | 2.95.E+08         | 2.68.E+08         | 3.14.E+08            | 2.78.E+08            | 2.67.E+08            | 2.59.E+08            | 3.35.E+08            | 2.78.E+08            | 3.10.E+08            | 3.36.E+08            |
| 871 | Q14CN4-1  | Keratin, type II cytoskeletal 72 [OS=Homo sapiens]                                            | 59.552        | 2.53.E+07         | 2.81.E+07         | 2.94.E+07         | 3.05.E+07         | 1.73.E+07            | 2.12.E+07            | 2.03.E+07            | 1.97.E+07            | 1.78.E+07            | 2.67.E+07            | 2.14.E+07            | 2.18.E+07            |
| 872 | P38117    | electron transfer flavoprotein subunit beta [OS=Homo sapiens]                                 | 59.499        | 3.52.E+08         | 3.91.E+08         | 3.57.E+08         | 3.69.E+08         | 4.72.E+08            | 4.48.E+08            | 4.57.E+08            | 4.79.E+08            | 4.44.E+08            | 4.22.E+08            | 4.39.E+08            | 4.08.E+08            |
| 873 | Q9BWF3-1  | RNA-binding protein 4 [OS=Homo sapiens]                                                       | 59.478        | 1.03.E+08         | 9.85.E+07         | 8.90.E+07         | 1.06.E+08         | 7.26.E+07            | 9.04.E+07            | 1.04.E+08            | 9.36.E+07            | 1.22.E+08            | 1.19.E+08            | 1.15.E+08            | 1.14.E+08            |
| 874 | P23230    | cytidine deaminase [OS=Homo sapiens]                                                          | 59.407        | 6.55.E+07         | 6.92.E+07         | 5.71.E+07         | 6.25.E+07         | 8.40.E+07            | 8.50.E+07            | 8.46.E+07            | 7.17.E+07            | 1.50.E+08            | 1.55.E+08            | 1.51.E+08            | 1.52.E+08            |
| 875 | P48556    | 26S proteasome non-ATPase regulatory subunit 8 [OS=Homo sapiens]                              | 59.366        | 3.04.E+08         | 2.83.E+08         | 3.21.E+08         | 3.06.E+08         | 3.22.E+08            | 3.30.E+08            | 3.32.E+08            | 3.36.E+08            | 3.48.E+08            | 3.69.E+08            | 3.41.E+08            | 3.62.E+08            |
| 876 | Q99729-2  | Isoform 2 of Heterogeneous nuclear ribonucleoprotein A/B [OS=Homo sapiens]                    | 59.332        | 7.91.E+08         | 7.42.E+08         | 6.50.E+08         | 8.27.E+08         | 7.25.E+08            | 7.25.E+08            | 6.41.E+08            | 6.61.E+08            | 7.85.E+08            | 5.48.E+08            | 5.67.E+08            | 6.97.E+08            |
| 877 | O00116    | Alkylidihydroxyacetonephosphate synthase, peroxisomal [OS=Homo sapiens]                       | 59.256        | 1.65.E+08         | 1.47.E+08         | 1.67.E+08         | 1.88.E+08         | 1.49.E+08            | 1.81.E+08            | 1.63.E+08            | 1.65.E+08            | 1.98.E+08            | 1.71.E+08            | 1.73.E+08            | 1.63.E+08            |
| 878 | P09758    | Tumor-associated calcium signal transducer 2 [OS=Homo sapiens]                                | 59.183        | 3.67.E+08         | 3.80.E+08         | 3.79.E+08         | 3.98.E+08         | 3.34.E+08            | 3.37.E+08            | 3.27.E+08            | 3.81.E+08            | 2.22.E+08            | 2.90.E+08            | 2.82.E+08            | 2.68.E+08            |
| 879 | Q9NUU7    | ATP-dependent RNA helicase DDX19A [OS=Homo sapiens]                                           | 59.031        | 1.28.E+08         | 1.37.E+08         | 1.34.E+08         | 1.22.E+08         | 1.29.E+08            | 1.33.E+08            | 1.30.E+08            | 1.25.E+08            | 2.15.E+08            | 2.11.E+08            | 2.33.E+08            | 2.39.E+08            |
| 880 | Q9UHX1-1  | poly(U)-binding-splicing factor PUF60 [OS=Homo sapiens]                                       | 58.989        | 2.09.E+08         | 1.69.E+08         | 2.00.E+08         | 2.17.E+08         | 1.63.E+08            | 1.74.E+08            | 1.82.E+08            | 1.85.E+08            | 1.95.E+08            | 1.69.E+08            | 2.03.E+08            | 1.92.E+08            |
| 881 | Q9GZS3    | WD repeat-containing protein 61 [OS=Homo sapiens]                                             | 58.796        | 1.47.E+08         | 1.53.E+08         | 1.26.E+08         | 1.33.E+08         | 1.49.E+08            | 1.19.E+08            | 1.17.E+08            | 1.17.E+08            | 1.45.E+08            | 1.55.E+08            | 1.31.E+08            | 1.34.E+08            |
| 882 | P61619    | Protein transport protein Sec61 subunit alpha isoform 1 [OS=Homo sapiens]                     | 58.782        | 1.23.E+08         | 7.69.E+07         | 1.14.E+08         | 1.25.E+08         | 8.46.E+07            | 9.84.E+07            | 9.09.E+07            | 8.83.E+07            | 1.08.E+08            | 9.59.E+07            | 8.13.E+07            | 7.82.E+07            |
| 883 | Q8N163-1  | Cell cycle and apoptosis regulator protein 2 [OS=Homo sapiens]                                | 58.747        | 2.47.E+08         | 2.37.E+08         | 2.51.E+08         | 2.60.E+08         | 2.35.E+08            | 2.38.E+08            | 2.35.E+08            | 2.44.E+08            | 2.48.E+08            | 2.48.E+08            | 2.50.E+08            | 2.66.E+08            |
| 884 | P84243    | histone H3.3 [OS=Homo sapiens]                                                                | 58.72         | 5.23.E+08         | 3.94.E+08         | 4.25.E+08         | 3.89.E+08         | 5.33.E+08            | 5.38.E+08            | 4.84.E+08            | 4.45.E+08            | 4.49.E+08            | 4.08.E+08            | 3.96.E+08            | 3.20.E+08            |
| 885 | Q06323-1  | Proteasome activator complex subunit 1 [OS=Homo sapiens]                                      | 58.566        | 2.42.E+08         | 2.25.E+08         | 2.31.E+08         | 2.23.E+08         | 2.80.E+08            | 2.82.E+08            | 2.79.E+08            | 2.78.E+08            | 3.38.E+08            | 3.39.E+08            | 3.39.E+08            | 3.18.E+08            |
| 886 | P16070    | CD44 antigen [OS=Homo sapiens]                                                                | 58.535        | 6.41.E+08         | 6.64.E+08         | 6.34.E+08         | 5.70.E+08         | 1.13.E+09            | 1.10.E+09            | 1.10.E+09            | 1.12.E+09            | 1.13.E+09            | 1.05.E+09            | 1.05.E+09            | 1.01.E+09            |
| 887 | Q9Y559    | RNA-binding protein 8A [OS=Homo sapiens]                                                      | 58.325        | 2.57.E+08         | 2.72.E+08         | 2.76.E+08         | 2.62.E+08         | 2.47.E+08            | 2.70.E+08            | 2.66.E+08            | 2.49.E+08            | 2.36.E+08            | 2.60.E+08            | 2.51.E+08            | 2.36.E+08            |
| 888 | P48507    | Glutamate--cysteine ligase regulatory subunit [OS=Homo sapiens]                               | 58.157        | 3.36.E+08         | 3.50.E+08         | 3.64.E+08         | 3.59.E+08         | 2.96.E+08            | 3.09.E+08            | 3.26.E+08            | 3.16.E+08            | 2.63.E+08            | 2.73.E+08            | 2.80.E+08            | 2.77.E+08            |
| 889 | O00487    | 26S proteasome non-ATPase regulatory subunit 14 [OS=Homo sapiens]                             | 58.149        | 1.75.E+08         | 3.00.E+08         | 2.88.E+08         | 2.62.E+08         | 2.86.E+08            | 2.84.E+08            | 1.55.E+08            | 1.67.E+08            | 3.01.E+08            | 2.87.E+08            | 2.92.E+08            | 2.83.E+08            |
| 890 | Q12965    | unconventional myosin-le [OS=Homo sapiens]                                                    | 58.146        | 2.33.E+08         | 2.08.E+08         | 2.35.E+08         | 2.24.E+08         | 2.25.E+08            | 1.93.E+08            | 2.31.E+08            | 2.88.E+08            | 2.04.E+08            | 2.29.E+08            | 2.26.E+08            | 2.28.E+08            |
| 891 | P51648    | Fatty aldehyde dehydrogenase [OS=Homo sapiens]                                                | 58.032        | 4.40.E+08         | 4.06.E+08         | 3.86.E+08         | 3.54.E+08         | 5.47.E+08            | 5.81.E+08            | 5.72.E+08            | 5.94.E+08            | 4.33.E+08            | 4.16.E+08            | 3.80.E+08            | 3.80.E+08            |
| 892 | O75131    | Copine-3 [OS=Homo sapiens]                                                                    | 58.013        | 1.69.E+08         | 1.75.E+08         | 1.84.E+08         | 1.79.E+08         | 1.79.E+08            | 1.80.E+08            | 1.36.E+08            | 1.45.E+08            | 1.91.E+08            | 1.88.E+08            | 1.94.E+08            | 2.05.E+08            |
| 893 | P34896-1  | Serine hydroxymethyltransferase, cytosolic [OS=Homo sapiens]                                  | 57.97         | 1.67.E+08         | 1.87.E+08         | 1.47.E+07         | 9.77.E+07         | 3.84.E+07            | 1.97.E+07            | 4.22.E+07            | 2.18.E+07            | 8.55.E+06            | 9.79.E+06            | 7.96.E+07            | 8.23.E+06            |
| 894 | O00505    | Importin subunit alpha-4 [OS=Homo sapiens]                                                    | 57.849        | 1.03.E+08         | 7.01.E+07         | 5.86.E+07         | 9.60.E+07         | 7.22.E+07            | 8.14.E+07            | 8.60.E+07            | 7.22.E+07            | 9.15.E+07            | 8.14.E+07            | 7.38.E+07            | 7.47.E+07            |
| 895 | P00492    | Hypoxanthine-guanine phosphoribosyltransferase [OS=Homo sapiens]                              | 57.691        | 2.71.E+08         | 2.65.E+08         | 2.69.E+08         | 2.60.E+08         | 3.61.E+08            | 3.68.E+08            | 3.72.E+08            | 3.53.E+08            | 3.59.E+08            | 3.51.E+08            | 3.35.E+08            | 3.50.E+08            |
| 896 | Q9Y570    | Protein phosphatase methyltransferase 1 [OS=Homo sapiens]                                     | 57.685        | 1.87.E+08         | 1.62.E+08         | 1.60.E+08         | 1.73.E+08         | 1.85.E+08            | 1.68.E+08            | 1.76.E+08            | 1.81.E+08            | 2.13.E+08            | 2.16.E+08            | 2.17.E+08            | 2.23.E+08            |
| 897 | Q13724-1  | Mannosyl-oligosaccharide glucosidase [OS=Homo sapiens]                                        | 57.546        | 1.06.E+08         | 1.06.E+08         | 9.36.E+07         | 1.18.E+08         | 1.00.E+08            | 9.64.E+07            | 8.78.E+07            | 7.90.E+07            | 1.09.E+08            | 1.05.E+08            | 1.15.E+08            | 1.03.E+08            |
| 898 | Q14108-1  | Lysosome membrane protein 2 [OS=Homo sapiens]                                                 | 57.318        | 3.17.E+08         | 2.92.E+08         | 2.86.E+08         | 2.78.E+08         | 2.55.E+08            | 2.43.E+08            | 2.42.E+08            | 2.60.E+08            | 2.86.E+08            | 2.87.E+08            | 2.79.E+08            | 2.84.E+08            |
| 899 | P31689-1  | DnaJ homolog subfamily A member 1 [OS=Homo sapiens]                                           | 57.317        | 1.68.E+08         | 1.47.E+08         | 1.59.E+08         | 1.63.E+08         | 1.55.E+08            | 1.74.E+08            | 1.72.E+08            | 1.65.E+08            | 1.71.E+08            | 1.76.E+08            | 1.63.E+08            | 1.66.E+08            |
| 900 | Q9NS69    | Mitochondrial import receptor subunit TOM22 homolog [OS=Homo sapiens]                         | 57.139        | 1.59.E+08         | 1.31.E+08         | 1.77.E+08         | 1.93.E+08         | 1.56.E+08            | 1.88.E+08            | 1.88.E+08            | 1.77.E+08            | 1.67.E+08            | 1.55.E+08            | 1.34.E+08            | 6.70.E+07            |

| No. | Accession | Description                                                                                       | Sum PEP Score | CTRL Abundances_1 | CTRL Abundances_2 | CTRL Abundances_3 | CTRL Abundances_4 | CLDN6-1 Abundances_1 | CLDN6-1 Abundances_2 | CLDN6-1 Abundances_3 | CLDN6-1 Abundances_4 | CLDN6-2 Abundances_1 | CLDN6-2 Abundances_2 | CLDN6-2 Abundances_3 | CLDN6-2 Abundances_4 |
|-----|-----------|---------------------------------------------------------------------------------------------------|---------------|-------------------|-------------------|-------------------|-------------------|----------------------|----------------------|----------------------|----------------------|----------------------|----------------------|----------------------|----------------------|
| 901 | Q15907    | Ras-related protein Rab-11B [OS=Homo sapiens]                                                     | 57.073        | 1.14.E+09         | 1.19.E+09         | 1.26.E+09         | 1.23.E+09         | 1.22.E+09            | 1.28.E+09            | 1.25.E+09            | 1.28.E+09            | 1.34.E+09            | 1.44.E+09            | 1.44.E+09            | 1.44.E+09            |
| 902 | O75828    | Carbonyl reductase [NADPH] 3 [OS=Homo sapiens]                                                    | 57.038        | 3.47.E+07         | 6.37.E+07         | 4.20.E+07         | 3.65.E+07         | 9.35.E+07            | 1.07.E+08            | 9.57.E+07            | 1.02.E+08            | 2.11.E+07            | 3.59.E+07            | 3.37.E+07            | 3.74.E+07            |
| 903 | Q15637    | Splicing factor 1 [OS=Homo sapiens]                                                               | 56.991        | 2.47.E+08         | 2.49.E+08         | 2.58.E+08         | 2.53.E+08         | 2.49.E+08            | 2.31.E+08            | 2.30.E+08            | 2.27.E+08            | 2.33.E+08            | 2.38.E+08            | 2.58.E+08            | 2.51.E+08            |
| 904 | Q9UJS0    | Calcium-binding mitochondrial carrier protein Aralar2 [OS=Homo sapiens]                           | 56.946        | 1.81.E+08         | 1.67.E+08         | 1.78.E+08         | 1.80.E+08         | 1.46.E+08            | 1.24.E+08            | 1.17.E+08            | 1.19.E+08            | 1.84.E+08            | 1.37.E+08            | 1.69.E+08            | 1.75.E+08            |
| 905 | P68402-1  | platelet-activating factor acetylhydrolase IB subunit beta [OS=Homo sapiens]                      | 56.916        | 5.21.E+08         | 5.32.E+08         | 4.60.E+08         | 5.14.E+08         | 5.53.E+08            | 5.73.E+08            | 5.33.E+08            | 4.76.E+08            | 5.90.E+08            | 5.50.E+08            | 5.14.E+08            | 6.35.E+08            |
| 906 | P42765    | 3-ketoacyl-CoA thiolase, mitochondrial [OS=Homo sapiens]                                          | 56.884        | 1.36.E+08         | 1.37.E+08         | 1.43.E+08         | 1.48.E+08         | 1.83.E+08            | 2.01.E+08            | 1.89.E+08            | 1.95.E+08            | 1.57.E+08            | 1.68.E+08            | 1.74.E+08            | 1.58.E+08            |
| 907 | P62318    | small nuclear ribonucleoprotein sm d3 [OS=Homo sapiens]                                           | 56.875        | 8.39.E+08         | 8.88.E+08         | 7.29.E+08         | 7.88.E+08         | 7.96.E+08            | 8.26.E+08            | 6.96.E+08            | 6.97.E+08            | 8.64.E+08            | 8.15.E+08            | 7.34.E+08            | 9.51.E+08            |
| 908 | Q13362    | Serine/threonine-protein phosphatase 2A 56 kDa regulatory subunit gamma isoform [OS=Homo sapiens] | 56.787        | 2.13.E+08         | 2.06.E+08         | 1.80.E+08         | 2.09.E+08         | 2.00.E+08            | 2.03.E+08            | 1.81.E+08            | 2.02.E+08            | 2.02.E+08            | 1.95.E+08            | 1.82.E+08            | 2.04.E+08            |
| 909 | Q13620    | Cullin-4B [OS=Homo sapiens]                                                                       | 56.744        | 9.76.E+07         | 6.54.E+07         | 8.06.E+07         | 8.40.E+07         | 8.93.E+07            | 8.84.E+07            | 6.68.E+07            | 6.90.E+07            | 1.20.E+08            | 8.93.E+07            | 9.27.E+07            | 9.21.E+07            |
| 910 | Q9BUP3    | Oxidoreductase htaip2 [OS=Homo sapiens]                                                           | 56.722        | 2.47.E+08         | 2.42.E+08         | 2.43.E+08         | 2.16.E+08         | 2.35.E+08            | 2.31.E+08            | 2.57.E+08            | 1.52.E+08            | 2.91.E+08            | 3.41.E+08            | 3.26.E+08            | 3.51.E+08            |
| 911 | Q16543    | Hsp90 co-chaperone Cdc37 [OS=Homo sapiens]                                                        | 56.669        | 3.85.E+08         | 3.51.E+08         | 3.57.E+08         | 3.52.E+08         | 3.11.E+08            | 3.20.E+08            | 3.70.E+08            | 3.47.E+08            | 3.84.E+08            | 3.72.E+08            | 3.48.E+08            | 3.59.E+08            |
| 912 | Q9BV57    | 1,2-dihydroxy-3-keto-5-methylthiopentene dioxygenase [OS=Homo sapiens]                            | 56.654        | 4.00.E+08         | 4.22.E+08         | 4.16.E+08         | 4.12.E+08         | 3.76.E+08            | 3.90.E+08            | 3.25.E+08            | 3.89.E+08            | 4.42.E+08            | 4.59.E+08            | 4.58.E+08            | 4.69.E+08            |
| 913 | P43034    | Platelet-activating factor acetylhydrolase IB subunit alpha [OS=Homo sapiens]                     | 56.612        | 2.96.E+08         | 2.98.E+08         | 3.49.E+08         | 2.99.E+08         | 3.20.E+08            | 3.05.E+08            | 2.94.E+08            | 3.06.E+08            | 1.85.E+08            | 2.24.E+08            | 2.07.E+08            | 2.31.E+08            |
| 914 | P50995    | annexin A11 [OS=Homo sapiens]                                                                     | 56.524        | 4.50.E+08         | 4.92.E+08         | 4.80.E+08         | 3.55.E+08         | 3.94.E+08            | 3.89.E+08            | 3.99.E+08            | 4.18.E+08            | 2.39.E+08            | 3.36.E+08            | 3.44.E+08            | 3.43.E+08            |
| 915 | Q9H3P7    | Golgi resident protein GCP60 [OS=Homo sapiens]                                                    | 56.472        | 6.11.E+07         | 6.30.E+07         | 6.40.E+07         | 6.39.E+07         | 6.16.E+07            | 6.66.E+07            | 6.55.E+07            | 6.54.E+07            | 7.22.E+07            | 5.74.E+07            | 7.39.E+07            | 7.85.E+07            |
| 916 | P20340-2  | Isoform 2 of Ras-related protein Rab-6A [OS=Homo sapiens]                                         | 56.38         | 1.11.E+09         | 1.10.E+09         | 1.13.E+09         | 1.12.E+09         | 7.75.E+08            | 8.91.E+08            | 8.13.E+08            | 8.34.E+08            | 9.24.E+08            | 8.94.E+08            | 9.23.E+08            | 9.04.E+08            |
| 917 | Q15843    | NEDD8 [OS=Homo sapiens]                                                                           | 56.377        | 4.06.E+08         | 3.75.E+08         | 3.86.E+08         | 4.14.E+08         | 4.11.E+08            | 4.30.E+08            | 4.37.E+08            | 4.18.E+08            | 4.72.E+08            | 5.00.E+08            | 4.65.E+08            | 4.45.E+08            |
| 918 | Q9UKV3-1  | Apoptotic chromatin condensation inducer in the nucleus [OS=Homo sapiens]                         | 56.375        | 1.01.E+08         | 7.01.E+07         | 9.35.E+07         | 8.43.E+07         | 7.78.E+07            | 6.17.E+07            | 8.43.E+07            | 7.74.E+07            | 8.91.E+07            | 8.17.E+07            | 7.31.E+07            | 7.30.E+07            |
| 919 | Q9UDY4    | DnaJ homolog subfamily B member 4 [OS=Homo sapiens]                                               | 56.35         | 7.65.E+07         | 7.76.E+07         | 6.65.E+07         | 6.90.E+07         | 6.99.E+07            | 6.50.E+07            | 7.00.E+07            | 5.84.E+07            | 8.29.E+07            | 7.72.E+07            | 7.41.E+07            | 8.37.E+07            |
| 920 | O60936-2  | Nucleolar protein 3 [OS=Homo sapiens]                                                             | 56.247        | 1.30.E+08         | 1.22.E+08         | 1.30.E+08         | 1.17.E+08         | 1.13.E+08            | 1.09.E+08            | 1.13.E+08            | 1.12.E+08            | 2.02.E+08            | 1.96.E+08            | 1.88.E+08            | 1.85.E+08            |
| 921 | Q8WW11-3  | Isoform 3 of LIM domain only protein 7 [OS=Homo sapiens]                                          | 56.174        | 1.19.E+08         | 1.15.E+08         | 1.17.E+08         | 1.15.E+08         | 1.60.E+08            | 1.72.E+08            | 1.70.E+08            | 1.80.E+08            | 1.48.E+08            | 1.73.E+08            | 1.79.E+08            | 1.54.E+08            |
| 922 | Q9NQR4    | Omega-amidase NIT2 [OS=Homo sapiens]                                                              | 56.135        | 1.25.E+08         | 1.14.E+08         | 1.08.E+08         | 1.23.E+08         | 9.51.E+07            | 1.03.E+08            | 9.50.E+07            | 9.48.E+07            | 8.13.E+07            | 6.11.E+07            | 7.98.E+07            | 9.40.E+07            |
| 923 | Q96C86    | M7GpppX diphosphatase [OS=Homo sapiens]                                                           | 56.124        | 1.46.E+08         | 1.24.E+08         | 1.52.E+08         | 1.74.E+08         | 1.61.E+08            | 1.43.E+08            | 1.67.E+08            | 1.60.E+08            | 1.50.E+08            | 1.78.E+08            | 1.54.E+08            | 1.59.E+08            |
| 924 | P55769    | NHP2-like protein 1 [OS=Homo sapiens]                                                             | 56.11         | 3.87.E+08         | 3.74.E+08         | 4.14.E+08         | 3.97.E+08         | 2.86.E+08            | 3.17.E+08            | 3.20.E+08            | 3.17.E+08            | 3.43.E+08            | 3.92.E+08            | 3.76.E+08            | 3.97.E+08            |
| 925 | P46108-1  | Adapter molecule crk [OS=Homo sapiens]                                                            | 56.071        | 2.35.E+08         | 2.31.E+08         | 2.57.E+08         | 2.71.E+08         | 2.19.E+08            | 2.21.E+08            | 2.28.E+08            | 2.23.E+08            | 1.26.E+08            | 1.82.E+08            | 1.88.E+08            | 1.26.E+08            |
| 926 | Q9Y6N5    | Sulfide:quinone oxidoreductase, mitochondrial [OS=Homo sapiens]                                   | 55.989        | 2.16.E+08         | 1.87.E+08         | 2.30.E+08         | 1.83.E+08         | 2.85.E+08            | 2.59.E+08            | 2.96.E+08            | 2.90.E+08            | 2.95.E+08            | 3.15.E+08            | 3.22.E+08            | 3.12.E+08            |
| 927 | O94973    | AP-2 complex subunit alpha-2 [OS=Homo sapiens]                                                    | 55.899        | 1.96.E+08         | 1.85.E+08         | 1.88.E+08         | 2.02.E+08         | 2.09.E+08            | 2.04.E+08            | 2.09.E+08            | 2.05.E+08            | 2.24.E+08            | 2.26.E+08            | 2.19.E+08            | 2.27.E+08            |
| 928 | P23368-1  | NAD-dependent malic enzyme, mitochondrial [OS=Homo sapiens]                                       | 55.846        | 1.79.E+08         | 1.76.E+08         | 1.93.E+08         | 1.11.E+08         | 7.88.E+07            | 1.28.E+08            | 8.12.E+07            | 1.59.E+08            | 5.41.E+07            | 1.05.E+08            | 1.06.E+08            | 4.25.E+07            |
| 929 | P31350-1  | ribonucleoside-diphosphate reductase subunit M2 [OS=Homo sapiens]                                 | 55.821        | 1.51.E+08         | 1.42.E+08         | 1.49.E+08         | 1.55.E+08         | 1.53.E+08            | 1.48.E+08            | 1.43.E+08            | 1.54.E+08            | 1.31.E+08            | 1.19.E+08            | 1.26.E+08            | 1.25.E+08            |
| 930 | Q02750    | Dual specificity mitogen-activated protein kinase kinase 1 [OS=Homo sapiens]                      | 55.725        | 1.95.E+08         | 1.79.E+08         | 2.13.E+08         | 1.89.E+08         | 2.15.E+08            | 2.15.E+08            | 2.20.E+08            | 2.34.E+08            | 1.87.E+08            | 2.28.E+08            | 2.19.E+08            | 2.23.E+08            |
| 931 | P46937-1  | Transcriptional coactivator YAP1 [OS=Homo sapiens]                                                | 55.69         | 1.40.E+08         | 1.33.E+08         | 1.40.E+08         | 1.35.E+08         | 1.42.E+08            | 1.19.E+08            | 1.60.E+08            | 1.39.E+08            | 1.85.E+08            | 1.78.E+08            | 1.89.E+08            | 1.82.E+08            |
| 932 | P55957-1  | BH3-interacting domain death agonist [OS=Homo sapiens]                                            | 55.574        | 4.94.E+07         | 6.34.E+07         | 5.31.E+07         | 6.82.E+07         | 7.81.E+07            | 8.01.E+07            | 8.16.E+07            | 7.61.E+07            | 7.42.E+07            | 7.83.E+07            | 7.70.E+07            | 7.69.E+07            |
| 933 | P15170-3  | Isoform 3 of Eukaryotic peptide chain release factor GTP-binding subunit ERF3A [OS=Homo sapiens]  | 55.573        | 3.84.E+08         | 3.85.E+08         | 4.15.E+08         | 3.95.E+08         | 3.65.E+08            | 3.91.E+08            | 3.89.E+08            | 4.09.E+08            | 4.26.E+08            | 4.49.E+08            | 4.47.E+08            | 4.77.E+08            |
| 934 | P84103    | Serine/arginine-rich splicing factor 3 [OS=Homo sapiens]                                          | 55.568        | 1.34.E+09         | 1.33.E+09         | 1.35.E+09         | 1.33.E+09         | 1.09.E+09            | 1.16.E+09            | 1.17.E+09            | 1.17.E+09            | 1.30.E+09            | 1.29.E+09            | 1.25.E+09            | 1.36.E+09            |
| 935 | Q9H583    | HEAT repeat-containing protein 1 [OS=Homo sapiens]                                                | 55.558        | 1.45.E+08         | 1.46.E+08         | 1.50.E+08         | 1.42.E+08         | 1.32.E+08            | 1.27.E+08            | 1.17.E+08            | 8.72.E+07            | 1.45.E+08            | 1.44.E+08            | 1.46.E+08            | 1.48.E+08            |
| 936 | Q13895    | Bystin [OS=Homo sapiens]                                                                          | 55.547        | 2.19.E+08         | 2.10.E+08         | 2.05.E+08         | 2.35.E+08         | 1.90.E+08            | 1.87.E+08            | 1.90.E+08            | 1.80.E+08            | 1.52.E+08            | 1.55.E+08            | 1.54.E+08            | 1.62.E+08            |
| 937 | Q6P1M3-1  | Lethal(2) giant larvae protein homolog 2 [OS=Homo sapiens]                                        | 55.343        | 1.20.E+08         | 1.09.E+08         | 1.17.E+08         | 1.21.E+08         | 1.01.E+08            | 8.76.E+07            | 9.07.E+07            | 7.98.E+07            | 9.84.E+07            | 7.63.E+07            | 6.90.E+07            | 7.71.E+07            |
| 938 | Q8IY81    | pre-rRNA processing protein FTSJ3 [OS=Homo sapiens]                                               | 55.294        | 8.70.E+07         | 9.57.E+07         | 6.48.E+07         | 9.28.E+07         | 8.11.E+07            | 6.60.E+07            | 7.61.E+07            | 5.55.E+07            | 7.06.E+07            | 6.05.E+07            | 7.52.E+07            | 6.19.E+07            |
| 939 | P63000-1  | Ras-related C3 botulinum toxin substrate 1 [OS=Homo sapiens]                                      | 55.267        | 1.17.E+09         | 1.16.E+09         | 1.24.E+09         | 1.26.E+09         | 1.28.E+09            | 1.34.E+09            | 1.28.E+09            | 1.39.E+09            | 1.06.E+09            | 1.23.E+09            | 1.23.E+09            | 1.22.E+09            |
| 940 | P46060    | Ran GTPase-activating protein 1 [OS=Homo sapiens]                                                 | 55.219        | 1.02.E+08         | 1.03.E+08         | 1.31.E+08         | 1.39.E+08         | 1.25.E+08            | 1.53.E+08            | 8.01.E+07            | 7.98.E+07            | 1.64.E+08            | 1.66.E+08            | 1.61.E+08            | 1.67.E+08            |
| 941 | P14324    | Farnesyl pyrophosphate synthase [OS=Homo sapiens]                                                 | 55.157        | 2.92.E+08         | 2.82.E+08         | 2.87.E+08         | 2.77.E+08         | 2.57.E+08            | 2.63.E+08            | 2.73.E+08            | 2.65.E+08            | 2.67.E+08            | 2.43.E+08            | 2.58.E+08            | 2.56.E+08            |
| 942 | P04183    | Thymidine kinase, cytosolic [OS=Homo sapiens]                                                     | 55.134        | 1.13.E+08         | 1.20.E+08         | 1.25.E+08         | 1.21.E+08         | 1.20.E+08            | 1.32.E+08            | 1.42.E+08            | 1.24.E+08            | 8.44.E+07            | 9.29.E+07            | 8.65.E+07            | 8.44.E+07            |
| 943 | Q9NVP1    | ATP-dependent RNA helicase DDX18 [OS=Homo sapiens]                                                | 54.987        | 2.46.E+08         | 2.87.E+08         | 2.74.E+08         | 2.83.E+08         | 2.34.E+08            | 2.43.E+08            | 2.93.E+08            | 1.75.E+08            | 2.48.E+08            | 2.50.E+08            | 2.83.E+08            | 2.55.E+08            |
| 944 | O43396    | Thioredoxin-like protein 1 [OS=Homo sapiens]                                                      | 54.682        | 2.66.E+08         | 2.77.E+08         | 2.77.E+08         | 2.85.E+08         | 2.79.E+08            | 2.68.E+08            | 2.72.E+08            | 2.87.E+08            | 2.98.E+08            | 2.90.E+08            | 3.02.E+08            | 2.93.E+08            |
| 945 | Q9BQ52-1  | Zinc phosphodiesterase ELAC protein 2 [OS=Homo sapiens]                                           | 54.582        | 1.47.E+08         | 1.07.E+08         | 1.06.E+08         | 1.38.E+08         | 1.24.E+08            | 9.10.E+07            | 8.92.E+07            | 1.18.E+08            | 7.08.E+07            | 8.15.E+07            | 8.07.E+07            | 8.35.E+07            |
| 946 | P46778    | 60S ribosomal protein L21 [OS=Homo sapiens]                                                       | 54.478        | 1.56.E+09         | 1.52.E+09         | 1.45.E+09         | 1.30.E+09         | 1.38.E+09            | 1.29.E+09            | 1.29.E+09            | 1.37.E+09            | 1.33.E+09            | 1.23.E+09            | 1.28.E+09            | 1.22.E+09            |
| 947 | Q9Y5M8    | signal recognition particle receptor subunit beta [OS=Homo sapiens]                               | 54.423        | 6.47.E+07         | 7.29.E+07         | 7.67.E+07         | 7.08.E+07         | 6.41.E+07            | 7.94.E+07            | 7.61.E+07            | 7.67.E+07            | 7.90.E+07            | 7.38.E+07            | 7.25.E+07            | 7.43.E+07            |
| 948 | Q14019    | coactosin-like protein [OS=Homo sapiens]                                                          | 54.415        | 9.51.E+07         | 9.54.E+07         | 9.03.E+07         | 8.06.E+07         | 1.85.E+08            | 1.85.E+08            | 2.05.E+08            | 1.88.E+08            | 2.39.E+08            | 2.44.E+08            | 2.44.E+08            | 2.44.E+08            |
| 949 | Q9Y223-1  | bifunctional UDP-N-acetylglucosamine 2-epimerase/N-acetylmannosamine kinase [OS=Homo sapiens]     | 54.389        | 1.45.E+08         | 1.82.E+08         | 1.89.E+08         | 1.81.E+08         | 7.38.E+07            | 8.77.E+07            | 8.60.E+07            | 8.57.E+07            | 2.28.E+08            | 2.15.E+08            | 2.26.E+08            | 2.38.E+08            |
| 950 | Q01081    | Splicing factor U2AF 35 kDa subunit [OS=Homo sapiens]                                             | 54.331        | 2.82.E+08         | 2.61.E+08         | 2.55.E+08         | 2.54.E+08         | 2.57.E+08            | 2.48.E+08            | 2.54.E+08            | 2.22.E+08            | 2.42.E+08            | 2.41.E+08            | 2.30.E+08            | 2.36.E+08            |
| 951 | Q01130    | serine/arginine-rich splicing factor 2 [OS=Homo sapiens]                                          | 54.263        | 5.49.E+08         | 5.47.E+08         | 6.05.E+08         | 5.75.E+08         | 5.49.E+08            | 5.71.E+08            | 5.66.E+08            | 5.78.E+08            | 6.21.E+08            | 6.37.E+08            | 6.17.E+08            | 6.17.E+08            |
| 952 | Q9UHY7    | Enolase-phosphatase E1 [OS=Homo sapiens]                                                          | 54.202        | 1.86.E+08         | 1.81.E+08         | 1.78.E+08         | 1.85.E+08         | 1.58.E+08            | 1.63.E+08            | 1.50.E+08            | 1.41.E+08            | 1.66.E+08            | 1.46.E+08            | 1.42.E+08            | 1.77.E+08            |
| 953 | Q04837    | Single-stranded DNA-binding protein, mitochondrial [OS=Homo sapiens]                              | 54.187        | 2.65.E+08         | 2.58.E+08         | 2.48.E+08         | 1.89.E+08         | 2.44.E+08            | 2.41.E+08            | 2.36.E+08            | 2.38.E+08            | 2.94.E+08            | 3.43.E+08            | 3.00.E+08            | 2.87.E+08            |
| 954 | Q86UP2-1  | Kinectin [OS=Homo sapiens]                                                                        | 54.165        | 8.23.E+07         | 7.84.E+07         | 7.34.E+07         | 8.47.E+07         | 7.90.E+07            | 8.47.E+07            | 8.04.E+07            | 8.06.E+07            | 8.59.E+07            | 8.40.E+07            | 1.51.E+08            | 7.92.E+07            |

| No.  | Accession | Description                                                                                                                | Sum PEP Score | CTRL Abundances_1 | CTRL Abundances_2 | CTRL Abundances_3 | CTRL Abundances_4 | CLDN6-1 Abundances_1 | CLDN6-1 Abundances_2 | CLDN6-1 Abundances_3 | CLDN6-1 Abundances_4 | CLDN6-2 Abundances_1 | CLDN6-2 Abundances_2 | CLDN6-2 Abundances_3 | CLDN6-2 Abundances_4 |
|------|-----------|----------------------------------------------------------------------------------------------------------------------------|---------------|-------------------|-------------------|-------------------|-------------------|----------------------|----------------------|----------------------|----------------------|----------------------|----------------------|----------------------|----------------------|
| 955  | P09661    | U2 small nuclear ribonucleoprotein A' [OS=Homo sapiens]                                                                    | 53.941        | 2.54.E+08         | 2.35.E+08         | 2.62.E+08         | 2.57.E+08         | 2.47.E+08            | 2.42.E+08            | 2.64.E+08            | 2.67.E+08            | 2.73.E+08            | 2.90.E+08            | 2.83.E+08            | 2.82.E+08            |
| 956  | Q96KB5    | Lymphokine-activated killer T-cell-originated protein kinase [OS=Homo sapiens]                                             | 53.858        | 1.09.E+08         | 1.13.E+08         | 1.30.E+08         | 8.92.E+07         | 1.07.E+08            | 1.01.E+08            | 1.12.E+08            | 1.16.E+08            | 1.54.E+08            | 1.56.E+08            | 1.60.E+08            | 1.55.E+08            |
| 957  | Q9NYU2-1  | UDP-glucose:glycoprotein glucosyltransferase 1 [OS=Homo sapiens]                                                           | 53.825        | 8.08.E+07         | 7.14.E+07         | 8.36.E+07         | 7.45.E+07         | 7.05.E+07            | 7.56.E+07            | 7.60.E+07            | 6.68.E+07            | 5.37.E+07            | 6.15.E+07            | 5.98.E+07            | 6.39.E+07            |
| 958  | P51570    | galactokinase [OS=Homo sapiens]                                                                                            | 53.811        | 1.22.E+08         | 1.13.E+08         | 1.11.E+08         | 8.34.E+07         | 1.19.E+08            | 9.61.E+07            | 1.20.E+08            | 1.02.E+08            | 8.29.E+07            | 6.66.E+07            | 6.74.E+07            | 6.17.E+07            |
| 959  | Q13177    | Serine/threonine-protein kinase PAK 2 [OS=Homo sapiens]                                                                    | 53.81         | 1.43.E+08         | 1.53.E+08         | 1.39.E+08         | 1.38.E+08         | 1.90.E+08            | 1.90.E+08            | 1.97.E+08            | 2.04.E+08            | 2.28.E+08            | 2.17.E+08            | 2.02.E+08            | 2.17.E+08            |
| 960  | O60841    | Eukaryotic translation initiation factor 5B [OS=Homo sapiens]                                                              | 53.524        | 2.13.E+08         | 9.92.E+07         | 1.01.E+08         | 1.01.E+08         | 9.68.E+07            | 1.01.E+08            | 9.00.E+07            | 8.28.E+07            | 2.22.E+08            | 1.04.E+08            | 1.02.E+08            | 9.85.E+07            |
| 961  | Q8NB7-1   | Sulfatase-modifying factor 2 [OS=Homo sapiens]                                                                             | 53.495        | 2.57.E+08         | 2.65.E+08         | 2.34.E+08         | 2.29.E+08         | 2.43.E+08            | 1.82.E+08            | 1.81.E+08            | 1.92.E+08            | 2.17.E+08            | 1.97.E+08            | 1.38.E+08            | 1.95.E+08            |
| 962  | Q9BPW8    | Protein NipSnap homolog 1 [OS=Homo sapiens]                                                                                | 53.465        | 3.70.E+08         | 3.31.E+08         | 3.37.E+08         | 3.09.E+08         | 2.85.E+08            | 2.61.E+08            | 2.87.E+08            | 2.51.E+08            | 4.14.E+08            | 4.14.E+08            | 4.14.E+08            | 4.08.E+08            |
| 963  | P61201-1  | COP9 signalosome complex subunit 2 [OS=Homo sapiens]                                                                       | 53.269        | 1.93.E+08         | 1.43.E+08         | 1.58.E+08         | 1.04.E+08         | 1.75.E+08            | 1.07.E+08            | 1.14.E+08            | 1.01.E+08            | 1.70.E+08            | 9.73.E+07            | 1.37.E+08            | 1.13.E+08            |
| 964  | P38606    | V-type proton ATPase catalytic subunit A [OS=Homo sapiens]                                                                 | 53.183        | 1.01.E+08         | 6.21.E+07         | 1.20.E+08         | 6.86.E+07         | 1.18.E+08            | 9.79.E+07            | 1.16.E+08            | 1.02.E+08            | 1.14.E+08            | 1.44.E+08            | 1.29.E+08            | 6.48.E+07            |
| 965  | O75352    | Mannose-P-dolichol utilization defect 1 protein [OS=Homo sapiens]                                                          | 53.161        | 2.29.E+08         | 2.26.E+08         | 2.25.E+08         | 2.45.E+08         | 2.53.E+08            | 2.51.E+08            | 2.62.E+08            | 2.64.E+08            | 2.04.E+08            | 2.08.E+08            | 2.19.E+08            | 2.22.E+08            |
| 966  | P83731    | 60S ribosomal protein L24 [OS=Homo sapiens]                                                                                | 53.143        | 2.01.E+09         | 2.09.E+09         | 2.06.E+09         | 1.97.E+09         | 1.88.E+09            | 1.86.E+09            | 1.88.E+09            | 1.89.E+09            | 1.93.E+09            | 1.84.E+09            | 1.87.E+09            | 1.81.E+09            |
| 967  | O95361-1  | Tripartite motif-containing protein 16 [OS=Homo sapiens]                                                                   | 53.118        | 1.40.E+08         | 1.30.E+08         | 1.30.E+08         | 1.66.E+08         | 1.73.E+08            | 1.70.E+08            | 2.44.E+08            | 2.42.E+08            | 1.13.E+08            | 9.86.E+07            | 1.02.E+08            | 8.26.E+07            |
| 968  | Q07157    | Tight junction protein ZO-1 [OS=Homo sapiens]                                                                              | 53.081        | 9.39.E+07         | 9.35.E+07         | 1.05.E+08         | 9.19.E+07         | 1.21.E+08            | 1.23.E+08            | 1.28.E+08            | 1.22.E+08            | 9.90.E+07            | 1.06.E+08            | 9.55.E+07            | 9.32.E+07            |
| 969  | P50570-1  | Dynamin-2 [OS=Homo sapiens]                                                                                                | 52.922        | 1.55.E+08         | 9.92.E+07         | 9.55.E+07         | 1.06.E+08         | 1.34.E+08            | 9.97.E+07            | 1.09.E+08            | 6.54.E+07            | 1.35.E+08            | 8.49.E+07            | 1.33.E+08            | 1.21.E+08            |
| 970  | P62854    | 40S ribosomal protein S26 [OS=Homo sapiens]                                                                                | 52.833        | 1.32.E+09         | 1.34.E+09         | 1.33.E+09         | 1.44.E+09         | 1.30.E+09            | 1.22.E+09            | 1.25.E+09            | 1.30.E+09            | 1.18.E+09            | 1.22.E+09            | 1.24.E+09            | 1.24.E+09            |
| 971  | P42126    | Enoyl-CoA delta isomerase 1, mitochondrial [OS=Homo sapiens]                                                               | 52.766        | 4.91.E+08         | 4.28.E+08         | 4.51.E+08         | 4.14.E+08         | 4.05.E+08            | 4.02.E+08            | 3.99.E+08            | 3.34.E+08            | 3.61.E+08            | 3.56.E+08            | 3.65.E+08            | 3.68.E+08            |
| 972  | P61916    | Epididymal secretory protein E1 [OS=Homo sapiens]                                                                          | 52.764        | 3.94.E+08         | 3.71.E+08         | 3.78.E+08         | 3.89.E+08         | 4.15.E+08            | 4.12.E+08            | 3.99.E+08            | 3.94.E+08            | 6.39.E+08            | 6.00.E+08            | 6.53.E+08            | 6.34.E+08            |
| 973  | P49023    | Paxillin [OS=Homo sapiens]                                                                                                 | 52.763        | 6.69.E+07         | 6.25.E+07         | 6.41.E+07         | 6.36.E+07         | 8.58.E+07            | 9.07.E+07            | 8.50.E+07            | 8.26.E+07            | 8.49.E+07            | 8.85.E+07            | 9.10.E+07            | 9.09.E+07            |
| 974  | Q15008    | 26S proteasome non-ATPase regulatory subunit 6 [OS=Homo sapiens]                                                           | 52.625        | 2.93.E+08         | 3.39.E+08         | 3.07.E+08         | 3.24.E+08         | 3.56.E+08            | 3.18.E+08            | 2.29.E+08            | 3.47.E+08            | 4.01.E+08            | 3.72.E+08            | 3.77.E+08            | 3.23.E+08            |
| 975  | P06730    | Eukaryotic translation initiation factor 4E [OS=Homo sapiens]                                                              | 52.623        | 6.67.E+08         | 7.10.E+08         | 7.21.E+08         | 6.48.E+08         | 6.37.E+08            | 6.43.E+08            | 6.51.E+08            | 6.57.E+08            | 7.44.E+08            | 7.68.E+08            | 7.51.E+08            | 7.07.E+08            |
| 976  | O43598-1  | 2'-deoxynucleoside 5'-phosphate N-hydrolase 1 [OS=Homo sapiens]                                                            | 52.542        | 6.01.E+08         | 5.42.E+08         | 5.41.E+08         | 4.51.E+08         | 4.74.E+08            | 4.33.E+08            | 4.38.E+08            | 4.82.E+08            | 6.18.E+08            | 5.37.E+08            | 5.44.E+08            | 5.82.E+08            |
| 977  | P53004    | Biliverdin reductase A [OS=Homo sapiens]                                                                                   | 52.495        | 1.41.E+08         | 1.42.E+08         | 1.63.E+08         | 1.28.E+08         | 2.06.E+08            | 1.99.E+08            | 2.10.E+08            | 1.83.E+08            | 1.99.E+08            | 1.91.E+08            | 1.83.E+08            | 1.89.E+08            |
| 978  | Q9UNF0    | Protein kinase C and casein kinase substrate in neurons protein 2 [OS=Homo sapiens]                                        | 52.452        | 3.40.E+08         | 3.36.E+08         | 3.60.E+08         | 3.35.E+08         | 3.17.E+08            | 3.12.E+08            | 2.99.E+08            | 3.13.E+08            | 3.12.E+08            | 3.19.E+08            | 3.21.E+08            | 3.08.E+08            |
| 979  | P06396    | Gelsolin [OS=Homo sapiens]                                                                                                 | 52.447        | 9.57.E+07         | 1.04.E+08         | 9.29.E+07         | 1.11.E+08         | 1.14.E+08            | 1.23.E+08            | 1.60.E+08            | 1.21.E+08            | 1.94.E+08            | 1.82.E+08            | 1.70.E+08            | 1.93.E+08            |
| 980  | P50914    | 60S ribosomal protein L14 [OS=Homo sapiens]                                                                                | 52.186        | 2.34.E+09         | 2.48.E+09         | 2.65.E+09         | 2.60.E+09         | 2.31.E+09            | 2.35.E+09            | 2.33.E+09            | 2.39.E+09            | 2.01.E+09            | 2.39.E+09            | 2.43.E+09            | 2.43.E+09            |
| 981  | Q8N6T3-1  | ADP-ribosylation factor GTPase-activating protein 1 [OS=Homo sapiens]                                                      | 52.15         | 8.33.E+07         | 1.10.E+08         | 1.51.E+08         | 9.75.E+07         | 8.80.E+07            | 9.06.E+07            | 9.08.E+07            | 9.28.E+07            | 1.41.E+08            | 1.39.E+08            | 1.30.E+08            | 1.35.E+08            |
| 982  | P63167    | Dynein light chain 1, cytoplasmic [OS=Homo sapiens]                                                                        | 51.982        | 6.89.E+08         | 7.10.E+08         | 6.41.E+08         | 5.58.E+08         | 6.59.E+08            | 6.16.E+08            | 6.06.E+08            | 6.06.E+08            | 7.31.E+08            | 6.57.E+08            | 6.76.E+08            | 7.17.E+08            |
| 983  | Q5JPE7    | NODAL modulator 2 [OS=Homo sapiens]                                                                                        | 51.924        | 8.90.E+07         | 7.24.E+07         | 6.56.E+07         | 8.24.E+07         | 6.85.E+07            | 4.74.E+07            | 6.96.E+07            | 6.81.E+07            | 7.75.E+07            | 8.56.E+07            | 8.22.E+07            | 7.97.E+07            |
| 984  | Q5VYK3    | Proteasome-associated protein ECM29 homolog [OS=Homo sapiens]                                                              | 51.901        | 8.30.E+07         | 7.82.E+07         | 8.35.E+07         | 7.37.E+07         | 8.09.E+07            | 8.44.E+07            | 1.02.E+08            | 8.89.E+07            | 9.03.E+07            | 8.96.E+07            | 9.36.E+07            | 8.29.E+07            |
| 985  | P10515    | Dihydrolipoyllysine-residue acetyltransferase component of pyruvate dehydrogenase complex, mitochondrial [OS=Homo sapiens] | 51.883        | 1.24.E+08         | 1.24.E+08         | 1.27.E+08         | 1.38.E+08         | 1.13.E+08            | 1.17.E+08            | 1.18.E+08            | 1.29.E+08            | 1.17.E+08            | 1.19.E+08            | 1.14.E+08            | 1.08.E+08            |
| 986  | P63172    | Dynein light chain Tctex-type 1 [OS=Homo sapiens]                                                                          | 51.855        | 8.75.E+07         | 8.15.E+07         | 9.82.E+07         | 1.08.E+08         | 8.92.E+07            | 1.09.E+08            | 1.06.E+08            | 1.01.E+08            | 1.01.E+08            | 1.06.E+08            | 1.04.E+08            | 1.03.E+08            |
| 987  | P49915    | GMP synthase [glutamine-hydrolyzing] [OS=Homo sapiens]                                                                     | 51.797        | 1.64.E+08         | 1.37.E+08         | 1.48.E+08         | 1.34.E+08         | 1.49.E+08            | 1.16.E+08            | 1.32.E+08            | 1.75.E+08            | 1.20.E+08            | 1.23.E+08            | 1.25.E+08            | 1.31.E+08            |
| 988  | O60888-1  | Protein CutA [OS=Homo sapiens]                                                                                             | 51.69         | 3.28.E+08         | 2.70.E+08         | 2.75.E+08         | 2.94.E+08         | 3.36.E+08            | 3.24.E+08            | 3.33.E+08            | 2.54.E+08            | 3.53.E+08            | 3.52.E+08            | 3.39.E+08            | 3.55.E+08            |
| 989  | P04899-1  | guanine nucleotide-binding protein G(i) subunit alpha-2 [OS=Homo sapiens]                                                  | 51.682        | 6.36.E+07         | 7.62.E+07         | 6.58.E+07         | 7.20.E+07         | 1.04.E+08            | 9.66.E+07            | 9.99.E+07            | 1.04.E+08            | 8.20.E+07            | 8.44.E+07            | 9.19.E+07            | 7.09.E+07            |
| 990  | O43169    | Cytochrome b5 type B [OS=Homo sapiens]                                                                                     | 51.625        | 2.05.E+08         | 1.96.E+08         | 1.95.E+08         | 1.91.E+08         | 1.74.E+08            | 1.54.E+08            | 1.59.E+08            | 1.60.E+08            | 2.39.E+08            | 2.80.E+08            | 2.74.E+08            | 2.68.E+08            |
| 991  | P62942    | Peptidyl-prolyl cis-trans isomerase FKBP1A [OS=Homo sapiens]                                                               | 51.307        | 3.83.E+08         | 4.12.E+08         | 3.97.E+08         | 4.15.E+08         | 4.36.E+08            | 4.60.E+08            | 4.42.E+08            | 4.59.E+08            | 4.78.E+08            | 5.43.E+08            | 5.30.E+08            | 5.11.E+08            |
| 992  | Q9BZQ8    | Protein Niban [OS=Homo sapiens]                                                                                            | 51.226        | 1.76.E+08         | 1.65.E+08         | 1.80.E+08         | 1.72.E+08         | 2.19.E+08            | 1.97.E+08            | 2.27.E+08            | 2.22.E+08            | 2.05.E+07            | 2.88.E+07            | 2.55.E+07            | 1.44.E+07            |
| 993  | P28331-1  | NADH-ubiquinone oxidoreductase 75 kDa subunit, mitochondrial [OS=Homo sapiens]                                             | 51.219        | 7.98.E+07         | 7.14.E+07         | 8.15.E+07         | 5.82.E+07         | 5.12.E+07            | 6.14.E+07            | 4.95.E+07            | 5.53.E+07            | 6.23.E+07            | 8.75.E+07            | 8.54.E+07            | 1.00.E+08            |
| 994  | Q8WUF5    | RelA-associated inhibitor [OS=Homo sapiens]                                                                                | 51.157        | 1.01.E+08         | 1.09.E+08         | 1.06.E+08         | 1.04.E+08         | 1.17.E+08            | 1.48.E+08            | 1.44.E+08            | 1.54.E+08            | 8.20.E+07            | 9.25.E+07            | 9.15.E+07            | 9.08.E+07            |
| 995  | P25685    | dnaJ homolog subfamily B member 1 [OS=Homo sapiens]                                                                        | 51.086        | 2.49.E+08         | 2.45.E+08         | 2.25.E+08         | 2.25.E+08         | 2.54.E+08            | 2.54.E+08            | 2.58.E+08            | 2.40.E+08            | 2.21.E+08            | 1.99.E+08            | 2.37.E+08            | 2.23.E+08            |
| 996  | Q14116    | Interleukin-18 [OS=Homo sapiens]                                                                                           | 51.017        | 2.54.E+08         | 2.37.E+08         | 2.36.E+08         | 2.60.E+08         | 3.82.E+08            | 3.86.E+08            | 3.82.E+08            | 3.70.E+08            | 4.07.E+08            | 4.32.E+08            | 4.15.E+08            | 4.27.E+08            |
| 997  | Q6GMV3    | Putative peptidyl-tRNA hydrolase PTRHD1 [OS=Homo sapiens]                                                                  | 50.955        | 1.10.E+08         | 6.48.E+07         | 8.36.E+07         | 6.98.E+07         | 7.45.E+07            | 5.60.E+07            | 6.02.E+07            | 5.82.E+07            | 1.19.E+08            | 9.88.E+07            | 9.41.E+07            | 1.14.E+08            |
| 998  | Q9H910-1  | Jupiter microtubule associated homolog 2 [OS=Homo sapiens]                                                                 | 50.925        | 2.87.E+08         | 2.95.E+08         | 3.00.E+08         | 2.82.E+08         | 2.02.E+08            | 2.08.E+08            | 1.80.E+08            | 2.16.E+08            | 2.66.E+08            | 3.56.E+08            | 3.84.E+08            | 3.45.E+08            |
| 999  | P52306-1  | Rap1 GTPase-GDP dissociation stimulator 1 [OS=Homo sapiens]                                                                | 50.921        | 4.35.E+07         | 3.70.E+07         | 3.86.E+07         | 3.61.E+07         | 3.90.E+07            | 4.63.E+07            | 4.72.E+07            | 4.40.E+07            | 4.69.E+07            | 5.00.E+07            | 4.98.E+07            | 4.63.E+07            |
| 1000 | O75116    | Rho-associated protein kinase 2 [OS=Homo sapiens]                                                                          | 50.876        | 1.60.E+08         | 1.47.E+08         | 1.58.E+08         | 1.66.E+08         | 1.26.E+08            | 1.34.E+08            | 1.32.E+08            | 1.27.E+08            | 1.66.E+08            | 1.64.E+08            | 1.75.E+08            | 1.89.E+08            |
| 1001 | O15173    | Membrane-associated progesterone receptor component 2 [OS=Homo sapiens]                                                    | 50.74         | 2.99.E+08         | 3.06.E+08         | 3.21.E+08         | 3.24.E+08         | 2.71.E+08            | 2.85.E+08            | 2.81.E+08            | 2.82.E+08            | 3.46.E+08            | 3.54.E+08            | 3.57.E+08            | 3.45.E+08            |
| 1002 | Q9Y383    | Putative RNA-binding protein Luc7-like 2 [OS=Homo sapiens]                                                                 | 50.721        | 2.05.E+08         | 2.08.E+08         | 1.95.E+08         | 2.51.E+08         | 2.08.E+08            | 2.56.E+08            | 1.79.E+08            | 2.57.E+08            | 2.05.E+08            | 2.72.E+08            | 2.24.E+08            | 2.69.E+08            |
| 1003 | Q9NSE4    | Isoleucine--tRNA ligase, mitochondrial [OS=Homo sapiens]                                                                   | 50.707        | 1.42.E+08         | 1.45.E+08         | 1.65.E+08         | 1.56.E+08         | 1.31.E+08            | 1.33.E+08            | 1.29.E+08            | 1.38.E+08            | 1.45.E+08            | 1.24.E+08            | 1.42.E+08            | 1.53.E+08            |
| 1004 | P00403    | Cytochrome c oxidase subunit 2 [OS=Homo sapiens]                                                                           | 50.7          | 4.61.E+08         | 4.36.E+08         | 4.57.E+08         | 4.57.E+08         | 4.47.E+08            | 4.40.E+08            | 4.57.E+08            | 4.16.E+08            | 3.59.E+08            | 3.27.E+08            | 3.52.E+08            | 3.65.E+08            |
| 1005 | P62995    | transformer-2 protein homolog beta [OS=Homo sapiens]                                                                       | 50.693        | 2.85.E+08         | 2.72.E+08         | 2.76.E+08         | 2.87.E+08         | 2.77.E+08            | 2.89.E+08            | 2.84.E+08            | 2.75.E+08            | 2.77.E+08            | 2.86.E+08            | 2.88.E+08            | 2.79.E+08            |

| No.  | Accession | Description                                                                                  | Sum PEP Score | CTRL Abundances_1 | CTRL Abundances_2 | CTRL Abundances_3 | CTRL Abundances_4 | CLDN6-1 Abundances_1 | CLDN6-1 Abundances_2 | CLDN6-1 Abundances_3 | CLDN6-1 Abundances_4 | CLDN6-2 Abundances_1 | CLDN6-2 Abundances_2 | CLDN6-2 Abundances_3 | CLDN6-2 Abundances_4 |
|------|-----------|----------------------------------------------------------------------------------------------|---------------|-------------------|-------------------|-------------------|-------------------|----------------------|----------------------|----------------------|----------------------|----------------------|----------------------|----------------------|----------------------|
| 1006 | Q9UQB8    | Brain-specific angiogenesis inhibitor 1-associated protein 2 [OS=Homo sapiens]               | 50.654        | 1.53.E+08         | 1.25.E+08         | 1.43.E+08         | 1.62.E+08         | 1.61.E+08            | 1.51.E+08            | 1.63.E+08            | 1.34.E+08            | 1.22.E+08            | 1.43.E+08            | 1.57.E+08            | 1.55.E+08            |
| 1007 | P23229-1  | integrin alpha-6 [OS=Homo sapiens]                                                           | 50.634        | 6.57.E+07         | 5.44.E+07         | 4.99.E+07         | 5.41.E+07         | 1.69.E+08            | 2.05.E+08            | 1.63.E+08            | 1.62.E+08            | 1.03.E+08            | 7.96.E+07            | 8.47.E+07            | 7.54.E+07            |
| 1008 | P61077-1  | Ubiquitin-conjugating enzyme E2 D3 [OS=Homo sapiens]                                         | 50.623        | 4.41.E+08         | 4.09.E+08         | 3.98.E+08         | 3.92.E+08         | 4.10.E+08            | 4.09.E+08            | 4.14.E+08            | 4.09.E+08            | 4.14.E+08            | 3.90.E+08            | 3.85.E+08            | 3.83.E+08            |
| 1009 | Q96EY1-1  | DnaJ homolog subfamily A member 3, mitochondrial [OS=Homo sapiens]                           | 50.591        | 1.96.E+08         | 1.84.E+08         | 1.85.E+08         | 1.68.E+08         | 1.37.E+08            | 1.61.E+08            | 1.68.E+08            | 1.47.E+08            | 1.79.E+08            | 1.57.E+08            | 1.79.E+08            | 1.78.E+08            |
| 1010 | P49753-1  | Acyl-coenzyme A thioesterase 2, mitochondrial [OS=Homo sapiens]                              | 50.59         | 1.37.E+08         | 1.29.E+08         | 1.26.E+08         | 1.28.E+08         | 1.20.E+08            | 1.15.E+08            | 1.28.E+08            | 1.21.E+08            | 1.52.E+08            | 1.69.E+08            | 1.98.E+08            | 1.71.E+08            |
| 1011 | P07203    | Glutathione peroxidase 1 [OS=Homo sapiens]                                                   | 50.456        | 1.30.E+08         | 1.45.E+08         | 1.29.E+08         | 1.22.E+08         | 2.07.E+08            | 1.99.E+08            | 2.21.E+08            | 2.24.E+08            | 2.07.E+08            | 1.72.E+08            | 1.88.E+08            | 2.38.E+08            |
| 1012 | Q9UBB4-1  | Ataxin-10 [OS=Homo sapiens]                                                                  | 50.411        | 1.36.E+08         | 1.16.E+08         | 9.93.E+07         | 1.22.E+08         | 1.33.E+08            | 1.21.E+08            | 1.19.E+08            | 1.11.E+08            | 1.47.E+08            | 1.23.E+08            | 1.26.E+08            | 1.29.E+08            |
| 1013 | Q6IBS0    | Twinfilin-2 [OS=Homo sapiens]                                                                | 50.351        | 4.24.E+07         | 5.60.E+07         | 5.38.E+07         | 5.75.E+07         | 6.52.E+07            | 7.73.E+07            | 7.21.E+07            | 6.93.E+07            | 6.35.E+07            | 6.62.E+07            | 6.37.E+07            | 7.21.E+07            |
| 1014 | Q15717    | ELAV-like protein 1 [OS=Homo sapiens]                                                        | 50.193        | 4.38.E+08         | 4.94.E+08         | 4.96.E+08         | 4.65.E+08         | 4.68.E+08            | 4.87.E+08            | 5.02.E+08            | 4.99.E+08            | 4.93.E+08            | 5.04.E+08            | 4.79.E+08            | 4.79.E+08            |
| 1015 | Q9UBX3    | Mitochondrial dicarboxylate carrier [OS=Homo sapiens]                                        | 50.121        | 1.19.E+08         | 1.22.E+08         | 1.26.E+08         | 1.34.E+08         | 1.09.E+08            | 1.07.E+08            | 1.22.E+08            | 1.21.E+08            | 8.75.E+07            | 9.98.E+07            | 1.01.E+08            | 1.09.E+08            |
| 1016 | Q15370    | Elongin-B [OS=Homo sapiens]                                                                  | 50.071        | 2.41.E+08         | 2.35.E+08         | 2.51.E+08         | 2.50.E+08         | 2.61.E+08            | 2.90.E+08            | 2.48.E+08            | 2.75.E+08            | 2.62.E+08            | 2.97.E+08            | 3.03.E+08            | 2.75.E+08            |
| 1017 | P27694    | Replication protein A 70 kDa DNA-binding subunit [OS=Homo sapiens]                           | 50.009        | 1.44.E+08         | 1.35.E+08         | 1.47.E+08         | 1.62.E+08         | 1.33.E+08            | 1.49.E+08            | 1.58.E+08            | 1.36.E+08            | 1.54.E+08            | 1.31.E+08            | 1.50.E+08            | 1.55.E+08            |
| 1018 | Q9BZE9    | tether containing UBX domain for GLUT4 [OS=Homo sapiens]                                     | 49.854        | 7.70.E+07         | 6.55.E+07         | 6.95.E+07         | 6.98.E+07         | 3.49.E+07            | 3.14.E+07            | 5.29.E+07            | 3.41.E+07            | 4.80.E+07            | 3.70.E+07            | 3.36.E+07            | 4.28.E+07            |
| 1019 | Q9ULC4-1  | Malignant T-cell-amplified sequence 1 [OS=Homo sapiens]                                      | 49.759        | 1.81.E+08         | 1.39.E+08         | 1.55.E+08         | 1.63.E+08         | 1.67.E+08            | 1.51.E+08            | 1.49.E+08            | 1.55.E+08            | 1.70.E+08            | 1.87.E+08            | 1.70.E+08            | 2.01.E+08            |
| 1020 | Q92621    | Nuclear pore complex protein Nup205 [OS=Homo sapiens]                                        | 49.728        | 6.92.E+07         | 7.21.E+07         | 5.68.E+07         | 5.64.E+07         | 5.64.E+07            | 5.17.E+07            | 6.23.E+07            | 5.43.E+07            | 6.18.E+07            | 6.39.E+07            | 6.28.E+07            | 6.81.E+07            |
| 1021 | O75937    | DnaJ homolog subfamily C member 8 [OS=Homo sapiens]                                          | 49.67         | 1.43.E+08         | 1.47.E+08         | 1.39.E+08         | 1.36.E+08         | 1.32.E+08            | 1.32.E+08            | 1.30.E+08            | 1.35.E+08            | 1.67.E+08            | 1.68.E+08            | 1.55.E+08            | 1.61.E+08            |
| 1022 | O43747-1  | AP-1 complex subunit gamma-1 [OS=Homo sapiens]                                               | 49.627        | 2.50.E+08         | 1.44.E+08         | 1.96.E+08         | 1.30.E+08         | 1.90.E+08            | 1.85.E+08            | 1.81.E+08            | 1.75.E+08            | 2.14.E+08            | 1.98.E+08            | 1.85.E+08            | 1.85.E+08            |
| 1023 | Q9H727    | Prostaglandin E synthase 2 [OS=Homo sapiens]                                                 | 49.626        | 1.22.E+08         | 1.31.E+08         | 1.21.E+08         | 1.51.E+08         | 1.18.E+08            | 6.18.E+07            | 8.26.E+07            | 7.85.E+07            | 8.79.E+07            | 1.25.E+08            | 9.88.E+07            | 1.62.E+08            |
| 1024 | P48739    | Phosphatidylinositol transfer protein beta isoform [OS=Homo sapiens]                         | 49.567        | 3.78.E+08         | 4.19.E+08         | 4.05.E+08         | 3.78.E+08         | 4.14.E+08            | 4.00.E+08            | 4.01.E+08            | 4.02.E+08            | 4.08.E+08            | 4.32.E+08            | 4.13.E+08            | 4.05.E+08            |
| 1025 | P10155-1  | 60 kDa SS-A/Ro ribonucleoprotein [OS=Homo sapiens]                                           | 49.539        | 1.76.E+08         | 1.92.E+08         | 1.87.E+08         | 1.69.E+08         | 1.87.E+08            | 1.48.E+08            | 1.63.E+08            | 1.55.E+08            | 1.73.E+08            | 1.75.E+08            | 1.68.E+08            | 1.63.E+08            |
| 1026 | P43246-1  | DNA mismatch repair protein MSH2 [OS=Homo sapiens]                                           | 49.522        | 3.56.E+08         | 3.74.E+08         | 3.78.E+08         | 3.95.E+08         | 3.68.E+08            | 4.11.E+08            | 4.22.E+08            | 3.94.E+08            | 2.39.E+08            | 3.37.E+08            | 3.54.E+08            | 3.68.E+08            |
| 1027 | O43813    | LanC-like protein 1 [OS=Homo sapiens]                                                        | 49.518        | 4.58.E+08         | 4.53.E+08         | 4.33.E+08         | 4.96.E+08         | 3.38.E+08            | 3.93.E+08            | 3.61.E+08            | 3.52.E+08            | 3.93.E+08            | 3.54.E+08            | 3.73.E+08            | 3.86.E+08            |
| 1028 | Q9UI30    | Multifunctional methyltransferase subunit TRM112-like protein [OS=Homo sapiens]              | 49.458        | 1.59.E+08         | 1.46.E+08         | 1.52.E+08         | 1.61.E+08         | 1.31.E+08            | 1.43.E+08            | 1.40.E+08            | 1.39.E+08            | 1.39.E+08            | 1.39.E+08            | 1.39.E+08            | 1.34.E+08            |
| 1029 | Q9C005    | Protein dpy-30 homolog [OS=Homo sapiens]                                                     | 49.404        | 6.61.E+07         | 5.71.E+07         | 6.57.E+07         | 7.77.E+07         | 6.53.E+07            | 6.95.E+07            | 7.63.E+07            | 6.78.E+07            | 8.20.E+07            | 9.30.E+07            | 9.12.E+07            | 9.69.E+07            |
| 1030 | P49419    | Alpha-aminoadipic semialdehyde dehydrogenase [OS=Homo sapiens]                               | 49.362        | 2.34.E+08         | 4.31.E+08         | 4.14.E+08         | 2.35.E+08         | 3.47.E+08            | 2.26.E+08            | 2.35.E+08            | 2.23.E+08            | 2.94.E+08            | 2.82.E+08            | 2.90.E+08            | 4.20.E+08            |
| 1031 | Q92974    | Rho guanine nucleotide exchange factor 2 [OS=Homo sapiens]                                   | 49.292        | 2.11.E+07         | 1.72.E+07         | 5.04.E+07         | 1.59.E+07         | 4.01.E+07            | 1.23.E+08            | 5.93.E+07            | 1.03.E+08            | 1.13.E+07            | 9.75.E+06            | 1.71.E+07            | 1.16.E+07            |
| 1032 | P61769    | Beta-2-microglobulin [OS=Homo sapiens]                                                       | 49.236        | 2.66.E+08         | 2.36.E+08         | 2.30.E+08         | 2.75.E+08         | 2.83.E+08            | 2.77.E+08            | 2.79.E+08            | 2.55.E+08            | 3.29.E+08            | 3.46.E+08            | 3.09.E+08            | 3.26.E+08            |
| 1033 | P28340    | DNA polymerase delta catalytic subunit [OS=Homo sapiens]                                     | 49.191        | 1.27.E+08         | 1.11.E+08         | 1.43.E+08         | 5.78.E+07         | 1.17.E+08            | 1.24.E+08            | 1.42.E+08            | 1.29.E+08            | 9.81.E+07            | 1.01.E+08            | 1.05.E+08            | 1.01.E+08            |
| 1034 | Q9BVK6    | Transmembrane emp24 domain-containing protein 9 [OS=Homo sapiens]                            | 49.098        | 2.74.E+08         | 2.61.E+08         | 2.77.E+08         | 2.64.E+08         | 2.66.E+08            | 2.65.E+08            | 2.56.E+08            | 2.80.E+08            | 2.76.E+08            | 2.78.E+08            | 2.85.E+08            | 3.17.E+08            |
| 1035 | P67775    | Serine/threonine-protein phosphatase 2A catalytic subunit alpha isoform [OS=Homo sapiens]    | 48.984        | 3.45.E+08         | 3.32.E+08         | 3.46.E+08         | 3.42.E+08         | 3.64.E+08            | 3.55.E+08            | 3.56.E+08            | 3.39.E+08            | 3.52.E+08            | 3.54.E+08            | 3.27.E+08            | 3.65.E+08            |
| 1036 | Q722W4    | zinc finger CCH-type antiviral protein 1 [OS=Homo sapiens]                                   | 48.672        | 1.07.E+08         | 7.27.E+07         | 1.32.E+08         | 1.21.E+08         | 1.45.E+08            | 1.30.E+08            | 1.19.E+08            | 1.27.E+08            | 1.56.E+08            | 1.39.E+08            | 1.44.E+08            | 1.43.E+08            |
| 1037 | Q99536    | Synaptic vesicle membrane protein VAT-1 homolog [OS=Homo sapiens]                            | 48.658        | 1.25.E+08         | 1.92.E+08         | 1.74.E+08         | 1.86.E+08         | 1.32.E+08            | 1.29.E+08            | 1.57.E+08            | 1.09.E+08            | 1.92.E+08            | 1.75.E+08            | 1.85.E+08            | 1.79.E+08            |
| 1038 | O75436-1  | Vacuolar protein sorting-associated protein 26A [OS=Homo sapiens]                            | 48.641        | 1.18.E+08         | 1.18.E+08         | 1.13.E+08         | 1.10.E+08         | 1.17.E+08            | 1.13.E+08            | 1.21.E+08            | 1.07.E+08            | 1.34.E+08            | 1.36.E+08            | 1.43.E+08            | 1.45.E+08            |
| 1039 | Q9P035    | Very-long-chain (3R)-3-hydroxyacyl-CoA dehydratase 3 [OS=Homo sapiens]                       | 48.466        | 3.34.E+08         | 3.25.E+08         | 3.40.E+08         | 3.48.E+08         | 3.20.E+08            | 3.61.E+08            | 3.45.E+08            | 3.17.E+08            | 3.67.E+08            | 3.75.E+08            | 3.55.E+08            | 3.77.E+08            |
| 1040 | Q9Y3A5    | Ribosome maturation protein SBDS [OS=Homo sapiens]                                           | 48.363        | 3.01.E+08         | 2.57.E+08         | 2.50.E+08         | 2.92.E+08         | 2.57.E+08            | 3.07.E+08            | 2.95.E+08            | 2.91.E+08            | 2.55.E+08            | 2.68.E+08            | 2.79.E+08            | 2.61.E+08            |
| 1041 | P61326-2  | Isoform 2 of Protein mago nashi homolog [OS=Homo sapiens]                                    | 48.299        |                   |                   |                   |                   |                      |                      |                      |                      |                      |                      |                      |                      |
| 1042 | Q9H8Y8-1  | Golgi reassembly-stacking protein 2 [OS=Homo sapiens]                                        | 48.255        | 1.32.E+08         | 1.26.E+08         | 1.21.E+08         | 1.43.E+08         | 1.25.E+08            | 1.39.E+08            | 1.29.E+08            | 1.21.E+08            | 1.35.E+08            | 1.44.E+08            | 1.36.E+08            | 1.60.E+08            |
| 1043 | P22061    | protein-L-isoaspartate(D-aspartate) O-methyltransferase [OS=Homo sapiens]                    | 48.244        | 1.21.E+08         | 1.24.E+08         | 1.38.E+08         | 1.37.E+08         | 1.45.E+08            | 1.40.E+08            | 1.42.E+08            | 1.33.E+08            | 1.45.E+08            | 1.50.E+08            | 1.32.E+08            | 1.52.E+08            |
| 1044 | Q92538    | Golgi-specific brefeldin A-resistance guanine nucleotide exchange factor 1 [OS=Homo sapiens] | 48.076        | 7.28.E+07         | 6.81.E+07         | 6.99.E+07         | 6.45.E+07         | 6.07.E+07            | 7.93.E+07            | 8.42.E+07            | 6.67.E+07            | 7.20.E+07            | 7.04.E+07            | 7.51.E+07            | 6.09.E+07            |
| 1045 | Q93009    | Ubiquitin carboxyl-terminal hydrolase 7 [OS=Homo sapiens]                                    | 48.008        | 1.15.E+08         | 1.14.E+08         | 1.11.E+08         | 1.15.E+08         | 1.18.E+08            | 1.24.E+08            | 1.27.E+08            | 7.88.E+07            | 1.14.E+08            | 1.10.E+08            | 1.26.E+08            | 1.25.E+08            |
| 1046 | Q99471-1  | prefoldin subunit 5 [OS=Homo sapiens]                                                        | 47.972        | 1.14.E+08         | 9.80.E+07         | 1.00.E+08         | 1.06.E+08         | 8.97.E+07            | 8.78.E+07            | 9.26.E+07            | 8.64.E+07            | 1.05.E+08            | 1.07.E+08            | 1.10.E+08            | 1.22.E+08            |
| 1047 | P49902    | Cytosolic purine 5'-nucleotidase [OS=Homo sapiens]                                           | 47.948        | 6.16.E+07         | 6.65.E+07         | 7.96.E+07         | 8.43.E+07         | 6.25.E+07            | 6.00.E+07            | 5.95.E+07            | 6.80.E+07            | 8.45.E+07            | 8.91.E+07            | 8.77.E+07            | 9.35.E+07            |
| 1048 | O60437    | periplakin [OS=Homo sapiens]                                                                 | 47.878        | 1.79.E+08         | 1.49.E+08         | 1.18.E+08         | 2.00.E+08         | 1.44.E+08            | 1.58.E+08            | 1.70.E+08            | 1.27.E+08            | 1.64.E+08            | 1.41.E+08            | 1.40.E+08            | 1.38.E+08            |
| 1049 | P53634-1  | Dipeptidyl peptidase 1 [OS=Homo sapiens]                                                     | 47.671        | 9.39.E+07         | 1.01.E+08         | 8.35.E+07         | 9.33.E+07         | 1.67.E+08            | 1.68.E+08            | 1.70.E+08            | 1.68.E+08            | 2.15.E+08            | 2.06.E+08            | 2.04.E+08            | 2.14.E+08            |
| 1050 | Q9UL25    | Ras-related protein Rab-21 [OS=Homo sapiens]                                                 | 47.557        | 1.09.E+08         | 1.15.E+08         | 1.05.E+08         | 1.34.E+08         | 1.13.E+08            | 1.20.E+08            | 1.08.E+08            | 1.00.E+08            | 1.21.E+08            | 1.16.E+08            | 1.00.E+08            | 1.07.E+08            |
| 1051 | P56545    | c-terminal-binding protein 2 [OS=Homo sapiens]                                               | 47.417        | 1.49.E+08         | 1.11.E+08         | 1.42.E+08         | 1.09.E+08         | 1.47.E+08            | 1.42.E+08            | 1.31.E+08            | 1.36.E+08            | 1.25.E+08            | 1.25.E+08            | 1.36.E+08            | 1.44.E+08            |
| 1052 | Q9BWM7    | Sideroflexin-3 [OS=Homo sapiens]                                                             | 47.289        | 4.88.E+07         | 5.93.E+07         | 6.02.E+07         | 7.05.E+07         | 7.53.E+07            | 8.44.E+07            | 9.02.E+07            | 9.23.E+07            | 1.02.E+08            | 1.02.E+08            | 1.03.E+08            | 9.98.E+07            |
| 1053 | Q96TA2-1  | ATP-dependent zinc metalloprotease YME1L1 [OS=Homo sapiens]                                  | 47.266        | 1.37.E+08         | 1.25.E+08         | 1.32.E+08         | 1.37.E+08         | 1.13.E+08            | 1.62.E+08            | 1.56.E+08            | 1.40.E+08            | 1.52.E+08            | 1.26.E+08            | 1.28.E+08            | 1.32.E+08            |
| 1054 | P50897    | Palmitoyl-protein thioesterase 1 [OS=Homo sapiens]                                           | 47.214        | 1.56.E+08         | 1.45.E+08         | 1.58.E+08         | 9.78.E+07         | 1.38.E+08            | 1.35.E+08            | 1.44.E+08            | 1.29.E+08            | 1.68.E+08            | 1.52.E+08            | 1.60.E+08            | 1.69.E+08            |
| 1055 | P07686    | Beta-hexosaminidase subunit beta [OS=Homo sapiens]                                           | 47.026        | 1.28.E+08         | 1.13.E+08         | 1.19.E+08         | 1.36.E+08         | 1.10.E+08            | 1.14.E+08            | 1.02.E+08            | 1.10.E+08            | 1.48.E+08            | 1.36.E+08            | 1.40.E+08            | 1.17.E+08            |
| 1056 | P28070    | Proteasome subunit beta type-4 [OS=Homo sapiens]                                             | 46.944        | 3.45.E+08         | 3.24.E+08         | 3.67.E+08         | 3.69.E+08         | 3.22.E+08            | 3.05.E+08            | 3.35.E+08            | 3.10.E+08            | 3.42.E+08            | 3.55.E+08            | 3.50.E+08            | 3.64.E+08            |
| 1057 | Q9HD45    | Transmembrane 9 superfamily member 3 [OS=Homo sapiens]                                       | 46.855        | 2.66.E+08         | 2.81.E+08         | 2.91.E+08         | 3.11.E+08         | 3.28.E+08            | 3.41.E+08            | 3.31.E+08            | 3.32.E+08            | 2.64.E+08            | 3.02.E+08            | 2.81.E+08            | 2.72.E+08            |

| No.  | Accession | Description                                                                                     | Sum PEP Score | CTRL Abundances_1 | CTRL Abundances_2 | CTRL Abundances_3 | CTRL Abundances_4 | CLDN6-1 Abundances_1 | CLDN6-1 Abundances_2 | CLDN6-1 Abundances_3 | CLDN6-1 Abundances_4 | CLDN6-2 Abundances_1 | CLDN6-2 Abundances_2 | CLDN6-2 Abundances_3 | CLDN6-2 Abundances_4 |
|------|-----------|-------------------------------------------------------------------------------------------------|---------------|-------------------|-------------------|-------------------|-------------------|----------------------|----------------------|----------------------|----------------------|----------------------|----------------------|----------------------|----------------------|
| 1058 | P08574    | Cytochrome c1, heme protein, mitochondrial [OS=Homo sapiens]                                    | 46.829        | 1.30.E+08         | 1.12.E+08         | 1.16.E+08         | 1.34.E+08         | 1.05.E+08            | 1.05.E+08            | 1.03.E+08            | 1.04.E+08            | 1.21.E+08            | 1.12.E+08            | 1.13.E+08            | 1.33.E+08            |
| 1059 | Q96N66-1  | Lysophospholipid acyltransferase 7 [OS=Homo sapiens]                                            | 46.824        | 1.82.E+08         | 1.70.E+08         | 1.77.E+08         | 1.72.E+08         | 2.42.E+08            | 2.54.E+08            | 2.61.E+08            | 2.52.E+08            | 1.74.E+08            | 1.72.E+08            | 1.59.E+08            | 1.61.E+08            |
| 1060 | P02795    | metallothionein-2 [OS=Homo sapiens]                                                             | 46.729        | 7.92.E+07         | 8.05.E+07         | 7.99.E+07         | 8.84.E+07         | 5.68.E+07            | 5.80.E+07            | 5.72.E+07            | 4.85.E+07            | 8.92.E+07            | 9.74.E+07            | 9.71.E+07            | 9.16.E+07            |
| 1061 | P62633-4  | Isoform 4 of Cellular nucleic acid-binding protein [OS=Homo sapiens]                            | 46.716        | 4.04.E+06         | 3.75.E+06         | 4.83.E+06         | 4.30.E+06         | 3.19.E+06            | 4.01.E+06            | 3.35.E+06            | 1.49.E+06            | 3.46.E+06            | 6.70.E+06            | 5.31.E+06            | 4.71.E+06            |
| 1062 | P07108    | acyl-CoA-binding protein [OS=Homo sapiens]                                                      | 46.687        | 2.89.E+08         | 1.62.E+08         | 2.76.E+08         | 2.80.E+08         | 2.29.E+08            | 1.92.E+08            | 3.09.E+08            | 3.36.E+08            | 2.94.E+08            | 1.87.E+08            | 1.28.E+08            | 2.57.E+08            |
| 1063 | Q13492-1  | Phosphatidylinositol-binding clathrin assembly protein [OS=Homo sapiens]                        | 46.593        | 5.22.E+07         | 8.24.E+07         | 5.60.E+07         | 7.37.E+07         | 5.61.E+07            | 1.15.E+08            | 5.70.E+07            | 4.95.E+07            | 9.88.E+07            | 9.21.E+07            | 4.90.E+07            | 8.78.E+07            |
| 1064 | Q96S19    | spermatid perinuclear RNA-binding protein [OS=Homo sapiens]                                     | 46.555        | 1.29.E+07         | 1.40.E+07         |                   | 3.84.E+06         | 1.33.E+07            | 8.06.E+06            | 7.73.E+06            | 4.90.E+06            | 1.25.E+07            | 4.52.E+06            | 6.90.E+06            |                      |
| 1065 | P61254    | 60S ribosomal protein L26 [OS=Homo sapiens]                                                     | 46.549        | 1.31.E+09         | 1.32.E+09         | 1.25.E+09         | 1.27.E+09         | 1.39.E+09            | 1.34.E+09            | 1.35.E+09            | 1.34.E+09            | 1.20.E+09            | 1.10.E+09            | 1.14.E+09            | 1.11.E+09            |
| 1066 | O94826    | Mitochondrial import receptor subunit TOM70 [OS=Homo sapiens]                                   | 46.35         | 1.09.E+08         | 1.06.E+08         | 1.01.E+08         | 1.04.E+08         | 9.47.E+07            | 9.00.E+07            | 9.33.E+07            | 9.42.E+07            | 9.87.E+07            | 8.46.E+07            | 8.76.E+07            | 9.20.E+07            |
| 1067 | O75608    | Acyl-protein thioesterase 1 [OS=Homo sapiens]                                                   | 46.348        | 6.74.E+07         | 7.69.E+07         | 8.05.E+07         | 9.15.E+07         | 8.36.E+07            | 8.41.E+07            | 8.49.E+07            | 7.34.E+07            | 7.25.E+07            | 8.55.E+07            | 7.91.E+07            | 7.51.E+07            |
| 1068 | Q12797    | Aspartyl/Asparaginyl beta-hydroxylase [OS=Homo sapiens]                                         | 46.299        | 1.25.E+08         | 1.34.E+08         | 1.24.E+08         | 1.19.E+08         | 1.35.E+08            | 1.10.E+08            | 1.25.E+08            | 1.32.E+08            | 1.71.E+08            | 1.62.E+08            | 1.63.E+08            | 1.80.E+08            |
| 1069 | Q9Y4P3    | Transducin beta-like protein 2 [OS=Homo sapiens]                                                | 46.14         | 8.02.E+07         | 7.73.E+07         | 5.49.E+07         | 8.73.E+07         | 4.71.E+07            | 7.67.E+07            | 6.82.E+07            | 5.99.E+07            | 7.61.E+07            | 9.28.E+07            | 8.98.E+07            | 9.46.E+07            |
| 1070 | Q5SSJ5-1  | Heterochromatin protein 1-binding protein 3 [OS=Homo sapiens]                                   | 46.041        | 9.64.E+07         | 9.64.E+07         | 8.75.E+07         | 8.15.E+07         | 7.25.E+07            | 8.58.E+07            | 8.55.E+07            | 7.90.E+07            | 8.14.E+07            | 1.10.E+08            | 9.46.E+07            | 1.00.E+08            |
| 1071 | Q9UBS4    | DnaJ homolog subfamily B member 11 [OS=Homo sapiens]                                            | 46.009        | 1.96.E+08         | 1.94.E+08         | 2.21.E+08         | 2.05.E+08         | 1.86.E+08            | 2.03.E+08            | 2.10.E+08            | 2.08.E+08            | 1.61.E+08            | 2.15.E+08            | 1.95.E+08            | 2.20.E+08            |
| 1072 | O43765    | Small glutamine-rich tetratricopeptide repeat-containing protein alpha [OS=Homo sapiens]        | 45.975        | 1.02.E+08         | 1.06.E+08         | 1.04.E+08         | 1.10.E+08         | 1.16.E+08            | 1.13.E+08            | 1.13.E+08            | 1.13.E+08            | 1.31.E+08            | 1.30.E+08            | 1.28.E+08            | 1.29.E+08            |
| 1073 | Q9HCY8    | protein S100-A14 [OS=Homo sapiens]                                                              | 45.903        | 4.43.E+08         | 4.57.E+08         | 4.24.E+08         | 3.92.E+08         | 3.68.E+08            | 3.42.E+08            | 3.43.E+08            | 3.58.E+08            | 3.58.E+08            | 3.34.E+08            | 3.49.E+08            | 3.39.E+08            |
| 1074 | Q9Y624    | Junctional adhesion molecule A [OS=Homo sapiens]                                                | 45.843        | 2.46.E+08         | 2.53.E+08         | 2.79.E+08         | 2.62.E+08         | 2.66.E+08            | 2.80.E+08            | 2.81.E+08            | 2.80.E+08            | 2.26.E+08            | 2.19.E+08            | 2.31.E+08            | 2.46.E+08            |
| 1075 | Q5JTH9-1  | RRP12-like protein [OS=Homo sapiens]                                                            | 45.722        | 7.49.E+07         | 6.94.E+07         | 6.41.E+07         | 7.47.E+07         | 7.53.E+07            | 6.78.E+07            | 6.94.E+07            | 6.71.E+07            | 5.19.E+07            | 5.35.E+07            | 5.30.E+07            | 5.98.E+07            |
| 1076 | O94992    | Protein HEXIM1 [OS=Homo sapiens]                                                                | 45.702        | 6.75.E+07         | 2.09.E+08         | 1.04.E+08         | 1.91.E+08         | 5.58.E+07            | 4.65.E+07            | 8.89.E+07            | 1.44.E+08            | 9.73.E+07            | 1.04.E+08            | 1.12.E+08            | 1.05.E+08            |
| 1077 | Q04760-1  | lactoylglutathione lyase [OS=Homo sapiens]                                                      | 45.693        | 3.93.E+08         | 3.92.E+08         | 3.63.E+08         | 3.80.E+08         | 3.09.E+08            | 3.12.E+08            | 3.15.E+08            | 3.29.E+08            | 3.99.E+08            | 3.75.E+08            | 3.69.E+08            | 3.53.E+08            |
| 1078 | Q96C36    | Pyruvate-5-carboxylate reductase 2 [OS=Homo sapiens]                                            | 45.662        | 1.41.E+08         | 1.47.E+08         | 1.40.E+08         | 1.23.E+08         | 1.08.E+08            | 1.07.E+08            | 1.03.E+08            | 1.11.E+08            | 1.25.E+08            | 1.13.E+08            | 1.27.E+08            | 1.25.E+08            |
| 1079 | Q04323-1  | UBX domain-containing protein 1 [OS=Homo sapiens]                                               | 45.625        | 1.15.E+08         | 1.20.E+08         | 1.25.E+08         | 1.31.E+08         | 9.57.E+07            | 1.00.E+08            | 1.39.E+08            | 1.24.E+08            | 1.31.E+08            | 1.69.E+08            | 1.46.E+08            | 1.39.E+08            |
| 1080 | Q9HC38-2  | Isoform 2 of Glyoxalase domain-containing protein 4 [OS=Homo sapiens]                           | 45.443        | 1.90.E+08         | 1.82.E+08         | 1.81.E+08         | 2.12.E+08         | 1.75.E+08            | 1.71.E+08            | 1.66.E+08            | 1.67.E+08            | 1.50.E+08            | 1.48.E+08            | 1.43.E+08            | 1.49.E+08            |
| 1081 | Q9Y3U8    | 60S ribosomal protein L36 [OS=Homo sapiens]                                                     | 45.419        | 1.45.E+09         | 1.47.E+09         | 1.54.E+09         | 1.44.E+09         | 1.40.E+09            | 1.41.E+09            | 1.37.E+09            | 1.41.E+09            | 1.31.E+09            | 1.42.E+09            | 1.42.E+09            | 1.38.E+09            |
| 1082 | Q02978    | Mitochondrial 2-oxoglutarate/malate carrier protein [OS=Homo sapiens]                           | 45.156        | 1.66.E+08         | 1.64.E+08         | 1.68.E+08         | 1.83.E+08         | 1.93.E+08            | 1.94.E+08            | 2.05.E+08            | 1.91.E+08            | 1.49.E+08            | 1.27.E+08            | 1.40.E+08            | 1.46.E+08            |
| 1083 | P46779    | 60S ribosomal protein L28 [OS=Homo sapiens]                                                     | 45.091        | 1.10.E+09         | 1.13.E+09         | 1.17.E+09         | 1.12.E+09         | 1.08.E+09            | 1.08.E+09            | 1.09.E+09            | 1.11.E+09            | 9.44.E+08            | 1.01.E+09            | 1.03.E+09            | 9.95.E+08            |
| 1084 | Q7RTV0    | PHD finger-like domain-containing protein 5A [OS=Homo sapiens]                                  | 45.041        | 1.92.E+08         | 1.98.E+08         | 1.93.E+08         | 1.91.E+08         | 1.65.E+08            | 1.76.E+08            | 1.71.E+08            | 1.80.E+08            | 1.95.E+08            | 2.12.E+08            | 2.06.E+08            | 1.91.E+08            |
| 1085 | Q92734-1  | Protein TFG [OS=Homo sapiens]                                                                   | 44.903        | 2.03.E+08         | 2.04.E+08         | 2.28.E+08         | 2.13.E+08         | 1.80.E+08            | 1.76.E+08            | 1.96.E+08            | 1.98.E+08            | 1.91.E+08            | 2.21.E+08            | 2.21.E+08            | 2.19.E+08            |
| 1086 | Q15369-1  | elongin-C [OS=Homo sapiens]                                                                     | 44.738        | 2.22.E+08         | 2.02.E+08         | 1.26.E+08         | 2.25.E+08         | 2.23.E+08            | 2.34.E+08            | 1.04.E+08            | 1.01.E+08            | 1.13.E+08            | 2.44.E+08            | 2.55.E+08            | 2.45.E+08            |
| 1087 | Q96A33-1  | Coiled-coil domain-containing protein 47 [OS=Homo sapiens]                                      | 44.727        | 2.87.E+08         | 2.59.E+08         | 3.23.E+08         | 3.03.E+08         | 2.83.E+08            | 2.82.E+08            | 2.64.E+08            | 2.80.E+08            | 2.88.E+08            | 2.96.E+08            | 3.14.E+08            | 3.22.E+08            |
| 1088 | P61970    | nuclear transport factor 2 [OS=Homo sapiens]                                                    | 44.725        | 2.09.E+08         | 1.44.E+08         | 1.96.E+08         | 1.97.E+08         | 2.00.E+08            | 1.87.E+08            | 1.95.E+08            | 1.76.E+08            | 3.10.E+08            | 3.13.E+08            | 3.20.E+08            | 3.56.E+08            |
| 1089 | P84090    | Enhancer of rudimentary homolog [OS=Homo sapiens]                                               | 44.672        | 8.38.E+08         | 7.32.E+08         | 6.90.E+08         | 6.53.E+08         | 6.46.E+08            | 6.42.E+08            | 6.34.E+08            | 6.59.E+08            | 7.41.E+08            | 6.89.E+08            | 8.66.E+08            | 8.52.E+08            |
| 1090 | P09234    | U1 small nuclear ribonucleoprotein C [OS=Homo sapiens]                                          | 44.605        | 1.32.E+08         | 1.28.E+08         | 1.14.E+08         | 1.18.E+08         | 1.11.E+08            | 1.33.E+08            | 1.02.E+08            | 1.09.E+08            | 1.37.E+08            | 1.07.E+08            | 1.11.E+08            | 1.41.E+08            |
| 1091 | Q9Y266    | nuclear migration protein nudC [OS=Homo sapiens]                                                | 44.515        | 1.79.E+08         | 1.90.E+08         | 1.91.E+08         | 2.48.E+08         | 1.84.E+08            | 1.47.E+08            | 1.46.E+08            | 1.81.E+08            | 1.82.E+08            | 2.13.E+08            | 2.09.E+08            | 2.37.E+08            |
| 1092 | Q53FA7-1  | Quinone oxidoreductase PIG3 [OS=Homo sapiens]                                                   | 44.49         | 3.14.E+08         | 3.16.E+08         | 3.17.E+08         | 2.98.E+08         | 2.08.E+08            | 2.17.E+08            | 2.19.E+08            | 2.32.E+08            | 2.21.E+08            | 2.23.E+08            | 2.25.E+08            | 2.23.E+08            |
| 1093 | P53041    | Serine/threonine-protein phosphatase 5 [OS=Homo sapiens]                                        | 44.463        | 1.82.E+08         | 1.93.E+08         | 1.86.E+08         | 1.70.E+08         | 2.05.E+08            | 1.96.E+08            | 1.98.E+08            | 1.81.E+08            | 1.56.E+08            | 1.82.E+08            | 1.70.E+08            | 1.66.E+08            |
| 1094 | P19623    | spermidine synthase [OS=Homo sapiens]                                                           | 44.419        | 2.46.E+08         | 2.09.E+08         | 2.41.E+08         | 2.25.E+08         | 2.35.E+08            | 2.34.E+08            | 2.41.E+08            | 2.44.E+08            | 2.47.E+08            | 2.48.E+08            | 2.29.E+08            | 2.51.E+08            |
| 1095 | O43795    | Unconventional myosin-Ib [OS=Homo sapiens]                                                      | 44.4          | 2.97.E+07         | 3.73.E+07         | 3.65.E+07         | 2.94.E+07         | 1.05.E+08            | 8.21.E+07            | 9.08.E+07            | 7.39.E+07            | 8.79.E+07            | 5.90.E+07            | 8.65.E+07            | 5.17.E+07            |
| 1096 | P42677    | 40S ribosomal protein S27 [OS=Homo sapiens]                                                     | 44.195        | 9.02.E+08         | 9.33.E+08         | 9.53.E+08         | 1.13.E+09         | 9.39.E+08            | 9.78.E+08            | 9.93.E+08            | 1.04.E+09            | 8.78.E+08            | 8.63.E+08            | 8.67.E+08            | 8.47.E+08            |
| 1097 | P24539    | ATP synthase F(0) complex subunit B1, mitochondrial [OS=Homo sapiens]                           | 44.136        | 1.82.E+08         | 1.85.E+08         | 2.00.E+08         | 1.90.E+08         | 1.62.E+08            | 1.62.E+08            | 1.64.E+08            | 1.53.E+08            | 1.97.E+08            | 2.22.E+08            | 2.09.E+08            | 2.09.E+08            |
| 1098 | Q9UN86    | Ras GTPase-activating protein-binding protein 2 [OS=Homo sapiens]                               | 44.087        | 8.44.E+07         | 8.00.E+07         | 7.79.E+07         | 8.40.E+07         | 8.65.E+07            | 7.65.E+07            | 7.93.E+07            | 8.30.E+07            | 8.42.E+07            | 7.98.E+07            | 7.91.E+07            | 8.57.E+07            |
| 1099 | O75569-1  | Interferon-inducible double-stranded RNA-dependent protein kinase activator A [OS=Homo sapiens] | 44.075        | 8.97.E+07         | 7.55.E+07         | 8.92.E+07         | 8.23.E+07         | 1.09.E+08            | 9.96.E+07            | 9.99.E+07            | 1.04.E+08            | 1.08.E+08            | 1.20.E+08            | 1.09.E+08            | 1.12.E+08            |
| 1100 | O15145    | Actin-related protein 2/3 complex subunit 3 [OS=Homo sapiens]                                   | 44.029        | 1.27.E+08         | 1.38.E+08         | 1.29.E+08         | 1.55.E+08         | 1.55.E+08            | 1.69.E+08            | 1.77.E+08            | 1.63.E+08            | 1.71.E+08            | 1.75.E+08            | 1.73.E+08            | 1.42.E+08            |
| 1101 | P56747    | Claudin-6 [OS=Homo sapiens]                                                                     | 44.02         |                   |                   |                   | 8.22.E+06         | 2.98.E+07            | 7.54.E+06            | 1.33.E+07            | 2.55.E+06            | 6.76.E+08            | 6.55.E+08            | 6.45.E+08            | 6.30.E+08            |
| 1102 | P28072    | Proteasome subunit beta type-6 [OS=Homo sapiens]                                                | 44.015        | 4.64.E+08         | 4.28.E+08         | 4.82.E+08         | 4.94.E+08         | 3.98.E+08            | 4.38.E+08            | 4.24.E+08            | 4.14.E+08            | 4.21.E+08            | 4.49.E+08            | 4.34.E+08            | 4.47.E+08            |
| 1103 | P61222-1  | UDP-N-acetylhexosamine pyrophosphorylase [OS=Homo sapiens]                                      | 44.011        | 1.22.E+08         | 1.09.E+08         | 1.03.E+08         | 1.03.E+08         | 1.79.E+08            | 1.82.E+08            | 1.92.E+08            | 1.93.E+08            | 2.13.E+08            | 2.20.E+08            | 2.19.E+08            | 2.29.E+08            |
| 1104 | Q6YHK3-1  | CD109 antigen [OS=Homo sapiens]                                                                 | 43.997        | 7.14.E+07         | 6.18.E+07         | 7.49.E+07         | 6.56.E+07         | 1.18.E+08            | 1.17.E+08            | 1.14.E+08            | 8.31.E+07            | 1.02.E+08            | 9.77.E+07            | 9.53.E+07            | 9.76.E+07            |
| 1105 | Q6IAA8    | regulator complex protein LAMTOR1 [OS=Homo sapiens]                                             | 43.693        | 1.68.E+08         | 1.52.E+08         | 1.59.E+08         | 9.92.E+07         | 1.39.E+08            | 1.29.E+08            | 1.36.E+08            | 1.25.E+08            | 1.68.E+08            | 1.61.E+08            | 1.65.E+08            | 1.63.E+08            |
| 1106 | Q92804-1  | TATA-binding protein-associated factor 2N [OS=Homo sapiens]                                     | 43.692        | 1.33.E+08         | 1.28.E+08         | 1.36.E+08         | 1.37.E+08         | 1.23.E+08            | 1.22.E+08            | 1.23.E+08            | 1.15.E+08            | 1.37.E+08            | 1.29.E+08            | 1.35.E+08            | 1.32.E+08            |
| 1107 | O14672    | Disintegrin and metalloproteinase domain-containing protein 10 [OS=Homo sapiens]                | 43.629        | 1.14.E+08         | 1.23.E+08         | 1.27.E+08         | 1.09.E+08         | 1.34.E+08            | 1.35.E+08            | 1.42.E+08            | 1.40.E+08            | 1.15.E+08            | 1.22.E+08            | 1.31.E+08            | 1.20.E+08            |
| 1108 | P32929    | Cystathionine gamma-lyase [OS=Homo sapiens]                                                     | 43.427        | 8.05.E+07         | 5.65.E+07         | 5.75.E+07         | 6.13.E+07         | 7.65.E+07            | 7.51.E+07            | 7.34.E+07            | 6.63.E+07            | 4.21.E+07            | 4.08.E+07            | 4.10.E+07            | 4.15.E+07            |
| 1109 | Q96124-1  | Far upstream element-binding protein 3 [OS=Homo sapiens]                                        | 43.138        | 1.83.E+08         | 2.67.E+08         | 2.62.E+08         | 2.54.E+08         | 2.31.E+08            | 2.48.E+08            | 2.50.E+08            | 2.43.E+08            | 2.34.E+08            | 2.55.E+08            | 2.57.E+08            | 2.59.E+08            |
| 1110 | Q8N5N7    | 39S ribosomal protein L50, mitochondrial [OS=Homo sapiens]                                      | 42.978        | 5.87.E+07         | 6.10.E+07         | 6.36.E+07         | 7.47.E+07         | 6.69.E+07            | 7.02.E+07            | 6.71.E+07            | 6.15.E+07            | 5.79.E+07            | 7.08.E+07            | 4.19.E+07            | 7.74.E+07            |
| 1111 | Q9UKX7    | Nuclear pore complex protein Nup50 [OS=Homo sapiens]                                            | 42.941        | 1.22.E+08         | 5.54.E+07         | 1.08.E+08         | 7.49.E+07         | 5.94.E+07            | 5.23.E+07            | 5.25.E+07            | 6.82.E+07            | 7.40.E+07            | 1.37.E+08            | 1.26.E+08            | 1.29.E+08            |
| 1112 | P99999    | cytochrome c [OS=Homo sapiens]                                                                  | 42.79         | 8.00.E+08         | 8.08.E+08         | 7.60.E+08         | 6.91.E+08         | 8.09.E+08            | 7.98.E+08            | 7.72.E+08            | 7.89.E+08            | 8.51.E+08            | 8.09.E+08            | 7.72.E+08            | 7.51.E+08            |

Supplemental Data 1. List of identified proteins

| No.  | Accession | Description                                                                                        | Sum PEP Score | CTRL Abundances_1 | CTRL Abundances_2 | CTRL Abundances_3 | CTRL Abundances_4 | CLDN6-1 Abundances_1 | CLDN6-1 Abundances_2 | CLDN6-1 Abundances_3 | CLDN6-1 Abundances_4 | CLDN6-2 Abundances_1 | CLDN6-2 Abundances_2 | CLDN6-2 Abundances_3 | CLDN6-2 Abundances_4 |
|------|-----------|----------------------------------------------------------------------------------------------------|---------------|-------------------|-------------------|-------------------|-------------------|----------------------|----------------------|----------------------|----------------------|----------------------|----------------------|----------------------|----------------------|
| 1113 | O14950    | Myosin regulatory light chain 12B [OS=Homo sapiens]                                                | 42.76         | 4.60.E+08         | 4.67.E+08         | 4.78.E+08         | 4.93.E+08         | 5.75.E+08            | 5.67.E+08            | 5.49.E+08            | 5.38.E+08            | 5.40.E+08            | 5.15.E+08            | 4.84.E+08            | 4.99.E+08            |
| 1114 | Q9BRR6-1  | ADP-dependent glucokinase [OS=Homo sapiens]                                                        | 42.702        | 8.49.E+07         | 9.00.E+07         | 9.41.E+07         | 9.00.E+07         | 9.72.E+07            | 1.05.E+08            | 1.08.E+08            | 1.02.E+08            | 7.34.E+07            | 6.80.E+07            | 7.94.E+07            | 8.21.E+07            |
| 1115 | Q9BYD3    | 39S ribosomal protein L4, mitochondrial [OS=Homo sapiens]                                          | 42.69         | 5.80.E+07         | 5.76.E+07         | 5.48.E+07         | 6.14.E+07         | 5.74.E+07            | 5.76.E+07            | 3.63.E+07            | 4.84.E+07            | 3.63.E+07            | 1.95.E+07            | 5.04.E+07            | 5.20.E+07            |
| 1116 | Q13596    | Sorting nexin-1 [OS=Homo sapiens]                                                                  | 42.557        | 1.63.E+08         | 1.56.E+08         | 1.53.E+08         | 1.51.E+08         | 1.45.E+08            | 1.80.E+08            | 1.69.E+08            | 1.87.E+08            | 1.92.E+08            | 1.80.E+08            | 1.97.E+08            | 1.75.E+08            |
| 1117 | Q92747    | Actin-related protein 2/3 complex subunit 1A [OS=Homo sapiens]                                     | 42.51         | 5.61.E+07         | 5.73.E+07         | 6.05.E+07         | 5.85.E+07         | 6.53.E+07            | 6.53.E+07            | 6.54.E+07            | 5.56.E+07            | 6.57.E+07            | 6.17.E+07            | 6.84.E+07            | 7.34.E+07            |
| 1118 | P08240-1  | signal recognition particle receptor subunit alpha [OS=Homo sapiens]                               | 42.5          | 1.20.E+08         | 1.16.E+08         | 7.06.E+07         | 1.21.E+08         | 9.85.E+07            | 8.70.E+07            | 8.35.E+07            | 1.01.E+08            | 1.01.E+08            | 5.98.E+07            | 8.70.E+07            | 8.77.E+07            |
| 1119 | O43681    | ATPase ASNA1 [OS=Homo sapiens]                                                                     | 42.477        | 5.08.E+08         | 5.74.E+08         | 6.30.E+08         | 7.40.E+08         | 7.41.E+08            | 9.10.E+08            | 8.76.E+08            | 8.57.E+08            | 6.97.E+08            | 8.60.E+08            | 8.47.E+08            | 1.04.E+09            |
| 1120 | Q9NZI8    | Insulin-like growth factor 2 mRNA-binding protein 1 [OS=Homo sapiens]                              | 42.383        | 6.00.E+07         | 4.19.E+07         | 3.21.E+07         | 4.71.E+07         | 4.24.E+07            | 3.31.E+07            | 3.33.E+07            | 2.46.E+07            | 4.54.E+07            | 4.01.E+07            | 1.68.E+07            | 3.67.E+07            |
| 1121 | P30519    | Heme oxygenase 2 [OS=Homo sapiens]                                                                 | 42.36         | 1.19.E+08         | 1.54.E+08         | 8.91.E+07         | 1.55.E+08         | 1.27.E+08            | 1.13.E+08            | 1.17.E+08            | 1.09.E+08            | 2.32.E+08            | 2.26.E+08            | 2.21.E+08            | 2.20.E+08            |
| 1122 | O75347    | Tubulin-specific chaperone A [OS=Homo sapiens]                                                     | 42.359        | 2.89.E+08         | 2.96.E+08         | 2.75.E+08         | 2.68.E+08         | 2.73.E+08            | 2.71.E+08            | 2.53.E+08            | 2.72.E+08            | 2.75.E+08            | 2.79.E+08            | 2.88.E+08            | 2.80.E+08            |
| 1123 | Q12874    | splicing factor 3a subunit 3 [OS=Homo sapiens]                                                     | 42.344        | 3.23.E+08         | 3.43.E+08         | 3.54.E+08         | 3.85.E+08         | 3.49.E+08            | 3.78.E+08            | 3.82.E+08            | 3.92.E+08            | 3.91.E+08            | 4.21.E+08            | 4.13.E+08            | 3.79.E+08            |
| 1124 | Q13442    | 28 kDa heat- and acid-stable phosphoprotein [OS=Homo sapiens]                                      | 42.289        | 3.16.E+08         | 3.25.E+08         | 3.30.E+08         | 3.12.E+08         | 2.65.E+08            | 2.76.E+08            | 2.72.E+08            | 2.23.E+08            | 4.13.E+08            | 3.95.E+08            | 3.63.E+08            | 3.53.E+08            |
| 1125 | P51148    | Ras-related protein Rab-5C [OS=Homo sapiens]                                                       | 42.195        | 3.34.E+08         | 3.36.E+08         | 3.29.E+08         | 3.24.E+08         | 3.40.E+08            | 3.29.E+08            | 3.44.E+08            | 3.62.E+08            | 3.48.E+08            | 3.47.E+08            | 3.44.E+08            | 3.17.E+08            |
| 1126 | Q9BY44-1  | Eukaryotic translation initiation factor 2A [OS=Homo sapiens]                                      | 42.134        | 1.56.E+08         | 2.04.E+08         | 2.13.E+08         | 2.09.E+08         | 1.69.E+08            | 1.83.E+08            | 1.70.E+08            | 1.51.E+08            | 1.99.E+08            | 1.68.E+08            | 1.99.E+08            | 1.27.E+08            |
| 1127 | Q6DK1     | 60S ribosomal protein L7-like 1 [OS=Homo sapiens]                                                  | 42.114        | 1.44.E+08         | 1.31.E+08         | 1.29.E+08         | 1.43.E+08         | 1.15.E+08            | 1.04.E+08            | 1.32.E+08            | 1.18.E+08            | 1.22.E+08            | 9.83.E+07            | 1.03.E+08            | 1.02.E+08            |
| 1128 | P13987    | CD59 glycoprotein [OS=Homo sapiens]                                                                | 42.058        | 7.32.E+08         | 8.29.E+08         | 8.45.E+08         | 8.35.E+08         | 1.01.E+09            | 1.06.E+09            | 9.99.E+08            | 1.08.E+09            | 6.89.E+08            | 8.22.E+08            | 7.98.E+08            | 7.91.E+08            |
| 1129 | Q02218    | 2-oxoglutarate dehydrogenase, mitochondrial [OS=Homo sapiens]                                      | 41.993        | 9.20.E+07         | 6.04.E+07         | 6.87.E+07         | 6.91.E+07         | 8.00.E+07            | 7.44.E+07            | 7.35.E+07            | 6.58.E+07            | 5.58.E+07            | 6.13.E+07            | 5.78.E+07            | 5.55.E+07            |
| 1130 | O43768    | alpha-endosulfine [OS=Homo sapiens]                                                                | 41.991        | 2.01.E+08         | 1.92.E+08         | 2.23.E+08         | 1.98.E+08         | 2.16.E+08            | 2.30.E+08            | 2.26.E+08            | 2.17.E+08            | 1.69.E+08            | 1.87.E+08            | 2.24.E+08            | 2.15.E+08            |
| 1131 | Q9BQ67    | Glutamate-rich WD repeat-containing protein 1 [OS=Homo sapiens]                                    | 41.79         | 1.82.E+08         | 1.68.E+08         | 1.61.E+08         | 1.88.E+08         | 1.92.E+08            | 1.95.E+08            | 1.92.E+08            | 1.77.E+08            | 1.63.E+08            | 1.64.E+08            | 9.89.E+07            | 1.57.E+08            |
| 1132 | P12081    | Histidine--tRNA ligase, cytoplasmic [OS=Homo sapiens]                                              | 41.748        | 1.05.E+08         | 9.27.E+07         | 9.04.E+07         | 8.67.E+07         | 9.16.E+07            | 1.01.E+08            | 1.03.E+08            | 8.71.E+07            | 1.17.E+08            | 1.15.E+08            | 1.05.E+08            | 1.05.E+08            |
| 1133 | Q9Y696    | Chloride intracellular channel protein 4 [OS=Homo sapiens]                                         | 41.724        | 1.88.E+08         | 2.13.E+08         | 2.08.E+08         | 2.16.E+08         | 2.82.E+08            | 2.73.E+08            | 2.73.E+08            | 2.50.E+08            | 2.27.E+08            | 2.30.E+08            | 2.05.E+08            | 1.90.E+08            |
| 1134 | Q5V179    | annexin A8-like protein 1 [OS=Homo sapiens]                                                        | 41.682        | 1.69.E+08         | 1.68.E+08         | 1.70.E+08         | 1.71.E+08         | 3.42.E+08            | 3.59.E+08            | 3.51.E+08            | 3.81.E+08            | 1.68.E+08            | 1.96.E+08            | 1.84.E+08            | 1.88.E+08            |
| 1135 | O95782    | AP-2 complex subunit alpha-1 [OS=Homo sapiens]                                                     | 41.657        | 5.48.E+07         | 6.25.E+07         | 6.45.E+07         | 5.78.E+07         | 8.26.E+07            | 8.09.E+07            | 8.60.E+07            | 7.82.E+07            | 6.54.E+07            | 7.15.E+07            | 7.58.E+07            | 7.42.E+07            |
| 1136 | Q92769    | Histone deacetylase 2 [OS=Homo sapiens]                                                            | 41.574        | 3.01.E+08         | 2.92.E+08         | 3.04.E+08         | 2.85.E+08         | 2.70.E+08            | 2.81.E+08            | 2.83.E+08            | 2.88.E+08            | 2.92.E+08            | 3.00.E+08            | 2.94.E+08            | 2.80.E+08            |
| 1137 | O15355    | Protein phosphatase 1G [OS=Homo sapiens]                                                           | 41.569        | 2.35.E+08         | 2.04.E+08         | 1.89.E+08         | 2.23.E+08         | 1.47.E+08            | 1.82.E+08            | 1.93.E+08            | 1.71.E+08            | 1.97.E+08            | 1.83.E+08            | 1.76.E+08            | 1.80.E+08            |
| 1138 | Q14232    | Translation initiation factor eIF-2B subunit alpha [OS=Homo sapiens]                               | 41.552        | 3.64.E+07         | 2.75.E+07         | 5.33.E+07         | 7.31.E+07         | 7.83.E+07            | 6.45.E+07            | 1.00.E+08            | 1.03.E+08            | 5.66.E+07            | 1.36.E+08            | 1.04.E+08            | 8.91.E+07            |
| 1139 | P61081    | NEDD8-conjugating enzyme Ubc12 [OS=Homo sapiens]                                                   | 41.468        | 5.44.E+08         | 5.52.E+08         | 5.31.E+08         | 5.57.E+08         | 6.63.E+08            | 6.43.E+08            | 6.54.E+08            | 6.32.E+08            | 4.78.E+08            | 4.66.E+08            | 4.45.E+08            | 4.49.E+08            |
| 1140 | Q14839    | Chromodomain-helicase-DNA-binding protein 4 [OS=Homo sapiens]                                      | 41.417        | 5.95.E+07         | 4.88.E+07         | 4.57.E+07         | 3.82.E+07         | 5.27.E+07            | 5.12.E+07            | 4.53.E+07            | 4.34.E+07            | 3.95.E+07            | 4.44.E+07            | 4.18.E+07            | 4.27.E+07            |
| 1141 | Q9NP72    | Ras-related protein Rab-18 [OS=Homo sapiens]                                                       | 41.353        | 1.35.E+08         | 1.23.E+08         | 1.26.E+08         | 9.02.E+07         | 1.26.E+08            | 1.15.E+08            | 9.63.E+07            | 1.01.E+08            | 1.25.E+08            | 1.21.E+08            | 1.12.E+08            | 1.12.E+08            |
| 1142 | O14828    | Secretory carrier-associated membrane protein 3 [OS=Homo sapiens]                                  | 41.324        | 1.34.E+08         | 1.30.E+08         | 1.39.E+08         | 1.39.E+08         | 9.62.E+07            | 9.72.E+07            | 1.04.E+08            | 9.43.E+07            | 1.07.E+08            | 1.05.E+08            | 9.99.E+07            | 9.56.E+07            |
| 1143 | P51812    | Ribosomal protein S6 kinase alpha-3 [OS=Homo sapiens]                                              | 41.311        | 2.49.E+08         | 2.66.E+08         | 2.65.E+08         | 2.58.E+08         | 2.73.E+08            | 2.70.E+08            | 2.63.E+08            | 2.67.E+08            | 2.85.E+08            | 2.81.E+08            | 2.77.E+08            | 2.52.E+08            |
| 1144 | Q9ULA0    | Aspartyl aminopeptidase [OS=Homo sapiens]                                                          | 41.294        | 4.72.E+07         | 4.78.E+07         | 5.48.E+07         | 4.44.E+07         | 5.89.E+07            | 3.97.E+07            | 4.11.E+07            | 4.44.E+07            | 6.09.E+07            | 6.32.E+07            | 6.95.E+07            | 6.28.E+07            |
| 1145 | O75964    | ATP synthase subunit g, mitochondrial [OS=Homo sapiens]                                            | 41.248        | 4.10.E+08         | 4.19.E+08         | 3.91.E+08         | 4.29.E+08         | 3.64.E+08            | 3.31.E+08            | 3.37.E+08            | 3.52.E+08            | 4.16.E+08            | 4.31.E+08            | 4.47.E+08            | 4.26.E+08            |
| 1146 | Q96IX5    | Up-regulated during skeletal muscle growth protein 5 [OS=Homo sapiens OX=9606 GN=ATP5MD PE=1 SV=1] | 41.114        | 1.98.E+08         | 2.03.E+08         | 2.22.E+08         | 2.07.E+08         | 1.85.E+08            | 1.89.E+08            | 1.79.E+08            | 1.90.E+08            | 1.92.E+08            | 2.18.E+08            | 2.20.E+08            | 2.11.E+08            |
| 1147 | O15372    | Eukaryotic translation initiation factor 3 subunit H [OS=Homo sapiens]                             | 41.072        | 1.98.E+08         | 1.96.E+08         | 2.03.E+08         | 2.17.E+08         | 1.87.E+08            | 2.07.E+08            | 2.01.E+08            | 1.94.E+08            | 2.10.E+08            | 2.12.E+08            | 2.11.E+08            | 2.14.E+08            |
| 1148 | Q9UHD1    | cysteine and histidine-rich domain-containing protein 1 [OS=Homo sapiens]                          | 41.011        | 1.74.E+08         | 1.87.E+08         | 1.93.E+08         | 1.88.E+08         | 1.65.E+08            | 1.70.E+08            | 1.76.E+08            | 1.75.E+08            | 2.18.E+08            | 2.00.E+08            | 2.07.E+08            | 2.08.E+08            |
| 1149 | Q92888-1  | Rho guanine nucleotide exchange factor 1 [OS=Homo sapiens]                                         | 41.009        | 4.38.E+07         | 3.25.E+07         | 4.35.E+07         | 3.43.E+07         | 4.30.E+07            | 3.80.E+07            | 4.10.E+07            | 4.65.E+07            | 3.51.E+07            | 3.63.E+07            | 2.44.E+07            | 2.88.E+07            |
| 1150 | Q15436    | protein transport protein Sec23A [OS=Homo sapiens]                                                 | 40.747        | 7.30.E+07         | 5.12.E+07         | 5.28.E+07         | 6.02.E+07         | 5.08.E+07            | 3.84.E+07            | 5.12.E+07            | 4.51.E+07            | 7.28.E+07            | 5.76.E+07            | 5.24.E+07            | 5.62.E+07            |
| 1151 | Q9P2R3    | Rabkaryrin-5 [OS=Homo sapiens]                                                                     | 40.729        | 5.75.E+07         | 6.54.E+07         | 6.63.E+07         | 7.24.E+07         | 6.08.E+07            | 5.59.E+07            | 5.10.E+07            | 5.26.E+07            | 4.72.E+07            | 3.21.E+07            | 4.65.E+07            | 4.75.E+07            |
| 1152 | P22830-1  | Ferrochelatase, mitochondrial [OS=Homo sapiens]                                                    | 40.46         | 8.53.E+07         | 8.81.E+07         | 8.62.E+07         | 8.50.E+07         | 7.97.E+07            | 7.61.E+07            | 6.85.E+07            | 7.62.E+07            | 7.35.E+07            | 6.39.E+07            | 8.08.E+07            | 7.27.E+07            |
| 1153 | P63279    | SUMO-conjugating enzyme ubc9 [OS=Homo sapiens]                                                     | 40.321        | 2.01.E+08         | 1.73.E+08         | 1.57.E+08         | 1.30.E+08         | 2.03.E+08            | 1.76.E+08            | 2.06.E+08            | 1.80.E+08            | 1.93.E+08            | 1.71.E+08            | 1.57.E+08            | 1.56.E+08            |
| 1154 | Q9BVP2    | Guanine nucleotide-binding protein-like 3 [OS=Homo sapiens]                                        | 40.162        | 9.97.E+07         | 1.35.E+08         | 1.02.E+08         | 1.10.E+08         | 6.25.E+07            | 9.73.E+07            | 8.64.E+07            | 7.28.E+07            | 1.20.E+08            | 1.27.E+08            | 1.10.E+08            | 1.33.E+08            |
| 1155 | Q96CW1    | AP-2 complex subunit mu [OS=Homo sapiens]                                                          | 40.16         | 1.49.E+08         | 9.16.E+07         | 1.14.E+08         | 9.32.E+07         | 1.15.E+08            | 1.24.E+08            | 1.06.E+08            | 1.04.E+08            | 2.09.E+08            | 1.39.E+08            | 1.32.E+08            | 1.18.E+08            |
| 1156 | O15260-1  | surfeit locus protein 4 [OS=Homo sapiens]                                                          | 40.006        | 1.78.E+08         | 1.42.E+08         | 1.48.E+08         | 1.68.E+08         | 1.57.E+08            | 1.51.E+08            | 1.53.E+08            | 1.41.E+08            | 1.66.E+08            | 1.60.E+08            | 1.50.E+08            | 1.44.E+08            |
| 1157 | P49756-1  | RNA-binding protein 25 [OS=Homo sapiens]                                                           | 39.931        | 1.62.E+08         | 1.76.E+08         | 1.66.E+08         | 1.74.E+08         | 2.38.E+08            | 2.45.E+08            | 2.50.E+08            | 2.39.E+08            | 1.64.E+08            | 1.86.E+08            | 1.97.E+08            | 2.05.E+08            |
| 1158 | P61086    | Ubiquitin-conjugating enzyme E2 K [OS=Homo sapiens]                                                | 39.868        | 4.24.E+07         | 5.67.E+06         | 2.68.E+06         | 3.67.E+07         | 1.24.E+07            | 9.06.E+06            | 7.77.E+06            | 7.64.E+06            | 1.41.E+07            | 4.19.E+07            | 1.29.E+07            | 5.25.E+07            |
| 1159 | Q96920-1  | Protein TBRG4 [OS=Homo sapiens]                                                                    | 39.814        | 7.06.E+07         | 5.81.E+07         | 6.12.E+07         | 6.06.E+07         | 5.85.E+07            | 5.89.E+07            | 5.65.E+07            | 5.77.E+07            | 6.65.E+07            | 6.32.E+07            | 5.94.E+07            | 6.36.E+07            |
| 1160 | P53597    | Succinate--CoA ligase (ADP/GDP-forming) subunit alpha, mitochondrial [OS=Homo sapiens]             | 39.806        | 2.81.E+08         | 3.07.E+08         | 2.98.E+08         | 3.06.E+08         | 2.88.E+08            | 2.91.E+08            | 2.82.E+08            | 2.96.E+08            | 3.13.E+08            | 3.10.E+08            | 3.20.E+08            | 3.05.E+08            |
| 1161 | Q8NCW5    | NAD(P)H-hydrate epimerase [OS=Homo sapiens]                                                        | 39.763        | 2.82.E+08         | 2.81.E+08         | 2.93.E+08         | 2.70.E+08         | 2.68.E+08            | 2.77.E+08            | 2.82.E+08            | 2.76.E+08            | 2.63.E+08            | 2.67.E+08            | 2.66.E+08            | 2.66.E+08            |
| 1162 | Q13561-1  | dynactin subunit 2 [OS=Homo sapiens]                                                               | 39.738        | 1.17.E+08         | 1.16.E+08         | 1.21.E+08         | 1.19.E+08         | 1.18.E+08            | 1.16.E+08            | 1.23.E+08            | 1.15.E+08            | 1.08.E+08            | 1.21.E+08            | 9.57.E+07            | 1.23.E+08            |
| 1163 | Q96EL3    | 39S ribosomal protein L53, mitochondrial [OS=Homo sapiens]                                         | 39.713        | 5.45.E+07         | 5.20.E+07         | 4.54.E+07         | 4.94.E+07         | 5.01.E+07            | 5.22.E+07            | 5.77.E+07            | 5.41.E+07            | 4.87.E+07            | 4.87.E+07            | 4.41.E+07            | 4.12.E+07            |
| 1164 | Q13595-1  | Transformer-2 protein homolog alpha [OS=Homo sapiens]                                              | 39.31         | 1.39.E+08         | 1.30.E+08         | 1.47.E+08         | 1.25.E+08         | 1.03.E+08            | 1.28.E+08            | 1.07.E+08            | 1.18.E+08            | 1.43.E+08            | 1.27.E+08            | 1.33.E+08            | 1.17.E+08            |
| 1165 | O75477    | erlin-1 [OS=Homo sapiens]                                                                          | 39.267        | 1.81.E+08         | 1.87.E+08         | 1.92.E+08         | 2.02.E+08         | 1.59.E+08            | 1.74.E+08            | 1.80.E+08            | 1.76.E+08            | 2.06.E+08            | 2.17.E+08            | 2.07.E+08            | 2.09.E+08            |
| 1166 | Q9UNH7-1  | Sorting nexin-6 [OS=Homo sapiens]                                                                  | 39.256        | 3.76.E+07         | 3.58.E+07         | 3.94.E+07         | 3.87.E+07         | 3.89.E+07            | 4.96.E+07            | 2.82.E+07            | 3.31.E+07            | 5.14.E+07            | 4.87.E+07            | 5.49.E+07            | 4.94.E+07            |
| 1167 | A0AVT1-1  | Ubiquitin-like modifier-activating enzyme 6 [OS=Homo sapiens]                                      | 39.09         | 3.56.E+08         | 3.99.E+08         | 3.76.E+08         | 3.58.E+08         | 3.07.E+08            | 3.13.E+08            | 3.16.E+08            | 3.09.E+08            | 3.29.E+08            | 3.05.E+08            | 2.94.E+08            | 2.90.E+08            |

| No.  | Accession | Description                                                                                    | Sum PEP Score | CTRL Abundances_1 | CTRL Abundances_2 | CTRL Abundances_3 | CTRL Abundances_4 | CLDN6-1 Abundances_1 | CLDN6-1 Abundances_2 | CLDN6-1 Abundances_3 | CLDN6-1 Abundances_4 | CLDN6-2 Abundances_1 | CLDN6-2 Abundances_2 | CLDN6-2 Abundances_3 | CLDN6-2 Abundances_4 |
|------|-----------|------------------------------------------------------------------------------------------------|---------------|-------------------|-------------------|-------------------|-------------------|----------------------|----------------------|----------------------|----------------------|----------------------|----------------------|----------------------|----------------------|
| 1168 | O43278    | Kunitz-type protease inhibitor 1 [OS=Homo sapiens]                                             | 39.071        | 1.19.E+08         | 1.22.E+08         | 1.21.E+08         | 1.27.E+08         | 1.06.E+08            | 1.12.E+08            | 1.12.E+08            | 1.10.E+08            | 9.93.E+07            | 9.41.E+07            | 8.83.E+07            | 8.31.E+07            |
| 1169 | Q9HB07    | UPF0160 protein MYG1, mitochondrial [OS=Homo sapiens]                                          | 39.038        | 2.30.E+08         | 2.43.E+08         | 2.38.E+08         | 2.27.E+08         | 2.14.E+08            | 2.07.E+08            | 2.04.E+08            | 2.22.E+08            | 2.49.E+08            | 2.34.E+08            | 2.46.E+08            | 2.01.E+08            |
| 1170 | Q96AC1    | Fermitin family homolog 2 [OS=Homo sapiens]                                                    | 38.933        | 4.88.E+07         | 4.74.E+07         | 5.26.E+07         | 4.90.E+07         | 4.70.E+07            | 6.73.E+07            | 7.30.E+07            | 4.76.E+07            | 5.45.E+07            | 6.45.E+07            | 5.84.E+07            | 5.71.E+07            |
| 1171 | P06454-1  | Prothymosin alpha [OS=Homo sapiens]                                                            | 38.91         | 4.39.E+08         | 3.71.E+08         | 4.43.E+08         | 5.12.E+08         | 4.42.E+08            | 4.77.E+08            | 4.49.E+08            | 3.75.E+08            | 4.54.E+08            | 5.40.E+08            | 5.83.E+08            | 5.57.E+08            |
| 1172 | Q9BQA1    | Methylosome protein 50 [OS=Homo sapiens]                                                       | 38.86         | 2.25.E+08         | 2.19.E+08         | 2.17.E+08         | 2.22.E+08         | 1.67.E+08            | 1.86.E+08            | 1.65.E+08            | 1.70.E+08            | 2.17.E+08            | 1.94.E+08            | 2.03.E+08            | 2.04.E+08            |
| 1173 | Q9NR45    | sialic acid synthase [OS=Homo sapiens]                                                         | 38.791        | 1.24.E+08         | 1.30.E+08         | 1.32.E+08         | 1.29.E+08         | 1.22.E+08            | 1.13.E+08            | 1.18.E+08            | 1.11.E+08            | 1.50.E+08            | 1.46.E+08            | 1.40.E+08            | 1.47.E+08            |
| 1174 | P30419    | glycylpeptide N-tetradecanoyltransferase 1 [OS=Homo sapiens]                                   | 38.683        | 9.38.E+07         | 9.61.E+07         | 1.22.E+08         | 1.01.E+08         | 1.26.E+08            | 9.80.E+07            | 1.05.E+08            | 1.07.E+08            | 1.05.E+08            | 1.11.E+08            | 1.47.E+08            | 1.11.E+08            |
| 1175 | Q13572-1  | Inositol-tetrakisphosphate 1-kinase [OS=Homo sapiens]                                          | 38.619        | 2.45.E+08         | 2.25.E+08         | 2.28.E+08         | 2.39.E+08         | 2.06.E+08            | 1.68.E+08            | 1.66.E+08            | 1.80.E+08            | 2.10.E+08            | 1.82.E+08            | 2.21.E+08            | 2.17.E+08            |
| 1176 | P62316    | Small nuclear ribonucleoprotein Sm D2 [OS=Homo sapiens]                                        | 38.463        | 4.86.E+08         | 4.63.E+08         | 3.79.E+08         | 4.57.E+08         | 4.63.E+08            | 4.35.E+08            | 4.32.E+08            | 3.88.E+08            | 4.25.E+08            | 3.92.E+08            | 3.84.E+08            | 3.73.E+08            |
| 1177 | Q94906-1  | Pre-mRNA-processing factor 6 [OS=Homo sapiens]                                                 | 38.456        | 9.69.E+07         | 9.63.E+07         | 9.85.E+07         | 9.28.E+07         | 1.01.E+08            | 8.99.E+07            | 8.86.E+07            | 7.93.E+07            | 8.92.E+07            | 9.40.E+07            | 9.76.E+07            | 7.77.E+07            |
| 1178 | Q2NL82    | Pre-rRNA-processing protein TSR1 homolog [OS=Homo sapiens]                                     | 38.346        | 1.54.E+08         | 1.48.E+08         | 1.58.E+08         | 1.80.E+08         | 1.28.E+08            | 1.28.E+08            | 1.40.E+08            | 1.30.E+08            | 1.05.E+08            | 9.44.E+07            | 1.01.E+08            | 1.01.E+08            |
| 1179 | P31153    | S-adenosylmethionine synthase isoform type-2 [OS=Homo sapiens]                                 | 38.197        | 1.83.E+08         | 1.89.E+08         | 1.92.E+08         | 1.82.E+08         | 1.66.E+08            | 1.69.E+08            | 1.78.E+08            | 1.80.E+08            | 1.82.E+08            | 1.75.E+08            | 1.69.E+08            | 1.73.E+08            |
| 1180 | Q99426    | tubulin-folding cofactor B [OS=Homo sapiens]                                                   | 38.126        | 1.21.E+08         | 1.07.E+08         | 1.30.E+08         | 1.31.E+08         | 1.06.E+08            | 1.11.E+08            | 1.06.E+08            | 1.06.E+08            | 1.01.E+08            | 1.11.E+08            | 1.05.E+08            | 7.61.E+07            |
| 1181 | P18859    | ATP synthase-coupling factor 6, mitochondrial [OS=Homo sapiens]                                | 38.081        | 3.55.E+08         | 3.33.E+08         | 3.53.E+08         | 2.37.E+08         | 3.35.E+08            | 3.35.E+08            | 3.23.E+08            | 3.45.E+08            | 3.81.E+08            | 3.54.E+08            | 2.87.E+08            | 3.57.E+08            |
| 1182 | Q12849    | G-rich sequence factor 1 [OS=Homo sapiens]                                                     | 38.036        | 1.58.E+08         | 1.23.E+08         | 1.45.E+08         | 1.45.E+08         | 1.61.E+08            | 1.28.E+08            | 1.64.E+08            | 1.26.E+08            | 1.17.E+08            | 1.23.E+08            | 1.23.E+08            | 1.07.E+09            |
| 1183 | Q9H2W6    | 39S ribosomal protein L46, mitochondrial [OS=Homo sapiens]                                     | 37.987        | 6.62.E+07         | 4.06.E+07         | 7.92.E+07         | 4.69.E+07         | 9.78.E+07            | 6.14.E+07            | 7.65.E+07            | 6.77.E+07            | 1.09.E+08            | 1.00.E+08            | 8.27.E+07            | 1.07.E+08            |
| 1184 | P40261    | Nicotinamide N-methyltransferase [OS=Homo sapiens]                                             | 37.976        | 1.15.E+08         | 1.11.E+08         | 1.08.E+08         | 1.01.E+08         | 1.83.E+08            | 1.80.E+08            | 1.77.E+08            | 1.80.E+08            | 6.23.E+07            | 6.32.E+07            | 7.35.E+07            | 7.85.E+07            |
| 1185 | P35270    | Sepiapterin reductase [OS=Homo sapiens]                                                        | 37.741        | 3.82.E+07         | 3.41.E+07         | 7.05.E+07         | 4.20.E+07         | 2.88.E+07            | 5.84.E+06            | 2.01.E+07            | 1.53.E+07            | 1.49.E+07            | 1.56.E+07            | 1.79.E+07            | 1.64.E+07            |
| 1186 | Q3ZCQ8    | Mitochondrial import inner membrane translocase subunit TIM50 [OS=Homo sapiens]                | 37.739        | 1.57.E+08         | 1.33.E+08         | 1.38.E+08         | 1.41.E+08         | 1.35.E+08            | 1.35.E+08            | 1.22.E+08            | 1.12.E+08            | 1.49.E+08            | 1.56.E+08            | 1.35.E+08            | 1.44.E+08            |
| 1187 | P61289-1  | Proteasome activator complex subunit 3 [OS=Homo sapiens]                                       | 37.673        | 2.16.E+08         | 2.10.E+08         | 2.15.E+08         | 2.38.E+08         | 2.18.E+08            | 2.29.E+08            | 2.27.E+08            | 2.19.E+08            | 2.41.E+08            | 2.38.E+08            | 2.24.E+08            | 2.12.E+08            |
| 1188 | P78330    | phosphoserine phosphatase [OS=Homo sapiens]                                                    | 37.605        | 2.15.E+08         | 2.12.E+08         | 1.87.E+08         | 2.05.E+08         | 2.55.E+08            | 2.18.E+08            | 2.49.E+08            | 2.42.E+08            | 2.05.E+08            | 2.03.E+08            | 2.05.E+08            | 2.15.E+08            |
| 1189 | Q13247    | Serine/arginine-rich splicing factor 6 [OS=Homo sapiens]                                       | 37.58         | 6.49.E+08         | 6.97.E+08         | 7.90.E+08         | 7.49.E+08         | 6.49.E+08            | 7.19.E+08            | 7.37.E+08            | 7.57.E+08            | 6.42.E+08            | 7.94.E+08            | 7.93.E+08            | 8.02.E+08            |
| 1190 | P10619    | lysosomal protective protein [OS=Homo sapiens]                                                 | 37.556        | 7.77.E+07         | 1.10.E+08         | 1.21.E+08         | 1.10.E+08         | 8.82.E+07            | 9.04.E+07            | 8.26.E+07            | 8.43.E+07            | 8.95.E+07            | 1.01.E+08            | 9.71.E+07            | 1.04.E+08            |
| 1191 | P63208    | s-phase kinase-associated protein 1 [OS=Homo sapiens]                                          | 37.545        | 1.59.E+08         | 1.46.E+08         | 1.68.E+08         | 1.67.E+08         | 1.68.E+08            | 1.69.E+08            | 1.76.E+08            | 1.75.E+08            | 2.34.E+08            | 2.54.E+08            | 2.49.E+08            | 2.69.E+08            |
| 1192 | Q9NQX3    | Gephyrin [OS=Homo sapiens]                                                                     | 37.509        | 4.40.E+07         | 3.78.E+07         | 2.57.E+07         | 3.71.E+07         | 4.32.E+07            | 3.10.E+07            | 4.53.E+07            | 2.88.E+07            | 2.40.E+07            | 2.93.E+07            | 2.16.E+07            | 1.34.E+07            |
| 1193 | P51398-1  | 28S ribosomal protein S29, mitochondrial [OS=Homo sapiens]                                     | 37.491        | 8.14.E+07         | 9.12.E+07         | 1.23.E+08         | 1.09.E+08         | 7.80.E+07            | 9.63.E+07            | 1.17.E+08            | 1.24.E+08            | 8.51.E+07            | 9.38.E+07            | 7.75.E+07            | 1.44.E+08            |
| 1194 | O75380    | NADH dehydrogenase [ubiquinone] iron-sulfur protein 6, mitochondrial [OS=Homo sapiens]         | 37.286        | 4.33.E+07         | 4.92.E+07         | 1.03.E+08         | 9.73.E+07         | 8.63.E+07            | 7.84.E+07            | 7.62.E+07            | 7.05.E+07            | 1.07.E+08            | 8.12.E+07            | 9.47.E+07            | 9.82.E+07            |
| 1195 | P04062    | glucosylceramidase [OS=Homo sapiens]                                                           | 37.266        | 8.24.E+07         | 5.26.E+07         | 5.30.E+07         | 6.07.E+07         | 4.32.E+07            | 4.26.E+07            | 4.19.E+07            | 4.33.E+07            | 4.62.E+07            | 5.64.E+07            | 4.53.E+07            |                      |
| 1196 | Q16718    | NADH dehydrogenase [ubiquinone] 1 alpha subcomplex subunit 5 [OS=Homo sapiens]                 | 37.256        | 1.12.E+08         | 1.04.E+08         | 1.12.E+08         | 1.10.E+08         | 1.13.E+08            | 1.04.E+08            | 1.20.E+08            | 1.01.E+08            | 1.11.E+08            | 1.14.E+08            | 1.16.E+08            | 1.25.E+08            |
| 1197 | P63165-1  | Small ubiquitin-related modifier 1 [OS=Homo sapiens]                                           | 37.083        | 2.88.E+08         | 2.97.E+08         | 3.05.E+08         | 2.83.E+08         | 2.66.E+08            | 2.65.E+08            | 2.51.E+08            | 2.72.E+08            | 2.76.E+08            | 2.90.E+08            | 2.96.E+08            | 2.90.E+08            |
| 1198 | P07602-1  | Prosaposin [OS=Homo sapiens]                                                                   | 37.082        | 7.71.E+08         | 6.94.E+08         | 7.35.E+08         | 7.85.E+08         | 7.76.E+08            | 7.99.E+08            | 7.77.E+08            | 7.75.E+08            | 5.54.E+08            | 6.90.E+08            | 6.69.E+08            | 6.76.E+08            |
| 1199 | Q6Y7W6-1  | GRB10-interacting GYF protein 2 [OS=Homo sapiens]                                              | 36.969        | 5.94.E+07         | 5.20.E+07         | 2.15.E+08         | 4.85.E+07         | 5.46.E+07            | 4.84.E+07            | 2.92.E+08            | 4.60.E+07            | 4.67.E+07            | 3.08.E+08            | 4.91.E+07            |                      |
| 1200 | O60232    | Sjogren syndrome/scleroderma autoantigen 1 [OS=Homo sapiens]                                   | 36.903        | 1.93.E+08         | 1.57.E+08         | 1.63.E+08         | 1.78.E+08         | 1.12.E+08            | 1.20.E+08            | 1.32.E+08            | 9.32.E+07            | 1.22.E+08            | 1.52.E+08            | 1.28.E+08            | 1.41.E+08            |
| 1201 | O75534    | cold shock domain-containing protein E1 [OS=Homo sapiens]                                      | 36.837        | 1.12.E+08         | 1.13.E+08         | 9.82.E+07         | 1.09.E+08         | 1.21.E+08            | 1.05.E+08            | 1.24.E+08            | 1.22.E+08            | 1.09.E+08            | 1.09.E+08            | 1.09.E+08            | 1.03.E+08            |
| 1202 | P46109    | Crk-like protein [OS=Homo sapiens]                                                             | 36.771        | 3.77.E+08         | 3.99.E+08         | 3.90.E+08         | 3.84.E+08         | 3.30.E+08            | 3.38.E+08            | 3.28.E+08            | 1.33.E+08            | 4.19.E+08            | 3.99.E+08            | 3.98.E+08            | 3.85.E+08            |
| 1203 | P62851    | 40S ribosomal protein S25 [OS=Homo sapiens]                                                    | 36.755        | 2.54.E+09         | 2.54.E+09         | 2.66.E+09         | 2.58.E+09         | 2.54.E+09            | 2.53.E+09            | 2.67.E+09            | 2.79.E+09            | 2.39.E+09            | 2.48.E+09            | 2.50.E+09            | 2.47.E+09            |
| 1204 | Q9NVJ2    | ADP-ribosylation factor-like protein 8B [OS=Homo sapiens]                                      | 36.747        | 1.27.E+08         | 1.35.E+08         | 1.09.E+08         | 8.99.E+07         | 1.34.E+08            | 1.10.E+08            | 8.45.E+07            | 1.01.E+08            | 1.64.E+08            | 1.24.E+08            | 9.16.E+07            | 1.55.E+08            |
| 1205 | Q9NQW6    | Anillin [OS=Homo sapiens]                                                                      | 36.654        | 6.48.E+07         | 5.46.E+07         | 5.67.E+07         | 5.50.E+07         | 5.39.E+07            | 3.02.E+07            | 3.89.E+07            | 3.75.E+07            | 6.57.E+07            | 7.54.E+07            | 5.87.E+07            | 5.74.E+07            |
| 1206 | O95274    | Ly6/PLAUR domain-containing protein 3 [OS=Homo sapiens]                                        | 36.637        | 1.86.E+08         | 1.76.E+08         | 1.81.E+08         | 1.84.E+08         | 2.02.E+08            | 2.11.E+08            | 2.11.E+08            | 2.04.E+08            | 2.58.E+08            | 2.74.E+08            | 2.53.E+08            | 2.52.E+08            |
| 1207 | Q9NTJ3-1  | Structural maintenance of chromosomes protein 4 [OS=Homo sapiens]                              | 36.571        | 8.64.E+07         | 9.30.E+07         | 9.50.E+07         | 9.10.E+07         | 8.52.E+07            | 8.58.E+07            | 8.62.E+07            | 8.80.E+07            | 8.74.E+07            | 7.19.E+07            | 8.43.E+07            | 7.20.E+07            |
| 1208 | P30626-1  | Sorcin [OS=Homo sapiens]                                                                       | 36.522        | 1.69.E+08         | 1.76.E+08         | 2.23.E+08         | 2.17.E+08         | 2.12.E+08            | 2.16.E+08            | 2.35.E+08            | 2.43.E+08            | 1.89.E+08            | 1.83.E+08            | 1.85.E+08            | 2.39.E+08            |
| 1209 | P49257    | Protein ERGIC-53 [OS=Homo sapiens]                                                             | 36.321        | 2.19.E+08         | 1.36.E+08         | 1.51.E+08         | 1.49.E+08         | 1.58.E+08            | 1.24.E+08            | 1.26.E+08            | 1.32.E+08            | 2.11.E+08            | 2.31.E+08            | 1.76.E+08            | 2.27.E+08            |
| 1210 | Q9Y220-1  | Protein SGT1 homolog [OS=Homo sapiens]                                                         | 36.255        | 9.27.E+07         | 8.99.E+07         | 8.19.E+07         | 8.86.E+07         | 8.14.E+07            | 9.34.E+07            | 7.95.E+07            | 6.94.E+07            | 1.14.E+08            | 1.40.E+08            | 5.46.E+07            | 1.41.E+08            |
| 1211 | Q9HAV4    | exportin-5 [OS=Homo sapiens]                                                                   | 36.22         | 1.32.E+08         | 1.18.E+08         | 1.21.E+08         | 1.24.E+08         | 1.22.E+08            | 1.19.E+08            | 1.24.E+08            | 1.12.E+08            | 1.36.E+08            | 1.39.E+08            | 1.51.E+08            | 1.36.E+08            |
| 1212 | Q00688    | peptidyl-prolyl cis-trans isomerase FKBP3 [OS=Homo sapiens]                                    | 36.213        | 1.59.E+08         | 2.06.E+08         | 1.80.E+08         | 1.72.E+08         | 2.09.E+08            | 1.68.E+08            | 2.46.E+08            | 1.51.E+08            | 1.91.E+08            | 2.28.E+08            | 2.02.E+08            | 2.68.E+08            |
| 1213 | Q9Y2Q3-1  | Glutathione S-transferase kappa 1 [OS=Homo sapiens]                                            | 36.078        | 1.27.E+08         | 1.17.E+08         | 1.15.E+08         | 1.13.E+08         | 1.17.E+08            | 1.06.E+08            | 1.11.E+08            | 9.98.E+07            | 1.10.E+08            | 9.91.E+07            | 9.64.E+07            | 9.64.E+07            |
| 1214 | P61006    | Ras-related protein Rab-8A [OS=Homo sapiens]                                                   | 36.027        | 2.21.E+07         | 2.65.E+07         | 9.72.E+07         | 3.09.E+07         | 1.05.E+08            | 1.03.E+08            | 1.05.E+08            | 9.39.E+07            | 3.42.E+07            | 1.05.E+08            | 1.52.E+07            | 1.27.E+08            |
| 1215 | Q53EL6-1  | Programmed cell death protein 4 [OS=Homo sapiens]                                              | 36.027        | 1.53.E+08         | 1.55.E+08         | 1.65.E+08         | 1.67.E+08         | 1.03.E+08            | 1.01.E+08            | 5.68.E+07            | 1.07.E+08            | 1.60.E+08            | 1.63.E+08            | 1.53.E+08            | 1.66.E+08            |
| 1216 | Q9UKK9    | ADP-sugar pyrophosphatase [OS=Homo sapiens]                                                    | 35.981        | 1.86.E+08         | 1.80.E+08         | 1.77.E+08         | 1.81.E+08         | 1.61.E+08            | 1.63.E+08            | 1.64.E+08            | 1.65.E+08            | 2.02.E+08            | 1.92.E+08            | 1.79.E+08            | 2.02.E+08            |
| 1217 | P45973    | chromobox protein homolog 5 [OS=Homo sapiens]                                                  | 35.97         | 1.36.E+08         | 1.38.E+08         | 1.87.E+08         | 1.33.E+08         | 1.61.E+08            | 1.72.E+08            | 1.73.E+08            | 1.79.E+08            | 2.10.E+08            | 2.26.E+08            | 2.23.E+08            | 2.15.E+08            |
| 1218 | O95299    | NADH dehydrogenase [ubiquinone] 1 alpha subcomplex subunit 10, mitochondrial [OS=Homo sapiens] | 35.813        | 1.03.E+08         | 8.35.E+07         | 8.96.E+07         | 9.99.E+07         | 9.61.E+07            | 1.02.E+08            | 9.39.E+07            | 9.78.E+07            | 8.67.E+07            | 9.97.E+07            | 8.68.E+07            | 9.77.E+07            |
| 1219 | O94760-1  | N(G),N(G)-dimethylarginine dimethylaminohydrolase 1 [OS=Homo sapiens]                          | 35.678        | 1.87.E+08         | 1.76.E+08         | 2.06.E+08         | 1.79.E+08         | 2.21.E+08            | 2.24.E+08            | 1.98.E+08            | 2.21.E+08            | 2.32.E+08            | 2.86.E+08            | 2.87.E+08            | 2.43.E+08            |
| 1220 | P19012    | Keratin, type I cytoskeletal 15 [OS=Homo sapiens]                                              | 35.432        | 6.20.E+08         | 6.45.E+08         | 5.98.E+08         | 5.53.E+08         | 5.52.E+08            | 5.27.E+08            | 5.40.E+08            | 5.80.E+08            | 4.12.E+08            | 3.88.E+08            | 3.98.E+08            | 4.00.E+08            |
| 1221 | Q5JTV8    | Torsin-1A-interacting protein 1 [OS=Homo sapiens]                                              | 35.392        | 1.38.E+08         | 1.51.E+08         | 1.67.E+08         | 1.51.E+08         | 5.51.E+07            | 6.12.E+07            | 5.32.E+07            | 5.73.E+07            | 1.27.E+08            | 1.54.E+08            | 1.13.E+08            | 1.47.E+08            |
| 1222 | Q13363-1  | C-terminal-binding protein 1 [OS=Homo sapiens]                                                 | 35.33         | 1.11.E+08         | 8.86.E+07         | 9.60.E+07         | 8.79.E+07         | 9.02.E+07            | 9.26.E+07            | 8.12.E+07            | 9.84.E+07            | 1.05.E+08            | 1.12.E+08            | 1.12.E+08            | 9.43.E+07            |
| 1223 | P62857    | 40S ribosomal protein S28 [OS=Homo sapiens]                                                    | 35.239        | 1.01.E+09         | 1.05.E+09         | 1.06.E+09         | 1.12.E+09         | 9.93.E+08            | 1.10.E+09            | 9.91.E+08            | 1.02.E+09            | 9.52.E+08            | 9.63.E+08            | 1.05.E+09            | 1.02.E+09            |
| 1224 | P47985    | cytochrome b-c1 complex subunit Rieske, mitochondrial [OS=Homo sapiens]                        | 35.163        | 3.11.E+07         |                   | 3.26.E+07         |                   | 2.14.E+07            | 2.12.E+07            | 2.21.E+07            |                      |                      |                      | 2.54.E+07            |                      |

| No.  | Accession | Description                                                                                                     | Sum PEP Score | CTRL Abundances_1 | CTRL Abundances_2 | CTRL Abundances_3 | CTRL Abundances_4 | CLDN6-1 Abundances_1 | CLDN6-1 Abundances_2 | CLDN6-1 Abundances_3 | CLDN6-1 Abundances_4 | CLDN6-2 Abundances_1 | CLDN6-2 Abundances_2 | CLDN6-2 Abundances_3 | CLDN6-2 Abundances_4 |
|------|-----------|-----------------------------------------------------------------------------------------------------------------|---------------|-------------------|-------------------|-------------------|-------------------|----------------------|----------------------|----------------------|----------------------|----------------------|----------------------|----------------------|----------------------|
| 1225 | P59998    | Actin-related protein 2/3 complex subunit 4 [OS=Homo sapiens]                                                   | 35.108        | 4.73.E+08         | 4.75.E+08         | 4.95.E+08         | 4.79.E+08         | 5.19.E+08            | 5.10.E+08            | 5.18.E+08            | 5.43.E+08            | 5.42.E+08            | 5.10.E+08            | 5.08.E+08            | 5.15.E+08            |
| 1226 | Q56VL3    | OCIA domain-containing protein 2 [OS=Homo sapiens]                                                              | 35.066        | 1.95.E+08         | 1.73.E+08         | 1.56.E+08         | 2.03.E+08         | 2.82.E+08            | 3.05.E+08            | 2.79.E+08            | 2.91.E+08            | 3.42.E+08            | 3.28.E+08            | 3.01.E+08            | 3.71.E+08            |
| 1227 | Q13557    | Calcium/calmodulin-dependent protein kinase type II subunit delta [OS=Homo sapiens]                             | 35.066        | 1.29.E+08         | 1.41.E+08         | 1.46.E+08         | 1.80.E+08         | 1.37.E+08            | 1.68.E+08            | 1.85.E+08            | 1.67.E+08            | 1.45.E+08            | 1.41.E+08            | 1.61.E+08            | 1.62.E+08            |
| 1228 | Q86XP3-1  | ATP-dependent RNA helicase DDX42 [OS=Homo sapiens]                                                              | 35.038        | 1.04.E+08         | 1.35.E+08         | 1.47.E+08         | 1.39.E+08         | 6.40.E+07            | 1.43.E+08            | 1.29.E+08            | 1.20.E+08            | 1.44.E+08            | 1.41.E+08            | 1.01.E+08            | 1.10.E+08            |
| 1229 | Q86U42-1  | polyadenylate-binding protein 2 [OS=Homo sapiens]                                                               | 34.992        | 2.31.E+08         | 2.47.E+08         | 2.22.E+08         | 2.50.E+08         | 2.25.E+08            | 1.87.E+08            | 2.05.E+08            | 2.04.E+08            | 2.78.E+08            | 2.49.E+08            | 2.30.E+08            | 2.51.E+08            |
| 1230 | Q99627-1  | COP9 signalosome complex subunit 8 [OS=Homo sapiens]                                                            | 34.961        | 1.22.E+08         | 7.23.E+07         | 8.04.E+07         | 7.16.E+07         | 1.06.E+08            | 8.18.E+07            | 7.70.E+07            | 9.45.E+07            | 1.24.E+08            | 1.25.E+08            | 7.07.E+07            | 1.24.E+08            |
| 1231 | Q9H1E3    | Nuclear ubiquitous casein and cyclin-dependent kinase substrate 1 [OS=Homo sapiens]                             | 34.915        | 9.69.E+07         | 9.75.E+07         | 9.99.E+07         | 1.15.E+08         | 9.49.E+07            | 9.79.E+07            | 1.07.E+08            | 9.72.E+07            | 9.30.E+07            | 8.77.E+07            | 8.59.E+07            | 8.89.E+07            |
| 1232 | P83916    | Chromobox protein homolog 1 [OS=Homo sapiens]                                                                   | 34.907        | 6.91.E+07         | 1.48.E+08         | 7.14.E+07         | 7.23.E+07         | 5.50.E+07            | 5.55.E+07            | 5.86.E+07            | 5.38.E+07            | 1.49.E+08            | 6.45.E+07            | 6.01.E+07            | 5.60.E+07            |
| 1233 | P82979    | SAP domain-containing ribonucleoprotein [OS=Homo sapiens]                                                       | 34.887        | 6.95.E+07         | 7.48.E+07         | 8.35.E+07         | 9.15.E+07         | 8.95.E+07            | 8.75.E+07            | 9.18.E+07            | 1.04.E+08            | 8.01.E+07            | 8.25.E+07            | 8.12.E+07            | 5.44.E+07            |
| 1234 | P53367    | Arfap1in-1 [OS=Homo sapiens]                                                                                    | 34.86         | 7.43.E+07         | 1.23.E+07         | 1.47.E+07         | 1.44.E+07         | 4.59.E+05            | 1.45.E+07            | 1.29.E+07            | 1.08.E+07            | 1.26.E+05            | 1.37.E+07            | 1.32.E+05            |                      |
| 1235 | P11137    | microtubule-associated protein 2 [OS=Homo sapiens]                                                              | 34.843        | 1.05.E+08         | 1.08.E+08         | 8.74.E+07         | 9.31.E+07         | 1.18.E+08            | 9.03.E+07            | 8.28.E+07            | 8.89.E+07            | 5.01.E+07            | 4.27.E+07            | 4.67.E+07            | 4.50.E+07            |
| 1236 | Q96K17-1  | transcription factor BTF3 homolog 4 [OS=Homo sapiens]                                                           | 34.808        | 1.63.E+08         | 1.53.E+08         | 1.33.E+08         | 1.58.E+08         | 1.08.E+08            | 1.35.E+08            | 1.39.E+08            | 1.14.E+08            | 1.59.E+08            | 1.63.E+08            | 1.47.E+08            | 1.77.E+08            |
| 1237 | P80297    | metallothionein-1X [OS=Homo sapiens]                                                                            | 34.721        | 2.31.E+07         | 1.64.E+07         | 2.19.E+07         | 2.60.E+07         | 1.30.E+06            | 4.76.E+06            | 3.71.E+06            | 2.51.E+06            | 1.35.E+06            | 1.51.E+07            | 1.69.E+07            | 1.59.E+07            |
| 1238 | P46379-1  | Large proline-rich protein BAG6 [OS=Homo sapiens]                                                               | 34.719        | 5.52.E+07         | 2.82.E+07         | 4.75.E+07         | 2.69.E+07         | 4.94.E+07            | 2.62.E+07            | 2.56.E+07            | 2.99.E+07            | 3.04.E+07            | 2.83.E+07            | 2.70.E+07            | 2.98.E+07            |
| 1239 | O43324-1  | Eukaryotic translation elongation factor 1 epsilon-1 [OS=Homo sapiens]                                          | 34.608        | 2.82.E+08         | 2.64.E+08         | 2.69.E+08         | 2.76.E+08         | 2.56.E+08            | 2.67.E+08            | 2.43.E+08            | 2.67.E+08            | 2.97.E+08            | 3.17.E+08            | 3.22.E+08            | 3.43.E+08            |
| 1240 | P07919    | Cytochrome b-c1 complex subunit 6, mitochondrial [OS=Homo sapiens]                                              | 34.536        | 1.75.E+08         | 1.75.E+08         | 1.59.E+08         | 1.72.E+08         | 1.21.E+08            | 1.38.E+08            | 1.24.E+08            | 1.20.E+08            | 1.62.E+08            | 1.48.E+08            | 1.56.E+08            | 1.62.E+08            |
| 1241 | Q96AB3    | isochorismatase domain-containing protein 2 [OS=Homo sapiens]                                                   | 34.471        | 6.23.E+07         | 4.55.E+07         | 4.46.E+07         | 5.53.E+07         | 7.20.E+07            | 7.47.E+07            | 5.80.E+07            | 6.63.E+07            | 6.05.E+07            | 4.50.E+07            | 5.89.E+07            | 6.14.E+07            |
| 1242 | P13798    | Acylamino-acid-releasing enzyme [OS=Homo sapiens]                                                               | 34.459        | 1.05.E+08         | 1.02.E+08         | 1.19.E+08         | 1.29.E+08         | 1.49.E+08            | 1.35.E+08            | 1.29.E+08            | 1.39.E+08            | 1.21.E+08            | 1.37.E+08            | 1.27.E+08            | 1.26.E+08            |
| 1243 | Q9UIA9    | exportin-7 [OS=Homo sapiens]                                                                                    | 34.449        | 7.70.E+07         | 8.10.E+07         | 7.95.E+07         | 7.90.E+07         | 6.68.E+07            | 7.18.E+07            | 7.06.E+07            | 6.77.E+07            | 7.87.E+07            | 9.18.E+07            | 8.95.E+07            | 9.08.E+07            |
| 1244 | Q5TFE4    | 5'-nucleotidase domain-containing protein 1 [OS=Homo sapiens]                                                   | 34.386        | 7.26.E+07         | 7.77.E+07         | 6.42.E+07         | 8.94.E+07         | 5.19.E+07            | 5.72.E+07            | 5.45.E+07            | 5.27.E+07            | 7.61.E+07            | 6.27.E+07            | 6.24.E+07            | 6.57.E+07            |
| 1245 | Q8NF37    | Lysophosphatidylcholine acyltransferase 1 [OS=Homo sapiens]                                                     | 34.37         | 8.63.E+07         | 8.64.E+07         | 8.42.E+07         | 6.83.E+07         | 1.07.E+08            | 9.74.E+07            | 1.03.E+08            | 1.02.E+08            | 9.81.E+07            | 1.01.E+08            | 1.01.E+08            | 9.59.E+07            |
| 1246 | Q8N1G4    | Leucine-rich repeat-containing protein 47 [OS=Homo sapiens]                                                     | 34.353        | 8.55.E+07         | 7.20.E+07         | 6.89.E+07         | 8.53.E+07         | 7.50.E+07            | 7.15.E+07            | 6.98.E+07            | 7.02.E+07            | 6.97.E+07            | 6.66.E+07            | 7.69.E+07            | 7.94.E+07            |
| 1247 | P46087    | Probable 28S rRNA (cytosine(4447)-C(5))-methyltransferase [OS=Homo sapiens]                                     | 34.338        | 1.38.E+08         | 1.38.E+08         | 1.46.E+08         | 1.38.E+08         | 1.16.E+08            | 1.10.E+08            | 1.11.E+08            | 1.15.E+08            | 7.11.E+07            | 1.22.E+08            | 1.26.E+08            | 1.22.E+08            |
| 1248 | Q15942    | Zyxin [OS=Homo sapiens]                                                                                         | 34.278        | 7.23.E+07         | 7.37.E+07         | 7.22.E+07         | 7.07.E+07         | 9.56.E+07            | 1.02.E+08            | 9.89.E+07            | 1.05.E+08            | 8.69.E+07            | 8.99.E+07            | 7.57.E+07            | 8.97.E+07            |
| 1249 | Q9UK22    | F-box only protein 2 [OS=Homo sapiens]                                                                          | 34.239        | 7.12.E+07         | 6.04.E+07         | 6.66.E+07         | 7.00.E+07         | 6.28.E+07            | 7.11.E+07            | 6.82.E+07            | 6.53.E+07            | 1.86.E+08            | 1.86.E+08            | 1.91.E+08            | 1.88.E+08            |
| 1250 | P51571    | translocon-associated protein subunit delta [OS=Homo sapiens]                                                   | 34.124        | 5.33.E+08         | 5.27.E+08         | 4.86.E+08         | 5.38.E+08         | 4.50.E+08            | 4.90.E+08            | 4.39.E+08            | 4.49.E+08            | 4.94.E+08            | 4.87.E+08            | 5.08.E+08            | 4.87.E+08            |
| 1251 | Q13126-1  | S-methyl-5'-thioadenosine phosphorylase [OS=Homo sapiens]                                                       | 33.973        | 1.03.E+08         | 7.28.E+07         | 7.81.E+07         | 8.13.E+07         | 1.03.E+08            | 9.72.E+07            | 9.75.E+07            | 8.47.E+07            | 8.86.E+07            | 9.35.E+07            | 9.06.E+07            | 8.83.E+07            |
| 1252 | Q96BS2-1  | calcineurin B homologous protein 3 [OS=Homo sapiens]                                                            | 33.945        | 1.30.E+08         | 1.36.E+08         | 1.35.E+08         | 1.43.E+08         | 1.11.E+08            | 1.02.E+08            | 1.07.E+08            | 1.04.E+08            | 1.60.E+08            | 1.46.E+08            | 1.50.E+08            | 1.62.E+08            |
| 1253 | P61457    | Pterin-4-alpha-carbinolamine dehydratase [OS=Homo sapiens]                                                      | 33.867        | 6.19.E+08         | 6.14.E+08         | 5.85.E+08         | 6.08.E+08         | 5.41.E+08            | 5.09.E+08            | 5.11.E+08            | 6.27.E+08            | 6.76.E+08            | 6.47.E+08            | 5.30.E+08            | 6.24.E+08            |
| 1254 | Q12792-2  | Twinfilin-1 [OS=Homo sapiens]                                                                                   | 33.832        | 8.08.E+07         | 6.23.E+07         | 8.42.E+07         | 7.48.E+07         | 7.26.E+07            | 1.03.E+08            | 6.89.E+07            | 7.66.E+07            | 1.04.E+08            | 9.00.E+07            | 8.25.E+07            | 1.06.E+08            |
| 1255 | Q9Y6G9    | Cytoplasmic dynein 1 light intermediate chain 1 [OS=Homo sapiens]                                               | 33.775        | 6.78.E+07         | 5.71.E+07         | 5.81.E+07         | 6.52.E+07         | 3.99.E+07            | 5.67.E+07            | 5.76.E+07            | 5.22.E+07            | 5.17.E+07            | 5.46.E+07            | 5.23.E+07            | 5.35.E+07            |
| 1256 | P15927-1  | Replication protein A 32 kDa subunit [OS=Homo sapiens]                                                          | 33.762        | 1.26.E+08         | 1.30.E+08         | 1.36.E+08         | 1.29.E+08         | 1.24.E+08            | 1.32.E+08            | 1.32.E+08            | 1.32.E+08            | 1.34.E+08            | 1.21.E+08            | 1.22.E+08            | 1.29.E+08            |
| 1257 | Q92597    | Protein NDRG1 [OS=Homo sapiens]                                                                                 | 33.753        | 5.40.E+06         | 1.30.E+07         | 1.79.E+07         | 1.60.E+07         | 5.70.E+06            | 1.37.E+07            | 1.33.E+07            | 1.18.E+07            | 1.13.E+07            | 3.75.E+07            | 4.52.E+07            | 3.52.E+07            |
| 1258 | O60264    | SWI/SNF-related matrix-associated actin-dependent regulator of chromatin subfamily A member 5 [OS=Homo sapiens] | 33.694        | 2.60.E+08         | 2.79.E+08         | 2.58.E+08         | 2.59.E+08         | 2.39.E+08            | 2.44.E+08            | 2.14.E+08            | 2.34.E+08            | 1.83.E+08            | 2.44.E+08            | 2.46.E+08            | 2.34.E+08            |
| 1259 | Q9BQ39    | ATP-dependent RNA helicase DDX50 [OS=Homo sapiens]                                                              | 33.607        | 5.15.E+07         | 2.35.E+07         | 3.59.E+07         | 3.29.E+07         | 2.62.E+07            | 3.04.E+07            | 4.24.E+07            | 3.32.E+07            | 3.81.E+07            | 2.24.E+07            | 3.15.E+07            | 3.59.E+07            |
| 1260 | Q92526-1  | T-complex protein 1 subunit zeta-2 [OS=Homo sapiens]                                                            | 33.601        |                   |                   |                   |                   |                      |                      |                      |                      |                      |                      |                      |                      |
| 1261 | P37108    | Signal recognition particle 14 kDa protein [OS=Homo sapiens]                                                    | 33.496        | 3.15.E+08         | 2.66.E+08         | 2.45.E+08         | 3.63.E+08         | 3.29.E+08            | 3.10.E+08            | 3.05.E+08            | 2.54.E+08            | 3.51.E+08            | 2.95.E+08            | 3.45.E+08            | 3.51.E+08            |
| 1262 | Q15121    | Astrocytic phosphoprotein PEA-15 [OS=Homo sapiens]                                                              | 33.416        | 6.42.E+07         | 4.66.E+07         | 5.01.E+07         | 5.06.E+07         | 7.04.E+07            | 7.34.E+07            | 7.48.E+07            | 6.57.E+07            | 5.77.E+07            | 5.88.E+07            | 6.50.E+07            | 6.74.E+07            |
| 1263 | P40763    | Signal transducer and activator of transcription 3 [OS=Homo sapiens]                                            | 33.415        | 4.82.E+07         | 4.32.E+07         | 5.71.E+07         | 4.11.E+07         | 5.77.E+07            | 4.90.E+07            | 5.06.E+07            | 3.71.E+07            | 6.80.E+07            | 5.41.E+07            | 4.51.E+07            | 4.48.E+07            |
| 1264 | Q03701    | CCAAT/enhancer-binding protein zeta [OS=Homo sapiens]                                                           | 33.389        | 3.24.E+07         | 3.54.E+07         | 3.03.E+07         | 3.84.E+07         | 2.93.E+07            | 3.06.E+07            | 1.94.E+07            | 2.73.E+07            | 3.12.E+07            | 3.08.E+07            | 2.94.E+07            | 2.78.E+07            |
| 1265 | P61513    | 60S ribosomal protein L37a [OS=Homo sapiens]                                                                    | 33.307        | 3.83.E+08         | 4.02.E+08         | 4.03.E+08         | 4.11.E+08         | 3.63.E+08            | 3.89.E+08            | 3.78.E+08            | 3.77.E+08            | 3.14.E+08            | 3.28.E+08            | 3.30.E+08            | 2.93.E+08            |
| 1266 | P62273-1  | 40S ribosomal protein S29 [OS=Homo sapiens]                                                                     | 33.272        | 1.30.E+09         | 1.39.E+09         | 1.39.E+09         | 1.43.E+09         | 1.29.E+09            | 1.29.E+09            | 1.29.E+09            | 1.32.E+09            | 1.20.E+09            | 1.21.E+09            | 1.26.E+09            | 1.20.E+09            |
| 1267 | Q8TDN6    | Ribosome biogenesis protein BRX1 homolog [OS=Homo sapiens]                                                      | 33.244        | 3.17.E+08         | 3.47.E+08         | 3.48.E+08         | 3.34.E+08         | 2.60.E+08            | 2.27.E+08            | 2.35.E+08            | 2.37.E+08            | 2.66.E+08            | 2.85.E+08            | 2.94.E+08            | 2.99.E+08            |
| 1268 | Q00325-2  | Isoform B of Phosphate carrier protein, mitochondrial [OS=Homo sapiens]                                         | 33.202        | 9.73.E+08         | 9.68.E+08         | 9.68.E+08         | 9.86.E+08         | 9.08.E+08            | 9.32.E+08            | 9.27.E+08            | 9.26.E+08            | 1.05.E+09            | 1.13.E+09            | 1.12.E+09            | 1.12.E+09            |
| 1269 | P24821    | Tenascin [OS=Homo sapiens]                                                                                      | 33.194        |                   | 6.64.E+05         | 1.36.E+06         |                   | 1.10.E+07            | 7.52.E+06            | 1.08.E+07            | 6.60.E+06            | 1.90.E+07            | 2.26.E+07            | 2.05.E+07            | 2.17.E+07            |
| 1270 | Q9Y276    | Mitochondrial chaperone BCS1 [OS=Homo sapiens]                                                                  | 33.154        | 3.47.E+07         | 2.08.E+07         | 4.51.E+07         | 5.77.E+07         | 2.79.E+07            | 4.40.E+07            | 3.62.E+07            | 3.52.E+07            | 3.49.E+07            | 3.52.E+07            | 3.35.E+07            | 3.29.E+07            |
| 1271 | P61923    | Cotator subunit zeta-1 [OS=Homo sapiens]                                                                        | 33.149        | 1.99.E+08         | 1.84.E+08         | 1.95.E+08         | 1.86.E+08         | 1.65.E+08            | 1.62.E+08            | 1.81.E+08            | 1.57.E+08            | 1.96.E+08            | 1.91.E+08            | 1.96.E+08            | 2.23.E+08            |
| 1272 | Q86X76    | Nitrilase homolog 1 [OS=Homo sapiens]                                                                           | 33.052        | 5.76.E+07         | 4.85.E+07         | 5.17.E+07         | 5.41.E+07         | 6.23.E+07            | 5.98.E+07            | 6.06.E+07            | 5.75.E+07            | 5.15.E+07            | 5.75.E+07            | 5.09.E+07            | 5.66.E+07            |
| 1273 | Q9Y5X3    | sorting nexin-5 [OS=Homo sapiens]                                                                               | 33.047        | 7.57.E+07         | 7.07.E+07         | 7.55.E+07         | 8.44.E+07         | 6.42.E+07            | 6.52.E+07            | 6.46.E+07            | 6.09.E+07            | 8.18.E+07            | 8.74.E+07            | 8.57.E+07            | 7.85.E+07            |
| 1274 | Q96EP5    | DAZ-associated protein 1 [OS=Homo sapiens]                                                                      | 32.888        | 2.14.E+08         | 2.21.E+08         | 2.22.E+08         | 2.15.E+08         | 2.02.E+08            | 2.10.E+08            | 2.10.E+08            | 2.18.E+08            | 2.50.E+08            | 2.37.E+08            | 2.33.E+08            | 2.33.E+08            |
| 1275 | Q12769    | nuclear pore complex protein Nup160 [OS=Homo sapiens]                                                           | 32.805        | 4.18.E+07         | 3.93.E+07         | 5.30.E+07         | 5.36.E+07         | 3.90.E+07            | 5.24.E+07            | 5.52.E+07            | 5.20.E+07            | 4.09.E+07            | 5.49.E+07            | 3.73.E+07            | 3.23.E+07            |
| 1276 | Q9Y5V6    | suppressor of tumorigenicity 14 protein [OS=Homo sapiens]                                                       | 32.719        | 5.15.E+07         | 5.05.E+07         | 4.65.E+07         | 5.74.E+07         | 4.46.E+07            | 4.07.E+07            | 4.00.E+07            | 4.22.E+07            | 3.26.E+07            | 3.79.E+07            | 4.14.E+07            | 4.26.E+07            |
| 1277 | Q14008    | Cytoskeleton-associated protein 5 [OS=Homo sapiens]                                                             | 32.647        | 9.35.E+07         | 9.55.E+07         | 9.54.E+07         | 8.15.E+07         | 1.05.E+08            | 9.39.E+07            | 9.15.E+07            | 8.94.E+07            | 8.53.E+07            | 9.87.E+07            | 9.87.E+07            | 9.97.E+07            |
| 1278 | P50416    | Carnitine O-palmitoyltransferase 1, liver isoform [OS=Homo sapiens]                                             | 32.63         | 5.33.E+07         | 6.41.E+07         | 7.20.E+07         | 7.21.E+07         | 8.10.E+07            | 8.02.E+07            | 8.49.E+07            | 8.17.E+07            | 6.17.E+07            | 7.02.E+07            | 5.72.E+07            | 7.12.E+07            |
| 1279 | O95292    | Vesicle-associated membrane protein-associated protein B/C [OS=Homo sapiens]                                    | 32.59         | 1.51.E+08         | 2.08.E+08         | 3.22.E+08         | 2.98.E+08         | 1.67.E+08            | 2.62.E+08            | 3.99.E+07            | 1.75.E+08            | 1.90.E+08            | 3.04.E+08            | 1.91.E+08            | 3.12.E+08            |

| No.  | Accession | Description                                                                         | Sum PEP Score | CTRL Abundances_1 | CTRL Abundances_2 | CTRL Abundances_3 | CTRL Abundances_4 | CLDN6-1 Abundances_1 | CLDN6-1 Abundances_2 | CLDN6-1 Abundances_3 | CLDN6-1 Abundances_4 | CLDN6-2 Abundances_1 | CLDN6-2 Abundances_2 | CLDN6-2 Abundances_3 | CLDN6-2 Abundances_4 |
|------|-----------|-------------------------------------------------------------------------------------|---------------|-------------------|-------------------|-------------------|-------------------|----------------------|----------------------|----------------------|----------------------|----------------------|----------------------|----------------------|----------------------|
| 1280 | Q9NQG5    | regulation of nuclear pre-mRNA domain-containing protein 1B [OS=Homo sapiens]       | 32.565        | 1.13.E+08         | 7.05.E+07         | 6.72.E+07         | 7.09.E+07         | 7.72.E+07            | 7.58.E+07            | 7.56.E+07            | 5.65.E+07            | 4.89.E+07            | 5.12.E+07            | 6.07.E+07            | 5.17.E+07            |
| 1281 | O75312    | Zinc finger protein ZPR1 [OS=Homo sapiens]                                          | 32.484        | 8.62.E+07         | 8.06.E+07         | 8.77.E+07         | 9.18.E+07         | 8.92.E+07            | 6.58.E+07            | 9.63.E+07            | 6.85.E+07            | 8.98.E+07            | 8.19.E+07            | 9.13.E+07            | 9.76.E+07            |
| 1282 | Q96CS3    | FAS-associated factor 2 [OS=Homo sapiens]                                           | 32.395        | 8.20.E+07         | 1.08.E+08         | 7.97.E+07         | 8.86.E+07         | 8.57.E+07            | 1.10.E+08            | 8.04.E+07            | 8.79.E+07            | 1.38.E+08            | 1.57.E+08            | 1.09.E+08            | 1.44.E+08            |
| 1283 | Q6P2E9-1  | Enhancer of mRNA-decapping protein 4 [OS=Homo sapiens]                              | 32.36         | 1.80.E+07         | 1.28.E+07         | 1.66.E+07         | 1.67.E+07         | 1.96.E+07            | 1.78.E+07            | 9.83.E+06            | 3.60.E+06            | 5.87.E+07            | 3.47.E+07            | 7.30.E+07            |                      |
| 1284 | Q9BYD6    | 39S ribosomal protein L1, mitochondrial [OS=Homo sapiens]                           | 32.341        | 2.30.E+08         | 1.93.E+08         | 2.83.E+08         | 2.87.E+08         | 2.05.E+08            | 9.95.E+07            | 2.27.E+08            | 1.11.E+08            | 1.21.E+08            | 2.61.E+08            | 2.34.E+08            | 2.41.E+08            |
| 1285 | Q14684    | Ribosomal RNA processing protein 1 homolog B [OS=Homo sapiens]                      | 32.272        | 5.33.E+07         | 3.72.E+07         | 4.78.E+07         | 5.10.E+07         | 5.93.E+07            | 3.41.E+07            | 4.75.E+07            | 3.89.E+07            | 8.29.E+07            | 5.06.E+07            | 7.52.E+07            | 6.20.E+07            |
| 1286 | O60884    | DnaJ homolog subfamily A member 2 [OS=Homo sapiens]                                 | 32.253        | 5.72.E+07         | 4.11.E+07         | 4.53.E+07         | 5.00.E+07         | 4.05.E+07            | 4.55.E+07            | 4.52.E+07            | 4.10.E+07            | 2.72.E+07            | 3.11.E+07            | 3.04.E+07            | 3.02.E+07            |
| 1287 | Q8WUM0    | Nuclear pore complex protein Nup133 [OS=Homo sapiens]                               | 32.218        | 5.43.E+07         | 4.72.E+07         | 4.94.E+07         | 3.67.E+07         | 4.99.E+07            | 4.28.E+07            | 4.47.E+07            | 4.34.E+07            | 4.76.E+07            | 3.96.E+07            | 2.31.E+07            | 4.26.E+07            |
| 1288 | P43897    | Elongation factor Ts, mitochondrial [OS=Homo sapiens]                               | 32.196        | 5.56.E+07         | 4.64.E+07         | 5.62.E+07         | 5.58.E+07         | 4.45.E+07            | 1.44.E+07            | 3.20.E+07            | 2.51.E+07            | 3.42.E+07            | 4.67.E+07            | 3.99.E+07            | 4.52.E+07            |
| 1289 | Q9BRA2    | Thioredoxin domain-containing protein 17 [OS=Homo sapiens]                          | 32.135        | 4.57.E+08         | 4.71.E+08         | 4.63.E+08         | 4.34.E+08         | 4.91.E+08            | 4.81.E+08            | 4.92.E+08            | 5.02.E+08            | 3.67.E+08            | 3.46.E+08            | 3.38.E+08            | 3.55.E+08            |
| 1290 | P14735    | insulin-degrading enzyme [OS=Homo sapiens]                                          | 32.088        | 1.28.E+08         | 1.25.E+08         | 1.05.E+08         | 1.00.E+08         | 1.38.E+08            | 1.32.E+08            | 1.28.E+08            | 9.80.E+07            | 1.50.E+08            | 1.32.E+08            | 1.41.E+08            | 1.37.E+08            |
| 1291 | Q8WTT2    | Nucleolar complex protein 3 homolog [OS=Homo sapiens]                               | 32.058        | 3.74.E+07         | 3.43.E+07         | 3.97.E+07         | 3.52.E+07         | 3.54.E+07            | 3.54.E+07            | 3.38.E+07            | 3.58.E+07            | 3.71.E+07            | 3.10.E+07            | 3.61.E+07            | 3.66.E+07            |
| 1292 | Q15257-1  | Serine/threonine-protein phosphatase 2A activator [OS=Homo sapiens]                 | 32.026        | 7.79.E+07         | 6.29.E+07         | 6.82.E+07         | 6.62.E+07         | 6.88.E+07            | 6.00.E+07            | 6.52.E+07            | 6.14.E+07            | 8.20.E+07            | 8.81.E+07            | 8.68.E+07            | 9.14.E+07            |
| 1293 | P10644    | cAMP-dependent protein kinase type I-alpha regulatory subunit [OS=Homo sapiens]     | 31.983        | 1.30.E+08         | 1.38.E+08         | 9.29.E+07         | 1.44.E+08         | 1.58.E+08            | 1.64.E+08            | 1.72.E+08            | 1.65.E+08            | 1.53.E+08            | 1.60.E+08            | 1.62.E+08            | 1.67.E+08            |
| 1294 | P11169    | Solute carrier family 2, facilitated glucose transporter member 3 [OS=Homo sapiens] | 31.953        | 6.10.E+08         | 6.08.E+08         | 6.07.E+08         | 6.22.E+08         | 4.21.E+08            | 3.97.E+08            | 3.93.E+08            | 3.94.E+08            | 3.92.E+08            | 3.88.E+08            | 3.93.E+08            | 4.35.E+08            |
| 1295 | P13073    | Cytochrome c oxidase subunit 4 isoform 1, mitochondrial [OS=Homo sapiens]           | 31.9          | 4.49.E+08         | 3.82.E+08         | 3.93.E+08         | 4.86.E+08         | 3.57.E+08            | 4.37.E+08            | 3.66.E+08            | 4.76.E+08            | 4.29.E+08            | 4.29.E+08            | 4.24.E+08            | 4.28.E+08            |
| 1296 | Q96IU4    | Protein ABHD14B [OS=Homo sapiens]                                                   | 31.871        | 2.18.E+08         | 2.09.E+08         | 2.21.E+08         | 2.07.E+08         | 1.86.E+08            | 1.80.E+08            | 1.88.E+08            | 1.81.E+08            | 2.11.E+08            | 2.00.E+08            | 2.08.E+08            | 1.68.E+08            |
| 1297 | P31942    | Heterogeneous nuclear ribonucleoprotein H3 [OS=Homo sapiens]                        | 31.812        | 5.09.E+08         | 5.21.E+08         | 5.16.E+08         | 5.08.E+08         | 5.03.E+08            | 5.14.E+08            | 5.02.E+08            | 5.34.E+08            | 5.71.E+08            | 5.57.E+08            | 5.37.E+08            | 5.43.E+08            |
| 1298 | O00743    | Serine/threonine-protein phosphatase 6 catalytic subunit [OS=Homo sapiens]          | 31.806        | 5.52.E+07         | 5.50.E+07         | 4.99.E+07         | 6.05.E+07         | 5.14.E+07            | 5.63.E+07            | 5.82.E+07            | 5.12.E+07            | 5.15.E+07            | 4.89.E+07            | 5.03.E+07            | 5.47.E+07            |
| 1299 | Q86VI3    | Ras GTPase-activating-like protein IQGAP3 [OS=Homo sapiens]                         | 31.792        | 2.80.E+06         | 1.55.E+06         |                   | 2.67.E+06         |                      |                      | 2.86.E+06            |                      | 1.77.E+06            |                      |                      |                      |
| 1300 | Q06124    | tyrosine-protein phosphatase non-receptor type 11 [OS=Homo sapiens]                 | 31.771        | 5.48.E+07         | 5.67.E+07         | 5.61.E+07         | 6.49.E+07         | 5.31.E+07            | 5.73.E+07            | 6.29.E+07            | 4.99.E+07            | 6.03.E+07            | 6.05.E+07            | 5.78.E+07            | 5.00.E+07            |
| 1301 | Q14203    | Dynactin subunit 1 [OS=Homo sapiens]                                                | 31.695        | 1.43.E+08         | 1.32.E+08         | 1.49.E+08         | 1.36.E+08         | 1.51.E+08            | 1.60.E+08            | 1.44.E+08            | 1.55.E+08            | 1.60.E+08            | 1.68.E+08            | 1.47.E+08            | 1.15.E+08            |
| 1302 | Q9NRX4    | 14 kDa phosphohistidine phosphatase [OS=Homo sapiens]                               | 31.533        | 4.72.E+07         | 2.77.E+07         | 3.16.E+07         | 3.93.E+07         | 2.83.E+07            | 2.66.E+07            | 3.13.E+07            | 2.93.E+07            | 3.11.E+07            | 3.33.E+07            | 4.05.E+07            | 4.67.E+07            |
| 1303 | P61758    | Prefoldin subunit 3 [OS=Homo sapiens]                                               | 31.511        | 1.59.E+08         | 1.54.E+08         | 1.64.E+08         | 1.62.E+08         | 1.47.E+08            | 1.51.E+08            | 1.47.E+08            | 1.52.E+08            | 1.71.E+08            | 1.79.E+08            | 1.76.E+08            | 1.72.E+08            |
| 1304 | P31483    | nucleolysin TIA-1 isoform p40 [OS=Homo sapiens]                                     | 31.433        | 4.08.E+07         | 3.03.E+07         | 2.83.E+07         | 3.33.E+07         | 3.96.E+07            | 3.33.E+07            | 3.30.E+07            | 2.78.E+07            | 3.09.E+07            | 3.73.E+07            | 3.47.E+07            | 3.39.E+07            |
| 1305 | Q13057    | Bifunctional coenzyme A synthase [OS=Homo sapiens]                                  | 31.374        | 2.01.E+08         | 1.86.E+08         | 2.08.E+08         | 1.94.E+08         | 1.72.E+08            | 1.78.E+08            | 1.74.E+08            | 1.88.E+08            | 1.64.E+08            | 2.07.E+08            | 2.00.E+08            | 2.12.E+08            |
| 1306 | Q8IYB3    | Serine/arginine repetitive matrix protein 1 [OS=Homo sapiens]                       | 31.35         | 1.75.E+07         | 3.97.E+07         | 1.32.E+07         | 4.83.E+07         | 3.91.E+07            | 3.35.E+07            | 6.94.E+06            | 4.10.E+07            | 3.66.E+07            | 4.05.E+07            | 1.39.E+07            | 1.40.E+07            |
| 1307 | Q9HDC9    | Adipocyte plasma membrane-associated protein [OS=Homo sapiens]                      | 31.301        | 1.15.E+08         | 1.36.E+08         | 1.34.E+08         | 1.41.E+08         | 8.26.E+07            | 8.48.E+07            | 1.12.E+08            | 1.32.E+08            | 1.56.E+08            | 1.50.E+08            | 1.05.E+08            | 1.61.E+08            |
| 1308 | P52594-1  | Arf-GAP domain and FG repeat-containing protein 1 [OS=Homo sapiens]                 | 31.256        | 3.55.E+07         | 3.07.E+07         | 3.98.E+07         | 3.89.E+07         | 3.50.E+07            | 3.89.E+07            | 3.81.E+07            | 3.38.E+07            | 3.50.E+07            | 3.62.E+07            | 3.53.E+07            | 3.53.E+07            |
| 1309 | P54105    | Methylosome subunit piCln [OS=Homo sapiens]                                         | 31.256        | 6.42.E+07         | 8.27.E+07         | 4.56.E+07         | 8.11.E+07         | 4.68.E+07            | 8.10.E+07            | 8.21.E+07            | 7.77.E+07            | 6.95.E+07            | 7.31.E+07            | 7.31.E+07            | 6.31.E+07            |
| 1310 | P17096-1  | High mobility group protein HMG-I/HMG-Y [OS=Homo sapiens]                           | 31.256        | 2.94.E+08         | 2.78.E+08         | 3.34.E+08         | 3.00.E+08         | 3.02.E+08            | 3.29.E+08            | 3.54.E+08            | 3.77.E+08            | 3.31.E+08            | 4.16.E+08            | 4.25.E+08            | 4.18.E+08            |
| 1311 | Q7RTS7    | Keratin, type II cytoskeletal 74 [OS=Homo sapiens]                                  | 31.14         | 9.66.E+07         | 8.87.E+07         | 6.09.E+07         | 7.74.E+07         | 6.72.E+07            | 4.32.E+07            | 4.44.E+07            | 6.00.E+07            | 8.97.E+07            | 4.31.E+07            | 6.02.E+07            | 5.40.E+07            |
| 1312 | Q15836    | Vesicle-associated membrane protein 3 [OS=Homo sapiens]                             | 31.053        | 7.91.E+07         | 8.73.E+07         | 8.38.E+07         | 8.46.E+07         | 4.81.E+07            | 7.00.E+07            | 6.38.E+07            | 6.95.E+07            | 9.32.E+07            | 9.11.E+07            | 8.64.E+07            | 8.63.E+07            |
| 1313 | Q96AT9    | ribulose-phosphate 3-epimerase [OS=Homo sapiens]                                    | 30.975        | 2.32.E+08         | 2.31.E+08         | 2.48.E+08         | 2.79.E+08         | 1.97.E+08            | 2.55.E+08            | 3.02.E+08            | 2.64.E+08            | 2.71.E+08            | 9.36.E+07            | 2.26.E+08            | 2.86.E+08            |
| 1314 | Q9BXL6-1  | Caspase recruitment domain-containing protein 14 [OS=Homo sapiens]                  | 30.858        | 1.07.E+07         | 2.22.E+07         | 1.66.E+07         | 1.10.E+07         | 3.63.E+07            | 2.64.E+07            | 2.22.E+07            | 2.51.E+07            | 1.75.E+07            | 5.64.E+06            | 2.28.E+07            | 1.32.E+07            |
| 1315 | P14854    | Cytochrome c oxidase subunit 6B1 [OS=Homo sapiens]                                  | 30.835        | 4.06.E+08         | 3.94.E+08         | 3.88.E+08         | 3.96.E+08         | 3.72.E+08            | 3.64.E+08            | 3.64.E+08            | 3.59.E+08            | 2.95.E+08            | 2.95.E+08            | 2.70.E+08            | 2.37.E+08            |
| 1316 | Q9Y277    | Voltage-dependent anion-selective channel protein 3 [OS=Homo sapiens]               | 30.78         | 1.14.E+08         | 1.15.E+08         | 1.12.E+08         | 1.08.E+08         | 9.89.E+07            | 9.67.E+07            | 1.03.E+08            | 1.05.E+08            | 1.27.E+08            | 1.31.E+08            | 1.11.E+08            | 1.19.E+08            |
| 1317 | Q9Y3C8    | ubiquitin-fold modifier-conjugating enzyme 1 [OS=Homo sapiens]                      | 30.694        | 2.38.E+08         | 2.23.E+08         | 2.63.E+08         | 2.35.E+08         | 2.56.E+08            | 2.27.E+08            | 2.20.E+08            | 2.32.E+08            | 2.97.E+08            | 2.96.E+08            | 3.34.E+08            | 2.70.E+08            |
| 1318 | Q15050    | Ribosome biogenesis regulatory protein homolog [OS=Homo sapiens]                    | 30.614        | 9.48.E+07         | 9.73.E+07         | 8.16.E+07         | 3.51.E+07         | 6.83.E+07            | 1.06.E+08            | 1.30.E+08            | 2.12.E+07            | 1.08.E+08            | 7.62.E+07            | 1.31.E+08            | 1.43.E+08            |
| 1319 | O00541-1  | Pescadillo homolog [OS=Homo sapiens]                                                | 30.612        | 1.95.E+08         | 1.94.E+08         | 1.87.E+08         | 1.73.E+08         | 2.16.E+08            | 2.01.E+08            | 2.13.E+08            | 2.22.E+08            | 2.41.E+08            | 2.10.E+08            | 2.02.E+08            | 2.20.E+08            |
| 1320 | O15247    | Chloride intracellular channel protein 2 [OS=Homo sapiens]                          | 30.567        | 9.19.E+06         | 5.48.E+06         | 9.19.E+06         | 4.19.E+06         | 4.69.E+06            | 1.37.E+06            | 2.63.E+05            | 5.76.E+07            | 5.72.E+07            | 5.47.E+07            | 5.71.E+07            |                      |
| 1321 | P14174    | Macrophage Migration inhibitory factor [OS=Homo sapiens]                            | 30.507        | 8.46.E+09         | 8.68.E+09         | 8.77.E+09         | 8.49.E+09         | 7.50.E+09            | 7.42.E+09            | 7.54.E+09            | 7.73.E+09            | 9.56.E+09            | 9.09.E+09            | 8.58.E+09            | 8.39.E+09            |
| 1322 | O75396    | Vesicle-trafficking protein SEC22b [OS=Homo sapiens]                                | 30.498        | 1.36.E+07         | 3.69.E+07         | 4.72.E+07         | 4.83.E+07         | 4.04.E+07            | 1.80.E+07            | 1.68.E+07            | 1.54.E+07            | 2.63.E+07            | 2.38.E+07            | 1.93.E+07            | 2.44.E+07            |
| 1323 | Q52LJ0    | Protein Fam98b [OS=Homo sapiens]                                                    | 30.48         | 2.87.E+07         | 3.09.E+07         | 2.75.E+07         | 2.87.E+07         | 3.06.E+07            | 9.87.E+07            | 2.85.E+07            | 1.00.E+08            | 1.01.E+08            | 9.45.E+07            | 9.16.E+07            | 9.45.E+07            |
| 1324 | O43847-2  | Isoform 2 of Nardilysin [OS=Homo sapiens]                                           | 30.255        | 1.76.E+08         | 1.86.E+08         | 1.88.E+08         | 1.50.E+08         | 1.50.E+08            | 1.73.E+08            | 1.49.E+08            | 1.73.E+08            | 2.04.E+08            | 2.03.E+08            | 2.07.E+08            | 1.73.E+08            |
| 1325 | Q9C0D9    | Ethanolaminophosphotransferase 1 [OS=Homo sapiens]                                  | 30.178        | 1.35.E+08         | 1.27.E+08         | 1.24.E+08         | 1.23.E+08         | 1.20.E+08            | 1.11.E+08            | 1.19.E+08            | 1.06.E+08            | 1.07.E+08            | 1.09.E+08            | 9.62.E+07            | 1.08.E+08            |
| 1326 | Q92900    | Regulator of nonsense transcripts 1 [OS=Homo sapiens]                               | 30.052        | 7.10.E+07         | 9.00.E+07         | 1.09.E+08         | 1.30.E+08         | 1.18.E+08            | 1.20.E+08            | 1.19.E+08            | 1.18.E+08            | 1.27.E+08            | 1.33.E+08            | 9.53.E+07            | 1.28.E+08            |
| 1327 | Q9UBQ5    | Eukaryotic translation initiation factor 3 subunit K [OS=Homo sapiens]              | 29.999        | 1.46.E+08         | 1.49.E+08         | 1.16.E+08         | 1.28.E+08         | 1.16.E+08            | 1.21.E+08            | 1.07.E+08            | 1.17.E+08            | 1.61.E+08            | 1.17.E+08            | 1.17.E+08            | 1.09.E+08            |
| 1328 | Q9UMX0-1  | Ubiquitin-1 [OS=Homo sapiens]                                                       | 29.997        | 5.80.E+07         | 8.40.E+07         | 6.63.E+07         | 5.04.E+07         | 5.70.E+07            | 6.29.E+07            | 5.79.E+07            | 4.83.E+07            | 6.89.E+07            | 7.74.E+07            | 7.75.E+07            | 5.89.E+07            |
| 1329 | Q9BXP3    | Condensin complex subunit 3 [OS=Homo sapiens]                                       | 29.878        | 2.56.E+07         | 5.66.E+07         | 5.70.E+07         | 4.61.E+07         | 5.70.E+07            | 5.57.E+07            | 6.00.E+07            | 2.30.E+07            | 5.74.E+07            | 3.92.E+07            | 4.46.E+07            | 4.77.E+07            |
| 1330 | O75663    | TIP41-like protein [OS=Homo sapiens]                                                | 29.764        | 1.05.E+08         | 9.75.E+07         | 7.93.E+07         | 1.01.E+08         | 8.86.E+07            | 9.95.E+07            | 9.08.E+07            | 9.60.E+07            | 8.47.E+07            | 9.35.E+07            | 8.52.E+07            | 9.66.E+07            |
| 1331 | Q15435    | Protein phosphatase 1 regulatory subunit 7 [OS=Homo sapiens]                        | 29.759        | 2.59.E+07         | 2.17.E+07         | 2.01.E+07         | 2.85.E+07         | 2.70.E+07            | 3.08.E+07            | 4.41.E+07            | 1.85.E+07            | 6.86.E+07            | 4.15.E+07            | 2.18.E+07            | 5.53.E+07            |

| No.  | Accession | Description                                                                               | Sum PEP Score | CTRL Abundances_1 | CTRL Abundances_2 | CTRL Abundances_3 | CTRL Abundances_4 | CLDN6-1 Abundances_1 | CLDN6-1 Abundances_2 | CLDN6-1 Abundances_3 | CLDN6-1 Abundances_4 | CLDN6-2 Abundances_1 | CLDN6-2 Abundances_2 | CLDN6-2 Abundances_3 | CLDN6-2 Abundances_4 |
|------|-----------|-------------------------------------------------------------------------------------------|---------------|-------------------|-------------------|-------------------|-------------------|----------------------|----------------------|----------------------|----------------------|----------------------|----------------------|----------------------|----------------------|
| 1332 | O14617-1  | AP-3 complex subunit delta-1 [OS=Homo sapiens]                                            | 29.723        | 3.11.E+07         | 2.18.E+07         | 2.91.E+07         | 2.97.E+07         | 3.07.E+07            | 2.83.E+07            | 3.05.E+07            | 2.79.E+07            | 1.92.E+07            | 1.78.E+07            | 2.04.E+07            | 2.41.E+07            |
| 1333 | Q92905    | COP9 signalosome complex subunit 5 [OS=Homo sapiens]                                      | 29.691        | 1.39.E+08         | 1.37.E+08         | 1.42.E+08         | 1.46.E+08         | 1.51.E+08            | 1.51.E+08            | 1.55.E+08            | 1.64.E+08            | 1.66.E+08            | 1.66.E+08            | 1.68.E+08            | 1.66.E+08            |
| 1334 | Q8NFF5    | FAD synthase [OS=Homo sapiens]                                                            | 29.674        | 4.17.E+07         | 4.55.E+07         | 3.99.E+07         | 3.64.E+07         | 4.11.E+07            | 3.02.E+07            | 4.37.E+07            | 7.05.E+07            | 3.83.E+07            | 5.17.E+07            | 3.42.E+07            | 3.42.E+07            |
| 1335 | P61024    | cyclin-dependent kinases regulatory subunit 1 [OS=Homo sapiens]                           | 29.647        | 1.50.E+08         | 1.43.E+08         | 1.42.E+08         | 1.39.E+08         | 1.17.E+08            | 8.14.E+07            | 7.42.E+07            | 7.35.E+07            | 1.21.E+08            | 1.08.E+08            | 9.75.E+07            | 9.85.E+07            |
| 1336 | O95232-1  | Luc7-like protein 3 [OS=Homo sapiens]                                                     | 29.617        | 8.03.E+07         | 7.59.E+07         | 7.11.E+07         | 7.24.E+07         | 6.38.E+07            | 6.39.E+07            | 6.43.E+07            | 5.70.E+07            | 6.72.E+07            | 6.76.E+07            | 7.23.E+07            | 6.43.E+07            |
| 1337 | P41223    | Protein BUD31 homolog [OS=Homo sapiens]                                                   | 29.613        | 1.38.E+08         | 1.25.E+08         | 9.22.E+07         | 1.59.E+08         | 1.14.E+08            | 8.04.E+07            | 7.36.E+07            | 1.01.E+08            | 1.10.E+08            | 8.62.E+07            | 9.11.E+07            | 9.23.E+07            |
| 1338 | P35613    | Basigin [OS=Homo sapiens]                                                                 | 29.606        | 1.73.E+08         | 1.93.E+08         | 1.89.E+08         | 2.11.E+08         | 1.81.E+08            | 1.77.E+08            | 1.68.E+08            | 1.84.E+08            | 1.75.E+08            | 2.23.E+08            | 2.27.E+08            | 1.89.E+08            |
| 1339 | Q99436    | Proteasome subunit beta type-7 [OS=Homo sapiens]                                          | 29.548        | 2.41.E+08         | 1.89.E+08         | 1.95.E+08         | 1.76.E+08         | 1.71.E+08            | 1.84.E+08            | 2.09.E+08            | 2.01.E+08            | 1.59.E+08            | 1.78.E+08            | 2.27.E+08            | 2.21.E+08            |
| 1340 | Q9Y3D6    | mitochondrial fission 1 protein [OS=Homo sapiens]                                         | 29.542        | 5.88.E+07         | 4.80.E+07         | 3.97.E+07         | 5.19.E+07         | 6.21.E+07            | 5.43.E+07            | 5.61.E+07            | 4.28.E+07            | 2.44.E+07            | 3.10.E+07            | 2.85.E+07            | 2.81.E+07            |
| 1341 | Q9H0S4    | Probable ATP-dependent RNA helicase DDX47 [OS=Homo sapiens]                               | 29.473        | 1.90.E+07         | 2.77.E+07         | 2.40.E+07         | 2.79.E+07         | 3.47.E+07            | 3.28.E+07            | 3.15.E+07            | 3.36.E+07            | 1.68.E+07            | 1.03.E+07            | 1.00.E+07            | 1.93.E+07            |
| 1342 | P20020-3  | Isoform B of Plasma membrane calcium-transporting ATPase 1 [OS=Homo sapiens]              | 29.458        | 3.32.E+07         | 2.87.E+07         | 4.33.E+07         | 5.38.E+07         | 5.28.E+07            | 2.39.E+07            | 2.02.E+07            | 1.68.E+07            | 2.22.E+07            | 1.85.E+07            | 3.75.E+07            | 1.68.E+07            |
| 1343 | P21912    | Succinate dehydrogenase [ubiquinone] iron-sulfur subunit, mitochondrial [OS=Homo sapiens] | 29.451        | 1.87.E+08         | 2.10.E+08         | 1.68.E+08         | 1.86.E+08         | 1.97.E+08            | 2.00.E+08            | 2.43.E+08            | 2.34.E+08            | 2.10.E+08            | 1.90.E+08            | 1.68.E+08            | 1.96.E+08            |
| 1344 | O95197-3  | Isoform 3 of Reticulon-3 [OS=Homo sapiens]                                                | 29.442        | 2.35.E+08         | 2.46.E+08         | 2.45.E+08         | 2.37.E+08         | 2.52.E+08            | 2.39.E+08            | 2.39.E+08            | 2.25.E+08            | 2.52.E+08            | 2.49.E+08            | 2.50.E+08            | 2.41.E+08            |
| 1345 | O75323-1  | Protein NipSnap homolog 2 [OS=Homo sapiens]                                               | 29.418        | 2.30.E+07         | 1.80.E+07         | 1.15.E+07         | 1.97.E+07         | 5.17.E+06            | 1.69.E+07            | 1.86.E+07            | 1.20.E+07            | 1.27.E+07            | 2.87.E+07            | 1.20.E+07            | 2.17.E+07            |
| 1346 | P35659-1  | Protein DEK [OS=Homo sapiens]                                                             | 29.353        | 1.94.E+08         | 1.92.E+08         | 1.89.E+08         | 1.65.E+08         | 1.75.E+08            | 1.86.E+08            | 1.75.E+08            | 1.82.E+08            | 2.15.E+08            | 1.89.E+08            | 1.86.E+08            | 1.81.E+08            |
| 1347 | Q08209-1  | Serine/threonine-protein phosphatase 2B catalytic subunit alpha isoform [OS=Homo sapiens] | 29.28         | 3.07.E+08         | 3.36.E+08         | 3.55.E+08         | 2.90.E+08         | 3.63.E+08            | 3.86.E+08            | 3.71.E+08            | 3.78.E+08            | 3.92.E+08            | 3.78.E+08            | 3.92.E+08            | 3.65.E+08            |
| 1348 | Q9NX58    | Cell growth-regulating nucleolar protein [OS=Homo sapiens]                                | 29.224        | 2.04.E+07         | 2.17.E+07         | 2.38.E+07         | 2.36.E+07         | 2.40.E+07            | 1.83.E+07            | 2.59.E+07            | 2.26.E+07            | 3.01.E+07            | 3.09.E+07            | 2.74.E+07            | 2.70.E+07            |
| 1349 | P08237    | ATP-dependent 6-phosphofructokinase, muscle type [OS=Homo sapiens]                        | 29.168        | 1.15.E+07         | 7.92.E+06         | 1.05.E+07         | 1.37.E+07         | 1.35.E+07            | 1.31.E+07            | 1.45.E+07            | 1.15.E+07            | 1.30.E+07            | 1.70.E+07            | 1.48.E+07            | 1.43.E+07            |
| 1350 | Q9Y3B4    | Splicing factor 3B subunit 6 [OS=Homo sapiens]                                            | 29.149        | 8.85.E+07         | 9.20.E+07         | 9.59.E+07         | 8.67.E+07         | 8.51.E+07            | 8.88.E+07            | 8.36.E+07            | 8.82.E+07            | 9.51.E+07            | 9.74.E+07            | 1.01.E+08            | 1.02.E+08            |
| 1351 | O60869-1  | Endothelial differentiation-related factor 1 [OS=Homo sapiens]                            | 29.093        | 6.17.E+07         | 6.48.E+07         | 6.95.E+07         | 6.97.E+07         | 6.75.E+07            | 6.86.E+07            | 6.85.E+07            | 6.93.E+07            | 5.85.E+07            | 7.26.E+07            | 7.08.E+07            | 6.72.E+07            |
| 1352 | Q86Y46    | Keratin, type II cytoskeletal 73 [OS=Homo sapiens]                                        | 29.071        |                   | 2.19.E+07         | 1.91.E+07         | 1.90.E+07         | 6.65.E+07            | 6.52.E+07            | 5.67.E+07            | 5.84.E+07            | 1.68.E+07            |                      |                      | 1.35.E+07            |
| 1353 | Q96KR1    | Zinc finger RNA-binding protein [OS=Homo sapiens]                                         | 28.894        | 1.93.E+07         | 1.95.E+07         | 2.08.E+07         | 2.34.E+07         | 2.15.E+07            | 2.14.E+07            | 2.30.E+07            | 2.52.E+07            | 2.00.E+07            | 2.33.E+07            | 2.17.E+07            | 2.21.E+07            |
| 1354 | O75489    | NADH dehydrogenase [ubiquinone] iron-sulfur protein 3, mitochondrial [OS=Homo sapiens]    | 28.824        | 6.89.E+07         | 1.06.E+08         | 1.17.E+08         | 1.82.E+07         | 9.99.E+07            | 4.77.E+07            | 4.73.E+07            | 1.21.E+07            | 1.34.E+08            | 4.88.E+07            | 1.06.E+08            | 6.54.E+07            |
| 1355 | Q9Y5K5-1  | Ubiquitin carboxyl-terminal hydrolase isozyme L5 [OS=Homo sapiens]                        | 28.785        | 9.22.E+07         | 1.01.E+08         | 1.04.E+08         | 9.28.E+07         | 9.32.E+07            | 9.51.E+07            | 9.77.E+07            | 9.42.E+07            | 1.07.E+08            | 1.14.E+08            | 1.10.E+08            | 1.07.E+08            |
| 1356 | Q969V3    | Nicalin [OS=Homo sapiens]                                                                 | 28.723        | 6.68.E+07         | 5.89.E+07         | 6.85.E+07         | 3.37.E+07         | 4.67.E+07            | 5.27.E+07            | 5.17.E+07            | 4.91.E+07            | 6.88.E+07            | 6.08.E+07            | 6.60.E+07            | 6.33.E+07            |
| 1357 | P30038    | Delta-1-pyrroline-5-carboxylate dehydrogenase, mitochondrial [OS=Homo sapiens]            | 28.711        | 8.26.E+07         | 9.01.E+07         | 9.37.E+07         | 9.07.E+07         | 9.19.E+07            | 3.51.E+07            | 3.85.E+07            | 3.35.E+07            | 5.76.E+07            | 7.85.E+07            | 8.29.E+07            | 8.47.E+07            |
| 1358 | O75306-1  | NADH dehydrogenase [ubiquinone] iron-sulfur protein 2, mitochondrial [OS=Homo sapiens]    | 28.689        | 8.54.E+07         | 1.72.E+08         | 1.41.E+08         | 9.59.E+07         | 7.79.E+07            | 8.63.E+07            | 1.40.E+08            | 4.49.E+07            | 1.45.E+08            | 1.13.E+08            | 9.09.E+07            | 1.34.E+08            |
| 1359 | Q13510    | Acid ceramidase [OS=Homo sapiens]                                                         | 28.636        | 1.27.E+08         | 1.42.E+08         | 1.35.E+08         | 1.41.E+08         | 1.78.E+08            | 1.77.E+08            | 1.77.E+08            | 1.54.E+08            | 1.83.E+08            | 1.67.E+08            | 1.71.E+08            | 1.85.E+08            |
| 1360 | Q6PI48    | Aspartate-tRNA ligase, mitochondrial [OS=Homo sapiens]                                    | 28.611        | 1.11.E+08         | 1.05.E+08         | 8.59.E+07         | 9.52.E+07         | 7.46.E+07            | 6.21.E+07            | 6.47.E+07            | 6.41.E+07            | 8.82.E+07            | 7.67.E+07            | 7.89.E+07            | 9.03.E+07            |
| 1361 | P29317    | Ephrin type-A receptor 2 [OS=Homo sapiens]                                                | 28.522        | 1.16.E+08         | 1.05.E+08         | 1.21.E+08         | 8.92.E+07         | 1.47.E+08            | 1.78.E+08            | 1.60.E+08            | 1.53.E+08            | 1.24.E+08            | 9.67.E+07            | 1.29.E+08            | 1.11.E+08            |
| 1362 | O95810    | caveolae-associated protein 2 [OS=Homo sapiens]                                           | 28.51         | 9.06.E+07         | 6.97.E+07         | 7.26.E+07         | 9.10.E+07         | 5.79.E+07            | 5.45.E+07            | 5.37.E+07            | 5.01.E+07            | 1.35.E+08            | 1.14.E+08            | 1.08.E+08            | 1.11.E+08            |
| 1363 | P43307    | Translocon-associated protein subunit alpha [OS=Homo sapiens]                             | 28.506        | 1.14.E+08         | 1.09.E+08         | 1.07.E+08         | 1.24.E+08         | 1.15.E+08            | 1.45.E+08            | 1.19.E+08            | 1.14.E+08            | 1.33.E+08            | 1.33.E+08            | 1.22.E+08            | 1.40.E+08            |
| 1364 | O60762    | Dolichol-phosphate mannosyltransferase subunit 1 [OS=Homo sapiens]                        | 28.442        | 7.53.E+07         | 7.05.E+07         | 6.78.E+07         | 7.08.E+07         | 8.45.E+07            | 8.06.E+07            | 7.75.E+07            | 7.36.E+07            | 9.22.E+07            | 9.05.E+07            | 8.57.E+07            | 9.01.E+07            |
| 1365 | O15511-1  | Actin-related protein 2/3 complex subunit 5 [OS=Homo sapiens]                             | 28.441        | 5.94.E+07         | 6.51.E+07         | 5.94.E+07         | 5.48.E+07         | 7.00.E+07            | 7.40.E+07            | 6.96.E+07            | 6.47.E+07            | 7.83.E+07            | 6.88.E+07            | 7.39.E+07            | 5.02.E+07            |
| 1366 | P30049    | ATP synthase subunit delta, mitochondrial [OS=Homo sapiens]                               | 28.43         | 1.23.E+08         | 1.20.E+08         | 9.84.E+07         | 9.43.E+07         | 1.46.E+08            | 1.52.E+08            | 1.60.E+08            | 1.58.E+08            | 1.42.E+08            | 1.63.E+08            | 1.59.E+08            | 1.48.E+08            |
| 1367 | Q9GZR7    | ATP-dependent RNA helicase DDX24 [OS=Homo sapiens]                                        | 28.409        | 9.23.E+07         | 5.81.E+07         | 8.90.E+07         | 8.60.E+07         | 7.91.E+07            | 7.83.E+07            | 8.16.E+07            | 8.61.E+07            | 8.02.E+07            | 8.10.E+07            | 8.05.E+07            | 7.95.E+07            |
| 1368 | Q12765    | Secernin-1 [OS=Homo sapiens]                                                              | 28.403        | 1.55.E+08         | 1.75.E+08         | 9.87.E+07         | 1.54.E+08         | 1.71.E+08            | 1.73.E+08            | 1.70.E+08            | 1.73.E+08            | 1.93.E+08            | 1.98.E+08            | 1.96.E+08            | 1.86.E+08            |
| 1369 | Q969H8    | Myeloid-derived growth factor [OS=Homo sapiens]                                           | 28.355        | 1.77.E+08         | 1.88.E+08         | 1.83.E+08         | 1.61.E+08         | 1.80.E+08            | 1.76.E+08            | 1.71.E+08            | 1.75.E+08            | 1.60.E+08            | 1.62.E+08            | 1.47.E+08            | 1.69.E+08            |
| 1370 | O75915    | PRA1 family protein 3 [OS=Homo sapiens]                                                   | 28.292        | 7.22.E+07         | 2.71.E+07         | 4.15.E+07         | 3.51.E+07         | 6.01.E+07            | 3.96.E+07            | 5.15.E+07            | 5.36.E+07            | 2.39.E+07            | 3.69.E+07            | 4.38.E+07            | 5.67.E+07            |
| 1371 | Q9UJU6-1  | Drebrin-like protein [OS=Homo sapiens]                                                    | 28.286        | 4.44.E+07         | 5.13.E+07         | 3.83.E+07         | 6.63.E+07         | 7.32.E+07            | 8.28.E+07            | 8.10.E+07            | 4.68.E+07            | 3.93.E+07            | 8.27.E+07            | 3.59.E+07            | 7.10.E+07            |
| 1372 | Q99538    | Legumain [OS=Homo sapiens]                                                                | 28.214        | 7.30.E+07         | 9.26.E+07         | 6.91.E+07         | 1.04.E+08         | 7.79.E+07            | 7.87.E+07            | 7.38.E+07            | 7.15.E+07            | 1.10.E+08            | 1.15.E+08            | 1.23.E+08            | 1.21.E+08            |
| 1373 | O15127    | Secretory carrier-associated membrane protein 2 [OS=Homo sapiens]                         | 28.171        | 1.85.E+08         | 1.84.E+08         | 1.87.E+08         | 1.96.E+08         | 1.47.E+08            | 1.66.E+08            | 1.62.E+08            | 1.66.E+08            | 1.96.E+08            | 2.19.E+08            | 2.21.E+08            | 2.21.E+08            |
| 1374 | O60784    | Target of Myb protein 1 [OS=Homo sapiens]                                                 | 28.123        | 7.26.E+07         | 7.30.E+07         | 7.54.E+07         | 6.99.E+07         | 6.66.E+07            | 7.40.E+07            | 7.09.E+07            | 7.02.E+07            | 7.09.E+07            | 7.36.E+07            | 7.34.E+07            | 7.49.E+07            |
| 1375 | P0C7P4    | Putative cytochrome b-c1 complex subunit Rieske-like protein 1 [OS=Homo sapiens]          | 28.119        | 7.97.E+07         | 9.88.E+07         | 8.23.E+07         | 9.55.E+07         | 8.84.E+07            | 9.76.E+07            | 9.98.E+07            | 8.11.E+07            | 9.47.E+07            | 1.04.E+08            | 9.51.E+07            | 1.03.E+08            |
| 1376 | Q9Y3C6    | Peptidyl-prolyl cis-trans isomerase-like 1 [OS=Homo sapiens]                              | 28.096        | 8.12.E+07         | 8.12.E+07         | 7.78.E+07         | 8.56.E+07         | 6.99.E+07            | 6.66.E+07            | 6.45.E+07            | 6.49.E+07            | 7.68.E+07            | 8.48.E+07            | 8.45.E+07            | 8.35.E+07            |
| 1377 | P29373    | Cellular retinoic acid-binding protein 2 [OS=Homo sapiens]                                | 27.923        | 4.10.E+07         | 4.33.E+07         | 4.65.E+07         | 4.75.E+07         | 3.38.E+07            | 3.80.E+07            | 3.42.E+07            | 3.65.E+07            | 4.72.E+07            | 5.26.E+07            | 5.46.E+07            | 5.85.E+07            |
| 1378 | Q15286    | Ras-related protein Rab-35 [OS=Homo sapiens]                                              | 27.877        | 2.39.E+07         | 2.63.E+07         | 2.88.E+07         | 2.79.E+07         | 2.52.E+07            | 2.42.E+07            | 2.27.E+07            | 2.61.E+07            | 2.35.E+07            | 2.78.E+07            | 2.61.E+07            | 2.49.E+07            |
| 1379 | P15586    | N-acetylglucosamine-6-sulfatase [OS=Homo sapiens]                                         | 27.847        | 1.17.E+08         | 9.87.E+07         | 9.18.E+07         | 1.11.E+08         | 6.02.E+07            | 4.32.E+07            | 6.01.E+07            | 4.64.E+07            | 1.07.E+08            | 1.01.E+08            | 9.99.E+07            | 1.01.E+08            |
| 1380 | Q9BS26    | Endoplasmic reticulum resident protein 44 [OS=Homo sapiens]                               | 27.833        | 6.67.E+07         | 8.27.E+07         | 9.26.E+07         | 9.03.E+07         | 1.14.E+08            | 1.06.E+08            | 1.12.E+08            | 1.12.E+08            | 8.66.E+07            | 8.51.E+07            | 7.43.E+07            | 8.43.E+07            |
| 1381 | Q9UQE7    | Structural maintenance of chromosomes protein 3 [OS=Homo sapiens]                         | 27.773        | 3.67.E+07         | 3.22.E+07         | 3.21.E+07         | 3.37.E+07         | 2.88.E+07            | 3.05.E+07            | 2.81.E+07            | 1.89.E+07            | 2.73.E+07            | 2.86.E+07            | 3.18.E+07            | 2.96.E+07            |
| 1382 | O75821    | Eukaryotic translation initiation factor 3 subunit G [OS=Homo sapiens]                    | 27.765        | 2.94.E+08         | 2.41.E+08         | 2.37.E+08         | 3.06.E+08         | 2.21.E+08            | 2.38.E+08            | 2.47.E+08            | 2.39.E+08            | 3.05.E+08            | 2.63.E+08            | 2.68.E+08            | 2.48.E+08            |

| No.  | Accession | Description                                                                                                      | Sum PEP Score | CTRL Abundances_1 | CTRL Abundances_2 | CTRL Abundances_3 | CTRL Abundances_4 | CLDN6-1 Abundances_1 | CLDN6-1 Abundances_2 | CLDN6-1 Abundances_3 | CLDN6-1 Abundances_4 | CLDN6-2 Abundances_1 | CLDN6-2 Abundances_2 | CLDN6-2 Abundances_3 | CLDN6-2 Abundances_4 |
|------|-----------|------------------------------------------------------------------------------------------------------------------|---------------|-------------------|-------------------|-------------------|-------------------|----------------------|----------------------|----------------------|----------------------|----------------------|----------------------|----------------------|----------------------|
| 1383 | Q9NYL4    | Peptidyl-prolyl cis-trans isomerase FKBP11 [OS=Homo sapiens]                                                     | 27.721        | 1.17.E+08         | 1.12.E+08         | 1.15.E+08         | 1.26.E+08         | 1.03.E+08            | 1.01.E+08            | 1.02.E+08            | 1.12.E+08            | 1.58.E+08            | 1.73.E+08            | 1.59.E+08            | 1.77.E+08            |
| 1384 | Q8NE86    | Calcium uniporter protein, mitochondrial [OS=Homo sapiens]                                                       | 27.705        | 4.58.E+07         | 3.16.E+07         | 2.03.E+07         | 4.04.E+07         | 6.07.E+07            | 3.26.E+07            | 5.40.E+07            | 4.61.E+07            | 6.81.E+07            | 6.37.E+07            | 5.65.E+07            | 5.27.E+07            |
| 1385 | O14925    | Mitochondrial import inner membrane translocase subunit tim23 [OS=Homo sapiens]                                  | 27.696        | 4.81.E+07         | 4.04.E+07         | 4.77.E+07         | 4.16.E+07         | 1.13.E+07            | 9.49.E+06            | 5.67.E+06            | 2.21.E+07            | 3.54.E+07            | 2.81.E+07            | 9.82.E+06            | 2.08.E+07            |
| 1386 | Q9BUK6    | Protein misato homolog 1 [OS=Homo sapiens]                                                                       | 27.615        | 9.30.E+07         | 8.79.E+07         | 8.06.E+07         | 1.02.E+08         | 7.00.E+07            | 7.17.E+07            | 7.09.E+07            | 4.28.E+07            | 7.27.E+07            | 6.69.E+07            | 4.12.E+07            | 7.22.E+07            |
| 1387 | P62847-1  | 40S ribosomal protein S24 [OS=Homo sapiens]                                                                      | 27.552        | 7.56.E+08         | 6.62.E+08         | 6.76.E+08         | 7.34.E+08         | 6.88.E+08            | 6.95.E+08            | 6.73.E+08            | 6.03.E+08            | 6.24.E+08            | 6.06.E+08            | 5.83.E+08            | 5.79.E+08            |
| 1388 | P19784    | casein kinase II subunit alpha' [OS=Homo sapiens]                                                                | 27.498        | 4.88.E+07         | 4.95.E+07         | 4.92.E+06         | 6.28.E+06         | 4.17.E+07            | 4.34.E+06            | 1.88.E+06            | 7.56.E+06            | 5.60.E+07            | 1.12.E+07            | 1.16.E+07            | 1.32.E+07            |
| 1389 | Q07866-1  | Kinesin light chain 1 [OS=Homo sapiens]                                                                          | 27.482        | 1.01.E+08         | 8.48.E+07         | 8.90.E+07         | 9.03.E+07         | 1.01.E+08            | 9.69.E+07            | 9.18.E+07            | 9.80.E+07            | 1.05.E+08            | 1.00.E+08            | 9.73.E+07            | 1.02.E+08            |
| 1390 | P13861    | cAMP-dependent protein kinase type II-alpha regulatory subunit [OS=Homo sapiens]                                 | 27.474        | 1.45.E+07         | 2.09.E+07         | 1.75.E+07         | 7.19.E+06         | 2.39.E+07            | 2.02.E+07            | 2.40.E+07            | 5.23.E+06            | 2.60.E+07            | 2.44.E+07            | 1.80.E+07            | 2.35.E+06            |
| 1391 | P05204    | Non-histone chromosomal protein HMG-17 [OS=Homo sapiens]                                                         | 27.467        | 1.20.E+08         | 1.26.E+08         | 1.34.E+08         | 1.55.E+08         | 1.75.E+08            | 1.66.E+08            | 1.68.E+08            | 1.46.E+08            | 1.21.E+08            | 1.24.E+08            | 1.22.E+08            | 1.23.E+08            |
| 1392 | Q53GS9    | U4/U6.U5 tri-snRNP-associated protein 2 [OS=Homo sapiens]                                                        | 27.389        | 5.90.E+07         | 6.46.E+07         | 5.57.E+07         | 5.88.E+07         | 4.20.E+07            | 5.74.E+07            | 4.98.E+07            | 5.56.E+07            | 6.30.E+07            | 5.79.E+07            | 7.24.E+07            | 7.74.E+07            |
| 1393 | Q9BW60    | Elongation of very long chain fatty acids protein 1 [OS=Homo sapiens]                                            | 27.298        | 5.53.E+07         | 4.63.E+07         | 5.22.E+07         | 5.42.E+07         | 5.71.E+07            | 6.20.E+07            | 5.87.E+07            | 5.67.E+07            | 4.31.E+07            | 5.04.E+07            | 4.58.E+07            | 4.29.E+07            |
| 1394 | Q9NX40    | OcIA domain-containing protein 1 [OS=Homo sapiens]                                                               | 27.275        | 3.70.E+07         | 3.39.E+07         | 3.67.E+07         | 4.54.E+07         | 7.62.E+07            | 7.59.E+07            | 3.50.E+07            | 8.08.E+07            | 7.83.E+07            | 8.84.E+07            | 3.93.E+07            | 8.61.E+07            |
| 1395 | O14787-2  | Isoform 2 of Transportin-2 [OS=Homo sapiens]                                                                     | 27.223        | 7.50.E+06         | 6.18.E+06         | 7.33.E+06         | 5.25.E+06         | 7.61.E+06            | 7.61.E+06            | 7.61.E+06            | 7.87.E+06            | 1.14.E+07            | 1.14.E+07            | 1.07.E+07            | 1.07.E+07            |
| 1396 | Q96G03    | Phosphoglucutase-2 [OS=Homo sapiens]                                                                             | 27.196        | 6.86.E+07         | 5.78.E+07         | 6.36.E+07         | 6.31.E+07         | 4.07.E+07            | 4.73.E+07            | 5.94.E+07            | 6.60.E+07            | 6.17.E+07            | 6.50.E+07            | 6.40.E+07            | 6.16.E+07            |
| 1397 | P55036-1  | 26S proteasome non-ATPase regulatory subunit 4 [OS=Homo sapiens]                                                 | 27.167        | 1.46.E+08         | 2.30.E+08         | 2.20.E+08         | 2.44.E+08         | 2.43.E+08            | 2.28.E+08            | 1.98.E+08            | 2.06.E+08            | 3.28.E+08            | 2.50.E+08            | 2.47.E+08            | 2.53.E+08            |
| 1398 | Q7L014    | probable ATP-dependent RNA helicase DDX46 [OS=Homo sapiens]                                                      | 27.164        | 8.15.E+07         | 8.84.E+07         | 8.10.E+07         | 8.55.E+07         | 7.33.E+07            | 7.43.E+07            | 7.61.E+07            | 7.22.E+07            | 6.40.E+07            | 8.07.E+07            | 7.28.E+07            | 7.90.E+07            |
| 1399 | P07305    | Histone H1.0 [OS=Homo sapiens]                                                                                   | 27.109        | 3.00.E+08         | 3.20.E+08         | 3.23.E+08         | 3.26.E+08         | 2.53.E+08            | 2.74.E+08            | 2.67.E+08            | 2.79.E+08            | 2.83.E+08            | 3.06.E+08            | 3.13.E+08            | 2.98.E+08            |
| 1400 | Q96JY6-1  | PDZ and LIM domain protein 2 [OS=Homo sapiens]                                                                   | 27.105        | 8.15.E+07         | 1.43.E+08         | 8.10.E+07         | 1.36.E+08         | 1.67.E+08            | 1.04.E+08            | 1.71.E+08            | 1.11.E+08            | 1.24.E+08            | 1.50.E+08            | 1.47.E+08            | 1.38.E+08            |
| 1401 | P00966    | Argininosuccinate synthase [OS=Homo sapiens]                                                                     | 27.033        | 2.31.E+07         | 2.15.E+07         | 2.11.E+07         | 2.22.E+07         | 5.41.E+07            | 5.45.E+07            | 4.55.E+07            | 4.91.E+07            | 1.32.E+07            | 1.21.E+07            | 1.12.E+07            | 1.19.E+07            |
| 1402 | P48637    | glutathione synthetase [OS=Homo sapiens]                                                                         | 27.009        | 2.21.E+08         | 2.20.E+08         | 2.14.E+08         | 2.18.E+08         | 2.24.E+08            | 2.18.E+08            | 2.27.E+08            | 2.30.E+08            | 2.26.E+08            | 2.31.E+08            | 2.31.E+08            | 2.31.E+08            |
| 1403 | P57740    | Nuclear pore complex protein Nup107 [OS=Homo sapiens]                                                            | 27.002        | 2.82.E+07         | 2.93.E+07         | 3.04.E+07         | 3.24.E+07         | 2.78.E+07            | 2.26.E+07            | 2.78.E+07            | 2.53.E+07            | 2.87.E+07            | 2.88.E+07            | 3.15.E+07            | 2.82.E+07            |
| 1404 | Q5RI15-1  | Cytochrome c oxidase protein 20 homolog [OS=Homo sapiens]                                                        | 26.993        | 6.44.E+07         | 6.10.E+07         | 9.56.E+07         | 7.08.E+07         | 6.04.E+07            | 9.09.E+07            | 8.74.E+07            | 9.53.E+07            | 9.54.E+07            | 1.32.E+08            | 1.30.E+08            | 1.17.E+08            |
| 1405 | P21926    | CD9 antigen [OS=Homo sapiens]                                                                                    | 26.929        | 3.29.E+08         | 2.98.E+08         | 2.86.E+08         | 2.89.E+08         | 2.85.E+08            | 2.84.E+08            | 2.81.E+08            | 2.68.E+08            | 2.71.E+08            | 2.57.E+08            | 2.40.E+08            | 2.35.E+08            |
| 1406 | P10606    | Cytochrome c oxidase subunit 5B, mitochondrial [OS=Homo sapiens]                                                 | 26.919        | 4.28.E+08         | 4.51.E+08         | 3.66.E+08         | 3.91.E+08         | 4.06.E+08            | 3.76.E+08            | 4.11.E+08            | 4.26.E+08            | 3.50.E+08            | 3.38.E+08            | 3.20.E+08            | 3.15.E+08            |
| 1407 | Q9HCN8    | Stromal cell-derived factor 2-like protein 1 [OS=Homo sapiens]                                                   | 26.907        | 9.41.E+07         | 1.06.E+08         | 6.06.E+07         | 9.87.E+07         | 1.03.E+08            | 9.76.E+07            | 9.77.E+07            | 1.12.E+08            | 8.02.E+07            | 8.34.E+07            | 9.61.E+07            | 8.15.E+07            |
| 1408 | Q96I59    | probable asparagine--tRNA ligase, mitochondrial [OS=Homo sapiens]                                                | 26.856        | 1.99.E+07         | 2.73.E+07         | 2.39.E+07         | 2.25.E+07         | 2.53.E+07            | 2.63.E+07            | 3.05.E+07            | 2.55.E+07            | 2.80.E+07            | 3.53.E+07            | 2.60.E+07            | 3.54.E+07            |
| 1409 | P09110-1  | 3-ketoacyl-CoA thiolase, peroxisomal [OS=Homo sapiens]                                                           | 26.786        | 3.18.E+07         | 2.01.E+07         | 2.41.E+07         | 2.25.E+07         | 5.30.E+07            | 2.33.E+07            | 2.35.E+07            | 4.71.E+07            | 2.38.E+07            | 2.03.E+07            | 4.87.E+07            | 3.35.E+07            |
| 1410 | Q9P1F3    | Costars family protein ABRACL [OS=Homo sapiens]                                                                  | 26.773        | 1.11.E+08         | 8.86.E+07         | 9.77.E+07         | 1.16.E+08         | 1.32.E+08            | 1.23.E+08            | 1.29.E+08            | 1.05.E+08            | 6.38.E+07            | 7.75.E+07            | 6.70.E+07            | 7.00.E+07            |
| 1411 | Q9BYG3    | MKI67 FHA domain-interacting nucleolar phosphoprotein [OS=Homo sapiens]                                          | 26.742        | 4.55.E+07         | 4.40.E+07         | 3.16.E+07         | 3.66.E+07         | 3.73.E+07            | 3.70.E+07            | 4.48.E+07            | 4.09.E+07            | 3.15.E+07            | 3.99.E+07            | 4.24.E+07            | 2.94.E+07            |
| 1412 | O00442    | RNA 3'-terminal phosphate cyclase [OS=Homo sapiens]                                                              | 26.729        | 4.54.E+07         | 2.45.E+07         | 4.47.E+07         | 2.86.E+07         | 3.72.E+07            | 4.76.E+07            | 4.78.E+07            | 4.48.E+07            | 4.01.E+07            | 3.89.E+07            | 3.91.E+07            | 3.90.E+07            |
| 1413 | O95347-1  | structural maintenance of chromosomes protein 2 [OS=Homo sapiens]                                                | 26.678        | 2.35.E+07         | 2.82.E+07         | 2.80.E+07         | 2.99.E+07         | 9.94.E+06            | 2.54.E+07            | 8.61.E+06            | 2.48.E+07            | 1.24.E+07            | 1.72.E+07            | 9.57.E+06            | 1.77.E+07            |
| 1414 | P51116    | Fragile X mental retardation syndrome-related protein 2 [OS=Homo sapiens]                                        | 26.677        | 4.90.E+07         | 4.77.E+07         | 4.62.E+07         | 5.66.E+07         | 3.69.E+07            | 4.52.E+07            | 3.94.E+07            | 4.38.E+07            | 2.46.E+07            | 2.26.E+07            | 2.58.E+07            | 2.81.E+07            |
| 1415 | Q7Z7H5    | Transmembrane emp24 domain-containing protein 4 [OS=Homo sapiens]                                                | 26.648        | 6.46.E+07         | 5.41.E+07         | 1.20.E+08         | 4.88.E+07         | 5.41.E+07            | 5.84.E+07            | 5.65.E+07            | 5.85.E+07            | 4.72.E+07            | 5.03.E+07            | 6.32.E+07            | 4.97.E+07            |
| 1416 | Q9UPY5    | Cystine/glutamate transporter [OS=Homo sapiens]                                                                  | 26.582        | 9.80.E+07         | 9.49.E+07         | 8.89.E+07         | 9.31.E+07         | 1.42.E+08            | 1.32.E+08            | 1.27.E+08            | 1.14.E+08            | 6.54.E+07            | 6.00.E+07            | 6.01.E+07            | 5.87.E+07            |
| 1417 | P34949    | mannose-6-phosphate isomerase [OS=Homo sapiens]                                                                  | 26.568        | 5.65.E+07         | 5.57.E+07         | 2.34.E+07         | 4.21.E+07         | 3.76.E+07            | 2.04.E+07            | 2.07.E+07            | 1.46.E+07            | 6.62.E+07            | 5.93.E+07            | 4.68.E+07            | 2.05.E+07            |
| 1418 | Q8TD19    | Serine/threonine-protein kinase Nek9 [OS=Homo sapiens]                                                           | 26.534        | 3.49.E+07         | 3.35.E+07         | 5.54.E+07         | 4.51.E+07         | 3.77.E+07            | 6.66.E+07            | 6.47.E+07            | 5.63.E+07            | 4.06.E+07            | 5.73.E+07            | 5.03.E+07            | 5.60.E+07            |
| 1419 | O43504    | Regulator complex protein LAMTOR5 [OS=Homo sapiens]                                                              | 26.467        | 6.52.E+07         | 6.07.E+07         | 6.31.E+07         | 5.62.E+07         | 4.44.E+07            | 4.38.E+07            | 4.98.E+07            | 4.87.E+07            | 5.94.E+07            | 5.66.E+07            | 5.62.E+07            | 5.31.E+07            |
| 1420 | P26885    | Peptidyl-prolyl cis-trans isomerase FKBP2 [OS=Homo sapiens]                                                      | 26.357        | 2.38.E+08         | 2.12.E+08         | 1.49.E+08         | 1.70.E+08         | 1.77.E+08            | 1.68.E+08            | 1.75.E+08            | 1.17.E+08            | 1.78.E+08            | 1.69.E+08            | 2.02.E+08            | 1.94.E+08            |
| 1421 | Q99459    | Cell division cycle 5-like protein [OS=Homo sapiens]                                                             | 26.357        | 7.94.E+07         | 7.78.E+07         | 8.74.E+07         | 9.08.E+07         | 7.73.E+07            | 8.68.E+07            | 8.82.E+07            | 7.74.E+07            | 8.16.E+07            | 8.96.E+07            | 8.97.E+07            | 9.87.E+07            |
| 1422 | P52888    | thimet oligopeptidase [OS=Homo sapiens]                                                                          | 26.318        | 6.78.E+07         | 6.93.E+07         | 7.76.E+07         | 9.03.E+07         | 6.39.E+07            | 5.25.E+07            | 7.27.E+07            | 6.95.E+07            | 5.55.E+07            | 6.24.E+07            | 8.45.E+07            | 8.85.E+07            |
| 1423 | O14929    | histone acetyltransferase type B catalytic subunit [OS=Homo sapiens]                                             | 26.317        | 2.12.E+07         | 2.08.E+07         | 3.02.E+07         | 2.77.E+07         | 2.55.E+07            | 2.84.E+07            | 3.27.E+07            | 2.96.E+07            | 2.53.E+07            | 3.33.E+07            | 3.14.E+07            | 3.18.E+07            |
| 1424 | Q9NP97    | Dynein light chain roadblock-type 1 [OS=Homo sapiens]                                                            | 26.307        | 2.28.E+08         | 2.39.E+08         | 2.55.E+08         | 2.52.E+08         | 2.65.E+08            | 2.74.E+08            | 2.78.E+08            | 2.79.E+08            | 2.78.E+08            | 3.01.E+08            | 2.98.E+08            | 3.01.E+08            |
| 1425 | Q9Y2V2    | Calcium-regulated heat-stable protein 1 [OS=Homo sapiens]                                                        | 26.276        | 5.77.E+07         | 6.85.E+07         | 6.63.E+07         | 6.27.E+07         | 7.22.E+07            | 7.30.E+07            | 7.71.E+07            | 7.39.E+07            | 9.93.E+07            | 1.08.E+08            | 1.04.E+08            | 1.07.E+08            |
| 1426 | O14745    | Na(+)/H(+) exchange regulatory cofactor NHE-RF1 [OS=Homo sapiens]                                                | 26.266        | 1.01.E+08         | 1.18.E+08         | 1.16.E+08         | 1.24.E+08         | 1.06.E+08            | 1.13.E+08            | 1.18.E+08            | 1.22.E+08            | 8.81.E+07            | 9.12.E+07            | 8.94.E+07            | 8.94.E+07            |
| 1427 | Q95470    | sphingosine-1-phosphate lyase 1 [OS=Homo sapiens]                                                                | 26.26         | 7.14.E+07         | 7.03.E+07         | 6.34.E+07         | 8.28.E+07         | 6.50.E+07            | 6.95.E+07            | 7.16.E+07            | 6.77.E+07            | 7.01.E+07            | 7.32.E+07            | 7.11.E+07            | 7.14.E+07            |
| 1428 | P60983    | glia maturation factor beta [OS=Homo sapiens]                                                                    | 26.215        | 1.56.E+07         | 1.21.E+07         | 1.00.E+07         | 1.42.E+07         | 4.72.E+06            | 9.76.E+06            | 3.03.E+06            | 6.55.E+06            | 7.85.E+06            | 1.52.E+07            | 1.48.E+07            | 1.48.E+07            |
| 1429 | O94919    | endonuclease domain-containing 1 protein [OS=Homo sapiens]                                                       | 26.17         | 9.86.E+07         | 9.08.E+07         | 9.58.E+07         | 9.73.E+07         | 2.73.E+07            | 2.45.E+07            | 2.62.E+07            | 2.42.E+07            | 2.25.E+07            | 9.35.E+07            | 1.02.E+08            | 2.30.E+07            |
| 1430 | Q96HN2    | Adenosylhomocysteinase 3 [OS=Homo sapiens]                                                                       | 26.096        | 6.38.E+07         | 6.53.E+07         | 6.94.E+07         | 6.39.E+07         | 6.72.E+07            | 6.15.E+07            | 6.52.E+07            | 7.09.E+07            | 5.07.E+07            | 8.03.E+07            | 7.68.E+07            | 8.26.E+07            |
| 1431 | Q8WZ82    | Esterase OVCA2 [OS=Homo sapiens]                                                                                 | 26.083        | 1.45.E+07         | 1.61.E+07         | 1.73.E+07         | 1.55.E+07         | 1.84.E+07            | 2.13.E+07            | 1.86.E+07            | 1.84.E+07            | 1.06.E+07            | 1.15.E+07            | 1.02.E+07            | 8.36.E+06            |
| 1432 | Q9NXH9-1  | tRNA (guanine(26)-N(2))-dimethyltransferase [OS=Homo sapiens]                                                    | 26.076        | 3.01.E+07         | 3.10.E+07         | 2.94.E+07         | 3.03.E+07         | 2.45.E+07            | 3.13.E+07            | 2.85.E+07            | 2.50.E+07            | 2.48.E+07            | 3.01.E+07            | 2.74.E+07            | 2.90.E+07            |
| 1433 | Q7Z7H8    | 39S ribosomal protein L10, mitochondrial [OS=Homo sapiens]                                                       | 26.023        | 2.65.E+07         | 2.01.E+07         | 1.96.E+07         | 2.29.E+07         | 2.27.E+07            | 2.59.E+07            | 2.14.E+07            | 1.86.E+07            | 1.97.E+07            | 1.96.E+07            | 1.78.E+07            | 1.77.E+07            |
| 1434 | Q5T1J5    | Putative coiled-coil-helix-coiled-coil-helix domain-containing protein CHCHD2P9, mitochondrial [OS=Homo sapiens] | 26.007        | 5.89.E+07         | 6.17.E+07         | 6.71.E+07         | 6.01.E+07         | 3.88.E+07            | 4.27.E+07            | 4.38.E+07            | 4.40.E+07            | 5.08.E+07            | 6.29.E+07            | 6.40.E+07            | 6.30.E+07            |

Supplemental Data 1. List of identified proteins

| No.  | Accession | Description                                                                                    | Sum PEP Score | CTRL Abundances_1 | CTRL Abundances_2 | CTRL Abundances_3 | CTRL Abundances_4 | CLDN6-1 Abundances_1 | CLDN6-1 Abundances_2 | CLDN6-1 Abundances_3 | CLDN6-1 Abundances_4 | CLDN6-2 Abundances_1 | CLDN6-2 Abundances_2 | CLDN6-2 Abundances_3 | CLDN6-2 Abundances_4 |
|------|-----------|------------------------------------------------------------------------------------------------|---------------|-------------------|-------------------|-------------------|-------------------|----------------------|----------------------|----------------------|----------------------|----------------------|----------------------|----------------------|----------------------|
| 1435 | P24941-1  | cyclin-dependent kinase 2 [OS=Homo sapiens]                                                    | 25.978        | 3.35.E+07         | 3.90.E+07         | 4.42.E+07         | 3.45.E+07         | 4.90.E+07            | 2.63.E+07            | 3.95.E+07            | 3.04.E+07            | 1.14.E+07            | 3.89.E+07            | 4.93.E+07            | 3.38.E+07            |
| 1436 | P35244    | Replication protein A 14 kDa subunit [OS=Homo sapiens]                                         | 25.922        | 1.01.E+08         | 8.97.E+07         | 9.31.E+07         | 1.06.E+08         | 1.01.E+08            | 9.67.E+07            | 9.46.E+07            | 1.00.E+08            | 8.83.E+07            | 8.47.E+07            | 9.38.E+07            | 9.79.E+07            |
| 1437 | Q9UL15-1  | BAG family molecular chaperone regulator 5 [OS=Homo sapiens]                                   | 25.918        | 4.25.E+07         | 1.76.E+07         | 1.99.E+07         | 1.89.E+07         | 1.81.E+07            | 1.88.E+07            | 1.91.E+07            | 1.14.E+07            | 2.01.E+07            | 2.03.E+07            | 2.09.E+07            | 2.19.E+07            |
| 1438 | Q9Y3B3-1  | Transmembrane emp24 domain-containing protein 7 [OS=Homo sapiens]                              | 25.83         | 1.41.E+08         | 1.43.E+08         | 1.47.E+08         | 1.39.E+08         | 1.37.E+08            | 1.39.E+08            | 1.30.E+08            | 1.39.E+08            | 1.43.E+08            | 1.43.E+08            | 1.35.E+08            | 1.34.E+08            |
| 1439 | Q9Y5L0-2  | transportin-3 [OS=Homo sapiens]                                                                | 25.775        | 3.90.E+07         | 3.12.E+07         | 3.20.E+07         | 2.91.E+07         | 3.56.E+07            | 3.07.E+07            | 3.43.E+07            | 3.35.E+07            | 3.02.E+07            | 3.22.E+07            | 3.38.E+07            | 3.77.E+07            |
| 1440 | Q13144    | Translation initiation factor eIF-2B subunit epsilon [OS=Homo sapiens]                         | 25.669        | 4.32.E+07         | 4.41.E+07         | 4.26.E+07         | 4.27.E+07         | 3.38.E+07            | 5.07.E+07            | 3.99.E+07            | 3.02.E+07            | 4.87.E+07            | 5.40.E+07            | 5.04.E+07            | 5.63.E+07            |
| 1441 | O43592    | Exportin-T [OS=Homo sapiens]                                                                   | 25.667        | 1.39.E+08         | 1.42.E+08         | 1.17.E+08         | 1.40.E+08         | 1.37.E+08            | 7.97.E+07            | 1.52.E+08            | 1.66.E+08            | 1.48.E+08            | 1.43.E+08            | 1.18.E+08            | 1.04.E+08            |
| 1442 | Q9UHG3    | prenylcysteine oxidase 1 [OS=Homo sapiens]                                                     | 25.625        | 8.35.E+07         | 1.04.E+08         | 1.23.E+08         | 1.19.E+08         | 8.48.E+07            | 9.65.E+07            | 9.14.E+07            | 1.05.E+08            | 7.31.E+07            | 1.08.E+08            | 1.13.E+08            | 1.23.E+08            |
| 1443 | Q9H0C8    | Integrin-linked kinase-associated serine/threonine phosphatase 2C [OS=Homo sapiens]            | 25.588        | 1.63.E+07         | 7.99.E+06         | 1.27.E+07         |                   | 1.70.E+07            | 1.16.E+07            | 9.88.E+06            | 1.12.E+07            | 6.49.E+06            | 7.74.E+06            | 3.82.E+06            | 5.83.E+06            |
| 1444 | Q9NUP9    | Protein lin-7 homolog C [OS=Homo sapiens]                                                      | 25.527        | 1.14.E+08         | 8.76.E+07         | 2.05.E+08         | 1.15.E+08         | 1.04.E+08            | 1.08.E+08            | 1.11.E+08            | 1.10.E+08            | 1.07.E+08            | 1.16.E+08            | 1.19.E+08            | 2.24.E+08            |
| 1445 | Q68E01    | Integrator complex subunit 3 [OS=Homo sapiens]                                                 | 25.479        | 2.30.E+07         | 1.88.E+07         | 2.01.E+07         | 1.30.E+07         | 1.58.E+07            | 1.35.E+07            | 2.08.E+07            | 1.72.E+07            | 1.76.E+07            | 1.84.E+07            | 2.21.E+07            | 1.47.E+07            |
| 1446 | Q9NP58    | ATP-binding cassette sub-family B member 6, mitochondrial [OS=Homo sapiens]                    | 25.461        | 9.06.E+07         | 9.29.E+07         | 9.32.E+07         | 8.65.E+07         | 8.10.E+07            | 8.92.E+07            | 8.86.E+07            | 8.46.E+07            | 7.84.E+07            | 8.25.E+07            | 8.02.E+07            | 7.96.E+07            |
| 1447 | O00515    | Ladinin-1 [OS=Homo sapiens]                                                                    | 25.436        | 5.91.E+07         | 5.27.E+07         | 5.24.E+07         | 4.82.E+07         | 7.93.E+07            | 8.03.E+07            | 8.15.E+07            | 8.16.E+07            | 7.38.E+07            | 7.67.E+07            | 7.05.E+07            | 7.55.E+07            |
| 1448 | Q13564-1  | NEDD8-activating enzyme E1 regulatory subunit [OS=Homo sapiens]                                | 25.379        | 2.34.E+07         | 1.91.E+07         | 2.07.E+07         | 2.10.E+07         | 1.65.E+07            | 1.64.E+07            | 1.79.E+07            | 1.65.E+07            | 2.89.E+07            | 2.58.E+07            | 2.41.E+07            | 3.11.E+07            |
| 1449 | Q13573    | SNW domain-containing protein 1 [OS=Homo sapiens]                                              | 25.354        | 7.13.E+07         | 5.42.E+07         | 5.51.E+07         | 6.42.E+07         | 2.73.E+07            | 2.99.E+07            | 3.03.E+07            | 2.33.E+07            | 2.71.E+07            | 3.27.E+07            | 3.21.E+07            | 3.11.E+07            |
| 1450 | P12955    | xaa-Pro dipeptidase [OS=Homo sapiens]                                                          | 25.29         | 1.58.E+07         | 1.66.E+07         | 1.92.E+07         | 1.70.E+07         | 1.61.E+07            | 1.57.E+07            | 1.31.E+07            | 1.18.E+07            | 2.06.E+07            | 2.22.E+07            | 2.35.E+07            | 1.74.E+07            |
| 1451 | Q96IJ6    | Mannose-1-phosphate guanylttransferase alpha [OS=Homo sapiens]                                 | 25.24         | 4.72.E+07         | 1.91.E+07         | 2.29.E+07         | 2.82.E+07         | 3.58.E+07            | 4.17.E+07            | 3.05.E+07            | 4.17.E+07            | 3.28.E+07            | 3.97.E+07            | 3.80.E+07            | 3.01.E+07            |
| 1452 | Q15427    | Splicing factor 3b subunit 4 [OS=Homo sapiens]                                                 | 25.22         | 9.04.E+07         | 8.53.E+07         | 7.88.E+07         | 9.09.E+07         | 8.92.E+07            | 1.04.E+08            | 9.80.E+07            | 9.04.E+07            | 1.04.E+08            | 1.17.E+08            | 1.12.E+08            | 1.11.E+08            |
| 1453 | Q9NUQ9    | protein FAM49B [OS=Homo sapiens]                                                               | 25.191        | 7.16.E+07         | 7.10.E+07         | 6.22.E+07         | 6.89.E+07         | 6.62.E+07            | 4.91.E+07            | 7.26.E+07            | 6.60.E+07            | 7.70.E+07            | 5.27.E+07            | 7.51.E+07            | 8.29.E+07            |
| 1454 | P56211    | cAMP-regulated phosphoprotein 19 [OS=Homo sapiens]                                             | 25.166        | 8.17.E+07         | 8.43.E+07         | 8.77.E+07         | 8.92.E+07         | 7.87.E+07            | 8.29.E+07            | 8.11.E+07            | 7.89.E+07            | 8.44.E+07            | 9.42.E+07            | 8.45.E+07            | 7.17.E+07            |
| 1455 | O43583    | density-regulated protein [OS=Homo sapiens]                                                    | 25.159        | 1.54.E+08         | 1.80.E+08         | 1.69.E+08         | 1.71.E+08         | 1.70.E+08            | 1.76.E+08            | 1.81.E+08            | 1.92.E+08            | 2.27.E+08            | 1.97.E+08            | 2.02.E+08            | 1.83.E+08            |
| 1456 | Q12788    | Transducin beta-like protein 3 [OS=Homo sapiens]                                               | 25.114        | 3.41.E+07         | 2.17.E+07         | 2.28.E+07         | 2.60.E+07         | 2.12.E+07            | 2.11.E+07            | 2.12.E+07            | 1.45.E+07            | 2.31.E+07            | 1.97.E+07            | 1.45.E+07            | 1.33.E+07            |
| 1457 | P09012    | U1 SMALL NUCLEAR RIBONUCLEOPROTEIN A [OS=Homo sapiens]                                         | 25.086        | 3.16.E+08         | 3.20.E+08         | 3.11.E+08         | 3.06.E+08         | 3.05.E+08            | 3.09.E+08            | 3.04.E+08            | 3.14.E+08            | 3.65.E+08            | 3.50.E+08            | 3.46.E+08            | 3.32.E+08            |
| 1458 | P61960    | Ubiquitin-fold modifier 1 [OS=Homo sapiens]                                                    | 25.034        | 1.53.E+08         | 1.35.E+08         | 1.37.E+08         | 1.42.E+08         | 1.54.E+08            | 1.47.E+08            | 1.51.E+08            | 1.40.E+08            | 1.47.E+08            | 1.51.E+08            | 1.42.E+08            | 1.60.E+08            |
| 1459 | O43272    | Proline dehydrogenase 1, mitochondrial [OS=Homo sapiens]                                       | 25.028        | 1.17.E+08         | 1.37.E+08         | 1.33.E+08         | 1.41.E+08         | 1.17.E+08            | 1.02.E+08            | 1.04.E+08            | 1.12.E+08            | 1.14.E+08            | 1.38.E+08            | 1.01.E+08            | 1.24.E+08            |
| 1460 | O95159    | Zinc finger protein-like 1 [OS=Homo sapiens]                                                   | 24.928        | 8.17.E+07         | 7.99.E+07         | 8.17.E+07         | 8.23.E+07         | 9.05.E+07            | 9.13.E+07            | 8.60.E+07            | 9.00.E+07            | 1.03.E+08            | 1.20.E+08            | 1.04.E+08            | 1.04.E+08            |
| 1461 | P19838    | Nuclear factor NF-kappa-B p105 subunit [OS=Homo sapiens]                                       | 24.903        | 2.93.E+07         | 3.11.E+07         | 3.11.E+07         | 2.76.E+07         | 3.14.E+07            | 3.02.E+07            | 2.95.E+07            | 3.32.E+07            | 3.58.E+07            | 3.34.E+07            | 3.94.E+07            | 3.63.E+07            |
| 1462 | Q6UN15-1  | Pre-mRNA 3'-end-processing factor FIP1 [OS=Homo sapiens]                                       | 24.901        | 7.64.E+07         | 9.16.E+07         | 5.17.E+07         | 9.42.E+07         | 7.38.E+07            | 5.54.E+07            | 7.92.E+07            | 5.85.E+07            | 5.66.E+07            | 9.29.E+07            | 8.17.E+07            | 5.80.E+07            |
| 1463 | Q99961    | Endophilin-A2 [OS=Homo sapiens]                                                                | 24.898        | 9.15.E+07         | 1.02.E+08         | 1.12.E+08         | 1.06.E+08         | 1.01.E+08            | 1.22.E+08            | 1.19.E+08            | 1.20.E+08            | 1.07.E+08            | 1.24.E+08            | 1.20.E+08            | 1.23.E+08            |
| 1464 | O75494-1  | Serine/arginine-rich splicing factor 10 [OS=Homo sapiens]                                      | 24.795        | 7.51.E+07         | 6.13.E+07         | 1.14.E+08         | 6.91.E+07         | 6.81.E+07            | 8.59.E+07            | 4.97.E+07            | 8.97.E+07            | 5.63.E+07            | 8.87.E+07            | 5.39.E+07            | 5.69.E+07            |
| 1465 | P35250-1  | Replication factor C subunit 2 [OS=Homo sapiens]                                               | 24.792        | 2.96.E+07         | 3.10.E+07         | 3.44.E+07         | 3.44.E+07         | 2.47.E+07            | 2.84.E+07            | 3.15.E+07            | 2.80.E+07            | 3.02.E+07            | 3.46.E+07            | 3.63.E+07            | 3.44.E+07            |
| 1466 | P46977    | Dolichyl-diphosphooligosaccharide--protein glycosyltransferase subunit STT3A [OS=Homo sapiens] | 24.779        | 1.54.E+08         | 1.42.E+08         | 1.60.E+08         | 1.31.E+08         | 1.76.E+08            | 1.66.E+08            | 1.42.E+08            | 1.65.E+08            | 1.49.E+08            | 1.42.E+08            | 1.21.E+08            | 1.22.E+08            |
| 1467 | P53985    | Monocarboxylate transporter 1 [OS=Homo sapiens]                                                | 24.761        | 1.96.E+07         | 3.07.E+07         | 2.35.E+07         | 2.33.E+07         | 4.17.E+07            | 4.51.E+07            | 3.29.E+07            | 3.44.E+07            | 3.03.E+07            | 3.11.E+07            | 2.81.E+07            | 2.79.E+07            |
| 1468 | Q15796-1  | Mothers against decapentaplegic homolog 2 [OS=Homo sapiens]                                    | 24.746        | 9.17.E+07         | 1.03.E+08         | 1.05.E+08         | 9.06.E+07         | 8.15.E+07            | 8.26.E+07            | 9.03.E+07            | 8.81.E+07            | 1.06.E+08            | 1.11.E+08            | 1.14.E+08            | 1.09.E+08            |
| 1469 | Q96P20    | pseudouridylate synthase 7 homolog [OS=Homo sapiens]                                           | 24.729        | 1.63.E+07         | 8.24.E+06         | 8.24.E+06         | 8.98.E+06         | 1.06.E+07            | 1.05.E+07            | 5.08.E+06            | 8.60.E+06            | 3.27.E+06            | 6.47.E+06            | 5.72.E+06            | 5.67.E+06            |
| 1470 | P52701    | DNA mismatch repair protein MSH6 [OS=Homo sapiens]                                             | 24.689        | 2.39.E+07         | 4.47.E+07         | 4.91.E+07         | 4.67.E+07         | 3.37.E+07            | 3.51.E+07            | 3.75.E+07            | 4.00.E+07            | 2.78.E+07            | 3.44.E+07            | 3.73.E+07            | 3.93.E+07            |
| 1471 | Q9UHV9    | Prefoldin subunit 2 [OS=Homo sapiens]                                                          | 24.676        | 2.04.E+08         | 2.24.E+08         | 2.17.E+08         | 2.11.E+08         | 2.32.E+08            | 2.32.E+08            | 2.37.E+08            | 2.35.E+08            | 2.39.E+08            | 2.68.E+08            | 2.30.E+08            | 2.11.E+08            |
| 1472 | Q8NBQ5    | Estradiol 17-beta-dehydrogenase 11 [OS=Homo sapiens]                                           | 24.667        | 1.50.E+07         | 1.82.E+07         | 1.86.E+07         | 1.93.E+07         | 1.76.E+07            | 1.84.E+07            | 1.89.E+07            | 1.96.E+07            | 3.32.E+07            | 3.29.E+07            | 2.45.E+07            | 2.22.E+07            |
| 1473 | Q9BZE4    | Nucleolar GTP-binding protein 1 [OS=Homo sapiens]                                              | 24.638        | 4.75.E+07         | 9.37.E+07         | 1.01.E+08         | 1.02.E+08         | 9.36.E+07            | 9.39.E+07            | 9.43.E+07            | 9.41.E+07            | 7.92.E+07            | 8.51.E+07            | 9.24.E+07            | 8.93.E+07            |
| 1474 | Q9Y6M1    | Insulin-like growth factor 2 mRNA-binding protein 2 [OS=Homo sapiens]                          | 24.481        | 2.67.E+06         | 2.18.E+06         | 1.81.E+06         |                   | 3.82.E+06            | 3.58.E+06            | 3.94.E+06            | 3.64.E+06            | 4.32.E+06            | 3.04.E+06            | 3.35.E+06            | 2.44.E+06            |
| 1475 | O15212    | Prefoldin subunit 6 [OS=Homo sapiens]                                                          | 24.48         | 2.74.E+08         | 2.68.E+08         | 2.81.E+08         | 2.76.E+08         | 2.33.E+08            | 2.62.E+08            | 2.69.E+08            | 2.81.E+08            | 2.98.E+08            | 3.23.E+08            | 3.20.E+08            | 3.04.E+08            |
| 1476 | Q9BW72    | HIG1 domain family member 2A, mitochondrial [OS=Homo sapiens]                                  | 24.283        | 1.25.E+08         | 6.52.E+07         | 9.62.E+07         | 4.84.E+07         | 6.13.E+07            | 4.21.E+07            | 8.23.E+07            | 5.17.E+07            | 5.66.E+07            | 5.42.E+07            | 6.14.E+07            | 8.73.E+07            |
| 1477 | P53007    | Tricarboxylate transport protein, mitochondrial [OS=Homo sapiens]                              | 24.24         | 1.31.E+08         | 7.40.E+07         | 1.13.E+08         | 1.23.E+08         | 1.28.E+08            | 1.05.E+08            | 1.01.E+08            | 1.05.E+08            | 1.36.E+08            | 1.04.E+08            | 9.96.E+07            | 1.10.E+08            |
| 1478 | Q9NP81-1  | Serine--tRNA ligase, mitochondrial [OS=Homo sapiens]                                           | 24.23         | 1.61.E+07         | 2.56.E+07         | 2.78.E+07         | 3.19.E+07         | 2.43.E+07            | 2.65.E+07            | 2.56.E+07            | 2.97.E+07            | 2.80.E+07            | 3.28.E+07            | 3.07.E+07            | 3.13.E+07            |
| 1479 | P84095    | Rho-related GTP-binding protein RhoG [OS=Homo sapiens]                                         | 24.127        | 4.20.E+07         | 3.00.E+07         | 4.15.E+07         | 4.09.E+07         | 5.10.E+07            | 4.38.E+07            | 1.12.E+07            | 3.88.E+07            | 3.70.E+07            | 2.89.E+07            | 2.56.E+07            | 4.11.E+07            |
| 1480 | Q9NX63    | MICOS complex subunit MIC19 [OS=Homo sapiens]                                                  | 24.062        | 4.20.E+07         | 4.36.E+07         | 4.80.E+07         | 4.76.E+07         | 4.48.E+07            | 4.97.E+07            | 3.25.E+07            | 2.69.E+07            | 4.78.E+07            | 5.09.E+07            | 4.72.E+07            | 4.73.E+07            |
| 1481 | P58546    | Myotrophin [OS=Homo sapiens]                                                                   | 24.024        | 1.31.E+08         | 1.33.E+08         | 1.38.E+08         | 1.37.E+08         | 1.37.E+08            | 1.34.E+08            | 1.32.E+08            | 1.30.E+08            | 1.49.E+08            | 1.40.E+08            | 1.35.E+08            | 1.44.E+08            |
| 1482 | P62304    | small nuclear ribonucleoprotein E [OS=Homo sapiens]                                            | 24.005        | 1.21.E+08         | 1.78.E+08         | 8.59.E+07         | 1.57.E+08         | 2.07.E+08            | 2.24.E+08            | 1.32.E+08            | 1.16.E+08            | 2.02.E+08            | 1.16.E+08            | 8.89.E+07            | 1.87.E+08            |
| 1483 | P56134    | ATP synthase subunit f, mitochondrial [OS=Homo sapiens]                                        | 23.991        | 2.41.E+08         | 1.17.E+08         | 9.40.E+07         | 2.33.E+08         | 2.06.E+08            | 2.13.E+08            | 1.91.E+08            | 1.18.E+08            | 2.22.E+08            | 1.63.E+08            | 2.22.E+08            | 1.87.E+08            |
| 1484 | Q14011    | Cold-inducible RNA-binding protein [OS=Homo sapiens]                                           | 23.936        | 5.14.E+07         | 4.52.E+07         | 5.08.E+07         | 6.06.E+07         | 6.08.E+07            | 6.19.E+07            | 6.74.E+07            | 5.92.E+07            | 6.27.E+07            | 1.68.E+07            | 5.16.E+07            | 4.79.E+07            |
| 1485 | P51114-1  | Fragile X mental retardation syndrome-related protein 1 [OS=Homo sapiens]                      | 23.843        | 1.05.E+08         | 1.16.E+08         | 1.15.E+08         | 1.21.E+08         | 1.03.E+08            | 1.42.E+08            | 1.03.E+08            | 1.10.E+08            | 9.03.E+07            | 1.09.E+08            | 1.13.E+08            | 1.00.E+08            |
| 1486 | Q9Y639-2  | Neuroplastin [OS=Homo sapiens]                                                                 | 23.787        | 5.59.E+07         | 5.96.E+07         | 5.62.E+07         | 5.41.E+07         | 4.64.E+07            | 4.93.E+07            | 4.46.E+07            | 5.38.E+07            | 5.12.E+07            | 5.02.E+07            | 5.45.E+07            |                      |
| 1487 | Q15269    | Periodic tryptophan protein 2 homolog [OS=Homo sapiens]                                        | 23.779        | 9.15.E+07         | 1.04.E+08         | 1.00.E+08         | 1.09.E+08         | 8.08.E+07            | 8.53.E+07            | 9.18.E+07            | 7.73.E+07            | 1.10.E+08            | 8.36.E+07            | 8.68.E+07            | 1.28.E+08            |

| No.  | Accession | Description                                                                                    | Sum PEP Score | CTRL Abundances_1 | CTRL Abundances_2 | CTRL Abundances_3 | CTRL Abundances_4 | CLDN6-1 Abundances_1 | CLDN6-1 Abundances_2 | CLDN6-1 Abundances_3 | CLDN6-1 Abundances_4 | CLDN6-2 Abundances_1 | CLDN6-2 Abundances_2 | CLDN6-2 Abundances_3 | CLDN6-2 Abundances_4 |
|------|-----------|------------------------------------------------------------------------------------------------|---------------|-------------------|-------------------|-------------------|-------------------|----------------------|----------------------|----------------------|----------------------|----------------------|----------------------|----------------------|----------------------|
| 1488 | Q92890    | Ubiquitin recognition factor in ER-associated degradation protein 1 [OS=Homo sapiens]          | 23.718        | 6.49.E+07         | 6.19.E+07         | 6.77.E+07         | 5.56.E+07         | 6.27.E+07            | 6.28.E+07            | 6.17.E+07            | 5.48.E+07            | 5.95.E+07            | 4.84.E+07            | 4.30.E+07            | 4.35.E+07            |
| 1489 | P52943    | Cysteine-rich protein 2 [OS=Homo sapiens]                                                      | 23.71         | 2.93.E+07         | 3.09.E+07         | 3.38.E+07         | 3.34.E+07         | 2.50.E+06            | 3.42.E+06            | 2.15.E+06            | 4.01.E+06            | 2.53.E+07            | 2.72.E+07            | 3.12.E+07            | 2.98.E+07            |
| 1490 | Q9H9A6    | Leucine-rich repeat-containing protein 40 [OS=Homo sapiens]                                    | 23.706        | 1.13.E+07         | 2.08.E+07         | 1.73.E+07         | 1.45.E+07         | 2.50.E+07            | 2.45.E+07            | 2.95.E+07            | 2.70.E+07            | 2.53.E+07            | 2.72.E+07            | 3.12.E+07            | 2.98.E+07            |
| 1491 | Q9NWX4    | UPF0587 protein C1orf123 [OS=Homo sapiens]                                                     | 23.697        | 1.04.E+08         | 1.16.E+08         | 1.28.E+08         | 1.12.E+08         | 9.44.E+07            | 1.10.E+08            | 1.00.E+08            | 1.02.E+08            | 1.46.E+08            | 1.51.E+08            | 1.46.E+08            | 1.45.E+08            |
| 1492 | Q9UBF2    | Coatamer subunit gamma-2 [OS=Homo sapiens]                                                     | 23.674        | 4.75.E+06         | 3.75.E+06         | 3.97.E+06         | 4.03.E+06         | 4.85.E+06            | 4.79.E+06            | 5.46.E+06            | 5.47.E+06            | 4.92.E+06            | 4.50.E+06            | 5.83.E+06            | 5.73.E+06            |
| 1493 | P62993    | Growth factor receptor-bound protein 2 [OS=Homo sapiens]                                       | 23.626        | 1.17.E+08         | 1.05.E+08         | 1.24.E+08         | 1.08.E+08         | 9.43.E+07            | 1.05.E+08            | 1.27.E+08            | 1.02.E+08            | 7.11.E+07            | 6.78.E+07            | 4.04.E+07            | 8.76.E+07            |
| 1494 | O15031    | Plexin-B2 [OS=Homo sapiens]                                                                    | 23.615        | 4.52.E+07         | 3.43.E+07         | 2.78.E+07         | 2.68.E+07         | 4.87.E+07            | 3.28.E+07            | 3.37.E+07            | 3.92.E+07            | 4.85.E+07            | 4.18.E+07            | 3.06.E+07            | 4.13.E+07            |
| 1495 | Q02818    | Nucleobindin-1 [OS=Homo sapiens]                                                               | 23.597        | 3.56.E+07         | 3.43.E+07         | 3.60.E+07         | 4.45.E+07         | 2.39.E+07            | 3.59.E+07            | 3.79.E+07            | 3.32.E+07            | 2.74.E+07            | 3.13.E+07            | 3.21.E+07            | 2.79.E+07            |
| 1496 | P35080-1  | Profilin-2 [OS=Homo sapiens]                                                                   | 23.542        | 1.65.E+08         | 1.75.E+08         | 1.75.E+08         | 1.87.E+08         | 1.86.E+08            | 1.87.E+08            | 1.87.E+08            | 1.82.E+08            | 1.69.E+08            | 1.86.E+08            | 1.91.E+08            | 1.79.E+08            |
| 1497 | P40616    | ADP-ribosylation factor-like protein 1 [OS=Homo sapiens]                                       | 23.537        | 6.58.E+07         | 5.80.E+07         | 6.44.E+07         | 6.14.E+07         | 6.41.E+07            | 6.61.E+07            | 5.77.E+07            | 5.39.E+07            | 7.21.E+07            | 6.10.E+07            | 5.90.E+07            | 6.47.E+07            |
| 1498 | O94905-1  | Erlin-2 [OS=Homo sapiens]                                                                      | 23.511        | 1.34.E+07         | 1.48.E+07         | 1.03.E+07         | 1.01.E+07         | 7.50.E+06            | 9.69.E+06            | 5.23.E+06            | 1.20.E+07            | 7.83.E+06            | 1.26.E+07            | 1.26.E+07            | 1.26.E+07            |
| 1499 | P43007-1  | neutral amino acid transporter A [OS=Homo sapiens]                                             | 23.466        | 1.14.E+08         | 7.78.E+07         | 6.81.E+07         | 6.38.E+07         | 6.37.E+07            | 1.19.E+08            | 1.14.E+08            | 1.14.E+08            | 4.66.E+07            | 6.91.E+07            | 3.19.E+07            | 4.08.E+07            |
| 1500 | Q9Y295    | developmentally-regulated GTP-binding protein 1 [OS=Homo sapiens]                              | 23.46         | 5.57.E+07         | 7.10.E+07         | 6.75.E+07         | 6.67.E+07         | 6.16.E+07            | 6.39.E+07            | 6.72.E+07            | 5.98.E+07            | 8.66.E+07            | 4.88.E+07            | 5.07.E+07            | 5.10.E+07            |
| 1501 | Q13751    | Laminin subunit beta-3 [OS=Homo sapiens]                                                       | 23.367        | 1.78.E+07         | 1.62.E+07         | 1.51.E+07         | 1.39.E+07         | 2.47.E+07            | 2.49.E+07            | 2.52.E+07            | 2.59.E+07            | 1.24.E+07            | 1.57.E+07            | 1.81.E+07            | 1.36.E+07            |
| 1502 | Q01658    | Protein Dr1 [OS=Homo sapiens]                                                                  | 23.349        | 1.60.E+07         | 1.28.E+07         | 8.07.E+06         | 1.34.E+07         | 1.88.E+07            | 6.71.E+06            | 2.10.E+07            | 1.21.E+07            | 1.62.E+07            | 1.46.E+07            | 1.24.E+07            | 2.08.E+07            |
| 1503 | P43353-1  | Aldehyde dehydrogenase family 3 member B1 [OS=Homo sapiens]                                    | 23.339        | 2.97.E+07         | 3.27.E+07         | 3.66.E+07         | 3.10.E+07         | 2.38.E+07            | 2.59.E+07            | 2.55.E+07            | 2.49.E+07            | 4.02.E+07            | 4.79.E+07            | 4.51.E+07            | 4.36.E+07            |
| 1504 | P11177    | Pyruvate dehydrogenase E1 component subunit beta, mitochondrial [OS=Homo sapiens]              | 23.305        | 1.70.E+08         | 1.84.E+08         | 1.75.E+08         | 1.42.E+08         | 3.34.E+08            | 1.56.E+08            | 1.47.E+08            | 1.12.E+08            | 1.85.E+08            | 2.11.E+08            | 5.59.E+08            | 2.57.E+08            |
| 1505 | Q92530    | proteasome inhibitor Pi31 subunit [OS=Homo sapiens]                                            | 23.26         | 3.22.E+07         | 4.85.E+07         | 5.47.E+07         | 5.31.E+07         | 5.42.E+07            | 7.02.E+07            | 6.96.E+07            | 7.58.E+07            | 5.43.E+07            | 7.27.E+07            | 7.19.E+07            | 7.45.E+07            |
| 1506 | Q06203    | amidophosphoribosyltransferase [OS=Homo sapiens]                                               | 23.257        | 7.44.E+07         | 7.53.E+07         | 8.43.E+07         | 8.24.E+07         | 6.04.E+07            | 6.63.E+07            | 6.77.E+07            | 6.62.E+07            | 7.73.E+07            | 9.89.E+07            | 9.54.E+07            | 9.97.E+07            |
| 1507 | O14773    | Tripeptidyl-peptidase 1 [OS=Homo sapiens]                                                      | 23.209        | 8.25.E+07         | 7.90.E+07         | 6.84.E+07         | 5.47.E+07         | 5.24.E+07            | 4.58.E+07            | 4.32.E+07            | 4.71.E+07            | 8.93.E+07            | 8.21.E+07            | 7.80.E+07            | 8.04.E+07            |
| 1508 | O00422    | Histone deacetylase complex subunit SAP18 [OS=Homo sapiens]                                    | 23.169        | 1.23.E+08         | 1.14.E+08         | 1.29.E+08         | 1.33.E+08         | 1.26.E+08            | 1.24.E+08            | 1.18.E+08            | 1.24.E+08            | 1.18.E+08            | 1.24.E+08            | 1.31.E+08            | 1.32.E+08            |
| 1509 | Q00059    | Transcription factor A, mitochondrial [OS=Homo sapiens]                                        | 23.018        | 2.09.E+08         | 2.18.E+08         | 2.12.E+08         | 2.05.E+08         | 1.93.E+08            | 2.02.E+08            | 2.00.E+08            | 2.08.E+08            | 2.24.E+08            | 2.25.E+08            | 2.09.E+08            | 2.23.E+08            |
| 1510 | O00170    | AH receptor-interacting protein [OS=Homo sapiens]                                              | 22.953        | 2.47.E+07         | 2.42.E+07         | 2.69.E+07         | 3.15.E+07         | 2.16.E+07            | 1.83.E+07            | 1.87.E+07            | 2.15.E+07            | 2.65.E+07            | 2.97.E+07            | 2.71.E+07            | 2.73.E+07            |
| 1511 | Q92544    | Transmembrane 9 superfamily member 4 [OS=Homo sapiens]                                         | 22.911        | 3.41.E+08         | 3.86.E+08         | 4.54.E+08         | 4.36.E+08         | 4.07.E+08            | 4.51.E+08            | 4.46.E+08            | 4.60.E+08            | 4.20.E+08            | 5.19.E+08            | 5.14.E+08            | 5.04.E+08            |
| 1512 | Q9NQW7-1  | xa-Pro aminopeptidase 1 [OS=Homo sapiens]                                                      | 22.835        | 2.87.E+07         | 1.64.E+07         | 1.95.E+07         | 2.20.E+07         | 2.88.E+07            | 3.39.E+07            | 3.66.E+07            | 2.97.E+07            | 3.55.E+07            | 2.82.E+07            | 2.72.E+07            | 2.31.E+07            |
| 1513 | Q86Y56    | Dynein assembly factor 5, axonemal [OS=Homo sapiens]                                           | 22.776        | 5.54.E+07         | 5.37.E+07         | 5.37.E+07         | 6.78.E+07         | 6.38.E+07            | 7.45.E+07            | 6.15.E+07            | 5.56.E+07            | 7.53.E+07            | 6.52.E+07            | 6.06.E+07            | 7.06.E+07            |
| 1514 | Q9Y3B8-1  | Oligoribonuclease, mitochondrial [OS=Homo sapiens]                                             | 22.774        | 6.11.E+07         | 6.57.E+07         | 6.73.E+07         | 3.82.E+07         | 7.91.E+07            | 8.54.E+07            | 8.41.E+07            | 5.30.E+07            | 7.63.E+07            | 4.80.E+07            | 7.08.E+07            | 6.94.E+07            |
| 1515 | Q9NY12-1  | H/ACA ribonucleoprotein complex subunit 1 [OS=Homo sapiens]                                    | 22.773        | 2.12.E+08         | 2.11.E+08         | 2.09.E+08         | 1.82.E+08         | 1.70.E+08            | 1.59.E+08            | 1.71.E+08            | 1.96.E+08            | 2.15.E+08            | 2.15.E+08            | 2.12.E+08            | 1.93.E+08            |
| 1516 | Q7L5N1    | COP9 signalosome complex subunit 6 [OS=Homo sapiens]                                           | 22.703        | 1.98.E+08         | 2.03.E+08         | 1.73.E+08         | 1.79.E+08         | 2.15.E+08            | 1.87.E+08            | 1.64.E+08            | 1.62.E+08            | 2.17.E+08            | 1.61.E+08            | 1.80.E+08            | 1.72.E+08            |
| 1517 | Q9UBI6    | guanine nucleotide-binding protein g(i)(g(s)/g(o) subunit gamma-12 [OS=Homo sapiens]           | 22.669        | 1.23.E+08         | 9.14.E+07         | 8.53.E+07         | 9.20.E+07         | 1.52.E+08            | 1.13.E+08            | 1.17.E+08            | 1.01.E+08            | 1.16.E+08            | 1.06.E+08            | 1.09.E+08            | 9.40.E+07            |
| 1518 | O75475-1  | PC4 and SFRS1-interacting protein [OS=Homo sapiens]                                            | 22.635        | 3.86.E+07         | 3.08.E+07         | 2.63.E+07         | 3.25.E+07         | 3.20.E+07            | 3.31.E+07            | 3.18.E+07            | 3.44.E+07            | 3.05.E+07            | 2.84.E+07            | 2.98.E+07            | 2.94.E+07            |
| 1519 | Q8TCJ2    | Dolichyl-diphosphooligosaccharide--protein glycosyltransferase subunit STT3B [OS=Homo sapiens] | 22.607        | 8.65.E+07         | 9.08.E+07         | 9.12.E+07         | 8.77.E+07         | 7.26.E+07            | 7.69.E+07            | 7.62.E+07            | 8.11.E+07            | 9.63.E+07            | 9.74.E+07            | 9.24.E+07            | 8.15.E+07            |
| 1520 | Q96GG9    | DCN1-like protein 1 [OS=Homo sapiens]                                                          | 22.565        | 4.41.E+07         | 3.53.E+07         | 3.86.E+07         | 6.01.E+07         | 3.68.E+07            | 3.64.E+07            | 5.58.E+07            | 3.02.E+07            | 4.48.E+07            | 4.04.E+07            | 4.53.E+07            | 5.28.E+07            |
| 1521 | Q9Y5L4    | mitochondrial import inner membrane translocase subunit TIM13 [OS=Homo sapiens]                | 22.49         | 1.07.E+08         | 1.09.E+08         | 1.43.E+08         | 1.55.E+08         | 7.28.E+07            | 6.07.E+07            | 6.20.E+07            | 6.26.E+07            | 7.21.E+07            | 8.74.E+07            | 1.31.E+08            | 1.21.E+08            |
| 1522 | Q9BSD7    | Cancer-related nucleoside-triphosphatase [OS=Homo sapiens]                                     | 22.457        | 5.98.E+06         | 5.27.E+06         | 5.29.E+06         | 4.23.E+06         | 6.18.E+06            | 5.24.E+06            | 1.73.E+06            | 3.62.E+05            | 3.63.E+06            |                      |                      | 2.16.E+06            |
| 1523 | Q9Y333    | U6 snRNA-associated Sm-like protein Lsm2 [OS=Homo sapiens]                                     | 22.448        | 1.03.E+08         | 9.45.E+07         | 7.65.E+07         | 7.58.E+07         | 1.17.E+08            | 9.08.E+07            | 8.31.E+07            | 7.57.E+07            | 9.92.E+07            | 9.39.E+07            | 8.44.E+07            | 8.60.E+07            |
| 1524 | Q9H074    | Polyadenylate-binding protein-interacting protein 1 [OS=Homo sapiens]                          | 22.324        | 4.44.E+07         | 4.57.E+07         | 4.24.E+07         | 5.54.E+07         | 5.12.E+07            | 4.57.E+07            | 4.60.E+07            | 4.88.E+07            | 5.43.E+07            | 4.65.E+07            | 5.43.E+07            | 4.35.E+07            |
| 1525 | P26006    | Integrin alpha-3 [OS=Homo sapiens]                                                             | 22.313        | 1.20.E+08         | 1.30.E+08         | 1.39.E+08         | 1.34.E+08         | 1.24.E+08            | 1.37.E+08            | 1.36.E+08            | 1.40.E+08            | 8.26.E+07            | 1.06.E+08            | 1.24.E+08            | 1.23.E+08            |
| 1526 | O00217    | NADH dehydrogenase [ubiquinone] iron-sulfur protein 8, mitochondrial [OS=Homo sapiens]         | 22.309        | 2.58.E+08         | 2.88.E+08         | 2.85.E+08         | 2.72.E+08         | 2.62.E+08            | 2.72.E+08            | 2.67.E+08            | 2.65.E+08            | 2.91.E+08            | 2.64.E+08            | 2.60.E+08            | 2.40.E+08            |
| 1527 | Q9H0D6-1  | 5'-3' exoribonuclease 2 [OS=Homo sapiens]                                                      | 22.266        | 1.43.E+08         | 1.16.E+08         | 1.32.E+08         | 1.24.E+08         | 1.33.E+08            | 1.37.E+08            | 1.20.E+08            | 1.33.E+08            | 1.28.E+08            | 1.30.E+08            | 1.46.E+08            | 1.22.E+08            |
| 1528 | Q05209-1  | Tyrosine-protein phosphatase non-receptor type 12 [OS=Homo sapiens]                            | 22.259        | 9.51.E+06         | 7.88.E+06         | 9.61.E+06         | 7.37.E+06         | 5.54.E+06            | 1.25.E+07            | 1.12.E+07            | 1.05.E+07            | 1.06.E+07            | 7.49.E+06            | 9.54.E+06            | 7.43.E+06            |
| 1529 | P52434    | DNA-directed RNA polymerases I, II, and III subunit RPABC3 [OS=Homo sapiens]                   | 22.123        | 7.33.E+07         | 6.90.E+07         | 7.69.E+07         | 7.77.E+07         | 3.76.E+07            | 3.83.E+07            | 4.74.E+07            | 4.52.E+07            | 4.10.E+07            | 3.89.E+07            | 5.03.E+07            | 4.93.E+07            |
| 1530 | P15428-1  | 15-hydroxyprostaglandin dehydrogenase [NAD(+)] [OS=Homo sapiens]                               | 22.089        | 4.25.E+07         | 3.07.E+07         | 3.18.E+07         | 4.59.E+07         | 3.54.E+07            | 3.78.E+07            | 3.80.E+07            | 3.96.E+07            | 6.38.E+07            | 4.82.E+07            | 6.68.E+07            | 4.76.E+07            |
| 1531 | P05026    | Sodium/potassium-transporting ATPase subunit beta-1 [OS=Homo sapiens]                          | 22.022        | 1.15.E+08         | 1.30.E+08         | 1.34.E+08         | 4.79.E+07         | 1.42.E+08            | 1.44.E+08            | 1.37.E+08            | 1.51.E+08            | 1.57.E+08            | 1.65.E+08            | 1.65.E+08            | 1.78.E+08            |
| 1532 | Q9UJ70    | N-acetyl-D-glucosamine kinase [OS=Homo sapiens]                                                | 21.966        | 1.18.E+08         | 8.29.E+07         | 8.05.E+07         | 7.18.E+07         | 6.37.E+07            | 5.47.E+07            | 5.60.E+07            | 6.35.E+07            | 9.57.E+07            | 8.91.E+07            | 8.50.E+07            | 8.28.E+07            |
| 1533 | O15269    | serine palmitoyltransferase 1 [OS=Homo sapiens]                                                | 21.922        | 7.99.E+07         | 8.56.E+07         | 1.01.E+08         | 9.21.E+07         | 9.50.E+07            | 9.10.E+07            | 2.67.E+07            | 2.91.E+07            | 1.11.E+08            | 7.68.E+07            | 1.08.E+08            | 1.14.E+08            |
| 1534 | Q96JP5-1  | E3 ubiquitin-protein ligase ZFP91 [OS=Homo sapiens]                                            | 21.9          | 1.62.E+07         | 1.73.E+07         | 1.79.E+07         | 2.01.E+07         | 1.31.E+07            | 1.46.E+07            | 1.55.E+07            | 1.23.E+07            | 1.48.E+07            | 1.64.E+07            | 1.69.E+07            | 1.63.E+07            |
| 1535 | Q9UKM9-1  | RNA-binding protein Raly [OS=Homo sapiens]                                                     | 21.836        | 2.48.E+08         | 2.62.E+08         | 2.67.E+08         | 2.52.E+08         | 2.70.E+08            | 2.75.E+08            | 2.74.E+08            | 2.88.E+08            | 2.23.E+08            | 2.29.E+08            | 2.24.E+08            | 2.24.E+08            |
| 1536 | Q8NH9     | Atlastin-2 [OS=Homo sapiens]                                                                   | 21.828        | 1.68.E+07         | 1.44.E+07         | 1.74.E+07         | 2.12.E+07         | 1.16.E+07            | 1.31.E+07            | 1.14.E+07            | 1.43.E+07            | 1.14.E+07            | 1.54.E+07            | 1.48.E+07            | 1.34.E+07            |
| 1537 | Q9NRR5-1  | Ubiquilin-4 [OS=Homo sapiens]                                                                  | 21.765        | 7.81.E+07         | 8.76.E+07         | 9.04.E+07         | 8.88.E+07         | 7.71.E+07            | 8.06.E+07            | 8.13.E+07            | 8.10.E+07            | 8.80.E+07            | 9.45.E+07            | 9.08.E+07            | 9.09.E+07            |
| 1538 | Q08752    | peptidyl-prolyl cis-trans isomerase D [OS=Homo sapiens]                                        | 21.72         | 5.22.E+07         | 4.31.E+07         | 4.00.E+07         | 4.68.E+07         | 5.31.E+07            | 4.98.E+07            | 4.74.E+07            | 4.09.E+07            | 4.48.E+07            | 4.73.E+07            | 3.77.E+07            | 3.57.E+07            |
| 1539 | Q96CT7    | Coiled-coil domain-containing protein 124 [OS=Homo sapiens]                                    | 21.711        | 8.54.E+07         | 8.56.E+07         | 1.26.E+07         | 9.20.E+07         | 9.80.E+06            | 8.62.E+06            | 1.02.E+08            | 8.94.E+06            | 9.14.E+07            | 9.97.E+07            | 9.27.E+07            | 9.07.E+07            |

| No.  | Accession | Description                                                                                   | Sum PEP<br>Score | CTRL<br>Abundances_1 | CTRL<br>Abundances_2 | CTRL<br>Abundances_3 | CTRL<br>Abundances_4 | CLDN6-1<br>Abundances_1 | CLDN6-1<br>Abundances_2 | CLDN6-1<br>Abundances_3 | CLDN6-1<br>Abundances_4 | CLDN6-2<br>Abundances_1 | CLDN6-2<br>Abundances_2 | CLDN6-2<br>Abundances_3 | CLDN6-2<br>Abundances_4 |
|------|-----------|-----------------------------------------------------------------------------------------------|------------------|----------------------|----------------------|----------------------|----------------------|-------------------------|-------------------------|-------------------------|-------------------------|-------------------------|-------------------------|-------------------------|-------------------------|
| 1540 | O75607    | Nucleoplasmin-3 [OS=Homo sapiens]                                                             | 21.671           | 2.73.E+07            | 2.11.E+07            | 2.04.E+07            | 2.76.E+07            | 2.32.E+07               | 2.41.E+07               | 2.09.E+07               | 2.11.E+07               | 2.03.E+07               | 1.88.E+07               | 1.57.E+07               | 1.88.E+07               |
| 1541 | Q6NXG1-1  | epithelial splicing regulatory protein 1 [OS=Homo sapiens]                                    | 21.662           | 4.70.E+07            | 3.18.E+07            | 1.61.E+07            | 2.46.E+07            | 3.40.E+07               | 3.00.E+07               | 4.29.E+06               | 1.93.E+07               |                         | 6.14.E+06               | 1.22.E+07               | 3.41.E+06               |
| 1542 | Q99447-1  | ethanolamine-phosphate cytidyltransferase [OS=Homo sapiens]                                   | 21.629           | 3.51.E+07            | 8.84.E+07            | 9.50.E+07            | 9.12.E+07            | 9.47.E+07               | 6.91.E+07               | 7.96.E+07               | 8.13.E+07               | 2.02.E+07               | 1.86.E+07               | 2.04.E+07               | 2.33.E+07               |
| 1543 | Q9Y5Z4-1  | Heme-binding protein 2 [OS=Homo sapiens]                                                      | 21.557           | 5.58.E+07            | 5.12.E+07            | 4.73.E+07            | 6.24.E+07            | 2.50.E+07               | 7.44.E+07               | 6.76.E+07               | 6.91.E+07               | 4.76.E+07               | 5.90.E+07               | 2.54.E+07               | 6.01.E+07               |
| 1544 | Q8N5K1    | CDGSH iron-sulfur domain-containing protein 2 [OS=Homo sapiens]                               | 21.56            | 1.71.E+08            | 1.81.E+08            | 1.79.E+08            | 1.80.E+08            | 1.51.E+08               | 1.64.E+08               | 1.66.E+08               | 1.74.E+08               | 2.17.E+08               | 2.14.E+08               | 2.17.E+08               | 2.08.E+08               |
| 1545 | P15151-1  | Poliovirus receptor [OS=Homo sapiens]                                                         | 21.559           | 7.14.E+07            | 7.14.E+07            | 6.81.E+07            | 7.00.E+07            | 1.10.E+08               | 1.09.E+08               | 1.13.E+08               | 1.11.E+08               | 6.31.E+07               | 6.00.E+07               | 5.95.E+07               | 5.87.E+07               |
| 1546 | Q9NPJ3-1  | Acyl-coenzyme A thioesterase 13 [OS=Homo sapiens]                                             | 21.557           | 4.31.E+08            | 4.42.E+08            | 4.37.E+08            | 3.80.E+08            | 4.43.E+08               | 4.60.E+08               | 4.57.E+08               | 4.73.E+08               | 4.59.E+08               | 4.18.E+08               | 3.98.E+08               | 4.33.E+08               |
| 1547 | Q9UHR4    | Brain-specific angiogenesis inhibitor 1-associated protein 2-like protein 1 [OS=Homo sapiens] | 21.516           | 5.07.E+07            | 4.89.E+07            | 5.50.E+07            | 5.48.E+07            | 4.33.E+07               | 4.08.E+07               | 4.48.E+07               | 4.48.E+07               | 4.57.E+07               | 4.84.E+07               | 5.13.E+07               | 5.19.E+07               |
| 1548 | Q02241-1  | Kinesin-like protein KIF23 [OS=Homo sapiens]                                                  | 21.472           | 4.48.E+07            | 3.85.E+07            | 3.64.E+07            | 4.09.E+07            | 3.88.E+07               | 3.28.E+07               | 3.63.E+07               | 2.94.E+07               | 4.28.E+07               | 3.96.E+07               | 3.75.E+07               | 3.73.E+07               |
| 1549 | Q86UE4    | protein LYRIC [OS=Homo sapiens]                                                               | 21.417           |                      |                      |                      |                      |                         |                         |                         |                         |                         |                         |                         |                         |
| 1550 | Q8TCT9-1  | Minor histocompatibility antigen H13 [OS=Homo sapiens]                                        | 21.302           | 6.22.E+07            | 5.58.E+07            | 6.26.E+07            | 4.61.E+07            | 5.23.E+07               | 5.55.E+07               | 5.87.E+07               | 6.49.E+07               | 6.65.E+07               | 6.82.E+07               | 6.69.E+07               | 6.29.E+07               |
| 1551 | Q13243-1  | Serine/arginine-rich splicing factor 5 [OS=Homo sapiens]                                      | 21.282           | 8.31.E+07            | 8.66.E+07            | 9.07.E+07            | 8.42.E+07            | 8.58.E+07               | 8.92.E+07               | 9.23.E+07               | 1.01.E+08               | 1.13.E+08               | 1.01.E+08               | 1.12.E+08               | 1.16.E+08               |
| 1552 | Q13740-1  | CD166 antigen [OS=Homo sapiens]                                                               | 21.258           | 5.47.E+07            | 4.45.E+07            | 4.39.E+07            | 5.11.E+07            | 5.08.E+07               | 5.38.E+07               | 5.58.E+07               | 4.89.E+07               | 5.27.E+07               | 5.37.E+07               | 5.14.E+07               | 5.19.E+07               |
| 1553 | Q9UKD2    | mRNA turnover protein 4 homolog [OS=Homo sapiens]                                             | 21.158           | 5.06.E+08            | 5.66.E+08            | 5.76.E+08            | 5.32.E+08            | 5.56.E+08               | 5.89.E+08               | 5.95.E+08               | 5.90.E+08               | 6.22.E+08               | 6.25.E+08               | 6.19.E+08               | 6.41.E+08               |
| 1554 | Q9Y6Y8    | SEC23-interacting protein [OS=Homo sapiens]                                                   | 21.134           | 5.51.E+07            | 5.60.E+07            | 5.79.E+07            | 5.61.E+07            | 4.76.E+07               | 4.96.E+07               | 4.87.E+07               | 4.68.E+07               | 6.87.E+07               | 7.18.E+07               | 6.93.E+07               | 6.68.E+07               |
| 1555 | P17480-1  | Nucleolar transcription factor 1 [OS=Homo sapiens]                                            | 20.848           | 6.81.E+07            | 6.34.E+07            | 7.13.E+07            | 7.23.E+07            | 4.95.E+07               | 5.37.E+07               | 5.18.E+07               | 5.16.E+07               | 5.81.E+07               | 6.81.E+07               | 7.00.E+07               | 6.88.E+07               |
| 1556 | Q09161    | Nuclear cap-binding protein subunit 1 [OS=Homo sapiens]                                       | 20.845           | 3.82.E+07            | 3.59.E+07            | 3.33.E+07            | 3.61.E+07            | 3.23.E+07               | 2.95.E+07               | 3.45.E+07               | 3.60.E+07               | 3.20.E+07               | 2.95.E+07               | 2.86.E+07               | 3.08.E+07               |
| 1557 | Q01970-1  | 1-phosphatidylinositol 4,5-bisphosphate phosphodiesterase beta-3 [OS=Homo sapiens]            | 20.831           | 1.06.E+07            | 9.55.E+06            | 8.25.E+06            | 9.70.E+06            | 1.34.E+07               | 1.73.E+07               | 1.58.E+07               | 1.57.E+07               | 8.84.E+06               | 6.04.E+06               | 7.78.E+06               | 6.85.E+06               |
| 1558 | O95197    | Reticulon-3 [OS=Homo sapiens]                                                                 | 20.807           | 4.37.E+07            | 4.12.E+07            | 4.88.E+07            | 5.47.E+07            | 4.40.E+07               | 4.74.E+07               | 4.89.E+07               | 4.75.E+07               | 4.97.E+07               | 4.87.E+07               | 5.03.E+07               | 5.56.E+07               |
| 1559 | Q9UIL1-1  | Short coiled-coil protein [OS=Homo sapiens]                                                   | 20.798           | 2.77.E+07            | 1.82.E+07            | 2.91.E+07            | 2.46.E+07            | 1.72.E+07               | 1.78.E+07               | 1.33.E+07               | 1.94.E+07               | 1.51.E+07               | 1.31.E+07               | 1.34.E+07               | 3.97.E+06               |
| 1560 | P42285    | Superkiller viralicidal activity 2-like 2 [OS=Homo sapiens]                                   | 20.793           | 3.69.E+07            | 2.20.E+07            | 2.14.E+07            | 3.50.E+07            | 2.75.E+07               | 2.79.E+07               | 2.77.E+07               | 1.30.E+07               | 3.29.E+07               | 2.90.E+07               | 3.31.E+07               | 2.89.E+07               |
| 1561 | Q9HDD3-1  | 39S ribosomal protein L47, mitochondrial [OS=Homo sapiens]                                    | 20.792           | 9.10.E+07            | 8.73.E+07            | 8.77.E+07            | 9.83.E+07            | 8.43.E+07               | 8.16.E+07               | 7.96.E+07               | 8.47.E+07               | 8.49.E+07               | 9.10.E+07               | 8.62.E+07               | 9.64.E+07               |
| 1562 | O95202-1  | mitochondrial proton/calcium exchanger protein [OS=Homo sapiens]                              | 20.774           | 8.24.E+07            | 6.84.E+07            | 7.59.E+07            | 7.44.E+07            | 7.79.E+07               | 6.38.E+07               | 6.64.E+07               | 6.29.E+07               | 5.19.E+07               | 7.03.E+07               | 6.67.E+07               | 6.09.E+07               |
| 1563 | P62495    | Eukaryotic peptide chain release factor subunit 1 [OS=Homo sapiens]                           | 20.604           | 1.78.E+08            | 1.84.E+08            | 1.88.E+08            | 1.88.E+08            | 1.76.E+08               | 1.70.E+08               | 1.77.E+08               | 1.77.E+08               | 1.81.E+08               | 1.67.E+08               | 1.78.E+08               | 1.73.E+08               |
| 1564 | P32321    | deoxycytidylate deaminase [OS=Homo sapiens]                                                   | 20.561           | 9.93.E+07            | 7.01.E+07            | 6.97.E+07            | 7.33.E+07            | 4.93.E+07               | 8.25.E+07               | 7.95.E+07               | 9.48.E+07               | 7.88.E+07               | 8.79.E+07               | 8.64.E+07               | 8.30.E+07               |
| 1565 | P47755    | F-actin-capping protein subunit alpha-2 [OS=Homo sapiens]                                     | 20.467           | 8.38.E+07            | 6.29.E+07            | 5.69.E+07            | 6.10.E+07            | 8.00.E+07               | 8.44.E+07               | 5.08.E+07               | 8.25.E+07               | 6.88.E+07               | 6.41.E+07               | 9.11.E+07               | 1.07.E+08               |
| 1566 | P62306    | Small nuclear ribonucleoprotein F [OS=Homo sapiens]                                           | 20.46            | 2.11.E+08            | 2.04.E+08            | 2.19.E+08            | 2.09.E+08            | 2.20.E+08               | 2.19.E+08               | 2.20.E+08               | 2.26.E+08               | 2.09.E+08               | 2.32.E+08               | 2.33.E+08               | 2.12.E+08               |
| 1567 | Q8NFH5    | Nucleoporin NUP53 [OS=Homo sapiens]                                                           | 20.458           | 8.27.E+06            | 7.73.E+06            | 1.20.E+07            | 2.43.E+07            | 6.89.E+06               | 1.24.E+07               | 1.42.E+07               | 1.67.E+07               | 8.83.E+06               | 2.16.E+07               | 2.20.E+07               |                         |
| 1568 | O75223-1  | gamma-glutamylcyclotransferase [OS=Homo sapiens]                                              | 20.34            | 2.73.E+07            | 2.12.E+07            | 2.17.E+07            | 2.35.E+07            | 2.94.E+07               | 2.49.E+07               | 2.49.E+07               | 2.27.E+07               | 5.40.E+07               | 2.59.E+07               | 1.96.E+07               | 2.10.E+07               |
| 1569 | Q14683    | structural maintenance of chromosomes protein 1a [OS=Homo sapiens]                            | 20.302           | 7.56.E+07            | 8.36.E+07            | 6.57.E+07            | 6.34.E+07            | 6.48.E+07               | 6.04.E+07               | 6.51.E+07               | 5.10.E+07               | 8.26.E+07               | 4.92.E+07               | 7.15.E+07               | 5.13.E+07               |
| 1570 | P23434    | Glycine cleavage system H protein, mitochondrial [OS=Homo sapiens]                            | 20.25            | 7.31.E+07            | 7.11.E+07            | 6.83.E+07            | 6.89.E+07            | 5.99.E+07               | 5.26.E+07               | 5.46.E+07               | 5.51.E+07               | 1.07.E+08               | 9.53.E+07               | 9.38.E+07               | 9.22.E+07               |
| 1571 | Q8NFJ5    | Retinoic acid-induced protein 3 [OS=Homo sapiens]                                             | 20.246           | 3.40.E+07            | 2.70.E+07            | 2.93.E+07            | 3.07.E+07            | 1.31.E+08               | 1.54.E+08               | 1.41.E+08               | 1.40.E+08               | 2.97.E+07               | 2.98.E+07               | 4.77.E+07               | 4.77.E+07               |
| 1572 | Q86X29    | Lipolysis-stimulated lipoprotein receptor [OS=Homo sapiens]                                   | 20.184           | 4.62.E+07            | 4.79.E+07            | 5.11.E+07            | 4.76.E+07            | 3.51.E+07               | 5.01.E+07               | 4.69.E+07               | 4.47.E+07               | 2.42.E+07               | 3.30.E+07               | 2.52.E+07               | 3.11.E+07               |
| 1573 | Q9NX24    | H/ACA ribonucleoprotein complex subunit 2 [OS=Homo sapiens]                                   | 20.137           | 6.31.E+07            | 5.13.E+07            | 3.55.E+07            | 6.82.E+07            | 5.79.E+07               | 2.84.E+07               | 2.66.E+07               | 3.10.E+07               | 5.91.E+07               | 3.60.E+07               | 3.62.E+07               | 5.67.E+07               |
| 1574 | Q7L2E3-1  | Putative ATP-dependent RNA helicase DHX30 [OS=Homo sapiens]                                   | 20.136           | 4.95.E+07            | 3.94.E+07            | 4.70.E+07            | 4.29.E+07            | 5.81.E+07               | 1.28.E+07               | 2.29.E+07               | 1.15.E+07               | 3.85.E+07               | 4.14.E+07               | 3.94.E+07               | 3.97.E+07               |
| 1575 | Q9BTE6-1  | Alanyl-tRNA editing protein Aarsd1 [OS=Homo sapiens]                                          | 20.115           | 4.65.E+07            | 5.00.E+07            | 5.10.E+07            | 5.92.E+07            | 3.99.E+07               | 5.28.E+07               | 5.31.E+07               | 1.26.E+07               | 5.77.E+07               | 5.02.E+07               | 4.55.E+07               | 4.98.E+07               |
| 1576 | P04637    | Cellular tumor antigen p53 [OS=Homo sapiens]                                                  | 20.115           | 5.89.E+07            | 5.34.E+07            | 4.90.E+07            | 5.26.E+07            | 5.19.E+07               | 5.12.E+07               | 4.97.E+07               | 5.04.E+07               | 3.77.E+07               | 3.75.E+07               | 3.35.E+07               | 3.25.E+07               |
| 1577 | P49903-1  | Selenide, water dikinase 1 [OS=Homo sapiens]                                                  | 20.066           | 9.23.E+07            | 9.49.E+07            | 5.73.E+07            | 5.63.E+07            | 5.46.E+07               | 5.33.E+07               | 4.73.E+07               | 4.74.E+07               | 6.10.E+07               | 5.73.E+07               | 6.03.E+07               | 6.65.E+07               |
| 1578 | Q9UM00-1  | Calcium load-activated calcium channel [OS=Homo sapiens]                                      | 20.061           | 1.72.E+08            | 1.13.E+08            | 1.13.E+08            | 1.79.E+08            | 1.95.E+08               | 1.90.E+08               | 1.92.E+08               | 1.44.E+08               | 1.58.E+08               | 1.40.E+08               | 1.85.E+08               | 1.68.E+08               |
| 1579 | Q96A49    | Synapse-associated protein 1 [OS=Homo sapiens]                                                | 20.034           | 8.40.E+07            | 7.08.E+07            | 6.88.E+07            | 7.30.E+07            | 8.46.E+07               | 7.09.E+07               | 6.14.E+07               | 6.99.E+07               | 1.01.E+08               | 8.76.E+07               | 8.93.E+07               | 1.04.E+08               |
| 1580 | Q8IY67-2  | Isoform 2 of Ribonucleoprotein PTB-binding 1 [OS=Homo sapiens]                                | 20.023           | 5.66.E+07            | 4.51.E+07            | 5.77.E+07            | 6.92.E+07            | 4.46.E+07               | 4.95.E+07               | 5.21.E+07               | 4.42.E+07               | 4.98.E+07               | 5.94.E+07               | 6.13.E+07               | 5.78.E+07               |
| 1581 | Q96K37-1  | Solute carrier family 35 member E1 [OS=Homo sapiens]                                          | 20.021           | 1.38.E+06            | 3.77.E+06            | 3.71.E+06            | 2.07.E+06            | 5.84.E+06               | 5.02.E+06               | 4.88.E+06               | 4.52.E+06               | 7.61.E+06               | 5.90.E+06               | 6.08.E+06               | 6.33.E+06               |
| 1582 | P00568    | Adenylate kinase isoenzyme 1 [OS=Homo sapiens]                                                | 19.994           | 3.02.E+07            | 2.62.E+07            | 2.83.E+07            | 2.15.E+07            | 3.50.E+07               | 3.53.E+07               | 5.78.E+07               | 3.29.E+07               | 4.76.E+07               | 6.06.E+07               | 5.40.E+07               | 5.49.E+07               |
| 1583 | O14907    | Tax1-binding protein 3 [OS=Homo sapiens]                                                      | 19.945           | 8.06.E+07            | 8.27.E+07            | 1.06.E+08            | 1.07.E+08            | 1.13.E+08               | 1.33.E+08               | 1.29.E+08               | 1.37.E+08               | 7.12.E+07               | 8.01.E+07               | 8.07.E+07               | 7.41.E+07               |
| 1584 | P16083    | Ribosyl-dihydroxynicotinamide dehydrogenase [quinone] [OS=Homo sapiens]                       | 19.907           | 2.73.E+07            | 2.65.E+07            | 2.36.E+07            | 2.97.E+07            | 2.76.E+07               | 2.54.E+07               | 2.35.E+07               | 2.21.E+07               | 1.78.E+07               | 9.99.E+06               | 1.03.E+07               | 1.30.E+07               |
| 1585 | Q9UIG0    | Tyrosine-protein kinase BAZ1B [OS=Homo sapiens]                                               | 19.861           | 6.45.E+07            | 6.82.E+07            | 5.84.E+07            | 5.80.E+07            | 5.76.E+07               | 5.53.E+07               | 5.44.E+07               | 5.55.E+07               | 5.95.E+07               | 5.12.E+07               | 4.97.E+07               | 4.84.E+07               |
| 1586 | P23258    | tubulin gamma-1 chain [OS=Homo sapiens]                                                       | 19.827           | 3.34.E+07            | 2.06.E+07            | 2.06.E+07            | 2.06.E+07            | 2.88.E+07               | 2.13.E+07               | 1.69.E+07               | 2.41.E+07               | 2.13.E+07               | 1.71.E+07               | 1.51.E+07               | 1.57.E+07               |
| 1587 | Q96T88    | E3 ubiquitin-protein ligase UHRF1 [OS=Homo sapiens]                                           | 19.816           | 4.91.E+07            | 6.20.E+07            | 7.21.E+07            | 6.87.E+07            | 6.55.E+07               | 7.46.E+07               | 7.22.E+07               | 7.86.E+07               | 4.40.E+07               | 4.78.E+07               | 4.63.E+07               | 4.35.E+07               |
| 1588 | Q5H9R7-1  | Serine/threonine-protein phosphatase 6 regulatory subunit 3 [OS=Homo sapiens]                 | 19.804           | 3.19.E+07            | 3.01.E+07            | 2.75.E+07            | 2.28.E+07            | 3.55.E+07               | 3.52.E+07               | 3.29.E+07               | 3.34.E+07               | 3.48.E+07               | 3.32.E+07               | 3.51.E+07               | 3.45.E+07               |
| 1589 | Q9NPF4    | Probable tRNA N6-adenosine threonylcarbamoyltransferase [OS=Homo sapiens]                     | 19.744           | 2.67.E+07            | 3.07.E+07            | 3.49.E+07            | 2.96.E+07            | 2.38.E+07               | 2.34.E+07               | 2.48.E+07               | 1.28.E+07               | 3.02.E+07               | 2.95.E+07               | 2.47.E+07               | 2.75.E+07               |
| 1590 | Q9GZP8-1  | Immortalization up-regulated protein [OS=Homo sapiens]                                        | 19.68            | 1.29.E+08            | 1.22.E+08            | 1.28.E+08            | 9.83.E+07            | 1.57.E+08               | 1.47.E+08               | 1.49.E+08               | 1.42.E+08               | 1.24.E+08               | 1.28.E+08               | 1.41.E+08               | 1.38.E+08               |
| 1591 | Q06481    | Amyloid-like protein 2 [OS=Homo sapiens]                                                      | 19.637           | 1.21.E+07            | 1.14.E+07            | 1.01.E+07            | 1.03.E+07            | 1.03.E+07               | 1.14.E+07               | 8.74.E+06               | 9.01.E+06               | 6.66.E+06               | 8.22.E+06               | 6.20.E+06               | 7.89.E+06               |
| 1592 | P35080-2  | Isoform 1b of Profilin-2 [OS=Homo sapiens]                                                    | 19.63            | 4.64.E+07            | 4.73.E+07            | 5.02.E+07            | 4.90.E+07            | 3.69.E+07               | 4.13.E+07               | 4.12.E+07               | 3.87.E+07               | 4.03.E+07               | 4.55.E+07               | 4.47.E+07               | 4.56.E+07               |

| No.  | Accession | Description                                                                                  | Sum PEP Score | CTRL Abundances_1 | CTRL Abundances_2 | CTRL Abundances_3 | CTRL Abundances_4 | CLDN6-1 Abundances_1 | CLDN6-1 Abundances_2 | CLDN6-1 Abundances_3 | CLDN6-1 Abundances_4 | CLDN6-2 Abundances_1 | CLDN6-2 Abundances_2 | CLDN6-2 Abundances_3 | CLDN6-2 Abundances_4 |
|------|-----------|----------------------------------------------------------------------------------------------|---------------|-------------------|-------------------|-------------------|-------------------|----------------------|----------------------|----------------------|----------------------|----------------------|----------------------|----------------------|----------------------|
| 1593 | Q9BUQ8    | Probable ATP-dependent RNA helicase DDX23 [OS=Homo sapiens]                                  | 19.584        | 2.20.E+07         | 2.43.E+07         | 2.41.E+07         | 2.90.E+07         | 2.23.E+07            | 2.22.E+07            | 2.26.E+07            | 2.38.E+07            | 2.61.E+07            | 2.33.E+07            | 2.48.E+07            | 2.47.E+07            |
| 1594 | Q8TDD1    | ATP-dependent RNA helicase DDX54 [OS=Homo sapiens]                                           | 19.559        | 3.12.E+07         | 3.51.E+07         | 3.66.E+07         | 3.65.E+07         | 2.94.E+07            | 3.12.E+07            | 3.15.E+07            | 3.55.E+07            | 1.59.E+07            | 2.42.E+07            | 1.84.E+07            | 1.54.E+07            |
| 1595 | P29353    | SHC-transforming protein 1 [OS=Homo sapiens]                                                 | 19.546        | 1.01.E+07         | 4.65.E+06         |                   | 2.95.E+06         | 5.45.E+05            |                      | 1.07.E+06            |                      | 5.45.E+05            |                      | 8.86.E+05            |                      |
| 1596 | O14964    | Hepatocyte growth factor-regulated tyrosine kinase substrate [OS=Homo sapiens]               | 19.522        | 2.31.E+07         | 2.87.E+07         | 2.58.E+07         | 2.63.E+07         | 2.71.E+07            | 3.91.E+07            | 3.77.E+07            | 3.78.E+07            | 3.75.E+07            | 3.53.E+07            | 3.71.E+07            | 3.35.E+07            |
| 1597 | Q71UM5    | 40S ribosomal protein S27-like [OS=Homo sapiens]                                             | 19.356        | 2.27.E+07         | 2.60.E+07         | 2.96.E+07         | 2.81.E+07         | 1.84.E+07            | 2.25.E+07            | 2.26.E+07            | 2.14.E+07            | 1.97.E+07            | 2.34.E+07            | 2.18.E+07            | 2.13.E+07            |
| 1598 | Q6P9B6    | TLD domain-containing protein 1 [OS=Homo sapiens]                                            | 19.315        | 9.83.E+06         | 9.10.E+06         | 6.46.E+06         | 9.26.E+06         | 9.71.E+06            | 8.15.E+06            | 9.71.E+06            | 1.11.E+07            | 1.88.E+07            | 1.92.E+07            | 2.05.E+07            | 2.60.E+07            |
| 1599 | Q5T0N5-1  | Formin-binding protein 1-like [OS=Homo sapiens]                                              | 19.263        | 3.94.E+07         | 3.84.E+07         | 3.45.E+07         | 4.14.E+07         | 3.64.E+07            | 3.54.E+07            | 3.58.E+07            | 3.29.E+07            | 3.52.E+07            | 4.30.E+07            | 4.68.E+07            | 4.54.E+07            |
| 1600 | Q8IWX8    | Calcium homeostasis endoplasmic reticulum protein [OS=Homo sapiens]                          | 19.259        | 3.51.E+07         | 4.04.E+07         | 1.75.E+07         | 3.31.E+07         | 3.55.E+07            | 3.16.E+07            | 1.72.E+07            | 2.52.E+07            | 1.55.E+07            | 2.17.E+07            | 8.91.E+06            | 2.56.E+07            |
| 1601 | Q95758    | polypyrimidine tract-binding protein 3 [OS=Homo sapiens]                                     | 19.258        | 4.36.E+07         | 4.31.E+07         | 4.23.E+07         | 3.18.E+07         | 6.14.E+07            | 5.59.E+07            | 5.21.E+07            | 3.63.E+07            | 5.08.E+07            | 5.27.E+07            | 6.76.E+07            | 5.11.E+07            |
| 1602 | Q9Y3C4    | EKC/KEOPS complex subunit TPRKB [OS=Homo sapiens]                                            | 19.247        | 4.21.E+07         | 3.94.E+07         | 3.86.E+07         | 4.17.E+07         | 3.45.E+07            | 3.20.E+07            | 2.50.E+07            | 3.31.E+07            | 3.37.E+07            | 3.58.E+07            | 3.66.E+07            | 3.89.E+07            |
| 1603 | O60610-1  | Protein diaphanous homolog 1 [OS=Homo sapiens]                                               | 19.178        | 2.17.E+07         | 1.97.E+07         | 2.14.E+07         | 2.08.E+07         | 2.63.E+07            | 2.40.E+07            | 2.49.E+07            | 2.34.E+07            | 2.31.E+07            | 2.05.E+07            | 2.28.E+07            | 2.28.E+07            |
| 1604 | P57076    | UPF0769 protein C21orf59 [OS=Homo sapiens]                                                   | 19.144        | 1.73.E+07         | 1.54.E+07         | 1.56.E+07         | 1.92.E+07         | 1.45.E+07            | 1.58.E+07            | 1.40.E+07            | 1.38.E+07            | 1.45.E+07            | 1.27.E+07            | 6.82.E+06            | 1.56.E+07            |
| 1605 | P21281    | V-type proton ATPase subunit B, brain isoform [OS=Homo sapiens]                              | 19.136        | 9.46.E+07         | 9.66.E+07         | 6.74.E+07         | 9.21.E+07         | 7.45.E+07            | 6.66.E+07            | 4.53.E+07            | 9.51.E+07            | 1.07.E+08            | 8.71.E+07            | 1.01.E+08            | 1.14.E+08            |
| 1606 | P11310-1  | medium-chain specific acyl-CoA dehydrogenase, mitochondrial [OS=Homo sapiens]                | 19.084        | 2.83.E+07         | 2.60.E+07         | 2.16.E+07         | 2.74.E+07         | 3.33.E+07            | 2.25.E+07            | 2.61.E+07            | 2.71.E+07            | 3.33.E+07            | 3.36.E+07            | 3.05.E+07            | 2.72.E+07            |
| 1607 | Q92896    | Golgi apparatus protein 1 [OS=Homo sapiens]                                                  | 19.044        | 3.03.E+07         | 2.46.E+07         | 2.54.E+07         | 3.18.E+07         | 2.15.E+07            | 2.38.E+07            | 2.27.E+07            | 2.40.E+07            | 3.65.E+07            | 3.19.E+07            | 3.13.E+07            | 3.28.E+07            |
| 1608 | Q7L576-1  | cytoplasmic FMR1-interacting protein 1 [OS=Homo sapiens]                                     | 19.019        | 2.96.E+07         | 3.15.E+07         | 3.03.E+07         | 3.26.E+07         | 3.19.E+07            | 3.25.E+07            | 3.20.E+07            | 3.39.E+07            | 3.29.E+07            | 3.10.E+07            | 3.39.E+07            | 3.48.E+07            |
| 1609 | P47914    | 60S ribosomal protein L29 [OS=Homo sapiens]                                                  | 19.016        | 1.60.E+08         | 1.69.E+08         | 1.78.E+08         | 2.04.E+08         | 2.24.E+08            | 2.14.E+08            | 2.17.E+08            | 2.18.E+08            | 1.76.E+08            | 1.77.E+08            | 1.70.E+08            | 1.68.E+08            |
| 1610 | Q96F86    | Enhancer of mRNA-decapping protein 3 [OS=Homo sapiens]                                       | 18.943        | 2.19.E+07         | 1.53.E+07         | 1.26.E+07         | 1.38.E+07         | 1.86.E+07            | 1.88.E+07            | 2.03.E+07            | 1.20.E+07            | 1.81.E+07            | 1.68.E+07            | 1.64.E+07            | 1.59.E+07            |
| 1611 | O75153    | Clustered mitochondria protein homolog [OS=Homo sapiens]                                     | 18.833        | 3.62.E+07         | 3.72.E+07         | 3.60.E+07         | 4.80.E+07         | 4.15.E+07            | 3.18.E+07            | 3.53.E+07            | 3.18.E+07            | 2.13.E+07            | 1.99.E+07            | 2.14.E+07            | 2.22.E+07            |
| 1612 | Q02880    | DNA topoisomerase 2-beta [OS=Homo sapiens]                                                   | 18.823        |                   | 1.15.E+07         |                   | 1.31.E+07         |                      |                      |                      |                      |                      |                      |                      |                      |
| 1613 | A0AV96    | RNA-binding protein 47 [OS=Homo sapiens]                                                     | 18.817        | 4.94.E+07         | 5.58.E+07         | 5.54.E+07         | 6.44.E+07         | 4.68.E+07            | 4.76.E+07            | 5.34.E+07            | 5.59.E+07            | 4.21.E+07            | 3.83.E+07            | 3.72.E+07            | 1.61.E+07            |
| 1614 | Q8NFU3-1  | Thiosulfate sulfurtransferase/rhodanese-like domain-containing protein 1 [OS=Homo sapiens]   | 18.813        | 7.36.E+07         | 5.29.E+07         | 5.98.E+07         | 2.52.E+07         | 9.56.E+07            | 9.71.E+07            | 1.03.E+08            | 9.61.E+07            | 6.66.E+07            | 5.73.E+07            | 4.04.E+07            | 4.12.E+07            |
| 1615 | Q15654-1  | thyroid receptor-interacting protein 6 [OS=Homo sapiens]                                     | 18.731        | 2.99.E+07         | 5.44.E+07         | 5.60.E+07         | 5.96.E+07         | 5.70.E+07            | 5.38.E+07            | 2.88.E+07            | 3.04.E+07            | 5.56.E+07            | 5.69.E+07            | 5.81.E+07            | 5.35.E+07            |
| 1616 | P30876    | DNA-directed RNA polymerase II subunit RPB2 [OS=Homo sapiens]                                | 18.652        | 7.13.E+07         | 5.37.E+07         | 7.56.E+07         | 6.83.E+07         | 4.60.E+07            | 4.37.E+07            | 4.26.E+07            | 4.74.E+07            | 7.73.E+07            | 7.08.E+07            | 6.31.E+07            | 6.12.E+07            |
| 1617 | P09496-2  | Isoform Non-brain of Clathrin light chain A [OS=Homo sapiens]                                | 18.563        | 1.79.E+08         | 1.87.E+08         | 1.82.E+08         | 1.73.E+08         | 1.62.E+08            | 1.55.E+08            | 1.65.E+08            | 1.71.E+08            | 2.26.E+08            | 2.18.E+08            | 2.22.E+08            | 2.11.E+08            |
| 1618 | O95487-1  | Protein transport protein Sec24B [OS=Homo sapiens]                                           | 18.537        | 2.58.E+07         | 2.83.E+07         | 3.23.E+07         | 3.49.E+07         | 2.46.E+07            | 3.09.E+07            | 3.11.E+07            | 3.24.E+07            | 3.10.E+07            | 4.47.E+07            | 3.14.E+07            | 4.33.E+07            |
| 1619 | O60828    | Polyglutamine-binding protein 1 [OS=Homo sapiens]                                            | 18.471        | 5.76.E+07         | 4.30.E+07         | 4.02.E+07         | 5.08.E+07         | 4.12.E+07            | 3.57.E+07            | 4.78.E+07            | 3.87.E+07            | 4.49.E+07            | 3.40.E+07            | 3.53.E+07            | 3.69.E+07            |
| 1620 | Q72794    | Keratin, type II cytoskeletal 1b [OS=Homo sapiens]                                           | 18.406        |                   |                   |                   |                   |                      |                      |                      |                      |                      |                      |                      |                      |
| 1621 | Q6P1J9    | Parafibromin [OS=Homo sapiens]                                                               | 18.4          | 1.99.E+07         | 1.52.E+07         | 1.87.E+07         | 1.87.E+07         | 1.66.E+07            | 1.55.E+07            | 1.16.E+07            | 1.24.E+07            | 1.34.E+07            | 1.55.E+07            | 1.71.E+07            | 1.73.E+07            |
| 1622 | P54687    | Branched-chain-amino-acid aminotransferase, cytosolic [OS=Homo sapiens]                      | 18.398        | 3.76.E+07         | 3.42.E+07         | 3.46.E+07         | 3.42.E+07         | 3.78.E+07            | 4.12.E+07            | 4.10.E+07            | 3.78.E+07            | 4.14.E+07            | 4.44.E+07            | 4.34.E+07            | 4.67.E+07            |
| 1623 | O76071    | Probable cytosolic iron-sulfur protein assembly protein Cioa1 [OS=Homo sapiens]              | 18.393        | 1.71.E+07         | 1.76.E+07         | 4.44.E+07         | 3.48.E+07         | 2.02.E+07            | 7.96.E+07            | 3.98.E+07            | 3.81.E+07            | 2.35.E+07            | 2.21.E+07            | 2.04.E+07            | 1.79.E+07            |
| 1624 | O14974    | Protein phosphatase 1 regulatory subunit 12A [OS=Homo sapiens]                               | 18.36         | 3.40.E+07         | 2.28.E+07         | 2.25.E+07         | 2.30.E+07         | 2.84.E+07            | 2.45.E+07            | 2.51.E+07            | 2.50.E+07            | 2.29.E+07            | 2.34.E+07            | 2.54.E+07            | 2.24.E+07            |
| 1625 | Q96GC9    | Vacuole membrane protein 1 [OS=Homo sapiens]                                                 | 18.344        | 3.78.E+07         | 3.29.E+07         | 3.17.E+07         | 3.40.E+07         | 1.53.E+07            | 3.77.E+07            | 1.60.E+07            | 3.03.E+07            | 3.89.E+07            | 3.93.E+07            | 3.32.E+07            | 3.48.E+07            |
| 1626 | Q6FI81-1  | Anamorsin [OS=Homo sapiens]                                                                  | 18.326        | 7.46.E+07         | 8.41.E+07         | 7.59.E+07         | 7.72.E+07         | 6.08.E+07            | 3.59.E+07            | 6.46.E+07            | 7.13.E+07            | 1.03.E+08            | 1.01.E+08            | 9.88.E+07            | 1.08.E+08            |
| 1627 | Q709C8    | Vacuolar protein sorting-associated protein 13C [OS=Homo sapiens]                            | 18.27         | 2.55.E+07         | 1.65.E+07         | 1.76.E+07         | 2.32.E+07         | 3.67.E+07            | 3.72.E+07            | 2.36.E+07            | 2.01.E+07            | 2.21.E+07            | 2.19.E+07            | 2.27.E+07            | 2.34.E+07            |
| 1628 | P15313    | V-type proton ATPase subunit B, kidney isoform [OS=Homo sapiens]                             | 18.218        | 1.96.E+07         | 1.90.E+07         | 1.91.E+07         | 1.93.E+07         | 1.65.E+07            | 1.49.E+07            | 1.65.E+07            | 1.53.E+07            | 6.52.E+06            | 7.70.E+06            | 9.25.E+06            | 1.20.E+07            |
| 1629 | P10253    | lysosomal alpha-glucosidase [OS=Homo sapiens]                                                | 18.176        | 3.32.E+07         | 3.10.E+07         | 3.60.E+07         | 3.57.E+07         | 2.73.E+07            | 2.72.E+07            | 2.36.E+07            | 1.59.E+07            | 3.41.E+07            | 3.18.E+07            | 3.10.E+07            | 2.31.E+07            |
| 1630 | P15374    | Ubiquitin carboxyl-terminal hydrolase isozyme L3 [OS=Homo sapiens]                           | 18.165        | 4.47.E+07         | 4.32.E+07         | 3.07.E+07         | 3.51.E+07         | 5.92.E+07            | 5.54.E+07            | 4.05.E+07            | 3.66.E+07            | 5.44.E+07            | 4.13.E+07            | 3.26.E+07            | 5.25.E+07            |
| 1631 | O43674-1  | NADH dehydrogenase [ubiquinone] 1 beta subcomplex subunit 5, mitochondrial [OS=Homo sapiens] | 18.046        | 5.38.E+07         | 4.97.E+07         | 4.49.E+07         | 5.20.E+07         | 4.63.E+07            | 5.01.E+07            | 4.58.E+07            | 4.30.E+07            | 3.98.E+07            | 2.39.E+07            | 4.84.E+07            | 4.41.E+07            |
| 1632 | Q14157-2  | Ubiquitin-associated protein 2-like [OS=Homo sapiens]                                        | 18.031        | 7.62.E+07         | 7.32.E+07         | 7.78.E+07         | 8.30.E+07         | 6.64.E+07            | 7.15.E+07            | 8.32.E+07            | 8.55.E+07            | 6.02.E+07            | 6.25.E+07            | 7.92.E+07            |                      |
| 1633 | P49721    | proteasome subunit beta type-2 [OS=Homo sapiens]                                             | 18.029        | 8.37.E+07         | 6.36.E+07         | 7.45.E+07         | 1.70.E+08         | 1.05.E+08            | 1.48.E+08            | 1.38.E+08            | 1.01.E+08            | 7.34.E+07            | 1.14.E+08            | 1.04.E+08            | 1.26.E+08            |
| 1634 | P50336    | protoporphyrinogen oxidase [OS=Homo sapiens]                                                 | 18.021        | 1.20.E+08         | 1.16.E+08         | 1.16.E+08         | 1.21.E+08         | 1.30.E+08            | 1.30.E+08            | 1.39.E+08            | 1.60.E+08            | 1.22.E+08            | 1.28.E+08            | 1.36.E+08            | 1.20.E+08            |
| 1635 | Q9GZT8-1  | NIF3-like protein 1 [OS=Homo sapiens]                                                        | 17.956        | 9.15.E+07         | 7.54.E+07         | 9.14.E+07         | 8.94.E+07         | 5.84.E+07            | 7.32.E+07            | 6.53.E+07            | 7.94.E+07            | 1.16.E+08            | 1.06.E+08            | 9.71.E+07            | 9.21.E+07            |
| 1636 | Q96B36    | Proline-rich AKT1 substrate 1 [OS=Homo sapiens]                                              | 17.934        | 9.32.E+06         | 8.29.E+06         | 2.86.E+07         | 4.70.E+07         | 1.37.E+07            | 4.04.E+07            | 1.45.E+07            | 1.15.E+07            | 2.62.E+06            | 4.17.E+07            | 4.25.E+07            | 2.16.E+07            |
| 1637 | P41240    | tyrosine-protein kinase CSK [OS=Homo sapiens]                                                | 17.902        | 4.64.E+07         | 4.80.E+07         | 4.69.E+07         | 5.24.E+07         | 4.88.E+07            | 4.66.E+07            | 4.97.E+07            | 4.50.E+07            | 5.31.E+07            | 5.22.E+07            | 5.23.E+07            | 5.42.E+07            |
| 1638 | Q00653-1  | Nuclear factor NF-kappa-B p100 subunit [OS=Homo sapiens]                                     | 17.899        | 5.38.E+07         | 3.39.E+07         | 4.35.E+07         | 4.31.E+07         | 5.26.E+07            | 5.36.E+07            | 2.49.E+07            | 4.35.E+07            | 1.79.E+07            | 3.66.E+07            | 2.88.E+07            | 1.74.E+07            |
| 1639 | Q9UNF1    | Melanoma-associated antigen D2 [OS=Homo sapiens]                                             | 17.814        | 3.46.E+07         | 2.16.E+07         | 2.73.E+07         | 2.49.E+07         | 3.49.E+07            | 3.28.E+07            | 4.11.E+07            | 4.28.E+07            | 5.44.E+07            | 5.48.E+07            | 4.65.E+07            | 2.81.E+07            |
| 1640 | Q96DV4    | 39S ribosomal protein L38, mitochondrial [OS=Homo sapiens]                                   | 17.771        | 6.76.E+07         | 7.65.E+07         | 7.70.E+07         | 6.91.E+07         | 6.29.E+07            | 6.53.E+07            | 6.31.E+07            | 4.71.E+07            | 6.72.E+07            | 6.98.E+07            | 7.12.E+07            | 6.51.E+07            |
| 1641 | P48729-1  | Casein kinase I isoform alpha [OS=Homo sapiens]                                              | 17.764        | 3.13.E+07         | 3.03.E+07         | 3.22.E+07         | 3.38.E+07         | 3.36.E+07            | 3.50.E+07            | 3.77.E+07            | 3.75.E+07            | 3.12.E+07            | 2.63.E+07            | 3.30.E+07            | 3.40.E+07            |
| 1642 | Q96C19    | EF-hand domain-containing protein D2 [OS=Homo sapiens]                                       | 17.762        | 7.75.E+07         | 5.70.E+07         | 4.68.E+07         | 6.94.E+07         | 9.20.E+07            | 8.68.E+07            | 7.52.E+07            | 6.18.E+07            | 8.28.E+07            | 6.23.E+07            | 6.83.E+07            | 6.44.E+07            |
| 1643 | O94874-1  | E3 UFM1-protein ligase 1 [OS=Homo sapiens]                                                   | 17.754        |                   |                   |                   | 2.84.E+06         |                      |                      |                      |                      |                      |                      |                      |                      |
| 1644 | O43615    | Mitochondrial import inner membrane translocase subunit TIM44 [OS=Homo sapiens]              | 17.743        | 2.69.E+07         | 2.36.E+07         | 2.67.E+07         | 2.96.E+07         | 2.86.E+07            | 2.51.E+07            | 3.19.E+07            | 2.95.E+07            | 3.20.E+07            | 3.43.E+07            | 3.26.E+07            | 3.21.E+07            |
| 1645 | Q16831    | uridine phosphorylase 1 [OS=Homo sapiens]                                                    | 17.735        | 4.50.E+07         | 4.69.E+07         | 4.88.E+07         | 5.10.E+07         | 8.27.E+07            | 8.94.E+07            | 9.04.E+07            | 9.75.E+07            | 5.26.E+07            | 4.85.E+07            | 5.09.E+07            | 5.09.E+07            |

| No.  | Accession | Description                                                                                      | Sum PEP Score | CTRL Abundances_1 | CTRL Abundances_2 | CTRL Abundances_3 | CTRL Abundances_4 | CLDN6-1 Abundances_1 | CLDN6-1 Abundances_2 | CLDN6-1 Abundances_3 | CLDN6-1 Abundances_4 | CLDN6-2 Abundances_1 | CLDN6-2 Abundances_2 | CLDN6-2 Abundances_3 | CLDN6-2 Abundances_4 |
|------|-----------|--------------------------------------------------------------------------------------------------|---------------|-------------------|-------------------|-------------------|-------------------|----------------------|----------------------|----------------------|----------------------|----------------------|----------------------|----------------------|----------------------|
| 1646 | Q8N766-1  | ER membrane protein complex subunit 1 [OS=Homo sapiens]                                          | 17.706        | 2.59.E+07         | 2.22.E+07         | 2.83.E+07         | 2.94.E+07         | 2.22.E+07            | 2.94.E+07            | 2.68.E+07            | 2.31.E+07            | 2.69.E+07            | 2.89.E+07            | 2.26.E+07            | 3.01.E+07            |
| 1647 | P50402    | Emerin [OS=Homo sapiens]                                                                         | 17.7          | 2.49.E+07         | 2.58.E+07         | 3.66.E+07         | 3.05.E+07         | 2.48.E+07            | 3.02.E+07            | 2.93.E+07            | 2.95.E+07            | 3.19.E+07            | 3.68.E+07            | 3.89.E+07            | 3.33.E+07            |
| 1648 | Q9BRP8    | Partner of Y14 and mago [OS=Homo sapiens]                                                        | 17.681        | 4.85.E+07         | 5.67.E+07         | 5.86.E+07         | 5.38.E+07         | 5.33.E+07            | 5.35.E+07            | 5.85.E+07            | 5.63.E+07            | 5.86.E+07            | 5.77.E+07            | 5.53.E+07            | 5.92.E+07            |
| 1649 | P41227-1  | N-alpha-acetyltransferase 10 [OS=Homo sapiens]                                                   | 17.676        | 1.00.E+08         | 3.04.E+07         | 4.96.E+07         | 4.99.E+07         | 8.59.E+07            | 3.78.E+07            | 4.04.E+07            | 2.67.E+07            | 7.88.E+07            | 3.98.E+07            | 4.63.E+07            | 5.10.E+07            |
| 1650 | P62330    | ADP-ribosylation factor 6 [OS=Homo sapiens]                                                      | 17.624        | 2.93.E+07         | 3.07.E+07         | 2.94.E+07         | 3.55.E+07         | 4.82.E+07            | 7.67.E+07            | 8.19.E+07            | 7.53.E+07            | 4.32.E+07            | 7.15.E+07            | 4.40.E+07            | 4.33.E+07            |
| 1651 | O60313    | Dynamin-like 120 kDa protein, mitochondrial [OS=Homo sapiens]                                    | 17.556        | 4.39.E+07         | 3.62.E+07         | 3.26.E+07         | 4.06.E+07         | 3.46.E+07            | 2.86.E+07            | 2.87.E+07            | 2.87.E+07            | 4.43.E+07            | 3.63.E+07            | 3.41.E+07            | 3.51.E+07            |
| 1652 | O95831-1  | Apoptosis-inducing factor 1, mitochondrial [OS=Homo sapiens]                                     | 17.497        | 2.94.E+07         | 3.51.E+07         | 3.35.E+07         | 2.97.E+07         | 2.79.E+07            | 2.36.E+07            | 2.95.E+07            | 2.72.E+07            | 3.75.E+07            | 3.31.E+07            | 3.94.E+07            | 3.66.E+07            |
| 1653 | Q9GZZ1-1  | N-alpha-acetyltransferase 50 [OS=Homo sapiens]                                                   | 17.495        | 5.23.E+07         | 5.15.E+07         | 6.03.E+07         | 5.98.E+07         | 5.60.E+07            | 5.48.E+07            | 6.15.E+07            | 5.83.E+07            | 5.71.E+07            | 5.75.E+07            | 5.41.E+07            | 4.88.E+07            |
| 1654 | Q9NV17    | ATPase family AAA domain-containing protein 3A [OS=Homo sapiens]                                 | 17.474        | 9.08.E+07         | 9.10.E+07         | 8.56.E+07         | 9.71.E+07         | 5.57.E+07            | 7.95.E+07            | 5.03.E+07            | 9.54.E+07            | 5.42.E+07            | 1.02.E+08            | 1.02.E+08            | 9.53.E+07            |
| 1655 | P49792    | E3 SUMO-protein ligase RanBP2 [OS=Homo sapiens]                                                  | 17.44         | 3.27.E+07         | 4.18.E+07         | 1.96.E+07         | 2.55.E+07         | 2.00.E+07            | 6.80.E+06            | 2.21.E+07            | 1.64.E+07            | 2.34.E+07            | 3.34.E+07            | 2.32.E+07            | 3.21.E+07            |
| 1656 | O14737    | Programmed cell death protein 5 [OS=Homo sapiens]                                                | 17.395        | 1.58.E+08         | 1.76.E+08         | 1.66.E+08         | 1.75.E+08         | 1.57.E+08            | 1.56.E+08            | 1.63.E+08            | 1.58.E+08            | 1.73.E+08            | 1.83.E+08            | 1.69.E+08            | 1.47.E+08            |
| 1657 | Q15125    | 3-beta-hydroxysteroid-delta(8),delta(7)-isomerase [OS=Homo sapiens]                              | 17.351        | 1.82.E+08         | 2.00.E+08         | 2.01.E+08         | 1.80.E+08         | 1.45.E+08            | 1.44.E+08            | 1.50.E+08            | 1.51.E+08            | 2.08.E+08            | 1.91.E+08            | 1.87.E+08            | 1.84.E+08            |
| 1658 | Q9Y2Q5    | Regulator complex protein LAMTOR2 [OS=Homo sapiens]                                              | 17.328        | 6.94.E+07         | 7.27.E+07         | 7.71.E+07         | 6.96.E+07         | 7.01.E+07            | 6.67.E+07            | 6.92.E+07            | 6.79.E+07            | 6.95.E+07            | 7.30.E+07            | 6.78.E+07            | 6.83.E+07            |
| 1659 | Q9NP79    | Vacuolar protein sorting-associated protein VTA1 homolog [OS=Homo sapiens]                       | 17.315        | 2.76.E+07         | 3.27.E+07         | 3.50.E+07         | 3.24.E+07         | 3.14.E+07            | 2.16.E+07            | 2.48.E+07            | 2.18.E+07            | 3.53.E+07            | 3.28.E+07            | 3.12.E+07            | 2.67.E+07            |
| 1660 | Q9UHY1    | Nuclear receptor-binding protein [OS=Homo sapiens]                                               | 17.305        | 1.57.E+07         | 1.16.E+07         | 1.25.E+07         | 1.86.E+07         | 1.20.E+07            | 1.14.E+07            | 1.19.E+07            | 1.06.E+07            | 1.35.E+07            | 1.55.E+07            | 1.05.E+07            | 9.65.E+06            |
| 1661 | O95456    | Proteasome assembly chaperone 1 [OS=Homo sapiens]                                                | 17.238        | 2.50.E+07         | 6.29.E+06         | 6.50.E+06         | 2.48.E+07         | 1.29.E+07            | 1.54.E+07            | 1.76.E+07            | 1.18.E+07            | 1.97.E+07            | 1.86.E+07            | 1.13.E+07            | 7.87.E+06            |
| 1662 | Q14692    | ribosome biogenesis protein BMS1 homolog [OS=Homo sapiens]                                       | 17.2          | 1.79.E+07         | 7.85.E+06         | 8.23.E+06         | 6.94.E+06         | 1.26.E+07            | 1.42.E+07            | 7.10.E+06            | 1.64.E+07            | 1.23.E+07            | 1.20.E+07            | 8.79.E+06            | 1.35.E+07            |
| 1663 | Q96C23    | aldose 1-epimerase [OS=Homo sapiens]                                                             | 17.194        | 4.84.E+07         | 4.28.E+07         | 5.01.E+07         | 5.81.E+07         | 2.57.E+07            | 2.98.E+07            | 2.44.E+07            | 2.94.E+07            | 6.20.E+07            | 8.82.E+07            | 7.70.E+07            | 6.65.E+07            |
| 1664 | Q9H6R4-1  | Nucleolar protein 6 [OS=Homo sapiens]                                                            | 17.119        | 6.02.E+07         | 5.68.E+07         | 5.99.E+07         | 6.97.E+07         | 6.31.E+07            | 6.79.E+07            | 6.65.E+07            | 6.91.E+07            | 6.19.E+07            | 6.50.E+07            | 6.83.E+07            | 7.59.E+07            |
| 1665 | P51970    | NADH dehydrogenase [ubiquinone] 1 alpha subcomplex subunit 8 [OS=Homo sapiens]                   | 17.075        | 3.05.E+07         | 3.85.E+07         | 3.38.E+07         | 3.56.E+07         | 3.35.E+07            | 2.81.E+07            | 3.30.E+07            | 3.47.E+07            | 3.29.E+07            | 3.11.E+07            | 2.70.E+07            | 2.89.E+07            |
| 1666 | Q9BY42    | protein RTF2 homolog [OS=Homo sapiens]                                                           | 17.051        | 1.17.E+07         | 1.49.E+07         | 1.26.E+07         | 1.44.E+07         | 1.28.E+07            | 1.16.E+07            | 1.11.E+07            | 1.35.E+07            | 1.13.E+07            | 1.29.E+07            | 9.85.E+06            | 1.01.E+07            |
| 1667 | P62861    | 40S ribosomal protein S30 [OS=Homo sapiens]                                                      | 17.033        | 6.08.E+08         | 6.43.E+08         | 6.32.E+08         | 6.24.E+08         | 5.90.E+08            | 5.95.E+08            | 6.20.E+08            | 6.50.E+08            | 6.53.E+08            | 6.15.E+08            | 6.10.E+08            | 6.02.E+08            |
| 1668 | O60907    | F-box-like/WD repeat-containing protein TBL1X [OS=Homo sapiens]                                  | 16.984        | 5.56.E+07         | 5.34.E+07         | 5.51.E+07         | 6.08.E+07         | 5.18.E+07            | 5.59.E+07            | 5.74.E+07            | 5.55.E+07            | 6.92.E+07            | 6.87.E+07            | 6.17.E+07            | 6.74.E+07            |
| 1669 | Q7Z5L9-1  | Interferon regulatory factor 2-binding protein 2 [OS=Homo sapiens]                               | 16.872        | 2.64.E+07         | 3.25.E+07         | 2.91.E+07         | 2.75.E+07         | 2.62.E+07            | 2.52.E+07            | 2.66.E+07            | 2.90.E+07            | 4.02.E+07            | 4.01.E+07            | 4.15.E+07            | 4.39.E+07            |
| 1670 | Q13616    | Cullin-1 [OS=Homo sapiens]                                                                       | 16.862        | 5.11.E+07         | 5.45.E+07         | 4.97.E+07         | 5.21.E+07         | 4.73.E+07            | 5.27.E+07            | 2.50.E+07            | 4.08.E+07            | 5.32.E+07            | 5.69.E+07            | 3.82.E+07            | 4.80.E+07            |
| 1671 | Q9UG63    | ATP-binding cassette sub-family F member 2 [OS=Homo sapiens]                                     | 16.861        | 6.07.E+07         | 5.89.E+07         | 5.93.E+07         | 5.05.E+07         | 5.27.E+07            | 4.58.E+07            | 4.80.E+07            | 4.98.E+07            | 5.31.E+07            | 4.42.E+07            | 4.69.E+07            | 4.60.E+07            |
| 1672 | Q969Q0    | 60S ribosomal protein L36a-like [OS=Homo sapiens]                                                | 16.846        | 9.00.E+07         | 9.82.E+07         | 1.02.E+08         | 1.15.E+08         | 1.32.E+08            | 1.33.E+08            | 1.35.E+08            | 1.31.E+08            | 9.20.E+07            | 8.98.E+07            | 8.64.E+07            | 8.19.E+07            |
| 1673 | Q9Y3T9    | Nucleolar complex protein 2 homolog [OS=Homo sapiens]                                            | 16.826        | 2.74.E+07         | 3.14.E+07         | 3.09.E+07         | 2.83.E+07         | 3.20.E+07            | 3.05.E+07            | 3.38.E+07            | 3.14.E+07            | 3.43.E+07            | 3.29.E+07            | 2.97.E+07            | 3.22.E+07            |
| 1674 | P49354    | protein farnesyltransferase/geranylgeranyltransferase type-1 subunit alpha [OS=Homo sapiens]     | 16.802        | 1.55.E+07         | 1.14.E+07         | 1.55.E+07         | 1.68.E+07         | 1.59.E+07            | 1.68.E+07            | 1.75.E+07            | 1.39.E+07            | 1.64.E+07            | 1.48.E+07            | 1.66.E+07            | 1.69.E+07            |
| 1675 | Q9H3N1    | Thioredoxin-related transmembrane protein 1 [OS=Homo sapiens]                                    | 16.794        | 9.06.E+07         | 9.81.E+07         | 9.28.E+07         | 1.05.E+08         | 1.34.E+08            | 1.14.E+08            | 1.36.E+08            | 1.15.E+08            | 1.26.E+08            | 1.14.E+08            | 1.46.E+08            | 1.18.E+08            |
| 1676 | Q8WVM8    | Sec1 family domain-containing protein 1 [OS=Homo sapiens]                                        | 16.697        | 3.65.E+07         | 3.02.E+07         | 3.30.E+07         | 2.71.E+07         | 2.70.E+07            | 3.05.E+07            | 3.05.E+07            | 2.84.E+07            | 3.40.E+07            | 3.65.E+07            | 4.00.E+07            | 3.91.E+07            |
| 1677 | P14678-1  | Small nuclear ribonucleoprotein-associated proteins B and B' [OS=Homo sapiens]                   | 16.67         | 5.35.E+08         | 5.24.E+08         | 5.10.E+08         | 5.23.E+08         | 5.14.E+08            | 5.09.E+08            | 4.77.E+08            | 4.97.E+08            | 5.65.E+08            | 5.04.E+08            | 5.45.E+08            | 5.44.E+08            |
| 1678 | Q8WX92    | Negative elongation factor B [OS=Homo sapiens]                                                   | 16.613        | 3.30.E+07         | 2.24.E+07         | 2.43.E+07         | 3.00.E+07         | 2.36.E+07            | 2.53.E+07            | 2.09.E+07            | 2.30.E+07            | 2.22.E+07            | 2.32.E+07            | 2.24.E+07            | 2.89.E+07            |
| 1679 | Q13555-6  | Isoform 6 of Calcium/calmodulin-dependent protein kinase type II subunit gamma [OS=Homo sapiens] | 16.604        | 2.83.E+07         | 1.02.E+07         | 1.03.E+07         | 1.10.E+07         | 3.89.E+07            | 9.08.E+06            | 4.02.E+07            | 9.01.E+06            | 3.57.E+07            | 9.84.E+06            | 1.05.E+07            | 3.62.E+07            |
| 1680 | P78310-1  | Coxsackievirus and adenovirus receptor [OS=Homo sapiens]                                         | 16.51         | 3.94.E+07         | 4.38.E+07         | 4.37.E+07         | 1.28.E+07         | 3.99.E+07            | 4.23.E+07            | 4.34.E+07            | 4.26.E+07            | 5.99.E+07            | 6.35.E+07            | 6.05.E+07            | 5.76.E+07            |
| 1681 | Q969S3    | Zinc finger protein 622 [OS=Homo sapiens]                                                        | 16.499        | 1.54.E+07         | 1.40.E+07         | 1.44.E+07         | 1.89.E+07         | 1.64.E+07            | 1.03.E+07            | 1.77.E+07            | 1.62.E+07            | 1.69.E+07            | 1.36.E+07            | 1.46.E+07            | 1.33.E+07            |
| 1682 | P36639    | 7,8-dihydro-8-oxoguanine triphosphatase [OS=Homo sapiens]                                        | 16.483        | 8.42.E+07         | 9.60.E+07         | 9.81.E+07         | 8.18.E+07         | 7.66.E+07            | 6.50.E+07            | 6.40.E+07            | 1.29.E+07            | 7.83.E+07            | 8.23.E+07            | 8.21.E+07            | 7.20.E+07            |
| 1683 | Q14141-1  | Septin-6 [OS=Homo sapiens]                                                                       | 16.455        | 1.68.E+07         | 1.67.E+07         | 1.95.E+07         | 1.30.E+07         | 1.71.E+07            | 1.38.E+07            | 1.68.E+07            | 1.66.E+07            | 2.02.E+07            | 1.75.E+07            | 1.51.E+07            | 1.83.E+07            |
| 1684 | Q5UIP0    | Telomere-associated protein RIF1 [OS=Homo sapiens]                                               | 16.265        | 1.24.E+07         | 1.16.E+07         | 1.08.E+07         | 6.87.E+06         | 1.13.E+07            | 1.09.E+07            | 1.05.E+07            | 1.46.E+07            | 9.43.E+06            | 1.00.E+07            | 9.88.E+06            | 9.15.E+06            |
| 1685 | Q96D17    | U5 small nuclear ribonucleoprotein 40 kDa protein [OS=Homo sapiens]                              | 16.234        | 2.32.E+07         | 4.97.E+07         | 2.21.E+07         | 4.69.E+07         | 6.76.E+07            | 2.41.E+07            | 2.26.E+07            | 6.82.E+07            | 2.38.E+07            | 5.47.E+07            | 2.35.E+07            | 2.08.E+07            |
| 1686 | Q9NWH9-1  | SAFB-like transcription modulator [OS=Homo sapiens]                                              | 16.224        | 2.35.E+07         | 2.54.E+07         | 3.11.E+07         | 3.56.E+07         | 1.80.E+07            | 2.94.E+07            | 1.75.E+07            | 2.95.E+07            | 2.10.E+07            | 2.95.E+07            | 3.13.E+07            | 1.84.E+07            |
| 1687 | Q9BRP1    | Programmed cell death protein 2-like [OS=Homo sapiens]                                           | 16.078        | 5.21.E+07         | 4.01.E+07         | 3.40.E+07         | 4.97.E+07         | 5.22.E+07            | 5.04.E+07            | 5.17.E+07            | 3.04.E+07            | 4.93.E+07            | 4.10.E+07            | 5.83.E+07            | 6.10.E+07            |
| 1688 | Q9UBM7    | 7-dehydrocholesterol reductase [OS=Homo sapiens]                                                 | 16.056        | 6.07.E+07         | 6.41.E+07         | 6.90.E+07         | 7.06.E+07         | 8.75.E+07            | 9.39.E+07            | 9.00.E+07            | 9.92.E+07            | 6.29.E+07            | 7.10.E+07            | 7.40.E+07            | 7.03.E+07            |
| 1689 | Q9H993    | protein-glutamate O-methyltransferase [OS=Homo sapiens]                                          | 16.027        | 1.03.E+07         | 7.93.E+06         | 9.02.E+06         | 8.62.E+06         | 1.14.E+07            | 1.28.E+07            | 1.14.E+07            | 8.93.E+06            | 8.86.E+06            | 1.04.E+07            | 7.68.E+06            | 9.15.E+06            |
| 1690 | Q9H4A6    | Golgi phosphoprotein 3 [OS=Homo sapiens]                                                         | 16.011        | 9.54.E+06         | 6.22.E+06         | 7.40.E+06         | 5.36.E+06         | 7.15.E+06            | 5.76.E+06            | 5.97.E+06            | 5.74.E+06            | 4.50.E+06            | 4.49.E+06            | 5.58.E+06            | 5.83.E+06            |
| 1691 | Q9BTW9    | Tubulin-specific chaperone D [OS=Homo sapiens]                                                   | 15.933        | 2.76.E+07         | 2.91.E+07         | 3.03.E+07         | 2.79.E+07         | 2.73.E+07            | 3.27.E+07            | 3.78.E+07            | 3.78.E+07            | 2.99.E+07            | 3.12.E+07            | 2.53.E+07            | 2.28.E+07            |
| 1692 | Q00534    | Cyclin-dependent kinase 6 [OS=Homo sapiens]                                                      | 15.876        | 2.35.E+07         | 3.91.E+07         | 4.02.E+07         | 5.03.E+07         | 3.57.E+07            | 3.86.E+07            | 4.30.E+07            | 3.82.E+07            | 2.39.E+07            | 4.26.E+07            | 4.21.E+07            | 4.38.E+07            |
| 1693 | Q9UDW1    | cytochrome b-c1 complex subunit 9 [OS=Homo sapiens]                                              | 15.823        | 7.29.E+07         | 4.26.E+07         | 6.66.E+07         | 7.00.E+07         | 3.81.E+07            | 4.69.E+07            | 4.61.E+07            | 4.13.E+07            | 5.31.E+07            | 4.45.E+07            | 4.12.E+07            | 4.02.E+07            |
| 1694 | Q92979    | Ribosomal RNA small subunit methyltransferase Nep1 [OS=Homo sapiens]                             | 15.806        | 1.75.E+07         | 1.93.E+07         | 2.47.E+07         | 2.12.E+07         | 2.02.E+07            | 2.69.E+07            | 2.63.E+07            | 2.44.E+07            | 1.57.E+07            | 1.89.E+07            | 2.14.E+07            | 4.37.E+07            |
| 1695 | Q07065    | Cytoskeleton-associated protein 4 [OS=Homo sapiens]                                              | 15.716        | 2.47.E+07         | 9.79.E+06         | 1.15.E+07         | 8.38.E+06         | 3.32.E+07            | 2.70.E+07            | 2.94.E+07            | 2.87.E+07            | 2.77.E+07            | 1.05.E+07            | 1.14.E+07            | 2.06.E+07            |
| 1696 | O15344-1  | E3 ubiquitin-protein ligase Midline-1 [OS=Homo sapiens]                                          | 15.692        | 1.99.E+07         | 1.97.E+07         | 2.34.E+07         | 2.05.E+07         | 2.10.E+07            | 2.18.E+07            | 2.54.E+07            | 2.42.E+07            | 3.10.E+07            | 3.71.E+07            | 3.68.E+07            | 3.08.E+07            |
| 1697 | Q8NBX0    | saccharopine dehydrogenase-like oxidoreductase [OS=Homo sapiens]                                 | 15.675        | 3.70.E+06         | 2.46.E+06         |                   | 4.41.E+06         | 5.08.E+06            | 2.95.E+06            | 2.11.E+06            |                      | 7.04.E+06            | 3.74.E+06            |                      |                      |

| No.  | Accession | Description                                                                                          | Sum PEP Score | CTRL Abundances_1 | CTRL Abundances_2 | CTRL Abundances_3 | CTRL Abundances_4 | CLDN6-1 Abundances_1 | CLDN6-1 Abundances_2 | CLDN6-1 Abundances_3 | CLDN6-1 Abundances_4 | CLDN6-2 Abundances_1 | CLDN6-2 Abundances_2 | CLDN6-2 Abundances_3 | CLDN6-2 Abundances_4 |
|------|-----------|------------------------------------------------------------------------------------------------------|---------------|-------------------|-------------------|-------------------|-------------------|----------------------|----------------------|----------------------|----------------------|----------------------|----------------------|----------------------|----------------------|
| 1698 | O95297-1  | Myelin protein zero-like protein 1 [OS=Homo sapiens]                                                 | 15.673        | 1.99.E+07         | 1.77.E+07         | 2.27.E+07         | 2.02.E+07         | 2.58.E+07            | 2.43.E+07            | 2.26.E+07            | 2.39.E+07            | 1.80.E+07            | 1.73.E+07            | 1.80.E+07            | 1.62.E+07            |
| 1699 | Q15020    | Squamous cell carcinoma antigen recognized by T-cells 3 [OS=Homo sapiens]                            | 15.671        | 1.36.E+07         | 1.12.E+07         | 9.73.E+06         | 1.43.E+07         | 1.08.E+07            | 1.31.E+07            | 1.13.E+07            | 1.17.E+07            | 7.76.E+06            | 9.30.E+06            | 1.12.E+07            | 1.08.E+07            |
| 1700 | Q15287-1  | RNA-binding protein with serine-rich domain 1 [OS=Homo sapiens]                                      | 15.654        | 7.25.E+07         | 7.11.E+07         | 7.02.E+07         | 6.77.E+07         | 6.03.E+07            | 6.33.E+07            | 6.52.E+07            | 6.73.E+07            | 7.59.E+07            | 7.34.E+07            | 7.44.E+07            | 7.05.E+07            |
| 1701 | O43464    | Serine protease HTRA2, mitochondrial [OS=Homo sapiens]                                               | 15.628        | 1.10.E+06         | 1.35.E+06         | 3.02.E+05         | 1.15.E+06         | 1.93.E+06            | 1.00.E+06            | 7.96.E+05            | 6.19.E+05            | 1.40.E+06            | 6.65.E+05            |                      | 3.61.E+05            |
| 1702 | Q14657    | EKC/KEOPS complex subunit LAGE3 [OS=Homo sapiens]                                                    | 15.628        | 2.57.E+07         | 3.22.E+07         | 3.37.E+07         | 3.39.E+07         | 2.16.E+07            | 2.48.E+07            | 2.28.E+07            | 2.70.E+07            | 2.67.E+07            | 2.69.E+07            | 2.63.E+07            | 2.99.E+07            |
| 1703 | Q00577    | Transcriptional activator protein Pur-alpha [OS=Homo sapiens]                                        | 15.628        | 2.10.E+07         | 1.85.E+07         | 2.28.E+07         | 1.88.E+07         | 9.44.E+06            | 1.02.E+07            | 1.83.E+07            | 1.94.E+07            | 2.25.E+07            | 2.08.E+07            | 2.16.E+07            | 2.12.E+07            |
| 1704 | Q8NDC0    | MAPK-interacting and spindle-stabilizing protein-like OS=Homo sapiens OX=9606 GN=MAPK1IP1L PE=1 SV=4 | 15.628        | 4.58.E+07         | 4.72.E+07         | 4.58.E+07         | 4.27.E+07         | 4.07.E+07            | 4.09.E+07            | 4.29.E+07            | 3.82.E+07            | 4.52.E+07            | 5.08.E+07            | 4.70.E+07            | 4.68.E+07            |
| 1705 | O14732-1  | inositol monophosphatase 2 [OS=Homo sapiens]                                                         | 15.628        |                   |                   |                   |                   |                      |                      |                      |                      |                      |                      |                      |                      |
| 1706 | P33240    | cleavage stimulation factor subunit 2 [OS=Homo sapiens]                                              | 15.628        | 2.02.E+07         | 1.67.E+07         | 1.68.E+07         | 8.17.E+06         | 1.61.E+07            | 1.70.E+07            | 1.69.E+07            | 9.88.E+06            | 1.68.E+07            | 1.64.E+07            | 6.75.E+06            | 1.69.E+07            |
| 1707 | Q15651-1  | High mobility group nucleosome-binding domain-containing protein 3 [OS=Homo sapiens]                 | 15.628        | 2.93.E+07         | 2.91.E+07         | 2.95.E+07         | 3.79.E+07         | 2.71.E+07            | 2.75.E+07            | 2.69.E+07            | 2.45.E+07            | 2.13.E+07            | 2.17.E+07            | 2.13.E+07            | 2.23.E+07            |
| 1708 | Q9P000-1  | COMM domain-containing protein 9 [OS=Homo sapiens]                                                   | 15.628        | 9.24.E+06         | 5.82.E+06         | 6.97.E+06         | 8.01.E+06         | 7.16.E+06            | 8.10.E+06            | 8.66.E+06            | 7.59.E+06            | 6.92.E+06            | 8.62.E+06            | 7.05.E+06            | 5.89.E+06            |
| 1709 | Q9H9C1-1  | Spermatogenesis-defective protein 39 homolog [OS=Homo sapiens]                                       | 15.628        | 7.42.E+06         |                   | 3.28.E+06         |                   | 5.40.E+06            | 1.84.E+06            |                      | 3.24.E+06            |                      |                      |                      |                      |
| 1710 | P60602    | Reactive oxygen species modulator 1 OS=Homo sapiens OX=9606 GN=ROMO1 PE=1 SV=1                       | 15.628        | 1.01.E+08         | 1.04.E+08         | 1.06.E+08         | 1.00.E+08         | 9.22.E+07            | 1.08.E+08            | 1.10.E+08            | 9.54.E+07            | 1.09.E+08            | 1.15.E+08            | 1.13.E+08            | 1.09.E+08            |
| 1711 | Q9Y3D0    | Mitotic spindle-associated MMXD complex subunit MIP18 [OS=Homo sapiens]                              | 15.628        | 2.76.E+07         | 2.84.E+07         | 3.34.E+07         | 3.29.E+07         | 2.56.E+07            | 2.98.E+07            | 2.76.E+07            | 2.84.E+07            | 2.95.E+07            | 4.00.E+07            | 3.80.E+07            | 3.61.E+07            |
| 1712 | Q969X5    | Endoplasmic reticulum-Golgi intermediate compartment protein 1 [OS=Homo sapiens]                     | 15.628        | 1.89.E+07         | 1.73.E+07         |                   | 1.80.E+07         | 1.60.E+07            |                      |                      |                      | 2.60.E+07            |                      |                      | 2.93.E+07            |
| 1713 | Q9P0J7    | E3 ubiquitin-protein ligase KCMF1 [OS=Homo sapiens]                                                  | 15.628        | 1.03.E+07         | 7.57.E+06         | 7.67.E+06         | 8.01.E+06         | 8.91.E+06            | 8.36.E+06            | 7.83.E+06            | 7.18.E+06            | 7.45.E+06            | 7.60.E+06            | 6.61.E+06            | 6.82.E+06            |
| 1714 | Q9UKN8    | General transcription factor 3C polypeptide 4 [OS=Homo sapiens]                                      | 15.628        | 2.03.E+06         |                   |                   |                   |                      |                      |                      |                      |                      |                      | 1.52.E+06            |                      |
| 1715 | Q86U38    | Nucleolar protein 9 [OS=Homo sapiens]                                                                | 15.628        | 7.46.E+06         | 9.64.E+06         | 9.23.E+06         | 8.27.E+06         |                      |                      |                      |                      | 9.03.E+06            | 7.04.E+06            | 8.62.E+06            | 8.54.E+06            |
| 1716 | O94901-1  | SUN domain-containing protein 1 [OS=Homo sapiens]                                                    | 15.628        | 3.82.E+06         | 4.00.E+06         | 5.27.E+06         | 7.35.E+06         | 3.44.E+06            | 4.11.E+06            | 3.74.E+06            | 4.27.E+06            | 7.97.E+06            | 8.34.E+06            | 7.06.E+06            | 6.53.E+06            |
| 1717 | O75629    | Protein CREG1 [OS=Homo sapiens]                                                                      | 15.628        | 4.23.E+07         | 4.06.E+07         | 4.20.E+07         | 4.57.E+07         | 4.72.E+07            | 4.18.E+07            | 4.51.E+07            | 4.27.E+07            | 2.64.E+07            | 2.54.E+07            | 2.77.E+07            | 2.70.E+07            |
| 1718 | Q96EK6    | glucosamine 6-phosphate N-acetyltransferase [OS=Homo sapiens]                                        | 15.628        | 5.66.E+07         | 4.98.E+07         | 6.18.E+07         | 5.96.E+07         | 4.62.E+07            | 4.72.E+07            | 4.43.E+07            | 4.60.E+07            | 6.42.E+07            | 6.98.E+07            | 6.70.E+07            | 7.83.E+07            |
| 1719 | P57735    | ras-related protein Rab-25 [OS=Homo sapiens]                                                         | 15.628        | 7.79.E+06         | 8.87.E+06         | 8.65.E+06         | 7.84.E+06         | 5.18.E+06            | 6.90.E+06            | 5.72.E+06            | 5.71.E+06            | 7.10.E+06            | 9.48.E+06            | 1.12.E+07            | 7.40.E+06            |
| 1720 | O43818    | U3 small nucleolar RNA-interacting protein 2 [OS=Homo sapiens]                                       | 15.628        | 1.26.E+07         | 4.32.E+06         | 8.15.E+06         | 7.82.E+05         | 4.74.E+06            | 7.55.E+06            | 4.59.E+06            | 6.87.E+06            | 5.21.E+06            | 6.72.E+06            | 2.87.E+06            | 2.18.E+06            |
| 1721 | Q15397    | Pumilio homolog 3 [OS=Homo sapiens]                                                                  | 15.628        | 2.86.E+07         | 2.36.E+07         | 2.75.E+07         | 2.39.E+07         | 3.11.E+07            | 2.98.E+07            | 3.26.E+07            | 3.02.E+07            | 2.26.E+07            | 2.45.E+07            | 2.36.E+07            | 2.33.E+07            |
| 1722 | Q9Y2R9    | 28S ribosomal protein S7, mitochondrial [OS=Homo sapiens]                                            | 15.628        | 2.11.E+07         | 2.09.E+07         | 2.70.E+07         | 2.44.E+07         | 1.98.E+07            | 2.07.E+07            | 1.78.E+07            | 2.00.E+07            | 1.72.E+07            | 2.50.E+07            | 2.44.E+07            | 2.39.E+07            |
| 1723 | P17676    | CCAAT/enhancer-binding protein beta [OS=Homo sapiens]                                                | 15.628        | 1.33.E+07         | 1.40.E+07         | 1.46.E+07         | 1.55.E+07         | 1.38.E+07            | 1.58.E+07            | 1.44.E+07            | 1.47.E+07            | 1.17.E+07            | 1.45.E+07            | 1.48.E+07            | 1.50.E+07            |
| 1724 | Q92917    | G patch domain and KOW motifs-containing protein [OS=Homo sapiens]                                   | 15.628        |                   |                   |                   |                   |                      |                      |                      |                      |                      |                      |                      |                      |
| 1725 | Q12962    | transcription initiation factor TFIID subunit 10 [OS=Homo sapiens]                                   | 15.628        | 4.78.E+06         | 5.06.E+06         | 5.07.E+06         | 3.81.E+06         | 2.66.E+06            | 3.76.E+06            | 2.92.E+06            | 2.40.E+06            | 2.01.E+06            | 3.47.E+06            | 3.00.E+06            | 3.69.E+06            |
| 1726 | P18827    | syndecan-1 [OS=Homo sapiens]                                                                         | 15.628        |                   |                   |                   |                   |                      |                      |                      |                      |                      |                      |                      |                      |
| 1727 | Q9NVM6    | DnaJ homolog subfamily C member 17 [OS=Homo sapiens]                                                 | 15.628        | 1.48.E+07         | 1.29.E+07         | 1.47.E+07         | 1.27.E+07         | 1.30.E+07            | 1.34.E+07            | 1.35.E+07            | 1.29.E+07            | 1.22.E+07            | 1.24.E+07            | 1.35.E+07            | 1.38.E+07            |
| 1728 | P54725-1  | UV excision repair protein RAD23 homolog A [OS=Homo sapiens]                                         | 15.628        | 2.75.E+07         | 1.69.E+07         | 1.80.E+07         | 2.75.E+07         | 1.49.E+07            | 1.65.E+07            | 1.80.E+07            | 1.61.E+07            | 1.83.E+07            | 2.08.E+07            | 2.06.E+07            | 2.38.E+07            |
| 1729 | Q5TAQ9-1  | DDB1- and CUL4-associated factor 8 [OS=Homo sapiens]                                                 | 15.628        | 3.49.E+06         | 3.95.E+06         | 4.87.E+06         | 3.60.E+06         | 2.77.E+06            | 2.90.E+06            | 1.40.E+06            | 1.85.E+06            | 4.34.E+06            | 7.04.E+06            | 4.53.E+06            | 5.82.E+06            |
| 1730 | O43678    | NADH dehydrogenase [ubiquinone] 1 alpha subcomplex subunit 2 [OS=Homo sapiens]                       | 15.628        | 1.40.E+07         | 1.60.E+07         | 1.44.E+07         | 1.22.E+07         | 1.42.E+07            | 1.00.E+07            | 5.94.E+06            | 1.16.E+07            | 1.28.E+07            | 1.17.E+07            | 1.12.E+07            | 8.07.E+06            |
| 1731 | Q96HQ2-1  | CDKN2AIP N-terminal-like protein [OS=Homo sapiens]                                                   | 15.628        |                   |                   |                   |                   |                      |                      |                      |                      |                      |                      |                      |                      |
| 1732 | O95372    | acyl-protein thioesterase 2 [OS=Homo sapiens]                                                        | 15.618        | 2.84.E+07         |                   | 2.63.E+07         | 3.98.E+06         | 3.13.E+07            | 3.04.E+07            | 8.31.E+06            | 3.38.E+07            | 1.59.E+06            | 7.65.E+06            | 2.21.E+06            | 4.98.E+06            |
| 1733 | O43290    | U4/U6.U5 tri-snRNP-associated protein 1 [OS=Homo sapiens]                                            | 15.617        | 2.33.E+07         | 3.49.E+07         | 2.64.E+07         | 3.20.E+07         | 1.96.E+07            | 2.49.E+07            | 2.46.E+07            | 3.04.E+07            | 2.29.E+07            | 2.33.E+07            | 2.56.E+07            | 2.29.E+07            |
| 1734 | Q9H9Q2    | COP9 signalosome complex subunit 7b [OS=Homo sapiens]                                                | 15.571        | 1.31.E+07         | 1.37.E+07         | 1.16.E+07         | 1.58.E+07         | 1.45.E+07            | 1.74.E+07            | 1.95.E+07            | 1.84.E+07            | 1.46.E+07            | 1.73.E+07            | 2.04.E+07            | 2.08.E+07            |
| 1735 | Q9H444    | Charged multivesicular body protein 4b [OS=Homo sapiens]                                             | 15.559        | 1.56.E+07         | 1.74.E+07         | 1.95.E+07         | 1.76.E+07         | 1.80.E+07            | 5.78.E+07            | 5.42.E+07            | 1.82.E+07            | 4.84.E+07            | 1.73.E+07            | 4.68.E+07            | 4.30.E+07            |
| 1736 | P49750-4  | Isoform 4 of YLP motif-containing protein 1 [OS=Homo sapiens]                                        | 15.554        | 2.19.E+07         | 2.52.E+07         | 2.82.E+07         | 2.91.E+07         | 2.10.E+07            | 2.59.E+07            | 2.63.E+07            | 2.63.E+07            | 2.71.E+07            | 3.05.E+07            | 3.20.E+07            | 2.78.E+07            |
| 1737 | P06280    | alpha-galactosidase A [OS=Homo sapiens]                                                              | 15.539        | 5.88.E+07         | 6.57.E+07         | 5.26.E+07         | 6.23.E+07         | 2.34.E+07            | 2.59.E+07            | 3.26.E+07            | 2.48.E+07            | 4.23.E+07            | 4.60.E+07            | 4.15.E+07            | 4.22.E+07            |
| 1738 | Q9H336    | Cysteine-rich secretory protein LCCL domain-containing 1 [OS=Homo sapiens]                           | 15.535        | 1.05.E+07         | 8.43.E+06         | 8.12.E+06         | 8.77.E+06         | 1.06.E+07            | 1.05.E+07            | 6.49.E+06            | 6.22.E+06            | 1.00.E+07            | 1.36.E+07            | 1.48.E+07            | 1.65.E+07            |
| 1739 | Q04941-1  | proteolipid protein 2 [OS=Homo sapiens]                                                              | 15.49         | 1.12.E+08         | 3.12.E+08         | 3.24.E+08         | 1.18.E+08         | 4.06.E+08            | 4.15.E+08            | 4.14.E+08            | 4.09.E+08            | 3.48.E+08            | 3.46.E+08            | 3.56.E+08            | 1.11.E+08            |
| 1740 | Q9P0V9    | sepin-10 [OS=Homo sapiens]                                                                           | 15.464        | 4.20.E+07         | 3.49.E+07         | 3.05.E+07         | 2.94.E+07         | 4.11.E+07            | 3.36.E+07            | 3.06.E+07            | 3.09.E+07            | 2.99.E+07            | 3.11.E+07            | 4.06.E+07            |                      |
| 1741 | Q05519    | serine/arginine-rich splicing factor 11 [OS=Homo sapiens]                                            | 15.423        | 9.60.E+07         | 9.26.E+07         | 9.60.E+07         | 9.60.E+07         | 7.99.E+07            | 8.05.E+07            | 8.29.E+07            | 7.73.E+07            | 8.89.E+07            | 8.61.E+07            | 8.90.E+07            | 9.93.E+07            |
| 1742 | Q08499-1  | cAMP-specific 3',5'-cyclic phosphodiesterase 4D [OS=Homo sapiens]                                    | 15.366        | 1.33.E+07         | 2.13.E+07         | 1.56.E+07         | 1.78.E+07         | 1.03.E+07            | 9.61.E+06            | 9.62.E+06            | 1.42.E+07            | 1.01.E+07            | 8.58.E+06            | 1.29.E+07            | 1.14.E+07            |
| 1743 | Q9NPQ8    | Synembryn-A [OS=Homo sapiens]                                                                        | 15.328        | 4.64.E+07         | 4.93.E+07         | 4.45.E+07         | 3.79.E+07         | 4.28.E+07            | 5.31.E+07            | 5.41.E+07            | 4.65.E+07            | 5.73.E+07            | 5.85.E+07            | 5.68.E+07            | 5.05.E+07            |
| 1744 | P09669    | Cytochrome c oxidase subunit 6C [OS=Homo sapiens]                                                    | 15.292        | 1.59.E+08         | 1.66.E+08         | 1.71.E+08         | 1.74.E+08         | 1.60.E+08            | 1.63.E+08            | 1.63.E+08            | 1.43.E+08            | 1.39.E+08            | 1.38.E+08            | 1.36.E+08            |                      |
| 1745 | P18077    | 60S ribosomal protein L35a [OS=Homo sapiens]                                                         | 15.264        | 4.42.E+08         | 4.66.E+08         | 4.98.E+08         | 4.70.E+08         | 4.72.E+08            | 5.03.E+08            | 5.39.E+08            | 5.61.E+08            | 4.29.E+08            | 4.80.E+08            | 4.45.E+08            | 4.68.E+08            |
| 1746 | P43304    | Glycerol-3-phosphate dehydrogenase, mitochondrial [OS=Homo sapiens]                                  | 15.251        | 7.47.E+07         | 7.39.E+07         | 8.24.E+07         | 1.06.E+08         | 6.67.E+07            | 8.42.E+07            | 8.89.E+07            | 7.16.E+07            | 8.78.E+07            | 7.87.E+07            | 7.94.E+07            | 1.01.E+08            |
| 1747 | Q96EK5    | KIF1-binding protein [OS=Homo sapiens]                                                               | 15.234        | 2.56.E+07         | 2.86.E+07         | 4.99.E+07         | 3.43.E+07         | 2.37.E+07            | 2.39.E+07            | 2.06.E+07            | 2.79.E+07            | 3.17.E+07            | 3.48.E+07            | 3.21.E+07            | 3.33.E+07            |

| No.  | Accession | Description                                                                     | Sum PEP Score | CTRL Abundances_1 | CTRL Abundances_2 | CTRL Abundances_3 | CTRL Abundances_4 | CLDN6-1 Abundances_1 | CLDN6-1 Abundances_2 | CLDN6-1 Abundances_3 | CLDN6-1 Abundances_4 | CLDN6-2 Abundances_1 | CLDN6-2 Abundances_2 | CLDN6-2 Abundances_3 | CLDN6-2 Abundances_4 |
|------|-----------|---------------------------------------------------------------------------------|---------------|-------------------|-------------------|-------------------|-------------------|----------------------|----------------------|----------------------|----------------------|----------------------|----------------------|----------------------|----------------------|
| 1748 | O43252    | bifunctional 3'-phosphoadenosine 5'-phosphosulfate synthase 1 [OS=Homo sapiens] | 15.213        | 3.85.E+07         | 2.50.E+07         | 2.52.E+07         | 2.92.E+07         | 3.02.E+07            | 2.06.E+07            | 3.34.E+07            | 1.90.E+07            | 4.10.E+07            | 2.80.E+07            | 3.67.E+07            | 3.68.E+07            |
| 1749 | Q9GZP9    | Derlin-2 [OS=Homo sapiens]                                                      | 15.183        | 2.66.E+07         | 2.42.E+07         | 2.74.E+07         | 2.16.E+07         | 2.21.E+07            | 2.34.E+07            | 2.27.E+07            | 1.99.E+07            | 1.90.E+07            | 8.33.E+06            | 6.78.E+06            | 4.34.E+06            |
| 1750 | O43837-1  | isocitrate dehydrogenase [NAD] subunit beta, mitochondrial [OS=Homo sapiens]    | 15.173        | 6.02.E+07         | 6.97.E+07         | 6.17.E+07         | 6.24.E+07         | 7.32.E+07            | 6.97.E+07            | 6.81.E+07            | 6.71.E+07            | 6.23.E+07            | 6.40.E+07            | 6.50.E+07            | 6.09.E+07            |
| 1751 | P55145    | Mesencephalic astrocyte-derived neurotrophic factor [OS=Homo sapiens]           | 15.169        | 1.13.E+08         | 1.13.E+08         | 1.33.E+08         | 9.55.E+07         | 1.35.E+08            | 1.40.E+08            | 1.41.E+08            | 1.52.E+08            | 3.16.E+07            | 7.92.E+07            | 8.32.E+07            | 8.70.E+07            |
| 1752 | P46934-4  | Isoform 4 of E3 ubiquitin-protein ligase NEDD4 [OS=Homo sapiens]                | 15.157        | 2.57.E+07         | 1.94.E+07         | 1.53.E+07         | 2.24.E+07         | 2.59.E+07            | 2.53.E+07            | 2.15.E+07            | 1.82.E+07            | 1.12.E+07            | 1.78.E+07            | 1.12.E+07            | 2.01.E+07            |
| 1753 | Q8WWM7-1  | ataxin-2-like protein [OS=Homo sapiens]                                         | 15.093        | 5.63.E+07         | 5.54.E+07         | 6.52.E+07         | 6.06.E+07         | 5.23.E+07            | 5.61.E+07            | 5.00.E+07            | 5.79.E+07            | 4.94.E+07            | 6.51.E+07            | 6.38.E+07            | 6.53.E+07            |
| 1754 | Q53T59    | HCLS1-binding protein 3 [OS=Homo sapiens]                                       | 15.079        | 5.83.E+06         | 5.46.E+06         | 5.12.E+06         |                   |                      | 5.88.E+06            |                      |                      | 6.54.E+06            |                      |                      |                      |
| 1755 | Q9BY32-1  | Inosine triphosphate pyrophosphatase [OS=Homo sapiens]                          | 15.07         | 2.95.E+07         | 3.34.E+07         | 3.26.E+07         | 3.17.E+07         | 3.12.E+07            | 2.83.E+07            | 2.95.E+07            | 2.73.E+07            | 4.36.E+07            | 4.25.E+07            | 4.24.E+07            | 3.99.E+07            |
| 1756 | Q9GZP4    | PITH domain-containing protein 1 [OS=Homo sapiens]                              | 15.039        | 9.12.E+07         | 8.92.E+07         | 9.25.E+07         | 1.18.E+08         | 1.01.E+08            | 1.08.E+08            | 1.32.E+08            | 1.27.E+08            | 9.99.E+07            | 1.14.E+08            | 1.12.E+08            | 1.05.E+08            |
| 1757 | Q9H7B2    | Ribosome production factor 2 homolog [OS=Homo sapiens]                          | 15.022        | 2.75.E+07         | 2.71.E+07         | 2.33.E+07         | 3.01.E+07         | 3.66.E+07            | 3.58.E+07            | 3.25.E+07            | 3.42.E+07            | 3.33.E+07            | 3.17.E+07            | 2.98.E+07            | 3.54.E+07            |
| 1758 | Q9H488-1  | GDP-fucose protein O-fucosyltransferase 1 [OS=Homo sapiens]                     | 14.929        | 6.72.E+07         | 7.08.E+07         | 7.45.E+07         | 6.52.E+07         | 5.61.E+07            | 5.24.E+07            | 5.73.E+07            | 4.42.E+07            | 6.36.E+07            | 6.21.E+07            | 6.45.E+07            | 6.07.E+07            |
| 1759 | P09001    | 39S ribosomal protein L3, mitochondrial [OS=Homo sapiens]                       | 14.923        | 4.51.E+07         | 4.82.E+07         | 4.24.E+07         | 4.39.E+07         | 3.46.E+07            | 3.50.E+07            | 3.65.E+07            | 3.71.E+07            | 4.32.E+07            | 3.66.E+07            | 3.77.E+07            | 3.94.E+07            |
| 1760 | P04004    | Vitronectin [OS=Homo sapiens]                                                   | 14.919        | 4.25.E+07         | 3.24.E+07         | 3.63.E+07         | 4.89.E+07         | 5.49.E+07            | 5.89.E+07            | 6.10.E+07            | 4.88.E+07            | 6.41.E+07            | 7.10.E+07            | 5.89.E+07            | 8.50.E+07            |
| 1761 | P49959    | Double-strand break repair protein MRE11 [OS=Homo sapiens]                      | 14.856        | 3.86.E+07         | 2.52.E+07         | 3.26.E+07         | 3.08.E+07         | 1.82.E+07            | 2.98.E+07            | 2.14.E+07            | 1.89.E+07            | 4.61.E+07            | 2.42.E+07            | 1.71.E+07            | 2.41.E+07            |
| 1762 | Q9Y679-2  | Isoform Short of Ancient ubiquitous protein 1 [OS=Homo sapiens]                 | 14.846        | 2.12.E+07         | 1.03.E+07         | 2.53.E+07         | 2.33.E+07         | 1.69.E+07            | 1.19.E+07            | 2.47.E+07            | 1.17.E+07            | 1.81.E+07            | 2.35.E+07            | 2.02.E+07            | 2.69.E+07            |
| 1763 | P39210    | Protein Mpv17 [OS=Homo sapiens]                                                 | 14.841        | 5.72.E+06         | 4.27.E+06         | 5.11.E+06         | 4.96.E+06         | 3.55.E+06            | 4.63.E+06            | 4.90.E+06            | 5.03.E+06            | 5.18.E+06            | 5.29.E+06            | 7.43.E+06            | 7.14.E+06            |
| 1764 | Q9NUJ1    | Mycophenolic acid acyl-glucuronide esterase, mitochondrial [OS=Homo sapiens]    | 14.817        | 8.66.E+06         | 4.38.E+06         | 5.70.E+06         | 1.03.E+07         | 8.90.E+06            | 9.81.E+06            | 7.58.E+06            | 6.56.E+06            | 8.34.E+06            | 1.28.E+07            | 1.11.E+07            | 1.07.E+07            |
| 1765 | Q9P015    | 39S ribosomal protein L15, mitochondrial [OS=Homo sapiens]                      | 14.809        | 2.09.E+07         | 1.87.E+07         | 1.94.E+07         | 2.05.E+07         | 1.62.E+07            | 1.34.E+07            | 1.48.E+07            | 1.70.E+07            | 1.68.E+07            | 1.80.E+07            | 1.68.E+07            | 2.06.E+07            |
| 1766 | Q9UHL4    | Dipeptidyl peptidase 2 [OS=Homo sapiens]                                        | 14.797        | 2.06.E+07         | 2.32.E+07         | 2.43.E+07         | 2.54.E+07         | 2.24.E+07            | 2.47.E+07            | 2.22.E+07            | 2.52.E+07            | 2.21.E+07            | 2.47.E+07            | 2.44.E+07            | 2.09.E+07            |
| 1767 | Q9Y3B2    | Exosome complex component csl4 [OS=Homo sapiens]                                | 14.792        | 8.82.E+06         | 9.15.E+06         | 9.61.E+06         | 9.85.E+06         | 8.60.E+06            | 9.26.E+06            | 8.35.E+06            | 9.06.E+06            | 8.15.E+06            | 8.24.E+06            | 9.26.E+06            | 8.83.E+06            |
| 1768 | Q13617-1  | Cullin-2 [OS=Homo sapiens]                                                      | 14.791        | 8.88.E+07         | 8.68.E+07         | 9.91.E+07         | 9.42.E+07         | 8.33.E+07            | 9.68.E+07            | 9.15.E+07            | 8.40.E+07            | 1.03.E+08            | 1.08.E+08            | 8.85.E+07            | 1.04.E+08            |
| 1769 | Q86T07    | Histone-lysine N-methyltransferase setd3 [OS=Homo sapiens]                      | 14.763        | 5.73.E+07         | 3.45.E+07         | 3.23.E+07         | 3.87.E+07         | 3.35.E+07            | 3.21.E+07            | 3.59.E+07            | 3.03.E+07            | 3.30.E+07            | 3.40.E+07            | 3.37.E+07            | 3.75.E+07            |
| 1770 | Q9NRV9    | Heme-binding protein 1 [OS=Homo sapiens]                                        | 14.761        | 1.43.E+07         | 2.30.E+07         | 1.87.E+07         | 2.62.E+07         | 2.56.E+07            | 2.69.E+07            | 2.90.E+07            | 3.18.E+07            | 3.66.E+07            | 2.61.E+07            | 3.17.E+07            | 3.35.E+07            |
| 1771 | Q9Y3E5    | Peptidyl-tRNA hydrolase 2, mitochondrial [OS=Homo sapiens]                      | 14.748        | 1.01.E+08         | 3.35.E+07         | 4.72.E+07         | 4.30.E+07         | 5.21.E+07            | 3.13.E+07            | 6.35.E+07            | 2.91.E+07            | 4.39.E+07            | 5.56.E+07            | 5.81.E+07            | 6.11.E+07            |
| 1772 | Q93008-3  | Probable ubiquitin carboxyl-terminal hydrolase FAF-X [OS=Homo sapiens]          | 14.714        | 2.36.E+06         | 5.50.E+05         | 1.06.E+06         | 9.03.E+05         |                      |                      |                      |                      |                      |                      | 1.90.E+06            |                      |
| 1773 | Q92552    | 28S ribosomal protein S27, mitochondrial [OS=Homo sapiens]                      | 14.688        | 3.70.E+07         | 4.35.E+07         | 8.65.E+07         | 4.14.E+07         | 3.46.E+07            | 3.29.E+07            | 3.40.E+07            | 4.26.E+07            | 7.41.E+07            | 8.71.E+07            | 8.65.E+07            | 5.55.E+07            |
| 1774 | P49207    | 60S ribosomal protein L34 [OS=Homo sapiens]                                     | 14.647        | 7.39.E+08         | 7.32.E+08         | 8.26.E+08         | 8.21.E+08         | 7.77.E+08            | 8.05.E+08            | 7.78.E+08            | 8.68.E+08            | 6.78.E+08            | 7.72.E+08            | 8.02.E+08            | 7.96.E+08            |
| 1775 | Q9NQP4    | Prefoldin subunit 4 [OS=Homo sapiens]                                           | 14.613        | 7.76.E+07         | 8.73.E+07         | 8.36.E+07         | 8.22.E+07         | 7.18.E+07            | 7.21.E+07            | 7.42.E+07            | 6.74.E+07            | 9.25.E+07            | 9.38.E+07            | 8.56.E+07            | 8.94.E+07            |
| 1776 | Q05682-1  | Caldesmon [OS=Homo sapiens]                                                     | 14.605        | 3.74.E+07         | 3.90.E+07         | 4.62.E+07         | 4.31.E+07         | 4.59.E+07            | 3.79.E+07            | 3.43.E+07            | 4.63.E+07            | 4.98.E+07            | 7.17.E+07            | 6.22.E+07            | 5.96.E+07            |
| 1777 | Q14160    | protein scribble homolog [OS=Homo sapiens]                                      | 14.595        | 1.97.E+07         | 1.60.E+07         | 1.26.E+07         | 1.53.E+07         | 1.61.E+07            | 1.22.E+07            | 1.36.E+07            | 9.90.E+06            | 1.48.E+07            | 1.04.E+07            | 1.33.E+07            | 1.40.E+07            |
| 1778 | Q9BST9    | Rhotekin [OS=Homo sapiens]                                                      | 14.536        | 1.22.E+07         | 2.18.E+07         | 2.18.E+07         | 1.80.E+07         | 2.74.E+07            |                      |                      |                      | 1.94.E+07            | 1.77.E+07            |                      |                      |
| 1779 | Q14817    | Tetraspanin-4 [OS=Homo sapiens]                                                 | 14.52         | 2.02.E+07         | 1.39.E+07         | 7.18.E+06         | 1.91.E+07         | 1.58.E+07            | 6.34.E+06            | 6.86.E+06            | 1.41.E+07            | 1.53.E+07            | 1.64.E+07            | 1.43.E+07            | 1.54.E+07            |
| 1780 | Q92542-1  | Nicastroin [OS=Homo sapiens]                                                    | 14.487        | 9.04.E+07         | 7.50.E+07         | 7.52.E+07         | 9.27.E+07         | 9.36.E+07            | 9.21.E+07            | 9.06.E+07            | 6.33.E+07            | 9.50.E+07            | 8.74.E+07            | 8.92.E+07            | 4.66.E+07            |
| 1781 | P11233    | Ras-related protein Ral-A [OS=Homo sapiens]                                     | 14.468        | 4.34.E+07         | 4.30.E+07         | 4.17.E+07         | 4.08.E+07         | 4.68.E+07            | 4.53.E+07            | 4.35.E+07            | 4.06.E+07            | 4.52.E+07            | 4.40.E+07            | 4.75.E+07            | 4.81.E+07            |
| 1782 | O96005-1  | Cleft lip and palate transmembrane protein 1 [OS=Homo sapiens]                  | 14.441        | 1.11.E+07         | 1.13.E+07         | 1.14.E+07         | 1.44.E+07         | 1.77.E+07            | 2.15.E+07            | 1.96.E+07            | 2.20.E+07            | 1.25.E+07            | 2.07.E+07            | 1.68.E+07            | 1.61.E+07            |
| 1783 | P18583-5  | Isoform D of Protein SON [OS=Homo sapiens]                                      | 14.442        | 1.71.E+07         | 1.70.E+07         | 1.65.E+07         | 1.52.E+07         | 1.28.E+07            | 1.38.E+07            | 1.32.E+07            | 1.39.E+07            | 1.33.E+07            | 1.50.E+07            | 1.54.E+07            | 1.01.E+07            |
| 1784 | Q12756    | Kinesin-like protein KIF1A [OS=Homo sapiens]                                    | 14.364        | 5.91.E+07         | 5.38.E+07         | 5.79.E+07         | 4.96.E+07         | 4.79.E+07            | 4.90.E+07            | 5.90.E+07            | 5.91.E+07            | 4.38.E+07            | 4.37.E+07            | 4.43.E+07            | 4.90.E+07            |
| 1785 | Q5JT29    | alanine--tRNA ligase, mitochondrial [OS=Homo sapiens]                           | 14.363        | 1.00.E+07         | 9.72.E+06         | 1.12.E+07         | 1.25.E+07         | 7.72.E+06            | 9.87.E+06            | 8.89.E+06            | 9.45.E+06            | 8.71.E+06            | 9.24.E+06            | 9.53.E+06            | 8.97.E+06            |
| 1786 | Q9Y3Y2    | Chromatin target of PRMT1 protein [OS=Homo sapiens]                             | 14.35         | 4.02.E+06         | 3.40.E+06         | 3.23.E+06         | 3.65.E+06         | 5.30.E+06            | 4.90.E+06            | 4.98.E+06            | 4.51.E+06            | 3.86.E+06            | 3.82.E+06            | 3.54.E+06            | 2.78.E+06            |
| 1787 | Q9BW27    | nuclear pore complex protein Nup85 [OS=Homo sapiens]                            | 14.325        | 3.28.E+07         | 2.68.E+07         | 2.49.E+07         | 6.60.E+06         | 3.56.E+07            | 5.04.E+07            | 3.12.E+07            | 2.14.E+07            | 2.55.E+07            | 2.37.E+07            | 3.12.E+07            | 2.56.E+07            |
| 1788 | Q9GZT9-1  | Egl nine homolog 1 [OS=Homo sapiens]                                            | 14.324        | 1.17.E+07         | 1.37.E+07         | 1.28.E+07         | 1.34.E+07         | 1.09.E+07            | 1.17.E+07            | 1.24.E+07            | 1.28.E+07            | 1.16.E+07            | 1.55.E+07            | 1.46.E+07            | 1.33.E+07            |
| 1789 | Q9P0J0    | NADH dehydrogenase [ubiquinone] 1 alpha subcomplex subunit 13 [OS=Homo sapiens] | 14.321        | 1.08.E+08         | 1.01.E+08         | 1.02.E+08         | 9.87.E+07         | 9.26.E+07            | 9.35.E+07            | 9.74.E+07            | 9.20.E+07            | 9.30.E+07            | 9.54.E+07            | 9.79.E+07            | 1.09.E+08            |
| 1790 | Q9HA77    | probable cysteine--tRNA ligase, mitochondrial [OS=Homo sapiens]                 | 14.312        |                   | 2.42.E+06         |                   | 1.48.E+06         | 2.41.E+06            | 3.61.E+06            | 1.31.E+06            | 1.49.E+06            | 1.01.E+06            |                      |                      |                      |
| 1791 | Q9NZN4    | EH domain-containing protein 2 [OS=Homo sapiens]                                | 14.298        | 8.26.E+06         | 7.42.E+06         | 8.54.E+06         | 1.04.E+07         | 1.14.E+07            | 7.16.E+06            | 1.58.E+07            | 4.72.E+06            | 1.63.E+07            | 1.29.E+07            | 1.34.E+07            | 1.59.E+07            |
| 1792 | O75351    | Vacuolar protein sorting-associated protein 4B [OS=Homo sapiens]                | 14.262        | 5.50.E+07         | 4.79.E+07         | 4.93.E+07         | 5.95.E+07         | 5.67.E+07            | 5.93.E+07            | 5.18.E+07            | 5.16.E+07            | 5.15.E+07            | 5.23.E+07            | 4.88.E+07            | 4.64.E+07            |
| 1793 | Q99986    | Serine/threonine-protein kinase VRK1 [OS=Homo sapiens]                          | 14.261        | 4.37.E+07         | 4.10.E+07         | 4.14.E+07         | 4.27.E+07         | 2.29.E+07            | 4.12.E+07            | 4.43.E+07            | 4.23.E+07            | 4.15.E+07            | 3.94.E+07            | 3.91.E+07            | 3.97.E+07            |
| 1794 | Q13753-1  | Laminin subunit gamma-2 [OS=Homo sapiens]                                       | 14.258        | 7.19.E+06         | 1.45.E+07         | 1.59.E+07         | 2.33.E+07         | 2.50.E+07            | 2.31.E+07            | 2.81.E+07            | 2.54.E+07            | 1.32.E+07            | 2.53.E+07            | 2.17.E+07            | 1.97.E+07            |
| 1795 | O43708    | maleylacetoacetate isomerase [OS=Homo sapiens]                                  | 14.258        | 4.65.E+06         | 4.97.E+07         | 5.13.E+07         | 4.72.E+07         | 5.34.E+07            | 4.96.E+07            | 4.85.E+07            | 4.86.E+07            | 5.94.E+07            | 5.70.E+07            | 5.88.E+07            | 6.23.E+07            |
| 1796 | Q13098    | COP9 signalosome complex subunit 1 [OS=Homo sapiens]                            | 14.225        | 8.47.E+07         | 8.04.E+07         | 1.19.E+08         | 1.19.E+08         | 9.00.E+07            | 1.07.E+08            | 1.06.E+08            | 1.08.E+08            | 8.53.E+07            | 6.68.E+07            | 8.27.E+07            | 7.26.E+07            |
| 1797 | P29992    | guanine nucleotide-binding protein subunit alpha-11 [OS=Homo sapiens]           | 14.175        | 1.72.E+07         | 2.39.E+07         | 1.38.E+07         | 1.80.E+07         | 2.88.E+07            | 1.99.E+07            | 2.81.E+07            | 1.68.E+07            | 1.34.E+07            | 1.99.E+07            | 1.45.E+07            | 1.55.E+07            |
| 1798 | Q724V5    | Hepatoma-derived growth factor-related protein 2 [OS=Homo sapiens]              | 14.164        |                   | 1.27.E+07         |                   | 1.37.E+07         | 1.32.E+07            |                      |                      |                      | 4.15.E+06            | 1.94.E+07            | 1.65.E+07            | 1.84.E+07            |
| 1799 | Q92764    | Keratin, type I cuticular Ha5 [OS=Homo sapiens]                                 | 14.124        | 1.93.E+05         |                   |                   |                   | 2.76.E+05            | 2.52.E+05            | 2.30.E+05            |                      | 2.42.E+05            | 2.22.E+05            | 2.52.E+05            | 3.58.E+04            |
| 1800 | Q63HN8-3  | E3 ubiquitin-protein ligase RNF213 [OS=Homo sapiens]                            | 14.104        | 6.46.E+06         | 8.48.E+05         | 1.49.E+07         | 1.21.E+07         | 1.67.E+07            | 1.14.E+07            | 1.12.E+07            | 1.50.E+07            | 1.14.E+07            | 7.36.E+06            | 1.41.E+07            | 1.22.E+07            |
| 1801 | O00193    | Small acidic protein [OS=Homo sapiens]                                          | 14.1          | 2.26.E+07         | 2.27.E+07         | 1.85.E+07         | 1.78.E+07         | 1.67.E+07            | 1.43.E+07            | 1.43.E+07            | 1.45.E+07            | 2.09.E+07            | 2.14.E+07            | 1.71.E+07            | 1.79.E+07            |

| No.  | Accession | Description                                                                                   | Sum PEP Score | CTRL Abundances_1 | CTRL Abundances_2 | CTRL Abundances_3 | CTRL Abundances_4 | CLDN6-1 Abundances_1 | CLDN6-1 Abundances_2 | CLDN6-1 Abundances_3 | CLDN6-1 Abundances_4 | CLDN6-2 Abundances_1 | CLDN6-2 Abundances_2 | CLDN6-2 Abundances_3 | CLDN6-2 Abundances_4 |
|------|-----------|-----------------------------------------------------------------------------------------------|---------------|-------------------|-------------------|-------------------|-------------------|----------------------|----------------------|----------------------|----------------------|----------------------|----------------------|----------------------|----------------------|
| 1802 | Q9Y5J7    | Mitochondrial import inner membrane translocase subunit Tim9 [OS=Homo sapiens]                | 14.094        | 3.73.E+07         | 4.23.E+07         | 3.78.E+07         | 4.85.E+07         | 4.32.E+07            | 4.25.E+07            | 4.51.E+07            | 4.52.E+07            | 4.42.E+07            | 4.50.E+07            | 4.23.E+07            | 4.19.E+07            |
| 1803 | Q9UMS0    | NFU1 iron-sulfur cluster scaffold homolog, mitochondrial [OS=Homo sapiens]                    | 14.089        | 1.39.E+07         | 2.71.E+07         | 1.80.E+07         | 2.23.E+07         | 2.38.E+07            |                      | 1.59.E+07            | 9.15.E+06            | 2.05.E+07            | 1.84.E+07            |                      | 2.89.E+07            |
| 1804 | O00479    | High mobility group nucleosome-binding domain-containing protein 4 [OS=Homo sapiens]          | 14.085        |                   |                   |                   |                   |                      |                      |                      |                      |                      |                      |                      |                      |
| 1805 | Q13618    | Cullin-3 [OS=Homo sapiens]                                                                    | 14.034        | 3.71.E+07         | 4.09.E+07         | 1.61.E+07         | 2.49.E+07         | 2.19.E+07            | 5.18.E+07            | 4.84.E+07            | 5.55.E+07            | 2.64.E+07            | 4.53.E+07            | 2.77.E+07            | 4.48.E+07            |
| 1806 | O00203-1  | AP-3 complex subunit beta-1 [OS=Homo sapiens]                                                 | 13.995        | 7.27.E+07         | 6.76.E+07         | 7.72.E+07         | 7.24.E+07         | 8.10.E+07            | 8.21.E+07            | 8.53.E+07            | 8.76.E+07            | 6.00.E+07            | 6.58.E+07            | 6.49.E+07            | 6.48.E+07            |
| 1807 | Q9NWS0-1  | PIH1 domain-containing protein 1 [OS=Homo sapiens]                                            | 13.934        | 2.11.E+07         | 2.51.E+07         | 1.94.E+07         | 2.34.E+07         | 2.59.E+07            | 2.54.E+07            | 2.61.E+07            | 2.61.E+07            | 2.90.E+07            | 2.45.E+07            | 2.42.E+07            | 2.33.E+07            |
| 1808 | P05114    | Non-histone chromosomal protein HMG-14 [OS=Homo sapiens]                                      | 13.926        | 1.75.E+07         | 1.75.E+07         | 1.94.E+07         | 2.37.E+07         | 2.89.E+07            | 2.05.E+07            | 2.02.E+07            | 1.84.E+07            | 1.21.E+07            | 1.20.E+07            | 1.18.E+07            | 1.26.E+07            |
| 1809 | P09543-1  | 2',3'-cyclic-nucleotide 3'-phosphodiesterase [OS=Homo sapiens]                                | 13.924        | 2.14.E+07         | 1.19.E+07         | 1.88.E+07         |                   | 1.75.E+07            | 9.38.E+06            |                      | 1.93.E+07            | 1.29.E+07            | 1.31.E+07            | 1.75.E+07            | 1.85.E+07            |
| 1810 | P67812    | Signal peptidase complex catalytic subunit SEC11A [OS=Homo sapiens]                           | 13.918        | 1.45.E+08         | 1.39.E+08         | 1.35.E+08         | 1.30.E+08         | 1.40.E+08            | 1.36.E+08            | 1.38.E+08            | 1.39.E+08            | 1.55.E+08            | 1.46.E+08            | 1.48.E+08            | 1.58.E+08            |
| 1811 | P19387    | DNA-directed RNA polymerase II subunit RPB3 [OS=Homo sapiens]                                 | 13.887        | 1.87.E+07         | 1.41.E+07         | 1.62.E+07         | 1.62.E+07         | 1.35.E+07            | 1.53.E+07            | 1.51.E+07            | 1.39.E+07            | 1.13.E+07            | 1.53.E+07            | 1.42.E+07            | 1.45.E+07            |
| 1812 | O96011-1  | Peroxisomal membrane protein 11B [OS=Homo sapiens]                                            | 13.877        | 5.71.E+07         | 6.17.E+07         | 5.72.E+07         | 5.41.E+07         | 4.67.E+07            | 4.42.E+07            | 5.45.E+06            | 5.33.E+07            | 7.76.E+07            | 7.50.E+07            | 7.80.E+07            | 7.30.E+07            |
| 1813 | O15027-1  | Protein transport protein Sec16A [OS=Homo sapiens]                                            | 13.857        | 8.02.E+06         |                   |                   |                   |                      |                      |                      |                      |                      |                      |                      |                      |
| 1814 | Q9Y5Y2    | Cytosolic Fe-S cluster assembly factor NUBP2 [OS=Homo sapiens]                                | 13.845        | 4.05.E+07         | 2.46.E+07         | 2.47.E+07         | 4.03.E+07         | 2.39.E+07            | 2.45.E+07            | 2.45.E+07            | 2.00.E+07            | 3.89.E+07            | 2.68.E+07            | 3.97.E+07            | 4.65.E+07            |
| 1815 | Q9BYD2    | 39S ribosomal protein L9, mitochondrial [OS=Homo sapiens]                                     | 13.826        | 2.16.E+07         | 1.96.E+07         | 2.36.E+07         | 2.44.E+07         | 1.73.E+07            | 1.90.E+07            | 2.14.E+07            | 2.17.E+07            | 1.92.E+07            | 2.46.E+07            | 2.20.E+07            | 2.10.E+07            |
| 1816 | Q9NX14-1  | NADH dehydrogenase [ubiquinone] 1 beta subcomplex subunit 11, mitochondrial [OS=Homo sapiens] | 13.824        | 2.02.E+07         | 1.93.E+07         | 1.94.E+07         | 1.57.E+07         | 1.41.E+07            |                      | 7.57.E+06            | 1.58.E+07            | 2.62.E+07            | 2.35.E+07            |                      |                      |
| 1817 | O95394    | phosphoacetylglucosamine mutase [OS=Homo sapiens]                                             | 13.791        | 1.84.E+08         | 1.74.E+08         | 1.88.E+08         | 1.82.E+08         | 1.61.E+08            | 1.63.E+08            | 1.76.E+08            | 1.92.E+08            | 1.79.E+08            | 1.65.E+08            | 2.04.E+08            | 2.17.E+08            |
| 1818 | Q9H223    | EH domain-containing protein 4 [OS=Homo sapiens]                                              | 13.786        | 2.22.E+07         | 2.51.E+07         | 2.64.E+07         | 2.43.E+07         | 2.77.E+07            | 2.77.E+07            | 2.76.E+07            | 2.87.E+07            | 3.11.E+07            | 2.83.E+07            | 2.83.E+07            | 2.84.E+07            |
| 1819 | Q9C0B1-1  | alpha-ketoglutarate-dependent dioxygenase FTO [OS=Homo sapiens]                               | 13.779        | 2.13.E+07         | 1.79.E+07         | 1.89.E+07         | 2.02.E+07         | 1.89.E+07            | 1.74.E+07            | 1.88.E+07            | 1.61.E+07            | 2.06.E+07            | 2.10.E+07            | 1.90.E+07            | 2.51.E+07            |
| 1820 | Q6RW13    | Type-1 angiotensin II receptor-associated protein [OS=Homo sapiens]                           | 13.779        | 1.77.E+07         | 1.20.E+07         | 1.96.E+07         | 1.94.E+07         | 1.63.E+07            | 1.65.E+07            | 1.14.E+07            | 1.07.E+07            | 2.05.E+07            | 1.45.E+07            | 1.88.E+07            | 1.85.E+07            |
| 1821 | O00273-1  | DNA fragmentation factor subunit alpha [OS=Homo sapiens]                                      | 13.767        | 4.22.E+07         | 3.09.E+07         | 3.54.E+07         | 3.39.E+07         | 4.16.E+07            | 3.17.E+07            | 3.22.E+07            | 3.16.E+07            | 3.62.E+07            | 3.89.E+07            | 3.51.E+07            | 3.68.E+07            |
| 1822 | Q99653    | Calcineurin B homologous protein 1 [OS=Homo sapiens]                                          | 13.746        | 1.11.E+07         | 1.21.E+07         | 3.25.E+07         | 1.24.E+07         | 2.64.E+07            | 2.48.E+07            | 2.53.E+07            | 2.51.E+07            | 3.45.E+07            | 3.56.E+07            | 3.11.E+07            | 2.20.E+07            |
| 1823 | O00165    | HCLS1-associated protein X-1 [OS=Homo sapiens]                                                | 13.713        | 4.74.E+07         | 4.28.E+07         | 3.85.E+07         | 3.71.E+07         | 3.26.E+07            | 3.54.E+07            | 3.91.E+07            | 3.85.E+07            | 3.60.E+07            | 2.86.E+07            | 3.82.E+07            | 3.56.E+07            |
| 1824 | P49406    | 39S ribosomal protein L19, mitochondrial [OS=Homo sapiens]                                    | 13.685        | 9.89.E+07         | 9.29.E+07         | 8.95.E+07         | 1.06.E+08         | 1.05.E+08            | 8.03.E+07            | 1.02.E+08            | 9.93.E+07            | 9.31.E+07            | 1.09.E+08            | 9.39.E+07            | 8.46.E+07            |
| 1825 | Q9H267    | Vacuolar protein sorting-associated protein 33B [OS=Homo sapiens]                             | 13.68         | 5.26.E+07         | 4.58.E+07         | 2.71.E+07         | 5.56.E+07         | 5.88.E+07            | 6.71.E+07            | 6.15.E+07            | 5.56.E+07            | 6.26.E+07            | 5.14.E+07            | 5.17.E+07            | 6.48.E+07            |
| 1826 | Q13242    | serine/arginine-rich splicing factor 9 [OS=Homo sapiens]                                      | 13.68         | 1.12.E+08         | 7.17.E+07         | 1.12.E+08         | 1.05.E+08         | 1.05.E+08            | 1.02.E+08            | 1.02.E+08            | 1.13.E+08            | 1.19.E+08            | 1.14.E+08            | 7.20.E+07            | 1.12.E+08            |
| 1827 | Q8NCA5    | protein FAM98A [OS=Homo sapiens]                                                              | 13.647        | 2.02.E+07         | 2.28.E+07         | 2.21.E+07         | 2.17.E+07         | 2.18.E+07            | 2.01.E+07            | 2.26.E+07            | 2.17.E+07            | 2.35.E+07            | 2.28.E+07            | 1.96.E+07            | 2.45.E+07            |
| 1828 | Q16740    | ATP-dependent Clp protease proteolytic subunit, mitochondrial [OS=Homo sapiens]               | 13.605        | 1.38.E+08         | 2.48.E+07         | 2.46.E+07         | 1.67.E+07         | 1.68.E+07            | 1.70.E+07            | 1.66.E+07            | 1.71.E+07            | 1.89.E+07            | 2.13.E+07            | 1.76.E+07            | 1.85.E+07            |
| 1829 | Q9UBW8    | COP9 signalosome complex subunit 7a [OS=Homo sapiens]                                         | 13.602        | 4.84.E+07         | 5.30.E+07         | 5.61.E+07         | 5.11.E+07         | 4.01.E+07            | 4.88.E+07            | 4.61.E+07            | 5.21.E+07            | 4.42.E+07            | 4.99.E+07            | 3.39.E+07            | 5.07.E+07            |
| 1830 | Q9NY93    | Probable ATP-dependent RNA helicase DDX56 [OS=Homo sapiens]                                   | 13.58         | 2.57.E+07         | 2.56.E+07         | 2.39.E+07         | 2.55.E+07         | 2.35.E+07            | 2.26.E+07            | 2.10.E+07            | 2.07.E+07            | 2.42.E+07            | 2.17.E+07            | 2.22.E+07            | 2.55.E+07            |
| 1831 | P17612    | cAMP-dependent protein kinase catalytic subunit alpha [OS=Homo sapiens]                       | 13.571        | 6.73.E+07         | 6.30.E+07         | 6.23.E+07         | 6.33.E+07         | 8.61.E+07            | 9.10.E+07            | 7.52.E+07            | 7.55.E+07            | 7.94.E+07            | 7.78.E+07            | 7.45.E+07            | 7.06.E+07            |
| 1832 | P40938    | replication factor C subunit 3 [OS=Homo sapiens]                                              | 13.564        | 1.77.E+07         | 1.92.E+07         | 2.01.E+07         | 1.93.E+07         | 1.98.E+07            | 1.80.E+07            | 2.06.E+07            | 1.85.E+07            | 2.02.E+07            | 1.79.E+07            | 1.59.E+07            | 1.84.E+07            |
| 1833 | Q9BTV4    | Transmembrane protein 43 [OS=Homo sapiens]                                                    | 13.555        | 4.25.E+07         | 4.04.E+07         | 3.22.E+07         | 4.47.E+07         | 5.33.E+07            | 5.20.E+07            | 3.93.E+07            | 5.45.E+07            | 5.15.E+07            | 5.59.E+07            | 3.90.E+07            | 6.24.E+07            |
| 1834 | Q9UK45    | U6 snRNA-associated Sm-like protein LSM7 [OS=Homo sapiens]                                    | 13.554        | 6.23.E+07         | 5.67.E+07         | 6.76.E+07         | 5.16.E+07         | 6.55.E+07            | 6.70.E+07            | 7.28.E+07            | 5.55.E+07            | 5.74.E+07            | 7.24.E+07            | 5.52.E+07            | 5.56.E+07            |
| 1835 | Q9BVJ6-1  | U3 small nucleolar RNA-associated protein 14 homolog A [OS=Homo sapiens]                      | 13.543        | 3.27.E+07         | 5.78.E+07         | 2.63.E+07         | 6.72.E+07         | 2.40.E+07            | 2.41.E+07            | 2.18.E+07            | 1.56.E+07            | 1.89.E+07            | 2.02.E+07            | 1.76.E+07            | 1.57.E+07            |
| 1836 | P36405    | ADP-ribosylation factor-like protein 3 [OS=Homo sapiens]                                      | 13.531        | 5.51.E+07         | 5.65.E+07         | 5.77.E+07         | 6.16.E+07         | 5.14.E+07            | 4.98.E+07            | 5.32.E+07            | 5.27.E+07            | 5.79.E+07            | 5.80.E+07            | 5.55.E+07            | 5.93.E+07            |
| 1837 | Q8IXM3    | 39S ribosomal protein L41, mitochondrial [OS=Homo sapiens]                                    | 13.527        | 2.06.E+07         | 1.39.E+07         | 1.43.E+07         | 1.71.E+07         | 1.87.E+07            | 1.63.E+07            | 1.72.E+07            | 1.44.E+07            | 1.58.E+07            | 1.31.E+07            | 1.33.E+07            | 1.55.E+07            |
| 1838 | P49458    | Signal recognition particle 9 kDa protein [OS=Homo sapiens]                                   | 13.511        | 2.69.E+08         | 2.55.E+08         | 2.68.E+08         | 2.35.E+08         | 2.26.E+08            | 2.32.E+08            | 2.25.E+08            | 2.32.E+08            | 2.56.E+08            | 2.45.E+08            | 2.43.E+08            | 2.44.E+08            |
| 1839 | O00154    | cytosolic acyl coenzyme A thioester hydrolase [OS=Homo sapiens]                               | 13.454        | 1.34.E+08         | 1.17.E+08         | 4.58.E+07         | 6.32.E+07         | 1.28.E+08            | 8.58.E+07            | 3.97.E+07            | 4.98.E+07            | 8.20.E+07            | 6.20.E+07            | 4.66.E+07            | 8.39.E+07            |
| 1840 | Q16787-2  | Laminin subunit alpha-3 [OS=Homo sapiens]                                                     | 13.454        | 1.76.E+07         | 1.01.E+07         | 1.78.E+07         | 1.65.E+07         | 1.11.E+07            | 2.19.E+07            | 2.35.E+07            | 2.55.E+07            | 2.28.E+07            | 2.68.E+07            | 2.77.E+07            | 2.37.E+07            |
| 1841 | Q9NR12-1  | PDZ and LIM domain protein 7 [OS=Homo sapiens]                                                | 13.452        | 3.21.E+07         | 2.77.E+07         | 2.69.E+07         | 2.33.E+07         | 7.86.E+07            | 7.18.E+07            | 6.51.E+07            | 6.65.E+07            | 4.34.E+07            | 5.97.E+07            | 4.44.E+07            | 5.55.E+07            |
| 1842 | Q8N183    | Mimitin, mitochondrial [OS=Homo sapiens]                                                      | 13.402        | 2.00.E+07         | 2.32.E+07         | 2.34.E+07         | 2.17.E+07         | 2.34.E+07            | 2.05.E+07            | 2.22.E+07            | 2.08.E+07            | 2.59.E+07            | 2.56.E+07            | 2.58.E+07            | 2.32.E+07            |
| 1843 | P48960-1  | CD97 antigen [OS=Homo sapiens]                                                                | 13.375        | 3.21.E+07         | 2.54.E+07         | 2.45.E+07         | 2.88.E+07         | 3.39.E+07            | 3.41.E+07            | 2.01.E+07            | 3.40.E+07            | 3.51.E+07            | 3.26.E+07            | 3.39.E+07            | 3.46.E+07            |
| 1844 | O14548    | Cytochrome c oxidase subunit 7A-related protein, mitochondrial [OS=Homo sapiens]              | 13.365        | 3.84.E+07         | 3.43.E+07         | 3.43.E+07         | 3.67.E+07         | 2.72.E+07            | 3.41.E+07            | 3.36.E+07            | 2.94.E+07            | 2.05.E+07            | 2.97.E+07            | 2.87.E+07            | 2.94.E+07            |
| 1845 | Q92882    | osteoclast-stimulating factor 1 [OS=Homo sapiens]                                             | 13.355        | 5.15.E+07         | 3.82.E+07         | 2.35.E+07         | 4.32.E+07         | 4.89.E+07            | 4.66.E+07            | 4.98.E+07            | 5.21.E+07            | 4.31.E+07            | 2.27.E+07            | 1.81.E+07            | 4.01.E+07            |
| 1846 | Q9H299    | SH3 domain-binding glutamic acid-rich-like protein 3 [OS=Homo sapiens]                        | 13.352        | 7.01.E+07         | 6.63.E+07         | 7.28.E+07         | 6.61.E+07         | 1.13.E+08            | 1.00.E+08            | 9.13.E+07            | 9.46.E+07            | 9.97.E+07            | 8.77.E+07            | 1.03.E+08            | 9.26.E+07            |
| 1847 | O00267    | Transcription elongation factor Spt5 [OS=Homo sapiens]                                        | 13.334        | 1.34.E+07         | 1.36.E+07         | 1.52.E+07         | 1.87.E+07         | 1.44.E+07            | 1.45.E+07            | 1.95.E+07            | 1.62.E+07            | 2.17.E+07            | 1.91.E+07            | 2.38.E+07            | 1.86.E+07            |
| 1848 | P56377    | AP-1 complex subunit sigma-2 [OS=Homo sapiens]                                                | 13.316        |                   |                   |                   |                   |                      |                      |                      |                      |                      |                      |                      |                      |
| 1849 | Q6NUK1    | Calcium-binding mitochondrial carrier protein SCaMC-1 [OS=Homo sapiens]                       | 13.253        | 4.15.E+07         | 4.25.E+07         | 4.47.E+07         | 4.23.E+07         | 5.29.E+07            | 5.44.E+07            | 5.33.E+07            | 4.96.E+07            | 5.46.E+07            | 6.11.E+07            | 5.97.E+07            | 7.28.E+07            |
| 1850 | Q75844    | caax prenyl protease 1 homolog [OS=Homo sapiens]                                              | 13.249        | 3.21.E+07         | 2.64.E+07         | 2.45.E+07         | 2.18.E+07         | 2.72.E+07            | 2.58.E+07            | 2.41.E+07            | 2.81.E+07            | 3.55.E+07            | 3.11.E+07            | 3.30.E+07            | 2.84.E+07            |

| No.  | Accession | Description                                                                                  | Sum PEP Score | CTRL Abundances_1 | CTRL Abundances_2 | CTRL Abundances_3 | CTRL Abundances_4 | CLDN6-1 Abundances_1 | CLDN6-1 Abundances_2 | CLDN6-1 Abundances_3 | CLDN6-1 Abundances_4 | CLDN6-2 Abundances_1 | CLDN6-2 Abundances_2 | CLDN6-2 Abundances_3 | CLDN6-2 Abundances_4 |
|------|-----------|----------------------------------------------------------------------------------------------|---------------|-------------------|-------------------|-------------------|-------------------|----------------------|----------------------|----------------------|----------------------|----------------------|----------------------|----------------------|----------------------|
| 1851 | Q15067    | Peroxisomal acyl-coenzyme A oxidase 1 [OS=Homo sapiens]                                      | 13.245        | 2.74.E+07         | 2.07.E+07         | 2.66.E+07         | 2.71.E+07         | 1.81.E+07            | 1.96.E+07            | 1.98.E+07            | 2.71.E+07            | 2.01.E+07            | 1.62.E+07            | 2.15.E+07            | 1.59.E+07            |
| 1852 | Q9H2G2-1  | STE20-like serine/threonine-protein kinase [OS=Homo sapiens]                                 | 13.206        | 3.42.E+07         | 2.81.E+07         | 6.06.E+07         | 5.46.E+07         | 3.07.E+07            | 2.50.E+07            | 4.68.E+07            | 6.72.E+07            | 2.93.E+07            | 8.97.E+07            | 8.22.E+07            | 5.82.E+07            |
| 1853 | Q92667    | A-kinase anchor protein 1, mitochondrial [OS=Homo sapiens]                                   | 13.196        | 2.72.E+05         |                   |                   | 6.61.E+05         | 7.04.E+05            | 1.14.E+06            | 4.29.E+05            | 3.07.E+05            | 2.60.E+05            | 3.35.E+05            |                      | 1.29.E+05            |
| 1854 | Q9H0W9    | Ester hydrolase C11orf54 [OS=Homo sapiens]                                                   | 13.177        | 8.05.E+07         | 8.30.E+07         | 8.27.E+07         | 8.70.E+07         | 5.73.E+07            | 6.41.E+07            | 5.95.E+07            | 5.81.E+07            | 9.70.E+07            | 9.70.E+07            | 9.61.E+07            | 1.04.E+08            |
| 1855 | Q9Y3A6-1  | Transmembrane emp24 domain-containing protein 5 [OS=Homo sapiens]                            | 13.13         | 9.25.E+06         |                   | 4.52.E+06         |                   | 7.44.E+06            | 7.07.E+06            | 4.43.E+06            | 6.44.E+06            | 6.50.E+06            | 5.65.E+06            | 6.39.E+06            | 5.26.E+06            |
| 1856 | Q9Y2W2    | VWV domain-binding protein 11 [OS=Homo sapiens]                                              | 13.113        | 3.41.E+07         | 3.50.E+07         | 3.51.E+07         | 3.62.E+07         | 3.27.E+07            | 3.33.E+07            | 3.10.E+07            | 3.20.E+07            | 3.28.E+07            | 3.55.E+07            | 3.67.E+07            | 3.52.E+07            |
| 1857 | Q96P48-6  | Arf-GAP with Rho-GAP domain, ANK repeat and PH domain-containing protein 1 [OS=Homo sapiens] | 13.105        |                   | 3.80.E+06         | 8.08.E+06         | 9.68.E+06         | 8.61.E+06            | 1.11.E+07            | 5.04.E+06            | 7.58.E+06            | 9.78.E+06            | 4.91.E+06            | 7.42.E+06            | 9.72.E+06            |
| 1858 | P42785-1  | lysosomal Pro-X carboxypeptidase [OS=Homo sapiens]                                           | 13.074        | 1.05.E+07         | 9.04.E+06         | 8.59.E+06         | 1.15.E+07         | 1.60.E+07            | 1.71.E+07            | 1.67.E+07            | 1.74.E+07            | 1.57.E+07            | 1.73.E+07            | 1.71.E+07            | 1.82.E+07            |
| 1859 | Q9UI10-1  | translation initiation factor eIF-2B subunit delta [OS=Homo sapiens]                         | 13.025        | 5.76.E+07         | 4.31.E+07         | 6.25.E+07         | 1.72.E+07         | 5.87.E+07            | 5.36.E+07            | 5.47.E+07            | 5.54.E+07            | 4.82.E+07            | 3.47.E+07            | 4.55.E+07            | 4.60.E+07            |
| 1860 | P48059    | LIM and senescent cell antigen-like-containing domain protein 1 [OS=Homo sapiens]            | 13.021        | 4.18.E+06         | 6.02.E+06         | 5.45.E+06         | 6.52.E+06         | 5.76.E+06            | 7.23.E+06            | 6.48.E+06            | 5.80.E+06            | 5.85.E+06            | 7.00.E+06            | 7.03.E+06            | 5.57.E+06            |
| 1861 | Q96S52    | GPI transamidase component PIG-S [OS=Homo sapiens]                                           | 13.014        | 1.02.E+07         | 7.28.E+06         | 8.37.E+06         | 8.57.E+06         | 7.90.E+06            | 9.36.E+06            | 8.64.E+06            | 9.46.E+06            | 5.47.E+06            | 5.98.E+06            | 7.06.E+06            | 7.05.E+06            |
| 1862 | Q8N3R9-1  | MAGUK p55 subfamily member 5 [OS=Homo sapiens]                                               | 12.99         | 1.50.E+07         | 1.46.E+07         | 1.62.E+07         | 1.46.E+07         | 1.74.E+07            | 1.70.E+07            | 1.85.E+07            | 1.73.E+07            | 1.86.E+07            | 1.76.E+07            | 1.74.E+07            | 1.51.E+07            |
| 1863 | Q13131    | 5'-AMP-activated protein kinase catalytic subunit alpha-1 [OS=Homo sapiens]                  | 12.985        | 1.10.E+07         | 8.27.E+06         | 7.60.E+06         | 1.21.E+07         | 1.19.E+07            | 9.02.E+06            | 1.03.E+07            | 1.00.E+07            | 1.04.E+07            | 1.53.E+07            | 1.34.E+07            | 1.32.E+07            |
| 1864 | Q8TBC4-1  | NEDD8-activating enzyme E1 catalytic subunit [OS=Homo sapiens]                               | 12.979        | 2.68.E+07         | 4.88.E+07         | 4.89.E+07         | 6.41.E+07         | 3.96.E+07            | 3.26.E+07            | 5.87.E+07            | 2.86.E+07            | 6.55.E+07            | 4.85.E+07            | 5.55.E+07            | 4.99.E+07            |
| 1865 | O60573    | eukaryotic translation initiation factor 4E type 2 [OS=Homo sapiens]                         | 12.965        | 2.22.E+07         | 1.88.E+07         | 2.08.E+07         | 2.05.E+07         | 2.02.E+07            | 2.16.E+07            | 2.00.E+07            | 1.95.E+07            | 2.05.E+07            | 1.84.E+07            | 2.07.E+07            | 1.84.E+07            |
| 1866 | P50148    | Guanine nucleotide-binding protein G(Q) subunit alpha [OS=Homo sapiens]                      | 12.963        |                   | 4.88.E+06         | 6.49.E+06         | 7.15.E+06         | 5.24.E+06            | 6.19.E+06            | 5.63.E+06            | 5.61.E+06            | 3.09.E+06            | 3.50.E+06            | 3.85.E+06            | 2.16.E+06            |
| 1867 | Q9Y676    | 28S ribosomal protein S18b, mitochondrial [OS=Homo sapiens]                                  | 12.952        | 1.26.E+07         | 1.02.E+07         | 8.56.E+06         | 1.11.E+07         | 1.16.E+07            | 1.12.E+07            | 1.16.E+07            | 7.68.E+06            | 1.25.E+07            | 8.59.E+06            | 8.45.E+06            | 9.06.E+06            |
| 1868 | Q9UNL2    | Translocon-associated protein subunit gamma [OS=Homo sapiens]                                | 12.947        | 6.54.E+07         | 8.73.E+07         | 8.27.E+07         | 8.06.E+07         | 6.14.E+07            | 7.17.E+07            | 7.15.E+07            | 6.37.E+07            | 6.99.E+07            | 7.74.E+07            | 7.71.E+07            | 8.42.E+07            |
| 1869 | O00244    | Copper transport protein ATOX1 [OS=Homo sapiens]                                             | 12.938        | 3.06.E+07         | 3.07.E+07         | 4.26.E+07         | 3.52.E+07         | 2.54.E+07            | 2.88.E+07            | 2.70.E+07            | 2.78.E+07            | 2.33.E+07            | 3.30.E+07            | 3.15.E+07            | 3.25.E+07            |
| 1870 | Q14CX7-1  | N-alpha-acetyltransferase 25, NatB auxiliary subunit [OS=Homo sapiens]                       | 12.932        | 1.52.E+07         | 1.29.E+07         | 1.44.E+07         | 1.61.E+07         | 6.97.E+06            | 8.51.E+06            | 1.01.E+07            | 7.55.E+06            | 1.24.E+07            | 1.30.E+07            | 1.19.E+07            | 1.35.E+07            |
| 1871 | Q13330-1  | Metastasis-associated protein MTA1 [OS=Homo sapiens]                                         | 12.929        | 2.66.E+07         | 2.80.E+07         | 2.08.E+07         | 4.40.E+06         |                      | 3.54.E+06            |                      | 2.08.E+06            | 2.21.E+07            | 2.25.E+07            | 1.92.E+07            | 5.96.E+06            |
| 1872 | Q9H0E2    | Toll-interacting protein [OS=Homo sapiens]                                                   | 12.889        | 6.10.E+07         | 5.07.E+07         | 4.93.E+07         | 1.72.E+07         | 4.11.E+07            | 3.95.E+07            | 4.74.E+07            | 3.99.E+07            | 3.54.E+07            | 1.68.E+07            | 3.98.E+07            | 3.86.E+07            |
| 1873 | Q9H1C4    | Protein unc-93 homolog B1 [OS=Homo sapiens]                                                  | 12.88         | 1.71.E+07         | 1.38.E+07         | 1.51.E+07         | 1.54.E+07         | 1.38.E+07            | 1.42.E+07            | 1.35.E+07            | 1.10.E+07            | 1.31.E+07            | 1.28.E+07            | 1.23.E+07            | 1.14.E+07            |
| 1874 | Q96DX5    | Ankyrin repeat and SOCS box protein 9 [OS=Homo sapiens]                                      | 12.877        | 7.73.E+06         | 8.01.E+06         | 5.46.E+06         | 8.65.E+06         | 1.44.E+07            | 1.52.E+07            | 1.68.E+07            | 1.38.E+07            | 6.92.E+06            | 1.10.E+07            | 9.02.E+06            | 9.54.E+06            |
| 1875 | Q15003    | Condensin complex subunit 2 [OS=Homo sapiens]                                                | 12.876        | 1.43.E+07         | 2.74.E+06         | 7.15.E+06         |                   | 1.15.E+07            | 4.73.E+06            | 4.97.E+06            | 8.76.E+06            | 4.81.E+06            | 8.75.E+06            | 9.90.E+06            | 8.71.E+06            |
| 1876 | Q9H9J2    | 39S ribosomal protein L44, mitochondrial [OS=Homo sapiens]                                   | 12.849        | 2.27.E+07         | 2.07.E+07         | 1.11.E+07         | 1.93.E+07         | 2.02.E+07            | 1.84.E+07            | 1.77.E+07            | 1.11.E+07            | 1.91.E+07            | 1.11.E+07            | 1.55.E+07            | 1.00.E+07            |
| 1877 | P22307-1  | Non-specific lipid-transfer protein [OS=Homo sapiens]                                        | 12.846        | 1.48.E+08         | 1.48.E+08         | 1.42.E+08         | 1.39.E+08         | 1.43.E+08            | 1.35.E+08            | 1.43.E+08            | 1.48.E+08            | 1.53.E+08            | 1.45.E+08            | 1.37.E+08            | 1.38.E+08            |
| 1878 | P51153    | Ras-related protein Rab-13 [OS=Homo sapiens]                                                 | 12.838        | 3.47.E+07         | 3.76.E+07         | 3.57.E+07         | 2.74.E+07         | 4.52.E+07            | 4.34.E+07            | 3.47.E+07            | 3.75.E+07            | 6.79.E+07            | 7.07.E+07            | 4.49.E+07            | 4.01.E+07            |
| 1879 | O15446-1  | DNA-directed RNA polymerase I subunit RPA34 [OS=Homo sapiens]                                | 12.807        | 1.44.E+07         | 1.77.E+07         | 3.33.E+07         | 1.36.E+07         | 1.37.E+07            | 1.22.E+07            |                      | 1.40.E+07            |                      | 3.43.E+07            | 3.25.E+07            | 2.78.E+07            |
| 1880 | Q9BV86-1  | N-terminal Xaa-Pro-Lys N-methyltransferase 1 [OS=Homo sapiens]                               | 12.792        | 2.19.E+07         | 2.31.E+07         | 2.40.E+07         | 2.42.E+07         | 2.05.E+07            | 2.47.E+07            | 2.62.E+07            | 1.89.E+07            | 2.39.E+07            | 2.56.E+07            | 2.61.E+07            | 2.85.E+07            |
| 1881 | Q12907    | Vesicular integral-membrane protein VIP36 [OS=Homo sapiens]                                  | 12.791        | 5.34.E+07         | 4.40.E+07         | 4.59.E+07         | 4.44.E+07         | 5.75.E+07            | 5.04.E+07            | 4.98.E+07            | 5.72.E+07            | 1.28.E+07            | 3.04.E+07            | 2.47.E+07            | 3.29.E+07            |
| 1882 | O14662-1  | Syntaxin-16 [OS=Homo sapiens]                                                                | 12.788        | 2.92.E+05         | 5.84.E+05         | 2.39.E+05         |                   | 1.24.E+06            | 5.30.E+05            |                      | 1.63.E+05            | 7.14.E+05            | 3.75.E+05            | 1.51.E+05            |                      |
| 1883 | Q7Z5K2-1  | Wings apart-like protein homolog [OS=Homo sapiens]                                           | 12.762        | 1.05.E+07         | 6.35.E+06         | 6.55.E+06         | 6.89.E+06         | 6.70.E+06            | 6.63.E+06            | 6.86.E+06            | 6.91.E+06            | 6.33.E+06            | 7.20.E+06            | 6.94.E+06            | 6.01.E+06            |
| 1884 | Q6P587-1  | Acylpyruvase FAHD1, mitochondrial [OS=Homo sapiens]                                          | 12.758        | 1.30.E+07         | 1.33.E+07         | 1.26.E+07         | 1.48.E+07         | 1.27.E+07            | 1.15.E+07            | 1.23.E+07            | 1.13.E+07            | 1.80.E+07            | 1.60.E+07            | 1.80.E+07            | 1.91.E+07            |
| 1885 | Q8NEJ9    | neuroguin [OS=Homo sapiens]                                                                  | 12.757        | 8.56.E+06         | 6.63.E+06         | 7.79.E+06         | 9.36.E+06         | 6.49.E+06            | 7.37.E+06            | 7.82.E+06            | 8.09.E+06            | 5.20.E+06            | 5.76.E+06            | 6.03.E+06            | 6.22.E+06            |
| 1886 | Q9NP66    | High mobility group protein 20A [OS=Homo sapiens]                                            | 12.736        | 1.42.E+07         | 9.72.E+06         | 1.24.E+07         | 7.40.E+06         | 1.20.E+07            | 1.12.E+07            | 1.32.E+07            | 1.13.E+07            | 1.01.E+07            | 9.87.E+06            | 1.03.E+07            | 1.05.E+07            |
| 1887 | P61966    | AP-1 complex subunit sigma-1A [OS=Homo sapiens]                                              | 12.727        |                   |                   |                   |                   |                      |                      |                      |                      |                      |                      |                      |                      |
| 1888 | Q99757    | Thioredoxin, mitochondrial [OS=Homo sapiens]                                                 | 12.722        | 4.68.E+07         | 4.99.E+07         | 5.22.E+07         | 4.40.E+07         | 4.70.E+07            | 5.01.E+07            | 5.35.E+07            | 4.06.E+07            | 5.45.E+07            | 5.40.E+07            | 5.53.E+07            | 4.62.E+07            |
| 1889 | Q13136    | Liprin-alpha-1 [OS=Homo sapiens]                                                             | 12.707        | 6.77.E+07         | 7.03.E+07         | 6.62.E+07         | 6.99.E+07         | 6.90.E+07            | 6.87.E+07            | 6.66.E+07            | 7.09.E+07            | 5.92.E+07            | 5.82.E+07            | 5.90.E+07            | 6.46.E+07            |
| 1890 | Q7Z7E8-1  | Ubiquitin-conjugating enzyme E2 Q1 [OS=Homo sapiens]                                         | 12.692        | 2.51.E+07         | 4.95.E+06         | 2.20.E+07         | 6.61.E+06         |                      | 5.07.E+06            | 2.04.E+07            | 1.79.E+07            | 2.08.E+07            | 4.97.E+06            | 4.39.E+06            | 2.08.E+07            |
| 1891 | O75431    | Metaxin-2 [OS=Homo sapiens]                                                                  | 12.684        | 3.87.E+07         | 2.96.E+07         | 3.88.E+07         | 3.23.E+07         | 3.39.E+07            | 3.56.E+07            | 3.61.E+07            | 2.89.E+07            | 2.72.E+07            | 3.13.E+07            | 1.50.E+07            | 2.83.E+07            |
| 1892 | O95466    | formin-like protein 1 [OS=Homo sapiens]                                                      | 12.678        | 1.59.E+07         | 1.18.E+07         | 1.18.E+07         | 1.09.E+07         | 1.29.E+07            | 1.12.E+07            | 1.34.E+07            | 1.08.E+07            | 1.78.E+07            | 1.04.E+07            | 1.21.E+07            | 1.56.E+07            |
| 1893 | O60306    | Intron-binding protein aquarius [OS=Homo sapiens]                                            | 12.642        | 1.06.E+07         | 8.23.E+06         | 8.46.E+06         | 7.31.E+06         | 8.34.E+06            | 7.28.E+06            | 7.80.E+06            | 8.02.E+06            | 7.35.E+06            | 9.10.E+06            | 5.80.E+06            | 6.94.E+06            |
| 1894 | Q96GQ7    | Probable ATP-dependent RNA helicase DDX27 [OS=Homo sapiens]                                  | 12.626        | 5.37.E+07         | 5.94.E+07         | 6.34.E+07         | 6.68.E+07         | 5.00.E+07            | 3.19.E+07            | 5.05.E+07            | 5.32.E+07            | 5.18.E+07            | 5.32.E+07            | 6.08.E+07            | 5.08.E+07            |
| 1895 | Q9BRJ2    | 39S ribosomal protein L45, mitochondrial [OS=Homo sapiens]                                   | 12.614        | 5.14.E+07         | 4.96.E+07         | 3.21.E+07         | 3.83.E+07         | 7.52.E+07            | 4.92.E+07            | 4.77.E+07            | 4.43.E+07            | 4.83.E+07            | 6.12.E+07            | 7.53.E+07            | 8.25.E+07            |
| 1896 | Q96S44    | TP53-regulating kinase [OS=Homo sapiens]                                                     | 12.612        | 7.36.E+06         | 1.02.E+07         | 9.07.E+06         | 6.42.E+06         | 6.26.E+06            | 7.14.E+06            | 7.60.E+06            | 5.46.E+06            | 1.09.E+07            | 8.66.E+06            | 9.32.E+06            | 9.10.E+06            |
| 1897 | P62891    | 60S ribosomal protein L39 [OS=Homo sapiens]                                                  | 12.582        | 6.25.E+08         | 6.43.E+08         | 5.82.E+08         | 5.15.E+08         | 5.69.E+08            | 5.10.E+08            | 4.95.E+08            | 5.26.E+08            | 5.67.E+08            | 5.40.E+08            | 5.38.E+08            | 5.18.E+08            |
| 1898 | Q9Y241    | HIG1 domain family member 1A, mitochondrial OS=Homo sapiens OX=9606 GN=HIGD1A PE=1 SV=1      | 12.544        | 1.30.E+07         | 1.34.E+07         | 1.34.E+07         | 1.71.E+07         | 1.12.E+07            | 1.24.E+07            | 1.57.E+07            | 1.41.E+07            | 1.49.E+07            | 1.54.E+07            | 1.53.E+07            | 1.70.E+07            |
| 1899 | P46926    | glucosamine-6-phosphate isomerase 1 [OS=Homo sapiens]                                        | 12.491        | 1.16.E+09         | 1.28.E+09         | 1.46.E+09         | 1.48.E+09         | 1.75.E+09            | 1.96.E+09            | 1.96.E+09            | 2.16.E+09            | 1.63.E+09            | 2.05.E+09            | 2.08.E+09            | 2.15.E+09            |
| 1900 | Q9BXK5-1  | Bcl-2-like protein 13 [OS=Homo sapiens]                                                      | 12.487        | 2.40.E+07         | 6.89.E+06         | 1.54.E+07         | 7.46.E+06         | 1.47.E+07            | 7.28.E+06            | 1.23.E+07            | 1.43.E+07            | 2.49.E+07            | 1.40.E+07            |                      | 2.01.E+07            |
| 1901 | P53801    | pituitary tumor-transforming gene 1 protein-interacting protein [OS=Homo sapiens]            | 12.46         | 7.19.E+07         | 5.64.E+07         | 5.91.E+07         | 5.39.E+07         | 1.00.E+08            | 5.88.E+07            | 8.17.E+07            | 9.70.E+07            | 1.03.E+08            | 1.37.E+08            | 9.81.E+07            | 1.22.E+08            |
| 1902 | Q92600    | CCR4-NOT transcription complex subunit 9 [OS=Homo sapiens]                                   | 12.447        | 3.64.E+07         | 3.16.E+07         | 2.92.E+07         | 3.24.E+07         | 3.45.E+07            | 3.59.E+07            | 3.20.E+07            | 3.35.E+07            | 3.49.E+07            | 3.33.E+07            | 3.73.E+07            | 3.82.E+07            |
| 1903 | P82675    | 28S ribosomal protein S5, mitochondrial [OS=Homo sapiens]                                    | 12.436        | 1.06.E+07         | 1.07.E+07         | 1.10.E+07         | 1.03.E+07         | 9.86.E+06            | 8.89.E+06            | 1.06.E+07            | 9.45.E+06            | 1.05.E+07            | 1.02.E+07            | 1.20.E+07            | 1.09.E+07            |

| No.  | Accession | Description                                                                       | Sum PEP Score | CTRL Abundances_1 | CTRL Abundances_2 | CTRL Abundances_3 | CTRL Abundances_4 | CLDN6-1 Abundances_1 | CLDN6-1 Abundances_2 | CLDN6-1 Abundances_3 | CLDN6-1 Abundances_4 | CLDN6-2 Abundances_1 | CLDN6-2 Abundances_2 | CLDN6-2 Abundances_3 | CLDN6-2 Abundances_4 |
|------|-----------|-----------------------------------------------------------------------------------|---------------|-------------------|-------------------|-------------------|-------------------|----------------------|----------------------|----------------------|----------------------|----------------------|----------------------|----------------------|----------------------|
| 1904 | Q07812    | Apoptosis regulator BAX [OS=Homo sapiens]                                         | 12.4          | 4.28.E+07         | 5.03.E+07         | 5.94.E+07         | 4.49.E+07         | 6.91.E+07            | 6.27.E+07            | 7.19.E+07            | 6.74.E+07            | 5.01.E+07            | 5.98.E+07            | 5.28.E+07            | 6.26.E+07            |
| 1905 | O75934    | Pre-mRNA-splicing factor spf27 [OS=Homo sapiens]                                  | 12.388        | 1.67.E+07         | 1.62.E+07         | 1.82.E+07         | 2.43.E+07         | 6.35.E+05            | 1.71.E+07            | 2.91.E+07            | 3.56.E+07            | 2.77.E+06            | 2.44.E+07            | 2.34.E+07            | 2.21.E+07            |
| 1906 | P36954    | DNA-directed RNA polymerase II subunit RPB9 [OS=Homo sapiens]                     | 12.377        | 2.41.E+07         | 1.53.E+07         | 1.45.E+07         | 2.07.E+07         | 1.72.E+07            | 1.68.E+07            | 1.76.E+07            | 1.44.E+07            | 1.04.E+07            | 1.70.E+07            | 1.58.E+07            | 1.48.E+07            |
| 1907 | Q04206    | Transcription factor p65 [OS=Homo sapiens]                                        | 12.319        | 5.13.E+07         | 5.11.E+07         | 4.93.E+07         | 4.93.E+07         | 4.28.E+07            | 4.42.E+07            | 5.06.E+07            | 4.83.E+07            | 5.97.E+07            | 5.05.E+07            | 5.26.E+07            | 5.21.E+07            |
| 1908 | P57088    | Transmembrane protein 33 [OS=Homo sapiens]                                        | 12.278        | 1.31.E+08         | 1.28.E+08         | 1.34.E+08         | 1.30.E+08         | 1.17.E+08            | 1.23.E+08            | 1.22.E+08            | 1.25.E+08            | 1.27.E+08            | 1.28.E+08            | 1.33.E+08            | 1.40.E+08            |
| 1909 | Q9H3S7    | Tyrosine-protein phosphatase non-receptor type 23 [OS=Homo sapiens]               | 12.264        | 9.39.E+06         | 9.37.E+06         |                   | 6.79.E+06         | 8.86.E+06            | 8.39.E+06            | 1.05.E+07            | 8.11.E+06            | 1.04.E+07            | 8.49.E+06            | 8.69.E+06            | 1.20.E+07            |
| 1910 | Q8TCD5    | 5(3')-deoxyribonucleotidase, cytosolic type [OS=Homo sapiens]                     | 12.263        | 4.15.E+07         | 4.35.E+07         | 4.30.E+07         | 4.09.E+07         | 4.60.E+07            | 4.06.E+07            | 5.07.E+07            | 4.94.E+07            | 3.19.E+07            | 2.82.E+07            | 3.07.E+07            | 2.28.E+06            |
| 1911 | Q12996-1  | Cleavage stimulation factor subunit 3 [OS=Homo sapiens]                           | 12.262        | 1.19.E+07         | 9.22.E+06         | 9.18.E+06         | 6.88.E+06         | 9.66.E+06            | 9.55.E+06            | 8.22.E+06            | 9.64.E+06            | 9.98.E+06            | 1.07.E+07            | 1.14.E+07            | 1.22.E+07            |
| 1912 | Q13428-1  | Treacle protein [OS=Homo sapiens]                                                 | 12.219        | 2.38.E+07         | 1.20.E+07         | 2.63.E+07         | 2.42.E+07         | 1.62.E+07            | 3.93.E+07            | 3.24.E+07            | 3.42.E+07            | 1.26.E+07            | 1.51.E+07            | 3.68.E+07            | 3.74.E+07            |
| 1913 | Q6ZJN1-1  | Neurobeachin-like protein 2 [OS=Homo sapiens]                                     | 12.199        | 4.53.E+06         | 9.48.E+04         |                   |                   | 9.78.E+04            |                      |                      |                      |                      |                      | 1.43.E+05            |                      |
| 1914 | Q9P2R7    | Succinate--CoA ligase [ADP-forming] subunit beta, mitochondrial [OS=Homo sapiens] | 12.165        | 3.24.E+07         | 3.56.E+07         | 3.78.E+07         | 3.35.E+07         | 5.36.E+07            | 5.36.E+07            | 3.48.E+07            | 5.75.E+07            | 6.14.E+07            | 5.62.E+07            | 4.12.E+07            | 6.12.E+07            |
| 1915 | Q99584    | Protein S100-A13 [OS=Homo sapiens]                                                | 12.161        | 1.76.E+07         | 3.94.E+07         | 1.95.E+07         | 2.40.E+07         | 3.42.E+07            | 3.21.E+07            | 2.13.E+07            | 4.02.E+07            | 4.60.E+07            | 4.89.E+07            | 4.87.E+07            | 4.68.E+07            |
| 1916 | Q9Y221-1  | 60S ribosome subunit biogenesis protein NIP7 homolog [OS=Homo sapiens]            | 12.159        | 5.86.E+07         | 6.34.E+07         | 4.92.E+07         | 5.47.E+07         | 4.88.E+07            | 5.75.E+07            | 5.22.E+07            | 5.43.E+07            | 6.46.E+07            | 5.35.E+07            | 5.65.E+07            | 5.41.E+07            |
| 1917 | Q8NEW0    | Zinc transporter 7 [OS=Homo sapiens]                                              | 12.153        | 1.60.E+07         | 2.42.E+07         | 2.26.E+07         | 1.84.E+07         | 2.51.E+07            | 2.68.E+07            | 2.63.E+07            | 2.42.E+07            | 2.45.E+07            | 2.18.E+07            | 1.85.E+07            | 2.26.E+07            |
| 1918 | Q9NW13-1  | RNA-binding protein 28 [OS=Homo sapiens]                                          | 12.092        | 1.12.E+07         | 1.50.E+06         | 2.28.E+06         | 4.30.E+06         | 9.32.E+06            | 8.35.E+06            | 5.74.E+06            | 5.22.E+06            | 1.43.E+06            | 7.40.E+06            | 5.05.E+06            | 2.71.E+06            |
| 1919 | Q8WUX9    | Charged multivesicular body protein 7 [OS=Homo sapiens]                           | 12.085        | 1.22.E+07         | 8.29.E+06         | 8.93.E+06         | 9.17.E+06         | 8.77.E+06            | 9.24.E+06            | 1.05.E+07            | 8.42.E+06            | 8.98.E+06            | 9.18.E+06            | 9.79.E+06            | 9.78.E+06            |
| 1920 | Q9Y6A9    | Signal peptidase complex subunit 1 [OS=Homo sapiens]                              | 12.081        | 3.01.E+07         |                   | 3.16.E+07         | 2.99.E+07         | 3.08.E+07            | 2.72.E+07            | 2.70.E+07            | 2.91.E+07            |                      | 3.26.E+07            | 3.55.E+07            | 3.09.E+07            |
| 1921 | Q9NRPO-1  | oligosaccharyltransferase complex subunit OSTC [OS=Homo sapiens]                  | 12.076        | 1.05.E+08         | 9.94.E+07         | 1.06.E+08         | 1.39.E+08         | 9.79.E+07            | 1.37.E+08            | 1.42.E+08            | 1.40.E+08            | 1.05.E+08            | 1.38.E+08            | 1.56.E+08            | 1.56.E+08            |
| 1922 | O14976    | Cyclin-G-associated kinase [OS=Homo sapiens]                                      | 12.073        | 7.39.E+06         | 5.40.E+06         | 5.48.E+06         | 5.66.E+06         | 4.98.E+06            | 4.98.E+06            | 4.83.E+06            | 4.86.E+06            | 4.55.E+06            | 4.77.E+06            | 5.43.E+06            | 5.22.E+06            |
| 1923 | Q9Y320    | Thioredoxin-related transmembrane protein 2 [OS=Homo sapiens]                     | 12.043        | 1.35.E+07         | 1.08.E+07         | 1.32.E+07         | 1.33.E+07         | 1.70.E+07            | 1.80.E+07            | 1.97.E+07            | 2.02.E+07            | 8.80.E+06            | 9.87.E+06            | 1.04.E+07            | 1.06.E+07            |
| 1924 | Q14151    | scaffold attachment factor B2 [OS=Homo sapiens]                                   | 12.043        | 6.73.E+07         | 7.08.E+07         | 1.09.E+08         | 1.04.E+08         | 9.57.E+07            | 1.34.E+08            | 1.32.E+08            | 1.00.E+08            | 1.03.E+08            | 6.97.E+07            | 1.43.E+08            | 6.59.E+07            |
| 1925 | Q16540    | 39S ribosomal protein L23, mitochondrial [OS=Homo sapiens]                        | 12.039        | 3.83.E+07         | 3.29.E+07         | 2.97.E+07         | 3.52.E+07         | 3.07.E+07            | 3.21.E+07            | 3.03.E+07            | 2.84.E+07            | 3.07.E+07            | 3.52.E+07            | 3.37.E+07            | 2.68.E+07            |
| 1926 | Q8WU90    | Zinc finger CCHC domain-containing protein 15 [OS=Homo sapiens]                   | 12.038        | 2.97.E+07         | 2.68.E+07         | 3.17.E+07         | 3.25.E+07         | 3.35.E+07            | 3.37.E+07            | 3.23.E+07            | 2.90.E+07            | 3.46.E+07            | 3.28.E+07            | 3.27.E+07            | 3.11.E+07            |
| 1927 | O00469-1  | procollagen-lysine,2-oxoglutarate 5-dioxygenase 2 [OS=Homo sapiens]               | 12.014        | 1.11.E+07         | 1.15.E+07         | 1.30.E+07         | 1.19.E+07         | 1.25.E+07            | 1.51.E+07            | 1.46.E+07            | 1.51.E+07            | 1.25.E+07            | 1.67.E+07            | 1.52.E+07            | 1.62.E+07            |
| 1928 | P10909-1  | Clusterin [OS=Homo sapiens]                                                       | 12.007        | 6.02.E+07         | 5.45.E+07         | 5.80.E+07         | 5.57.E+07         | 6.14.E+07            | 6.22.E+07            | 6.44.E+07            | 6.76.E+07            | 4.17.E+07            | 4.56.E+07            | 5.64.E+07            | 4.82.E+07            |
| 1929 | Q9NWW5    | ceroid-lipofuscinosis neuronal protein 6 [OS=Homo sapiens]                        | 11.995        | 3.95.E+07         | 4.52.E+07         | 3.84.E+07         | 3.98.E+07         | 4.58.E+07            | 4.21.E+07            | 5.94.E+07            | 5.27.E+07            | 4.05.E+07            | 4.01.E+07            | 3.98.E+07            | 3.81.E+07            |
| 1930 | Q9UNE7-1  | E3 ubiquitin-protein ligase CHIP [OS=Homo sapiens]                                | 11.992        | 3.41.E+07         | 3.02.E+07         | 3.52.E+07         | 3.65.E+07         | 2.61.E+07            | 1.15.E+07            | 7.63.E+06            | 8.20.E+06            | 6.90.E+06            | 2.35.E+07            | 2.60.E+07            | 2.70.E+07            |
| 1931 | O00194    | ras-related protein rab-27b [OS=Homo sapiens]                                     | 11.969        | 9.95.E+06         | 8.33.E+06         | 5.56.E+06         | 2.31.E+06         | 1.77.E+07            | 1.50.E+07            | 1.60.E+07            | 1.35.E+07            | 2.46.E+07            | 2.48.E+07            | 2.09.E+07            | 1.50.E+07            |
| 1932 | O14908-1  | PDZ domain-containing protein GIPC1 [OS=Homo sapiens]                             | 11.96         | 5.59.E+07         | 5.70.E+07         | 6.30.E+07         | 5.60.E+07         | 6.16.E+07            | 6.62.E+07            | 6.36.E+07            | 6.98.E+07            | 4.88.E+07            | 6.47.E+07            | 6.75.E+07            | 6.37.E+07            |
| 1933 | O60749    | Sorting nexin-2 [OS=Homo sapiens]                                                 | 11.948        | 1.90.E+07         | 2.01.E+07         | 1.47.E+07         | 1.68.E+07         | 1.30.E+07            | 1.08.E+07            | 1.43.E+07            | 1.38.E+07            | 2.47.E+07            | 2.31.E+07            | 2.05.E+07            | 2.19.E+07            |
| 1934 | O00461    | Golgi integral membrane protein 4 [OS=Homo sapiens]                               | 11.928        | 1.65.E+07         | 1.59.E+07         | 1.85.E+07         | 1.95.E+07         | 2.00.E+07            | 1.90.E+07            | 2.02.E+07            | 2.08.E+07            | 1.54.E+07            | 1.60.E+07            | 1.62.E+07            | 1.63.E+07            |
| 1935 | O75400    | pre-mRNA-processing factor 40 homolog A [OS=Homo sapiens]                         | 11.924        | 9.88.E+07         | 1.02.E+08         | 9.57.E+07         | 1.07.E+08         | 9.03.E+07            | 4.91.E+07            | 5.25.E+07            | 5.10.E+07            | 1.04.E+08            | 9.68.E+07            | 9.61.E+07            | 9.24.E+07            |
| 1936 | Q96CD2-1  | phosphopantothenoylcysteine decarboxylase [OS=Homo sapiens]                       | 11.91         | 9.51.E+06         | 6.86.E+06         | 8.07.E+06         | 9.55.E+06         | 7.77.E+06            | 8.32.E+06            | 6.81.E+06            | 6.04.E+06            | 8.27.E+06            | 8.98.E+06            | 7.46.E+06            | 6.83.E+06            |
| 1937 | Q9BRG1    | Vacuolar protein-sorting-associated protein 25 [OS=Homo sapiens]                  | 11.903        | 4.83.E+07         | 4.48.E+07         | 4.57.E+07         | 4.97.E+07         | 4.46.E+07            | 4.39.E+07            | 4.57.E+07            | 4.15.E+07            | 4.81.E+07            | 4.67.E+07            | 4.30.E+07            | 3.70.E+07            |
| 1938 | O60830-1  | Mitochondrial import inner membrane translocase subunit Tim17-B [OS=Homo sapiens] | 11.885        | 1.75.E+07         | 1.99.E+07         | 1.85.E+07         | 1.81.E+07         | 1.53.E+07            | 1.51.E+07            | 1.72.E+07            | 6.75.E+06            | 1.81.E+07            | 1.37.E+07            | 1.77.E+07            | 1.90.E+07            |
| 1939 | P10398-1  | serine/threonine-protein kinase A-Raf [OS=Homo sapiens]                           | 11.807        | 1.13.E+07         | 9.25.E+06         | 1.03.E+07         | 1.11.E+07         | 1.37.E+07            | 9.71.E+06            | 1.21.E+07            | 1.03.E+07            | 1.41.E+07            | 1.33.E+07            | 1.32.E+07            | 1.36.E+07            |
| 1940 | Q92485-1  | acid sphingomyelinase-like phosphodiesterase 3B [OS=Homo sapiens]                 | 11.792        | 4.24.E+07         | 5.77.E+07         | 2.88.E+07         | 6.28.E+07         | 2.95.E+07            | 3.71.E+07            | 4.91.E+07            | 1.88.E+07            | 3.45.E+07            | 5.27.E+07            | 5.71.E+07            | 5.81.E+07            |
| 1941 | Q14790-1  | Caspase-8 [OS=Homo sapiens]                                                       | 11.776        | 4.89.E+07         | 3.46.E+07         | 5.57.E+07         | 6.00.E+07         | 6.55.E+07            | 7.34.E+07            | 7.15.E+07            | 6.58.E+07            | 6.73.E+07            | 7.25.E+07            | 7.86.E+07            | 6.49.E+07            |
| 1942 | P82930    | 28S ribosomal protein S34, mitochondrial [OS=Homo sapiens]                        | 11.747        | 4.24.E+07         | 4.19.E+07         | 3.95.E+07         | 4.61.E+07         | 3.19.E+07            | 3.07.E+07            | 3.23.E+07            | 3.23.E+07            | 4.91.E+07            | 4.46.E+07            | 4.25.E+07            | 4.90.E+07            |
| 1943 | Q9BV44    | THUMP domain-containing protein 3 [OS=Homo sapiens]                               | 11.742        | 3.39.E+07         | 2.94.E+07         | 3.24.E+07         | 3.14.E+07         | 2.63.E+07            | 2.96.E+07            | 3.07.E+07            | 2.05.E+07            | 3.23.E+07            | 2.82.E+07            | 1.96.E+07            | 2.90.E+07            |
| 1944 | Q9NTM9    | Copper homeostasis protein cutC homolog [OS=Homo sapiens]                         | 11.713        | 4.85.E+07         | 3.65.E+07         | 3.69.E+07         | 3.56.E+07         | 2.89.E+07            | 2.59.E+07            | 2.52.E+07            | 2.62.E+07            | 3.51.E+07            | 3.74.E+07            | 3.98.E+07            | 3.91.E+07            |
| 1945 | Q96M27-1  | protein PRRC1 [OS=Homo sapiens]                                                   | 11.71         | 1.61.E+07         | 1.10.E+07         | 4.68.E+06         | 1.05.E+07         | 1.36.E+07            | 1.19.E+07            | 1.11.E+07            | 9.05.E+06            | 1.38.E+07            | 1.42.E+07            | 1.20.E+07            | 1.12.E+07            |
| 1946 | Q86X55    | Histone-arginine methyltransferase CARM1 [OS=Homo sapiens]                        | 11.673        | 2.81.E+07         | 1.22.E+07         | 1.54.E+07         | 3.07.E+07         | 3.10.E+07            | 2.55.E+07            | 2.43.E+07            | 1.19.E+07            | 1.72.E+07            | 2.19.E+07            | 2.17.E+07            | 1.19.E+07            |
| 1947 | Q9NX55-2  | Huntingtin-interacting protein K [OS=Homo sapiens]                                | 11.644        | 6.17.E+07         | 5.49.E+07         | 4.71.E+07         | 5.50.E+07         | 5.70.E+07            | 5.82.E+07            | 5.37.E+07            | 4.88.E+07            | 5.65.E+07            | 5.39.E+07            | 5.20.E+07            | 3.65.E+07            |
| 1948 | Q13586    | stromal interaction molecule 1 [OS=Homo sapiens]                                  | 11.609        | 9.57.E+06         | 1.04.E+07         | 1.07.E+07         | 1.32.E+07         | 1.16.E+07            | 1.17.E+07            | 1.20.E+07            | 1.26.E+07            | 8.50.E+06            | 8.27.E+06            | 7.84.E+06            | 8.49.E+06            |
| 1949 | Q16186    | Proteasomal ubiquitin receptor ADRM1 [OS=Homo sapiens]                            | 11.571        | 8.56.E+07         | 9.50.E+07         | 8.14.E+07         | 7.82.E+07         | 7.31.E+07            | 8.01.E+07            | 8.86.E+07            | 8.69.E+07            | 9.79.E+07            | 7.72.E+07            | 8.57.E+07            | 8.54.E+07            |
| 1950 | Q8WVX9    | Fatty acyl-CoA reductase 1 [OS=Homo sapiens]                                      | 11.561        | 1.74.E+07         | 2.20.E+07         | 3.20.E+07         | 3.09.E+07         | 3.67.E+07            | 3.44.E+07            | 3.71.E+07            | 3.84.E+07            | 1.68.E+07            | 1.65.E+07            | 2.95.E+07            | 1.57.E+07            |
| 1951 | Q72222    | Elongation factor-like GTPase 1 [OS=Homo sapiens]                                 | 11.548        | 3.94.E+07         | 2.94.E+07         | 2.85.E+07         | 2.91.E+07         | 3.59.E+07            | 3.17.E+07            | 3.38.E+07            | 2.53.E+07            | 4.29.E+07            | 2.83.E+07            | 4.13.E+07            | 3.57.E+07            |
| 1952 | Q14690    | Protein RRP5 homolog [OS=Homo sapiens]                                            | 11.54         | 4.14.E+07         | 7.06.E+07         | 4.60.E+07         | 6.93.E+07         | 5.26.E+07            | 3.19.E+07            | 4.90.E+07            | 4.04.E+07            | 4.68.E+07            | 2.64.E+07            | 4.62.E+07            | 7.21.E+07            |
| 1953 | Q10570    | Cleavage and polyadenylation specificity factor subunit 1 [OS=Homo sapiens]       | 11.532        | 5.90.E+06         | 7.04.E+06         | 7.17.E+06         | 6.39.E+06         | 4.27.E+06            | 4.01.E+06            | 6.03.E+06            | 5.83.E+06            | 7.59.E+06            | 8.14.E+06            | 6.32.E+06            | 5.63.E+06            |
| 1954 | Q9NZ23    | Charged multivesicular body protein 5 [OS=Homo sapiens]                           | 11.531        | 2.64.E+07         | 2.46.E+07         | 3.10.E+07         | 3.15.E+07         | 2.08.E+07            | 1.99.E+07            | 1.91.E+07            | 1.95.E+07            | 2.89.E+07            | 2.60.E+07            | 2.94.E+07            | 2.88.E+07            |
| 1955 | P57678    | Gem-associated protein 4 [OS=Homo sapiens]                                        | 11.525        | 3.07.E+08         | 3.12.E+08         | 3.00.E+08         | 2.67.E+08         | 2.81.E+08            | 2.65.E+08            | 2.77.E+08            | 3.03.E+08            | 2.83.E+08            | 2.68.E+08            | 2.75.E+08            | 2.76.E+08            |
| 1956 | Q9Y619    | mitochondrial ornithine transporter 1 [OS=Homo sapiens]                           | 11.441        |                   | 1.33.E+05         |                   | 1.45.E+06         | 3.75.E+05            |                      | 1.02.E+06            |                      |                      |                      |                      |                      |
| 1957 | Q9Y5P6    | Mannose-1-phosphate guanylttransferase beta [OS=Homo sapiens]                     | 11.433        | 6.00.E+07         |                   | 6.72.E+07         | 6.76.E+07         | 6.97.E+07            | 7.21.E+07            | 5.15.E+07            | 5.04.E+07            | 7.89.E+07            | 7.75.E+07            | 8.50.E+07            | 7.78.E+07            |

| No.  | Accession | Description                                                                                      | Sum PEP Score | CTRL Abundances_1 | CTRL Abundances_2 | CTRL Abundances_3 | CTRL Abundances_4 | CLDN6-1 Abundances_1 | CLDN6-1 Abundances_2 | CLDN6-1 Abundances_3 | CLDN6-1 Abundances_4 | CLDN6-2 Abundances_1 | CLDN6-2 Abundances_2 | CLDN6-2 Abundances_3 | CLDN6-2 Abundances_4 |
|------|-----------|--------------------------------------------------------------------------------------------------|---------------|-------------------|-------------------|-------------------|-------------------|----------------------|----------------------|----------------------|----------------------|----------------------|----------------------|----------------------|----------------------|
| 1958 | P61009    | Signal peptidase complex subunit 3 [OS=Homo sapiens]                                             | 11.424        | 1.38.E+08         | 9.21.E+07         | 9.50.E+07         | 1.02.E+08         | 9.62.E+07            | 1.07.E+08            | 1.08.E+08            | 1.10.E+08            | 1.05.E+08            | 1.09.E+08            | 1.00.E+08            | 9.89.E+07            |
| 1959 | P52948-1  | nuclear pore complex protein Nup98-Nup96 [OS=Homo sapiens]                                       | 11.405        | 1.41.E+07         | 1.45.E+07         | 1.63.E+07         | 5.74.E+06         | 9.02.E+06            | 1.21.E+07            | 1.05.E+07            | 1.32.E+07            | 3.52.E+06            | 1.35.E+07            | 1.32.E+07            | 1.24.E+07            |
| 1960 | Q13867    | bleomycin hydrolase [OS=Homo sapiens]                                                            | 11.399        | 5.35.E+07         | 5.45.E+07         | 5.59.E+07         | 5.30.E+07         | 4.97.E+07            | 5.23.E+07            | 5.61.E+07            | 4.98.E+07            | 6.68.E+07            | 6.88.E+07            | 7.17.E+07            | 7.58.E+07            |
| 1961 | P40222    | alpha-taxilin [OS=Homo sapiens]                                                                  | 11.382        | 2.02.E+07         | 2.13.E+07         | 2.20.E+07         | 2.15.E+07         | 1.82.E+07            | 2.14.E+07            | 2.18.E+07            | 2.07.E+07            | 1.93.E+07            | 2.61.E+07            | 2.43.E+07            | 2.32.E+07            |
| 1962 | Q96KA5-1  | cleft lip and palate transmembrane protein 1-like protein [OS=Homo sapiens]                      | 11.367        | 3.28.E+07         | 2.30.E+07         | 2.57.E+07         | 3.12.E+07         | 2.88.E+07            | 2.88.E+07            | 3.01.E+07            | 2.51.E+07            | 2.03.E+07            | 2.14.E+07            | 2.11.E+07            | 1.85.E+07            |
| 1963 | Q96HS1-1  | Serine/threonine-protein phosphatase Pgam5, mitochondrial [OS=Homo sapiens]                      | 11.366        | 7.56.E+07         | 1.07.E+08         | 1.32.E+08         | 1.23.E+08         | 1.09.E+08            | 1.19.E+08            | 9.78.E+07            | 1.05.E+08            | 8.65.E+07            | 1.39.E+08            | 1.45.E+08            | 1.41.E+08            |
| 1964 | P19525    | interferon-induced, double-stranded RNA-activated protein kinase [OS=Homo sapiens]               | 11.341        | 3.29.E+07         | 2.26.E+07         | 2.76.E+07         | 2.61.E+07         | 3.16.E+07            | 3.30.E+07            | 3.56.E+07            | 3.08.E+07            | 2.99.E+07            | 3.42.E+07            | 3.41.E+07            | 2.88.E+07            |
| 1965 | Q16539    | Mitogen-activated protein kinase 14 [OS=Homo sapiens]                                            | 11.329        | 3.21.E+06         | 4.41.E+06         | 1.41.E+06         | 4.39.E+06         | 7.65.E+06            | 7.10.E+06            | 4.39.E+06            | 4.40.E+06            | 6.98.E+06            | 3.47.E+06            | 2.35.E+06            | 4.55.E+06            |
| 1966 | P67870    | Casein kinase II subunit beta [OS=Homo sapiens]                                                  | 11.325        | 9.06.E+07         | 9.55.E+07         | 1.02.E+08         | 1.06.E+08         | 8.95.E+07            | 9.81.E+07            | 9.62.E+07            | 9.27.E+07            | 1.06.E+08            | 1.20.E+08            | 1.16.E+08            | 1.07.E+08            |
| 1967 | P10721-1  | Mast/stem cell growth factor receptor Kit [OS=Homo sapiens]                                      | 11.297        | 5.34.E+07         | 7.65.E+07         | 9.64.E+07         | 8.48.E+07         | 3.18.E+07            | 3.53.E+07            | 4.12.E+07            | 4.21.E+07            | 6.43.E+07            | 6.54.E+07            | 6.37.E+07            | 6.95.E+07            |
| 1968 | O15258    | Protein RER1 [OS=Homo sapiens]                                                                   | 11.293        | 2.11.E+08         | 2.33.E+08         | 2.49.E+08         | 2.11.E+08         | 1.99.E+08            | 2.03.E+08            | 1.90.E+08            | 2.09.E+08            | 2.00.E+08            | 2.03.E+08            | 1.99.E+08            | 1.81.E+08            |
| 1969 | Q99808    | Equilibrative nucleoside transporter 1 [OS=Homo sapiens]                                         | 11.127        | 1.17.E+07         | 9.67.E+06         | 1.15.E+07         | 1.13.E+07         | 1.51.E+07            | 1.38.E+07            | 1.63.E+07            | 1.68.E+07            | 7.20.E+06            | 8.32.E+06            | 1.02.E+07            | 9.12.E+06            |
| 1970 | Q15642    | Cdc42-interacting protein 4 [OS=Homo sapiens]                                                    | 11.263        | 5.44.E+06         | 1.66.E+07         | 2.74.E+07         | 7.38.E+06         | 4.79.E+06            | 8.71.E+06            | 5.13.E+06            | 8.00.E+06            | 1.10.E+07            | 3.41.E+07            | 3.22.E+07            | 4.96.E+07            |
| 1971 | Q9H078-1  | Caseinolytic peptidase B protein homolog [OS=Homo sapiens]                                       | 11.234        | 4.21.E+07         | 4.29.E+07         | 4.17.E+07         | 4.09.E+07         | 3.55.E+07            | 3.26.E+07            | 3.79.E+07            | 4.09.E+07            | 4.19.E+07            | 4.10.E+07            | 4.64.E+07            | 4.58.E+07            |
| 1972 | Q5BJD5-1  | Transmembrane protein 41B [OS=Homo sapiens]                                                      | 11.218        | 7.02.E+06         | 7.02.E+06         | 5.84.E+06         | 7.13.E+06         | 6.61.E+06            | 5.20.E+06            | 5.25.E+06            | 4.76.E+06            | 6.67.E+06            | 5.37.E+06            | 5.91.E+06            | 5.34.E+06            |
| 1973 | Q9NZL9    | Methionine adenosyltransferase 2 subunit beta [OS=Homo sapiens]                                  | 11.201        | 6.04.E+07         | 6.35.E+07         | 6.36.E+07         | 6.08.E+07         | 6.02.E+07            | 5.74.E+07            | 5.79.E+07            | 6.30.E+07            | 6.78.E+07            | 6.82.E+07            | 7.06.E+07            | 7.38.E+07            |
| 1974 | Q14061    | Cytochrome c oxidase copper chaperone OS=Homo sapiens OX=9606 GN=COX17 PE=1 SV=2                 | 11.2          | 5.53.E+06         | 7.17.E+06         | 7.47.E+06         | 8.06.E+06         | 5.59.E+06            | 5.80.E+06            | 7.95.E+06            | 6.21.E+06            | 5.40.E+06            | 6.95.E+06            | 7.35.E+06            | 6.18.E+06            |
| 1975 | P15328    | Folate receptor alpha [OS=Homo sapiens]                                                          | 11.199        | 2.71.E+06         | 1.47.E+06         |                   | 5.61.E+06         |                      |                      |                      |                      | 9.13.E+05            |                      | 1.70.E+07            | 1.59.E+07            |
| 1976 | Q15042-1  | Rab3 GTPase-activating protein catalytic subunit [OS=Homo sapiens]                               | 11.166        | 1.26.E+07         | 1.16.E+07         | 1.32.E+07         | 1.41.E+07         | 1.16.E+07            | 1.44.E+07            | 1.58.E+07            | 1.28.E+07            | 1.12.E+07            | 1.37.E+07            | 1.30.E+07            | 1.57.E+07            |
| 1977 | Q96HY6-1  | DDRKG domain-containing protein 1 [OS=Homo sapiens]                                              | 11.133        | 1.02.E+08         | 1.07.E+08         | 1.20.E+08         | 1.13.E+08         | 9.54.E+07            | 1.13.E+08            | 1.06.E+08            | 1.06.E+08            | 9.77.E+07            | 1.23.E+08            | 1.18.E+08            | 1.18.E+08            |
| 1978 | Q96T37-1  | Putative RNA-binding protein 15 [OS=Homo sapiens]                                                | 11.123        | 1.46.E+07         | 1.44.E+07         | 1.18.E+07         | 1.48.E+07         | 1.05.E+07            | 1.34.E+07            | 1.03.E+07            | 1.38.E+07            | 1.09.E+07            | 1.44.E+07            | 1.07.E+07            | 1.46.E+07            |
| 1979 | Q8NFV4    | Protein Abhd11 [OS=Homo sapiens]                                                                 | 11.084        | 1.51.E+07         | 1.50.E+07         | 1.80.E+07         | 9.95.E+06         | 1.92.E+07            | 2.01.E+07            | 2.09.E+07            | 1.23.E+07            | 1.32.E+07            | 1.49.E+07            | 1.12.E+07            | 1.12.E+07            |
| 1980 | O43488    | afatoxin B1 aldehyde reductase member 2 [OS=Homo sapiens]                                        | 11.07         | 4.73.E+07         | 4.30.E+07         | 4.73.E+07         | 4.48.E+07         | 4.08.E+07            | 3.96.E+07            | 3.86.E+07            | 4.28.E+07            | 4.55.E+07            | 4.18.E+07            | 4.22.E+07            | 4.84.E+07            |
| 1981 | Q9Y5K6    | CD2-associated protein [OS=Homo sapiens]                                                         | 11.048        | 6.74.E+07         | 5.48.E+07         | 2.37.E+07         | 2.55.E+07         | 5.16.E+07            | 6.50.E+07            | 2.91.E+07            | 5.82.E+07            | 2.48.E+07            | 5.61.E+07            | 4.26.E+07            | 2.54.E+07            |
| 1982 | P10301    | Ras-related protein R-Ras [OS=Homo sapiens]                                                      | 11.025        | 1.15.E+07         | 2.45.E+07         | 2.36.E+07         | 2.30.E+07         | 1.99.E+07            | 3.13.E+07            | 2.61.E+07            | 2.63.E+07            | 1.27.E+07            | 2.37.E+07            | 2.47.E+07            | 2.57.E+07            |
| 1983 | O15514    | DNA-directed RNA polymerase II subunit RPB4 [OS=Homo sapiens]                                    | 11.022        | 4.12.E+07         | 1.24.E+07         | 1.27.E+07         | 1.21.E+07         | 2.36.E+07            | 1.17.E+07            |                      | 1.55.E+07            | 1.27.E+07            | 1.18.E+07            | 1.02.E+07            | 4.09.E+06            |
| 1984 | P55854    | Small ubiquitin-related modifier 3 [OS=Homo sapiens]                                             | 11.021        | 3.87.E+08         | 4.19.E+08         | 4.55.E+08         | 4.43.E+08         | 4.15.E+08            | 4.61.E+08            | 4.45.E+08            | 4.70.E+08            | 3.36.E+08            | 4.28.E+08            | 4.20.E+08            | 4.10.E+08            |
| 1985 | Q5T8P6    | RNA-binding protein 26 [OS=Homo sapiens]                                                         | 11.012        | 1.30.E+07         | 1.27.E+07         | 1.28.E+07         | 1.48.E+07         | 1.53.E+07            | 1.43.E+07            | 1.51.E+07            | 1.02.E+07            | 1.38.E+07            | 1.10.E+07            | 1.34.E+07            | 1.36.E+07            |
| 1986 | Q9BZX2-1  | Uridine-cytidine kinase 2 [OS=Homo sapiens]                                                      | 10.997        | 2.68.E+07         | 2.44.E+07         | 2.44.E+07         | 1.00.E+07         | 1.33.E+07            | 1.47.E+07            | 1.21.E+07            | 1.57.E+07            | 1.10.E+07            | 9.65.E+06            | 1.23.E+07            | 9.82.E+06            |
| 1987 | Q16890-1  | tumor protein D53 [OS=Homo sapiens]                                                              | 10.991        | 5.53.E+07         | 5.62.E+07         | 5.93.E+07         | 6.15.E+07         | 4.64.E+07            | 6.95.E+07            | 4.44.E+07            | 4.55.E+07            |                      | 4.06.E+07            | 3.72.E+07            | 3.99.E+07            |
| 1988 | Q9Y6M9    | NADH dehydrogenase [ubiquinone] 1 beta subcomplex subunit 9 [OS=Homo sapiens]                    | 10.983        | 9.49.E+07         | 8.19.E+07         | 9.44.E+07         | 9.46.E+07         | 8.25.E+07            | 8.10.E+07            | 9.32.E+07            | 8.01.E+07            | 9.58.E+07            | 1.05.E+08            | 9.95.E+07            | 8.06.E+07            |
| 1989 | P08559    | Pyruvate dehydrogenase E1 component subunit alpha, somatic form, mitochondrial [OS=Homo sapiens] | 10.975        | 2.83.E+07         | 2.80.E+07         | 2.35.E+07         | 2.31.E+07         | 2.34.E+07            | 2.05.E+07            | 2.23.E+07            | 2.19.E+07            | 3.12.E+07            | 2.63.E+07            | 2.84.E+07            | 2.42.E+07            |
| 1990 | P52756    | RNA-binding protein 5 [OS=Homo sapiens]                                                          | 10.966        | 7.03.E+06         | 5.45.E+06         | 5.59.E+06         | 4.51.E+06         | 4.17.E+06            | 4.61.E+06            | 4.35.E+06            | 3.65.E+06            | 4.79.E+06            | 4.33.E+06            | 4.63.E+06            | 3.39.E+06            |
| 1991 | Q14677-1  | Clathrin interactor 1 [OS=Homo sapiens]                                                          | 10.958        | 6.57.E+07         | 7.41.E+07         | 6.75.E+07         | 6.98.E+07         | 4.86.E+07            | 4.77.E+07            | 5.04.E+07            | 5.59.E+07            | 6.39.E+07            | 4.77.E+07            | 5.34.E+07            | 5.36.E+07            |
| 1992 | Q16762    | thiosulfate sulfurtransferase [OS=Homo sapiens]                                                  | 10.948        | 1.65.E+07         | 2.86.E+07         | 2.08.E+07         | 2.40.E+07         | 1.49.E+07            | 1.74.E+07            | 2.17.E+07            | 2.27.E+07            | 3.08.E+07            | 3.89.E+07            | 3.31.E+07            | 3.38.E+07            |
| 1993 | Q9NRF9    | DNA polymerase epsilon subunit 3 [OS=Homo sapiens]                                               | 10.943        | 2.11.E+07         | 1.98.E+07         | 2.27.E+07         | 2.35.E+07         | 1.89.E+07            | 2.28.E+07            | 2.17.E+07            | 2.15.E+07            | 1.67.E+07            | 2.04.E+07            | 2.14.E+07            | 1.91.E+07            |
| 1994 | O43633    | charged multivesicular body protein 2a [OS=Homo sapiens]                                         | 10.923        | 2.07.E+07         | 1.68.E+07         | 2.30.E+07         | 2.74.E+07         | 2.61.E+07            | 2.87.E+07            | 3.55.E+07            | 3.74.E+07            | 2.21.E+07            | 2.03.E+07            | 2.07.E+07            | 2.03.E+07            |
| 1995 | Q9BWJ5    | Splicing factor 3B subunit 5 [OS=Homo sapiens]                                                   | 10.89         | 6.81.E+07         | 7.85.E+07         | 7.13.E+07         | 7.35.E+07         | 5.57.E+07            | 5.41.E+07            | 5.00.E+07            | 5.22.E+07            | 7.28.E+07            | 6.96.E+07            | 7.46.E+07            | 7.11.E+07            |
| 1996 | Q9NRL3    | Striatin-4 [OS=Homo sapiens]                                                                     | 10.877        |                   |                   |                   |                   |                      |                      |                      |                      |                      |                      |                      |                      |
| 1997 | Q5SRE5    | Nucleoporin NUP188 homolog [OS=Homo sapiens]                                                     | 10.868        | 4.14.E+06         | 2.90.E+06         | 3.43.E+06         | 4.32.E+06         | 3.46.E+06            | 5.19.E+06            | 4.14.E+06            | 5.92.E+06            | 2.89.E+06            | 4.59.E+06            | 3.60.E+06            | 6.88.E+06            |
| 1998 | Q95777    | U6 snRNA-associated Sm-like protein LSm8 [OS=Homo sapiens]                                       | 10.867        | 5.11.E+07         | 4.86.E+07         | 4.90.E+07         | 5.72.E+07         | 5.57.E+07            | 5.01.E+07            | 4.44.E+07            | 4.98.E+07            | 4.31.E+07            | 4.62.E+07            | 4.68.E+07            | 5.39.E+07            |
| 1999 | Q9NRX2    | 39S ribosomal protein L17, mitochondrial [OS=Homo sapiens]                                       | 10.866        | 1.94.E+07         | 1.86.E+07         | 1.62.E+07         | 1.92.E+07         | 1.91.E+07            | 1.67.E+07            | 1.62.E+07            | 1.18.E+07            | 1.48.E+07            | 1.20.E+07            | 1.31.E+07            | 1.52.E+07            |
| 2000 | P43357    | Melanoma-associated antigen 3 [OS=Homo sapiens]                                                  | 10.849        | 1.83.E+07         | 1.40.E+07         | 2.02.E+07         | 1.12.E+07         | 1.69.E+07            | 2.28.E+07            | 1.32.E+07            | 1.56.E+07            | 1.30.E+07            | 1.26.E+07            | 1.21.E+07            | 1.39.E+07            |
| 2001 | Q9NXR7-2  | BRIS and BRCA1-A complex member 2 [OS=Homo sapiens]                                              | 10.847        | 1.43.E+07         | 1.50.E+07         | 2.71.E+06         | 2.10.E+07         | 1.62.E+07            | 1.40.E+07            | 1.56.E+07            | 1.60.E+07            | 2.18.E+07            | 2.20.E+07            | 2.28.E+07            | 2.09.E+07            |
| 2002 | Q5JS54-1  | Proteasome assembly chaperone 4 [OS=Homo sapiens]                                                | 10.815        | 9.87.E+06         | 1.11.E+07         | 8.41.E+06         | 7.57.E+06         | 1.12.E+07            | 7.51.E+06            | 8.55.E+06            | 7.07.E+06            | 9.03.E+06            | 8.25.E+06            | 8.59.E+06            | 7.28.E+06            |
| 2003 | Q13405    | 39S ribosomal protein L49, mitochondrial [OS=Homo sapiens]                                       | 10.813        | 2.01.E+07         | 1.94.E+07         | 2.04.E+07         | 2.06.E+07         | 1.48.E+07            | 1.62.E+07            | 1.62.E+07            | 1.51.E+07            | 1.83.E+07            | 1.99.E+07            | 1.75.E+07            | 1.88.E+07            |
| 2004 | O15270    | Serine palmitoyltransferase 2 [OS=Homo sapiens]                                                  | 10.753        | 2.57.E+07         | 1.02.E+07         | 1.21.E+07         | 1.46.E+07         | 1.44.E+07            | 1.40.E+07            | 1.35.E+07            | 1.09.E+07            | 1.17.E+07            | 1.16.E+07            | 1.16.E+07            | 5.02.E+06            |
| 2005 | P01111    | GTPase NRas [OS=Homo sapiens]                                                                    | 10.735        | 4.49.E+07         | 4.40.E+07         | 4.65.E+07         | 5.20.E+07         | 4.22.E+07            | 3.53.E+07            | 4.72.E+07            | 4.72.E+07            | 4.08.E+07            | 3.58.E+07            | 4.16.E+07            | 5.09.E+07            |
| 2006 | Q9NYP7-1  | elongation of very long chain fatty acids protein 5 [OS=Homo sapiens]                            | 10.734        | 1.27.E+07         | 1.18.E+07         | 1.33.E+07         | 1.83.E+07         | 9.76.E+06            | 1.61.E+07            | 1.17.E+07            | 9.04.E+06            | 1.41.E+07            | 1.60.E+07            | 1.21.E+07            | 1.13.E+07            |
| 2007 | O00468    | Agrin OS=Homo sapiens OX=9606 GN=AGRN PE=1 SV=6                                                  | 10.726        | 4.52.E+06         | 1.72.E+06         |                   | 3.93.E+06         | 3.50.E+06            | 3.20.E+06            | 3.77.E+06            | 2.19.E+06            | 2.74.E+06            | 2.47.E+06            | 2.06.E+06            | 6.37.E+05            |
| 2008 | P49356    | protein farnesyltransferase subunit beta [OS=Homo sapiens]                                       | 10.723        | 1.25.E+07         | 9.53.E+06         | 9.07.E+06         | 1.04.E+07         | 9.70.E+06            | 1.13.E+07            | 1.03.E+07            | 8.42.E+06            | 1.02.E+07            | 1.23.E+07            | 9.70.E+06            | 9.25.E+06            |
| 2009 | Q13404    | Ubiquitin-conjugating enzyme E2 variant 1 [OS=Homo sapiens]                                      | 10.72         | 4.57.E+08         | 4.51.E+08         | 4.30.E+08         | 4.29.E+08         | 3.99.E+08            | 3.95.E+08            | 4.02.E+08            | 4.15.E+08            | 5.28.E+08            | 4.90.E+08            | 4.71.E+08            | 4.49.E+08            |
| 2010 | Q9Y512    | sorting and assembly machinery component 50 homolog [OS=Homo sapiens]                            | 10.703        | 5.56.E+07         | 6.03.E+07         | 4.96.E+07         | 6.73.E+07         | 4.35.E+07            | 4.68.E+07            | 5.13.E+07            | 4.64.E+07            | 6.63.E+07            | 5.38.E+07            | 5.66.E+07            | 5.27.E+07            |
| 2011 | P40937-1  | Replication factor C subunit 5 [OS=Homo sapiens]                                                 | 10.681        | 1.38.E+07         | 1.44.E+07         | 5.50.E+06         | 1.21.E+07         | 1.56.E+07            | 1.45.E+07            | 7.59.E+06            | 1.50.E+07            | 1.47.E+07            | 1.56.E+07            | 2.15.E+07            | 1.61.E+07            |
| 2012 | Q9BTD8-1  | RNA-binding protein 42 [OS=Homo sapiens]                                                         | 10.677        | 9.57.E+06         | 1.33.E+07         | 9.81.E+06         | 1.27.E+07         | 1.13.E+07            | 9.50.E+06            | 1.73.E+07            | 7.58.E+06            | 1.48.E+07            | 5.91.E+06            | 1.01.E+07            | 1.73.E+07            |

| No.  | Accession | Description                                                                                         | Sum PEP Score | CTRL Abundances_1 | CTRL Abundances_2 | CTRL Abundances_3 | CTRL Abundances_4 | CLDN6-1 Abundances_1 | CLDN6-1 Abundances_2 | CLDN6-1 Abundances_3 | CLDN6-1 Abundances_4 | CLDN6-2 Abundances_1 | CLDN6-2 Abundances_2 | CLDN6-2 Abundances_3 | CLDN6-2 Abundances_4 |
|------|-----------|-----------------------------------------------------------------------------------------------------|---------------|-------------------|-------------------|-------------------|-------------------|----------------------|----------------------|----------------------|----------------------|----------------------|----------------------|----------------------|----------------------|
| 2013 | P31937    | 3-hydroxyisobutyrate dehydrogenase, mitochondrial [OS=Homo sapiens]                                 | 10.664        | 8.85.E+06         | 1.10.E+07         | 6.72.E+06         | 1.05.E+07         | 9.57.E+06            | 1.08.E+07            | 9.60.E+06            | 9.27.E+06            | 9.92.E+06            | 1.15.E+07            | 1.20.E+07            | 1.11.E+07            |
| 2014 | P46939    | Utrophin [OS=Homo sapiens]                                                                          | 10.652        | 1.39.E+07         | 1.44.E+07         | 1.60.E+07         | 1.76.E+07         | 1.34.E+07            | 1.64.E+07            | 2.19.E+07            | 1.67.E+07            | 1.58.E+07            | 1.46.E+07            | 1.09.E+07            | 2.03.E+07            |
| 2015 | Q01628    | Interferon-induced transmembrane protein 3 [OS=Homo sapiens]                                        | 10.635        |                   |                   |                   |                   |                      |                      |                      |                      |                      |                      |                      |                      |
| 2016 | P11172    | uridine 5'-monophosphate synthase [OS=Homo sapiens]                                                 | 10.632        | 2.38.E+07         | 2.50.E+07         | 2.03.E+07         | 2.29.E+07         | 8.98.E+06            | 2.44.E+07            | 2.71.E+07            | 1.81.E+07            | 2.36.E+07            | 2.64.E+07            | 2.43.E+07            | 1.98.E+07            |
| 2017 | Q9C0C2    | 182 kDa tankyrase-1-binding protein [OS=Homo sapiens]                                               | 10.63         | 4.06.E+06         | 4.15.E+06         | 3.90.E+06         | 4.99.E+06         | 6.77.E+06            | 7.03.E+06            | 7.21.E+06            | 6.22.E+06            | 7.43.E+06            | 6.74.E+06            | 6.76.E+06            | 6.12.E+06            |
| 2018 | P61803    | Dolichyl-diphosphooligosaccharide--protein glycosyltransferase subunit DAD1 [OS=Homo sapiens]       | 10.623        | 1.17.E+08         | 1.19.E+08         | 1.26.E+08         | 1.19.E+08         | 1.11.E+08            | 1.26.E+08            | 1.23.E+08            | 1.19.E+08            | 1.23.E+08            | 1.22.E+08            | 1.21.E+08            | 1.14.E+08            |
| 2019 | O00161    | Synaptosomal-associated protein 23 [OS=Homo sapiens]                                                | 10.617        | 9.24.E+06         | 1.12.E+07         | 1.18.E+07         | 1.03.E+07         | 8.72.E+06            | 8.51.E+06            | 7.67.E+06            | 7.81.E+06            | 1.03.E+07            | 1.18.E+07            | 1.23.E+07            | 1.23.E+07            |
| 2020 | Q9H9Q4-1  | non-homologous end-joining factor 1 [OS=Homo sapiens]                                               | 10.614        | 2.18.E+07         | 1.48.E+07         | 2.26.E+07         | 1.50.E+05         | 1.81.E+07            | 1.50.E+07            | 1.89.E+07            | 1.89.E+07            | 1.74.E+07            | 8.43.E+06            | 2.21.E+07            | 1.60.E+07            |
| 2021 | Q9GZL7    | ribosome biogenesis protein WDR12 [OS=Homo sapiens]                                                 | 10.603        | 3.30.E+07         | 2.17.E+07         | 3.34.E+07         | 2.82.E+07         | 6.09.E+06            | 2.75.E+07            | 3.08.E+07            | 3.11.E+07            | 2.97.E+07            | 3.00.E+07            | 3.65.E+07            | 3.66.E+07            |
| 2022 | Q9C0C9    | (E3-independent) E2 ubiquitin-conjugating enzyme [OS=Homo sapiens]                                  | 10.574        | 1.49.E+07         | 1.77.E+07         | 1.75.E+07         | 1.70.E+07         | 1.43.E+07            | 1.24.E+07            | 1.27.E+07            | 1.32.E+07            | 1.38.E+07            | 1.66.E+07            | 1.37.E+07            | 1.43.E+07            |
| 2023 | O96013-1  | serine/threonine-protein kinase PAK 4 [OS=Homo sapiens]                                             | 10.564        | 2.38.E+06         | 8.70.E+06         | 1.02.E+06         | 1.94.E+05         |                      |                      |                      |                      | 1.42.E+07            |                      |                      | 6.62.E+06            |
| 2024 | P49005    | DNA polymerase delta subunit 2 [OS=Homo sapiens]                                                    | 10.562        | 1.82.E+07         | 2.24.E+07         | 2.16.E+07         | 2.12.E+07         | 2.36.E+07            | 2.40.E+07            | 2.46.E+07            | 2.20.E+07            | 2.41.E+07            | 2.13.E+07            | 2.12.E+07            | 2.02.E+07            |
| 2025 | O15382    | Branched-chain-amino-acid aminotransferase, mitochondrial [OS=Homo sapiens]                         | 10.556        | 2.16.E+07         | 2.30.E+07         | 2.21.E+07         | 2.51.E+07         | 3.36.E+07            | 3.27.E+07            | 3.04.E+07            | 2.80.E+07            | 2.09.E+07            | 1.68.E+07            | 1.99.E+07            | 1.81.E+07            |
| 2026 | P49585    | choline-phosphate cytidylyltransferase A [OS=Homo sapiens]                                          | 10.553        | 8.77.E+06         | 1.03.E+07         |                   | 1.09.E+07         | 1.44.E+07            | 1.24.E+07            | 1.58.E+07            | 1.17.E+07            |                      |                      | 8.35.E+06            | 1.10.E+07            |
| 2027 | O75381-1  | Peroxisomal membrane protein PEX14 [OS=Homo sapiens]                                                | 10.539        | 4.07.E+05         |                   | 1.36.E+06         | 2.50.E+06         |                      |                      | 5.21.E+05            |                      |                      |                      |                      |                      |
| 2028 | Q99614    | tetratricopeptide repeat protein 1 [OS=Homo sapiens]                                                | 10.53         | 1.22.E+07         | 1.48.E+07         | 1.46.E+07         | 1.55.E+07         | 1.51.E+07            | 1.63.E+07            | 1.71.E+07            |                      | 1.41.E+07            | 1.45.E+07            | 1.50.E+07            | 1.53.E+07            |
| 2029 | Q8WW12    | PEST proteolytic signal-containing nuclear protein [OS=Homo sapiens]                                | 10.526        | 1.28.E+07         | 1.30.E+07         | 1.46.E+07         | 1.29.E+07         | 1.65.E+07            | 1.74.E+07            | 1.76.E+07            | 1.70.E+07            | 1.67.E+07            | 1.81.E+07            | 1.61.E+07            | 1.50.E+07            |
| 2030 | Q96HR8    | H/ACA ribonucleoprotein complex non-core subunit NAF1 [OS=Homo sapiens]                             | 10.516        |                   |                   |                   |                   |                      |                      |                      |                      |                      |                      |                      |                      |
| 2031 | Q9NT62    | ubiquitin-like-conjugating enzyme ATG3 [OS=Homo sapiens]                                            | 10.516        | 6.29.E+07         | 5.83.E+07         | 5.83.E+07         | 6.07.E+07         | 6.03.E+07            | 6.02.E+07            | 5.96.E+07            | 3.90.E+07            | 7.71.E+07            | 7.99.E+07            | 7.77.E+07            | 9.63.E+07            |
| 2032 | Q9H5Q4    | Dimethyladenosine transferase 2, mitochondrial [OS=Homo sapiens]                                    | 10.509        | 1.21.E+07         | 8.29.E+06         | 8.59.E+06         | 9.90.E+06         | 6.71.E+06            | 9.37.E+06            | 8.21.E+06            | 6.39.E+06            | 1.86.E+07            | 1.44.E+07            | 2.09.E+07            | 1.95.E+07            |
| 2033 | Q9BPX5    | actin-related protein 2/3 complex subunit 5-like protein [OS=Homo sapiens]                          | 10.471        | 5.55.E+07         | 5.36.E+07         | 5.95.E+07         | 5.72.E+07         | 5.61.E+07            | 5.60.E+07            | 5.65.E+07            | 5.62.E+07            | 6.12.E+07            | 5.90.E+07            | 5.82.E+07            | 5.93.E+07            |
| 2034 | Q9NR50-1  | Translation initiation factor eIF-2B subunit gamma [OS=Homo sapiens]                                | 10.453        | 2.01.E+07         | 2.56.E+07         | 3.07.E+07         | 2.86.E+07         | 1.57.E+07            | 3.11.E+07            | 2.69.E+07            | 2.72.E+07            | 3.86.E+07            | 3.45.E+07            | 2.87.E+07            | 2.31.E+07            |
| 2035 | Q14165    | Malectin [OS=Homo sapiens]                                                                          | 10.446        |                   | 2.62.E+07         | 2.66.E+07         | 2.55.E+07         | 2.49.E+07            | 3.83.E+07            | 4.74.E+07            | 3.06.E+07            | 5.39.E+06            | 2.87.E+07            | 1.90.E+07            | 2.49.E+07            |
| 2036 | Q96L92    | Sorting nexin-27 [OS=Homo sapiens]                                                                  | 10.435        | 9.91.E+06         | 6.54.E+05         | 4.00.E+06         |                   | 9.93.E+05            |                      |                      | 5.29.E+05            | 9.67.E+06            | 2.28.E+06            | 1.46.E+07            | 1.64.E+06            |
| 2037 | Q9BU23-1  | Lipase maturation factor 2 [OS=Homo sapiens]                                                        | 10.421        | 1.06.E+07         | 1.29.E+07         | 1.05.E+07         | 1.51.E+07         | 1.29.E+07            | 1.14.E+07            | 1.50.E+07            | 1.21.E+07            | 9.33.E+06            | 1.28.E+07            | 9.54.E+06            | 1.06.E+07            |
| 2038 | P13807    | glycogen [starch] synthase, muscle [OS=Homo sapiens]                                                | 10.414        | 3.96.E+07         | 2.59.E+07         | 3.60.E+07         | 3.28.E+07         | 4.38.E+07            | 3.86.E+07            | 4.76.E+07            | 2.94.E+07            | 2.76.E+07            | 2.26.E+07            | 1.89.E+07            | 1.95.E+07            |
| 2039 | Q9UHN6-1  | Cell surface hyaluronidase [OS=Homo sapiens]                                                        | 10.382        | 1.31.E+07         | 1.30.E+07         | 1.42.E+07         | 1.21.E+07         | 1.37.E+07            | 1.03.E+07            | 1.10.E+07            | 1.13.E+07            | 9.03.E+06            | 8.60.E+06            | 6.03.E+06            | 7.67.E+06            |
| 2040 | O43660-1  | Pleiotropic regulator 1 [OS=Homo sapiens]                                                           | 10.374        |                   |                   |                   |                   |                      |                      |                      |                      |                      |                      |                      |                      |
| 2041 | Q15005    | Signal peptidase complex subunit 2 [OS=Homo sapiens]                                                | 10.371        | 1.11.E+08         | 1.11.E+08         | 1.26.E+08         | 1.25.E+08         | 1.13.E+08            | 1.19.E+08            | 1.14.E+08            | 1.26.E+08            | 1.13.E+08            | 1.24.E+08            | 1.29.E+08            | 1.19.E+08            |
| 2042 | O00233-1  | 26S proteasome non-ATPase regulatory subunit 9 [OS=Homo sapiens]                                    | 10.35         | 4.24.E+07         | 4.20.E+07         | 5.25.E+07         | 4.30.E+07         | 4.74.E+07            | 4.60.E+07            | 4.89.E+07            | 5.35.E+07            | 1.54.E+07            | 5.96.E+07            | 6.00.E+07            | 5.35.E+07            |
| 2043 | O14949    | Cytochrome b-c1 complex subunit 8 [OS=Homo sapiens]                                                 | 10.347        | 1.40.E+08         | 1.47.E+08         | 1.46.E+08         | 1.58.E+08         | 1.35.E+08            | 1.36.E+08            | 1.40.E+08            | 1.37.E+08            | 1.40.E+08            | 1.13.E+08            | 1.48.E+08            | 1.37.E+08            |
| 2044 | P31751    | RAC-beta serine/threonine-protein kinase [OS=Homo sapiens]                                          | 10.333        | 3.55.E+06         | 1.76.E+06         | 3.02.E+06         | 2.60.E+06         | 4.88.E+06            | 4.22.E+06            | 4.69.E+06            | 3.53.E+06            | 3.20.E+06            | 1.09.E+06            | 2.40.E+06            | 1.96.E+06            |
| 2045 | Q5RKV6    | Exosome complex component MTR3 [OS=Homo sapiens]                                                    | 10.329        | 1.79.E+07         | 2.16.E+07         | 2.42.E+07         | 2.73.E+07         | 2.43.E+07            | 2.49.E+07            | 2.53.E+07            | 2.51.E+07            | 2.60.E+07            | 2.42.E+07            | 2.44.E+07            | 2.24.E+07            |
| 2046 | Q9Y4X5    | E3 ubiquitin-protein ligase ARIH1 [OS=Homo sapiens]                                                 | 10.249        | 4.56.E+07         | 4.61.E+07         | 4.32.E+07         | 4.40.E+07         | 4.99.E+07            | 4.61.E+07            | 4.20.E+07            | 4.66.E+07            | 4.76.E+07            | 4.34.E+07            | 4.97.E+07            | 4.85.E+07            |
| 2047 | Q16625-1  | Occludin [OS=Homo sapiens]                                                                          | 10.224        | 1.33.E+07         | 1.09.E+07         | 1.18.E+07         | 1.39.E+07         | 1.26.E+07            | 1.21.E+07            | 1.25.E+07            | 1.43.E+07            | 7.65.E+06            |                      | 8.07.E+06            |                      |
| 2048 | P24468    | COUP transcription factor 2 [OS=Homo sapiens]                                                       | 10.221        | 5.94.E+06         | 5.18.E+06         | 5.75.E+06         | 5.67.E+06         | 5.50.E+06            | 4.72.E+06            | 4.45.E+06            | 3.84.E+06            | 4.52.E+06            | 4.74.E+06            | 3.77.E+06            | 4.22.E+06            |
| 2049 | O15294    | UDP-N-acetylglucosamine--peptide N-acetylglucosaminyltransferase 110 kDa subunit [OS=Homo sapiens]  | 10.207        | 1.31.E+07         | 9.62.E+06         | 9.86.E+06         | 4.79.E+06         | 1.09.E+07            | 2.64.E+06            | 3.14.E+06            | 7.64.E+06            | 1.24.E+07            | 1.39.E+07            | 5.67.E+06            | 1.28.E+07            |
| 2050 | P61011-1  | signal recognition particle 54 kDa protein [OS=Homo sapiens]                                        | 10.142        | 3.93.E+07         | 1.03.E+08         | 1.27.E+08         | 1.14.E+08         | 1.08.E+08            | 1.17.E+08            | 1.23.E+08            | 1.16.E+08            | 9.13.E+07            | 1.31.E+08            | 3.68.E+07            | 1.21.E+08            |
| 2051 | Q8TE77    | Protein phosphatase Slingshot homolog 3 [OS=Homo sapiens]                                           | 10.047        |                   |                   |                   |                   |                      |                      |                      |                      |                      |                      |                      |                      |
| 2052 | Q86T89    | Protein PAT1 homolog 1 [OS=Homo sapiens]                                                            | 10.035        | 1.47.E+07         | 1.14.E+07         | 1.07.E+07         | 1.62.E+07         | 1.13.E+07            | 1.08.E+07            | 1.19.E+07            | 1.03.E+07            | 1.06.E+07            | 1.66.E+07            | 1.19.E+07            | 1.18.E+07            |
| 2053 | O14561    | Acyl carrier protein, mitochondrial [OS=Homo sapiens]                                               | 9.939         | 3.18.E+07         | 1.05.E+07         | 3.19.E+07         | 6.38.E+07         | 9.53.E+07            | 8.01.E+07            | 2.82.E+07            | 1.95.E+07            | 1.09.E+08            | 2.51.E+07            | 7.77.E+07            | 6.55.E+07            |
| 2054 | P09417    | dihydropteridine reductase [OS=Homo sapiens]                                                        | 9.926         | 1.20.E+07         | 1.03.E+07         | 1.21.E+07         |                   | 1.09.E+07            | 9.69.E+06            | 1.10.E+07            | 8.25.E+06            | 8.19.E+06            | 6.28.E+06            | 8.67.E+06            | 6.45.E+06            |
| 2055 | O60613    | Selenoprotein F OS=Homo sapiens OX=9606 GN=SELENOF PE=1 SV=4                                        | 9.907         | 7.47.E+06         | 6.09.E+06         | 6.48.E+06         | 7.96.E+06         | 6.90.E+06            | 1.03.E+07            | 5.56.E+06            | 6.56.E+06            | 4.43.E+06            | 6.84.E+06            | 3.50.E+06            | 5.25.E+06            |
| 2056 | O43760    | Synaptogyrin-2 [OS=Homo sapiens]                                                                    | 9.905         | 1.43.E+08         | 1.40.E+08         | 1.37.E+08         | 1.45.E+08         | 1.42.E+08            | 9.97.E+07            | 9.30.E+07            | 9.82.E+07            | 9.85.E+07            | 8.81.E+07            | 1.65.E+08            | 9.30.E+07            |
| 2057 | Q9BVI4    | Nucleolar complex protein 4 homolog [OS=Homo sapiens]                                               | 9.895         |                   |                   | 7.62.E+06         |                   |                      |                      |                      | 7.81.E+06            | 4.00.E+06            |                      | 5.86.E+06            |                      |
| 2058 | Q9Y3Q3    | Transmembrane emp24 domain-containing protein 3 [OS=Homo sapiens]                                   | 9.884         | 3.28.E+07         | 3.50.E+07         | 3.74.E+07         | 3.23.E+07         | 3.68.E+07            | 3.45.E+07            | 3.79.E+07            | 4.47.E+07            | 3.13.E+07            | 4.16.E+07            | 3.68.E+07            | 3.76.E+07            |
| 2059 | Q9BQ61    | Uncharacterized protein C19orf43 [OS=Homo sapiens]                                                  | 9.852         | 1.65.E+07         | 1.75.E+07         | 1.89.E+07         | 1.95.E+07         | 1.58.E+07            | 1.46.E+07            | 1.51.E+07            | 1.59.E+07            | 1.67.E+07            | 1.84.E+07            | 1.94.E+07            | 1.77.E+07            |
| 2060 | Q9Y305-1  | Acyl-coenzyme A thioesterase 9, mitochondrial [OS=Homo sapiens]                                     | 9.84          | 5.50.E+07         | 4.60.E+07         | 3.90.E+07         | 4.53.E+07         | 4.75.E+07            | 6.30.E+07            | 6.15.E+07            | 5.72.E+07            | 2.87.E+07            | 2.23.E+07            | 2.00.E+07            | 2.73.E+07            |
| 2061 | Q16537    | Serine/threonine-protein phosphatase 2A 56 kDa regulatory subunit epsilon isoform [OS=Homo sapiens] | 9.794         | 2.97.E+07         | 3.01.E+07         | 3.52.E+07         | 3.61.E+07         | 2.71.E+07            | 3.20.E+07            | 2.64.E+07            | 2.97.E+07            | 2.70.E+07            | 3.37.E+07            | 2.75.E+07            | 2.37.E+07            |
| 2062 | P02042    | Hemoglobin subunit delta [OS=Homo sapiens]                                                          | 9.792         | 8.70.E+07         | 9.28.E+07         | 9.68.E+07         | 1.19.E+08         | 9.08.E+07            | 9.56.E+07            | 9.37.E+07            | 9.33.E+07            | 1.07.E+08            | 1.18.E+08            | 1.21.E+08            | 1.26.E+08            |
| 2063 | P49757    | Protein numb homolog [OS=Homo sapiens]                                                              | 9.783         | 5.61.E+07         | 5.20.E+07         | 5.52.E+07         | 2.78.E+07         | 3.30.E+07            | 5.24.E+07            | 5.31.E+07            | 4.69.E+07            | 3.57.E+07            | 5.20.E+07            | 3.38.E+07            | 5.72.E+07            |
| 2064 | P22059    | Oxysterol-binding protein 1 [OS=Homo sapiens]                                                       | 9.755         | 4.69.E+07         | 5.46.E+07         | 4.46.E+07         | 5.48.E+07         | 3.42.E+07            | 4.56.E+07            | 2.73.E+07            | 5.08.E+07            | 4.60.E+07            | 5.69.E+07            | 5.82.E+07            | 5.20.E+07            |

| No.  | Accession | Description                                                                          | Sum PEP Score | CTRL Abundances_1 | CTRL Abundances_2 | CTRL Abundances_3 | CTRL Abundances_4 | CLDN6-1 Abundances_1 | CLDN6-1 Abundances_2 | CLDN6-1 Abundances_3 | CLDN6-1 Abundances_4 | CLDN6-2 Abundances_1 | CLDN6-2 Abundances_2 | CLDN6-2 Abundances_3 | CLDN6-2 Abundances_4 |
|------|-----------|--------------------------------------------------------------------------------------|---------------|-------------------|-------------------|-------------------|-------------------|----------------------|----------------------|----------------------|----------------------|----------------------|----------------------|----------------------|----------------------|
| 2065 | Q9BYC8    | 39S ribosomal protein L32, mitochondrial [OS=Homo sapiens]                           | 9.754         | 9.39.E+06         | 1.13.E+07         | 1.18.E+07         | 1.32.E+07         | 7.98.E+06            | 9.82.E+06            | 1.01.E+07            | 9.73.E+06            | 1.23.E+07            | 1.38.E+07            | 1.33.E+07            | 1.22.E+07            |
| 2066 | P42345    | Serine/threonine-protein kinase mTOR [OS=Homo sapiens]                               | 9.736         | 7.79.E+06         | 4.43.E+06         | 2.58.E+06         | 5.92.E+06         | 6.68.E+06            | 6.94.E+06            | 4.41.E+06            | 3.51.E+06            | 4.70.E+06            | 4.46.E+06            | 2.35.E+06            | 2.58.E+06            |
| 2067 | P18858    | DNA ligase 1 [OS=Homo sapiens]                                                       | 9.735         | 6.21.E+06         | 5.06.E+06         | 5.68.E+06         | 5.76.E+06         | 9.74.E+06            | 8.99.E+06            | 9.56.E+06            | 8.13.E+06            | 5.27.E+06            | 4.59.E+06            | 5.11.E+06            | 5.65.E+06            |
| 2068 | Q5TBC7-1  | Bcl-2-like protein 15 [OS=Homo sapiens]                                              | 9.692         | 9.62.E+06         | 1.10.E+07         | 1.19.E+07         | 7.14.E+06         | 4.24.E+07            | 4.33.E+07            | 3.85.E+07            | 3.82.E+07            | 3.13.E+07            | 3.78.E+07            | 3.52.E+07            | 3.36.E+07            |
| 2069 | Q8WVW5    | cholesterol transporter-like protein 1 [OS=Homo sapiens]                             | 9.691         | 1.74.E+07         | 1.79.E+07         | 1.73.E+07         | 1.89.E+07         | 1.66.E+07            | 1.73.E+07            | 1.86.E+07            | 1.77.E+07            | 1.56.E+07            | 1.44.E+07            | 1.50.E+07            | 1.93.E+07            |
| 2070 | Q8WUUA2   | Peptidyl-prolyl cis-trans isomerase-like 4 [OS=Homo sapiens]                         | 9.656         |                   |                   |                   |                   |                      |                      |                      |                      |                      |                      |                      |                      |
| 2071 | Q15054    | DNA polymerase delta subunit 3 [OS=Homo sapiens]                                     | 9.655         | 9.77.E+06         | 9.07.E+06         | 1.12.E+07         | 1.13.E+07         | 1.10.E+07            | 1.61.E+07            | 1.06.E+07            | 1.27.E+07            | 8.46.E+06            | 1.51.E+07            | 1.79.E+07            | 1.20.E+07            |
| 2072 | Q9BY43    | Charged multivesicular body protein 4a [OS=Homo sapiens]                             | 9.648         | 1.24.E+07         | 1.40.E+07         | 3.11.E+07         | 2.10.E+07         | 1.82.E+07            | 1.72.E+07            | 2.02.E+07            | 2.30.E+07            | 1.28.E+07            | 1.55.E+07            | 1.82.E+07            | 1.73.E+07            |
| 2073 | Q96D46    | 60S ribosomal export protein NMD3 [OS=Homo sapiens]                                  | 9.639         | 3.40.E+07         | 2.81.E+07         | 2.87.E+07         | 3.63.E+07         | 3.57.E+07            | 3.26.E+07            | 2.93.E+07            | 1.53.E+07            | 2.07.E+07            | 2.52.E+07            | 4.20.E+07            | 3.30.E+07            |
| 2074 | Q13685    | angio-associated migratory cell protein [OS=Homo sapiens]                            | 9.604         | 6.32.E+06         | 7.05.E+06         | 7.67.E+06         | 7.02.E+06         | 6.01.E+06            | 6.05.E+06            | 6.10.E+06            | 5.32.E+06            | 5.71.E+06            | 6.65.E+06            | 7.32.E+06            | 5.95.E+06            |
| 2075 | Q6PHR2-1  | Serine/threonine-protein kinase ULK3 [OS=Homo sapiens]                               | 9.535         | 7.34.E+06         | 6.20.E+06         | 7.66.E+06         | 1.82.E+06         | 8.16.E+06            | 8.02.E+06            | 8.44.E+06            | 6.80.E+06            | 7.98.E+06            | 3.61.E+06            | 7.56.E+06            | 7.43.E+06            |
| 2076 | Q9UI09    | NADH dehydrogenase [ubiquinone] 1 alpha subcomplex subunit 12 [OS=Homo sapiens]      | 9.513         |                   |                   |                   |                   |                      |                      |                      |                      |                      |                      |                      |                      |
| 2077 | O75955    | Flotillin-1 [OS=Homo sapiens]                                                        | 9.489         | 3.64.E+07         | 4.13.E+07         | 4.12.E+07         | 4.88.E+07         | 5.51.E+07            | 5.79.E+07            | 5.36.E+07            | 5.16.E+07            | 6.63.E+07            | 4.91.E+07            | 5.24.E+07            | 4.49.E+07            |
| 2078 | Q9NSP4-1  | Centromere protein M [OS=Homo sapiens]                                               | 9.449         | 7.04.E+06         | 4.32.E+06         | 4.34.E+06         | 4.00.E+06         | 7.99.E+06            | 2.95.E+06            | 5.03.E+06            | 5.24.E+06            | 2.51.E+06            | 2.88.E+06            | 3.23.E+06            | 3.90.E+06            |
| 2079 | P14635    | G2/mitotic-specific cyclin-B1 [OS=Homo sapiens]                                      | 9.421         | 1.35.E+07         | 1.25.E+07         | 1.40.E+07         | 1.12.E+07         | 5.32.E+06            | 4.71.E+06            | 5.13.E+06            | 6.20.E+06            | 9.25.E+06            | 7.13.E+06            | 9.35.E+06            | 7.64.E+06            |
| 2080 | Q92620    | Pre-mRNA-splicing factor ATP-dependent RNA helicase PRP16 [OS=Homo sapiens]          | 9.405         | 1.26.E+08         | 1.30.E+08         | 1.24.E+08         | 9.52.E+07         | 1.24.E+08            | 1.18.E+08            | 1.05.E+08            | 1.02.E+08            | 1.28.E+08            | 1.26.E+08            | 1.09.E+08            | 1.13.E+08            |
| 2081 | Q9NVH0    | Exonuclease 3'-5' domain-containing protein 2 [OS=Homo sapiens]                      | 9.404         | 2.21.E+07         | 1.83.E+07         | 1.83.E+07         | 2.08.E+07         | 1.83.E+07            | 1.99.E+07            | 2.11.E+07            | 1.82.E+07            | 1.13.E+07            | 1.38.E+07            | 1.30.E+07            | 1.05.E+07            |
| 2082 | Q9H490    | Phosphatidylinositol glycan anchor biosynthesis class U protein [OS=Homo sapiens]    | 9.404         | 2.03.E+07         | 1.22.E+07         | 9.41.E+06         | 1.30.E+07         | 1.56.E+07            | 1.75.E+07            | 1.27.E+07            | 1.53.E+07            | 8.91.E+06            | 1.16.E+07            | 8.55.E+06            | 1.24.E+07            |
| 2083 | Q8TEA8    | D-tyrosyl-tRNA(Tyr) deacylase 1 [OS=Homo sapiens]                                    | 9.399         | 3.12.E+07         | 2.90.E+07         | 3.04.E+07         | 3.57.E+07         | 4.26.E+07            | 4.08.E+07            | 4.34.E+07            | 4.09.E+07            | 3.08.E+07            | 3.14.E+07            | 3.06.E+07            | 3.09.E+07            |
| 2084 | Q3MHD2    | Protein LSM12 homolog [OS=Homo sapiens]                                              | 9.36          |                   |                   |                   |                   |                      |                      |                      |                      |                      |                      |                      |                      |
| 2085 | Q9Y5J9    | mitochondrial import inner membrane translocase subunit Tim8 B [OS=Homo sapiens]     | 9.359         | 9.16.E+07         | 9.12.E+07         | 9.19.E+07         | 8.86.E+07         | 7.46.E+07            | 7.58.E+07            | 7.97.E+07            | 8.29.E+07            | 8.44.E+07            | 5.20.E+06            | 4.60.E+06            | 7.47.E+07            |
| 2086 | O60493-1  | sorting nexin-3 [OS=Homo sapiens]                                                    | 9.352         | 1.88.E+08         | 1.91.E+08         | 2.05.E+08         | 1.74.E+08         | 2.06.E+08            | 2.25.E+08            | 2.35.E+08            | 2.42.E+08            | 2.16.E+08            | 2.27.E+08            | 2.37.E+08            | 2.17.E+08            |
| 2087 | Q9NTJ5    | Phosphatidylinositol phosphatase SAC1 [OS=Homo sapiens]                              | 9.34          | 3.81.E+07         | 3.71.E+07         | 3.67.E+07         | 4.28.E+07         | 3.05.E+07            | 3.38.E+07            | 3.24.E+07            | 3.08.E+07            | 4.61.E+07            | 4.22.E+07            | 4.33.E+07            | 4.36.E+07            |
| 2088 | Q6UB35-1  | Monofunctional C1-tetrahydrofolate synthase, mitochondrial [OS=Homo sapiens]         | 9.335         | 3.70.E+07         | 3.97.E+07         | 3.66.E+07         | 3.06.E+07         | 2.86.E+07            | 3.30.E+07            | 3.17.E+07            | 3.30.E+07            | 2.48.E+07            | 2.73.E+07            | 2.82.E+07            | 2.23.E+07            |
| 2089 | Q9UBP6    | tRNA (guanine-N(7)-)-methyltransferase [OS=Homo sapiens]                             | 9.324         | 5.02.E+07         | 3.80.E+07         | 3.56.E+07         | 3.96.E+07         | 3.79.E+07            | 3.82.E+07            | 3.69.E+07            | 3.77.E+07            | 6.49.E+07            | 6.22.E+07            | 6.50.E+07            | 6.19.E+07            |
| 2090 | Q9UI12-1  | V-type proton ATPase subunit H [OS=Homo sapiens]                                     | 9.323         | 2.38.E+07         | 2.28.E+07         | 1.97.E+07         | 3.56.E+07         | 2.13.E+07            | 1.97.E+07            | 1.54.E+07            | 1.14.E+07            | 1.78.E+07            | 1.80.E+07            | 1.59.E+07            | 2.03.E+07            |
| 2091 | Q5JRK3    | Presenquence protease, mitochondrial [OS=Homo sapiens]                               | 9.321         | 2.41.E+07         | 4.05.E+06         | 4.04.E+06         | 2.30.E+07         | 2.50.E+07            | 8.92.E+06            | 4.63.E+06            | 1.79.E+07            | 2.34.E+07            | 8.60.E+06            | 1.76.E+07            | 4.76.E+06            |
| 2092 | Q8TCT8    | Signal peptide peptidase-like 2A [OS=Homo sapiens]                                   | 9.317         | 1.01.E+08         | 1.07.E+08         | 9.86.E+07         | 1.08.E+08         | 8.78.E+07            | 8.56.E+07            | 9.18.E+07            | 9.15.E+07            | 1.06.E+08            | 9.60.E+07            | 9.85.E+07            | 1.03.E+08            |
| 2093 | Q9NXF1    | Testis-expressed protein 10 [OS=Homo sapiens]                                        | 9.316         | 6.47.E+06         | 6.23.E+06         | 3.70.E+06         | 6.66.E+06         | 6.57.E+06            | 6.10.E+06            | 6.12.E+06            | 4.15.E+06            | 5.84.E+06            | 5.43.E+06            | 2.80.E+06            | 1.67.E+06            |
| 2094 | Q9NVF2    | Histone chaperone ASF1B [OS=Homo sapiens]                                            | 9.314         | 1.30.E+07         | 1.26.E+07         | 7.81.E+06         | 1.05.E+07         | 6.86.E+06            | 7.96.E+06            | 6.42.E+06            | 4.19.E+06            | 9.45.E+06            | 9.27.E+06            | 7.56.E+06            | 1.25.E+07            |
| 2095 | Q9BV38    | WD repeat-containing protein 18 [OS=Homo sapiens]                                    | 9.281         |                   |                   |                   |                   |                      |                      |                      |                      |                      |                      |                      |                      |
| 2096 | Q5XKP0    | MICOS complex subunit MIC13 [OS=Homo sapiens]                                        | 9.249         | 1.20.E+07         | 2.08.E+07         | 5.88.E+06         | 1.97.E+07         | 1.02.E+07            | 1.33.E+07            | 1.34.E+07            | 1.54.E+07            | 6.91.E+06            | 2.19.E+06            | 1.46.E+07            | 1.65.E+07            |
| 2097 | Q71RC2    | La-related protein 4 [OS=Homo sapiens]                                               | 9.243         | 2.08.E+07         | 1.42.E+07         | 1.44.E+07         | 1.72.E+07         | 1.48.E+07            | 2.35.E+07            | 8.60.E+06            | 2.08.E+07            | 8.00.E+06            | 1.43.E+07            | 1.43.E+07            | 7.28.E+06            |
| 2098 | Q8WZA0    | Protein LZIC [OS=Homo sapiens]                                                       | 9.24          | 2.02.E+07         | 1.84.E+07         | 1.84.E+07         | 1.10.E+07         | 1.83.E+07            | 2.18.E+07            | 1.48.E+07            | 1.03.E+07            | 1.82.E+07            | 1.79.E+07            | 8.16.E+06            | 2.36.E+07            |
| 2099 | Q14558    | Phosphoribosyl pyrophosphate synthase-associated protein 1 [OS=Homo sapiens]         | 9.236         |                   |                   |                   |                   |                      |                      |                      |                      |                      |                      |                      |                      |
| 2100 | Q9NWU5    | 39S ribosomal protein L22, mitochondrial [OS=Homo sapiens]                           | 9.224         | 2.00.E+06         | 1.83.E+06         | 2.22.E+06         | 2.41.E+06         | 3.12.E+06            | 2.87.E+06            | 2.99.E+06            | 2.80.E+06            | 2.16.E+06            | 1.89.E+06            | 1.91.E+06            | 9.10.E+06            |
| 2101 | P13674-1  | prolyl 4-hydroxylase subunit alpha-1 [OS=Homo sapiens]                               | 9.196         | 1.03.E+07         | 6.43.E+06         | 1.55.E+07         | 1.36.E+07         | 1.07.E+07            | 1.40.E+07            | 1.35.E+07            | 1.37.E+07            | 1.19.E+07            | 1.67.E+07            | 1.40.E+07            | 1.48.E+07            |
| 2102 | Q9H008-1  | Phosphorylase phosphohistidine inorganic pyrophosphate phosphatase [OS=Homo sapiens] | 9.166         | 1.40.E+07         | 9.43.E+06         | 1.07.E+07         | 1.10.E+07         | 6.52.E+06            | 6.87.E+06            | 7.61.E+06            | 7.14.E+06            | 1.10.E+07            | 1.14.E+07            | 1.15.E+07            | 1.31.E+07            |
| 2103 | Q9BZE1    | 39S ribosomal protein L37, mitochondrial [OS=Homo sapiens]                           | 9.164         | 1.60.E+07         | 9.59.E+06         | 9.61.E+06         | 9.90.E+06         | 7.36.E+06            | 5.74.E+06            | 3.24.E+06            | 1.48.E+07            | 1.12.E+07            | 1.12.E+07            | 9.08.E+06            |                      |
| 2104 | Q9NQZ2    | Something about silencing protein 10 [OS=Homo sapiens]                               | 9.156         |                   | 2.07.E+07         | 1.87.E+07         | 1.15.E+07         | 2.17.E+07            | 1.56.E+07            | 1.11.E+07            | 1.30.E+07            | 1.27.E+07            | 1.29.E+07            | 1.28.E+07            | 2.18.E+07            |
| 2105 | O43752    | Syntaxin-6 [OS=Homo sapiens]                                                         | 9.149         | 7.92.E+06         | 6.73.E+06         | 6.68.E+06         | 5.26.E+06         | 5.90.E+06            | 6.07.E+06            | 4.92.E+06            | 6.61.E+06            | 1.98.E+06            | 5.00.E+06            |                      |                      |
| 2106 | Q92783    | signal transducing adapter molecule 1 [OS=Homo sapiens]                              | 9.142         | 7.14.E+07         | 7.22.E+07         | 6.66.E+07         | 6.55.E+07         | 7.58.E+07            | 7.80.E+07            | 7.41.E+07            | 7.75.E+07            | 8.07.E+07            | 7.95.E+07            | 8.60.E+07            | 8.01.E+07            |
| 2107 | P09497-1  | clathrin light chain B [OS=Homo sapiens]                                             | 9.126         | 7.06.E+07         | 7.19.E+07         | 7.52.E+07         | 7.92.E+07         | 9.17.E+07            | 9.93.E+07            | 9.43.E+07            | 1.00.E+08            | 6.36.E+07            | 7.09.E+07            | 7.12.E+07            | 7.12.E+07            |
| 2108 | Q15428    | splicing factor 3a subunit 2 [OS=Homo sapiens]                                       | 9.11          | 1.29.E+07         | 1.22.E+07         | 9.63.E+06         | 1.32.E+07         | 1.78.E+07            | 1.71.E+07            | 1.74.E+07            | 1.60.E+07            | 1.56.E+07            | 1.52.E+07            | 1.43.E+07            | 1.49.E+07            |
| 2109 | Q53FV1    | ORM1-like protein 2 [OS=Homo sapiens]                                                | 9.11          |                   |                   |                   |                   |                      |                      |                      |                      |                      |                      |                      |                      |
| 2110 | P26358-1  | DNA (cytosine-5)-methyltransferase 1 [OS=Homo sapiens]                               | 9.085         | 8.48.E+06         |                   | 1.97.E+06         |                   |                      |                      |                      |                      | 1.50.E+07            |                      |                      |                      |
| 2111 | P02768-1  | Serum albumin [OS=Homo sapiens]                                                      | 9.067         | 2.25.E+08         | 2.39.E+08         | 2.20.E+08         | 2.19.E+08         | 1.13.E+08            | 1.15.E+08            | 1.32.E+08            | 1.22.E+08            | 2.00.E+08            | 1.56.E+08            | 1.68.E+08            | 1.65.E+08            |
| 2112 | Q726K5    | Arpin [OS=Homo sapiens]                                                              | 9.01          | 1.51.E+07         | 1.05.E+07         | 1.06.E+07         | 8.73.E+06         | 1.25.E+07            | 1.25.E+07            | 1.32.E+07            | 7.57.E+06            | 1.09.E+07            | 8.02.E+06            | 9.86.E+06            |                      |
| 2113 | O60925    | prefoldin subunit 1 [OS=Homo sapiens]                                                | 8.998         | 7.59.E+07         | 7.92.E+07         | 7.69.E+07         | 7.12.E+07         | 6.76.E+07            | 6.91.E+07            | 7.39.E+07            | 7.21.E+07            | 7.04.E+07            | 8.21.E+07            | 8.11.E+07            | 7.24.E+07            |
| 2114 | P56182    | Ribosomal RNA processing protein 1 homolog A [OS=Homo sapiens]                       | 8.979         | 3.91.E+07         | 3.89.E+07         | 4.58.E+07         | 4.30.E+07         | 3.20.E+07            | 3.62.E+07            | 3.26.E+07            | 4.09.E+07            | 3.63.E+07            | 4.62.E+07            | 4.87.E+07            | 4.56.E+07            |
| 2115 | Q9Y314    | nitric oxide synthase-interacting protein [OS=Homo sapiens]                          | 8.964         | 4.34.E+07         | 3.54.E+07         | 3.37.E+07         | 3.62.E+07         | 4.96.E+07            | 4.94.E+07            | 4.04.E+07            | 3.39.E+07            | 4.06.E+07            | 3.97.E+07            | 2.76.E+07            | 2.73.E+07            |
| 2116 | Q86X83    | COMM domain-containing protein 2 [OS=Homo sapiens]                                   | 8.948         | 2.50.E+07         | 1.76.E+07         | 2.02.E+07         | 1.26.E+07         | 2.06.E+07            | 2.17.E+07            | 2.01.E+07            | 2.43.E+07            | 2.46.E+07            | 2.07.E+07            | 1.99.E+07            | 2.09.E+07            |
| 2117 | Q6UXN9    | WD repeat-containing protein B2 [OS=Homo sapiens]                                    | 8.945         | 1.23.E+07         | 1.36.E+07         |                   |                   | 1.33.E+07            | 1.47.E+07            |                      |                      |                      |                      |                      |                      |
| 2118 | P57081-1  | tRNA (guanine-N(7)-)-methyltransferase non-catalytic subunit WDR4 [OS=Homo sapiens]  | 8.884         |                   |                   |                   |                   |                      |                      |                      |                      |                      |                      |                      |                      |
| 2119 | Q7L2J0-1  | 7SK snRNA methylphosphate capping enzyme [OS=Homo sapiens]                           | 8.882         |                   | 9.48.E+06         | 1.07.E+07         | 5.29.E+06         | 1.31.E+07            | 8.10.E+06            | 5.18.E+06            | 9.21.E+06            | 1.21.E+07            | 7.85.E+06            | 1.23.E+07            |                      |
| 2120 | Q5QJE6    | Deoxyribonucleotidyltransferase terminal-interacting protein 2 [OS=Homo sapiens]     | 8.868         | 1.60.E+08         | 1.36.E+08         | 7.11.E+07         | 1.34.E+08         | 1.61.E+08            | 1.35.E+08            | 1.15.E+08            | 8.64.E+07            | 1.29.E+08            | 8.56.E+07            | 6.48.E+07            | 5.09.E+07            |

| No.  | Accession | Description                                                                                   | Sum PEP Score | CTRL Abundances_1 | CTRL Abundances_2 | CTRL Abundances_3 | CTRL Abundances_4 | CLDN6-1 Abundances_1 | CLDN6-1 Abundances_2 | CLDN6-1 Abundances_3 | CLDN6-1 Abundances_4 | CLDN6-2 Abundances_1 | CLDN6-2 Abundances_2 | CLDN6-2 Abundances_3 | CLDN6-2 Abundances_4 |
|------|-----------|-----------------------------------------------------------------------------------------------|---------------|-------------------|-------------------|-------------------|-------------------|----------------------|----------------------|----------------------|----------------------|----------------------|----------------------|----------------------|----------------------|
| 2121 | Q15819    | Ubiquitin-conjugating enzyme E2 variant 2 [OS=Homo sapiens]                                   | 8.845         | 1.53.E+07         | 1.71.E+07         | 1.79.E+07         | 1.88.E+07         | 1.28.E+07            | 1.39.E+07            | 1.26.E+07            | 1.22.E+07            | 1.35.E+07            | 1.40.E+07            | 1.64.E+07            | 1.68.E+07            |
| 2122 | O15400    | Syntaxin-7 [OS=Homo sapiens]                                                                  | 8.84          | 1.59.E+07         | 1.74.E+07         | 1.48.E+07         | 1.30.E+07         | 8.82.E+06            | 7.47.E+06            | 6.81.E+06            | 6.43.E+06            | 3.28.E+06            |                      |                      | 3.91.E+06            |
| 2123 | Q9NRW7    | Vacuolar protein sorting-associated protein 45 [OS=Homo sapiens]                              | 8.793         | 1.49.E+07         | 1.87.E+07         | 7.17.E+06         | 1.52.E+07         | 2.23.E+07            | 2.05.E+07            | 1.40.E+07            | 1.49.E+07            | 2.00.E+07            | 1.42.E+07            | 1.16.E+07            | 1.93.E+07            |
| 2124 | O75832    | 26S proteasome non-ATPase regulatory subunit 10 [OS=Homo sapiens]                             | 8.768         | 4.52.E+07         | 4.50.E+07         | 4.75.E+07         | 3.84.E+07         | 4.17.E+07            | 4.15.E+07            | 4.17.E+07            | 3.94.E+07            | 5.52.E+07            | 5.33.E+07            | 5.15.E+07            | 5.47.E+07            |
| 2125 | O95861-1  | 3'(2'),5'-bisphosphate nucleotidase 1 [OS=Homo sapiens]                                       | 8.766         | 1.34.E+06         | 3.40.E+06         | 1.39.E+06         | 3.26.E+06         |                      |                      | 9.62.E+05            |                      | 4.34.E+06            |                      |                      | 8.50.E+05            |
| 2126 | O00411    | DNA-directed RNA polymerase, mitochondrial [OS=Homo sapiens]                                  | 8.758         | 1.10.E+07         | 9.32.E+06         | 9.42.E+06         | 9.06.E+06         | 1.01.E+07            | 9.57.E+06            | 9.60.E+06            | 8.53.E+06            | 6.30.E+06            | 7.06.E+06            | 5.77.E+06            | 5.64.E+06            |
| 2127 | O43172-1  | U4/U6 small nuclear ribonucleoprotein Prp4 [OS=Homo sapiens]                                  | 8.754         | 2.05.E+07         | 2.40.E+07         | 2.46.E+07         | 2.63.E+07         | 2.12.E+07            | 2.02.E+07            | 1.93.E+07            | 1.88.E+07            | 2.04.E+07            | 1.82.E+07            | 1.87.E+07            | 2.45.E+07            |
| 2128 | P50851-1  | Lipopolysaccharide-responsive and beige-like anchor protein [OS=Homo sapiens]                 | 8.75          | 1.77.E+07         | 1.84.E+07         | 1.88.E+07         | 2.06.E+07         | 1.94.E+07            | 1.88.E+07            | 1.80.E+07            | 2.00.E+07            | 1.69.E+07            | 2.18.E+07            | 2.28.E+07            | 1.99.E+07            |
| 2129 | Q9H5V8-1  | CUB domain-containing protein 1 [OS=Homo sapiens]                                             | 8.746         | 1.12.E+07         | 1.19.E+07         | 1.47.E+07         | 1.14.E+07         | 1.07.E+07            | 1.30.E+07            | 1.06.E+07            | 1.21.E+07            | 1.25.E+07            | 1.59.E+07            | 1.70.E+07            | 1.54.E+07            |
| 2130 | P30405    | Peptidyl-prolyl cis-trans isomerase F, mitochondrial [OS=Homo sapiens]                        | 8.744         | 1.17.E+08         | 1.28.E+08         | 1.18.E+08         | 1.22.E+08         | 4.15.E+08            | 1.73.E+08            | 1.64.E+08            | 1.66.E+08            | 1.96.E+08            | 1.72.E+08            | 1.91.E+08            | 1.85.E+08            |
| 2131 | Q9P210    | Cleavage and polyadenylation specificity factor subunit 2 [OS=Homo sapiens]                   | 8.737         |                   |                   |                   |                   |                      |                      |                      |                      |                      |                      |                      |                      |
| 2132 | P37198    | nuclear pore glycoprotein p62 [OS=Homo sapiens]                                               | 8.736         | 8.83.E+06         | 1.01.E+07         | 1.02.E+07         | 1.22.E+07         | 1.00.E+07            | 1.07.E+07            | 1.31.E+07            | 1.21.E+07            | 9.06.E+06            | 1.18.E+07            | 1.06.E+07            | 9.87.E+06            |
| 2133 | Q8NCG7    | Sn1-specific diacylglycerol lipase beta [OS=Homo sapiens]                                     | 8.719         | 5.36.E+06         | 4.35.E+06         | 3.41.E+06         | 4.45.E+06         | 5.85.E+06            | 5.80.E+06            | 6.66.E+06            | 6.57.E+06            | 5.66.E+06            | 8.45.E+06            | 6.14.E+06            | 7.26.E+06            |
| 2134 | Q9BZH6    | WD repeat-containing protein 11 [OS=Homo sapiens]                                             | 8.708         | 5.48.E+06         | 3.68.E+06         | 4.91.E+06         | 5.04.E+06         | 5.51.E+06            | 6.46.E+06            | 5.87.E+06            | 4.66.E+06            | 4.69.E+06            | 4.68.E+06            | 5.09.E+06            | 5.24.E+06            |
| 2135 | Q969X6    | U3 small nucleolar RNA-associated protein 4 homolog [OS=Homo sapiens]                         | 8.707         | 8.11.E+06         | 6.33.E+06         | 6.86.E+06         | 1.05.E+07         | 7.11.E+06            | 7.76.E+06            | 7.38.E+06            | 7.82.E+06            | 8.95.E+06            | 7.49.E+06            | 5.88.E+06            | 6.94.E+06            |
| 2136 | P35249    | replication factor C subunit 4 [OS=Homo sapiens]                                              | 8.676         | 4.61.E+07         | 4.90.E+07         | 5.04.E+07         | 5.75.E+07         | 8.42.E+06            | 3.06.E+07            | 1.21.E+07            | 5.76.E+06            | 2.11.E+07            | 1.83.E+07            | 4.90.E+07            | 4.72.E+07            |
| 2137 | Q96B26    | Exosome complex component RRP43 [OS=Homo sapiens]                                             | 8.656         | 1.41.E+07         |                   | 1.03.E+07         | 1.37.E+07         |                      | 1.51.E+07            | 1.39.E+07            | 4.21.E+06            | 2.42.E+07            | 7.90.E+06            | 2.22.E+07            |                      |
| 2138 | O43159    | ribosomal rna-processing protein 8 [OS=Homo sapiens]                                          | 8.651         | 3.95.E+06         | 4.92.E+06         | 4.87.E+06         | 5.47.E+06         | 4.49.E+06            | 4.50.E+06            | 3.91.E+06            | 5.32.E+06            | 5.05.E+06            | 4.97.E+06            | 5.29.E+06            | 4.89.E+06            |
| 2139 | Q9NXG6    | Transmembrane prolyl 4-hydroxylase [OS=Homo sapiens]                                          | 8.621         | 4.00.E+06         | 3.73.E+06         | 4.77.E+06         | 4.81.E+06         | 5.03.E+06            | 5.51.E+06            | 5.34.E+06            | 3.17.E+06            | 5.05.E+06            | 2.84.E+06            | 3.15.E+06            | 2.84.E+06            |
| 2140 | P78406    | mRNA export factor [OS=Homo sapiens]                                                          | 8.619         | 6.86.E+07         | 7.19.E+07         | 6.40.E+07         | 6.43.E+07         | 7.95.E+07            | 7.08.E+07            | 6.03.E+07            | 6.70.E+07            | 7.40.E+07            | 7.18.E+07            | 6.97.E+07            | 7.49.E+07            |
| 2141 | O43395    | U4/U6 small nuclear ribonucleoprotein Prp3 [OS=Homo sapiens]                                  | 8.614         | 2.19.E+07         | 3.48.E+07         | 2.78.E+07         | 2.69.E+07         | 2.97.E+07            | 3.00.E+07            | 3.00.E+07            | 2.76.E+07            | 2.30.E+07            | 2.79.E+07            | 2.85.E+07            | 4.01.E+07            |
| 2142 | P17096-2  | Isoform HMG-Y of High mobility group protein HMG-I/HMG-Y [OS=Homo sapiens]                    | 8.598         | 4.80.E+07         | 4.76.E+07         | 4.61.E+07         | 5.47.E+07         | 6.81.E+07            | 7.01.E+07            | 7.00.E+07            | 6.59.E+07            | 5.39.E+07            | 5.84.E+07            | 5.29.E+07            | 5.33.E+07            |
| 2143 | Q9NP92    | 39S ribosomal protein S30, mitochondrial [OS=Homo sapiens]                                    | 8.524         | 3.06.E+07         | 2.70.E+07         | 2.60.E+07         | 2.19.E+07         | 3.03.E+07            | 2.59.E+07            | 2.57.E+07            | 2.29.E+07            | 3.80.E+07            | 3.05.E+07            | 2.64.E+07            | 2.66.E+07            |
| 2144 | Q99496    | E3 ubiquitin-protein ligase RING2 [OS=Homo sapiens]                                           | 8.497         | 1.17.E+07         | 1.33.E+07         | 1.49.E+07         | 1.86.E+07         | 1.32.E+07            | 1.61.E+07            | 1.53.E+07            | 1.48.E+07            | 1.38.E+07            | 1.38.E+07            | 1.34.E+07            | 1.40.E+07            |
| 2145 | Q969T9    | VW domain-binding protein 2 [OS=Homo sapiens]                                                 | 8.492         | 1.62.E+07         | 2.31.E+07         | 1.92.E+07         | 3.73.E+06         | 2.04.E+07            | 1.75.E+07            | 2.22.E+07            | 2.46.E+07            | 1.57.E+07            | 1.79.E+07            | 1.84.E+07            | 1.58.E+07            |
| 2146 | Q9NRN7    | L-aminoacidate-semialdehyde dehydrogenase-phosphopantetheinyl transferase [OS=Homo sapiens]   | 8.487         | 4.18.E+07         | 4.25.E+07         | 4.24.E+07         | 3.72.E+07         | 3.68.E+07            | 4.58.E+07            | 3.16.E+07            | 3.03.E+07            | 4.04.E+07            | 3.47.E+07            | 3.26.E+07            | 4.34.E+07            |
| 2147 | P49761    | Dual specificity protein kinase CLK3 [OS=Homo sapiens]                                        | 8.483         | 1.05.E+07         | 7.50.E+06         | 8.79.E+06         | 9.36.E+06         | 8.48.E+06            | 8.62.E+06            | 8.71.E+06            | 8.36.E+06            | 5.68.E+06            | 5.89.E+06            | 4.95.E+06            | 6.92.E+06            |
| 2148 | Q96B49    | Mitochondrial import receptor subunit TOM6 homolog OS=Homo sapiens OX=9606 GN=TOMM6 PE=1 SV=1 | 8.464         | 1.54.E+07         | 1.12.E+07         | 1.27.E+07         | 1.89.E+07         | 1.37.E+07            | 1.29.E+07            | 8.39.E+06            | 1.59.E+07            | 7.63.E+06            | 9.58.E+06            | 8.79.E+06            | 1.28.E+07            |
| 2149 | Q9UBR2    | Cathepsin Z [OS=Homo sapiens]                                                                 | 8.452         | 3.37.E+07         | 2.98.E+07         | 3.50.E+07         | 3.42.E+07         | 3.54.E+07            | 3.97.E+07            | 4.12.E+07            | 4.14.E+07            | 2.43.E+07            | 3.17.E+07            | 3.14.E+07            | 3.08.E+07            |
| 2150 | Q2TAY7    | WD40 repeat-containing protein SMU1 [OS=Homo sapiens]                                         | 8.435         | 7.60.E+07         | 7.76.E+07         | 7.99.E+07         | 7.68.E+07         | 7.89.E+07            | 7.63.E+07            | 8.39.E+07            | 7.59.E+07            | 7.48.E+07            | 7.23.E+07            | 6.16.E+07            | 7.03.E+07            |
| 2151 | P82933    | 28S ribosomal protein S9, mitochondrial [OS=Homo sapiens]                                     | 8.402         | 2.39.E+07         | 2.79.E+07         | 2.89.E+07         | 3.32.E+07         | 2.39.E+07            | 2.33.E+07            | 3.49.E+07            | 1.89.E+07            | 3.71.E+07            | 7.45.E+07            | 1.77.E+07            | 2.99.E+07            |
| 2152 | Q16795    | NADH dehydrogenase [ubiquinone] 1 alpha subcomplex subunit 9, mitochondrial [OS=Homo sapiens] | 8.395         | 2.46.E+07         | 2.78.E+07         | 3.31.E+07         | 3.21.E+07         | 2.62.E+07            | 3.05.E+07            | 3.00.E+07            | 2.18.E+07            | 3.00.E+07            | 3.13.E+07            | 3.24.E+07            | 3.23.E+07            |
| 2153 | Q9NZM5    | ribosome biogenesis protein NOP53 [OS=Homo sapiens]                                           | 8.342         | 1.06.E+07         | 6.70.E+06         | 8.11.E+06         | 7.20.E+06         | 1.18.E+07            | 1.09.E+07            | 6.97.E+06            | 6.04.E+06            | 8.00.E+06            | 3.89.E+06            | 3.50.E+06            | 3.09.E+06            |
| 2154 | Q99622    | Protein C10 [OS=Homo sapiens]                                                                 | 8.34          | 2.66.E+07         | 2.07.E+07         | 2.85.E+07         | 1.81.E+07         | 1.48.E+07            | 1.65.E+07            | 1.34.E+07            | 1.48.E+07            | 1.56.E+07            | 1.24.E+07            | 1.43.E+07            | 1.32.E+07            |
| 2155 | O94776    | Metastasis-associated protein MTA2 [OS=Homo sapiens]                                          | 8.339         | 3.57.E+07         | 3.80.E+07         | 3.68.E+07         | 3.91.E+07         | 4.85.E+07            | 4.71.E+07            | 4.66.E+07            | 4.28.E+07            | 4.08.E+07            | 4.15.E+07            | 3.99.E+07            | 3.96.E+07            |
| 2156 | Q13418    | Integrin-linked protein kinase [OS=Homo sapiens]                                              | 8.338         | 1.18.E+07         | 1.13.E+07         | 8.59.E+06         | 1.20.E+07         | 1.57.E+07            | 1.32.E+07            | 1.43.E+07            | 1.02.E+07            | 1.14.E+07            | 1.13.E+07            | 8.59.E+06            | 8.06.E+06            |
| 2157 | Q9P289    | serine/threonine-protein kinase 26 [OS=Homo sapiens]                                          | 8.33          | 2.05.E+08         | 2.05.E+08         | 2.04.E+08         | 2.09.E+08         | 2.14.E+08            | 2.07.E+08            | 2.08.E+08            | 2.12.E+08            | 2.22.E+08            | 2.02.E+08            | 2.29.E+08            | 2.30.E+08            |
| 2158 | Q8TF42    | ubiquitin-associated and SH3 domain-containing protein B [OS=Homo sapiens]                    | 8.322         | 8.61.E+06         | 6.55.E+06         | 6.84.E+06         | 3.97.E+06         | 1.71.E+07            | 1.91.E+07            | 2.09.E+07            | 1.58.E+07            | 7.40.E+06            | 3.28.E+06            | 7.10.E+06            | 8.55.E+06            |
| 2159 | Q15041    | ADP-ribosylation factor-like protein 6-interacting protein 1 [OS=Homo sapiens]                | 8.286         | 8.67.E+07         | 8.62.E+07         | 9.79.E+07         | 9.68.E+07         | 8.20.E+07            | 8.92.E+07            | 8.30.E+07            | 9.09.E+07            | 9.49.E+07            | 1.09.E+08            | 1.07.E+08            | 1.09.E+08            |
| 2160 | P11279    | Lysosome-associated membrane glycoprotein 1 [OS=Homo sapiens]                                 | 8.261         | 8.66.E+07         | 1.18.E+08         | 1.02.E+08         | 1.14.E+08         | 1.19.E+08            | 1.15.E+08            | 1.17.E+08            | 1.29.E+08            | 8.48.E+07            | 1.06.E+08            | 1.04.E+08            | 1.01.E+08            |
| 2161 | Q9NWU2    | Glucose-induced degradation protein 8 homolog [OS=Homo sapiens]                               | 8.245         |                   |                   |                   |                   | 1.92.E+07            | 2.03.E+07            | 1.75.E+07            | 1.46.E+07            | 1.59.E+07            | 1.73.E+07            | 1.54.E+07            | 1.74.E+07            |
| 2162 | Q9P253    | Vacuolar protein sorting-associated protein 18 homolog [OS=Homo sapiens]                      | 8.243         | 1.03.E+07         | 8.43.E+06         | 6.81.E+06         | 8.77.E+06         | 9.40.E+06            | 6.98.E+06            | 8.25.E+06            | 8.89.E+06            | 8.85.E+06            | 6.87.E+06            | 7.98.E+06            | 9.12.E+06            |
| 2163 | Q9Y3B7-1  | 39S ribosomal protein L11, mitochondrial [OS=Homo sapiens]                                    | 8.232         | 4.73.E+07         | 4.75.E+07         | 5.51.E+07         | 5.41.E+07         | 4.41.E+07            | 6.06.E+07            | 5.70.E+07            | 6.17.E+07            | 4.31.E+07            | 5.01.E+07            | 5.16.E+07            | 5.24.E+07            |
| 2164 | Q9NPE3    | H/ACA ribonucleoprotein complex subunit 3 [OS=Homo sapiens]                                   | 8.215         | 1.00.E+07         | 9.51.E+06         | 8.40.E+06         | 9.00.E+06         | 9.82.E+06            | 7.71.E+06            | 6.96.E+06            | 7.05.E+06            | 9.80.E+06            | 7.60.E+06            | 9.32.E+06            | 8.07.E+06            |
| 2165 | Q14318    | peptidyl-prolyl cis-trans isomerase FKBP8 [OS=Homo sapiens]                                   | 8.206         |                   |                   |                   |                   |                      |                      |                      |                      |                      |                      |                      |                      |
| 2166 | Q9UBN7-1  | histone deacetylase 6 [OS=Homo sapiens]                                                       | 8.186         | 3.94.E+06         |                   |                   |                   |                      |                      |                      |                      | 4.88.E+06            |                      |                      |                      |
| 2167 | P57105    | Synaptotagmin-2-binding protein [OS=Homo sapiens]                                             | 8.168         | 2.68.E+07         | 3.19.E+07         | 2.85.E+07         | 2.82.E+07         | 2.83.E+07            | 3.01.E+07            | 2.89.E+07            | 2.85.E+07            | 3.38.E+07            | 2.90.E+07            | 2.84.E+07            | 3.01.E+07            |
| 2168 | Q8TEM1-1  | Nuclear pore membrane glycoprotein 210 [OS=Homo sapiens]                                      | 8.162         | 4.87.E+06         | 7.36.E+06         | 1.82.E+06         | 3.76.E+06         | 2.94.E+06            | 6.96.E+06            |                      | 2.75.E+06            | 4.79.E+06            | 4.06.E+06            | 2.45.E+06            | 2.41.E+06            |
| 2169 | Q96EE3    | nucleoporin Seh1 [OS=Homo sapiens]                                                            | 8.151         | 1.52.E+08         | 4.55.E+07         | 1.49.E+08         | 1.43.E+07         | 1.39.E+08            | 1.41.E+08            | 6.94.E+07            | 6.65.E+07            | 8.03.E+07            | 8.05.E+07            | 7.93.E+07            | 8.56.E+07            |
| 2170 | Q5T310    | G patch domain-containing protein 4 [OS=Homo sapiens]                                         | 8.132         | 1.80.E+07         | 2.20.E+07         | 1.89.E+07         | 1.32.E+07         | 1.04.E+07            | 1.41.E+07            | 1.32.E+07            | 1.09.E+07            | 1.67.E+07            | 1.30.E+07            | 2.05.E+07            | 2.23.E+07            |

Supplemental Data 1. List of identified proteins

| No.  | Accession | Description                                                                                                     | Sum PEP Score | CTRL Abundances_1 | CTRL Abundances_2 | CTRL Abundances_3 | CTRL Abundances_4 | CLDN6-1 Abundances_1 | CLDN6-1 Abundances_2 | CLDN6-1 Abundances_3 | CLDN6-1 Abundances_4 | CLDN6-2 Abundances_1 | CLDN6-2 Abundances_2 | CLDN6-2 Abundances_3 | CLDN6-2 Abundances_4 |
|------|-----------|-----------------------------------------------------------------------------------------------------------------|---------------|-------------------|-------------------|-------------------|-------------------|----------------------|----------------------|----------------------|----------------------|----------------------|----------------------|----------------------|----------------------|
| 2171 | P60468    | protein transport protein Sec61 subunit beta [OS=Homo sapiens]                                                  | 8.116         | 3.41.E+07         | 3.28.E+07         | 2.99.E+07         | 3.28.E+07         | 3.57.E+07            | 3.62.E+07            | 3.26.E+07            | 3.25.E+07            | 3.31.E+07            | 3.33.E+07            | 3.35.E+07            | 3.00.E+07            |
| 2172 | Q92878    | DNA repair protein Rad50 [OS=Homo sapiens]                                                                      | 8.087         | 7.47.E+06         | 6.53.E+06         |                   | 9.02.E+06         |                      |                      | 2.86.E+06            |                      | 1.35.E+07            |                      | 4.83.E+06            | 4.61.E+06            |
| 2173 | Q6YN16    | Hydroxysteroid dehydrogenase-like protein 2 [OS=Homo sapiens]                                                   | 8.081         | 5.22.E+07         | 6.47.E+07         | 5.87.E+07         | 5.18.E+07         | 5.57.E+07            | 5.71.E+07            | 5.48.E+07            | 5.38.E+07            | 6.53.E+07            | 6.78.E+07            | 6.66.E+07            | 6.53.E+07            |
| 2174 | P11717    | Cation-independent mannose-6-phosphate receptor [OS=Homo sapiens]                                               | 8.068         | 7.51.E+06         | 7.97.E+06         | 8.17.E+06         | 8.25.E+06         | 4.34.E+06            | 5.52.E+06            | 3.91.E+06            | 5.54.E+06            | 9.33.E+06            | 1.12.E+07            | 1.80.E+07            | 1.77.E+07            |
| 2175 | Q9Y371    | Endophilin-B1 [OS=Homo sapiens]                                                                                 | 8.054         | 9.68.E+06         | 1.02.E+07         | 1.20.E+07         | 9.58.E+06         | 1.52.E+07            | 1.37.E+07            | 1.61.E+07            | 1.69.E+07            | 1.32.E+07            | 1.70.E+07            | 1.61.E+07            | 1.53.E+07            |
| 2176 | P54619-1  | 5'-AMP-activated protein kinase subunit gamma-1 [OS=Homo sapiens]                                               | 8.032         |                   |                   |                   |                   |                      |                      |                      |                      |                      |                      |                      |                      |
| 2177 | P61964    | WD repeat-containing protein 5 [OS=Homo sapiens]                                                                | 8.022         | 3.10.E+07         | 3.11.E+07         | 3.09.E+07         | 3.30.E+07         | 2.51.E+07            | 2.67.E+07            | 2.25.E+07            | 2.66.E+07            | 2.75.E+07            | 2.84.E+07            | 3.07.E+07            | 3.10.E+07            |
| 2178 | Q9Y399    | 28S ribosomal protein S2, mitochondrial [OS=Homo sapiens]                                                       | 7.995         |                   |                   |                   |                   |                      |                      |                      |                      | 3.53.E+05            | 8.30.E+05            |                      |                      |
| 2179 | P46063    | ATP-dependent DNA helicase Q1 [OS=Homo sapiens]                                                                 | 7.979         | 1.26.E+07         | 1.52.E+07         | 1.52.E+07         | 1.35.E+07         | 1.57.E+07            | 1.43.E+07            | 1.50.E+07            | 1.62.E+07            | 1.38.E+07            | 1.78.E+07            | 1.38.E+07            | 1.44.E+07            |
| 2180 | Q13526    | peptidyl-prolyl cis-trans isomerase NIMA-interacting 1 [OS=Homo sapiens]                                        | 7.973         | 1.71.E+07         | 1.77.E+07         | 1.55.E+07         | 1.92.E+07         | 1.61.E+07            | 1.46.E+07            | 1.61.E+07            | 1.19.E+07            | 1.52.E+07            | 1.54.E+07            | 1.40.E+07            | 1.48.E+07            |
| 2181 | P18887    | DNA repair protein XRCC1 [OS=Homo sapiens]                                                                      | 7.961         | 1.91.E+07         | 3.55.E+07         | 8.51.E+06         | 2.78.E+07         | 8.41.E+06            | 2.78.E+07            | 2.81.E+07            | 2.90.E+07            | 6.12.E+06            | 2.31.E+07            | 5.44.E+06            | 2.23.E+07            |
| 2182 | Q12824-1  | SWI/SNF-related matrix-associated actin-dependent regulator of chromatin subfamily B member 1 [OS=Homo sapiens] | 7.948         | 1.18.E+07         | 1.24.E+07         | 1.11.E+07         | 1.16.E+07         | 9.29.E+06            | 1.11.E+07            | 1.12.E+07            | 1.15.E+07            | 8.73.E+06            | 1.05.E+07            | 8.16.E+06            | 1.47.E+07            |
| 2183 | Q6YP21    | Kynurenine--oxoglutarate transaminase 3 [OS=Homo sapiens]                                                       | 7.922         | 2.29.E+07         | 2.47.E+07         | 2.11.E+07         |                   | 1.58.E+07            | 1.71.E+07            | 1.50.E+07            | 1.56.E+07            | 2.29.E+07            | 2.17.E+07            | 2.14.E+07            | 2.23.E+07            |
| 2184 | Q15363    | Transmembrane emp24 domain-containing protein 2 [OS=Homo sapiens]                                               | 7.906         | 2.85.E+07         | 1.69.E+07         | 2.84.E+07         | 2.59.E+07         | 3.66.E+07            | 3.67.E+07            | 3.58.E+07            | 3.30.E+07            | 2.05.E+07            | 2.93.E+07            | 3.20.E+07            | 1.76.E+07            |
| 2185 | Q96QD8    | sodium-coupled neutral amino acid transporter 2 [OS=Homo sapiens]                                               | 7.898         | 1.89.E+07         | 1.96.E+07         | 1.81.E+07         | 1.80.E+07         | 1.99.E+07            | 1.69.E+07            | 1.75.E+07            | 1.99.E+07            | 2.44.E+07            | 2.01.E+07            | 1.94.E+07            |                      |
| 2186 | Q6PD74    | Alpha- and gamma-adaptin-binding protein p34 [OS=Homo sapiens]                                                  | 7.897         | 1.49.E+07         | 7.34.E+06         | 1.02.E+07         | 1.75.E+07         | 1.40.E+07            | 2.02.E+07            | 1.50.E+07            | 1.22.E+07            | 1.62.E+07            | 1.44.E+07            | 1.26.E+07            | 9.72.E+06            |
| 2187 | Q9NZB2-1  | Constitutive coactivator of PPAR-gamma-like protein 1 [OS=Homo sapiens]                                         | 7.88          | 3.97.E+07         | 3.57.E+07         | 3.62.E+07         | 3.16.E+07         | 3.24.E+07            | 5.02.E+07            | 4.78.E+07            | 3.97.E+07            | 4.19.E+07            | 5.35.E+07            | 4.32.E+07            | 5.52.E+07            |
| 2188 | Q95801    | Tetratricopeptide repeat protein 4 [OS=Homo sapiens]                                                            | 7.868         | 1.78.E+07         | 8.79.E+06         | 1.03.E+07         | 5.62.E+06         | 1.02.E+07            | 1.03.E+07            | 1.13.E+07            | 9.35.E+06            | 1.43.E+07            | 6.26.E+06            | 1.05.E+07            | 9.71.E+06            |
| 2189 | Q9BTZ2    | dehydrogenase/reductase complex subunit 1-like protein 1 [OS=Homo sapiens]                                      | 7.858         | 7.34.E+06         | 3.02.E+07         | 3.20.E+07         | 3.70.E+07         | 3.21.E+07            | 8.30.E+06            | 4.04.E+07            | 5.63.E+07            | 3.28.E+07            | 3.46.E+07            | 3.30.E+07            | 3.58.E+07            |
| 2190 | Q9Y4K1    | beta/gamma crystallin domain-containing protein 1 [OS=Homo sapiens]                                             | 7.856         | 3.33.E+07         | 8.37.E+06         | 3.24.E+07         | 4.11.E+07         | 1.07.E+07            | 4.46.E+07            | 2.30.E+07            | 2.47.E+07            | 4.66.E+07            | 3.63.E+07            | 3.64.E+07            | 1.11.E+07            |
| 2191 | Q96B97-1  | SH3 domain-containing kinase-binding protein 1 [OS=Homo sapiens]                                                | 7.853         | 9.24.E+06         | 9.37.E+06         | 9.10.E+06         | 1.11.E+07         | 2.32.E+07            | 2.26.E+07            | 2.16.E+07            | 1.93.E+07            | 1.61.E+07            | 1.50.E+07            | 1.47.E+07            | 1.47.E+07            |
| 2192 | Q9NQT4    | Exosome complex component RRP46 [OS=Homo sapiens]                                                               | 7.852         | 1.57.E+07         | 1.56.E+07         | 1.92.E+07         | 1.96.E+07         |                      | 1.63.E+07            | 1.93.E+07            | 1.93.E+07            | 2.02.E+07            | 1.99.E+07            | 2.01.E+07            | 1.94.E+07            |
| 2193 | Q8N0U8    | Vitamin K epoxide reductase complex subunit 1-like protein 1 [OS=Homo sapiens]                                  | 7.834         | 3.58.E+07         | 2.71.E+07         | 2.74.E+07         | 3.59.E+07         | 2.82.E+07            | 3.48.E+07            | 3.11.E+07            | 2.80.E+07            | 2.80.E+07            | 3.12.E+07            | 2.64.E+07            | 2.43.E+07            |
| 2194 | Q96C01    | Protein FAM136A [OS=Homo sapiens]                                                                               | 7.826         |                   | 1.47.E+07         | 1.61.E+07         | 1.95.E+07         |                      | 6.15.E+06            | 2.07.E+07            | 1.28.E+07            | 1.00.E+07            | 1.17.E+07            | 1.36.E+07            | 1.29.E+07            |
| 2195 | Q9NVS2    | 39S ribosomal protein S18a, mitochondrial [OS=Homo sapiens]                                                     | 7.796         | 1.48.E+07         | 1.85.E+07         | 1.87.E+07         | 1.99.E+07         | 1.75.E+07            | 1.60.E+07            | 1.87.E+07            | 1.73.E+07            | 1.74.E+07            | 1.95.E+07            | 1.77.E+07            | 1.73.E+07            |
| 2196 | Q9NV31    | U3 small nucleolar ribonucleoprotein protein IMP3 [OS=Homo sapiens]                                             | 7.766         | 1.39.E+07         | 9.91.E+06         | 9.80.E+06         | 1.67.E+07         | 1.16.E+07            | 1.35.E+07            | 1.17.E+07            | 8.02.E+06            | 8.51.E+06            | 8.22.E+06            | 9.28.E+06            | 8.50.E+06            |
| 2197 | Q4G0F5    | Vacuolar protein sorting-associated protein 26B [OS=Homo sapiens]                                               | 7.749         | 2.00.E+07         | 2.15.E+07         | 2.73.E+07         | 2.14.E+07         | 2.51.E+07            | 2.76.E+07            | 2.65.E+07            | 2.85.E+07            | 2.34.E+07            | 2.78.E+07            | 3.09.E+07            | 2.40.E+07            |
| 2198 | P14927    | Cytochrome b-c1 complex subunit 7 [OS=Homo sapiens]                                                             | 7.748         | 4.02.E+07         | 5.36.E+07         | 5.14.E+07         | 5.52.E+07         | 4.12.E+07            | 4.08.E+07            | 4.43.E+07            | 3.78.E+07            | 5.70.E+07            | 5.03.E+07            | 4.83.E+07            | 5.20.E+07            |
| 2199 | Q8IWA0    | WD repeat-containing protein 75 [OS=Homo sapiens]                                                               | 7.738         | 3.04.E+07         | 2.47.E+07         | 2.30.E+07         | 2.62.E+07         | 2.26.E+07            | 1.19.E+07            | 2.20.E+07            | 1.97.E+07            | 2.34.E+07            | 2.53.E+07            | 2.28.E+07            | 2.14.E+07            |
| 2200 | Q8N543    | prolyl 3-hydroxylase OGFD1 [OS=Homo sapiens]                                                                    | 7.729         |                   | 1.60.E+07         |                   |                   |                      |                      |                      |                      |                      |                      |                      | 1.71.E+07            |
| 2201 | Q9NVS9    | Pyridoxine-5'-phosphate oxidase [OS=Homo sapiens]                                                               | 7.704         | 1.13.E+07         | 1.04.E+07         | 1.17.E+07         | 1.11.E+07         | 1.46.E+07            | 1.50.E+07            | 1.61.E+07            | 1.59.E+07            | 1.92.E+07            | 1.79.E+07            | 1.83.E+07            | 1.80.E+07            |
| 2202 | Q8NDI1    | EH domain-binding protein 1 [OS=Homo sapiens]                                                                   | 7.696         | 8.34.E+06         | 1.12.E+07         | 1.02.E+07         | 8.14.E+06         | 1.03.E+07            | 8.52.E+06            | 9.56.E+06            | 1.02.E+07            | 1.03.E+07            | 9.62.E+06            | 9.67.E+06            | 1.06.E+07            |
| 2203 | Q15833-1  | Syntaxin-binding protein 2 [OS=Homo sapiens]                                                                    | 7.694         | 7.18.E+06         | 5.48.E+06         | 4.29.E+06         | 4.94.E+06         | 4.72.E+06            | 6.20.E+06            | 6.10.E+06            | 3.98.E+06            | 3.72.E+06            | 2.55.E+06            |                      | 2.98.E+06            |
| 2204 | Q2TAA2    | Isoamyl acetate-hydrolyzing esterase 1 homolog [OS=Homo sapiens]                                                | 7.676         | 4.15.E+05         |                   | 1.16.E+06         |                   | 5.36.E+06            | 4.80.E+06            | 3.91.E+06            | 3.07.E+06            | 4.18.E+06            | 3.07.E+06            | 2.61.E+06            | 1.85.E+06            |
| 2205 | P22570    | NADPH-adrenodoxin oxidoreductase, mitochondrial [OS=Homo sapiens]                                               | 7.673         | 1.66.E+07         | 1.16.E+07         | 1.10.E+07         | 1.71.E+07         | 1.27.E+07            | 1.69.E+07            | 1.55.E+07            | 1.06.E+07            | 9.12.E+06            | 1.15.E+07            | 1.18.E+07            | 1.00.E+07            |
| 2206 | Q9HAV7    | GrpE protein homolog 1, mitochondrial [OS=Homo sapiens]                                                         | 7.668         | 8.51.E+07         | 7.95.E+07         | 9.16.E+07         | 9.11.E+07         | 8.86.E+07            | 8.41.E+07            | 8.43.E+07            | 9.28.E+07            | 7.93.E+07            | 8.82.E+07            | 9.47.E+07            | 9.41.E+07            |
| 2207 | Q95298-1  | NADH dehydrogenase [ubiquinone] 1 subunit C2 [OS=Homo sapiens]                                                  | 7.66          | 1.10.E+07         | 1.18.E+07         | 1.19.E+07         | 1.35.E+07         | 1.36.E+07            | 1.48.E+07            | 1.66.E+07            | 1.71.E+07            | 1.36.E+07            | 1.43.E+07            | 1.55.E+07            | 1.38.E+07            |
| 2208 | O75391    | Sperm-associated antigen 7 [OS=Homo sapiens]                                                                    | 7.629         |                   |                   |                   | 1.89.E+06         |                      |                      | 3.93.E+05            |                      |                      |                      | 3.18.E+05            |                      |
| 2209 | Q8N4V1    | Membrane magnesium transporter 1 [OS=Homo sapiens]                                                              | 7.612         | 1.51.E+07         | 1.44.E+07         | 1.32.E+07         | 1.30.E+07         | 1.28.E+07            | 1.29.E+07            | 1.33.E+07            | 1.52.E+07            | 1.10.E+07            | 1.23.E+07            | 1.55.E+07            | 1.28.E+07            |
| 2210 | Q9BT73    | Proteasome assembly chaperone 3 [OS=Homo sapiens]                                                               | 7.574         |                   |                   |                   |                   |                      |                      |                      |                      |                      |                      |                      |                      |
| 2211 | Q92990    | Glomulin [OS=Homo sapiens]                                                                                      | 7.555         | 1.47.E+07         | 1.42.E+07         | 1.80.E+07         | 2.23.E+07         | 1.11.E+07            | 1.31.E+07            | 1.53.E+07            | 1.24.E+07            | 1.53.E+07            | 1.66.E+07            | 1.74.E+07            | 2.09.E+07            |
| 2212 | Q9NY61    | Protein AATF [OS=Homo sapiens]                                                                                  | 7.554         | 6.06.E+06         | 1.06.E+07         |                   |                   | 1.11.E+07            | 1.15.E+07            |                      |                      |                      |                      |                      |                      |
| 2213 | P00374    | dihydrofolate reductase [OS=Homo sapiens]                                                                       | 7.546         |                   |                   |                   |                   |                      |                      |                      |                      |                      |                      |                      |                      |
| 2214 | Q9HD15    | Steroid receptor RNA activator 1 [OS=Homo sapiens]                                                              | 7.543         |                   |                   |                   |                   |                      |                      |                      |                      |                      |                      |                      |                      |
| 2215 | P23921    | Ribonucleoside-diphosphate reductase large subunit [OS=Homo sapiens]                                            | 7.484         | 1.71.E+07         | 1.72.E+07         | 1.82.E+07         | 1.99.E+07         | 1.53.E+07            | 1.08.E+07            | 1.46.E+07            | 1.10.E+07            | 1.34.E+07            | 1.02.E+07            | 1.51.E+07            | 1.86.E+07            |
| 2216 | P60059    | Protein transport protein Sec61 subunit gamma [OS=Homo sapiens]                                                 | 7.464         | 2.23.E+07         | 1.76.E+07         | 1.49.E+07         | 2.31.E+07         |                      |                      |                      |                      | 1.02.E+07            |                      |                      | 3.77.E+06            |

| No.  | Accession | Description                                                                                                     | Sum PEP Score | CTRL Abundances_1 | CTRL Abundances_2 | CTRL Abundances_3 | CTRL Abundances_4 | CLDN6-1 Abundances_1 | CLDN6-1 Abundances_2 | CLDN6-1 Abundances_3 | CLDN6-1 Abundances_4 | CLDN6-2 Abundances_1 | CLDN6-2 Abundances_2 | CLDN6-2 Abundances_3 | CLDN6-2 Abundances_4 |
|------|-----------|-----------------------------------------------------------------------------------------------------------------|---------------|-------------------|-------------------|-------------------|-------------------|----------------------|----------------------|----------------------|----------------------|----------------------|----------------------|----------------------|----------------------|
| 2217 | Q969G3    | SWI/SNF-related matrix-associated actin-dependent regulator of chromatin subfamily E member 1 [OS=Homo sapiens] | 7.456         |                   |                   |                   |                   |                      |                      |                      |                      |                      |                      |                      |                      |
| 2218 | Q9H9T3    | elongator complex protein 3 [OS=Homo sapiens]                                                                   | 7.42          | 7.86.E+06         | 4.75.E+06         | 5.82.E+06         | 4.69.E+06         | 5.64.E+06            | 5.24.E+06            | 5.62.E+06            | 5.23.E+06            | 4.67.E+06            | 5.21.E+06            | 7.58.E+06            | 6.08.E+06            |
| 2219 | P16278    | Beta-galactosidase [OS=Homo sapiens]                                                                            | 7.398         | 3.87.E+07         | 3.84.E+07         | 6.34.E+07         | 5.69.E+07         | 6.16.E+07            | 6.89.E+07            | 6.42.E+07            | 6.69.E+07            | 5.42.E+07            | 5.79.E+07            | 5.82.E+07            | 5.69.E+07            |
| 2220 | Q9HAB8-1  | phosphopantothenate--cysteine ligase [OS=Homo sapiens]                                                          | 7.385         | 8.25.E+07         | 8.58.E+07         | 8.95.E+07         | 8.57.E+07         | 9.55.E+07            | 8.97.E+07            | 9.18.E+07            | 9.86.E+07            | 8.06.E+07            | 8.49.E+07            | 9.04.E+07            | 8.82.E+07            |
| 2221 | Q8WWC4    | m-AAA protease-interacting protein 1, mitochondrial [OS=Homo sapiens]                                           | 7.382         | 2.28.E+07         | 2.64.E+07         | 2.28.E+07         | 2.27.E+07         | 2.03.E+07            | 1.97.E+07            | 1.65.E+07            | 1.67.E+07            | 2.23.E+07            | 1.99.E+07            | 1.98.E+07            | 1.78.E+07            |
| 2222 | Q13425-1  | Beta-2-syntrophin [OS=Homo sapiens]                                                                             | 7.362         | 3.92.E+07         | 4.33.E+07         | 4.62.E+07         | 5.30.E+07         | 4.30.E+07            | 4.47.E+07            | 4.75.E+07            | 4.86.E+07            | 5.29.E+07            | 4.87.E+07            | 4.94.E+07            | 5.09.E+07            |
| 2223 | Q9NR28-1  | Diablo homolog, mitochondrial [OS=Homo sapiens]                                                                 | 7.351         | 4.79.E+07         | 5.78.E+07         | 6.10.E+07         | 8.49.E+07         | 7.55.E+07            | 6.63.E+07            | 1.05.E+08            | 8.72.E+07            | 1.01.E+08            | 8.25.E+07            | 9.18.E+07            | 7.99.E+07            |
| 2224 | Q9P2X0-1  | Dolichol-phosphate mannosyltransferase subunit 3 [OS=Homo sapiens]                                              | 7.346         | 3.43.E+06         | 3.13.E+06         | 3.68.E+06         | 3.75.E+06         | 4.63.E+06            | 4.62.E+06            | 5.23.E+06            | 5.64.E+06            | 4.23.E+06            | 3.67.E+06            | 4.31.E+06            | 3.50.E+06            |
| 2225 | O60341    | Lysine-specific histone demethylase 1A [OS=Homo sapiens]                                                        | 7.339         | 1.97.E+07         | 5.11.E+06         | 8.81.E+06         | 6.90.E+06         |                      | 3.33.E+06            | 4.78.E+06            |                      | 1.13.E+07            | 3.30.E+07            | 2.24.E+07            | 2.64.E+07            |
| 2226 | Q9BVC6    | Transmembrane protein 109 [OS=Homo sapiens]                                                                     | 7.338         | 4.13.E+07         | 7.81.E+07         | 9.29.E+07         | 1.01.E+08         | 7.66.E+07            | 1.09.E+08            | 1.16.E+08            | 1.07.E+08            | 8.25.E+07            | 1.11.E+08            | 1.13.E+08            | 1.20.E+08            |
| 2227 | Q4VC31    | coiled-coil domain-containing protein 58 [OS=Homo sapiens]                                                      | 7.336         | 2.81.E+07         | 3.16.E+07         | 2.71.E+07         | 2.92.E+07         | 2.43.E+07            | 1.99.E+07            | 2.23.E+07            | 2.60.E+07            | 3.20.E+07            | 2.86.E+07            | 3.05.E+07            | 3.30.E+07            |
| 2228 | Q8N806    | Putative E3 ubiquitin-protein ligase UBR7 [OS=Homo sapiens]                                                     | 7.32          | 1.23.E+07         | 6.74.E+06         | 7.23.E+06         | 9.88.E+06         | 8.59.E+06            | 1.02.E+07            | 1.04.E+07            | 9.74.E+06            | 7.53.E+06            | 6.48.E+06            | 7.42.E+06            | 5.95.E+06            |
| 2229 | P82650    | 28S ribosomal protein S22, mitochondrial [OS=Homo sapiens]                                                      | 7.27          |                   |                   |                   |                   |                      |                      |                      |                      |                      |                      |                      |                      |
| 2230 | Q9UIQ6-1  | Leucyl-cystinyl aminopeptidase [OS=Homo sapiens]                                                                | 7.23          | 3.09.E+06         | 1.69.E+06         | 2.20.E+06         | 1.38.E+06         | 4.58.E+06            | 3.98.E+06            | 4.57.E+06            | 3.82.E+06            | 4.51.E+06            | 4.30.E+06            | 4.45.E+06            | 4.43.E+06            |
| 2231 | Q08AM6    | Protein VAC14 homolog [OS=Homo sapiens]                                                                         | 7.23          | 6.26.E+05         | 4.83.E+05         | 6.68.E+05         | 9.07.E+05         | 9.58.E+05            | 1.01.E+06            | 1.01.E+06            | 9.15.E+05            | 8.15.E+05            | 7.68.E+05            | 8.69.E+05            | 8.35.E+05            |
| 2232 | Q9NRK6    | ATP-binding cassette sub-family B member 10, mitochondrial [OS=Homo sapiens]                                    | 7.226         | 8.94.E+07         | 9.92.E+07         | 9.71.E+07         | 8.76.E+07         | 9.97.E+07            | 1.01.E+08            | 9.29.E+07            | 9.48.E+07            | 9.58.E+07            | 9.46.E+07            | 9.43.E+07            | 8.71.E+07            |
| 2233 | Q9BYD1    | 39S ribosomal protein L13, mitochondrial [OS=Homo sapiens]                                                      | 7.217         | 2.68.E+07         | 4.52.E+07         | 4.92.E+07         | 4.23.E+07         | 3.85.E+07            | 3.89.E+07            | 4.09.E+07            | 4.01.E+07            | 4.24.E+07            | 4.71.E+07            | 4.57.E+07            | 4.52.E+07            |
| 2234 | Q9NX46    | Poly(ADP-ribose) glycohydrolase ARH3 [OS=Homo sapiens]                                                          | 7.206         | 1.20.E+07         | 1.23.E+07         | 1.22.E+07         | 1.20.E+07         | 1.64.E+07            | 1.60.E+07            | 1.36.E+07            | 1.45.E+07            | 1.41.E+07            | 1.31.E+07            | 1.43.E+07            | 1.30.E+07            |
| 2235 | Q3KQU3    | MAP7 domain-containing protein 1 [OS=Homo sapiens]                                                              | 7.199         | 1.02.E+07         | 8.09.E+06         | 7.38.E+06         | 1.03.E+07         | 9.62.E+06            | 1.01.E+07            | 8.75.E+06            | 5.03.E+06            | 8.54.E+06            | 4.11.E+06            | 7.65.E+06            | 5.35.E+06            |
| 2236 | Q14192    | Four and a half LIM domains protein 2 [OS=Homo sapiens]                                                         | 7.188         | 1.93.E+07         | 2.68.E+07         | 2.78.E+07         | 2.63.E+07         | 2.52.E+07            | 3.19.E+07            | 3.27.E+07            | 2.98.E+07            | 3.12.E+07            | 3.93.E+07            | 4.27.E+07            | 3.61.E+07            |
| 2237 | Q06587    | E3 ubiquitin-protein ligase RING1 [OS=Homo sapiens]                                                             | 7.187         | 1.65.E+07         | 1.94.E+07         | 2.04.E+07         | 2.02.E+07         | 1.77.E+07            | 1.80.E+07            | 2.02.E+07            | 1.95.E+07            | 1.94.E+07            | 1.95.E+07            | 2.14.E+06            | 1.52.E+07            |
| 2238 | O95747    | Serine/threonine-protein kinase OSR1 [OS=Homo sapiens]                                                          | 7.185         | 3.22.E+07         | 3.19.E+07         | 3.42.E+07         | 3.13.E+07         | 3.23.E+07            | 2.83.E+07            | 3.36.E+07            | 3.55.E+07            | 3.48.E+07            | 3.37.E+07            | 3.52.E+07            | 3.35.E+07            |
| 2239 | Q9BSH4    | Translational activator of cytochrome c oxidase 1 [OS=Homo sapiens]                                             | 7.173         | 2.96.E+07         | 2.74.E+07         | 3.42.E+07         | 3.13.E+07         | 3.22.E+07            | 3.20.E+07            | 2.73.E+07            | 3.11.E+07            | 3.05.E+07            | 3.43.E+07            | 3.50.E+07            | 3.13.E+07            |
| 2240 | Q06546    | GA-binding protein alpha chain [OS=Homo sapiens]                                                                | 7.167         | 1.93.E+07         | 2.28.E+07         | 2.34.E+07         | 2.06.E+07         | 3.32.E+07            | 3.92.E+07            | 4.04.E+07            | 3.28.E+07            | 5.84.E+07            | 5.20.E+07            | 5.83.E+07            | 6.09.E+07            |
| 2241 | Q8N684-1  | Cleavage and polyadenylation specificity factor subunit 7 [OS=Homo sapiens]                                     | 7.166         | 3.53.E+07         | 3.73.E+07         | 3.56.E+07         | 3.74.E+07         | 3.42.E+07            | 3.33.E+07            | 3.34.E+07            | 3.73.E+07            | 4.65.E+07            | 4.26.E+07            | 4.19.E+07            | 4.02.E+07            |
| 2242 | Q8NBN3-1  | Transmembrane protein 87A [OS=Homo sapiens]                                                                     | 7.149         | 6.98.E+06         | 4.47.E+06         | 8.47.E+06         | 6.39.E+06         | 5.70.E+06            | 9.33.E+06            | 9.13.E+06            | 8.63.E+06            | 6.32.E+06            | 7.73.E+06            | 6.80.E+06            | 8.98.E+06            |
| 2243 | Q8TE06    | gem-associated protein 5 [OS=Homo sapiens]                                                                      | 7.148         | 8.98.E+07         | 8.80.E+07         | 8.30.E+07         | 8.68.E+07         | 9.98.E+07            | 6.56.E+07            | 6.75.E+07            | 2.51.E+06            | 7.38.E+06            | 9.08.E+07            | 9.26.E+07            | 9.29.E+07            |
| 2244 | Q15006    | ER membrane protein complex subunit 2 [OS=Homo sapiens]                                                         | 7.14          | 4.81.E+06         | 5.51.E+06         | 4.58.E+06         | 5.79.E+06         | 6.11.E+06            | 5.58.E+06            | 5.51.E+06            | 5.07.E+06            | 5.10.E+06            | 5.15.E+06            | 4.59.E+06            | 4.88.E+06            |
| 2245 | Q8NI36    | WD repeat-containing protein 36 [OS=Homo sapiens]                                                               | 7.137         | 2.91.E+07         | 2.31.E+07         | 2.30.E+07         | 2.46.E+07         | 2.39.E+07            | 2.17.E+07            | 2.20.E+07            | 1.73.E+07            | 1.96.E+07            | 2.12.E+07            | 2.17.E+07            | 1.93.E+07            |
| 2246 | O75251    | NADH dehydrogenase [ubiquinone] iron-sulfur protein 7, mitochondrial [OS=Homo sapiens]                          | 7.132         | 5.98.E+06         | 4.45.E+06         | 4.12.E+06         | 1.35.E+06         | 5.87.E+06            | 4.79.E+06            | 5.28.E+06            | 5.10.E+06            | 4.27.E+06            | 3.93.E+06            | 4.21.E+06            | 3.70.E+06            |
| 2247 | Q43156    | TELO2-interacting protein 1 homolog [OS=Homo sapiens]                                                           | 7.132         | 9.81.E+06         | 7.45.E+06         | 8.79.E+06         | 7.82.E+06         | 8.23.E+06            | 7.51.E+06            | 7.96.E+06            | 7.99.E+06            | 8.10.E+06            | 9.18.E+06            | 9.90.E+06            | 9.02.E+06            |
| 2248 | Q99735    | microsomal glutathione S-transferase 2 [OS=Homo sapiens]                                                        | 7.126         | 3.50.E+07         | 3.70.E+07         | 3.82.E+07         | 3.38.E+07         | 3.81.E+07            | 3.82.E+07            | 3.82.E+07            | 4.00.E+07            | 3.92.E+07            | 3.59.E+07            | 3.82.E+07            | 3.81.E+07            |
| 2249 | Q9NW64-1  | Pre-mRNA-splicing factor RBM22 [OS=Homo sapiens]                                                                | 7.115         | 2.87.E+07         | 3.17.E+07         | 3.28.E+07         | 3.05.E+07         | 2.99.E+07            | 2.88.E+07            | 3.11.E+07            | 3.20.E+07            | 3.51.E+07            | 3.64.E+07            | 3.61.E+07            | 3.24.E+07            |
| 2250 | P51159-1  | Ras-related protein Rab-27A [OS=Homo sapiens]                                                                   | 7.107         | 5.72.E+07         | 5.83.E+07         | 5.99.E+07         | 3.27.E+07         | 8.81.E+07            | 9.10.E+07            | 5.84.E+07            | 9.31.E+07            | 9.61.E+07            | 1.00.E+08            | 1.03.E+08            | 1.02.E+08            |
| 2251 | Q9H324    | DnaJ homolog subfamily C member 5 [OS=Homo sapiens]                                                             | 7.097         | 2.79.E+07         | 2.92.E+07         | 2.99.E+07         | 3.61.E+07         | 3.32.E+07            | 3.43.E+07            | 3.57.E+07            | 3.59.E+07            | 3.90.E+07            | 3.94.E+07            | 3.90.E+07            | 3.89.E+07            |
| 2252 | P46736    | Lys-63-specific deubiquitinase BRCC36 [OS=Homo sapiens]                                                         | 7.092         | 1.22.E+07         | 1.31.E+07         | 1.34.E+07         | 9.60.E+06         | 7.98.E+06            | 7.97.E+06            | 8.65.E+06            | 8.27.E+06            | 1.30.E+07            | 1.23.E+07            | 1.28.E+07            | 1.14.E+07            |
| 2253 | P08174-1  | Complement decay-accelerating factor [OS=Homo sapiens]                                                          | 7.088         |                   |                   |                   |                   |                      |                      |                      |                      |                      |                      |                      |                      |
| 2254 | Q8N668    | COMM domain-containing protein 1 [OS=Homo sapiens]                                                              | 7.045         | 1.31.E+07         |                   |                   |                   | 1.31.E+06            |                      |                      |                      |                      |                      |                      |                      |
| 2255 | Q96A35    | 39S ribosomal protein L24, mitochondrial [OS=Homo sapiens]                                                      | 7.023         | 1.20.E+07         | 2.10.E+07         | 1.67.E+07         | 1.82.E+07         | 1.48.E+07            | 7.77.E+06            | 1.34.E+07            | 1.11.E+07            | 1.88.E+07            | 1.53.E+07            | 1.74.E+07            | 1.58.E+07            |
| 2256 | P54709    | sodium/potassium-transporting ATPase subunit beta-3 [OS=Homo sapiens]                                           | 7.018         | 1.34.E+08         | 1.35.E+08         | 1.20.E+08         | 1.25.E+08         | 1.23.E+08            | 1.15.E+08            | 1.19.E+08            | 1.15.E+08            | 1.63.E+08            | 1.75.E+08            | 1.70.E+08            | 1.53.E+08            |
| 2257 | Q13232    | Nucleoside diphosphate kinase 3 [OS=Homo sapiens]                                                               | 7.012         | 3.60.E+07         | 2.79.E+07         | 2.89.E+07         | 3.33.E+07         | 2.19.E+07            | 2.11.E+07            | 1.96.E+07            | 1.62.E+07            | 2.85.E+07            | 2.81.E+07            | 2.93.E+07            | 3.11.E+07            |
| 2258 | A4D1E9-1  | GTP-binding protein 10 [OS=Homo sapiens]                                                                        | 6.999         |                   |                   |                   | 6.94.E+05         | 2.95.E+06            | 2.34.E+06            | 6.02.E+06            | 6.62.E+06            |                      |                      |                      |                      |
| 2259 | O15042    | U2 snRNP-associated SURP motif-containing protein [OS=Homo sapiens]                                             | 6.985         | 1.46.E+07         | 1.70.E+07         | 1.49.E+07         | 1.30.E+07         | 1.75.E+07            | 1.69.E+07            | 1.71.E+07            | 1.86.E+07            | 1.77.E+07            | 1.86.E+07            | 1.56.E+07            | 1.74.E+07            |
| 2260 | C9JRZ8    | Aldo-keto reductase family 1 member B15 [OS=Homo sapiens]                                                       | 6.983         |                   |                   |                   |                   | 7.47.E+06            | 8.03.E+06            | 7.43.E+06            | 5.14.E+06            |                      |                      |                      |                      |
| 2261 | Q04446    | 1,4-alpha-glucan-branching enzyme [OS=Homo sapiens]                                                             | 6.96          | 1.02.E+07         | 1.04.E+07         | 4.67.E+06         | 9.06.E+06         | 1.01.E+07            | 1.76.E+07            | 1.04.E+07            | 1.31.E+07            | 6.80.E+06            | 1.29.E+07            | 1.28.E+07            | 1.33.E+07            |
| 2262 | Q4KMP7    | TBC1 domain family member 10B [OS=Homo sapiens]                                                                 | 6.958         | 2.38.E+06         | 3.19.E+06         | 2.91.E+06         | 3.24.E+06         | 3.27.E+06            | 2.93.E+06            | 3.00.E+06            | 3.24.E+06            | 3.22.E+06            | 2.89.E+06            | 2.69.E+06            | 2.44.E+06            |
| 2263 | Q43913    | Origin recognition complex subunit 5 [OS=Homo sapiens]                                                          | 6.956         | 1.11.E+07         |                   | 3.84.E+06         |                   | 6.70.E+06            | 1.92.E+06            | 3.46.E+06            | 2.51.E+06            | 3.97.E+06            | 1.47.E+06            | 4.87.E+06            |                      |
| 2264 | Q14181    | DNA polymerase alpha subunit B [OS=Homo sapiens]                                                                | 6.941         | 9.39.E+06         | 8.31.E+06         | 9.61.E+06         | 1.35.E+07         | 1.20.E+07            | 1.04.E+07            | 6.35.E+06            | 1.13.E+07            | 6.76.E+06            | 7.63.E+06            | 8.16.E+06            | 8.19.E+06            |
| 2265 | Q4G0J3    | La-related protein 7 [OS=Homo sapiens]                                                                          | 6.9           | 2.96.E+07         | 3.08.E+07         | 3.16.E+07         | 2.76.E+07         | 2.38.E+07            | 2.00.E+07            | 2.10.E+07            | 2.94.E+07            | 2.22.E+07            | 2.48.E+07            | 2.13.E+07            | 2.28.E+07            |
| 2266 | Q92696    | geranylgeranyl transferase type-2 subunit alpha [OS=Homo sapiens]                                               | 6.893         |                   | 2.73.E+06         | 2.76.E+06         | 1.84.E+05         | 5.06.E+06            | 4.78.E+06            | 4.56.E+06            | 2.65.E+06            | 4.92.E+06            | 5.74.E+06            | 5.51.E+06            | 4.81.E+06            |
| 2267 | Q9UJA5-1  | tRNA (adenine(58)-N(1))-methyltransferase non-catalytic subunit TRM6 [OS=Homo sapiens]                          | 6.852         | 3.45.E+07         | 2.00.E+07         | 7.43.E+06         | 3.05.E+07         | 7.31.E+06            | 6.60.E+06            | 7.50.E+06            | 7.35.E+06            | 2.30.E+07            | 5.85.E+06            | 7.67.E+06            | 5.71.E+06            |
| 2268 | Q00765    | Receptor expression-enhancing protein 5 [OS=Homo sapiens]                                                       | 6.852         | 2.05.E+08         | 2.32.E+08         | 1.95.E+08         | 1.85.E+08         | 2.20.E+08            | 2.17.E+08            | 2.28.E+08            | 2.15.E+08            | 2.61.E+08            | 2.11.E+08            | 2.10.E+08            | 2.09.E+08            |
| 2269 | Q9BQ69    | O-acetyl-ADP-ribose deacetylase MACROD1 [OS=Homo sapiens]                                                       | 6.829         |                   |                   |                   |                   |                      |                      |                      | 5.07.E+06            | 7.02.E+07            | 7.47.E+07            | 7.66.E+07            | 8.31.E+07            |
| 2270 | O95295    | SNARE-associated protein Snapin [OS=Homo sapiens]                                                               | 6.811         |                   |                   |                   |                   | 1.76.E+05            |                      |                      |                      |                      |                      |                      |                      |
| 2271 | P54578    | Ubiquitin carboxyl-terminal hydrolase 14 [OS=Homo sapiens]                                                      | 6.805         | 1.57.E+07         | 1.64.E+07         | 2.01.E+07         | 1.90.E+07         | 2.17.E+07            | 2.32.E+07            | 2.37.E+07            | 2.41.E+07            | 1.77.E+07            | 2.21.E+07            | 1.84.E+07            | 1.85.E+07            |
| 2272 | P57060    | RWD domain-containing protein 2B [OS=Homo sapiens]                                                              | 6.798         |                   |                   |                   |                   |                      |                      |                      |                      |                      |                      |                      |                      |

| No.  | Accession | Description                                                                        | Sum PEP Score | CTRL Abundances_1 | CTRL Abundances_2 | CTRL Abundances_3 | CTRL Abundances_4 | CLDN6-1 Abundances_1 | CLDN6-1 Abundances_2 | CLDN6-1 Abundances_3 | CLDN6-1 Abundances_4 | CLDN6-2 Abundances_1 | CLDN6-2 Abundances_2 | CLDN6-2 Abundances_3 | CLDN6-2 Abundances_4 |
|------|-----------|------------------------------------------------------------------------------------|---------------|-------------------|-------------------|-------------------|-------------------|----------------------|----------------------|----------------------|----------------------|----------------------|----------------------|----------------------|----------------------|
| 2273 | Q9NPD3    | Exosome complex component Rrp41 [OS=Homo sapiens]                                  | 6.777         | 2.12.E+07         | 1.94.E+07         | 1.81.E+07         | 1.90.E+07         | 1.51.E+07            | 1.45.E+07            | 1.42.E+07            | 1.32.E+07            | 1.92.E+07            | 1.59.E+07            | 1.66.E+07            | 1.79.E+07            |
| 2274 | Q8IZL8    | Proline-, glutamic acid- and leucine-rich protein 1 [OS=Homo sapiens]              | 6.75          | 6.90.E+06         | 4.16.E+06         | 5.24.E+06         | 6.11.E+06         | 4.69.E+06            | 6.25.E+06            | 5.71.E+06            | 6.09.E+06            | 3.30.E+06            | 4.66.E+06            | 4.33.E+06            | 5.67.E+06            |
| 2275 | Q6NUC4    | Transmembrane protein 214 [OS=Homo sapiens]                                        | 6.734         | 3.04.E+07         | 2.51.E+07         | 3.11.E+07         | 3.14.E+07         | 3.85.E+07            | 4.81.E+07            | 4.66.E+07            | 4.72.E+07            | 3.02.E+07            | 3.72.E+07            | 3.85.E+07            | 3.84.E+07            |
| 2276 | Q92685-1  | Dol-P-Man:Man(5)GlcNAc(2)-PP-Dol alpha-1,3-mannosyltransferase [OS=Homo sapiens]   | 6.73          | 9.20.E+06         | 8.13.E+06         | 7.65.E+06         | 7.76.E+06         | 1.04.E+07            | 1.04.E+07            | 9.82.E+06            | 1.04.E+07            | 1.15.E+07            | 1.40.E+07            | 1.04.E+07            | 1.44.E+07            |
| 2277 | Q92643    | GPI-anchor transamidase [OS=Homo sapiens]                                          | 6.714         | 3.24.E+07         | 2.02.E+07         | 3.60.E+07         | 4.15.E+07         | 3.61.E+07            | 7.39.E+07            | 6.31.E+06            | 6.22.E+06            | 3.01.E+07            | 2.59.E+07            | 3.75.E+07            | 3.32.E+07            |
| 2278 | Q7Z2W9    | 39S ribosomal protein L21, mitochondrial [OS=Homo sapiens]                         | 6.712         | 1.95.E+07         | 1.22.E+07         | 1.38.E+07         | 2.14.E+07         | 2.11.E+07            | 1.86.E+07            | 1.90.E+07            | 1.26.E+07            | 2.01.E+07            | 1.47.E+07            | 2.15.E+07            | 2.34.E+07            |
| 2279 | O95249-1  | Golgi SNAP receptor complex member 1 [OS=Homo sapiens]                             | 6.7           | 3.78.E+07         | 2.89.E+07         | 3.86.E+07         |                   | 3.00.E+07            | 6.41.E+07            | 5.40.E+07            | 4.86.E+07            | 4.47.E+07            | 4.95.E+07            |                      | 4.88.E+07            |
| 2280 | Q9BXW7    | Haloacid dehalogenase-like hydrolase domain-containing 5 [OS=Homo sapiens]         | 6.696         | 5.53.E+05         | 7.23.E+06         |                   | 1.01.E+07         |                      | 2.32.E+06            |                      |                      | 1.07.E+07            | 9.44.E+06            | 1.00.E+07            | 9.14.E+06            |
| 2281 | Q8WXA9-2  | Isoform 2 of Splicing regulatory glutamine/lysine-rich protein 1 [OS=Homo sapiens] | 6.695         | 1.27.E+07         | 7.47.E+06         | 7.25.E+06         | 9.67.E+06         | 8.14.E+06            | 9.67.E+06            | 3.60.E+06            |                      | 5.90.E+06            | 7.64.E+06            | 7.16.E+06            | 1.20.E+07            |
| 2282 | Q99598    | Translin-associated protein X [OS=Homo sapiens]                                    | 6.688         | 1.39.E+07         |                   | 1.10.E+07         | 1.19.E+07         | 7.56.E+06            | 9.50.E+06            | 7.94.E+06            | 1.09.E+07            | 7.78.E+06            | 1.07.E+07            | 1.11.E+07            | 1.16.E+07            |
| 2283 | Q14919-1  | Dr1-associated corepressor [OS=Homo sapiens]                                       | 6.687         | 5.20.E+06         | 1.03.E+07         | 1.09.E+07         | 1.32.E+07         | 1.46.E+07            | 1.43.E+07            | 1.44.E+07            | 1.30.E+07            | 1.42.E+07            | 1.26.E+07            | 1.34.E+07            | 1.34.E+07            |
| 2284 | Q92797-1  | Symplekin [OS=Homo sapiens]                                                        | 6.687         | 9.89.E+06         | 6.89.E+06         | 8.77.E+06         | 1.29.E+06         | 6.53.E+06            | 5.83.E+06            | 6.62.E+06            | 5.34.E+06            |                      | 6.80.E+06            | 7.01.E+06            | 7.30.E+06            |
| 2285 | A8MWD9    | Putative small nuclear ribonucleoprotein G-like protein 15 [OS=Homo sapiens]       | 6.666         | 1.68.E+08         | 1.33.E+08         | 1.02.E+08         | 1.75.E+08         | 2.25.E+08            | 2.24.E+08            | 2.17.E+08            | 1.92.E+08            | 2.00.E+08            | 1.74.E+08            | 1.71.E+08            | 2.20.E+08            |
| 2286 | P35658-1  | Nuclear pore complex protein Nup214 [OS=Homo sapiens]                              | 6.666         |                   | 5.42.E+06         | 7.85.E+06         | 6.93.E+06         | 1.41.E+07            | 1.17.E+07            | 1.23.E+07            | 1.20.E+07            | 8.29.E+06            | 4.58.E+06            | 9.45.E+06            | 7.83.E+06            |
| 2287 | Q9UPN9-1  | E3 ubiquitin-protein ligase TRIM33 [OS=Homo sapiens]                               | 6.663         | 8.12.E+06         | 7.95.E+06         | 7.10.E+06         | 8.44.E+06         | 8.26.E+06            | 5.81.E+06            | 6.91.E+06            | 8.61.E+06            | 7.23.E+06            | 8.06.E+06            | 7.58.E+06            | 8.98.E+06            |
| 2288 | Q8WVV9    | Heterogeneous nuclear ribonucleoprotein L-like [OS=Homo sapiens]                   | 6.659         | 1.72.E+07         | 1.54.E+07         | 1.59.E+07         | 1.55.E+07         | 1.31.E+07            | 1.21.E+07            | 1.21.E+07            | 1.42.E+07            | 1.51.E+07            | 1.79.E+07            | 1.57.E+07            |                      |
| 2289 | Q9NV56    | MRG/MORF4L-binding protein [OS=Homo sapiens]                                       | 6.646         |                   | 8.81.E+06         | 1.30.E+07         | 3.29.E+07         | 1.11.E+07            | 2.64.E+07            |                      | 1.82.E+07            | 1.00.E+07            |                      |                      |                      |
| 2290 | Q9UPQ0-1  | LIM and calponin homology domains-containing protein 1 [OS=Homo sapiens]           | 6.606         | 3.85.E+06         | 2.06.E+06         | 2.89.E+06         | 2.18.E+06         | 4.72.E+06            | 4.12.E+06            | 5.22.E+06            | 5.42.E+06            | 2.33.E+06            | 3.33.E+06            | 3.38.E+06            | 4.08.E+06            |
| 2291 | Q5VTL8    | Pre-mRNA-splicing factor 38B [OS=Homo sapiens]                                     | 6.591         | 1.51.E+07         | 1.46.E+06         | 1.88.E+07         |                   | 1.02.E+07            | 1.74.E+07            | 1.90.E+07            | 1.97.E+07            | 1.16.E+07            | 1.22.E+07            | 1.46.E+07            | 2.06.E+07            |
| 2292 | Q96TC7    | Regulator of microtubule dynamics protein 3 [OS=Homo sapiens]                      | 6.544         |                   |                   |                   |                   |                      |                      |                      |                      |                      |                      |                      |                      |
| 2293 | Q9Y2R0    | Cytochrome c oxidase assembly factor 3 homolog, mitochondrial [OS=Homo sapiens]    | 6.535         | 3.18.E+07         | 3.51.E+07         | 3.81.E+07         | 3.48.E+07         | 3.77.E+07            | 4.10.E+07            | 3.97.E+07            | 4.35.E+07            | 4.14.E+07            | 3.79.E+07            | 3.63.E+07            | 3.73.E+07            |
| 2294 | P03928    | ATP synthase protein 8 [OS=Homo sapiens]                                           | 6.533         | 6.19.E+07         | 6.63.E+07         | 6.77.E+07         | 6.98.E+07         | 7.48.E+07            | 7.09.E+07            | 7.07.E+07            | 7.06.E+07            | 7.41.E+07            | 8.05.E+07            | 8.10.E+07            | 7.46.E+07            |
| 2295 | Q8WYA6    | Beta-catenin-like protein 1 [OS=Homo sapiens]                                      | 6.527         | 4.90.E+07         | 4.82.E+07         | 5.08.E+07         | 5.18.E+07         | 4.50.E+07            | 4.62.E+07            | 4.58.E+07            | 4.39.E+07            | 4.79.E+07            | 4.50.E+07            | 4.68.E+07            | 5.25.E+07            |
| 2296 | O43929    | origin recognition complex subunit 4 [OS=Homo sapiens]                             | 6.522         | 2.44.E+06         | 2.24.E+06         | 2.22.E+06         | 2.98.E+06         | 3.20.E+06            | 3.25.E+06            | 3.43.E+06            | 2.68.E+06            | 2.32.E+06            | 2.80.E+06            | 1.50.E+06            | 1.33.E+06            |
| 2297 | Q6ZSJ8    | Uncharacterized protein C1orf122 [OS=Homo sapiens]                                 | 6.514         | 5.73.E+06         | 6.61.E+06         | 6.46.E+06         | 7.37.E+06         | 7.25.E+06            | 5.58.E+06            | 6.64.E+06            | 4.90.E+06            | 6.76.E+06            | 6.79.E+06            | 7.47.E+06            | 6.61.E+06            |
| 2298 | Q14517    | Protocadherin Fat 1 [OS=Homo sapiens]                                              | 6.465         |                   | 8.80.E+05         | 1.54.E+06         | 1.52.E+06         |                      | 2.03.E+06            | 1.67.E+06            | 1.74.E+06            | 9.90.E+05            | 1.74.E+06            | 1.63.E+06            | 1.58.E+06            |
| 2299 | Q9H479    | fructosamine-3-kinase [OS=Homo sapiens]                                            | 6.458         | 1.43.E+07         |                   | 1.11.E+07         | 1.18.E+07         |                      | 3.87.E+06            |                      |                      |                      |                      |                      |                      |
| 2300 | Q9UHA4    | regulator complex protein LAMTOR3 [OS=Homo sapiens]                                | 6.436         | 3.34.E+07         | 3.83.E+07         | 4.19.E+07         | 3.26.E+07         | 3.18.E+07            | 3.07.E+07            |                      | 1.57.E+07            | 3.96.E+07            | 4.07.E+07            | 3.92.E+07            | 4.20.E+07            |
| 2301 | Q16643    | drebrin [OS=Homo sapiens]                                                          | 6.436         | 5.82.E+06         | 7.67.E+06         | 7.00.E+06         | 7.86.E+06         | 1.26.E+07            | 1.30.E+07            | 1.24.E+07            | 1.24.E+07            | 7.46.E+06            | 8.90.E+06            | 7.10.E+06            | 8.11.E+06            |
| 2302 | P48147    | prolyl endopeptidase [OS=Homo sapiens]                                             | 6.41          |                   |                   |                   |                   |                      |                      |                      |                      |                      |                      |                      |                      |
| 2303 | Q8IUR7-1  | Armadillo repeat-containing protein 8 [OS=Homo sapiens]                            | 6.406         | 3.96.E+06         | 3.78.E+06         | 4.19.E+06         |                   | 5.06.E+06            | 3.96.E+06            | 4.59.E+06            | 4.28.E+06            | 4.19.E+06            | 5.05.E+06            | 4.14.E+06            | 4.79.E+06            |
| 2304 | Q16513    | Serine/threonine-protein kinase N2 [OS=Homo sapiens]                               | 6.398         | 1.73.E+07         | 1.30.E+07         | 1.94.E+07         | 1.36.E+07         | 1.19.E+07            | 1.03.E+07            | 1.48.E+07            | 1.02.E+07            | 1.42.E+07            | 1.36.E+07            | 1.26.E+07            | 1.84.E+07            |
| 2305 | Q6PJT7-1  | Zinc finger CCH domain-containing protein 14 [OS=Homo sapiens]                     | 6.391         | 1.69.E+07         | 1.71.E+07         | 1.91.E+07         | 1.43.E+07         | 1.78.E+07            | 1.90.E+07            | 1.72.E+07            | 1.61.E+07            | 2.20.E+07            | 2.41.E+07            | 1.98.E+07            | 2.31.E+07            |
| 2306 | Q9NRG9-1  | Aladin [OS=Homo sapiens]                                                           | 6.384         | 1.18.E+07         | 8.50.E+06         | 1.30.E+07         | 1.61.E+07         | 5.42.E+06            | 7.46.E+06            | 5.62.E+06            | 5.39.E+06            | 7.65.E+06            | 6.42.E+06            | 5.17.E+06            | 1.27.E+07            |
| 2307 | Q9H307    | Pinin [OS=Homo sapiens]                                                            | 6.37          | 2.68.E+07         | 2.51.E+07         | 2.73.E+07         | 3.04.E+07         | 2.71.E+07            | 2.37.E+07            | 2.42.E+07            | 2.39.E+07            | 2.40.E+07            | 2.32.E+07            | 2.50.E+07            | 2.91.E+07            |
| 2308 | O00483    | Cytochrome c oxidase subunit NDUF44 [OS=Homo sapiens]                              | 6.351         | 1.09.E+08         | 1.16.E+08         | 1.10.E+08         | 1.04.E+08         | 1.08.E+08            | 1.10.E+08            | 1.07.E+08            | 1.13.E+08            | 8.82.E+07            | 8.46.E+07            | 8.15.E+07            | 8.39.E+07            |
| 2309 | Q7Z4H3-1  | HD domain-containing protein 2 [OS=Homo sapiens]                                   | 6.344         |                   |                   |                   |                   |                      |                      |                      |                      |                      |                      |                      |                      |
| 2310 | P36915-1  | Guanine nucleotide-binding protein-like 1 [OS=Homo sapiens]                        | 6.342         | 1.92.E+07         | 2.04.E+07         | 2.11.E+07         | 1.89.E+07         | 1.90.E+07            | 1.48.E+07            | 1.89.E+07            | 2.08.E+07            | 1.86.E+07            | 1.84.E+07            | 2.08.E+07            | 1.68.E+07            |
| 2311 | O43670-1  | BUB3-interacting and GLEBS motif-containing protein ZNF207 [OS=Homo sapiens]       | 6.313         | 2.83.E+07         | 2.78.E+07         | 2.21.E+06         | 2.79.E+07         | 2.99.E+07            | 3.65.E+07            | 3.60.E+07            | 3.22.E+07            |                      | 3.76.E+07            | 3.71.E+07            | 3.91.E+07            |
| 2312 | Q9NX20    | 39S ribosomal protein L16, mitochondrial [OS=Homo sapiens]                         | 6.295         | 1.77.E+07         | 1.79.E+07         | 2.12.E+07         | 1.94.E+07         | 1.68.E+07            | 1.80.E+07            | 1.76.E+07            | 1.95.E+07            | 1.45.E+07            | 1.98.E+07            | 2.05.E+07            | 1.89.E+07            |
| 2313 | Q9HAS0    | Protein Njmu-R1 [OS=Homo sapiens]                                                  | 6.282         | 3.94.E+06         | 2.11.E+06         | 2.96.E+06         | 2.78.E+06         | 2.45.E+06            | 2.58.E+06            | 2.19.E+06            | 2.19.E+06            | 2.10.E+06            | 2.16.E+06            | 2.62.E+06            | 2.54.E+06            |
| 2314 | Q9NR56-1  | Muscleblind-like protein 1 [OS=Homo sapiens]                                       | 6.275         | 5.78.E+07         | 6.08.E+07         | 6.59.E+07         | 7.09.E+07         | 5.86.E+07            | 6.63.E+07            | 6.94.E+07            | 7.61.E+07            | 6.00.E+07            | 7.09.E+07            | 6.93.E+07            | 6.69.E+07            |
| 2315 | Q99848    | Probable rRNA-processing protein EBP2 [OS=Homo sapiens]                            | 6.273         | 4.19.E+07         | 3.96.E+07         | 4.50.E+07         | 4.30.E+07         | 3.74.E+07            | 4.45.E+07            | 3.91.E+07            | 3.97.E+07            | 3.14.E+07            | 4.01.E+07            | 3.86.E+07            | 3.57.E+07            |
| 2316 | P37235    | Hippocalcin-like protein 1 [OS=Homo sapiens]                                       | 6.23          | 4.90.E+07         | 5.29.E+07         | 5.07.E+07         | 5.15.E+07         | 5.53.E+07            | 5.64.E+07            | 5.36.E+07            | 5.32.E+07            | 8.15.E+07            | 7.76.E+07            | 8.10.E+07            | 8.20.E+07            |
| 2317 | P21589-1  | 5'-nucleotidase [OS=Homo sapiens]                                                  | 6.228         |                   |                   |                   |                   |                      |                      |                      |                      |                      |                      |                      |                      |
| 2318 | Q9H2H8-1  | peptidyl-prolyl cis-trans isomerase-like 3 [OS=Homo sapiens]                       | 6.209         | 8.45.E+06         | 1.27.E+07         | 1.27.E+07         | 9.30.E+06         | 9.21.E+06            | 1.08.E+07            | 1.03.E+07            | 1.06.E+07            | 1.46.E+07            | 1.18.E+07            | 1.23.E+07            | 1.05.E+07            |
| 2319 | Q9Y6I4-1  | Ubiquitin carboxyl-terminal hydrolase 3 [OS=Homo sapiens]                          | 6.208         | 1.76.E+07         | 1.85.E+07         | 1.31.E+07         | 1.84.E+07         | 2.11.E+07            | 2.05.E+07            | 2.02.E+07            | 1.69.E+07            | 1.50.E+07            | 1.88.E+07            | 1.35.E+07            | 1.69.E+07            |
| 2320 | Q9Y2A7-1  | Nck-associated protein 1 [OS=Homo sapiens]                                         | 6.145         |                   |                   |                   |                   |                      |                      |                      |                      |                      |                      |                      |                      |
| 2321 | Q9BTE3-1  | Mini-chromosome maintenance complex-binding protein [OS=Homo sapiens]              | 6.142         |                   |                   |                   |                   |                      |                      |                      |                      |                      |                      |                      |                      |
| 2322 | Q9BVC4    | target of rapamycin complex subunit LST8 [OS=Homo sapiens]                         | 6.112         | 6.13.E+06         | 4.82.E+06         |                   | 7.24.E+06         | 5.80.E+06            | 7.20.E+06            | 3.63.E+06            | 5.65.E+06            | 7.58.E+06            | 5.31.E+06            | 9.45.E+06            | 1.01.E+07            |
| 2323 | Q9BYT8    | Neurolysin, mitochondrial [OS=Homo sapiens]                                        | 6.105         | 7.07.E+06         | 7.69.E+06         | 8.29.E+06         | 4.15.E+06         |                      | 4.71.E+06            | 3.96.E+06            | 4.54.E+06            | 8.77.E+06            | 4.73.E+06            | 4.48.E+06            |                      |
| 2324 | Q16658    | Fascin [OS=Homo sapiens]                                                           | 6.08          | 1.77.E+07         | 1.83.E+07         | 2.09.E+07         | 1.97.E+07         | 1.09.E+07            | 1.28.E+07            | 1.17.E+07            | 1.33.E+07            | 1.75.E+07            | 2.25.E+07            | 2.84.E+07            | 2.24.E+07            |
| 2325 | Q9UIJ7-1  | GTP:AMP phosphotransferase AK3, mitochondrial [OS=Homo sapiens]                    | 6.08          | 1.00.E+07         | 8.35.E+06         | 9.43.E+06         | 1.48.E+07         | 1.22.E+07            | 1.37.E+07            | 1.40.E+07            | 1.03.E+07            | 1.12.E+07            | 1.18.E+07            | 8.68.E+06            | 1.10.E+07            |
| 2326 | Q6NVY1    | 3-hydroxyisobutyryl-CoA hydrolase, mitochondrial [OS=Homo sapiens]                 | 6.075         | 2.87.E+07         | 3.08.E+07         | 2.72.E+07         | 2.96.E+07         | 2.38.E+07            | 2.28.E+07            | 2.22.E+07            | 2.40.E+07            | 3.71.E+07            | 3.26.E+07            | 3.09.E+07            | 3.25.E+07            |

| No.  | Accession | Description                                                                            | Sum PEP Score | CTRL Abundances_1 | CTRL Abundances_2 | CTRL Abundances_3 | CTRL Abundances_4 | CLDN6-1 Abundances_1 | CLDN6-1 Abundances_2 | CLDN6-1 Abundances_3 | CLDN6-1 Abundances_4 | CLDN6-2 Abundances_1 | CLDN6-2 Abundances_2 | CLDN6-2 Abundances_3 | CLDN6-2 Abundances_4 |
|------|-----------|----------------------------------------------------------------------------------------|---------------|-------------------|-------------------|-------------------|-------------------|----------------------|----------------------|----------------------|----------------------|----------------------|----------------------|----------------------|----------------------|
| 2327 | Q9NUQ8    | ATP-binding cassette sub-family F member 3 [OS=Homo sapiens]                           | 6.067         | 1.71.E+06         | 2.10.E+06         | 1.91.E+06         | 2.79.E+06         | 2.89.E+06            | 2.98.E+06            | 3.47.E+06            | 3.27.E+06            | 2.89.E+06            | 3.01.E+06            | 3.15.E+06            | 4.10.E+06            |
| 2328 | Q86SX6    | Glutaredoxin-related protein 5, mitochondrial [OS=Homo sapiens]                        | 6.047         | 9.30.E+06         | 5.87.E+06         | 1.66.E+07         | 2.11.E+07         | 4.04.E+06            | 1.28.E+07            | 1.21.E+07            | 1.28.E+07            | 4.68.E+06            | 1.24.E+07            | 1.62.E+07            | 1.49.E+07            |
| 2329 | O43447    | peptidyl-prolyl cis-trans isomerase H [OS=Homo sapiens]                                | 6.045         | 4.46.E+07         | 4.30.E+07         | 4.44.E+07         | 4.23.E+07         | 3.78.E+07            | 4.31.E+07            | 4.20.E+07            | 4.29.E+07            | 4.11.E+07            | 4.65.E+07            | 4.57.E+07            | 4.22.E+07            |
| 2330 | Q9Y2R4    | Probable ATP-dependent RNA helicase DDX52 [OS=Homo sapiens]                            | 6.028         |                   |                   |                   |                   |                      |                      |                      |                      |                      |                      |                      |                      |
| 2331 | Q15714-1  | TSC22 domain family protein 1 [OS=Homo sapiens]                                        | 6.027         | 2.83.E+07         | 3.09.E+07         | 3.70.E+07         | 2.96.E+07         | 3.88.E+07            | 4.48.E+07            | 4.13.E+07            | 4.84.E+07            | 4.04.E+07            | 4.35.E+07            | 3.93.E+07            | 4.15.E+07            |
| 2332 | Q86YP4    | Transcriptional repressor p66-alpha [OS=Homo sapiens]                                  | 6.023         | 3.75.E+06         | 3.44.E+06         | 3.58.E+06         | 4.66.E+06         | 4.82.E+06            | 5.61.E+06            | 4.35.E+06            | 4.70.E+06            | 3.64.E+06            | 4.30.E+06            | 4.72.E+06            | 4.88.E+06            |
| 2333 | Q8NBJ5    | Procollagen galactosyltransferase 1 [OS=Homo sapiens]                                  | 6.017         | 1.39.E+07         | 1.86.E+07         | 1.43.E+07         | 1.47.E+07         | 2.32.E+07            | 2.81.E+07            | 1.46.E+07            | 2.84.E+07            | 1.34.E+07            | 1.11.E+07            | 1.82.E+07            | 1.99.E+07            |
| 2334 | Q9UK41-1  | vacuolar protein sorting-associated protein 28 homolog [OS=Homo sapiens]               | 6.012         | 1.50.E+07         | 6.15.E+06         | 1.68.E+07         | 1.50.E+07         | 9.94.E+06            | 1.64.E+07            | 1.68.E+07            |                      | 1.47.E+07            | 1.41.E+07            | 9.76.E+06            | 1.76.E+07            |
| 2335 | P45954    | Short/branched chain specific acyl-CoA dehydrogenase, mitochondrial [OS=Homo sapiens]  | 6             | 1.61.E+07         | 3.96.E+06         | 9.94.E+06         | 9.06.E+06         | 1.32.E+07            | 1.24.E+07            | 7.46.E+06            | 2.80.E+06            | 1.20.E+07            | 3.16.E+06            | 7.88.E+06            | 3.13.E+06            |
| 2336 | Q9NPA8-1  | Transcription and mRNA export factor ENY2 [OS=Homo sapiens]                            | 5.995         | 2.72.E+07         | 2.34.E+07         | 2.19.E+07         | 2.93.E+07         | 2.47.E+07            | 2.38.E+07            | 2.30.E+07            | 2.46.E+07            | 2.61.E+07            | 2.88.E+07            | 3.02.E+07            | 1.59.E+07            |
| 2337 | P62072    | Mitochondrial import inner membrane translocase subunit Tim10 [OS=Homo sapiens]        | 5.98          | 2.43.E+07         | 2.64.E+07         | 2.67.E+07         | 2.90.E+07         | 2.40.E+07            | 2.39.E+07            | 2.38.E+07            | 2.52.E+07            | 2.18.E+07            | 2.50.E+07            | 2.23.E+07            | 2.33.E+07            |
| 2338 | P78346-1  | ribonuclease P protein subunit p30 [OS=Homo sapiens]                                   | 5.97          | 1.15.E+07         | 8.56.E+06         | 1.05.E+07         | 2.83.E+07         | 1.61.E+07            |                      |                      |                      | 1.44.E+07            | 2.34.E+07            |                      | 2.96.E+07            |
| 2339 | Q96S66    | chloride channel CLIC-like protein 1 [OS=Homo sapiens]                                 | 5.966         | 1.17.E+06         | 1.62.E+06         | 1.38.E+06         | 1.34.E+06         | 1.84.E+06            | 2.13.E+06            | 2.41.E+06            | 1.78.E+06            | 1.37.E+06            | 1.84.E+06            | 1.39.E+06            | 1.38.E+06            |
| 2340 | Q13217    | DnaJ homolog subfamily C member 3 [OS=Homo sapiens]                                    | 5.964         | 1.30.E+07         | 9.76.E+06         | 1.02.E+07         | 3.35.E+06         | 1.63.E+07            | 1.29.E+07            | 4.26.E+06            | 1.06.E+07            | 1.26.E+07            | 3.47.E+06            | 3.70.E+06            | 9.22.E+06            |
| 2341 | Q9NV11-3  | Fanconi anemia group I protein [OS=Homo sapiens]                                       | 5.931         | 7.00.E+06         | 5.80.E+06         | 4.97.E+06         | 4.90.E+06         | 8.07.E+06            | 5.78.E+06            | 6.43.E+06            | 6.79.E+06            | 4.21.E+06            | 4.37.E+06            | 5.23.E+06            | 4.29.E+06            |
| 2342 | Q8NG11-1  | Tetraspanin-14 [OS=Homo sapiens]                                                       | 5.922         | 2.32.E+06         | 3.81.E+06         | 2.74.E+06         | 3.25.E+06         | 7.33.E+06            | 6.46.E+06            | 6.43.E+06            | 7.55.E+06            | 5.01.E+06            | 4.24.E+06            | 4.50.E+06            | 5.41.E+06            |
| 2343 | Q9P2W9    | Syntaxin-18 [OS=Homo sapiens]                                                          | 5.901         | 4.11.E+06         | 3.20.E+06         | 3.72.E+06         | 3.61.E+06         | 3.99.E+06            | 3.51.E+06            | 4.16.E+06            | 3.17.E+06            | 3.66.E+06            | 4.69.E+06            | 3.28.E+06            | 4.44.E+06            |
| 2344 | O14776-1  | Transcription elongation regulator 1 [OS=Homo sapiens]                                 | 5.898         | 4.49.E+07         | 5.07.E+07         | 5.24.E+07         | 6.65.E+07         | 3.63.E+07            | 4.68.E+07            | 4.19.E+07            | 3.98.E+07            | 4.73.E+07            | 5.52.E+07            | 4.76.E+07            | 5.06.E+07            |
| 2345 | Q9UBH6    | Xenotropic and polytropic retrovirus receptor 1 [OS=Homo sapiens]                      | 5.87          |                   | 5.63.E+06         | 4.93.E+06         | 5.95.E+06         | 4.71.E+06            | 4.58.E+06            | 5.09.E+06            | 4.63.E+06            | 3.82.E+06            | 3.76.E+06            | 3.97.E+06            | 4.30.E+06            |
| 2346 | Q8N5M1    | ATP synthase mitochondrial F1 complex assembly factor 2 [OS=Homo sapiens]              | 5.866         | 5.10.E+06         | 6.09.E+06         | 4.56.E+06         | 7.17.E+06         | 5.01.E+06            | 4.52.E+06            | 5.10.E+06            | 2.85.E+06            | 3.59.E+06            | 3.52.E+06            | 3.98.E+06            | 3.61.E+06            |
| 2347 | Q99549    | M-phase phosphoprotein 8 [OS=Homo sapiens]                                             | 5.856         | 1.24.E+07         | 1.03.E+07         | 1.12.E+07         | 1.03.E+07         | 9.20.E+06            | 8.03.E+06            | 5.83.E+06            | 9.87.E+06            | 9.12.E+06            | 8.66.E+06            | 8.99.E+06            | 8.51.E+06            |
| 2348 | P49407-1  | Beta-arrestin-1 [OS=Homo sapiens]                                                      | 5.838         | 4.50.E+06         | 5.45.E+06         | 5.22.E+06         | 5.30.E+06         | 1.91.E+06            | 1.57.E+06            | 1.50.E+06            | 1.62.E+06            | 4.69.E+06            | 4.81.E+06            | 4.93.E+06            | 4.85.E+06            |
| 2349 | Q9BXS5-1  | AP-1 complex subunit mu-1 [OS=Homo sapiens]                                            | 5.823         | 3.51.E+07         | 3.28.E+07         | 3.33.E+07         | 3.54.E+07         | 3.25.E+07            | 3.12.E+07            | 3.46.E+07            | 3.37.E+07            | 3.54.E+07            | 3.33.E+07            | 3.18.E+07            | 3.22.E+07            |
| 2350 | Q9UMY4-1  | Sorting nexin-12 [OS=Homo sapiens]                                                     | 5.808         | 9.95.E+06         | 9.53.E+06         | 1.02.E+07         | 1.17.E+07         | 8.43.E+06            | 1.10.E+07            | 9.05.E+06            | 1.09.E+07            | 1.18.E+07            | 1.08.E+07            | 1.25.E+07            | 1.27.E+07            |
| 2351 | Q9BY77    | Polymerase delta-interacting protein 3 [OS=Homo sapiens]                               | 5.807         | 1.74.E+07         | 1.15.E+07         | 1.00.E+07         | 1.14.E+07         | 1.13.E+07            | 1.39.E+07            | 1.78.E+07            | 1.27.E+07            | 1.01.E+07            | 1.33.E+07            | 9.03.E+06            | 1.32.E+07            |
| 2352 | Q9Y315    | deoxyribose-phosphate aldolase [OS=Homo sapiens]                                       | 5.8           | 2.36.E+07         | 1.85.E+07         | 2.12.E+07         | 2.19.E+07         | 1.96.E+07            | 7.75.E+06            | 1.84.E+07            | 2.21.E+07            | 2.24.E+07            | 1.90.E+07            | 1.95.E+07            | 1.95.E+07            |
| 2353 | Q13505    | Metaxin-1 OS=Homo sapiens OX=9606 GN=MTX1 PE=1 SV=3                                    | 5.79          | 3.82.E+07         | 6.37.E+06         | 7.50.E+06         | 1.38.E+07         | 2.67.E+07            | 1.04.E+07            | 9.21.E+06            | 8.36.E+06            | 1.29.E+07            | 1.08.E+07            | 1.70.E+07            | 1.69.E+07            |
| 2354 | Q8N6H7    | ADP-ribosylation factor GTPase-activating protein 2 [OS=Homo sapiens]                  | 5.789         | 3.59.E+07         | 3.88.E+07         | 3.34.E+07         | 3.35.E+07         | 3.65.E+07            | 3.64.E+07            | 3.86.E+07            | 3.37.E+07            | 4.49.E+07            | 3.99.E+07            | 3.80.E+07            | 3.32.E+07            |
| 2355 | Q86WQ0    | nuclear receptor 2C2-associated protein [OS=Homo sapiens]                              | 5.69          | 2.22.E+06         | 2.71.E+06         | 2.07.E+06         | 2.21.E+06         | 3.17.E+06            | 3.14.E+06            | 3.29.E+06            | 2.60.E+06            | 2.58.E+06            | 2.58.E+06            | 2.34.E+06            | 2.22.E+06            |
| 2356 | Q9BSC4-1  | Nucleolar protein 10 [OS=Homo sapiens]                                                 | 5.679         | 6.21.E+06         | 6.15.E+06         | 6.03.E+06         | 8.24.E+06         | 5.94.E+06            | 7.92.E+06            | 6.29.E+06            | 5.74.E+06            | 4.94.E+06            | 5.44.E+06            | 4.78.E+06            | 4.55.E+06            |
| 2357 | P28799    | Granulins [OS=Homo sapiens]                                                            | 5.661         | 9.77.E+06         | 1.03.E+07         | 1.08.E+07         | 1.18.E+07         | 1.05.E+07            | 1.30.E+07            | 1.06.E+07            | 1.14.E+07            | 1.10.E+07            | 1.49.E+07            | 1.59.E+07            | 1.41.E+07            |
| 2358 | Q9Y2U8    | inner nuclear membrane protein Man1 [OS=Homo sapiens]                                  | 5.657         |                   | 6.41.E+06         | 5.55.E+06         | 7.41.E+06         | 6.71.E+06            | 6.89.E+06            |                      |                      |                      | 6.62.E+06            | 4.70.E+06            | 7.69.E+06            |
| 2359 | Q6Y1H2    | Very-long-chain (3R)-3-hydroxyacyl-CoA dehydratase 2 [OS=Homo sapiens]                 | 5.626         | 1.21.E+07         | 1.08.E+07         | 1.01.E+07         | 1.20.E+07         | 1.37.E+07            | 1.12.E+07            | 1.03.E+07            | 8.75.E+06            | 9.41.E+06            | 9.27.E+06            | 8.94.E+06            | 8.85.E+06            |
| 2360 | P11908    | ribose-phosphate pyrophosphokinase 2 [OS=Homo sapiens]                                 | 5.599         | 2.90.E+07         | 2.67.E+07         | 2.18.E+07         | 2.35.E+07         | 2.47.E+07            | 2.22.E+07            | 2.31.E+07            | 2.60.E+07            | 2.51.E+07            | 2.09.E+07            | 2.04.E+07            | 2.17.E+07            |
| 2361 | Q9NQ50    | 39S ribosomal protein L40, mitochondrial [OS=Homo sapiens]                             | 5.575         | 2.96.E+07         | 3.43.E+07         | 3.47.E+07         | 2.79.E+07         | 2.40.E+07            | 3.32.E+07            | 2.36.E+07            | 2.94.E+07            | 2.91.E+07            | 2.90.E+07            |                      | 3.31.E+07            |
| 2362 | Q92520    | Protein FAM3C [OS=Homo sapiens]                                                        | 5.558         | 1.57.E+06         | 1.05.E+06         | 1.41.E+06         | 1.41.E+06         | 2.55.E+06            | 2.78.E+06            | 2.99.E+06            | 3.12.E+06            | 7.89.E+05            | 1.06.E+06            | 1.42.E+06            | 1.04.E+06            |
| 2363 | P00846    | ATP synthase subunit A [OS=Homo sapiens]                                               | 5.551         | 1.14.E+08         | 1.22.E+08         | 1.22.E+08         | 1.19.E+08         | 1.16.E+08            | 1.11.E+08            | 1.15.E+08            | 1.22.E+08            | 1.33.E+08            | 1.32.E+08            | 1.25.E+08            | 1.19.E+08            |
| 2364 | Q06265-1  | Exosome complex component RRP45 [OS=Homo sapiens]                                      | 5.546         | 1.97.E+07         | 2.13.E+07         | 1.96.E+07         | 2.32.E+07         | 1.99.E+07            | 2.13.E+07            | 1.97.E+07            | 1.90.E+07            | 2.23.E+07            | 2.23.E+07            | 2.23.E+07            | 2.36.E+07            |
| 2365 | Q9P032    | NADH dehydrogenase [ubiquinone] 1 alpha subcomplex assembly factor 4 [OS=Homo sapiens] | 5.537         | 3.22.E+06         |                   | 3.58.E+06         |                   | 5.32.E+06            | 5.52.E+06            | 5.51.E+06            | 3.44.E+06            | 5.53.E+06            | 4.64.E+06            | 5.52.E+06            | 5.82.E+06            |
| 2366 | O15213    | WD repeat-containing protein 46 [OS=Homo sapiens]                                      | 5.535         |                   |                   |                   |                   |                      |                      |                      |                      |                      |                      |                      |                      |
| 2367 | P50895    | Basal cell adhesion molecule [OS=Homo sapiens]                                         | 5.516         |                   |                   |                   |                   |                      |                      |                      |                      |                      |                      |                      |                      |
| 2368 | O00566    | U3 small nucleolar ribonucleoprotein protein Mpp10 [OS=Homo sapiens]                   | 5.484         | 1.01.E+08         | 1.12.E+08         | 1.06.E+08         | 9.57.E+07         | 8.47.E+07            | 8.09.E+07            | 7.23.E+07            | 7.16.E+07            | 6.95.E+07            | 6.65.E+07            | 6.43.E+07            | 6.41.E+07            |
| 2369 | Q13445    | Transmembrane emp24 domain-containing protein 1 [OS=Homo sapiens]                      | 5.478         | 3.25.E+06         | 4.81.E+06         | 4.39.E+06         | 5.74.E+06         | 4.98.E+06            | 4.60.E+06            | 5.29.E+06            | 5.68.E+06            | 6.48.E+06            | 7.30.E+06            | 6.90.E+06            | 6.30.E+06            |
| 2370 | O14618    | copper chaperone for superoxide dismutase [OS=Homo sapiens]                            | 5.475         | 7.39.E+08         | 8.22.E+08         | 8.23.E+08         | 7.81.E+08         | 1.45.E+09            | 1.50.E+09            | 1.50.E+09            | 1.43.E+09            | 1.30.E+09            | 1.34.E+09            | 1.24.E+09            | 1.21.E+09            |
| 2371 | Q9NUQ7    | Ufm1-specific protease 2 [OS=Homo sapiens]                                             | 5.473         | 1.24.E+07         | 8.45.E+06         | 1.09.E+07         | 1.02.E+07         |                      | 7.94.E+06            | 8.37.E+06            | 8.07.E+06            | 1.05.E+07            | 1.08.E+07            | 1.04.E+07            | 1.17.E+07            |
| 2372 | O43264    | Centromere/kinetochore protein zw10 homolog [OS=Homo sapiens]                          | 5.447         |                   |                   |                   |                   |                      |                      |                      |                      |                      |                      |                      |                      |
| 2373 | Q9Y6Q5-1  | AP-1 complex subunit mu-2 [OS=Homo sapiens]                                            | 5.411         | 3.95.E+06         | 4.36.E+06         | 5.25.E+06         | 6.42.E+06         | 5.00.E+06            | 4.74.E+06            | 5.75.E+06            | 4.91.E+06            | 5.10.E+06            | 9.09.E+06            | 4.01.E+06            | 4.99.E+06            |
| 2374 | Q16563    | Synaptophysin-like protein 1 [OS=Homo sapiens]                                         | 5.409         |                   | 2.54.E+08         |                   |                   |                      |                      |                      |                      |                      |                      |                      |                      |
| 2375 | Q9BU61-1  | NADH dehydrogenase [ubiquinone] 1 alpha subcomplex assembly factor 3 [OS=Homo sapiens] | 5.394         |                   |                   |                   |                   |                      |                      |                      |                      |                      |                      |                      |                      |
| 2376 | P19404    | NADH dehydrogenase [ubiquinone] flavoprotein 2, mitochondrial [OS=Homo sapiens]        | 5.387         | 4.42.E+07         | 3.93.E+07         | 4.36.E+07         | 4.05.E+07         | 3.39.E+07            | 3.76.E+07            | 3.89.E+07            | 3.68.E+07            | 4.69.E+07            | 4.47.E+07            | 4.65.E+07            | 5.09.E+07            |

Supplemental Data 1. List of identified proteins

| No.  | Accession | Description                                                                        | Sum PEP Score | CTRL Abundances_1 | CTRL Abundances_2 | CTRL Abundances_3 | CTRL Abundances_4 | CLDN6-1 Abundances_1 | CLDN6-1 Abundances_2 | CLDN6-1 Abundances_3 | CLDN6-1 Abundances_4 | CLDN6-2 Abundances_1 | CLDN6-2 Abundances_2 | CLDN6-2 Abundances_3 | CLDN6-2 Abundances_4 |
|------|-----------|------------------------------------------------------------------------------------|---------------|-------------------|-------------------|-------------------|-------------------|----------------------|----------------------|----------------------|----------------------|----------------------|----------------------|----------------------|----------------------|
| 2377 | Q6P996-1  | Pyridoxal-dependent decarboxylase domain-containing protein 1 [OS=Homo sapiens]    | 5.365         | 1.34.E+07         | 7.68.E+06         | 6.81.E+06         | 3.62.E+06         | 1.58.E+07            | 5.68.E+06            | 9.72.E+06            |                      | 3.87.E+06            | 2.09.E+06            | 9.30.E+06            | 7.03.E+06            |
| 2378 | Q8TCS8    | Polyribonucleotide nucleotidyltransferase 1, mitochondrial [OS=Homo sapiens]       | 5.361         | 2.20.E+07         | 2.54.E+07         | 2.79.E+07         | 2.73.E+07         | 3.46.E+07            | 3.63.E+07            | 3.35.E+07            | 3.51.E+07            | 3.24.E+07            | 3.91.E+07            | 3.59.E+07            | 3.82.E+07            |
| 2379 | Q8WVC0-1  | RNA polymerase-associated protein LEO1 [OS=Homo sapiens]                           | 5.359         | 7.05.E+06         | 6.44.E+06         | 5.84.E+06         | 6.13.E+06         | 8.37.E+06            | 7.73.E+06            | 6.32.E+06            | 5.98.E+06            | 5.62.E+06            | 4.91.E+06            | 5.93.E+06            | 4.33.E+06            |
| 2380 | Q969E2-1  | Secretory carrier-associated membrane protein 4 [OS=Homo sapiens]                  | 5.354         |                   | 7.62.E+07         | 8.98.E+07         | 6.28.E+07         |                      | 6.48.E+07            | 6.08.E+07            | 6.11.E+07            | 8.54.E+07            | 6.68.E+07            | 5.83.E+07            | 6.15.E+07            |
| 2381 | Q13443    | disintegrin and metalloproteinase domain-containing protein 9 [OS=Homo sapiens]    | 5.29          | 1.05.E+06         | 1.47.E+06         | 1.17.E+06         | 1.08.E+06         | 2.93.E+06            | 2.98.E+06            | 3.43.E+06            | 2.78.E+06            | 2.13.E+06            | 2.39.E+06            | 2.23.E+06            | 1.93.E+06            |
| 2382 | Q9BX95    | Sphingosine-1-phosphate phosphatase 1 [OS=Homo sapiens]                            | 5.285         | 1.83.E+07         | 2.02.E+07         | 2.13.E+07         | 2.19.E+07         | 2.60.E+07            | 2.36.E+07            | 2.60.E+07            | 2.59.E+07            | 1.67.E+07            | 1.74.E+07            | 1.74.E+07            | 1.71.E+07            |
| 2383 | Q32P44    | Echinoderm microtubule-associated protein-like 3 [OS=Homo sapiens]                 | 5.279         | 3.29.E+06         | 4.12.E+06         | 3.99.E+06         | 4.13.E+06         | 3.75.E+06            | 4.58.E+06            | 4.12.E+06            | 3.98.E+06            | 4.83.E+06            | 5.07.E+06            | 5.42.E+06            | 4.48.E+06            |
| 2384 | Q02224    | Centromere-associated protein E [OS=Homo sapiens]                                  | 5.277         | 6.55.E+07         | 6.97.E+07         | 5.82.E+07         | 5.70.E+07         | 7.53.E+07            | 7.01.E+07            | 7.02.E+07            | 7.00.E+07            | 7.75.E+07            | 6.99.E+07            | 6.38.E+07            | 6.65.E+07            |
| 2385 | Q7Z417    | Nuclear fragile X mental retardation-interacting protein 2 [OS=Homo sapiens]       | 5.27          | 7.61.E+06         | 9.88.E+06         |                   | 1.02.E+07         |                      |                      |                      |                      |                      |                      | 5.83.E+06            | 6.28.E+06            |
| 2386 | O95218-1  | Zinc finger Ran-binding domain-containing protein 2 [OS=Homo sapiens]              | 5.256         | 3.52.E+07         | 3.64.E+07         | 3.40.E+07         | 3.35.E+07         | 2.79.E+07            | 2.75.E+07            | 2.75.E+07            | 2.91.E+07            | 3.44.E+07            | 3.12.E+07            | 2.93.E+07            | 2.97.E+07            |
| 2387 | Q8NBF2-1  | NHL repeat-containing protein 2 [OS=Homo sapiens]                                  | 5.241         | 1.15.E+07         | 8.35.E+05         | 5.00.E+06         | 1.18.E+06         | 1.43.E+06            | 2.93.E+06            | 9.80.E+05            | 3.05.E+06            | 6.32.E+05            | 7.77.E+05            | 1.13.E+06            | 7.46.E+05            |
| 2388 | Q8IYS2-1  | Uncharacterized protein KIAA2013 [OS=Homo sapiens]                                 | 5.215         |                   | 6.99.E+05         |                   | 9.74.E+05         | 1.45.E+05            | 1.18.E+06            | 4.46.E+05            |                      | 8.46.E+05            | 5.40.E+05            |                      |                      |
| 2389 | P53779    | mitogen-activated protein kinase 10 [OS=Homo sapiens]                              | 5.212         | 4.75.E+07         | 5.03.E+07         | 5.12.E+07         | 5.73.E+07         | 5.43.E+07            | 5.11.E+07            | 5.58.E+07            | 5.50.E+07            | 4.98.E+07            | 4.68.E+07            | 4.36.E+07            | 4.30.E+07            |
| 2390 | P82673-1  | 28S ribosomal protein S35, mitochondrial [OS=Homo sapiens]                         | 5.21          | 2.05.E+07         | 1.38.E+07         | 1.32.E+07         | 1.68.E+07         | 1.74.E+07            | 1.64.E+07            | 1.62.E+07            | 7.54.E+06            | 1.26.E+07            | 1.35.E+07            | 1.33.E+07            | 1.15.E+07            |
| 2391 | A8MXV4    | nucleoside diphosphate-linked moiety X motif 19 [OS=Homo sapiens]                  | 5.194         | 1.37.E+07         | 9.37.E+06         | 1.03.E+07         | 1.16.E+07         | 4.88.E+06            | 6.05.E+06            |                      | 7.51.E+06            | 1.04.E+07            | 1.13.E+07            | 9.78.E+06            | 7.95.E+06            |
| 2392 | P00395    | Cytochrome c oxidase subunit 1 [OS=Homo sapiens]                                   | 5.192         | 2.00.E+07         | 7.71.E+06         | 3.41.E+06         | 5.86.E+06         | 1.48.E+07            | 8.89.E+06            | 5.16.E+06            | 9.76.E+06            |                      |                      |                      | 4.30.E+05            |
| 2393 | Q8IXH7    | Negative elongation factor C/D [OS=Homo sapiens]                                   | 5.189         | 2.69.E+06         | 1.78.E+06         | 1.78.E+06         |                   |                      |                      | 3.87.E+06            |                      | 1.63.E+06            |                      | 2.17.E+06            |                      |
| 2394 | Q2LD37-1  | Uncharacterized protein KIAA1109 [OS=Homo sapiens]                                 | 5.18          | 1.36.E+07         | 1.50.E+07         | 1.30.E+07         | 1.59.E+07         | 1.88.E+07            | 1.65.E+07            | 1.72.E+07            | 1.73.E+07            | 1.91.E+07            | 1.55.E+07            | 1.62.E+07            | 1.60.E+07            |
| 2395 | O95834-3  | Isoform 3 of Echinoderm microtubule-associated protein-like 2 [OS=Homo sapiens]    | 5.146         |                   |                   |                   | 1.19.E+07         | 2.71.E+07            | 1.90.E+07            | 2.37.E+07            | 2.45.E+07            | 2.43.E+07            | 1.29.E+07            | 1.17.E+07            | 6.50.E+06            |
| 2396 | Q9UI26    | Importin-11 [OS=Homo sapiens]                                                      | 5.092         | 3.62.E+06         |                   |                   |                   | 3.39.E+06            |                      |                      |                      |                      |                      |                      |                      |
| 2397 | Q86TG7-1  | Retrotransposon-derived protein PEG10 [OS=Homo sapiens]                            | 5.056         | 7.84.E+06         | 7.55.E+06         | 5.87.E+06         | 1.05.E+07         | 7.31.E+06            | 7.99.E+06            | 9.60.E+06            | 8.02.E+06            | 1.38.E+07            | 9.20.E+06            | 8.78.E+06            | 1.50.E+07            |
| 2398 | P53365    | Arfaptin-2 [OS=Homo sapiens]                                                       | 5.039         | 2.90.E+07         | 3.31.E+07         | 2.86.E+07         | 2.92.E+07         | 2.38.E+07            | 2.31.E+07            | 2.53.E+07            | 2.54.E+07            | 2.89.E+07            | 3.00.E+07            | 2.96.E+07            | 2.62.E+07            |
| 2399 | Q9Y224    | Tyrosine--tRNA ligase, mitochondrial [OS=Homo sapiens]                             | 5.033         | 7.66.E+06         | 6.39.E+06         | 6.74.E+06         | 1.07.E+07         | 6.21.E+06            | 7.28.E+06            | 7.94.E+06            | 4.91.E+06            | 7.30.E+06            | 8.36.E+06            | 5.98.E+06            | 6.49.E+06            |
| 2400 | P56556    | NADH dehydrogenase [ubiquinone] 1 alpha subcomplex subunit 6 [OS=Homo sapiens]     | 5.023         | 1.47.E+07         | 1.72.E+07         | 1.85.E+07         | 2.14.E+07         | 1.65.E+07            | 1.86.E+07            | 1.76.E+07            | 1.88.E+07            | 1.74.E+07            | 1.78.E+07            | 1.82.E+07            | 1.76.E+07            |
| 2401 | P30825    | High affinity cationic amino acid transporter 1 [OS=Homo sapiens]                  | 5.022         | 6.74.E+06         | 7.52.E+06         | 7.68.E+06         | 6.14.E+06         | 4.12.E+06            | 4.46.E+06            | 4.82.E+06            | 6.51.E+06            | 5.69.E+06            | 5.57.E+06            | 5.96.E+06            | 5.92.E+06            |
| 2402 | P04424    | argininosuccinate lyase [OS=Homo sapiens]                                          | 5.022         | 2.90.E+07         | 3.89.E+07         | 4.55.E+07         | 3.96.E+07         | 5.17.E+07            | 7.08.E+07            | 6.01.E+07            | 6.34.E+07            | 4.62.E+07            | 6.46.E+07            | 5.64.E+07            | 5.61.E+07            |
| 2403 | Q92572    | AP-3 complex subunit sigma-1 [OS=Homo sapiens]                                     | 5.014         |                   |                   |                   |                   |                      |                      |                      |                      |                      |                      |                      |                      |
| 2404 | Q9H0H5    | Rac GTPase-activating protein 1 [OS=Homo sapiens]                                  | 4.989         | 1.20.E+07         | 1.55.E+07         | 1.48.E+07         | 1.51.E+07         | 1.83.E+07            | 1.89.E+07            | 1.89.E+07            | 1.71.E+07            | 2.65.E+07            | 2.40.E+07            | 2.51.E+07            | 2.33.E+07            |
| 2405 | Q9UGN5-1  | Poly [ADP-ribose] polymerase 2 [OS=Homo sapiens]                                   | 4.969         | 8.92.E+06         | 8.23.E+06         | 9.65.E+06         |                   | 7.31.E+06            | 9.27.E+06            | 6.47.E+06            | 5.80.E+06            | 6.39.E+06            |                      | 6.15.E+06            | 4.10.E+06            |
| 2406 | Q9H098    | Protein FAM107B [OS=Homo sapiens]                                                  | 4.965         |                   |                   |                   |                   |                      |                      |                      |                      |                      |                      |                      |                      |
| 2407 | Q8TCC3    | 39S ribosomal protein L30, mitochondrial [OS=Homo sapiens]                         | 4.961         | 6.78.E+06         | 8.05.E+06         | 7.39.E+06         | 8.35.E+06         | 7.25.E+06            | 7.56.E+06            | 8.36.E+06            | 8.57.E+06            | 8.56.E+06            | 8.97.E+06            | 7.86.E+06            | 8.11.E+06            |
| 2408 | P17568    | NADH dehydrogenase [ubiquinone] 1 beta subcomplex subunit 7 [OS=Homo sapiens]      | 4.926         | 1.49.E+07         | 1.56.E+07         | 1.66.E+07         | 1.87.E+07         | 1.87.E+07            | 2.01.E+07            | 1.96.E+07            | 1.93.E+07            | 1.62.E+07            | 1.57.E+07            | 1.60.E+07            | 1.46.E+07            |
| 2409 | Q9Y3A3    | MOB-like protein phocein [OS=Homo sapiens]                                         | 4.925         | 1.40.E+07         | 1.15.E+07         | 9.36.E+06         | 1.12.E+07         | 1.30.E+07            | 9.22.E+06            | 8.15.E+06            | 8.87.E+06            | 1.00.E+07            | 8.30.E+06            | 7.52.E+06            | 9.15.E+06            |
| 2410 | P61927    | 60S ribosomal protein L37 [OS=Homo sapiens]                                        | 4.911         | 1.87.E+07         | 1.79.E+07         | 1.79.E+07         | 2.02.E+07         | 2.39.E+07            | 2.68.E+07            | 2.49.E+07            | 2.19.E+07            | 1.58.E+07            | 1.70.E+07            | 1.52.E+07            | 1.49.E+07            |
| 2411 | Q15738    | sterol-4-alpha-carboxylate 3-dehydrogenase, decarboxylating [OS=Homo sapiens]      | 4.91          | 5.66.E+06         | 2.61.E+06         | 6.78.E+06         | 2.47.E+06         | 2.11.E+06            | 2.77.E+06            | 1.78.E+06            | 2.79.E+06            | 5.38.E+06            | 3.04.E+06            | 7.13.E+06            | 4.07.E+06            |
| 2412 | Q96SU4    | Oxysterol-binding protein-related protein 9 [OS=Homo sapiens]                      | 4.903         | 1.92.E+07         | 1.80.E+07         | 2.03.E+07         | 1.81.E+07         | 2.31.E+07            | 2.44.E+07            | 2.32.E+07            | 2.54.E+07            | 2.33.E+07            | 2.60.E+07            | 2.69.E+07            | 2.90.E+07            |
| 2413 | Q9UGP8    | Translocation protein SEC63 homolog [OS=Homo sapiens]                              | 4.896         |                   | 5.79.E+06         |                   | 5.96.E+06         | 7.40.E+06            | 1.05.E+07            | 1.84.E+07            | 8.41.E+06            | 8.84.E+06            | 1.23.E+07            | 1.01.E+07            | 1.05.E+07            |
| 2414 | P36969    | Phospholipid hydroperoxide glutathione peroxidase, mitochondrial [OS=Homo sapiens] | 4.888         |                   |                   |                   |                   |                      |                      |                      |                      |                      |                      |                      |                      |
| 2415 | Q9HA64    | Ketosamine-3-kinase [OS=Homo sapiens]                                              | 4.88          | 4.73.E+07         | 4.33.E+07         | 4.31.E+07         | 4.76.E+07         | 6.02.E+07            | 6.02.E+07            | 6.15.E+07            | 6.29.E+07            | 4.26.E+07            | 3.94.E+07            | 4.11.E+07            | 4.03.E+07            |
| 2416 | Q9UH16    | Probable ATP-dependent RNA helicase DDX20 [OS=Homo sapiens]                        | 4.865         | 1.07.E+07         | 7.38.E+06         | 5.92.E+06         | 7.95.E+06         | 6.93.E+06            | 6.45.E+06            | 6.65.E+06            | 5.97.E+06            | 6.85.E+06            | 7.37.E+06            | 3.65.E+06            | 7.91.E+06            |
| 2417 | P82909    | 28S ribosomal protein S36, mitochondrial [OS=Homo sapiens]                         | 4.861         | 7.77.E+06         |                   |                   | 1.07.E+07         | 1.01.E+07            | 1.12.E+07            | 1.17.E+07            | 9.35.E+06            | 8.36.E+06            | 8.12.E+06            | 7.09.E+06            | 7.81.E+06            |
| 2418 | Q9UJW0-1  | Dynactin subunit 4 [OS=Homo sapiens]                                               | 4.859         | 1.17.E+07         | 1.20.E+07         | 1.27.E+07         | 1.59.E+07         | 1.16.E+07            | 1.14.E+07            | 1.35.E+07            | 1.18.E+07            | 1.06.E+07            | 1.24.E+07            | 1.35.E+07            | 1.63.E+07            |
| 2419 | Q96EY4    | translation machinery-associated protein 16 [OS=Homo sapiens]                      | 4.83          | 1.02.E+07         | 8.94.E+06         | 6.26.E+06         | 6.73.E+06         | 1.06.E+07            | 8.57.E+06            | 8.91.E+06            | 1.04.E+07            | 1.66.E+07            | 1.15.E+07            | 1.37.E+07            | 1.18.E+07            |
| 2420 | Q00535    | Cyclin-dependent-like kinase 5 [OS=Homo sapiens]                                   | 4.82          | 9.64.E+06         | 9.07.E+06         | 9.02.E+06         | 9.74.E+06         | 7.84.E+06            | 7.03.E+06            | 7.72.E+06            | 8.46.E+06            | 6.29.E+06            | 5.81.E+06            | 6.98.E+06            | 7.15.E+06            |
| 2421 | Q9Y3E0    | vesicle transport protein GOT1B [OS=Homo sapiens]                                  | 4.808         | 1.66.E+07         | 1.05.E+07         | 1.13.E+07         | 2.54.E+07         | 9.11.E+06            | 9.82.E+06            | 1.99.E+07            | 4.35.E+06            | 1.15.E+07            | 1.63.E+07            | 1.24.E+07            | 1.81.E+06            |
| 2422 | Q15061    | WD repeat-containing protein 43 [OS=Homo sapiens]                                  | 4.806         | 2.02.E+07         | 4.42.E+07         | 4.28.E+07         | 4.44.E+07         | 4.00.E+07            | 3.79.E+07            | 3.55.E+07            | 3.72.E+07            | 4.88.E+07            | 3.64.E+07            | 3.80.E+07            | 3.60.E+07            |
| 2423 | Q9H2M9    | Rab3 GTPase-activating protein non-catalytic subunit [OS=Homo sapiens]             | 4.779         | 2.17.E+07         | 6.36.E+06         | 9.39.E+06         | 1.79.E+07         | 1.76.E+07            | 9.23.E+06            | 8.04.E+06            | 4.61.E+06            | 2.02.E+07            | 6.11.E+06            | 6.59.E+06            | 5.94.E+06            |
| 2424 | Q96ME1    | F-box/LRR-repeat protein 18 [OS=Homo sapiens]                                      | 4.777         | 3.04.E+06         | 3.18.E+06         | 3.17.E+06         | 3.63.E+06         | 3.02.E+06            | 2.99.E+06            | 3.24.E+06            | 3.07.E+06            | 3.91.E+06            | 3.54.E+06            | 3.63.E+06            | 3.53.E+06            |
| 2425 | Q8ND56    | protein LSM14 homolog A [OS=Homo sapiens]                                          | 4.767         | 1.46.E+07         | 1.66.E+07         | 1.64.E+07         | 1.53.E+07         | 1.30.E+07            | 1.42.E+07            | 1.48.E+07            | 1.26.E+07            | 1.46.E+07            | 1.41.E+07            | 1.66.E+07            | 1.53.E+07            |
| 2426 | Q53EU6    | Glycerol-3-phosphate acyltransferase 3 [OS=Homo sapiens]                           | 4.766         | 7.44.E+07         | 8.06.E+07         | 9.05.E+07         | 8.67.E+07         | 1.07.E+08            | 1.23.E+08            | 1.24.E+08            | 1.19.E+08            | 9.07.E+07            | 1.13.E+08            | 1.11.E+08            | 1.11.E+08            |
| 2427 | Q9NYK5-1  | 39S ribosomal protein L39, mitochondrial [OS=Homo sapiens]                         | 4.759         |                   |                   |                   |                   |                      |                      |                      |                      |                      |                      |                      |                      |

Supplemental Data 1. List of identified proteins

| No.  | Accession | Description                                                                      | Sum PEP Score | CTRL Abundances_1 | CTRL Abundances_2 | CTRL Abundances_3 | CTRL Abundances_4 | CLDN6-1 Abundances_1 | CLDN6-1 Abundances_2 | CLDN6-1 Abundances_3 | CLDN6-1 Abundances_4 | CLDN6-2 Abundances_1 | CLDN6-2 Abundances_2 | CLDN6-2 Abundances_3 | CLDN6-2 Abundances_4 |
|------|-----------|----------------------------------------------------------------------------------|---------------|-------------------|-------------------|-------------------|-------------------|----------------------|----------------------|----------------------|----------------------|----------------------|----------------------|----------------------|----------------------|
| 2428 | Q16775-1  | Hydroxyacylglutathione hydrolase, mitochondrial [OS=Homo sapiens]                | 4.755         | 1.90.E+07         | 2.24.E+07         | 2.13.E+07         | 2.26.E+07         | 1.80.E+07            | 2.23.E+07            | 2.33.E+07            | 2.30.E+07            | 2.01.E+07            | 2.38.E+07            | 2.47.E+07            | 2.47.E+07            |
| 2429 | Q9UEU0    | vesicle transport through interaction with t-SNAREs homolog 1B [OS=Homo sapiens] | 4.731         | 1.51.E+07         | 1.56.E+07         | 1.13.E+07         | 1.59.E+07         | 1.03.E+07            | 7.94.E+06            | 1.01.E+07            | 7.68.E+06            | 6.35.E+06            | 6.08.E+06            | 5.96.E+06            | 5.74.E+06            |
| 2430 | Q9BQB6-1  | vitamin K epoxide reductase complex subunit 1 [OS=Homo sapiens]                  | 4.723         | 5.60.E+07         | 5.75.E+07         | 7.14.E+07         | 6.18.E+07         | 6.58.E+07            | 7.55.E+07            | 7.31.E+07            | 7.17.E+07            | 5.55.E+07            | 7.84.E+07            | 7.06.E+07            | 7.11.E+07            |
| 2431 | O75438    | NADH dehydrogenase [ubiquinone] 1 beta subcomplex subunit 1 [OS=Homo sapiens]    | 4.721         | 6.01.E+07         | 6.13.E+07         | 7.28.E+07         | 6.07.E+07         | 5.31.E+07            | 5.66.E+07            | 6.47.E+07            | 5.90.E+07            | 6.13.E+07            | 5.88.E+07            | 5.21.E+07            | 5.59.E+07            |
| 2432 | Q8WXC6-2  | COP9 signalosome complex subunit 9 [OS=Homo sapiens]                             | 4.708         | 1.69.E+07         | 1.12.E+07         | 1.20.E+07         | 1.56.E+07         | 1.55.E+07            | 1.40.E+07            | 1.37.E+07            | 1.01.E+07            | 1.01.E+07            | 9.70.E+06            | 1.05.E+07            | 9.59.E+06            |
| 2433 | Q9NV06    | DDb1- and CUL4-associated factor 13 [OS=Homo sapiens]                            | 4.704         | 8.38.E+06         | 9.82.E+06         | 1.23.E+07         | 1.04.E+07         | 1.12.E+07            | 7.83.E+06            | 8.20.E+06            | 7.66.E+06            | 7.86.E+06            | 7.71.E+06            | 5.48.E+06            | 5.48.E+06            |
| 2434 | Q99661-1  | Kinesin-like protein KIF2C [OS=Homo sapiens]                                     | 4.697         | 1.10.E+06         | 5.36.E+06         | 4.70.E+06         | 4.09.E+06         | 2.63.E+06            | 6.01.E+06            | 3.81.E+06            | 2.22.E+06            | 2.65.E+06            | 5.35.E+06            | 2.28.E+06            | 6.08.E+06            |
| 2435 | Q9UNN5-1  | fas-associated factor 1 [OS=Homo sapiens]                                        | 4.695         | 1.23.E+07         | 9.84.E+06         | 1.12.E+07         | 9.08.E+06         | 1.20.E+07            | 1.15.E+07            | 1.23.E+07            | 1.04.E+07            | 1.26.E+07            | 7.16.E+07            | 1.15.E+07            | 1.11.E+07            |
| 2436 | P24928    | DNA-directed RNA polymerase II subunit RPB1 [OS=Homo sapiens]                    | 4.692         | 6.28.E+06         | 7.77.E+06         | 8.22.E+06         | 7.59.E+06         | 7.31.E+06            | 8.56.E+06            | 7.79.E+06            | 9.02.E+06            | 4.91.E+06            | 7.10.E+06            | 5.91.E+06            | 5.92.E+06            |
| 2437 | Q70EL2-1  | Ubiquitin carboxyl-terminal hydrolase 45 [OS=Homo sapiens]                       | 4.683         | 9.34.E+06         | 8.81.E+06         | 8.72.E+06         | 1.14.E+07         | 1.01.E+07            | 1.01.E+07            | 9.35.E+06            | 8.51.E+06            | 9.69.E+06            | 8.42.E+06            | 8.61.E+06            | 7.39.E+06            |
| 2438 | Q96KP1    | exocyst complex component 2 [OS=Homo sapiens]                                    | 4.672         |                   |                   |                   |                   | 2.84.E+07            |                      |                      | 4.50.E+06            |                      |                      |                      |                      |
| 2439 | Q6UWP7-1  | Lysocardiolipin acyltransferase 1 [OS=Homo sapiens]                              | 4.67          | 8.99.E+06         | 9.52.E+06         | 9.44.E+06         | 1.26.E+07         | 1.14.E+07            | 1.16.E+07            | 1.17.E+07            | 1.14.E+07            | 1.31.E+07            | 1.29.E+07            | 1.21.E+07            | 1.07.E+07            |
| 2440 | P20962    | Parathyroid hormone-related protein [OS=Homo sapiens]                            | 4.669         |                   |                   |                   |                   |                      |                      |                      |                      |                      |                      |                      |                      |
| 2441 | Q99643    | Succinate dehydrogenase cytochrome b560 subunit, mitochondrial [OS=Homo sapiens] | 4.66          | 4.42.E+07         | 3.04.E+07         | 3.05.E+07         | 3.57.E+07         | 4.86.E+07            | 4.70.E+07            | 4.70.E+07            | 4.01.E+07            | 4.09.E+07            | 4.32.E+07            | 4.46.E+07            | 4.33.E+07            |
| 2442 | P04150    | Glucocorticoid receptor [OS=Homo sapiens]                                        | 4.642         | 3.88.E+06         |                   | 1.09.E+06         | 3.81.E+06         | 2.67.E+06            | 2.40.E+06            | 3.86.E+06            |                      | 2.25.E+06            | 3.79.E+06            | 2.98.E+06            |                      |
| 2443 | Q7Z4Q2    | HEAT repeat-containing protein 3 [OS=Homo sapiens]                               | 4.633         | 2.78.E+07         | 2.73.E+07         | 2.74.E+07         | 3.50.E+07         | 2.18.E+07            | 4.39.E+06            | 2.26.E+07            | 3.09.E+07            | 3.96.E+06            | 2.60.E+07            | 3.93.E+06            | 1.44.E+07            |
| 2444 | Q9UNX4    | WD repeat-containing protein 3 [OS=Homo sapiens]                                 | 4.593         | 1.21.E+07         | 1.16.E+07         | 1.18.E+07         | 9.80.E+06         | 9.43.E+06            | 8.92.E+06            | 1.02.E+07            | 9.65.E+06            | 9.85.E+06            | 8.39.E+06            | 1.16.E+07            | 1.03.E+07            |
| 2445 | Q9H2H9    | Sodium-coupled neutral amino acid transporter 1 [OS=Homo sapiens]                | 4.576         |                   | 4.63.E+06         | 4.65.E+06         | 4.93.E+06         | 3.91.E+06            | 4.18.E+06            | 5.36.E+06            | 4.69.E+06            |                      | 3.42.E+05            |                      | 1.19.E+06            |
| 2446 | Q9Y580    | RNA-binding protein 7 [OS=Homo sapiens]                                          | 4.572         | 8.78.E+06         | 7.61.E+06         | 7.91.E+06         | 1.11.E+07         | 8.18.E+06            | 8.68.E+06            | 7.73.E+06            | 8.39.E+06            | 7.60.E+06            | 7.32.E+06            | 6.73.E+06            | 6.45.E+06            |
| 2447 | Q92665    | 28S ribosomal protein S31, mitochondrial [OS=Homo sapiens]                       | 4.571         |                   |                   |                   |                   |                      |                      |                      |                      |                      |                      |                      |                      |
| 2448 | P55196-4  | Afadin [OS=Homo sapiens]                                                         | 4.562         | 5.43.E+06         |                   | 2.11.E+06         | 3.58.E+06         | 4.06.E+06            | 2.40.E+06            | 3.60.E+06            | 4.20.E+06            | 4.75.E+06            | 4.11.E+06            | 4.23.E+06            | 4.87.E+06            |
| 2449 | P00167-1  | Cytochrome b5 [OS=Homo sapiens]                                                  | 4.541         | 1.49.E+07         | 1.70.E+07         | 1.80.E+07         | 1.59.E+07         | 1.86.E+07            | 1.92.E+07            | 1.69.E+07            | 1.74.E+07            | 1.31.E+07            | 1.58.E+07            | 1.66.E+07            | 1.46.E+07            |
| 2450 | Q96G21    | U3 small nucleolar ribonucleoprotein protein IMP4 [OS=Homo sapiens]              | 4.523         | 4.22.E+06         | 4.41.E+06         | 4.01.E+06         | 5.41.E+06         | 5.07.E+06            | 5.70.E+06            | 5.63.E+06            | 4.86.E+06            | 3.89.E+06            | 3.69.E+06            | 3.55.E+06            | 3.79.E+06            |
| 2451 | Q99615-1  | DnaJ homolog subfamily C member 7 [OS=Homo sapiens]                              | 4.521         | 4.17.E+06         | 4.05.E+06         | 4.93.E+06         | 6.02.E+06         | 2.03.E+06            |                      | 2.89.E+06            | 2.14.E+06            | 2.49.E+06            | 3.67.E+06            | 3.63.E+06            | 3.17.E+06            |
| 2452 | O15116    | U6 snRNA-associated Sm-like protein LSm1 [OS=Homo sapiens]                       | 4.519         | 3.51.E+08         | 3.57.E+08         | 3.36.E+08         | 3.25.E+08         | 2.99.E+08            | 2.86.E+08            | 2.90.E+08            | 3.04.E+08            | 3.39.E+08            | 3.03.E+08            | 3.14.E+08            | 3.20.E+08            |
| 2453 | Q9P0M9    | 39S ribosomal protein L27, mitochondrial [OS=Homo sapiens]                       | 4.514         | 2.87.E+07         | 2.81.E+07         | 2.80.E+07         | 3.25.E+07         | 3.75.E+07            | 3.34.E+07            | 3.53.E+07            | 3.39.E+07            | 2.62.E+07            | 2.34.E+07            | 2.39.E+07            | 2.24.E+07            |
| 2454 | Q16763    | ubiquitin-conjugating enzyme E2 S [OS=Homo sapiens]                              | 4.477         | 2.38.E+07         | 1.29.E+07         |                   | 2.60.E+07         |                      |                      | 1.11.E+07            | 1.43.E+07            |                      |                      |                      |                      |
| 2455 | O95319-1  | CUGBP Elav-like family member 2 [OS=Homo sapiens]                                | 4.456         | 4.13.E+07         | 4.01.E+07         | 4.13.E+07         | 3.98.E+07         | 3.33.E+07            | 3.39.E+07            | 3.68.E+07            | 3.35.E+07            | 3.96.E+07            | 4.00.E+07            | 3.65.E+07            | 3.50.E+07            |
| 2456 | Q16850-1  | lanosterol 14-alpha demethylase [OS=Homo sapiens]                                | 4.442         | 6.86.E+06         | 5.92.E+06         | 6.20.E+06         |                   | 9.73.E+06            | 1.92.E+06            |                      |                      | 5.16.E+06            |                      | 5.41.E+06            | 4.32.E+05            |
| 2457 | Q9H0W8    | protein SMG9 [OS=Homo sapiens]                                                   | 4.441         | 6.07.E+06         | 6.21.E+06         | 7.16.E+06         | 4.33.E+06         | 6.99.E+06            | 6.48.E+06            | 6.81.E+06            | 7.79.E+06            | 6.69.E+06            | 4.54.E+06            | 6.51.E+06            | 4.75.E+06            |
| 2458 | Q96RT1    | Erbin [OS=Homo sapiens]                                                          | 4.432         | 1.04.E+07         | 1.02.E+07         | 1.11.E+07         | 1.29.E+07         | 1.27.E+07            | 1.25.E+07            | 1.12.E+07            | 1.32.E+07            | 1.28.E+07            | 1.30.E+07            | 1.01.E+07            | 1.21.E+07            |
| 2459 | Q07817-1  | bcl-2-like protein 1 [OS=Homo sapiens]                                           | 4.382         | 1.25.E+07         | 1.19.E+07         | 1.30.E+07         | 1.53.E+07         | 1.34.E+07            | 1.41.E+07            | 1.46.E+07            | 1.37.E+07            | 1.45.E+07            | 1.26.E+07            | 1.48.E+07            | 1.45.E+07            |
| 2460 | Q92604    | Acyl-CoA:lysophosphatidylglycerol acyltransferase 1 [OS=Homo sapiens]            | 4.36          |                   |                   |                   |                   |                      |                      |                      |                      |                      |                      |                      |                      |
| 2461 | Q9P2M7-1  | cingulin [OS=Homo sapiens]                                                       | 4.36          | 1.14.E+07         | 6.85.E+06         |                   |                   |                      |                      | 3.41.E+06            | 3.80.E+06            | 5.55.E+06            | 6.07.E+06            | 7.27.E+06            |                      |
| 2462 | Q9UH99    | SUN domain-containing protein 2 [OS=Homo sapiens]                                | 4.338         | 7.76.E+06         |                   | 1.96.E+07         | 5.95.E+06         |                      |                      | 3.97.E+05            |                      | 3.04.E+05            | 1.44.E+06            |                      | 4.15.E+05            |
| 2463 | Q12959    | Disks large homolog 1 [OS=Homo sapiens]                                          | 4.302         | 1.63.E+07         | 1.84.E+07         | 1.79.E+07         | 1.70.E+07         | 1.56.E+07            | 1.45.E+07            | 1.77.E+07            | 1.64.E+07            | 2.11.E+07            | 1.49.E+07            | 1.66.E+07            | 1.61.E+07            |
| 2464 | Q06078    | protein arginine N-methyltransferase 3 [OS=Homo sapiens]                         | 4.292         | 6.55.E+06         | 5.45.E+06         | 5.79.E+06         | 6.51.E+06         | 5.01.E+06            | 3.47.E+06            | 4.37.E+06            | 2.62.E+06            | 4.79.E+06            | 3.98.E+06            | 4.41.E+06            | 4.19.E+06            |
| 2465 | Q96Q11-1  | CCA tRNA nucleotidyltransferase 1, mitochondrial [OS=Homo sapiens]               | 4.282         | 1.09.E+07         | 8.31.E+06         | 8.61.E+06         | 8.85.E+06         | 9.38.E+06            | 9.69.E+06            | 9.71.E+06            | 6.40.E+06            | 7.03.E+06            | 7.02.E+06            | 7.70.E+06            | 6.53.E+06            |
| 2466 | Q8N7Z5    | Putative ankyrin repeat domain-containing protein 31 [OS=Homo sapiens]           | 4.28          |                   |                   |                   |                   |                      |                      |                      |                      |                      |                      |                      |                      |
| 2467 | O00762    | Ubiquitin-conjugating enzyme E2 C [OS=Homo sapiens]                              | 4.277         | 3.06.E+07         | 3.60.E+07         | 2.69.E+07         | 3.55.E+07         | 2.68.E+07            | 2.61.E+07            | 2.49.E+07            | 2.41.E+07            | 4.26.E+07            | 4.01.E+07            | 3.96.E+07            | 4.63.E+07            |
| 2468 | Q9BTC0    | Death-inducer obliterator 1 [OS=Homo sapiens]                                    | 4.269         | 6.84.E+06         | 6.17.E+06         | 7.17.E+06         | 6.98.E+06         | 6.85.E+06            | 8.29.E+06            | 7.89.E+06            | 6.65.E+06            | 5.88.E+06            | 6.52.E+06            | 6.76.E+06            | 8.01.E+06            |
| 2469 | Q99417    | C-Myc-binding protein [OS=Homo sapiens]                                          | 4.239         | 1.10.E+07         | 1.76.E+07         | 1.64.E+07         | 1.47.E+07         | 1.97.E+07            | 1.89.E+07            | 1.89.E+07            | 1.89.E+07            | 1.81.E+07            | 1.53.E+07            | 1.72.E+07            | 1.60.E+07            |
| 2470 | Q9UPT8    | Zinc finger CCH domain-containing protein 4 [OS=Homo sapiens]                    | 4.231         | 9.77.E+06         | 6.17.E+06         | 7.77.E+06         | 1.16.E+07         | 9.13.E+06            | 1.02.E+07            | 1.11.E+07            | 7.50.E+06            | 7.87.E+06            | 7.76.E+06            | 9.39.E+06            | 8.78.E+06            |
| 2471 | Q7L9L4    | mob kinase activator 1b [OS=Homo sapiens]                                        | 4.217         | 1.87.E+07         | 2.12.E+07         | 2.20.E+07         | 2.11.E+07         | 1.88.E+07            | 2.28.E+07            | 3.12.E+07            | 2.22.E+07            | 1.74.E+07            | 2.28.E+07            |                      | 2.19.E+07            |
| 2472 | O15235    | 28S ribosomal protein S12, mitochondrial [OS=Homo sapiens]                       | 4.209         | 4.86.E+06         | 5.56.E+06         | 5.50.E+06         | 6.54.E+06         | 5.88.E+06            | 6.25.E+06            | 6.28.E+06            | 6.53.E+06            | 5.21.E+06            | 5.00.E+06            | 5.36.E+06            | 5.39.E+06            |
| 2473 | O96019-1  | Actin-like protein 6A [OS=Homo sapiens]                                          | 4.208         | 4.23.E+06         | 4.32.E+06         | 3.88.E+06         | 5.47.E+06         | 1.20.E+07            | 6.36.E+06            | 1.47.E+07            | 1.28.E+07            | 5.80.E+06            | 4.53.E+06            | 4.88.E+06            | 4.34.E+06            |
| 2474 | P02765    | Alpha-2-HS-glycoprotein [OS=Homo sapiens]                                        | 4.199         | 4.16.E+06         | 4.33.E+06         | 4.12.E+06         | 4.89.E+06         | 3.92.E+06            | 3.91.E+06            | 3.84.E+06            | 3.43.E+06            | 3.08.E+06            | 2.92.E+06            | 2.49.E+06            | 2.45.E+06            |
| 2475 | Q9NWW4    | Histone PARylation factor 1 [OS=Homo sapiens]                                    | 4.194         | 1.08.E+07         | 4.80.E+06         | 6.30.E+06         | 9.78.E+06         | 8.66.E+06            | 7.50.E+06            | 8.92.E+06            | 6.43.E+06            | 6.65.E+06            | 6.81.E+06            | 5.60.E+06            | 5.52.E+06            |
| 2476 | Q14353-1  | guanidinoacetate N-methyltransferase [OS=Homo sapiens]                           | 4.183         | 5.51.E+07         |                   |                   |                   |                      | 3.26.E+07            |                      |                      | 7.04.E+07            |                      | 3.56.E+07            |                      |
| 2477 | P61421    | V-type proton ATPase subunit d1 [OS=Homo sapiens]                                | 4.174         | 8.12.E+07         | 6.06.E+07         | 4.03.E+07         | 9.09.E+07         | 6.86.E+07            | 1.00.E+08            | 9.81.E+07            | 1.01.E+08            | 9.94.E+07            | 1.15.E+08            | 1.17.E+08            | 1.03.E+08            |
| 2478 | P15954    | Cytochrome c oxidase subunit 7C, mitochondrial [OS=Homo sapiens]                 | 4.165         | 8.89.E+07         | 8.82.E+07         | 8.01.E+07         | 7.96.E+07         | 1.00.E+08            | 8.97.E+07            | 9.26.E+07            | 9.43.E+07            | 7.52.E+07            | 6.94.E+07            | 6.85.E+07            | 7.29.E+07            |
| 2479 | Q15004-1  | PCNA-associated factor [OS=Homo sapiens]                                         | 4.163         | 8.20.E+06         | 9.14.E+06         | 9.87.E+06         | 9.80.E+06         | 9.75.E+06            | 1.05.E+07            | 1.16.E+07            | 1.02.E+07            | 9.41.E+06            | 1.03.E+07            | 1.09.E+07            | 1.05.E+07            |
| 2480 | Q9UII2-1  | ATPase inhibitor, mitochondrial [OS=Homo sapiens]                                | 4.162         | 2.40.E+07         | 2.72.E+07         | 2.85.E+07         | 2.19.E+07         | 1.82.E+07            | 1.79.E+07            | 1.84.E+07            | 1.98.E+07            | 2.08.E+07            | 2.28.E+07            | 2.25.E+07            | 1.47.E+07            |
| 2481 | Q14241    | Elongin-A [OS=Homo sapiens]                                                      | 4.162         | 1.17.E+07         | 3.00.E+06         | 1.18.E+07         | 9.53.E+05         | 8.83.E+06            | 3.49.E+06            | 3.22.E+06            | 3.27.E+06            | 7.45.E+06            | 2.46.E+06            | 2.91.E+06            | 2.90.E+06            |

| No.  | Accession | Description                                                                         | Sum PEP Score | CTRL Abundances_1 | CTRL Abundances_2 | CTRL Abundances_3 | CTRL Abundances_4 | CLDN6-1 Abundances_1 | CLDN6-1 Abundances_2 | CLDN6-1 Abundances_3 | CLDN6-1 Abundances_4 | CLDN6-2 Abundances_1 | CLDN6-2 Abundances_2 | CLDN6-2 Abundances_3 | CLDN6-2 Abundances_4 |
|------|-----------|-------------------------------------------------------------------------------------|---------------|-------------------|-------------------|-------------------|-------------------|----------------------|----------------------|----------------------|----------------------|----------------------|----------------------|----------------------|----------------------|
| 2482 | Q32P41    | tRNA (guanine(37)-N1)-methyltransferase [OS=Homo sapiens]                           | 4.158         | 2.09.E+07         | 2.22.E+07         | 1.80.E+07         | 1.59.E+07         | 1.37.E+07            | 1.12.E+07            | 8.47.E+06            | 1.67.E+07            | 1.98.E+07            | 1.80.E+07            | 2.08.E+07            | 1.65.E+07            |
| 2483 | Q96CN7    | Isochorismatase domain-containing protein 1 [OS=Homo sapiens]                       | 4.154         | 1.60.E+06         | 1.19.E+06         | 2.36.E+06         | 1.53.E+06         | 1.70.E+06            | 1.70.E+06            | 3.07.E+06            | 1.05.E+06            | 1.63.E+06            | 1.80.E+06            | 2.30.E+06            | 1.08.E+06            |
| 2484 | P83111-1  | Serine beta-lactamase-like protein LACTB, mitochondrial [OS=Homo sapiens]           | 4.141         |                   |                   |                   | 4.78.E+06         |                      |                      | 4.46.E+06            | 7.30.E+06            | 9.59.E+06            | 1.15.E+07            | 1.69.E+07            | 1.10.E+07            |
| 2485 | P15291    | Beta-1,4-galactosyltransferase 1 [OS=Homo sapiens]                                  | 4.14          | 4.59.E+07         | 4.83.E+07         | 4.99.E+07         | 4.79.E+07         | 5.37.E+07            | 5.20.E+07            | 5.78.E+07            | 5.61.E+07            | 4.26.E+07            | 4.24.E+07            | 4.20.E+07            | 4.34.E+07            |
| 2486 | Q72739    | YTH domain-containing family protein 3 [OS=Homo sapiens]                            | 4.134         | 3.00.E+07         | 3.51.E+07         | 3.35.E+07         | 2.95.E+07         | 3.03.E+07            | 3.18.E+07            | 3.05.E+07            | 3.26.E+07            | 3.87.E+07            | 3.89.E+07            | 3.72.E+07            | 3.59.E+07            |
| 2487 | Q9H061-1  | Transmembrane protein 126A [OS=Homo sapiens]                                        | 4.118         | 5.86.E+06         | 1.17.E+07         | 6.65.E+06         | 2.06.E+07         | 1.77.E+07            | 2.34.E+07            | 1.55.E+07            | 2.35.E+06            |                      | 8.87.E+06            | 8.89.E+06            | 1.31.E+07            |
| 2488 | Q9Y324    | rRNA-processing protein FCF1 homolog [OS=Homo sapiens]                              | 4.107         | 7.25.E+06         | 1.33.E+07         | 1.23.E+07         | 1.79.E+07         | 1.02.E+07            | 1.35.E+07            | 1.76.E+07            | 1.84.E+07            | 1.00.E+07            | 2.05.E+07            | 1.06.E+07            | 1.98.E+07            |
| 2489 | P57772    | selenocysteine-specific elongation factor [OS=Homo sapiens]                         | 4.095         | 7.71.E+07         | 8.30.E+07         | 7.17.E+07         | 8.43.E+07         | 4.76.E+07            | 7.15.E+07            | 5.75.E+07            | 5.54.E+07            | 1.08.E+08            | 1.03.E+08            | 1.08.E+08            | 1.21.E+08            |
| 2490 | Q9UKS6    | Protein kinase C and casein kinase substrate in neurons protein 3 [OS=Homo sapiens] | 4.071         | 2.20.E+07         | 3.03.E+07         | 3.57.E+07         | 3.06.E+07         | 2.81.E+07            | 3.28.E+07            | 3.14.E+07            | 3.29.E+07            | 1.91.E+07            | 3.60.E+07            | 3.09.E+07            | 3.01.E+07            |
| 2491 | Q13523    | Serine/threonine-protein kinase PRP4 homolog [OS=Homo sapiens]                      | 4.067         | 1.57.E+07         |                   |                   | 3.20.E+07         | 1.74.E+07            | 2.31.E+07            |                      | 1.48.E+07            |                      |                      | 1.93.E+07            |                      |
| 2492 | Q5T8D3-3  | Isoform 3 of Acyl-CoA-binding domain-containing protein 5 [OS=Homo sapiens]         | 4.039         |                   |                   |                   |                   |                      |                      |                      |                      |                      |                      |                      |                      |
| 2493 | P09848    | Lactase-phlorizin hydrolase [OS=Homo sapiens]                                       | 4.03          | 1.41.E+07         | 1.79.E+07         | 1.88.E+07         | 1.67.E+07         | 2.21.E+07            | 2.59.E+07            | 2.70.E+07            | 2.53.E+07            | 2.26.E+07            | 2.55.E+07            | 2.49.E+07            | 2.28.E+07            |
| 2494 | O43823    | A-kinase anchor protein 8 [OS=Homo sapiens]                                         | 4.026         | 3.51.E+06         | 3.57.E+06         | 3.51.E+06         | 4.39.E+06         | 4.82.E+06            | 4.82.E+06            | 7.50.E+04            | 4.46.E+06            | 5.96.E+06            | 4.98.E+06            | 4.53.E+06            | 3.97.E+06            |
| 2495 | Q9Y6D5    | Brefeldin A-inhibited guanine nucleotide-exchange protein 2 [OS=Homo sapiens]       | 4.022         |                   |                   | 1.89.E+07         |                   | 9.83.E+06            | 5.55.E+06            | 1.33.E+07            | 9.17.E+06            | 1.09.E+07            | 1.26.E+07            | 9.61.E+06            | 1.70.E+07            |
| 2496 | Q9Y606    | tRNA pseudouridine synthase A, mitochondrial [OS=Homo sapiens]                      | 4.02          | 2.83.E+06         | 2.47.E+06         | 1.92.E+06         | 3.97.E+06         | 4.85.E+06            | 5.75.E+06            | 4.65.E+06            | 1.38.E+06            | 5.53.E+06            | 5.21.E+06            | 3.07.E+06            | 2.42.E+06            |
| 2497 | Q96SB4-2  | SRSF protein kinase 1 [OS=Homo sapiens]                                             | 3.995         | 1.88.E+07         | 3.98.E+06         | 1.67.E+07         | 2.10.E+07         | 1.12.E+07            | 1.60.E+07            | 1.16.E+07            | 1.63.E+07            | 1.46.E+07            | 1.07.E+07            | 1.67.E+07            | 8.11.E+06            |
| 2498 | O96000    | NADH dehydrogenase [ubiquinone] 1 beta subcomplex subunit 10 [OS=Homo sapiens]      | 3.981         | 1.62.E+08         | 1.63.E+08         | 1.71.E+08         | 1.61.E+08         | 1.44.E+08            | 1.48.E+08            | 1.57.E+08            | 1.57.E+08            | 1.59.E+08            | 1.70.E+08            | 1.81.E+08            | 1.83.E+08            |
| 2499 | Q9H446    | nwd domain-containing protein 1 [OS=Homo sapiens]                                   | 3.924         | 7.97.E+06         | 6.15.E+06         | 3.68.E+06         | 1.22.E+07         | 8.87.E+06            | 7.50.E+06            | 6.44.E+06            | 6.45.E+06            | 7.72.E+06            | 5.23.E+06            | 6.06.E+06            | 6.06.E+06            |
| 2500 | Q96ER3    | protein saal1 [OS=Homo sapiens]                                                     | 3.924         | 1.24.E+07         | 1.60.E+06         | 3.93.E+06         | 3.73.E+06         | 3.74.E+06            | 1.80.E+06            | 3.96.E+06            | 3.55.E+06            | 2.68.E+06            | 2.08.E+06            | 2.06.E+06            | 3.30.E+06            |
| 2501 | Q5T440    | Putative transferase CAF17, mitochondrial [OS=Homo sapiens]                         | 3.906         | 7.11.E+06         | 4.19.E+06         |                   | 3.03.E+06         | 5.61.E+06            |                      | 1.07.E+06            | 2.56.E+06            | 1.24.E+06            |                      | 3.41.E+06            |                      |
| 2502 | Q9ULH0-1  | Kinase D-interacting substrate of 220 kDa [OS=Homo sapiens]                         | 3.888         | 1.04.E+07         | 1.90.E+06         | 7.03.E+06         | 1.17.E+07         | 2.45.E+06            | 5.84.E+06            | 4.32.E+06            | 2.67.E+06            | 7.73.E+06            | 2.71.E+06            | 1.29.E+06            | 1.21.E+06            |
| 2503 | Q9BXB4    | Oxysterol-binding protein-related protein 11 [OS=Homo sapiens]                      | 3.886         | 4.20.E+06         | 3.69.E+06         | 5.94.E+06         | 1.80.E+06         | 4.39.E+06            | 6.64.E+06            | 5.66.E+06            | 4.75.E+06            | 2.36.E+06            | 3.35.E+06            | 5.73.E+06            | 4.12.E+06            |
| 2504 | P80303    | Nucleobindin-2 [OS=Homo sapiens]                                                    | 3.884         | 1.32.E+07         | 1.33.E+07         | 1.16.E+07         | 1.14.E+07         | 1.25.E+07            | 1.20.E+07            | 1.34.E+07            | 1.08.E+07            | 1.62.E+07            | 1.98.E+07            | 1.83.E+07            | 2.00.E+07            |
| 2505 | Q9UPU5    | Ubiquitin carboxyl-terminal hydrolase 24 [OS=Homo sapiens]                          | 3.864         | 5.32.E+06         |                   |                   |                   |                      |                      |                      |                      | 3.13.E+06            |                      |                      | 1.53.E+06            |
| 2506 | Q05D32    | CTD small phosphatase-like protein 2 [OS=Homo sapiens]                              | 3.863         | 1.41.E+07         | 1.59.E+07         | 1.59.E+07         | 1.48.E+07         | 1.20.E+07            | 1.26.E+07            | 1.23.E+07            | 1.19.E+07            | 1.45.E+07            | 1.36.E+07            | 1.57.E+07            | 1.50.E+07            |
| 2507 | P53677    | AP-3 complex subunit mu-2 [OS=Homo sapiens]                                         | 3.861         | 1.61.E+07         | 1.56.E+07         | 1.77.E+07         | 1.69.E+07         | 1.95.E+07            | 1.81.E+07            | 2.01.E+07            | 1.88.E+07            | 1.62.E+07            | 1.52.E+07            | 1.55.E+07            | 1.65.E+07            |
| 2508 | Q2PZ11-1  | Probable C-mannosyltransferase DPY19L1 [OS=Homo sapiens]                            | 3.829         | 4.66.E+06         | 4.83.E+06         | 4.10.E+06         | 3.63.E+06         | 6.55.E+06            | 4.87.E+06            | 9.56.E+06            | 1.12.E+07            | 7.64.E+06            | 7.18.E+06            | 9.64.E+06            | 7.00.E+06            |
| 2509 | Q7KZ85    | transcription elongation factor sp16 [OS=Homo sapiens]                              | 3.82          | 1.62.E+07         | 1.51.E+05         | 1.53.E+07         | 1.50.E+07         | 1.62.E+07            | 1.48.E+07            | 7.63.E+06            | 1.66.E+07            | 1.90.E+07            | 1.64.E+07            | 1.40.E+07            | 1.78.E+07            |
| 2510 | Q9BTE7    | DCN1-like protein 5 [OS=Homo sapiens]                                               | 3.812         |                   |                   |                   |                   |                      |                      |                      |                      |                      |                      |                      |                      |
| 2511 | Q96BR5    | Cytochrome c oxidase assembly factor 7 [OS=Homo sapiens]                            | 3.811         | 1.23.E+07         | 1.12.E+07         | 9.38.E+06         | 1.13.E+07         | 8.77.E+06            | 7.51.E+06            | 8.51.E+06            | 8.29.E+06            | 1.10.E+07            | 1.04.E+07            | 9.73.E+06            | 9.25.E+06            |
| 2512 | P07311    | Acylphosphatase-1 [OS=Homo sapiens]                                                 | 3.811         | 2.16.E+07         | 2.00.E+07         | 2.55.E+07         | 2.19.E+07         | 2.81.E+07            | 2.49.E+07            | 2.86.E+07            | 2.68.E+07            | 3.30.E+07            | 2.94.E+07            | 2.75.E+07            | 2.77.E+07            |
| 2513 | O95563    | Mitochondrial pyruvate carrier 2 [OS=Homo sapiens]                                  | 3.808         | 1.04.E+07         | 1.02.E+07         | 9.80.E+06         | 1.15.E+07         | 1.36.E+07            | 1.13.E+07            | 1.15.E+07            | 1.21.E+07            | 7.38.E+06            | 7.09.E+06            | 6.89.E+06            | 7.85.E+06            |
| 2514 | Q9NQ55-1  | suppressor of SW14 1 homolog [OS=Homo sapiens]                                      | 3.806         |                   |                   |                   |                   |                      |                      |                      |                      |                      |                      |                      |                      |
| 2515 | P49459-1  | Ubiquitin-conjugating enzyme E2 A [OS=Homo sapiens]                                 | 3.784         | 2.46.E+07         | 2.83.E+07         | 2.64.E+07         | 1.82.E+07         | 1.83.E+07            | 1.96.E+07            | 2.18.E+07            | 2.01.E+07            | 2.29.E+07            | 2.47.E+07            | 2.46.E+07            | 2.32.E+07            |
| 2516 | Q9BRJ6    | Uncharacterized protein C7orf50 [OS=Homo sapiens]                                   | 3.758         | 1.23.E+07         | 1.14.E+07         | 1.37.E+07         | 1.18.E+07         | 9.67.E+06            | 1.20.E+07            | 1.20.E+07            | 1.21.E+07            | 8.92.E+06            | 8.55.E+06            | 9.39.E+06            | 7.61.E+06            |
| 2517 | Q9BQC3    | 2-(3-amino-3-carboxypropyl)histidine synthase subunit 2 [OS=Homo sapiens]           | 3.74          | 6.63.E+06         |                   | 3.07.E+05         | 1.40.E+06         | 4.78.E+06            | 4.52.E+06            |                      | 4.77.E+06            | 8.29.E+05            | 3.04.E+06            | 1.63.E+07            | 5.84.E+06            |
| 2518 | P25490    | Transcriptional repressor protein YY1 [OS=Homo sapiens]                             | 3.738         | 4.31.E+07         | 4.58.E+07         | 4.37.E+07         | 4.88.E+07         | 4.61.E+07            | 4.68.E+07            | 4.44.E+07            | 4.05.E+07            | 4.07.E+07            | 4.09.E+07            | 4.39.E+07            | 4.64.E+07            |
| 2519 | P51553-1  | isocitrate dehydrogenase [NAD] subunit gamma, mitochondrial [OS=Homo sapiens]       | 3.738         | 2.24.E+07         | 2.40.E+07         | 3.03.E+07         | 2.70.E+07         | 2.82.E+07            | 3.27.E+07            | 2.93.E+07            | 3.13.E+07            | 2.78.E+07            | 3.78.E+07            | 3.57.E+07            | 3.70.E+07            |
| 2520 | O43815    | striatin [OS=Homo sapiens]                                                          | 3.728         |                   | 1.90.E+05         | 1.35.E+05         |                   | 2.88.E+06            | 1.03.E+06            |                      | 9.33.E+05            | 1.01.E+06            |                      |                      |                      |
| 2521 | Q96T51    | RUN and FYVE domain-containing protein 1 [OS=Homo sapiens]                          | 3.721         |                   |                   |                   |                   |                      |                      |                      |                      |                      |                      |                      |                      |
| 2522 | P30622-3  | CAP-Gly domain-containing linker protein 1 [OS=Homo sapiens]                        | 3.719         | 1.31.E+07         | 1.27.E+07         | 1.27.E+07         | 1.30.E+07         | 1.52.E+07            | 1.58.E+07            | 1.60.E+07            | 1.64.E+07            | 1.04.E+07            | 1.28.E+07            | 1.09.E+07            | 1.01.E+07            |
| 2523 | P60510    | Serine/threonine-protein phosphatase 4 catalytic subunit [OS=Homo sapiens]          | 3.718         | 1.17.E+07         | 7.47.E+06         | 1.67.E+07         | 2.73.E+07         | 7.77.E+06            | 9.95.E+06            | 1.03.E+07            | 8.10.E+06            | 1.18.E+07            | 7.87.E+05            | 1.98.E+07            | 8.51.E+06            |
| 2524 | P17900    | Ganglioside GM2 activator [OS=Homo sapiens]                                         | 3.691         | 1.40.E+07         | 8.70.E+06         | 8.87.E+06         | 7.26.E+06         | 1.20.E+06            | 2.55.E+06            | 4.06.E+06            |                      | 1.02.E+07            | 9.80.E+06            | 4.40.E+06            | 5.64.E+06            |
| 2525 | Q53H82    | Endoribonuclease LACTB2 [OS=Homo sapiens]                                           | 3.665         |                   | 3.30.E+06         | 1.50.E+07         |                   | 3.08.E+06            | 2.64.E+06            | 3.57.E+06            |                      | 5.99.E+06            | 3.83.E+06            | 2.98.E+06            | 4.85.E+06            |
| 2526 | Q9BRT3    | migration and invasion enhancer 1 [OS=Homo sapiens]                                 | 3.65          |                   |                   |                   |                   | 1.80.E+07            | 3.97.E+06            |                      |                      | 2.10.E+07            | 4.21.E+07            | 4.45.E+07            | 4.01.E+07            |
| 2527 | Q8WTS6    | Histone-lysine N-methyltransferase SETD7 [OS=Homo sapiens]                          | 3.636         | 7.27.E+07         | 6.89.E+07         | 6.62.E+07         | 6.78.E+07         | 6.04.E+07            | 6.10.E+07            | 6.45.E+07            | 5.92.E+07            | 7.23.E+07            | 6.71.E+07            | 6.51.E+07            | 6.43.E+07            |
| 2528 | Q14197    | Peptidyl-tRNA hydrolase ICT1, mitochondrial [OS=Homo sapiens]                       | 3.633         | 2.85.E+07         | 3.18.E+07         | 3.25.E+07         | 3.25.E+07         | 3.73.E+07            | 2.89.E+07            | 2.70.E+07            | 2.59.E+07            | 3.54.E+07            | 4.55.E+07            | 3.43.E+07            | 3.42.E+07            |
| 2529 | Q9NQX4    | Unconventional myosin-Vc [OS=Homo sapiens]                                          | 3.63          | 5.96.E+06         | 5.69.E+06         | 6.11.E+06         | 7.04.E+06         | 6.32.E+06            |                      | 6.48.E+06            | 4.22.E+06            | 6.85.E+06            | 7.75.E+06            | 6.97.E+06            | 5.83.E+06            |
| 2530 | Q6P1N9-1  | Putative deoxyribonuclease TATDN1 [OS=Homo sapiens]                                 | 3.623         | 3.20.E+07         | 3.58.E+07         |                   | 3.20.E+07         | 3.28.E+07            | 7.95.E+07            | 8.59.E+07            | 2.85.E+07            | 3.18.E+07            | 3.90.E+07            | 3.95.E+07            | 3.65.E+07            |
| 2531 | O95376    | E3 ubiquitin-protein ligase ARIH2 [OS=Homo sapiens]                                 | 3.592         | 1.80.E+08         | 1.97.E+08         | 2.29.E+08         | 2.11.E+08         | 1.76.E+08            | 2.06.E+08            | 2.02.E+08            | 2.09.E+08            | 1.82.E+08            | 2.40.E+08            | 2.26.E+08            | 2.11.E+08            |
| 2532 | Q8NFU7    | methylcytosine dioxygenase TET1 [OS=Homo sapiens]                                   | 3.59          | 1.74.E+06         | 1.42.E+06         | 1.54.E+06         | 1.74.E+06         | 2.78.E+06            | 2.15.E+06            | 2.35.E+06            | 2.02.E+06            | 1.35.E+06            | 1.21.E+06            | 1.11.E+06            | 1.21.E+06            |
| 2533 | Q15404-1  | Ras suppressor protein 1 [OS=Homo sapiens]                                          | 3.579         | 1.86.E+07         | 2.06.E+07         | 1.95.E+07         | 2.29.E+07         | 2.81.E+07            | 2.66.E+07            | 2.55.E+07            | 2.76.E+07            | 2.05.E+07            | 2.00.E+07            | 2.05.E+07            | 1.95.E+07            |
| 2534 | O95983-1  | methyl-CpG-binding domain protein 3 [OS=Homo sapiens]                               | 3.577         | 1.68.E+06         |                   | 3.97.E+06         | 4.14.E+06         |                      |                      | 1.59.E+06            | 1.56.E+06            | 1.20.E+06            | 5.58.E+06            |                      | 5.82.E+05            |
| 2535 | Q9Y2S6    | Translation machinery-associated protein 7 [OS=Homo sapiens]                        | 3.556         | 9.79.E+06         | 9.68.E+06         | 8.87.E+06         | 9.93.E+06         | 1.25.E+07            | 1.33.E+07            | 1.33.E+07            | 1.23.E+07            | 1.09.E+07            | 9.61.E+06            | 9.82.E+06            | 8.24.E+06            |

Supplemental Data 1. List of identified proteins

| No.  | Accession | Description                                                                               | Sum PEP Score | CTRL Abundances_1 | CTRL Abundances_2 | CTRL Abundances_3 | CTRL Abundances_4 | CLDN6-1 Abundances_1 | CLDN6-1 Abundances_2 | CLDN6-1 Abundances_3 | CLDN6-1 Abundances_4 | CLDN6-2 Abundances_1 | CLDN6-2 Abundances_2 | CLDN6-2 Abundances_3 | CLDN6-2 Abundances_4 |
|------|-----------|-------------------------------------------------------------------------------------------|---------------|-------------------|-------------------|-------------------|-------------------|----------------------|----------------------|----------------------|----------------------|----------------------|----------------------|----------------------|----------------------|
| 2536 | Q5JPH6    | Probable glutamate-tRNA ligase, mitochondrial [OS=Homo sapiens]                           | 3.554         |                   |                   |                   |                   |                      |                      |                      |                      |                      |                      |                      |                      |
| 2537 | Q96T23    | remodeling and spacing factor 1 [OS=Homo sapiens]                                         | 3.542         | 5.25.E+06         | 4.25.E+06         | 5.36.E+06         | 3.55.E+06         | 5.65.E+06            | 1.30.E+07            | 9.50.E+06            | 4.43.E+06            | 4.09.E+06            | 2.80.E+06            | 5.54.E+06            | 3.77.E+06            |
| 2538 | Q676U5    | Autophagy-related protein 16-1 [OS=Homo sapiens]                                          | 3.536         |                   |                   |                   |                   |                      |                      |                      |                      |                      |                      |                      |                      |
| 2539 | Q15345-2  | Leucine-rich repeat-containing protein 41 [OS=Homo sapiens]                               | 3.533         | 2.16.E+06         | 2.47.E+06         | 2.41.E+06         | 2.98.E+06         | 2.86.E+06            |                      | 2.80.E+06            | 2.06.E+06            | 3.04.E+06            | 2.66.E+06            | 3.49.E+06            | 3.25.E+06            |
| 2540 | Q9NVT9    | armadillo repeat-containing protein 1 [OS=Homo sapiens]                                   | 3.521         |                   |                   |                   |                   |                      |                      |                      |                      |                      |                      |                      |                      |
| 2541 | P56381    | ATP synthase subunit epsilon, mitochondrial [OS=Homo sapiens]                             | 3.511         | 6.24.E+07         | 6.20.E+07         | 6.98.E+07         | 7.01.E+07         | 6.67.E+07            | 6.92.E+07            | 6.54.E+07            | 6.98.E+07            | 5.97.E+07            | 7.27.E+07            | 7.39.E+07            | 7.28.E+07            |
| 2542 | Q15075    | Early endosome antigen 1 [OS=Homo sapiens]                                                | 3.451         |                   |                   |                   |                   |                      |                      |                      |                      |                      |                      |                      |                      |
| 2543 | O75688    | Protein phosphatase 1B [OS=Homo sapiens]                                                  | 3.447         | 2.49.E+07         | 4.37.E+07         |                   | 4.69.E+07         | 3.20.E+07            | 4.27.E+07            | 3.05.E+07            | 4.33.E+07            | 5.26.E+07            | 4.29.E+07            | 4.36.E+07            | 3.27.E+07            |
| 2544 | O00115    | Deoxyribonuclease-2-alpha [OS=Homo sapiens]                                               | 3.435         | 2.47.E+07         | 1.79.E+07         | 1.92.E+07         | 2.24.E+07         | 2.19.E+07            |                      |                      |                      | 2.27.E+07            | 2.30.E+07            |                      | 2.61.E+07            |
| 2545 | Q16401    | 26S proteasome non-ATPase regulatory subunit 5 [OS=Homo sapiens]                          | 3.418         | 6.90.E+06         | 7.49.E+06         | 1.07.E+07         | 3.84.E+06         | 5.93.E+06            | 7.59.E+06            | 6.89.E+06            | 6.23.E+06            | 8.14.E+06            | 6.50.E+06            | 8.80.E+06            | 8.40.E+06            |
| 2546 | Q99933    | BAG family molecular chaperone regulator 1 [OS=Homo sapiens]                              | 3.417         |                   |                   |                   |                   |                      |                      |                      |                      |                      |                      |                      |                      |
| 2547 | Q86TS9-1  | 39S ribosomal protein L52, mitochondrial [OS=Homo sapiens]                                | 3.41          |                   |                   |                   |                   |                      |                      |                      |                      |                      |                      |                      |                      |
| 2548 | Q8WUY1    | Protein THEM6 [OS=Homo sapiens]                                                           | 3.403         | 3.25.E+07         | 3.28.E+07         | 3.11.E+07         | 3.81.E+07         | 3.20.E+07            | 3.44.E+07            | 3.42.E+07            | 3.32.E+07            | 3.10.E+07            | 3.16.E+07            | 3.13.E+07            | 3.32.E+07            |
| 2549 | P03891    | NADH-ubiquinone oxidoreductase chain 2 [OS=Homo sapiens]                                  | 3.4           |                   | 4.86.E+06         | 6.84.E+06         | 6.16.E+06         | 5.80.E+06            | 6.02.E+06            | 5.50.E+06            | 1.07.E+06            |                      | 5.21.E+06            | 5.28.E+06            | 6.14.E+06            |
| 2550 | Q13630    | GDP-L-fucose synthase [OS=Homo sapiens]                                                   | 3.397         | 2.70.E+07         | 2.67.E+07         | 3.63.E+07         | 3.15.E+07         | 3.19.E+07            | 3.54.E+07            | 3.48.E+07            | 3.90.E+07            | 2.56.E+07            | 3.49.E+07            | 3.68.E+07            | 3.33.E+07            |
| 2551 | O75691    | Small subunit processome component 20 homolog [OS=Homo sapiens]                           | 3.386         | 7.82.E+06         | 4.00.E+06         | 9.22.E+05         |                   |                      | 3.51.E+05            |                      |                      |                      |                      |                      |                      |
| 2552 | Q9NZJ9-2  | Isoform 2 of Diphosphoinositol polyphosphate phosphohydrolase 2 [OS=Homo sapiens]         | 3.374         | 4.51.E+06         | 3.90.E+06         | 3.59.E+06         | 5.24.E+06         | 4.21.E+06            | 2.62.E+06            | 2.71.E+06            | 2.78.E+06            | 4.26.E+06            | 3.33.E+06            | 3.76.E+06            | 3.49.E+06            |
| 2553 | P82663    | 28S ribosomal protein S25, mitochondrial [OS=Homo sapiens]                                | 3.373         | 9.04.E+06         | 8.14.E+06         | 9.06.E+06         | 9.52.E+06         | 9.17.E+06            | 9.48.E+06            | 1.03.E+07            | 8.07.E+06            | 9.42.E+06            | 1.12.E+07            | 1.14.E+07            | 1.24.E+07            |
| 2554 | Q9NV35    | Nucleotide triphosphate diphosphatase NUDT15 [OS=Homo sapiens]                            | 3.371         | 6.21.E+06         | 6.53.E+06         | 5.95.E+06         | 6.38.E+06         | 9.53.E+06            | 8.99.E+06            | 8.49.E+06            | 9.71.E+06            | 8.58.E+06            | 9.12.E+06            | 9.30.E+06            | 8.24.E+06            |
| 2555 | Q9UNI6    | Dual specificity protein phosphatase 12 [OS=Homo sapiens]                                 | 3.36          | 2.22.E+07         | 2.41.E+07         | 2.12.E+07         | 2.07.E+07         | 2.12.E+07            | 2.08.E+07            | 2.10.E+07            | 2.42.E+07            | 2.16.E+07            | 1.68.E+07            | 2.05.E+07            | 1.98.E+07            |
| 2556 | P35610    | sterol O-acetyltransferase 1 [OS=Homo sapiens]                                            | 3.346         | 2.32.E+07         | 2.41.E+07         | 2.46.E+07         | 2.27.E+07         | 1.75.E+07            | 1.54.E+07            | 1.70.E+07            | 7.58.E+06            | 2.21.E+07            | 2.10.E+07            | 2.57.E+07            | 2.77.E+07            |
| 2557 | Q9Y613    | FH1/FH2 domain-containing protein 1 [OS=Homo sapiens]                                     | 3.337         | 7.10.E+06         | 8.84.E+06         | 6.94.E+06         | 9.32.E+07         | 7.16.E+06            | 6.99.E+06            | 6.18.E+06            | 6.44.E+06            | 8.73.E+06            | 9.37.E+06            | 1.09.E+07            | 8.45.E+06            |
| 2558 | O15498    | Synaptobrevin homolog YKT6 [OS=Homo sapiens]                                              | 3.332         | 4.56.E+07         | 4.82.E+07         | 4.69.E+07         | 4.65.E+07         | 4.97.E+07            | 5.20.E+07            | 5.40.E+07            | 5.37.E+07            | 5.63.E+07            | 5.24.E+07            | 5.07.E+07            | 5.17.E+07            |
| 2559 | P32519-1  | ETS-related transcription factor E1f-1 [OS=Homo sapiens]                                  | 3.331         |                   |                   |                   |                   |                      |                      |                      |                      |                      |                      |                      |                      |
| 2560 | Q9Y4E8    | ubiquitin carboxyl-terminal hydrolase 15 [OS=Homo sapiens]                                | 3.315         | 4.38.E+07         | 4.56.E+07         | 3.79.E+07         | 4.00.E+07         | 4.39.E+07            | 3.27.E+07            | 3.75.E+07            | 4.88.E+07            | 4.31.E+07            | 3.14.E+07            | 4.63.E+07            | 5.41.E+07            |
| 2561 | Q9P2N5    | RNA-binding protein 27 [OS=Homo sapiens]                                                  | 3.294         |                   |                   |                   |                   |                      |                      |                      |                      |                      |                      |                      |                      |
| 2562 | P82932    | 28S ribosomal protein S6, mitochondrial [OS=Homo sapiens]                                 | 3.292         |                   |                   |                   |                   | 1.45.E+06            |                      |                      | 3.05.E+06            | 1.65.E+05            |                      |                      |                      |
| 2563 | Q9H773    | dCTP pyrophosphatase 1 [OS=Homo sapiens]                                                  | 3.289         |                   |                   |                   |                   | 2.67.E+07            | 2.61.E+07            | 3.02.E+07            | 4.45.E+07            | 2.15.E+07            | 2.20.E+07            | 2.98.E+07            | 2.77.E+07            |
| 2564 | O00139-2  | Isoform 2 of Kinesin-like protein KIF2A [OS=Homo sapiens]                                 | 3.284         | 1.27.E+06         | 1.38.E+06         | 1.22.E+06         | 1.33.E+06         | 1.45.E+06            | 1.20.E+06            | 1.33.E+06            | 1.31.E+06            | 1.52.E+06            | 1.60.E+06            | 1.25.E+06            | 1.20.E+06            |
| 2565 | Q8IWS0-1  | PHD finger protein 6 [OS=Homo sapiens]                                                    | 3.269         | 1.14.E+07         | 9.25.E+06         | 1.07.E+07         | 8.52.E+06         | 8.04.E+06            | 1.05.E+07            | 7.21.E+06            | 8.72.E+06            | 1.14.E+07            | 9.67.E+06            | 1.14.E+07            | 1.37.E+07            |
| 2566 | Q86VU5    | Catechol O-methyltransferase domain-containing protein 1 [OS=Homo sapiens]                | 3.264         | 3.69.E+06         | 2.09.E+06         | 1.65.E+06         |                   | 4.34.E+06            | 2.58.E+06            |                      | 2.24.E+06            |                      |                      | 1.70.E+06            |                      |
| 2567 | Q8N8E3    | Centrosomal protein of 112 kDa [OS=Homo sapiens]                                          | 3.252         | 3.31.E+06         | 3.56.E+06         | 3.96.E+06         | 3.91.E+06         | 4.36.E+06            | 4.99.E+06            | 4.81.E+06            | 4.33.E+06            | 3.64.E+06            | 3.50.E+06            | 3.32.E+06            | 3.72.E+06            |
| 2568 | Q15021    | condensin complex subunit 1 [OS=Homo sapiens]                                             | 3.249         | 6.50.E+07         | 6.63.E+07         | 6.34.E+07         | 6.49.E+07         | 6.69.E+07            | 6.79.E+07            | 6.64.E+07            | 6.83.E+07            | 8.16.E+07            | 7.61.E+07            | 7.79.E+07            | 7.32.E+07            |
| 2569 | P29218-1  | Inositol monophosphatase 1 [OS=Homo sapiens]                                              | 3.248         | 1.91.E+07         | 1.82.E+07         | 1.65.E+07         | 1.29.E+07         | 1.36.E+07            | 1.20.E+07            | 1.14.E+07            | 1.59.E+07            | 1.92.E+07            | 1.51.E+07            | 1.51.E+07            | 1.54.E+07            |
| 2570 | Q13444    | Disintegrin and metalloproteinase domain-containing protein 15 [OS=Homo sapiens]          | 3.239         |                   | 9.93.E+05         | 1.20.E+06         |                   | 1.52.E+05            |                      | 4.58.E+05            |                      | 1.79.E+05            |                      |                      |                      |
| 2571 | Q9UL45    | Biogenesis of lysosome-related organelles complex 1 subunit 6 [OS=Homo sapiens]           | 3.237         |                   |                   |                   |                   |                      |                      |                      |                      |                      |                      |                      |                      |
| 2572 | O75880    | Protein SCO1 homolog, mitochondrial [OS=Homo sapiens]                                     | 3.237         | 1.04.E+07         | 9.88.E+06         | 7.23.E+06         | 3.92.E+06         | 4.41.E+06            | 3.49.E+06            | 2.65.E+06            | 2.89.E+06            |                      |                      |                      | 1.96.E+06            |
| 2573 | Q9NYC9-1  | Dynein heavy chain 9, axonemal [OS=Homo sapiens]                                          | 3.233         | 3.97.E+07         | 4.27.E+07         | 3.36.E+07         | 3.46.E+07         | 3.54.E+07            | 2.56.E+07            | 2.58.E+07            | 2.56.E+07            | 4.22.E+07            | 3.65.E+07            | 3.96.E+07            | 3.23.E+07            |
| 2574 | Q9BW91-1  | ADP-ribose pyrophosphatase, mitochondrial [OS=Homo sapiens]                               | 3.225         | 1.09.E+07         | 1.31.E+07         | 1.16.E+07         | 1.60.E+07         | 8.33.E+06            | 9.91.E+06            | 9.51.E+06            | 1.16.E+07            | 1.46.E+07            | 1.46.E+07            | 1.49.E+07            | 1.74.E+07            |
| 2575 | Q9NPR2-1  | Semaphorin-4B [OS=Homo sapiens]                                                           | 3.222         | 6.71.E+06         | 6.56.E+06         |                   |                   | 1.06.E+07            |                      |                      |                      |                      |                      |                      |                      |
| 2576 | O76031    | ATP-dependent Clp protease ATP-binding subunit clpX-like, mitochondrial [OS=Homo sapiens] | 3.217         | 1.77.E+07         | 1.76.E+07         | 1.63.E+07         | 1.41.E+07         | 1.15.E+07            | 1.08.E+07            | 1.24.E+07            | 1.26.E+07            | 1.42.E+07            | 1.47.E+07            | 1.28.E+07            | 1.56.E+07            |
| 2577 | Q96GM8    | Target of EGR1 protein 1 [OS=Homo sapiens]                                                | 3.216         | 1.00.E+07         | 7.91.E+06         | 1.00.E+07         | 9.31.E+06         | 7.99.E+06            | 8.36.E+06            | 9.04.E+06            | 2.46.E+06            | 6.13.E+06            | 6.28.E+06            | 5.60.E+06            | 6.17.E+06            |
| 2578 | C9JLW8    | Mapk-regulated corepressor-interacting protein 1 [OS=Homo sapiens]                        | 3.179         | 1.69.E+07         | 1.61.E+07         | 1.82.E+07         | 1.61.E+07         | 1.02.E+07            | 1.23.E+07            | 1.25.E+07            | 1.32.E+07            | 1.45.E+07            | 1.10.E+07            | 1.23.E+07            | 1.25.E+07            |
| 2579 | Q9NUW8    | tyrosyl-DNA phosphodiesterase 1 [OS=Homo sapiens]                                         | 3.163         | 1.86.E+06         |                   |                   |                   |                      |                      |                      |                      |                      |                      |                      |                      |
| 2580 | Q8IX12    | Cell division cycle and apoptosis regulator protein 1 [OS=Homo sapiens]                   | 3.156         | 1.18.E+07         | 1.23.E+07         | 9.80.E+06         | 9.63.E+06         | 7.87.E+06            | 7.72.E+06            | 6.65.E+06            | 6.41.E+06            | 1.08.E+07            | 8.85.E+06            | 1.01.E+07            | 1.10.E+07            |
| 2581 | P07711    | Cathepsin L1 [OS=Homo sapiens]                                                            | 3.142         | 1.78.E+07         | 2.20.E+07         | 2.01.E+07         | 1.83.E+07         | 1.97.E+07            |                      |                      | 1.71.E+07            | 1.82.E+07            | 2.12.E+07            | 2.04.E+07            | 1.98.E+07            |
| 2582 | Q8N983    | 39S ribosomal protein L43, mitochondrial [OS=Homo sapiens]                                | 3.138         |                   |                   |                   |                   |                      |                      |                      |                      |                      |                      |                      |                      |
| 2583 | Q9NZ45    | CDGSH iron-sulfur domain-containing protein 1 [OS=Homo sapiens]                           | 3.12          | 1.26.E+07         | 1.36.E+07         | 1.27.E+07         | 1.26.E+07         | 1.48.E+07            | 1.44.E+07            | 1.44.E+07            | 1.50.E+07            | 1.24.E+07            | 1.44.E+07            | 1.56.E+07            | 1.45.E+07            |
| 2584 | Q9H832    | Ubiquitin-conjugating enzyme E2 Z [OS=Homo sapiens]                                       | 3.116         | 3.43.E+06         | 3.29.E+06         | 3.37.E+06         | 3.93.E+06         | 5.17.E+06            | 5.10.E+06            | 5.32.E+06            | 6.11.E+06            | 4.79.E+06            | 4.28.E+06            | 4.00.E+06            | 3.47.E+06            |
| 2585 | P14406    | Cytochrome c oxidase subunit 7A2, mitochondrial [OS=Homo sapiens]                         | 3.116         | 2.07.E+08         | 2.10.E+08         | 2.05.E+08         | 1.22.E+08         | 1.29.E+08            | 1.35.E+08            | 1.42.E+08            | 1.45.E+08            | 9.58.E+07            | 8.82.E+07            | 8.69.E+07            | 8.76.E+07            |
| 2586 | Q96G23    | Ceramide synthase 2 [OS=Homo sapiens]                                                     | 3.105         | 6.70.E+07         | 6.68.E+07         | 7.99.E+07         | 6.01.E+07         | 7.86.E+07            | 7.68.E+07            | 7.25.E+07            | 7.13.E+07            | 8.21.E+07            | 7.40.E+07            | 7.30.E+07            | 6.85.E+07            |

| No.  | Accession | Description                                                                                                                    | Sum PEP Score | CTRL Abundances_1 | CTRL Abundances_2 | CTRL Abundances_3 | CTRL Abundances_4 | CLDN6-1 Abundances_1 | CLDN6-1 Abundances_2 | CLDN6-1 Abundances_3 | CLDN6-1 Abundances_4 | CLDN6-2 Abundances_1 | CLDN6-2 Abundances_2 | CLDN6-2 Abundances_3 | CLDN6-2 Abundances_4 |
|------|-----------|--------------------------------------------------------------------------------------------------------------------------------|---------------|-------------------|-------------------|-------------------|-------------------|----------------------|----------------------|----------------------|----------------------|----------------------|----------------------|----------------------|----------------------|
| 2587 | Q75439    | mitochondrial-processing peptidase subunit beta [OS=Homo sapiens]                                                              | 3.105         | 1.54.E+07         |                   | 1.89.E+07         | 2.22.E+07         | 1.62.E+07            | 1.51.E+07            |                      | 1.50.E+07            | 1.39.E+07            | 2.03.E+07            | 1.70.E+07            | 1.62.E+07            |
| 2588 | Q96HV5    | Transmembrane protein 41A [OS=Homo sapiens]                                                                                    | 3.102         | 2.36.E+06         |                   | 6.26.E+05         | 1.15.E+06         | 7.31.E+05            | 5.43.E+05            |                      | 7.38.E+05            | 1.56.E+06            | 3.98.E+05            | 1.48.E+06            |                      |
| 2589 | Q9Y5J1    | U3 small nucleolar RNA-associated protein 18 homolog [OS=Homo sapiens]                                                         | 3.088         | 1.12.E+06         | 1.10.E+06         | 1.31.E+06         | 1.56.E+06         | 1.56.E+06            | 1.71.E+06            | 1.58.E+06            | 1.50.E+06            | 1.25.E+06            | 1.18.E+06            | 1.13.E+06            | 1.22.E+06            |
| 2590 | Q724H8    | KDEL motif-containing protein 2 [OS=Homo sapiens]                                                                              | 3.07          | 4.32.E+06         | 2.56.E+06         | 2.75.E+06         | 3.53.E+06         | 3.89.E+06            | 2.55.E+06            | 3.22.E+06            | 2.94.E+06            | 2.29.E+06            | 2.81.E+06            | 2.06.E+06            | 2.30.E+06            |
| 2591 | Q9UGJ1    | gamma-tubulin complex component 4 [OS=Homo sapiens]                                                                            | 3.064         | 7.20.E+06         | 9.48.E+06         | 3.13.E+06         | 3.11.E+06         | 7.69.E+06            | 3.86.E+06            | 3.43.E+06            | 1.53.E+07            | 7.78.E+06            | 1.38.E+07            | 2.19.E+06            | 3.30.E+06            |
| 2592 | Q96IZ0    | PRKC apoptosis WT1 regulator protein [OS=Homo sapiens]                                                                         | 3.063         |                   |                   | 7.49.E+05         | 1.09.E+06         | 1.54.E+06            | 6.37.E+06            | 6.64.E+06            | 3.28.E+06            | 5.85.E+06            | 6.50.E+06            | 6.29.E+06            | 6.71.E+06            |
| 2593 | Q9NV70-1  | exocyst complex component 1 [OS=Homo sapiens]                                                                                  | 3.062         | 5.21.E+06         | 2.81.E+06         | 2.13.E+06         | 5.00.E+06         | 3.36.E+06            |                      | 7.15.E+05            | 8.84.E+05            | 2.23.E+06            |                      | 6.86.E+05            | 8.32.E+05            |
| 2594 | P30047    | GTP cyclohydrolase 1 feedback regulatory protein [OS=Homo sapiens]                                                             | 3.062         | 1.15.E+07         | 5.76.E+06         | 7.81.E+06         | 7.31.E+06         | 8.76.E+06            | 1.06.E+07            | 9.43.E+06            | 1.29.E+07            |                      | 1.26.E+06            |                      | 3.76.E+06            |
| 2595 | Q6UWE0    | E3 ubiquitin-protein ligase LRSAM1 [OS=Homo sapiens]                                                                           | 3.062         | 3.13.E+06         | 2.20.E+05         |                   | 6.13.E+05         | 1.18.E+06            |                      |                      | 1.85.E+06            |                      |                      | 9.33.E+05            |                      |
| 2596 | P29558-1  | RNA-binding motif, single-stranded-interacting protein 1 [OS=Homo sapiens]                                                     | 3.042         | 1.24.E+07         | 1.10.E+07         | 1.68.E+07         | 1.27.E+07         | 8.28.E+06            | 8.47.E+06            | 7.90.E+06            | 8.10.E+06            | 1.58.E+07            | 1.72.E+07            | 1.14.E+07            | 1.07.E+07            |
| 2597 | Q9UKG1    | DCC-interacting protein 13-alpha [OS=Homo sapiens]                                                                             | 3.042         | 3.61.E+06         | 3.37.E+06         | 3.40.E+06         | 4.16.E+06         | 4.12.E+06            | 4.41.E+06            | 4.21.E+06            | 3.98.E+06            | 4.33.E+06            | 4.04.E+06            | 4.01.E+06            | 4.23.E+06            |
| 2598 | Q9NQ88    | Fructose-2,6-bisphosphatase TIGAR [OS=Homo sapiens]                                                                            | 3.009         |                   | 4.28.E+06         | 3.36.E+06         | 4.31.E+05         | 6.67.E+06            | 4.04.E+06            | 4.06.E+06            | 4.37.E+06            | 4.31.E+06            | 2.60.E+06            | 4.02.E+06            | 3.55.E+06            |
| 2599 | Q95817    | BAG family molecular chaperone regulator 3 [OS=Homo sapiens]                                                                   | 3             | 1.74.E+07         |                   |                   | 1.56.E+07         | 1.86.E+07            | 1.85.E+07            | 2.11.E+07            | 1.83.E+07            | 2.37.E+07            | 2.20.E+07            |                      | 2.10.E+07            |
| 2600 | Q9NTI5    | Sister chromatid cohesion protein PDS5 homolog B [OS=Homo sapiens]                                                             | 2.998         | 6.22.E+06         | 6.28.E+06         | 5.12.E+06         | 5.82.E+06         | 5.85.E+06            | 4.66.E+06            | 5.63.E+06            | 5.55.E+06            | 1.02.E+07            | 9.93.E+06            | 1.01.E+07            | 1.19.E+07            |
| 2601 | Q95881    | Thioredoxin domain-containing protein 12 [OS=Homo sapiens]                                                                     | 2.996         | 3.22.E+07         | 2.90.E+07         | 2.82.E+07         | 2.42.E+07         | 2.61.E+07            | 2.62.E+07            | 2.30.E+07            | 2.70.E+07            | 2.74.E+07            | 3.01.E+07            | 3.58.E+07            | 3.99.E+07            |
| 2602 | Q13206    | probable ATP-dependent RNA helicase DDX10 [OS=Homo sapiens]                                                                    | 2.994         | 8.59.E+06         | 6.76.E+06         | 7.03.E+06         | 6.41.E+06         | 1.82.E+06            | 2.17.E+06            | 1.52.E+06            | 2.41.E+05            | 1.34.E+06            | 3.16.E+06            | 1.92.E+06            |                      |
| 2603 | Q9NVZ3-2  | Isoform 2 of Adaptin ear-binding coat-associated protein 2 [OS=Homo sapiens]                                                   | 2.975         | 1.78.E+07         | 1.95.E+07         | 2.08.E+07         | 9.03.E+06         | 9.08.E+06            | 1.95.E+06            | 1.79.E+07            |                      | 1.32.E+07            | 1.68.E+07            | 1.91.E+07            | 2.79.E+07            |
| 2604 | P41743    | Protein kinase c iota type [OS=Homo sapiens]                                                                                   | 2.971         |                   |                   |                   |                   |                      |                      |                      |                      |                      |                      |                      |                      |
| 2605 | Q09MP3    | RAD51-associated protein 2 [OS=Homo sapiens]                                                                                   | 2.951         | 6.92.E+06         | 6.32.E+06         | 6.18.E+06         | 9.52.E+06         |                      | 6.08.E+06            | 6.35.E+06            | 5.85.E+06            | 5.22.E+06            | 4.74.E+06            | 5.32.E+06            | 5.28.E+06            |
| 2606 | Q9H4L7    | SWI/SNF-related matrix-associated actin-dependent regulator of chromatin subfamily A containing DEAD/H box 1 [OS=Homo sapiens] | 2.95          | 5.85.E+06         | 5.65.E+06         | 5.23.E+06         | 5.69.E+06         | 6.24.E+06            | 5.47.E+06            | 6.48.E+06            | 5.21.E+06            | 4.76.E+06            | 5.66.E+06            | 5.22.E+06            | 6.24.E+06            |
| 2607 | O00178    | GTP-binding protein 1 [OS=Homo sapiens]                                                                                        | 2.939         | 1.99.E+06         | 1.80.E+06         | 2.75.E+06         | 2.41.E+06         | 2.18.E+06            | 2.84.E+06            | 3.43.E+06            | 2.68.E+06            | 2.62.E+06            | 2.76.E+06            | 3.17.E+06            | 3.33.E+06            |
| 2608 | Q13123    | Protein Red [OS=Homo sapiens]                                                                                                  | 2.933         | 1.60.E+07         | 1.72.E+07         | 1.67.E+07         | 1.43.E+07         | 1.76.E+07            | 1.70.E+07            | 1.77.E+07            | 1.67.E+07            | 2.38.E+07            | 2.03.E+07            | 1.86.E+07            | 2.15.E+07            |
| 2609 | Q9H7B4-1  | Histone-lysine N-methyltransferase SMDY3 [OS=Homo sapiens]                                                                     | 2.904         | 3.87.E+06         |                   |                   |                   | 1.07.E+06            |                      |                      | 2.64.E+06            | 1.12.E+07            | 7.21.E+06            | 9.77.E+06            | 7.21.E+06            |
| 2610 | P49790    | Nuclear pore complex protein Nup153 [OS=Homo sapiens]                                                                          | 2.902         | 6.42.E+07         | 6.18.E+07         | 6.21.E+07         | 5.71.E+07         | 6.91.E+07            | 7.72.E+07            | 7.70.E+07            | 8.62.E+07            | 9.02.E+07            | 8.76.E+07            | 8.39.E+07            | 8.49.E+07            |
| 2611 | O75817    | Ribonuclease P protein subunit p20 [OS=Homo sapiens]                                                                           | 2.901         |                   |                   |                   |                   |                      |                      |                      |                      |                      |                      |                      |                      |
| 2612 | Q969M3    | Protein YIPF5 [OS=Homo sapiens]                                                                                                | 2.899         | 5.25.E+06         | 6.06.E+06         | 6.06.E+06         | 7.49.E+06         | 5.78.E+06            | 6.72.E+06            | 6.18.E+06            | 5.09.E+06            | 5.83.E+06            | 8.69.E+06            | 7.19.E+06            | 6.64.E+06            |
| 2613 | Q96AY3    | Peptidyl-prolyl cis-trans isomerase FKBP10 [OS=Homo sapiens]                                                                   | 2.874         | 1.90.E+07         | 6.07.E+06         | 6.07.E+06         | 2.00.E+07         | 8.57.E+06            | 1.28.E+07            | 1.31.E+07            | 7.84.E+06            | 1.63.E+07            | 1.21.E+07            | 7.97.E+06            | 5.83.E+06            |
| 2614 | Q9BV20-1  | methylthioribose-1-phosphate isomerase [OS=Homo sapiens]                                                                       | 2.873         | 6.07.E+06         | 6.61.E+06         | 6.52.E+06         | 7.18.E+06         |                      |                      |                      | 4.84.E+06            | 6.62.E+06            | 7.15.E+06            | 5.83.E+06            | 7.79.E+06            |
| 2615 | Q9NQ75    | exosome complex component RRP40 [OS=Homo sapiens]                                                                              | 2.86          | 9.86.E+06         | 8.29.E+06         | 8.91.E+06         | 8.00.E+06         | 1.50.E+06            |                      |                      |                      |                      |                      |                      |                      |
| 2616 | Q96CP7    | Callicitin [OS=Homo sapiens]                                                                                                   | 2.854         | 8.70.E+06         | 8.21.E+06         | 7.78.E+06         | 8.93.E+06         | 8.46.E+06            | 6.72.E+06            | 5.60.E+06            | 7.75.E+06            | 7.77.E+06            | 5.41.E+06            | 7.24.E+06            | 7.30.E+06            |
| 2617 | Q8IWA5    | Choline transporter-like protein 2 [OS=Homo sapiens]                                                                           | 2.826         | 4.33.E+07         | 4.35.E+07         | 4.07.E+07         | 4.61.E+07         | 4.09.E+07            | 3.22.E+07            | 3.99.E+07            | 3.64.E+07            | 3.65.E+07            | 3.69.E+07            | 3.33.E+07            | 3.45.E+07            |
| 2618 | P55212    | Caspase-6 [OS=Homo sapiens]                                                                                                    | 2.812         |                   |                   |                   |                   |                      |                      |                      |                      |                      |                      |                      |                      |
| 2619 | Q9UHQ4    | B-cell receptor-associated protein 29 [OS=Homo sapiens]                                                                        | 2.812         | 4.36.E+06         | 5.48.E+06         | 5.59.E+06         | 5.97.E+06         | 4.71.E+06            | 8.79.E+06            | 1.12.E+07            | 9.13.E+06            | 5.67.E+06            | 7.39.E+06            | 6.78.E+06            | 6.30.E+06            |
| 2620 | O75081    | Protein CBFA2T3 [OS=Homo sapiens]                                                                                              | 2.804         | 4.51.E+06         | 5.14.E+06         | 5.68.E+06         | 6.05.E+06         | 6.07.E+06            | 5.76.E+06            | 5.44.E+06            | 4.43.E+06            | 3.21.E+06            | 3.75.E+06            | 3.17.E+06            | 3.20.E+06            |
| 2621 | Q86UL3    | glycerol-3-phosphate acyltransferase 4 [OS=Homo sapiens]                                                                       | 2.8           |                   |                   |                   |                   |                      |                      |                      |                      |                      |                      |                      |                      |
| 2622 | Q96GC5-1  | 39S ribosomal protein L48, mitochondrial [OS=Homo sapiens]                                                                     | 2.793         | 1.40.E+07         | 1.29.E+07         | 1.30.E+07         | 1.51.E+07         | 1.15.E+07            | 1.05.E+07            | 9.49.E+06            | 1.32.E+07            | 1.27.E+07            | 1.31.E+07            | 1.18.E+07            | 1.32.E+07            |
| 2623 | Q01415-1  | N-acetylglucosaminase kinase [OS=Homo sapiens]                                                                                 | 2.789         | 1.84.E+07         | 1.93.E+07         | 1.74.E+07         | 1.83.E+07         | 1.45.E+07            | 1.39.E+07            | 1.79.E+07            | 2.06.E+07            | 2.48.E+07            | 2.56.E+07            | 2.45.E+07            | 2.77.E+07            |
| 2624 | Q2NL68-1  | Proline and serine-rich protein 3 [OS=Homo sapiens]                                                                            | 2.773         | 1.32.E+08         | 1.02.E+08         | 9.87.E+07         | 1.28.E+08         | 1.18.E+08            | 1.20.E+08            | 1.20.E+08            | 1.03.E+08            | 1.19.E+08            | 1.30.E+08            | 1.12.E+08            | 1.24.E+08            |
| 2625 | Q9BU76-1  | Multiple myeloma tumor-associated protein 2 [OS=Homo sapiens]                                                                  | 2.773         | 5.63.E+07         | 6.26.E+07         | 6.09.E+07         |                   | 5.78.E+07            |                      | 6.61.E+07            |                      | 6.04.E+07            | 6.01.E+07            | 6.73.E+07            | 1.81.E+07            |
| 2626 | Q96FX7    | tRNA (adenine(58)-N(1))-methyltransferase catalytic subunit TRMT61A [OS=Homo sapiens]                                          | 2.769         | 4.49.E+08         | 2.57.E+08         | 2.83.E+08         | 4.21.E+08         | 3.39.E+08            | 3.33.E+08            | 3.46.E+08            | 2.90.E+08            | 3.80.E+08            | 2.90.E+08            | 2.60.E+08            | 2.74.E+08            |
| 2627 | Q14671-1  | Pumilio homolog 1 [OS=Homo sapiens]                                                                                            | 2.744         | 5.10.E+06         | 5.00.E+06         | 5.42.E+06         | 4.88.E+06         | 7.42.E+06            | 5.69.E+06            | 2.33.E+06            | 3.45.E+06            |                      |                      |                      | 9.83.E+05            |
| 2628 | Q9UHD2    | Serine/threonine-protein kinase TBK1 [OS=Homo sapiens]                                                                         | 2.743         |                   |                   |                   |                   |                      |                      |                      |                      |                      |                      |                      |                      |
| 2629 | Q9Y2K7    | Lysine-specific demethylase 2A [OS=Homo sapiens]                                                                               | 2.734         | 1.40.E+07         | 1.47.E+07         |                   | 1.50.E+07         | 9.07.E+06            |                      |                      |                      |                      | 1.52.E+07            |                      | 1.36.E+07            |
| 2630 | Q9Y2X7-1  | ARF GTPase-activating protein GIT1 [OS=Homo sapiens]                                                                           | 2.725         |                   |                   |                   |                   |                      |                      |                      |                      |                      |                      |                      |                      |
| 2631 | O14965    | Aurora kinase A [OS=Homo sapiens]                                                                                              | 2.724         | 5.18.E+06         | 9.19.E+06         | 8.17.E+06         |                   | 1.06.E+07            | 5.56.E+06            | 7.04.E+06            | 2.08.E+06            | 1.00.E+07            | 8.74.E+06            | 1.11.E+07            |                      |
| 2632 | Q9BUL9    | Ribonuclease P protein subunit p25 [OS=Homo sapiens]                                                                           | 2.721         | 1.79.E+07         | 1.84.E+07         | 1.86.E+07         | 1.76.E+07         | 1.57.E+07            | 1.62.E+07            | 1.67.E+07            | 1.67.E+07            | 1.21.E+07            | 1.27.E+07            | 1.21.E+07            | 1.37.E+07            |
| 2633 | Q9HCE1    | Putative helicase MOV-10 [OS=Homo sapiens]                                                                                     | 2.72          | 8.92.E+06         | 1.10.E+07         | 1.09.E+07         | 9.97.E+06         | 1.16.E+07            | 1.31.E+07            | 1.31.E+07            | 1.45.E+07            | 1.69.E+07            | 1.65.E+07            | 1.72.E+07            | 1.77.E+07            |
| 2634 | P60604    | Ubiquitin-conjugating enzyme E2 G2 [OS=Homo sapiens]                                                                           | 2.718         |                   |                   |                   |                   |                      |                      |                      |                      |                      |                      |                      |                      |
| 2635 | Q2Q1W2    | E3 ubiquitin-protein ligase TRIM71 [OS=Homo sapiens]                                                                           | 2.702         | 8.12.E+06         | 8.81.E+06         | 9.86.E+06         | 1.12.E+07         | 1.11.E+07            | 1.03.E+07            | 9.45.E+06            | 7.18.E+06            | 5.71.E+06            | 6.53.E+06            | 5.91.E+06            | 5.76.E+06            |
| 2636 | Q8NEZ4    | Histone-lysine N-methyltransferase 2C [OS=Homo sapiens]                                                                        | 2.692         | 1.50.E+07         | 1.36.E+07         | 1.37.E+07         | 1.88.E+07         | 2.59.E+07            | 2.67.E+07            | 2.77.E+07            | 2.81.E+07            | 1.43.E+07            | 1.33.E+07            | 1.39.E+07            | 1.33.E+07            |
| 2637 | Q96J01    | THO complex subunit 3 [OS=Homo sapiens]                                                                                        | 2.672         | 1.89.E+07         | 1.87.E+07         | 9.59.E+06         | 1.83.E+07         | 2.03.E+07            | 1.71.E+07            | 1.97.E+07            | 1.64.E+07            | 1.96.E+07            | 1.64.E+07            | 1.70.E+07            | 1.94.E+07            |
| 2638 | Q92733    | proline-rich protein PRCC [OS=Homo sapiens]                                                                                    | 2.666         | 2.95.E+07         | 2.93.E+07         | 2.55.E+07         | 2.32.E+07         | 2.22.E+07            | 1.98.E+07            | 2.26.E+07            | 2.35.E+07            | 2.29.E+07            | 2.14.E+07            | 2.46.E+07            | 2.40.E+07            |
| 2639 | Q6P1L8    | 39S ribosomal protein L14, mitochondrial [OS=Homo sapiens]                                                                     | 2.661         | 1.43.E+07         | 1.35.E+07         | 1.49.E+07         | 1.48.E+07         | 1.36.E+07            | 1.53.E+07            | 1.40.E+07            | 1.57.E+07            | 1.53.E+07            | 1.68.E+07            | 1.68.E+07            | 1.67.E+07            |
| 2640 | O14530    | Thioredoxin domain-containing protein 9 [OS=Homo sapiens]                                                                      | 2.659         | 1.03.E+07         | 1.29.E+07         | 1.22.E+07         | 1.12.E+07         | 1.08.E+07            | 1.28.E+07            | 1.24.E+07            | 1.36.E+07            | 1.31.E+07            | 1.31.E+07            | 1.30.E+07            | 1.42.E+07            |
| 2641 | P02794    | Ferritin heavy chain [OS=Homo sapiens]                                                                                         | 2.659         | 2.31.E+07         | 2.64.E+07         | 2.54.E+07         | 2.03.E+07         | 2.35.E+07            | 2.23.E+07            | 2.53.E+07            | 2.72.E+07            | 2.21.E+07            | 2.17.E+07            | 2.08.E+07            | 2.09.E+07            |

| No.  | Accession | Description                                                                           | Sum PEP Score | CTRL Abundances_1 | CTRL Abundances_2 | CTRL Abundances_3 | CTRL Abundances_4 | CLDN6-1 Abundances_1 | CLDN6-1 Abundances_2 | CLDN6-1 Abundances_3 | CLDN6-1 Abundances_4 | CLDN6-2 Abundances_1 | CLDN6-2 Abundances_2 | CLDN6-2 Abundances_3 | CLDN6-2 Abundances_4 |
|------|-----------|---------------------------------------------------------------------------------------|---------------|-------------------|-------------------|-------------------|-------------------|----------------------|----------------------|----------------------|----------------------|----------------------|----------------------|----------------------|----------------------|
| 2642 | Q96JJ7-1  | Protein disulfide-isomerase TMX3 [OS=Homo sapiens]                                    | 2.658         | 1.06.E+07         | 9.58.E+06         | 9.78.E+06         | 8.84.E+06         | 1.30.E+07            | 1.12.E+07            | 1.11.E+07            | 1.37.E+07            | 1.42.E+07            | 1.07.E+07            | 1.26.E+07            | 1.18.E+07            |
| 2643 | Q9Y4Z0    | U6 snRNA-associated Sm-like protein LSm4 [OS=Homo sapiens]                            | 2.656         | 1.41.E+07         | 3.23.E+07         |                   | 1.28.E+07         |                      | 3.14.E+07            | 2.47.E+07            | 1.46.E+07            | 1.49.E+07            | 1.66.E+07            | 1.09.E+07            | 1.04.E+07            |
| 2644 | Q9Y520    | Protein Prrc2c [OS=Homo sapiens]                                                      | 2.655         | 1.40.E+06         | 1.41.E+06         | 3.72.E+06         | 1.70.E+06         | 2.05.E+06            | 1.78.E+06            | 3.58.E+06            | 2.99.E+06            | 1.60.E+06            | 3.35.E+06            | 3.26.E+06            | 3.30.E+06            |
| 2645 | Q13601    | KRR1 small subunit processome component homolog [OS=Homo sapiens]                     | 2.645         | 1.49.E+07         | 1.72.E+07         | 1.74.E+07         | 1.93.E+07         | 1.76.E+07            | 1.74.E+07            | 1.86.E+07            | 1.93.E+07            | 1.62.E+07            | 1.63.E+07            | 1.77.E+07            | 1.60.E+07            |
| 2646 | Q9BYN8    | 28S ribosomal protein S26, mitochondrial [OS=Homo sapiens]                            | 2.639         | 4.75.E+06         | 5.03.E+06         | 4.89.E+06         | 6.54.E+06         | 6.01.E+06            | 6.27.E+06            | 6.68.E+06            | 6.72.E+06            | 5.81.E+06            | 5.14.E+06            | 6.08.E+06            | 5.62.E+06            |
| 2647 | P84101-1  | Small EDRK-rich factor 2 [OS=Homo sapiens]                                            | 2.628         | 2.98.E+06         | 2.34.E+06         | 3.46.E+06         | 3.49.E+06         | 4.02.E+06            | 4.21.E+06            | 3.40.E+06            | 2.89.E+06            | 2.21.E+06            | 2.08.E+06            | 2.10.E+06            | 2.18.E+06            |
| 2648 | O75530    | Polycomb protein EED [OS=Homo sapiens]                                                | 2.62          | 3.71.E+06         | 4.93.E+06         | 4.40.E+06         | 5.19.E+06         | 5.32.E+06            | 4.52.E+06            | 5.37.E+06            | 4.93.E+06            | 4.59.E+06            | 4.15.E+06            | 4.17.E+06            | 4.02.E+06            |
| 2649 | Q9P2B2    | prostaglandin F2 receptor negative regulator [OS=Homo sapiens]                        | 2.619         |                   |                   |                   |                   |                      |                      |                      |                      |                      |                      |                      |                      |
| 2650 | Q8WW22-1  | DnaJ homolog subfamily A member 4 [OS=Homo sapiens]                                   | 2.617         | 5.77.E+06         | 7.23.E+06         | 7.08.E+06         | 7.60.E+06         |                      | 7.59.E+06            | 7.51.E+06            | 9.41.E+06            | 6.27.E+06            | 6.74.E+06            | 6.61.E+06            | 7.07.E+06            |
| 2651 | Q9P2T1-1  | GMP reductase 2 [OS=Homo sapiens]                                                     | 2.604         | 8.07.E+06         | 7.65.E+06         | 6.79.E+06         | 6.26.E+06         | 5.38.E+06            | 4.93.E+06            | 4.10.E+06            | 5.43.E+06            | 8.91.E+06            | 6.42.E+06            | 6.33.E+06            | 5.54.E+06            |
| 2652 | Q8N357    | Solute carrier family 35 member F6 [OS=Homo sapiens]                                  | 2.604         | 1.70.E+06         | 1.72.E+06         | 1.47.E+06         | 2.08.E+06         | 3.59.E+06            | 3.73.E+06            | 3.53.E+06            | 3.10.E+06            | 2.02.E+06            | 1.76.E+06            | 1.94.E+06            | 1.75.E+06            |
| 2653 | Q13907    | Isopentenyl-diphosphate Delta-isomerase 1 [OS=Homo sapiens]                           | 2.6           | 1.43.E+07         | 1.09.E+07         | 1.13.E+07         | 1.34.E+07         | 1.00.E+07            | 9.30.E+06            | 1.25.E+07            | 1.14.E+07            |                      | 1.15.E+07            | 1.13.E+07            | 1.39.E+07            |
| 2654 | Q96JB5    | CDK5 regulatory subunit-associated protein 3 [OS=Homo sapiens]                        | 2.589         | 2.02.E+07         | 1.96.E+07         | 1.98.E+07         | 2.21.E+07         | 1.69.E+07            | 1.68.E+07            | 1.82.E+07            | 1.75.E+07            | 2.34.E+07            | 2.07.E+07            | 2.19.E+07            | 1.94.E+07            |
| 2655 | Q8N988-1  | Zinc finger protein 557 [OS=Homo sapiens]                                             | 2.573         | 3.28.E+05         | 2.35.E+05         | 3.01.E+05         | 3.42.E+05         | 6.91.E+05            | 6.14.E+05            | 6.09.E+05            | 5.58.E+05            | 4.89.E+05            | 4.14.E+05            | 4.05.E+05            | 4.82.E+05            |
| 2656 | Q8WVY7    | Ubiquitin-like domain-containing CTD phosphatase 1 [OS=Homo sapiens]                  | 2.568         | 4.01.E+06         | 3.78.E+06         | 3.71.E+06         | 4.09.E+06         | 5.16.E+06            | 5.81.E+06            | 4.52.E+06            | 6.53.E+06            | 6.65.E+06            | 7.15.E+06            | 7.83.E+06            | 6.91.E+06            |
| 2657 | P51580    | Thiopurine S-methyltransferase [OS=Homo sapiens]                                      | 2.559         | 2.42.E+07         | 2.20.E+07         | 2.03.E+07         | 2.01.E+07         | 2.21.E+07            | 2.02.E+07            | 2.08.E+07            | 2.10.E+07            | 2.51.E+07            | 2.32.E+07            | 2.28.E+07            | 2.34.E+07            |
| 2658 | O94822-3  | Isoform 3 of E3 ubiquitin-protein ligase listerin [OS=Homo sapiens]                   | 2.558         | 2.48.E+07         | 2.04.E+07         | 2.76.E+07         | 2.75.E+07         | 2.49.E+07            | 2.77.E+07            | 2.32.E+07            | 2.35.E+07            | 2.12.E+07            | 2.14.E+07            | 2.24.E+07            | 2.27.E+07            |
| 2659 | P82912-1  | 28S ribosomal protein S11, mitochondrial [OS=Homo sapiens]                            | 2.555         | 2.48.E+07         | 2.54.E+07         | 3.00.E+07         | 2.86.E+07         | 2.36.E+07            | 2.53.E+07            | 2.60.E+07            | 2.66.E+07            | 2.80.E+07            | 3.53.E+07            | 3.23.E+07            | 3.25.E+07            |
| 2660 | P53611    | Geranylgeranyl transferase type-2 subunit beta [OS=Homo sapiens]                      | 2.545         | 8.41.E+06         | 8.47.E+06         | 1.01.E+07         | 1.13.E+07         |                      | 8.10.E+06            | 7.88.E+06            | 7.59.E+06            | 9.89.E+06            | 8.84.E+06            | 1.01.E+07            | 8.19.E+06            |
| 2661 | O95171    | Sciellin [OS=Homo sapiens]                                                            | 2.536         | 2.46.E+07         | 1.71.E+07         |                   | 1.92.E+07         | 1.43.E+07            | 1.75.E+07            | 1.90.E+07            | 2.91.E+07            | 2.50.E+07            |                      | 2.28.E+07            | 2.02.E+07            |
| 2662 | Q8NB16    | Mixed lineage kinase domain-like protein [OS=Homo sapiens]                            | 2.518         | 1.03.E+07         | 1.45.E+07         | 1.67.E+07         | 1.54.E+07         | 1.41.E+07            | 1.57.E+07            | 1.63.E+07            | 1.66.E+07            | 2.28.E+07            | 2.80.E+07            | 2.89.E+07            | 2.87.E+07            |
| 2663 | Q8IUW5    | RELT-like protein 1 [OS=Homo sapiens]                                                 | 2.516         |                   | 4.05.E+06         | 7.45.E+05         | 2.79.E+05         | 4.56.E+06            |                      |                      | 2.50.E+05            | 4.08.E+06            | 1.47.E+05            |                      |                      |
| 2664 | Q6P1X6    | UPF0598 protein C8orf82 [OS=Homo sapiens]                                             | 2.515         | 5.96.E+06         | 5.20.E+06         | 5.84.E+06         | 8.64.E+06         |                      | 9.89.E+06            | 1.06.E+07            | 7.86.E+06            | 7.69.E+06            | 1.02.E+07            | 9.04.E+06            | 9.28.E+06            |
| 2665 | P53990-1  | IST1 homolog [OS=Homo sapiens]                                                        | 2.511         | 1.23.E+07         | 1.04.E+07         |                   | 1.12.E+07         | 1.19.E+07            | 1.12.E+07            | 1.18.E+07            | 1.22.E+07            | 2.37.E+07            | 2.26.E+07            | 2.14.E+07            | 2.19.E+07            |
| 2666 | Q15070-1  | Mitochondrial inner membrane protein OXA1L [OS=Homo sapiens]                          | 2.505         | 6.40.E+06         |                   | 5.49.E+06         | 9.08.E+06         |                      |                      |                      | 3.69.E+06            | 7.18.E+06            | 1.04.E+07            | 9.30.E+06            | 7.44.E+06            |
| 2667 | Q5VZK9    | F-actin-uncapping protein LRRC16A [OS=Homo sapiens]                                   | 2.501         |                   |                   |                   |                   |                      |                      |                      |                      |                      |                      |                      |                      |
| 2668 | Q9NQR7    | Coiled-coil domain-containing protein 177 [OS=Homo sapiens]                           | 2.499         | 1.08.E+07         | 1.11.E+07         | 1.01.E+07         | 1.41.E+07         | 3.03.E+07            | 2.72.E+07            | 2.93.E+07            | 2.57.E+07            |                      |                      |                      |                      |
| 2669 | L0R6Q1    | SLC35A4 upstream open reading frame protein [OS=Homo sapiens]                         | 2.487         | 1.70.E+07         | 1.73.E+07         | 1.74.E+07         | 1.76.E+07         | 1.45.E+07            | 1.32.E+07            | 1.13.E+07            | 1.19.E+07            | 1.67.E+07            | 1.15.E+07            | 1.37.E+07            | 1.63.E+07            |
| 2670 | Q15024    | Exosome complex component RRP42 [OS=Homo sapiens]                                     | 2.486         | 1.11.E+07         | 1.19.E+07         | 1.24.E+07         | 1.27.E+07         | 1.26.E+07            | 1.22.E+07            | 1.25.E+07            | 1.38.E+07            | 1.44.E+07            | 1.48.E+07            | 1.41.E+07            | 1.58.E+07            |
| 2671 | Q9NTG7    | NAD-dependent protein deacetylase sirtuin-3, mitochondrial [OS=Homo sapiens]          | 2.483         |                   |                   |                   |                   |                      |                      |                      |                      |                      |                      |                      |                      |
| 2672 | Q9P2Y5    | UV radiation resistance-associated gene protein [OS=Homo sapiens]                     | 2.48          | 5.41.E+06         | 5.74.E+06         | 5.72.E+06         | 6.73.E+06         | 8.69.E+06            | 8.84.E+06            | 8.70.E+06            | 7.83.E+06            | 5.59.E+06            | 5.75.E+06            | 4.77.E+06            | 4.74.E+06            |
| 2673 | Q92618    | Zinc finger protein 516 [OS=Homo sapiens]                                             | 2.478         | 5.21.E+07         | 4.20.E+07         | 4.40.E+07         | 3.65.E+07         | 7.63.E+06            | 4.08.E+07            | 4.14.E+07            | 3.85.E+07            | 3.49.E+07            | 3.84.E+07            | 3.71.E+07            | 3.20.E+07            |
| 2674 | Q5XPI4    | E3 ubiquitin-protein ligase RNF123 [OS=Homo sapiens]                                  | 2.473         |                   |                   |                   |                   |                      |                      |                      |                      |                      |                      |                      |                      |
| 2675 | P35573-1  | glycogen debranching enzyme [OS=Homo sapiens]                                         | 2.463         | 1.21.E+07         | 1.36.E+07         | 1.35.E+07         | 1.25.E+07         | 1.18.E+07            | 9.33.E+06            | 1.22.E+07            | 1.58.E+07            | 1.44.E+07            | 1.08.E+07            | 1.15.E+07            | 1.52.E+07            |
| 2676 | P62877    | E3 ubiquitin-protein ligase RBX1 [OS=Homo sapiens]                                    | 2.456         | 7.66.E+06         | 9.13.E+06         | 8.88.E+06         | 1.25.E+07         | 1.08.E+07            | 1.29.E+07            | 1.30.E+07            | 1.24.E+07            | 1.03.E+07            | 1.02.E+07            | 9.27.E+06            | 8.02.E+06            |
| 2677 | O75127    | pentatricopeptide repeat-containing protein 1, mitochondrial [OS=Homo sapiens]        | 2.447         |                   |                   |                   |                   |                      |                      |                      |                      |                      |                      |                      |                      |
| 2678 | Q96EY7-1  | pentatricopeptide repeat domain-containing protein 3, mitochondrial [OS=Homo sapiens] | 2.441         |                   |                   |                   |                   |                      |                      |                      |                      |                      |                      |                      |                      |
| 2679 | P53803    | DNA-directed RNA polymerases I, II, and III subunit RPABC4 [OS=Homo sapiens]          | 2.438         | 2.34.E+08         | 2.40.E+08         | 2.82.E+08         | 2.63.E+08         | 2.40.E+08            | 2.65.E+08            | 2.74.E+08            | 2.79.E+08            | 2.10.E+08            | 2.71.E+08            | 2.53.E+08            | 2.54.E+08            |
| 2680 | Q9P016    | Thymocyte nuclear protein 1 [OS=Homo sapiens]                                         | 2.436         | 1.92.E+07         | 2.03.E+07         | 1.82.E+07         | 1.70.E+07         | 2.22.E+07            | 2.05.E+07            | 2.39.E+07            | 2.24.E+07            | 2.28.E+07            | 1.99.E+07            | 1.92.E+07            | 1.91.E+07            |
| 2681 | Q01804-1  | OTU domain-containing protein 4 [OS=Homo sapiens]                                     | 2.434         | 6.74.E+06         | 5.63.E+06         | 4.31.E+06         | 4.69.E+06         | 6.16.E+06            | 6.18.E+06            | 5.86.E+06            | 4.98.E+06            | 6.69.E+06            | 4.41.E+06            | 5.24.E+06            | 6.43.E+06            |
| 2682 | P42696    | RNA-binding protein 34 [OS=Homo sapiens]                                              | 2.426         | 6.83.E+06         | 6.89.E+06         | 5.48.E+06         | 6.60.E+06         | 7.18.E+06            | 5.58.E+06            | 4.98.E+06            | 4.81.E+06            | 6.38.E+06            | 5.24.E+06            | 5.41.E+06            |                      |
| 2683 | Q96NY7-1  | Chloride intracellular channel protein 6 [OS=Homo sapiens]                            | 2.412         |                   |                   |                   |                   |                      |                      |                      |                      |                      |                      |                      |                      |
| 2684 | P02751    | fibronectin [OS=Homo sapiens]                                                         | 2.404         | 3.30.E+06         | 3.95.E+06         | 4.36.E+06         | 4.44.E+06         | 3.63.E+06            | 3.10.E+06            | 3.36.E+06            | 3.41.E+06            | 3.40.E+06            | 3.63.E+06            | 3.42.E+06            | 3.26.E+06            |
| 2685 | O95166    | Gamma-aminobutyric acid receptor-associated protein [OS=Homo sapiens]                 | 2.401         | 1.52.E+07         | 1.67.E+07         | 1.60.E+07         | 1.79.E+07         | 1.40.E+07            | 1.47.E+07            | 1.38.E+07            | 1.60.E+07            | 1.21.E+07            | 1.42.E+07            | 1.23.E+07            | 1.20.E+07            |
| 2686 | Q96BP2    | Coiled-coil-helix-coiled-coil-helix domain-containing protein 1 [OS=Homo sapiens]     | 2.399         | 1.11.E+07         | 1.42.E+07         | 1.86.E+07         | 1.80.E+07         | 1.24.E+07            | 1.75.E+07            | 1.44.E+07            | 1.63.E+07            | 1.17.E+07            | 2.00.E+07            | 1.69.E+07            | 1.85.E+07            |
| 2687 | Q9UK61    | Protein TASOR [OS=Homo sapiens]                                                       | 2.399         |                   |                   |                   |                   |                      |                      |                      |                      |                      |                      |                      |                      |
| 2688 | Q9H2S1-1  | Small conductance calcium-activated potassium channel protein 2 [OS=Homo sapiens]     | 2.392         | 1.20.E+06         | 2.56.E+06         | 9.52.E+05         | 1.66.E+06         | 4.34.E+06            | 2.96.E+06            | 1.95.E+06            | 6.79.E+05            | 3.10.E+06            | 1.86.E+06            | 1.27.E+06            | 1.25.E+06            |
| 2689 | Q9Y4W6    | AFG3-like protein 2 [OS=Homo sapiens]                                                 | 2.373         |                   |                   |                   |                   |                      |                      |                      |                      |                      |                      |                      |                      |
| 2690 | Q13084    | 39S ribosomal protein L28, mitochondrial [OS=Homo sapiens]                            | 2.364         | 5.58.E+06         | 6.23.E+06         | 6.74.E+06         | 7.57.E+06         | 4.83.E+06            | 4.94.E+06            | 8.28.E+06            | 6.10.E+06            | 5.55.E+06            | 5.88.E+06            | 6.21.E+06            | 6.13.E+06            |
| 2691 | Q8N726    | Tumor suppressor ARF [OS=Homo sapiens]                                                | 2.354         | 3.34.E+05         | 3.31.E+05         | 3.63.E+05         | 3.45.E+05         | 3.98.E+05            | 4.52.E+05            | 4.35.E+05            | 3.76.E+05            | 4.15.E+05            | 3.69.E+05            | 3.59.E+05            | 3.49.E+05            |
| 2692 | Q6WKZ4-4  | Rab11 family-interacting protein 1 [OS=Homo sapiens]                                  | 2.353         | 7.32.E+06         | 5.49.E+06         | 6.22.E+06         | 4.73.E+06         |                      |                      |                      |                      | 5.71.E+06            | 4.79.E+06            |                      | 4.97.E+06            |

Supplemental Data 1. List of identified proteins

| No.  | Accession | Description                                                                                  | Sum PEP Score | CTRL Abundances_1 | CTRL Abundances_2 | CTRL Abundances_3 | CTRL Abundances_4 | CLDN6-1 Abundances_1 | CLDN6-1 Abundances_2 | CLDN6-1 Abundances_3 | CLDN6-1 Abundances_4 | CLDN6-2 Abundances_1 | CLDN6-2 Abundances_2 | CLDN6-2 Abundances_3 | CLDN6-2 Abundances_4 |
|------|-----------|----------------------------------------------------------------------------------------------|---------------|-------------------|-------------------|-------------------|-------------------|----------------------|----------------------|----------------------|----------------------|----------------------|----------------------|----------------------|----------------------|
| 2693 | P14616    | Insulin receptor-related protein [OS=Homo sapiens]                                           | 2.34          | 2.74.E+07         | 2.94.E+07         | 2.88.E+07         | 2.54.E+07         | 2.99.E+07            | 2.79.E+07            | 2.93.E+07            | 2.68.E+07            | 3.86.E+07            | 3.49.E+07            | 3.31.E+07            | 3.32.E+07            |
| 2694 | Q9H0U3    | Magnesium transporter protein 1 [OS=Homo sapiens]                                            | 2.335         | 1.26.E+07         | 1.37.E+07         | 1.39.E+07         | 1.76.E+07         | 1.35.E+07            | 1.34.E+07            | 1.27.E+07            | 1.41.E+07            | 1.44.E+07            | 1.46.E+07            | 1.29.E+07            | 1.42.E+07            |
| 2695 | O75976    | Carboxypeptidase D [OS=Homo sapiens]                                                         | 2.333         |                   | 7.05.E+06         | 2.82.E+06         | 3.81.E+06         |                      | 3.21.E+06            | 4.96.E+06            | 4.41.E+06            | 6.08.E+06            |                      | 5.41.E+06            | 1.83.E+06            |
| 2696 | Q6JEL2    | Kelch-like protein 10 [OS=Homo sapiens]                                                      | 2.323         |                   |                   |                   |                   |                      |                      |                      |                      |                      |                      |                      |                      |
| 2697 | P23786    | Carnitine O-palmitoyltransferase 2, mitochondrial [OS=Homo sapiens]                          | 2.301         | 7.03.E+06         | 6.55.E+06         | 7.37.E+06         | 7.31.E+06         | 5.06.E+06            | 5.84.E+06            | 5.30.E+06            | 6.03.E+06            | 5.62.E+06            | 6.82.E+06            | 7.11.E+06            | 6.10.E+06            |
| 2698 | Q9H6K4    | Optic atrophy 3 protein [OS=Homo sapiens]                                                    | 2.291         | 1.23.E+07         | 1.07.E+07         | 9.89.E+06         | 1.11.E+07         | 2.07.E+07            | 2.08.E+07            | 1.99.E+07            | 2.05.E+07            | 1.23.E+07            | 1.30.E+07            | 1.29.E+07            | 1.10.E+07            |
| 2699 | Q14320    | Protein FAM50A [OS=Homo sapiens]                                                             | 2.287         | 7.20.E+06         | 6.15.E+06         | 6.32.E+06         | 7.68.E+06         | 8.00.E+06            | 6.79.E+06            | 8.11.E+06            | 8.60.E+06            | 8.03.E+06            | 6.22.E+06            | 8.03.E+06            | 7.07.E+06            |
| 2700 | Q9UJY5-1  | ADP-ribosylation factor-binding protein GGA1 [OS=Homo sapiens]                               | 2.286         | 1.55.E+07         | 1.03.E+07         | 1.05.E+07         | 1.11.E+07         | 1.32.E+07            | 4.44.E+06            | 5.00.E+06            | 3.30.E+06            | 1.26.E+07            | 1.19.E+07            | 1.19.E+07            | 9.70.E+06            |
| 2701 | Q8NAF0    | Zinc finger protein 579 [OS=Homo sapiens]                                                    | 2.284         |                   |                   |                   |                   |                      |                      |                      |                      |                      |                      |                      |                      |
| 2702 | Q9NRY4    | Rho GTPase-activating protein 35 [OS=Homo sapiens]                                           | 2.264         | 3.90.E+06         | 3.07.E+06         | 3.30.E+06         | 2.36.E+06         | 4.88.E+06            | 4.79.E+06            | 5.47.E+06            | 4.11.E+06            | 4.41.E+06            | 3.61.E+06            | 3.25.E+06            | 4.24.E+06            |
| 2703 | O60547-1  | GDP-mannose 4,6 dehydratase [OS=Homo sapiens]                                                | 2.264         |                   |                   |                   |                   |                      |                      |                      |                      |                      |                      |                      |                      |
| 2704 | Q9H4L5    | Oxysterol-binding protein-related protein 3 [OS=Homo sapiens]                                | 2.263         |                   |                   |                   |                   |                      |                      |                      |                      |                      |                      |                      |                      |
| 2705 | Q9Y263    | Phospholipase A-2-activating protein [OS=Homo sapiens]                                       | 2.256         |                   |                   |                   |                   |                      |                      |                      |                      |                      |                      |                      |                      |
| 2706 | Q5ZPR3    | CD276 antigen [OS=Homo sapiens]                                                              | 2.244         | 4.47.E+06         | 4.70.E+06         | 3.57.E+06         | 5.58.E+06         | 5.04.E+06            | 2.87.E+06            | 4.37.E+06            | 5.53.E+06            | 5.02.E+06            | 4.18.E+06            | 3.15.E+06            | 4.35.E+06            |
| 2707 | Q9P260-1  | LisH domain and HEAT repeat-containing protein KIAA1468 [OS=Homo sapiens]                    | 2.242         | 2.59.E+06         | 1.79.E+06         | 2.43.E+06         | 7.87.E+05         | 2.72.E+06            | 2.10.E+06            |                      | 2.66.E+06            |                      |                      | 1.23.E+05            | 1.70.E+05            |
| 2708 | Q14997    | Proteasome activator complex subunit 4 [OS=Homo sapiens]                                     | 2.239         | 8.59.E+06         | 8.88.E+06         | 8.70.E+06         | 9.96.E+06         | 7.84.E+06            | 9.06.E+06            | 9.15.E+06            | 8.84.E+06            | 7.62.E+06            | 7.83.E+06            | 8.44.E+06            | 7.38.E+06            |
| 2709 | Q9H5N1    | rab GTPase-binding effector protein 2 [OS=Homo sapiens]                                      | 2.232         | 4.24.E+06         | 8.37.E+05         |                   | 2.91.E+06         | 9.76.E+06            | 1.16.E+06            | 5.32.E+05            | 3.71.E+06            | 5.56.E+06            | 3.35.E+05            | 1.97.E+06            | 1.43.E+06            |
| 2710 | Q96MU7-1  | YTH domain-containing protein 1 [OS=Homo sapiens]                                            | 2.205         | 1.96.E+07         | 2.04.E+07         | 1.68.E+07         | 1.54.E+07         | 1.97.E+07            | 1.50.E+07            | 1.23.E+07            | 1.45.E+07            | 2.24.E+07            | 1.82.E+07            |                      | 1.71.E+07            |
| 2711 | Q13257-1  | Mitotic spindle assembly checkpoint protein MAD2A [OS=Homo sapiens]                          | 2.199         | 3.80.E+07         | 4.34.E+07         | 4.27.E+07         | 4.30.E+07         | 4.66.E+07            | 4.37.E+07            | 4.61.E+07            | 4.65.E+07            | 3.71.E+07            | 4.37.E+07            | 4.38.E+07            | 4.17.E+07            |
| 2712 | Q9H9Y2    | Ribosome production factor 1 [OS=Homo sapiens]                                               | 2.184         | 2.55.E+06         | 3.40.E+06         | 3.43.E+06         | 4.01.E+06         | 3.54.E+06            | 3.56.E+06            | 3.75.E+06            | 3.43.E+06            | 2.49.E+06            | 2.63.E+06            | 2.39.E+06            | 2.87.E+06            |
| 2713 | O43402    | ER membrane protein complex subunit 8 [OS=Homo sapiens]                                      | 2.17          | 3.72.E+07         | 3.33.E+07         | 3.49.E+07         | 3.40.E+07         | 2.87.E+07            | 3.66.E+07            | 3.67.E+07            | 3.31.E+07            | 6.06.E+07            | 4.16.E+07            | 4.40.E+07            | 3.80.E+07            |
| 2714 | P55210-3  | Isoform Alpha' of Caspase-7 [OS=Homo sapiens]                                                | 2.168         | 1.60.E+06         | 1.44.E+06         | 1.56.E+06         | 1.44.E+06         | 2.24.E+06            | 2.62.E+06            | 2.37.E+06            | 2.54.E+06            | 3.23.E+06            | 2.62.E+06            | 2.58.E+06            | 2.40.E+06            |
| 2715 | Q5T2E6-1  | UPF0668 protein C10orf76 [OS=Homo sapiens]                                                   | 2.165         | 1.60.E+07         | 2.09.E+07         | 2.31.E+07         | 1.89.E+07         | 2.39.E+07            | 2.86.E+07            | 2.19.E+07            | 2.91.E+07            | 2.68.E+07            | 2.58.E+07            | 2.78.E+07            | 3.51.E+07            |
| 2716 | Q5TCY1-1  | Tau-tubulin kinase 1 [OS=Homo sapiens]                                                       | 2.143         | 2.45.E+06         | 2.22.E+06         | 1.59.E+06         | 2.51.E+06         | 3.68.E+06            | 4.00.E+06            | 3.45.E+06            | 3.72.E+06            | 1.09.E+06            | 2.43.E+06            | 2.20.E+06            | 2.16.E+06            |
| 2717 | Q9H4X1    | regulator of cell cycle RGCC [OS=Homo sapiens]                                               | 2.141         |                   |                   |                   |                   |                      |                      |                      |                      |                      |                      |                      |                      |
| 2718 | Q7Z7K0    | COX assembly mitochondrial protein homolog [OS=Homo sapiens]                                 | 2.139         | 1.19.E+07         | 1.13.E+07         | 1.17.E+07         | 1.56.E+07         | 1.35.E+07            | 1.51.E+07            | 1.43.E+07            | 1.61.E+07            | 1.27.E+07            | 1.15.E+07            | 1.20.E+07            | 1.17.E+07            |
| 2719 | Q02410    | Amyloid beta A4 precursor protein-binding family A member 1 [OS=Homo sapiens]                | 2.123         | 3.13.E+07         | 3.11.E+07         | 2.95.E+07         | 3.33.E+07         | 3.80.E+07            | 3.59.E+07            | 4.21.E+07            | 4.40.E+07            | 5.18.E+07            | 4.26.E+07            | 4.47.E+07            | 4.19.E+07            |
| 2720 | Q9UPT6    | C-Jun-amino-terminal kinase-interacting protein 3 [OS=Homo sapiens]                          | 2.098         | 8.54.E+05         | 1.01.E+06         | 1.05.E+06         | 1.07.E+06         | 1.16.E+06            | 1.12.E+06            | 1.06.E+06            | 9.13.E+05            | 6.31.E+05            | 8.06.E+05            | 5.99.E+05            | 6.47.E+05            |
| 2721 | P10636    | Microtubule-associated protein tau [OS=Homo sapiens]                                         | 2.094         |                   |                   |                   |                   |                      |                      |                      |                      |                      |                      |                      |                      |
| 2722 | Q9NRY5    | Protein FAM114A2 [OS=Homo sapiens]                                                           | 2.092         | 3.78.E+06         | 2.44.E+06         | 2.41.E+06         | 2.44.E+06         | 3.44.E+06            | 2.51.E+06            | 2.11.E+06            | 3.25.E+06            | 3.67.E+06            | 2.74.E+06            | 2.86.E+06            | 3.28.E+06            |
| 2723 | Q6UW02    | Cytochrome P450 20A1 [OS=Homo sapiens]                                                       | 2.081         |                   |                   |                   |                   |                      |                      |                      |                      |                      |                      |                      |                      |
| 2724 | Q70Z35-1  | Phosphatidylinositol 3,4,5-trisphosphate-dependent Rac exchanger 2 protein [OS=Homo sapiens] | 2.076         | 1.31.E+07         | 3.56.E+06         | 4.28.E+06         | 2.97.E+06         | 8.09.E+06            | 6.86.E+06            | 6.11.E+06            | 5.57.E+06            | 6.02.E+06            | 5.11.E+06            | 6.33.E+06            | 6.02.E+06            |
| 2725 | Q92834-6  | Isoform 6 of X-linked retinitis pigmentosa GTPase regulator [OS=Homo sapiens]                | 2.074         |                   |                   |                   |                   |                      |                      |                      |                      |                      |                      |                      |                      |
| 2726 | Q15527    | Surfeit locus protein 2 [OS=Homo sapiens]                                                    | 2.073         | 9.10.E+05         | 9.15.E+05         | 1.02.E+06         | 1.03.E+06         | 1.53.E+06            | 1.52.E+06            | 1.52.E+06            | 1.42.E+06            | 1.08.E+06            | 8.78.E+05            | 7.89.E+05            | 9.91.E+05            |
| 2727 | Q17RC7    | Exocyst complex component 3-like protein 4 [OS=Homo sapiens]                                 | 2.056         | 1.82.E+08         | 1.85.E+08         | 1.81.E+08         | 1.88.E+08         | 1.77.E+08            | 1.68.E+08            | 1.76.E+08            | 1.84.E+08            | 1.96.E+08            | 1.88.E+08            | 1.88.E+08            | 1.86.E+08            |
| 2728 | Q9UFN0    | Protein NipSnap homolog 3A OS=Homo sapiens OX=9606 GN=NIPSNAP3A PE=1 SV=2                    | 2.054         | 1.87.E+07         | 2.00.E+07         | 2.15.E+07         | 2.40.E+07         | 2.21.E+07            | 2.24.E+07            | 2.18.E+07            | 2.24.E+07            | 2.45.E+07            | 2.12.E+07            | 2.15.E+07            | 1.96.E+07            |
| 2729 | Q5T5Y3-3  | Isoform 3 of Calmodulin-regulated spectrin-associated protein 1 [OS=Homo sapiens]            | 2.053         |                   |                   |                   |                   |                      |                      |                      |                      |                      |                      |                      |                      |
| 2730 | Q9BXT2    | voltage-dependent calcium channel gamma-6 subunit [OS=Homo sapiens]                          | 2.043         | 2.61.E+08         | 2.42.E+08         | 2.58.E+08         | 2.69.E+08         | 2.73.E+08            | 2.75.E+08            | 2.77.E+08            | 2.85.E+08            | 2.58.E+08            | 2.42.E+08            | 2.39.E+08            | 2.48.E+08            |
| 2731 | P56524    | Histone deacetylase 4 [OS=Homo sapiens]                                                      | 2.036         |                   |                   |                   |                   |                      |                      |                      |                      |                      |                      |                      |                      |
| 2732 | Q96BX8    | MOB kinase activator 3A [OS=Homo sapiens]                                                    | 2.03          | 1.58.E+08         | 1.78.E+08         | 1.85.E+08         | 1.76.E+08         | 1.18.E+08            | 1.29.E+08            | 1.36.E+08            | 1.23.E+08            | 1.00.E+08            | 1.12.E+08            | 1.01.E+08            | 9.70.E+07            |
| 2733 | A6NK59    | Ankyrin repeat and SOCS box protein 14 [OS=Homo sapiens]                                     | 2.024         |                   |                   |                   |                   |                      |                      |                      |                      |                      |                      |                      |                      |
| 2734 | A6NLU0    | Ret finger protein-like 4A [OS=Homo sapiens]                                                 | 2.023         | 6.32.E+05         |                   |                   |                   | 9.88.E+05            | 1.73.E+06            |                      |                      | 9.10.E+05            |                      |                      |                      |
| 2735 | Q96RN5    | Mediator of RNA polymerase II transcription subunit 15 [OS=Homo sapiens]                     | 2.017         | 8.74.E+06         | 1.28.E+07         | 1.39.E+07         | 1.27.E+07         |                      |                      |                      |                      | 9.31.E+06            |                      | 6.10.E+06            | 6.38.E+06            |
| 2736 | Q6F5E8    | capping protein, Arp2/3 and myosin-I linker protein 2 [OS=Homo sapiens]                      | 1.991         | 3.21.E+07         | 3.72.E+07         | 3.39.E+07         | 3.81.E+07         | 5.29.E+07            | 5.71.E+07            | 5.35.E+07            | 6.10.E+07            | 4.00.E+07            | 4.84.E+07            | 4.91.E+07            | 4.81.E+07            |
| 2737 | Q96RS6    | NudC domain-containing protein 1 [OS=Homo sapiens]                                           | 1.99          | 1.84.E+07         | 1.90.E+07         | 2.26.E+07         | 1.83.E+07         | 1.38.E+07            | 2.00.E+07            | 1.92.E+07            | 2.07.E+07            | 2.94.E+07            | 2.41.E+07            | 2.56.E+07            | 2.81.E+07            |
| 2738 | P51610-4  | Isoform 4 of Host cell factor 1 [OS=Homo sapiens]                                            | 1.985         | 1.20.E+07         | 1.37.E+07         |                   | 1.56.E+07         |                      | 1.15.E+07            | 1.02.E+07            | 1.25.E+07            | 1.28.E+07            | 1.59.E+07            | 1.56.E+07            | 1.49.E+07            |
| 2739 | P20585    | DNA mismatch repair protein MSH3 [OS=Homo sapiens]                                           | 1.98          |                   | 3.80.E+06         | 3.38.E+06         | 1.85.E+06         | 2.45.E+06            | 2.76.E+06            | 1.64.E+06            | 3.30.E+06            | 1.55.E+06            | 1.55.E+06            | 3.68.E+06            | 3.34.E+06            |
| 2740 | O15050    | TPR and ankyrin repeat-containing protein 1 [OS=Homo sapiens]                                | 1.974         |                   |                   |                   |                   |                      |                      |                      |                      |                      |                      |                      |                      |
| 2741 | Q8N4H5    | mitochondrial import receptor subunit TOM5 homolog [OS=Homo sapiens]                         | 1.973         | 9.46.E+07         | 8.92.E+07         | 9.00.E+07         | 8.39.E+07         | 9.06.E+07            | 8.17.E+07            | 8.47.E+07            | 8.98.E+07            | 8.38.E+07            | 7.42.E+07            | 7.63.E+07            | 7.57.E+07            |
| 2742 | Q9P265    | Disco-interacting protein 2 homolog B [OS=Homo sapiens]                                      | 1.96          |                   |                   |                   |                   |                      |                      |                      |                      |                      |                      |                      |                      |
| 2743 | Q9BQL6-1  | Fermitin family homolog 1 [OS=Homo sapiens]                                                  | 1.938         |                   |                   |                   |                   |                      |                      |                      |                      |                      |                      |                      |                      |

Supplemental Data 1. List of identified proteins

| No.  | Accession | Description                                                                        | Sum PEP Score | CTRL Abundances_1 | CTRL Abundances_2 | CTRL Abundances_3 | CTRL Abundances_4 | CLDN6-1 Abundances_1 | CLDN6-1 Abundances_2 | CLDN6-1 Abundances_3 | CLDN6-1 Abundances_4 | CLDN6-2 Abundances_1 | CLDN6-2 Abundances_2 | CLDN6-2 Abundances_3 | CLDN6-2 Abundances_4 |
|------|-----------|------------------------------------------------------------------------------------|---------------|-------------------|-------------------|-------------------|-------------------|----------------------|----------------------|----------------------|----------------------|----------------------|----------------------|----------------------|----------------------|
| 2744 | Q13541    | Eukaryotic translation initiation factor 4E-binding protein 1 [OS=Homo sapiens]    | 1.931         | 5.52.E+07         | 5.02.E+07         | 5.29.E+07         | 4.90.E+07         | 4.31.E+07            | 4.98.E+07            | 4.54.E+07            | 4.90.E+07            | 3.26.E+07            | 3.89.E+07            | 3.74.E+07            | 3.65.E+07            |
| 2745 | Q5T011    | KICSTOR complex protein SZT2 [OS=Homo sapiens]                                     | 1.929         | 2.42.E+06         |                   |                   |                   | 8.64.E+06            | 6.97.E+06            | 7.27.E+06            | 6.96.E+06            | 5.32.E+06            | 4.15.E+06            | 4.11.E+06            | 9.98.E+06            |
| 2746 | P15498-1  | Proto-oncogene vav [OS=Homo sapiens]                                               | 1.911         |                   |                   |                   |                   |                      |                      |                      |                      |                      |                      |                      |                      |
| 2747 | A6PVI3    | Nuclear cap-binding protein subunit 2-like [OS=Homo sapiens]                       | 1.911         |                   |                   |                   |                   |                      |                      |                      |                      |                      |                      |                      |                      |
| 2748 | A6NDG6    | glycerol-3-phosphate phosphatase [OS=Homo sapiens]                                 | 1.905         | 6.44.E+07         | 7.94.E+07         | 7.08.E+07         |                   | 6.17.E+07            | 6.15.E+07            | 5.51.E+07            | 7.20.E+07            | 6.10.E+07            |                      | 7.43.E+07            | 6.35.E+07            |
| 2749 | Q43194    | G-protein coupled receptor 39 [OS=Homo sapiens]                                    | 1.898         |                   |                   |                   |                   |                      |                      |                      |                      |                      |                      |                      |                      |
| 2750 | Q6UWT4    | Uncharacterized protein C5orf46 OS=Homo sapiens OX=9606 GN=C5orf46 PE=3 SV=2       | 1.898         |                   |                   |                   |                   |                      |                      |                      |                      |                      |                      |                      |                      |
| 2751 | P00451    | Coagulation factor VIII [OS=Homo sapiens]                                          | 1.888         |                   |                   |                   |                   |                      |                      |                      |                      |                      |                      |                      |                      |
| 2752 | P0C1Z6    | TCF3 fusion partner [OS=Homo sapiens]                                              | 1.887         | 1.26.E+07         | 1.22.E+07         | 1.13.E+07         | 1.32.E+07         | 5.41.E+07            | 5.49.E+07            | 5.60.E+07            | 5.11.E+07            | 1.22.E+07            | 1.28.E+07            | 1.11.E+07            | 1.15.E+07            |
| 2753 | Q9Y4A5    | Transformation/transcription domain-associated protein [OS=Homo sapiens]           | 1.887         | 7.83.E+07         | 8.80.E+07         | 8.54.E+07         | 9.69.E+07         | 1.12.E+08            | 1.16.E+08            | 1.19.E+08            | 1.22.E+08            | 9.90.E+07            | 9.22.E+07            | 9.22.E+07            | 7.93.E+07            |
| 2754 | Q8TD43-1  | Transient receptor potential cation channel subfamily M member 4 [OS=Homo sapiens] | 1.88          | 2.80.E+07         | 2.96.E+07         | 3.09.E+07         | 2.79.E+07         | 2.52.E+07            | 2.41.E+07            | 2.55.E+07            | 2.53.E+07            | 2.34.E+07            | 2.58.E+07            | 2.50.E+07            | 2.43.E+07            |
| 2755 | P49366-1  | deoxyhypusine synthase [OS=Homo sapiens]                                           | 1.876         | 2.97.E+06         | 2.77.E+06         | 2.67.E+06         | 2.93.E+06         |                      |                      |                      |                      | 1.33.E+06            | 9.19.E+05            | 3.11.E+05            |                      |
| 2756 | Q95139    | NADH dehydrogenase [ubiquinone] 1 beta subcomplex subunit 6 [OS=Homo sapiens]      | 1.875         | 4.59.E+06         | 5.50.E+06         | 4.24.E+06         | 5.22.E+06         | 2.48.E+06            | 1.46.E+06            | 3.83.E+06            | 1.41.E+06            | 2.79.E+06            | 2.35.E+06            | 1.44.E+06            | 2.03.E+06            |
| 2757 | Q92820    | Gamma-glutamyl hydrolase [OS=Homo sapiens]                                         | 1.875         | 3.30.E+06         | 3.18.E+06         | 2.61.E+06         | 3.31.E+06         | 2.01.E+06            | 1.25.E+06            | 1.38.E+06            | 1.28.E+06            | 3.36.E+06            | 2.43.E+06            | 2.23.E+06            | 2.27.E+06            |
| 2758 | Q6P1S2-1  | Protein C3orf33 [OS=Homo sapiens]                                                  | 1.875         | 2.49.E+07         | 2.14.E+07         | 1.20.E+07         | 4.35.E+07         | 3.86.E+07            | 3.67.E+07            | 3.23.E+07            | 2.72.E+07            | 4.64.E+07            | 2.32.E+07            | 2.36.E+07            | 3.78.E+07            |
| 2759 | Q9P0U1    | Mitochondrial import receptor subunit TOM7 homolog [OS=Homo sapiens]               | 1.873         | 2.30.E+07         | 2.07.E+07         | 2.13.E+07         | 2.27.E+07         | 2.54.E+07            | 2.46.E+07            | 2.46.E+07            | 2.79.E+07            | 2.03.E+07            | 2.10.E+07            | 2.53.E+07            | 2.45.E+07            |
| 2760 | Q9P0V3-1  | SH3 domain-binding protein 4 [OS=Homo sapiens]                                     | 1.871         | 4.28.E+06         | 2.04.E+06         | 3.34.E+05         | 4.81.E+05         | 3.97.E+06            | 3.07.E+06            | 2.59.E+06            | 2.58.E+06            | 3.09.E+06            | 3.66.E+06            | 3.22.E+06            | 3.07.E+06            |
| 2761 | Q9H0A6    | RING finger protein 32 [OS=Homo sapiens]                                           | 1.857         | 8.61.E+06         | 7.35.E+06         | 7.77.E+06         | 1.02.E+07         | 1.19.E+07            | 9.89.E+06            | 1.04.E+07            | 1.17.E+07            | 1.10.E+07            | 8.10.E+06            | 9.48.E+06            | 8.18.E+06            |
| 2762 | Q9ULX3    | RNA-binding protein NOB1 [OS=Homo sapiens]                                         | 1.851         | 2.26.E+07         | 2.39.E+07         | 2.14.E+07         | 1.97.E+07         | 1.71.E+07            | 1.77.E+07            | 2.05.E+07            | 2.41.E+07            | 2.17.E+07            | 2.11.E+07            | 1.69.E+07            | 1.73.E+07            |
| 2763 | Q70EL4-1  | Ubiquitin carboxyl-terminal hydrolase 43 [OS=Homo sapiens]                         | 1.847         | 1.16.E+07         | 1.19.E+07         | 1.21.E+07         | 1.50.E+07         | 1.06.E+07            | 9.65.E+06            | 1.08.E+07            | 1.12.E+07            | 7.22.E+06            | 7.01.E+06            | 6.59.E+06            | 8.58.E+06            |
| 2764 | P49760-1  | Dual specificity protein kinase CLK2 [OS=Homo sapiens]                             | 1.84          |                   |                   |                   |                   |                      |                      |                      |                      |                      |                      |                      |                      |
| 2765 | P48307    | Tissue factor pathway inhibitor 2 [OS=Homo sapiens]                                | 1.81          | 1.88.E+07         | 2.03.E+07         | 2.24.E+07         | 2.15.E+07         | 1.85.E+07            | 2.29.E+07            | 1.97.E+07            | 2.20.E+07            | 1.74.E+07            | 2.29.E+07            | 2.02.E+07            | 2.23.E+07            |
| 2766 | Q9ULW0-2  | Isoform 2 of Targeting protein for Xklp2 [OS=Homo sapiens]                         | 1.798         |                   |                   |                   |                   |                      |                      |                      |                      |                      |                      |                      |                      |
| 2767 | A6NCW0    | Ubiquitin carboxyl-terminal hydrolase 17-like protein 3 [OS=Homo sapiens]          | 1.795         |                   |                   |                   |                   |                      |                      |                      |                      |                      |                      |                      |                      |
| 2768 | P02549-1  | spectrin alpha chain, erythrocytic 1 [OS=Homo sapiens]                             | 1.78          |                   |                   |                   |                   |                      |                      |                      |                      |                      |                      |                      |                      |
| 2769 | Q9BX66-1  | Sorbin and SH3 domain-containing protein 1 [OS=Homo sapiens]                       | 1.779         |                   |                   |                   |                   |                      |                      |                      |                      |                      |                      |                      |                      |
| 2770 | Q9C0D0    | Phosphatase and actin regulator 1 [OS=Homo sapiens]                                | 1.772         | 6.01.E+06         | 2.21.E+07         | 1.45.E+07         |                   |                      |                      | 7.88.E+06            | 5.75.E+06            | 2.44.E+07            | 2.89.E+07            | 2.71.E+07            | 1.24.E+07            |
| 2771 | Q8N317-1  | Bardet-Biedl syndrome 5 protein [OS=Homo sapiens]                                  | 1.768         | 1.97.E+07         | 2.68.E+07         | 2.85.E+07         | 3.30.E+07         | 2.88.E+07            | 2.82.E+07            | 3.37.E+07            | 2.80.E+07            | 2.93.E+07            | 3.01.E+07            | 2.81.E+07            | 3.12.E+07            |
| 2772 | Q6ZNB6-1  | nf-x1-type zinc finger protein nfx1 [OS=Homo sapiens]                              | 1.758         | 5.75.E+05         | 5.48.E+05         | 5.92.E+05         | 4.59.E+05         | 8.61.E+05            | 6.23.E+05            | 6.61.E+05            | 4.11.E+05            | 6.01.E+05            | 7.26.E+05            | 4.93.E+05            | 3.34.E+05            |
| 2773 | Q8WVM7    | Cohesin subunit SA-1 [OS=Homo sapiens]                                             | 1.749         |                   |                   |                   |                   |                      |                      |                      |                      |                      |                      |                      |                      |
| 2774 | P41212    | Transcription factor ETV6 [OS=Homo sapiens]                                        | 1.747         | 6.50.E+05         | 1.12.E+06         | 8.92.E+05         | 6.70.E+05         | 1.70.E+06            | 1.72.E+06            | 1.62.E+06            | 1.67.E+06            | 1.28.E+06            | 1.15.E+06            | 6.55.E+05            | 8.53.E+05            |
| 2775 | Q92523    | Carnitine O-palmitoyltransferase 1, muscle isoform [OS=Homo sapiens]               | 1.739         | 1.96.E+06         | 1.02.E+06         | 1.41.E+06         | 1.84.E+06         | 2.51.E+06            | 2.13.E+06            | 2.01.E+06            | 2.03.E+06            |                      | 1.35.E+06            | 1.93.E+06            | 1.11.E+06            |
| 2776 | O43719    | HIV Tat-specific factor 1 [OS=Homo sapiens]                                        | 1.731         | 2.44.E+06         | 2.56.E+06         | 2.28.E+06         | 2.99.E+06         | 1.12.E+06            | 1.73.E+06            | 2.00.E+06            | 6.53.E+05            | 2.22.E+06            | 2.52.E+06            | 2.16.E+06            | 1.66.E+06            |
| 2777 | Q9UKW6-1  | ETS-related transcription factor E1f-5 [OS=Homo sapiens]                           | 1.729         | 2.73.E+06         | 2.90.E+06         | 3.27.E+06         | 2.39.E+06         | 4.33.E+06            | 3.36.E+06            | 2.84.E+06            | 1.94.E+06            | 1.84.E+06            | 2.36.E+06            | 2.39.E+06            | 1.84.E+06            |
| 2778 | Q86YT9-1  | Junctional adhesion molecule-like [OS=Homo sapiens]                                | 1.729         | 1.46.E+06         | 1.54.E+06         | 1.59.E+06         | 2.06.E+06         | 2.06.E+06            | 2.21.E+06            | 1.84.E+06            | 1.72.E+06            | 1.50.E+06            | 1.67.E+06            | 1.62.E+06            | 1.59.E+06            |
| 2779 | Q15406    | Nuclear receptor subfamily 6 group A member 1 [OS=Homo sapiens]                    | 1.728         | 8.85.E+07         | 9.06.E+07         | 9.76.E+07         | 9.30.E+07         | 8.41.E+07            | 8.62.E+07            | 8.42.E+07            | 8.82.E+07            | 8.84.E+07            | 8.56.E+07            | 8.11.E+07            | 8.05.E+07            |
| 2780 | Q0D2K0-1  | Magnesium transporter NIPA4 [OS=Homo sapiens]                                      | 1.72          | 5.93.E+08         | 5.60.E+08         | 6.76.E+08         | 6.63.E+08         | 7.65.E+08            | 7.67.E+08            | 8.01.E+08            | 9.31.E+08            | 5.78.E+08            | 6.87.E+08            | 7.48.E+08            | 7.79.E+08            |
| 2781 | P31321    | cAMP-dependent protein kinase type I-beta regulatory subunit [OS=Homo sapiens]     | 1.711         |                   |                   |                   |                   |                      |                      |                      |                      |                      |                      |                      |                      |
| 2782 | O43663-1  | Protein regulator of cytokinesis 1 [OS=Homo sapiens]                               | 1.699         | 1.81.E+07         | 1.89.E+07         | 1.70.E+07         | 1.73.E+07         | 1.36.E+07            | 1.42.E+07            | 1.25.E+07            | 1.47.E+07            | 2.01.E+07            | 1.96.E+07            | 1.61.E+07            | 1.85.E+07            |
| 2783 | Q13972-1  | Ras-specific guanine nucleotide-releasing factor 1 [OS=Homo sapiens]               | 1.687         | 6.53.E+05         | 1.62.E+06         | 2.22.E+06         | 2.38.E+06         | 1.68.E+06            | 2.40.E+06            | 2.76.E+06            | 3.46.E+06            | 1.44.E+06            | 2.18.E+06            | 1.59.E+06            | 1.70.E+06            |
| 2784 | Q86Y82    | Syntaxin-12 [OS=Homo sapiens]                                                      | 1.684         |                   |                   |                   |                   |                      |                      |                      |                      |                      |                      |                      |                      |
| 2785 | Q9Y2D5    | A-kinase anchor protein 2 [OS=Homo sapiens]                                        | 1.683         |                   |                   |                   |                   |                      |                      |                      |                      |                      |                      |                      |                      |
| 2786 | Q14188    | Transcription factor Dp-2 [OS=Homo sapiens]                                        | 1.67          | 7.05.E+06         | 7.17.E+06         |                   |                   | 1.05.E+07            |                      |                      |                      | 1.10.E+07            | 9.28.E+06            | 8.06.E+06            | 8.12.E+06            |
| 2787 | P35568    | Insulin receptor substrate 1 [OS=Homo sapiens]                                     | 1.665         |                   |                   |                   |                   |                      |                      |                      |                      |                      |                      |                      |                      |
| 2788 | P11047    | Laminin subunit gamma-1 [OS=Homo sapiens]                                          | 1.663         | 1.07.E+07         |                   | 4.51.E+06         | 4.59.E+06         | 6.64.E+06            |                      | 6.25.E+06            |                      | 7.09.E+06            |                      |                      |                      |
| 2789 | P48509    | CD151 antigen [OS=Homo sapiens]                                                    | 1.657         | 3.05.E+06         | 2.30.E+06         | 2.19.E+06         | 3.60.E+06         | 4.47.E+06            | 2.32.E+06            | 2.52.E+06            | 2.97.E+06            | 2.78.E+06            | 1.88.E+06            | 1.70.E+06            | 1.74.E+06            |
| 2790 | A4UGR9    | Xin actin-binding repeat-containing protein 2 [OS=Homo sapiens]                    | 1.65          | 9.15.E+06         | 8.44.E+06         | 7.25.E+06         | 9.04.E+06         | 1.36.E+07            | 1.20.E+07            | 1.29.E+07            | 1.19.E+07            | 8.18.E+06            | 6.86.E+06            | 7.32.E+06            | 6.89.E+06            |
| 2791 | Q9UKN7    | Unconventional myosin-XV [OS=Homo sapiens]                                         | 1.644         | 1.28.E+06         | 2.50.E+06         | 2.10.E+06         | 2.16.E+06         | 3.72.E+06            | 2.32.E+06            | 3.68.E+06            | 3.27.E+06            | 3.02.E+06            | 2.40.E+06            | 3.04.E+06            | 3.04.E+06            |
| 2792 | Q13393-1  | Phospholipase D1 [OS=Homo sapiens]                                                 | 1.616         | 6.47.E+07         | 7.04.E+07         | 6.95.E+07         | 8.60.E+07         | 9.96.E+07            | 9.92.E+07            | 1.02.E+08            | 9.37.E+07            | 7.39.E+07            | 7.15.E+07            | 6.93.E+07            | 7.27.E+07            |
| 2793 | Q13033    | Striatin-3 [OS=Homo sapiens]                                                       | 1.616         |                   | 3.84.E+07         |                   |                   | 4.86.E+07            | 6.93.E+07            | 4.68.E+07            | 3.37.E+07            | 5.26.E+07            | 7.67.E+07            | 4.69.E+07            | 7.75.E+07            |
| 2794 | Q5TBB1    | ribonuclease h2 subunit b [OS=Homo sapiens]                                        | 1.613         |                   |                   |                   |                   |                      |                      |                      |                      |                      |                      |                      |                      |
| 2795 | Q13002    | Glutamate receptor ionotropic, kainate 2 [OS=Homo sapiens]                         | 1.587         | 1.30.E+08         | 1.26.E+08         | 1.25.E+08         | 1.32.E+08         | 1.36.E+08            | 1.34.E+08            | 1.38.E+08            | 1.30.E+08            | 1.39.E+08            | 1.35.E+08            | 1.46.E+08            | 1.66.E+08            |
| 2796 | Q8N7K0-1  | Zinc finger protein 433 [OS=Homo sapiens]                                          | 1.576         | 3.52.E+05         | 2.90.E+05         | 6.89.E+04         | 8.43.E+04         | 4.88.E+05            |                      | 4.53.E+05            | 4.89.E+05            | 2.47.E+05            | 2.63.E+05            | 2.53.E+05            | 3.32.E+05            |
| 2797 | Q08722    | Leukocyte surface antigen CD47 [OS=Homo sapiens]                                   | 1.567         |                   | 2.79.E+07         | 3.04.E+07         | 3.16.E+07         | 3.61.E+07            | 3.53.E+07            | 3.81.E+07            | 4.07.E+07            | 2.61.E+07            | 2.47.E+07            | 2.38.E+07            | 2.52.E+07            |
| 2798 | O75445    | usherin [OS=Homo sapiens]                                                          | 1.547         | 2.21.E+07         | 2.42.E+07         | 3.53.E+07         | 4.58.E+07         | 3.97.E+07            | 6.04.E+07            |                      |                      | 2.78.E+07            | 3.74.E+07            | 3.61.E+07            | 3.36.E+07            |

Supplemental Data 1. List of identified proteins

| No.  | Accession | Description                                                                                                         | Sum PEP Score | CTRL Abundances_1 | CTRL Abundances_2 | CTRL Abundances_3 | CTRL Abundances_4 | CLDN6-1 Abundances_1 | CLDN6-1 Abundances_2 | CLDN6-1 Abundances_3 | CLDN6-1 Abundances_4 | CLDN6-2 Abundances_1 | CLDN6-2 Abundances_2 | CLDN6-2 Abundances_3 | CLDN6-2 Abundances_4 |
|------|-----------|---------------------------------------------------------------------------------------------------------------------|---------------|-------------------|-------------------|-------------------|-------------------|----------------------|----------------------|----------------------|----------------------|----------------------|----------------------|----------------------|----------------------|
| 2799 | Q68CQ1-7  | Maestro heat-like repeat-containing protein family member 7 [OS=Homo sapiens]                                       | 1.547         |                   |                   |                   |                   |                      |                      |                      |                      |                      |                      |                      |                      |
| 2800 | Q15582    | Transforming growth factor-beta-induced protein ig-h3 [OS=Homo sapiens]                                             | 1.541         |                   |                   |                   |                   |                      |                      |                      |                      | 4.67.E+06            | 5.33.E+06            | 6.41.E+05            | 8.30.E+06            |
| 2801 | Q96AE7    | Tetratricopeptide repeat protein 17 [OS=Homo sapiens]                                                               | 1.531         | 4.71.E+07         | 4.53.E+07         | 3.94.E+07         | 4.86.E+07         | 6.92.E+07            | 5.25.E+07            | 5.73.E+07            | 7.64.E+07            | 7.07.E+07            | 4.61.E+07            | 5.51.E+07            | 4.91.E+07            |
| 2802 | Q96FE5    | Leucine-rich repeat and immunoglobulin-like domain-containing nogo receptor-interacting protein 1 [OS=Homo sapiens] | 1.49          | 5.18.E+06         | 4.86.E+06         | 5.00.E+06         | 5.55.E+06         | 9.29.E+06            | 8.56.E+06            | 7.98.E+06            | 6.46.E+06            | 3.62.E+06            | 3.89.E+06            | 3.78.E+06            | 3.52.E+06            |
| 2803 | Q502W7    | Coiled-coil domain-containing protein 38 [OS=Homo sapiens]                                                          | 1.487         | 2.31.E+06         | 7.67.E+05         | 2.55.E+06         | 2.06.E+06         |                      | 1.68.E+06            | 1.10.E+06            | 7.93.E+05            | 9.22.E+05            | 1.45.E+06            | 1.28.E+06            | 1.16.E+06            |
| 2804 | A8MZF0    | Proline-rich protein 33 [OS=Homo sapiens]                                                                           | 1.477         | 6.21.E+05         | 5.78.E+05         | 7.29.E+05         | 6.71.E+05         | 9.01.E+05            | 1.04.E+06            | 8.79.E+05            | 9.29.E+05            | 7.52.E+05            | 7.96.E+05            | 6.12.E+05            | 6.16.E+05            |
| 2805 | Q9C0H9-5  | Isoform 4 of SRC kinase signaling inhibitor 1 [OS=Homo sapiens]                                                     | 1.47          | 5.74.E+07         | 5.20.E+07         | 5.80.E+07         | 5.78.E+07         | 7.82.E+07            | 7.18.E+07            | 6.62.E+07            | 7.66.E+07            | 7.35.E+07            | 7.29.E+07            | 8.13.E+07            | 7.37.E+07            |
| 2806 | Q04725    | Transducin-like enhancer protein 2 [OS=Homo sapiens]                                                                | 1.454         | 1.90.E+06         | 1.71.E+06         | 1.86.E+06         | 2.20.E+06         | 3.45.E+06            | 3.14.E+06            | 3.42.E+06            | 2.74.E+06            | 2.34.E+06            | 2.37.E+06            | 2.20.E+06            | 2.24.E+06            |
| 2807 | Q6UW68    | Transmembrane protein 205 [OS=Homo sapiens]                                                                         | 1.451         | 2.37.E+07         | 2.72.E+07         | 2.77.E+07         | 2.55.E+07         | 1.70.E+07            | 1.48.E+07            | 1.42.E+07            | 1.64.E+07            | 2.92.E+07            | 3.16.E+07            | 3.22.E+07            | 3.48.E+07            |
| 2808 | P84550    | SKI family transcriptional corepressor 1 [OS=Homo sapiens]                                                          | 1.411         | 2.44.E+06         | 2.27.E+06         | 4.46.E+06         | 4.02.E+06         | 4.23.E+06            | 4.05.E+06            | 4.16.E+06            | 6.23.E+06            | 3.63.E+06            | 3.36.E+06            | 3.16.E+06            | 3.74.E+06            |
| 2809 | Q16698    | 2,4-dienoyl-CoA reductase, mitochondrial [OS=Homo sapiens]                                                          | 1.405         | 3.67.E+07         | 3.22.E+07         | 3.27.E+07         | 3.06.E+07         | 2.11.E+07            | 2.07.E+07            | 1.82.E+07            | 2.23.E+07            | 3.06.E+07            | 2.89.E+07            |                      | 2.52.E+07            |
| 2810 | Q92503-1  | SEC14-like protein 1 [OS=Homo sapiens]                                                                              | 1.397         |                   |                   |                   |                   |                      |                      |                      |                      |                      |                      |                      |                      |
| 2811 | Q9HCM2    | Plexin-A4 [OS=Homo sapiens]                                                                                         | 1.39          |                   |                   |                   |                   |                      |                      |                      |                      |                      |                      |                      |                      |
| 2812 | Q9BSH5    | Haloacid dehalogenase-like hydrolase domain-containing protein 3 [OS=Homo sapiens]                                  | 1.386         | 6.92.E+06         | 7.62.E+06         | 7.98.E+06         |                   |                      | 6.91.E+06            | 4.29.E+06            | 6.24.E+06            | 7.30.E+06            | 7.70.E+06            |                      | 8.89.E+06            |
| 2813 | P51617    | interleukin-1 receptor-associated kinase 1 [OS=Homo sapiens]                                                        | 1.383         | 1.91.E+06         | 1.27.E+06         | 1.30.E+06         | 1.86.E+06         | 2.65.E+06            | 2.07.E+06            | 2.41.E+06            | 2.03.E+06            | 1.78.E+06            | 1.83.E+06            | 1.86.E+06            | 1.62.E+06            |
| 2814 | Q6ZNE9-2  | RUN and FYVE domain-containing protein 4 [OS=Homo sapiens]                                                          | 1.377         | 3.59.E+06         | 3.61.E+06         | 4.04.E+06         | 4.50.E+06         | 5.32.E+06            | 5.25.E+06            | 5.06.E+06            | 4.81.E+06            | 3.83.E+06            | 3.60.E+06            | 3.56.E+06            | 3.63.E+06            |
| 2815 | Q9Y2H5    | Pleckstrin homology domain-containing family A member 6 [OS=Homo sapiens]                                           | 1.371         | 4.76.E+06         | 4.75.E+06         | 4.55.E+06         | 6.53.E+06         | 5.79.E+06            | 5.18.E+06            | 5.29.E+06            | 4.04.E+06            | 3.85.E+06            | 3.81.E+06            | 4.14.E+06            | 4.41.E+06            |
| 2816 | Q96A26    | Protein FAM162A [OS=Homo sapiens]                                                                                   | 1.362         | 3.03.E+07         | 3.15.E+07         | 2.85.E+07         | 3.01.E+07         | 2.80.E+07            | 3.01.E+07            | 2.88.E+07            | 3.49.E+07            | 2.73.E+07            | 2.98.E+07            | 2.78.E+07            | 2.75.E+07            |
| 2817 | P42695    | condensin-2 complex subunit D3 [OS=Homo sapiens]                                                                    | 1.361         | 2.50.E+05         | 1.09.E+06         | 1.89.E+06         | 2.62.E+06         | 2.00.E+06            | 1.96.E+06            | 1.95.E+06            | 1.19.E+06            | 1.15.E+06            | 1.05.E+06            | 1.03.E+06            | 8.19.E+05            |
| 2818 | Q16853    | Membrane primary amine oxidase [OS=Homo sapiens]                                                                    | 1.36          | 5.09.E+06         | 5.34.E+06         | 5.44.E+06         | 6.30.E+06         | 7.15.E+06            | 7.35.E+06            | 7.67.E+06            | 6.88.E+06            | 6.98.E+06            | 6.93.E+06            | 6.30.E+06            | 6.22.E+06            |
| 2819 | O75592    | E3 ubiquitin-protein ligase MYCBP2 OS=Homo sapiens OX=9606 GN=MYCBP2 PE=1 SV=4                                      | 1.348         |                   |                   |                   |                   |                      |                      |                      |                      |                      |                      |                      |                      |
| 2820 | P21399    | Cytoplasmic aconitate hydratase [OS=Homo sapiens]                                                                   | 1.339         |                   |                   |                   |                   |                      |                      |                      |                      |                      |                      |                      |                      |
| 2821 | O14578    | Citron Rho-interacting kinase [OS=Homo sapiens]                                                                     | 1.306         | 2.48.E+06         | 2.30.E+06         | 2.43.E+06         | 2.87.E+06         | 4.05.E+06            | 4.25.E+06            | 3.85.E+06            | 3.79.E+06            | 2.33.E+06            | 1.94.E+06            | 1.78.E+06            | 1.70.E+06            |
| 2822 | Q9P013    | spliceosome-associated protein CWC15 homolog [OS=Homo sapiens]                                                      | 1.305         | 2.36.E+07         | 2.56.E+07         | 3.39.E+07         | 3.08.E+07         | 2.26.E+07            | 2.42.E+07            | 2.19.E+07            | 2.45.E+07            | 2.70.E+07            | 3.57.E+07            | 3.04.E+07            | 3.44.E+07            |
| 2823 | Q6ZTR5    | Cilia- and flagella-associated protein 47 OS=Homo sapiens OX=9606 GN=CFAP47 PE=2 SV=5                               | 1.305         |                   |                   |                   |                   |                      |                      |                      |                      |                      |                      |                      |                      |
| 2824 | O60883    | G-protein coupled receptor 37-like 1 OS=Homo sapiens OX=9606 GN=GPR37L1 PE=1 SV=2                                   | 1.301         |                   |                   |                   |                   |                      |                      |                      |                      |                      |                      |                      |                      |
| 2825 | Q5VZE5    | N-alpha-acetyltransferase 35, NatC auxiliary subunit [OS=Homo sapiens]                                              | 1.3           |                   |                   |                   |                   |                      |                      |                      |                      |                      |                      |                      |                      |
| 2826 | Q9UBP9    | PTB domain-containing engulfment adapter protein 1 [OS=Homo sapiens]                                                | 1.292         | 5.10.E+07         | 5.61.E+07         | 4.55.E+07         | 4.95.E+07         | 7.06.E+07            | 7.54.E+07            | 5.82.E+07            | 6.39.E+07            | 5.44.E+07            | 5.94.E+07            | 6.05.E+07            | 5.78.E+07            |
| 2827 | Q9C0B6    | BMP/retinoic acid-inducible neural-specific protein 2 [OS=Homo sapiens]                                             | 1.291         | 1.05.E+07         |                   | 1.26.E+07         | 1.74.E+07         | 1.97.E+07            | 2.03.E+07            | 1.54.E+07            | 3.07.E+07            | 1.66.E+07            | 1.55.E+07            | 2.15.E+07            | 2.10.E+07            |
| 2828 | Q9H845    | Acyl-CoA dehydrogenase family member 9, mitochondrial [OS=Homo sapiens]                                             | 1.284         | 9.28.E+06         | 7.68.E+06         |                   | 3.77.E+06         |                      |                      |                      |                      |                      |                      | 5.16.E+06            | 1.17.E+07            |
| 2829 | Q96CV9    | Optineurin OS=Homo sapiens OX=9606 GN=OPTN PE=1 SV=3                                                                | 1.278         | 6.87.E+05         | 9.07.E+05         | 1.47.E+06         | 1.47.E+06         | 1.06.E+06            | 1.58.E+06            | 7.85.E+05            | 1.70.E+06            | 1.32.E+06            | 1.06.E+06            | 1.67.E+06            | 1.82.E+06            |
| 2830 | O75970    | multiple PDZ domain protein [OS=Homo sapiens]                                                                       | 1.277         |                   |                   |                   |                   |                      |                      |                      |                      |                      |                      |                      |                      |
| 2831 | Q16584    | mitogen-activated protein kinase kinase 11 [OS=Homo sapiens]                                                        | 1.27          |                   |                   | 6.51.E+07         |                   | 7.29.E+07            | 7.31.E+07            | 7.28.E+07            | 7.63.E+07            | 5.45.E+07            | 6.35.E+07            | 6.60.E+07            | 6.18.E+07            |
| 2832 | P55809    | Succinyl-CoA:3-ketoacid coenzyme A transferase 1, mitochondrial [OS=Homo sapiens]                                   | 1.268         |                   |                   |                   |                   |                      |                      |                      |                      |                      |                      |                      |                      |
| 2833 | P0C091    | FRAS1-related extracellular matrix protein 3 [OS=Homo sapiens]                                                      | 1.266         |                   |                   |                   |                   |                      |                      |                      |                      |                      |                      |                      |                      |
| 2834 | Q9NR09    | Baculoviral IAP repeat-containing protein 6 [OS=Homo sapiens]                                                       | 1.26          | 7.32.E+06         | 8.71.E+06         | 7.61.E+06         | 7.71.E+06         | 6.90.E+06            | 7.50.E+06            | 6.74.E+06            | 5.31.E+06            | 5.61.E+06            | 8.04.E+06            | 6.25.E+06            | 7.12.E+06            |
| 2835 | Q6UY01    | Leucine-rich repeat-containing protein 31 [OS=Homo sapiens]                                                         | 1.246         | 7.01.E+06         | 4.83.E+06         | 4.43.E+06         | 3.80.E+06         | 6.10.E+06            | 7.06.E+06            | 5.83.E+06            | 4.96.E+06            | 5.38.E+06            | 6.59.E+06            | 5.51.E+06            | 5.07.E+06            |
| 2836 | Q16204    | coiled-coil domain-containing protein 6 [OS=Homo sapiens]                                                           | 1.235         | 4.26.E+07         | 4.07.E+07         | 3.61.E+07         | 4.41.E+07         | 3.88.E+07            | 4.54.E+07            | 4.38.E+07            | 4.53.E+07            | 5.60.E+07            | 4.34.E+07            | 3.45.E+07            | 6.24.E+07            |
| 2837 | Q9H4S2    | GS homeobox 1 [OS=Homo sapiens]                                                                                     | 1.235         | 1.70.E+06         | 1.66.E+06         |                   | 1.98.E+06         | 2.10.E+06            | 2.37.E+06            | 2.24.E+06            | 2.25.E+06            | 1.71.E+06            | 1.55.E+06            | 1.48.E+06            | 1.69.E+06            |
| 2838 | Q9BZG1    | Ras-related protein Rab-34 [OS=Homo sapiens]                                                                        | 1.232         | 8.59.E+05         | 9.01.E+05         | 1.15.E+06         | 1.19.E+06         | 1.34.E+06            | 1.45.E+06            | 1.39.E+06            | 1.43.E+06            | 1.19.E+06            | 1.11.E+06            | 1.07.E+06            | 1.14.E+06            |
| 2839 | P36404    | ADP-ribosylation factor-like protein 2 [OS=Homo sapiens]                                                            | 1.227         | 3.99.E+07         | 4.06.E+07         | 4.06.E+07         |                   | 4.37.E+07            |                      |                      | 2.27.E+07            |                      |                      | 4.14.E+07            |                      |
| 2840 | Q9NYK6-1  | Protein EURL homolog [OS=Homo sapiens]                                                                              | 1.221         |                   |                   |                   |                   |                      |                      |                      |                      |                      |                      |                      |                      |
| 2841 | Q6IC83    | uncharacterized protein C22orf42 [OS=Homo sapiens]                                                                  | 1.217         | 1.13.E+06         | 1.17.E+06         | 1.21.E+06         | 1.25.E+06         | 1.43.E+06            | 1.27.E+06            | 1.37.E+06            | 1.23.E+06            | 9.65.E+05            | 8.89.E+05            | 7.57.E+05            | 8.53.E+05            |
| 2842 | P10826-1  | Retinoic acid receptor beta [OS=Homo sapiens]                                                                       | 1.193         | 7.65.E+06         | 8.14.E+06         | 9.58.E+06         | 8.72.E+06         | 1.25.E+06            | 1.17.E+07            | 1.29.E+07            | 1.16.E+07            | 1.40.E+07            | 1.39.E+07            | 1.73.E+07            | 1.43.E+07            |
| 2843 | Q75N90    | Fibrillin-3 [OS=Homo sapiens]                                                                                       | 1.192         |                   |                   | 9.89.E+04         |                   | 6.85.E+04            |                      |                      | 1.64.E+07            |                      |                      |                      |                      |
| 2844 | O94915-1  | protein furry homolog-like [OS=Homo sapiens]                                                                        | 1.191         |                   |                   |                   |                   |                      |                      |                      |                      |                      |                      |                      |                      |
| 2845 | Q9H1D9    | DNA-directed RNA polymerase III subunit RPC6 [OS=Homo sapiens]                                                      | 1.189         |                   |                   |                   |                   |                      |                      |                      |                      |                      |                      |                      |                      |
| 2846 | Q7Z6P3    | Ras-related protein Rab-44 OS=Homo sapiens OX=9606 GN=RAB44 PE=1 SV=4                                               | 1.18          |                   |                   |                   |                   |                      |                      |                      |                      |                      |                      |                      |                      |

Supplemental Data 1. List of identified proteins

| No.  | Accession | Description                                                                      | Sum PEP Score | CTRL Abundances_1 | CTRL Abundances_2 | CTRL Abundances_3 | CTRL Abundances_4 | CLDN6-1 Abundances_1 | CLDN6-1 Abundances_2 | CLDN6-1 Abundances_3 | CLDN6-1 Abundances_4 | CLDN6-2 Abundances_1 | CLDN6-2 Abundances_2 | CLDN6-2 Abundances_3 | CLDN6-2 Abundances_4 |
|------|-----------|----------------------------------------------------------------------------------|---------------|-------------------|-------------------|-------------------|-------------------|----------------------|----------------------|----------------------|----------------------|----------------------|----------------------|----------------------|----------------------|
| 2847 | P29074    | Tyrosine-protein phosphatase non-receptor type 4 [OS=Homo sapiens]               | 1.18          | 5.19.E+07         | 5.41.E+07         | 5.80.E+07         | 7.02.E+07         | 6.07.E+07            | 6.33.E+07            | 6.98.E+07            | 6.53.E+07            | 3.91.E+07            | 3.81.E+07            | 3.74.E+07            | 3.32.E+07            |
| 2848 | P28330    | Long-chain specific acyl-CoA dehydrogenase, mitochondrial [OS=Homo sapiens]      | 1.179         | 9.38.E+06         | 1.02.E+07         | 1.20.E+07         | 1.13.E+07         | 1.16.E+07            | 1.15.E+07            | 1.21.E+07            | 1.06.E+07            | 1.04.E+07            | 1.20.E+07            | 1.31.E+07            | 1.13.E+07            |
| 2849 | Q8WYB5    | Histone acetyltransferase KAT6B [OS=Homo sapiens]                                | 1.151         | 4.16.E+05         | 4.99.E+05         | 5.10.E+05         | 5.56.E+05         | 6.87.E+05            | 7.01.E+05            | 8.34.E+05            | 7.08.E+05            | 5.76.E+05            | 5.30.E+05            | 4.35.E+05            | 5.06.E+05            |
| 2850 | O60346    | PH domain leucine-rich repeat-containing protein phosphatase 1 [OS=Homo sapiens] | 1.145         | 6.19.E+06         | 5.30.E+06         | 4.98.E+06         | 4.64.E+06         | 3.23.E+06            | 4.87.E+06            |                      |                      | 1.05.E+07            | 6.62.E+06            | 9.99.E+06            | 1.01.E+07            |
| 2851 | Q13325    | Interferon-induced protein with tetratricopeptide repeats 5 [OS=Homo sapiens]    | 1.134         |                   |                   |                   |                   |                      |                      |                      |                      |                      |                      |                      |                      |
| 2852 | Q9Y6L7    | Tolloid-like protein 2 [OS=Homo sapiens]                                         | 1.126         |                   |                   |                   |                   |                      |                      |                      |                      |                      |                      |                      |                      |
| 2853 | Q9NQW8    | Cyclic nucleotide-gated cation channel beta-3 [OS=Homo sapiens]                  | 1.125         |                   |                   |                   |                   |                      |                      |                      |                      |                      |                      |                      |                      |
| 2854 | Q96RP9    | Elongation factor G, mitochondrial [OS=Homo sapiens]                             | 1.112         | 3.22.E+06         | 2.91.E+06         | 3.16.E+06         | 7.47.E+06         | 2.17.E+06            | 2.18.E+06            | 2.10.E+06            | 6.91.E+05            | 3.25.E+06            | 3.13.E+06            | 3.91.E+06            | 3.51.E+06            |
| 2855 | Q8WZ59    | Transmembrane protein 190 [OS=Homo sapiens]                                      | 1.11          |                   |                   |                   |                   |                      |                      |                      |                      |                      |                      |                      |                      |
| 2856 | A6NK44    | Glyoxalase domain-containing protein 5 [OS=Homo sapiens]                         | 1.1           | 3.97.E+07         | 4.03.E+07         | 4.14.E+07         | 3.37.E+07         | 3.96.E+07            | 3.67.E+07            | 4.04.E+07            | 3.93.E+07            | 4.68.E+07            | 4.25.E+07            | 4.61.E+07            | 4.33.E+07            |
| 2857 | Q9P0L9    | polycystic kidney disease 2-like 1 protein [OS=Homo sapiens]                     | 1.099         | 4.82.E+05         | 4.37.E+05         | 3.73.E+05         | 5.15.E+05         | 7.16.E+05            | 5.38.E+05            | 8.10.E+05            | 7.51.E+05            | 3.61.E+05            | 1.87.E+05            | 2.93.E+05            | 3.12.E+05            |
| 2858 | Q96EH8    | E3 ubiquitin-protein ligase NEURL3 [OS=Homo sapiens]                             | 1.089         | 2.28.E+07         | 2.50.E+07         | 4.01.E+07         | 2.80.E+07         | 1.94.E+07            |                      |                      |                      | 1.86.E+07            |                      |                      | 1.43.E+07            |
| 2859 | O60312    | Probable phospholipid-transporting ATPase VA [OS=Homo sapiens]                   | 1.086         |                   |                   |                   |                   |                      |                      |                      |                      |                      |                      |                      |                      |
| 2860 | Q5TZJ5    | Spermatogenesis-associated protein 31A1 [OS=Homo sapiens]                        | 1.079         | 3.80.E+07         | 3.13.E+07         | 3.46.E+07         | 4.30.E+07         | 3.68.E+07            | 3.45.E+07            | 3.90.E+07            | 4.20.E+07            | 3.64.E+07            | 3.51.E+07            | 4.21.E+07            | 4.80.E+07            |
| 2861 | Q9Y5I4-1  | Protocadherin alpha-C2 [OS=Homo sapiens]                                         | 1.066         | 7.77.E+05         | 9.08.E+05         | 6.05.E+05         | 9.96.E+05         | 1.00.E+06            | 9.84.E+05            | 1.01.E+06            | 8.68.E+05            | 7.61.E+05            | 6.15.E+05            | 6.11.E+05            | 6.85.E+05            |
| 2862 | Q5VST9    | Obscurin [OS=Homo sapiens]                                                       | 1.066         | 7.96.E+07         | 8.36.E+07         | 6.52.E+07         | 6.33.E+07         | 8.05.E+07            | 6.56.E+07            | 6.20.E+07            | 7.86.E+07            | 1.05.E+08            | 7.34.E+07            | 8.49.E+07            | 8.26.E+07            |
