# Supplementary material for: Aberrant expression of claudin‐6 contributes to malignant potentials and drug resistance of cervical adenocarcinoma
Source: PubMed Central journal article supplement — Cancer Sci. 2022 Feb 13;113(4):1519–30. doi: 10.1111/cas.15284 (PMC8990859; doi:10.1111/cas.15284), 2022-02-13
Supplement: CAS-113-1519-s007.pdf [file CAS-113-1519-s007.pdf]

**Supplemental Data 2. GO terms and KEGG pathways for up-regulated proteins in CLDN6-1 cells**

GO:0098609~cell-cell adhesion

| UniProt Accession Number | Gene Names | Protein Names                                                      | Abundances |           | Standard Error |           |
|--------------------------|------------|--------------------------------------------------------------------|------------|-----------|----------------|-----------|
|                          |            |                                                                    | CTRL       | CLDN6-1   | CTRL           | CLDN6-1   |
| Q14134                   | TRIM29     | Tripartite motif-containing protein 29                             | 3.60.E+08  | 5.71.E+08 | 3.53.E+06      | 1.10.E+07 |
| Q01970                   | PLCB3      | 1-phosphatidylinositol 4,5-bisphosphate phosphodiesterase beta-3   | 9.53.E+06  | 1.55.E+07 | 4.25.E+05      | 6.91.E+05 |
| Q9H6S3                   | EPS8L2     | epidermal growth factor receptor kinase substrate 8-like protein 2 | 1.13.E+08  | 1.86.E+08 | 7.20.E+06      | 2.02.E+06 |
| O14618                   | CCS        | copper chaperone for superoxide dismutase                          | 7.91.E+08  | 1.47.E+09 | 1.72.E+07      | 1.38.E+07 |
| Q16643                   | DBN1       | drebrin                                                            | 7.09.E+06  | 1.26.E+07 | 4.00.E+05      | 1.23.E+05 |
| Q9C0C2                   | TNKS1BP1   | 182 kDa tankyrase-1-binding protein                                | 4.28.E+06  | 6.81.E+06 | 2.12.E+05      | 1.86.E+05 |
| Q8NFI5                   | GPRC5A     | Retinoic acid-induced protein 3                                    | 3.03.E+07  | 1.41.E+08 | 1.26.E+06      | 4.09.E+06 |
| O00515                   | LAD1       | Ladinin-1                                                          | 5.31.E+07  | 8.07.E+07 | 1.94.E+06      | 4.73.E+05 |
| P40121                   | CAPG       | Macrophage-capping protein                                         | 2.24.E+08  | 3.72.E+08 | 9.64.E+05      | 4.52.E+06 |
| Q15417                   | CNN3       | Calponin-3                                                         | 2.72.E+08  | 5.22.E+08 | 5.68.E+06      | 2.28.E+07 |
| Q32MZ4                   | LRRFIP1    | Isoform 3 of Leucine-rich repeat flightless-interacting protein 1  | 1.50.E+08  | 2.73.E+08 | 4.37.E+06      | 1.03.E+07 |
| P50552                   | VASP       | Vasodilator-stimulated phosphoprotein                              | 2.85.E+08  | 5.52.E+08 | 7.62.E+06      | 1.66.E+07 |
| O43795                   | MYO1B      | Unconventional myosin-Ib                                           | 3.32.E+07  | 8.79.E+07 | 1.84.E+06      | 5.70.E+06 |
| Q9NQC3                   | RTN4       | Isoform 2 of Reticulon-4                                           | 6.07.E+08  | 9.82.E+08 | 2.03.E+07      | 3.00.E+07 |
| Q14847                   | LASP1      | LIM and SH3 domain protein 1                                       | 2.72.E+08  | 5.75.E+08 | 1.86.E+07      | 2.53.E+06 |

GO:0005913~cell-cell adherens junction

| UniProt Accession Number | Gene Names | Protein Names                                                      | Abundances |           | Standard Error |           |
|--------------------------|------------|--------------------------------------------------------------------|------------|-----------|----------------|-----------|
|                          |            |                                                                    | CTRL       | CLDN6-1   | CTRL           | CLDN6-1   |
| Q14134                   | TRIM29     | Tripartite motif-containing protein 29                             | 3.60.E+08  | 5.71.E+08 | 3.53.E+06      | 1.10.E+07 |
| P21333                   | FLNA       | Filamin-A                                                          | 1.07.E+10  | 1.75.E+10 | 2.71.E+07      | 6.72.E+07 |
| Q9H6S3                   | EPS8L2     | epidermal growth factor receptor kinase substrate 8-like protein 2 | 1.13.E+08  | 1.86.E+08 | 7.20.E+06      | 2.02.E+06 |
| Q01970                   | PLCB3      | 1-phosphatidylinositol 4,5-bisphosphate phosphodiesterase beta-3   | 9.53.E+06  | 1.55.E+07 | 4.25.E+05      | 6.91.E+05 |
| O14618                   | CCS        | copper chaperone for superoxide dismutase                          | 7.91.E+08  | 1.47.E+09 | 1.72.E+07      | 1.38.E+07 |
| Q16643                   | DBN1       | drebrin                                                            | 7.09.E+06  | 1.26.E+07 | 4.00.E+05      | 1.23.E+05 |
| Q9C0C2                   | TNKS1BP1   | 182 kDa tankyrase-1-binding protein                                | 4.28.E+06  | 6.81.E+06 | 2.12.E+05      | 1.86.E+05 |
| Q8NFI5                   | GPRC5A     | Retinoic acid-induced protein 3                                    | 3.03.E+07  | 1.41.E+08 | 1.26.E+06      | 4.09.E+06 |
| O00515                   | LAD1       | Ladinin-1                                                          | 5.31.E+07  | 8.07.E+07 | 1.94.E+06      | 4.73.E+05 |
| P40121                   | CAPG       | Macrophage-capping protein                                         | 2.24.E+08  | 3.72.E+08 | 9.64.E+05      | 4.52.E+06 |
| Q15417                   | CNN3       | Calponin-3                                                         | 2.72.E+08  | 5.22.E+08 | 5.68.E+06      | 2.28.E+07 |
| Q32MZ4                   | LRRFIP1    | Isoform 3 of Leucine-rich repeat flightless-interacting protein 1  | 1.50.E+08  | 2.73.E+08 | 4.37.E+06      | 1.03.E+07 |
| P50552                   | VASP       | Vasodilator-stimulated phosphoprotein                              | 2.85.E+08  | 5.52.E+08 | 7.62.E+06      | 1.66.E+07 |

|        |       |                              |           |           |           |           |
|--------|-------|------------------------------|-----------|-----------|-----------|-----------|
| P15151 | PVR   | Poliovirus receptor          | 7.02.E+07 | 1.11.E+08 | 6.70.E+05 | 6.72.E+05 |
| O43795 | MYO1B | Unconventional myosin-Ib     | 3.32.E+07 | 8.79.E+07 | 1.84.E+06 | 5.70.E+06 |
| Q9NQC3 | RTN4  | Isoform 2 of Reticulon-4     | 6.07.E+08 | 9.82.E+08 | 2.03.E+07 | 3.00.E+07 |
| P23229 | ITGA6 | integrin alpha-6             | 5.60.E+07 | 1.75.E+08 | 2.93.E+06 | 8.91.E+06 |
| Q14847 | LASP1 | LIM and SH3 domain protein 1 | 2.72.E+08 | 5.75.E+08 | 1.86.E+07 | 2.53.E+06 |

GO:0005925~focal adhesion

| UniProt Accession Number | Gene Names | Protein Names                                                 | Abundances |           | Standard Error |           |
|--------------------------|------------|---------------------------------------------------------------|------------|-----------|----------------|-----------|
|                          |            |                                                               | CTRL       | CLDN6-1   | CTRL           | CLDN6-1   |
| P21333                   | FLNA       | Filamin-A                                                     | 1.07.E+10  | 1.75.E+10 | 2.71.E+07      | 6.72.E+07 |
| P07384                   | CAPN1      | Calpain-1 catalytic subunit                                   | 7.50.E+08  | 1.21.E+09 | 1.36.E+07      | 1.71.E+07 |
| Q13443                   | ADAM9      | disintegrin and metalloproteinase domain-containing protein 9 | 1.19.E+06  | 3.03.E+06 | 8.34.E+04      | 1.22.E+05 |
| P24821                   | TNC        | Tenascin                                                      | 1.01.E+06  | 8.97.E+06 | 2.46.E+05      | 9.68.E+05 |
| Q15417                   | CNN3       | Calponin-3                                                    | 2.72.E+08  | 5.22.E+08 | 5.68.E+06      | 2.28.E+07 |
| P50552                   | VASP       | Vasodilator-stimulated phosphoprotein                         | 2.85.E+08  | 5.52.E+08 | 7.62.E+06      | 1.66.E+07 |
| P15151                   | PVR        | Poliovirus receptor                                           | 7.02.E+07  | 1.11.E+08 | 6.70.E+05      | 6.72.E+05 |
| Q04725                   | TLE2       | Transducin-like enhancer protein 2                            | 1.92.E+06  | 3.19.E+06 | 8.84.E+04      | 1.42.E+05 |
| P29966                   | MARCKS     | Myristoylated alanine-rich C-kinase substrate                 | 8.23.E+07  | 2.28.E+08 | 4.86.E+06      | 3.20.E+06 |
| Q9NR12                   | PDLIM7     | PDZ and LIM domain protein 7                                  | 2.75.E+07  | 7.05.E+07 | 1.56.E+06      | 2.66.E+06 |
| Q96B97                   | SH3KBP1    | SH3 domain-containing kinase-binding protein 1                | 9.70.E+06  | 2.17.E+07 | 4.02.E+05      | 7.50.E+05 |
| P62330                   | ARF6       | ADP-ribosylation factor 6                                     | 3.12.E+07  | 7.05.E+07 | 1.27.E+06      | 6.56.E+06 |
| P67936                   | TPM4       | Tropomyosin alpha-4 chain                                     | 9.99.E+08  | 1.50.E+09 | 3.65.E+07      | 5.70.E+06 |
| P23229                   | ITGA6      | integrin alpha-6                                              | 5.60.E+07  | 1.75.E+08 | 2.93.E+06      | 8.91.E+06 |
| Q14847                   | LASP1      | LIM and SH3 domain protein 1                                  | 2.72.E+08  | 5.75.E+08 | 1.86.E+07      | 2.53.E+06 |
| P16070                   | CD44       | CD44 antigen                                                  | 6.27.E+08  | 1.11.E+09 | 1.75.E+07      | 6.60.E+06 |
| P35658                   | NUP214     | Nuclear pore complex protein Nup214                           | 6.73.E+06  | 1.25.E+07 | 5.79.E+05      | 4.68.E+05 |

GO:0098641~cadherin binding involved in cell-cell adhesion

| UniProt Accession Number | Gene Names | Protein Names                                                      | Abundances |           | Standard Error |           |
|--------------------------|------------|--------------------------------------------------------------------|------------|-----------|----------------|-----------|
|                          |            |                                                                    | CTRL       | CLDN6-1   | CTRL           | CLDN6-1   |
| Q14134                   | TRIM29     | Tripartite motif-containing protein 29                             | 3.60.E+08  | 5.71.E+08 | 3.53.E+06      | 1.10.E+07 |
| P21333                   | FLNA       | Filamin-A                                                          | 1.07.E+10  | 1.75.E+10 | 2.71.E+07      | 6.72.E+07 |
| Q9H6S3                   | EPS8L2     | epidermal growth factor receptor kinase substrate 8-like protein 2 | 1.13.E+08  | 1.86.E+08 | 7.20.E+06      | 2.02.E+06 |
| Q01970                   | PLCB3      | 1-phosphatidylinositol 4,5-bisphosphate phosphodiesterase beta-3   | 9.53.E+06  | 1.55.E+07 | 4.25.E+05      | 6.91.E+05 |
| O14618                   | CCS        | copper chaperone for superoxide dismutase                          | 7.91.E+08  | 1.47.E+09 | 1.72.E+07      | 1.38.E+07 |
| Q16643                   | DBN1       | drebrin                                                            | 7.09.E+06  | 1.26.E+07 | 4.00.E+05      | 1.23.E+05 |
| Q9C0C2                   | TNKS1BP1   | 182 kDa tankyrase-1-binding protein                                | 4.28.E+06  | 6.81.E+06 | 2.12.E+05      | 1.86.E+05 |

|        |         |                                                                   |           |           |           |           |
|--------|---------|-------------------------------------------------------------------|-----------|-----------|-----------|-----------|
| Q8NFJ5 | GPRC5A  | Retinoic acid-induced protein 3                                   | 3.03.E+07 | 1.41.E+08 | 1.26.E+06 | 4.09.E+06 |
| O00515 | LAD1    | Ladinin-1                                                         | 5.31.E+07 | 8.07.E+07 | 1.94.E+06 | 4.73.E+05 |
| P40121 | CAPG    | Macrophage-capping protein                                        | 2.24.E+08 | 3.72.E+08 | 9.64.E+05 | 4.52.E+06 |
| Q15417 | CNN3    | Calponin-3                                                        | 2.72.E+08 | 5.22.E+08 | 5.68.E+06 | 2.28.E+07 |
| Q32MZ4 | LRRFIP1 | Isoform 3 of Leucine-rich repeat flightless-interacting protein 1 | 1.50.E+08 | 2.73.E+08 | 4.37.E+06 | 1.03.E+07 |
| P50552 | VASP    | Vasodilator-stimulated phosphoprotein                             | 2.85.E+08 | 5.52.E+08 | 7.62.E+06 | 1.66.E+07 |
| O43795 | MYO1B   | Unconventional myosin-Ib                                          | 3.32.E+07 | 8.79.E+07 | 1.84.E+06 | 5.70.E+06 |
| Q9NQC3 | RTN4    | Isoform 2 of Reticulon-4                                          | 6.07.E+08 | 9.82.E+08 | 2.03.E+07 | 3.00.E+07 |
| P23229 | ITGA6   | integrin alpha-6                                                  | 5.60.E+07 | 1.75.E+08 | 2.93.E+06 | 8.91.E+06 |
| Q14847 | LASP1   | LIM and SH3 domain protein 1                                      | 2.72.E+08 | 5.75.E+08 | 1.86.E+07 | 2.53.E+06 |

hsa04510~Focal adhesion

| UniProt Accession Number | Gene Names | Protein Names                            | Abundances |           | Standard Error |           |
|--------------------------|------------|------------------------------------------|------------|-----------|----------------|-----------|
|                          |            |                                          | CTRL       | CLDN6-1   | CTRL           | CLDN6-1   |
| Q13753                   | LAMC2      | Laminin subunit gamma-2                  | 1.52.E+07  | 2.54.E+07 | 2.86.E+06      | 8.95.E+05 |
| P24821                   | TNC        | Tenascin                                 | 1.01.E+06  | 8.97.E+06 | 2.46.E+05      | 9.68.E+05 |
| P50552                   | VASP       | Vasodilator-stimulated phosphoprotein    | 2.85.E+08  | 5.52.E+08 | 7.62.E+06      | 1.66.E+07 |
| Q13751                   | LAMB3      | Laminin subunit beta-3                   | 1.57.E+07  | 2.52.E+07 | 7.14.E+05      | 2.29.E+05 |
| P31751                   | AKT2       | RAC-beta serine/threonine-protein kinase | 2.73.E+06  | 4.33.E+06 | 3.28.E+05      | 2.62.E+05 |
| P21333                   | FLNA       | Filamin-A                                | 1.07.E+10  | 1.75.E+10 | 2.71.E+07      | 6.72.E+07 |
| P16144                   | ITGB4      | Integrin beta-4                          | 1.23.E+08  | 2.43.E+08 | 1.19.E+07      | 5.49.E+06 |
| Q9NRY4                   | ARHGAP35   | Rho GTPase-activating protein 35         | 3.15.E+06  | 4.81.E+06 | 2.76.E+05      | 2.41.E+05 |
| P23229                   | ITGA6      | integrin alpha-6                         | 5.60.E+07  | 1.75.E+08 | 2.93.E+06      | 8.91.E+06 |

hsa04512~ECM-receptor interaction

| UniProt Accession Number | Gene Names | Protein Names           | Abundances |           | Standard Error |           |
|--------------------------|------------|-------------------------|------------|-----------|----------------|-----------|
|                          |            |                         | CTRL       | CLDN6-1   | CTRL           | CLDN6-1   |
| Q13753                   | LAMC2      | Laminin subunit gamma-2 | 1.52.E+07  | 2.54.E+07 | 2.86.E+06      | 8.95.E+05 |
| P24821                   | TNC        | Tenascin                | 1.01.E+06  | 8.97.E+06 | 2.46.E+05      | 9.68.E+05 |
| Q13751                   | LAMB3      | Laminin subunit beta-3  | 1.57.E+07  | 2.52.E+07 | 7.14.E+05      | 2.29.E+05 |
| P16144                   | ITGB4      | Integrin beta-4         | 1.23.E+08  | 2.43.E+08 | 1.19.E+07      | 5.49.E+06 |
| P23229                   | ITGA6      | integrin alpha-6        | 5.60.E+07  | 1.75.E+08 | 2.93.E+06      | 8.91.E+06 |
| P16070                   | CD44       | CD44 antigen            | 6.27.E+08  | 1.11.E+09 | 1.75.E+07      | 6.60.E+06 |
